# Supplementary material for: Noncovalent chemistry of xenon opens the door for anesthetic xenon recovery using Bio-MOFs
Source: Royal Society of Chemistry journal article supplement (doi:10.1039/d3cp03066k), 2023-01-01
Supplement: d3cp03066k1.pdf [file d3cp03066k1.pdf]

# Noncovalent Chemistry of Xenon Opens the Door for Anesthetic Xenon Recovery Using Bio-MOFs

**Behra Canturk, Zekiye Erarslan, and Yeliz Gurdal\***

*Department of Bioengineering,*

*Adana Alparslan Türkeş Science and Technology University,*

*Balcalı Mah. Güney Kampüs 10 Sokak No:1U, 01250 Sarıçam/Adana, Türkiye*

*\* ygurdal@atu.edu.tr*

## **S1. Bio-MOFs under consideration**

**Table S1.** Structural parameters of the Bio-MOFs under consideration. LCD stands for the largest cavity diameter in Å, PLD is pore limiting diameter in Å, and SA is surface area in m<sup>2</sup>/g. PLD and LCD are defined as the smallest opening along the pore and the largest size of the included sphere that can fit to the pores, respectively. For more detailed information we refer reader to the MOFDB API Database or to the Cambridge Crystallographic Data Centre (CCDC).

|    | MOFs     | Ligands                                          | Metal Sites | LCD (Å) | PLD (Å) | Void Fraction | SA (m <sup>2</sup> /g) |
|----|----------|--------------------------------------------------|-------------|---------|---------|---------------|------------------------|
| 1  | BIPSUQ   | Metalloporphyrin                                 | Cu          | 18.61   | 16.93   | 0.83          | 4502.66                |
| 2  | BEDYEQ   | Metalloporphyrin                                 | Zr          | 32.02   | 31      | 0.86          | 2737.39                |
| 3  | CAYYEG   | Metalloporphyrin                                 | Mn          | 7.23    | 5.23    | 0.48          | 544.7                  |
| 4  | BEWCUD   | Metalloporphyrin                                 | Zn          | 10.59   | 8.54    | 0.81          | 4454.34                |
| 5  | ADUWIH   | Hexacarboxylate                                  | Zn          | 9.28    | 6.55    | 0.72          | 2605.83                |
| 6  | ADUWON   | Hexacarboxylate                                  | Ni          | 16.38   | 6       | 0.78          | 4298.28                |
| 7  | ZEZFIV   | Triazine                                         | Na, Zn      | 10.69   | 9.42    | 0.74          | 3541.03                |
| 8  | AGOF EJ  | Pyrazole                                         | Cu          | 12.61   | 8.72    | 0.76          | 3269.05                |
| 9  | DUPVER   | Adenine, Tricarboxylic Acid                      | Zn          | 9.93    | 6.47    | 0.73          | 2595.58                |
| 10 | LONWIW   | Dimethylformamide                                | Mg          | 6.33    | 5.31    | 0.66          | 2526                   |
| 11 | RUGKOV   | Adenine, Pyrazole Carboxylic Acid                | Zn          | 6.88    | 5.43    | 0.69          | 2525.58                |
| 12 | ZUGDEM   | Benzene Tricarboxylic acid, Adenine              | Zn          | 9.67    | 5.99    | 0.69          | 2360.71                |
| 13 | FIQCEN   | Benzene Tricarboxylic Acid                       | Cu          | 13.19   | 6.67    | 0.76          | 2132.15                |
| 14 | IVILEG   | Adenine Carboxylate                              | Zn          | 14.15   | 13.27   | 0.72          | 2021.31                |
| 15 | VAGTAA   | Dimethylformamide                                | Mg          | 5.69    | 4.4     | 0.59          | 1703.3                 |
| 16 | ACIBOE   | Benzene Tricarboxylic Acid                       | Zn          | 8.26    | 7.04    | 0.62          | 1609.46                |
| 17 | AFUKET   | Imidazol                                         | Mn          | 5.97    | 4.78    | 0.55          | 1468.14                |
| 18 | WURKEB   | Dimethylformamide, Carboxylic Acid               | Mn          | 6.33    | 4.86    | 0.63          | 1463.97                |
| 19 | DUBWON   | Dimethylformamide, Carboxylic Acid               | Zn          | 5.41    | 4.74    | 0.57          | 1224.95                |
| 20 | CETHEQ   | Triazole                                         | Cu          | 8.75    | 7.35    | 0.58          | 1217.73                |
| 21 | EZOFEF   | Dimethylformamide, Benzene Tricarboxylic Acid    | Ni          | 11.24   | 4.57    | 0.64          | 1161.91                |
| 22 | NUDLAA   | Adenine, Benzoic Acid                            | Zn          | 10.11   | 9.13    | 0.58          | 1069.49                |
| 23 | BEPNOB   | Pyridine                                         | Zn          | 9.66    | 9.56    | 0.55          | 899.02                 |
| 24 | BEPMAM   | Pyridine                                         | Zn          | 9.65    | 9.57    | 0.55          | 898.91                 |
| 25 | BEPLUF   | Pyridine                                         | Zn          | 9.84    | 9.74    | 0.56          | 960.82                 |
| 26 | BEPNUH   | Pyridine                                         | Zn          | 10.31   | 10.21   | 0.47          | 864.84                 |
| 27 | BEPPOD   | Pyridine                                         | Zn          | 9.62    | 9.5     | 0.49          | 796.08                 |
| 28 | BEPPAP   | Pyridine                                         | Zn          | 9.89    | 9.78    | 0.43          | 1029.42                |
| 29 | XACZEH   | Adenine                                          | Cu          | 10.61   | 7.24    | 0.59          | 720.8                  |
| 30 | BEYSEF   | Adenine                                          | Co          | 5.62    | 4.75    | 0.4           | 1020.51                |
| 31 | LUSHOX04 | Dimethylformamide, Benzene Dicarboxylic Acid     | Mn          | 5.43    | 4.96    | 0.54          | 909.61                 |
| 32 | LIXWAR   | Dimethylformamide, Naphthalene                   | Mn          | 5.6     | 3.91    | 0.53          | 883.22                 |
| 33 | LUSHOX   | Dimethylformamide, Benzene Dicarboxylic Acid     | Mn          | 5.31    | 4.92    | 0.5           | 864.79                 |
| 34 | LUSHOX02 | Dimethylformamide, Benzene Dicarboxylic Acid     | Mn          | 5.4     | 4.93    | 0.51          | 859.89                 |
| 35 | LUSHOX01 | Dimethylformamide, Benzene Dicarboxylic Acid     | Mn          | 5.26    | 4.89    | 0.49          | 833.1                  |
| 36 | LUSHOX03 | Dimethylformamide, Benzene Dicarboxylic Acid     | Mn          | 5.24    | 4.88    | 0.52          | 823.97                 |
| 37 | IZUMUM   | Adenine, Carboxylate                             | Cu          | 5.58    | 4.65    | 0.38          | 756.79                 |
| 38 | DOMKEX   | Porphyrin                                        | Na          | 6.2     | 5.2     | 0.43          | 730.1                  |
| 39 | ADAXIO   | Bipyridine, Benzene Dicarboxylic Acid            | Co          | 5.73    | 5.01    | 0.49          | 724.96                 |
| 40 | QOHTUD   | Muconato, Pyridine                               | Co          | 6.67    | 5.81    | 0.49          | 694.26                 |
| 41 | BEPNIV   | Pyridine, Carboxylate                            | Zn          | 8.14    | 8.04    | 0.64          | 687.54                 |
| 42 | BEPPIX   | Pyridine, Carboxylate                            | Zn          | 7.72    | 7.6     | 0.59          | 630.17                 |
| 43 | XILVIZ   | Metalloporphyrin, Naphthalenetetracarboxydiimide | Zn          | 5.53    | 4.18    | 0.64          | 543.39                 |

## S2. Gravimetric and Volumetric Xe Adsorption



**FIG. 1.** Gravimetric (wt%) and volumetric (g/L) Xenon adsorption of the top performing Bio-MOFs for (a) Xe/CO<sub>2</sub>:80/20, (b) Xe/O<sub>2</sub>:80/20, and (c) Xe/N<sub>2</sub>:80/20 mixtures calculated at 298 K. While figures on the left hand side show gravimetric Xe uptake varying with pressure, figures on the right hand side depict volumetric Xe uptakes. Color code: red: ADUWON, yellow: AGOFEJ, orange: BEDYEQ, black: BEWCUD, green: BIPSUQ, purple: ZEFIV.

**S3. CIF files and calculated DDEC charges of the Bio-MOFs under consideration. Cif files taken from the MOFXDB API Database are modified by adding DDEC6 atomic charges which are calculated in this work.**

```

data_ACIBOE_clean
_audit_creation_date      2014-07-02
_audit_creation_method    'Materials Studio'
_symmetry_space_group_name_H-M  'P1'
_symmetry_Int_Tables_number  1
_symmetry_cell_setting    triclinic
loop_
_symmetry_equiv_pos_as_xyz
  x,y,z
_cell_length_a            17.0713
_cell_length_b            17.0713
_cell_length_c            17.0713
_cell_angle_alpha         105.8300
_cell_angle_beta          105.8300

_cell_angle_gamma         117.0290
loop_
_atom_site_label
_atom_site_type_symbol
_atom_site_fract_x
_atom_site_fract_y
_atom_site_fract_z
_atom_site_U_iso_or_equiv
_atom_site_adp_type
_atom_site_occupancy
_atom_site_charge
Zn1  Zn   0.1614 0.29871    0.62295    0.01267    Uiso  1    0.957
Zn2  Zn   0.67576    0.53845    0.37705    0.01267    Uiso  1    0.959
Zn3  Zn   0.53845    0.1614 0.86269    0.01267    Uiso  1    0.959
Zn4  Zn   0.29871    0.67576    0.13731    0.01267    Uiso  1    0.960
Zn5  Zn   0.17576    0.79871    0.13731    0.01267    Uiso  1    0.957
Zn6  Zn   0.6614 0.03845    0.86269    0.01267    Uiso  1    0.959
Zn7  Zn   0.79871    0.6614 0.62295    0.01267    Uiso  1    0.959
Zn8  Zn   0.03845    0.17576    0.37705    0.01267    Uiso  1    0.958
Zn9  Zn   0.92966    0.11582    0.5    0.01267    Uiso  1    1.049
Zn10 Zn   0.61582    0.42966    0.5    0.01267    Uiso  1    1.049
Zn11 Zn   0.42966    0.92966    0.81384    0.01267    Uiso  1    1.049
Zn12 Zn   0.11582    0.61582    0.18616    0.01267    Uiso  1    1.049
H1   H    0.9406 0.3329 0.9651 0.01267    Uiso  1    0.138
H2   H    0.8573 0.1715 0.6998 0.01267    Uiso  1    0.138
H3   H    0.1229 0.4358 0.8571 0.01267    Uiso  1    0.141
H4   H    0.3678 0.9755 0.0349 0.01267    Uiso  1    0.138
H5   H    0.4717 0.1575 0.3002 0.01267    Uiso  1    0.154
H6   H    0.5787 0.2658 0.1429 0.01267    Uiso  1    0.141
H7   H    0.9755 0.9406 0.6077 0.01267    Uiso  1    0.138
H8   H    0.1575 0.8573 0.6858 0.01267    Uiso  1    0.153
H9   H    0.2658 0.1229 0.6871 0.01267    Uiso  1    0.141
H10  H    0.3329 0.3678 0.3923 0.01267    Uiso  1    0.138

```

|     |   |        |        |        |         |      |   |        |
|-----|---|--------|--------|--------|---------|------|---|--------|
| H11 | H | 0.1715 | 0.4717 | 0.3142 | 0.01267 | Uiso | 1 | 0.138  |
| H12 | H | 0.4358 | 0.5787 | 0.3129 | 0.01267 | Uiso | 1 | 0.141  |
| H13 | H | 0.8678 | 0.8329 | 0.3923 | 0.01267 | Uiso | 1 | 0.138  |
| H14 | H | 0.9717 | 0.6715 | 0.3142 | 0.01267 | Uiso | 1 | 0.138  |
| H15 | H | 0.0787 | 0.9358 | 0.3129 | 0.01267 | Uiso | 1 | 0.141  |
| H16 | H | 0.4406 | 0.4755 | 0.6077 | 0.01267 | Uiso | 1 | 0.138  |
| H17 | H | 0.3573 | 0.6575 | 0.6858 | 0.01267 | Uiso | 1 | 0.153  |
| H18 | H | 0.6229 | 0.7658 | 0.6871 | 0.01267 | Uiso | 1 | 0.141  |
| H19 | H | 0.8329 | 0.4406 | 0.9651 | 0.01267 | Uiso | 1 | 0.138  |
| H20 | H | 0.6715 | 0.3573 | 0.6998 | 0.01267 | Uiso | 1 | 0.138  |
| H21 | H | 0.9358 | 0.6229 | 0.8571 | 0.01267 | Uiso | 1 | 0.141  |
| H22 | H | 0.4755 | 0.8678 | 0.0349 | 0.01267 | Uiso | 1 | 0.138  |
| H23 | H | 0.6575 | 0.9717 | 0.3002 | 0.01267 | Uiso | 1 | 0.154  |
| H24 | H | 0.7658 | 0.0787 | 0.1429 | 0.01267 | Uiso | 1 | 0.141  |
| C1  | C | 0.0421 | 0.3999 | 0.9242 | 0.01267 | Uiso | 1 | -0.019 |
| C2  | C | 0.9539 | 0.3255 | 0.9152 | 0.01267 | Uiso | 1 | -0.106 |
| C3  | C | 0.8847 | 0.239  | 0.8307 | 0.01267 | Uiso | 1 | -0.006 |
| C4  | C | 0.9039 | 0.228  | 0.7561 | 0.01267 | Uiso | 1 | -0.116 |
| C5  | C | 0.9935 | 0.3021 | 0.7656 | 0.01267 | Uiso | 1 | -0.007 |
| C6  | C | 0.0628 | 0.3873 | 0.8503 | 0.01267 | Uiso | 1 | -0.099 |
| C7  | C | 0.9788 | 0.9931 | 0.3781 | 0.01267 | Uiso | 1 | 0.605  |
| C8  | C | 0.7908 | 0.1551 | 0.8201 | 0.01267 | Uiso | 1 | 0.549  |
| C9  | C | 0.0175 | 0.2845 | 0.686  | 0.01267 | Uiso | 1 | 0.603  |
| C10 | C | 0.4757 | 0.1179 | 0.0758 | 0.01267 | Uiso | 1 | -0.024 |
| C11 | C | 0.4103 | 0.0387 | 0.0848 | 0.01267 | Uiso | 1 | -0.104 |
| C12 | C | 0.4083 | 0.054  | 0.1693 | 0.01267 | Uiso | 1 | -0.006 |
| C13 | C | 0.4719 | 0.1478 | 0.2439 | 0.01267 | Uiso | 1 | -0.132 |
| C14 | C | 0.5365 | 0.2279 | 0.2344 | 0.01267 | Uiso | 1 | -0.005 |
| C15 | C | 0.537  | 0.2125 | 0.1497 | 0.01267 | Uiso | 1 | -0.097 |
| C16 | C | 0.615  | 0.6007 | 0.6219 | 0.01267 | Uiso | 1 | 0.605  |
| C17 | C | 0.335  | 0.9707 | 0.1799 | 0.01267 | Uiso | 1 | 0.549  |
| C18 | C | 0.5985 | 0.3315 | 0.314  | 0.01267 | Uiso | 1 | 0.602  |
| C19 | C | 0.1179 | 0.0421 | 0.6422 | 0.01267 | Uiso | 1 | -0.023 |
| C20 | C | 0.0387 | 0.9539 | 0.6284 | 0.01267 | Uiso | 1 | -0.107 |
| C21 | C | 0.054  | 0.8847 | 0.6457 | 0.01267 | Uiso | 1 | -0.007 |
| C22 | C | 0.1478 | 0.9039 | 0.6759 | 0.01267 | Uiso | 1 | -0.130 |
| C23 | C | 0.2279 | 0.9935 | 0.6914 | 0.01267 | Uiso | 1 | -0.007 |
| C24 | C | 0.2125 | 0.0628 | 0.6755 | 0.01267 | Uiso | 1 | -0.097 |
| C25 | C | 0.6007 | 0.9788 | 0.9857 | 0.01267 | Uiso | 1 | 0.605  |
| C26 | C | 0.9707 | 0.7908 | 0.6357 | 0.01267 | Uiso | 1 | 0.548  |
| C27 | C | 0.3315 | 0.0175 | 0.733  | 0.01267 | Uiso | 1 | 0.603  |
| C28 | C | 0.3999 | 0.4757 | 0.3578 | 0.01267 | Uiso | 1 | -0.023 |
| C29 | C | 0.3255 | 0.4103 | 0.3716 | 0.01267 | Uiso | 1 | -0.105 |
| C30 | C | 0.239  | 0.4083 | 0.3543 | 0.01267 | Uiso | 1 | -0.006 |
| C31 | C | 0.228  | 0.4719 | 0.3241 | 0.01267 | Uiso | 1 | -0.115 |
| C32 | C | 0.3021 | 0.5365 | 0.3086 | 0.01267 | Uiso | 1 | -0.008 |
| C33 | C | 0.3873 | 0.537  | 0.3245 | 0.01267 | Uiso | 1 | -0.096 |
| C34 | C | 0.9931 | 0.615  | 0.0143 | 0.01267 | Uiso | 1 | 0.604  |
| C35 | C | 0.1551 | 0.335  | 0.3643 | 0.01267 | Uiso | 1 | 0.548  |
| C36 | C | 0.2845 | 0.5985 | 0.267  | 0.01267 | Uiso | 1 | 0.603  |
| C37 | C | 0.9757 | 0.8999 | 0.3578 | 0.01267 | Uiso | 1 | -0.023 |
| C38 | C | 0.9103 | 0.8255 | 0.3716 | 0.01267 | Uiso | 1 | -0.105 |

|     |   |        |        |        |         |      |   |        |
|-----|---|--------|--------|--------|---------|------|---|--------|
| C39 | C | 0.9083 | 0.739  | 0.3543 | 0.01267 | Uiso | 1 | -0.005 |
| C40 | C | 0.9719 | 0.728  | 0.3241 | 0.01267 | Uiso | 1 | -0.115 |
| C41 | C | 0.0365 | 0.8021 | 0.3086 | 0.01267 | Uiso | 1 | -0.008 |
| C42 | C | 0.037  | 0.8873 | 0.3245 | 0.01267 | Uiso | 1 | -0.096 |
| C43 | C | 0.115  | 0.4931 | 0.0143 | 0.01267 | Uiso | 1 | 0.604  |
| C44 | C | 0.835  | 0.6551 | 0.3643 | 0.01267 | Uiso | 1 | 0.549  |
| C45 | C | 0.0985 | 0.7845 | 0.267  | 0.01267 | Uiso | 1 | 0.603  |
| C46 | C | 0.5421 | 0.6179 | 0.6422 | 0.01267 | Uiso | 1 | -0.023 |
| C47 | C | 0.4539 | 0.5387 | 0.6284 | 0.01267 | Uiso | 1 | -0.106 |
| C48 | C | 0.3847 | 0.554  | 0.6457 | 0.01267 | Uiso | 1 | -0.008 |
| C49 | C | 0.4039 | 0.6478 | 0.6759 | 0.01267 | Uiso | 1 | -0.131 |
| C50 | C | 0.4935 | 0.7279 | 0.6914 | 0.01267 | Uiso | 1 | -0.006 |
| C51 | C | 0.5628 | 0.7125 | 0.6755 | 0.01267 | Uiso | 1 | -0.099 |
| C52 | C | 0.4788 | 0.1007 | 0.9857 | 0.01267 | Uiso | 1 | 0.605  |
| C53 | C | 0.2908 | 0.4707 | 0.6357 | 0.01267 | Uiso | 1 | 0.549  |
| C54 | C | 0.5175 | 0.8315 | 0.733  | 0.01267 | Uiso | 1 | 0.602  |
| C55 | C | 0.8999 | 0.5421 | 0.9242 | 0.01267 | Uiso | 1 | -0.020 |
| C56 | C | 0.8255 | 0.4539 | 0.9152 | 0.01267 | Uiso | 1 | -0.106 |
| C57 | C | 0.739  | 0.3847 | 0.8307 | 0.01267 | Uiso | 1 | -0.006 |
| C58 | C | 0.728  | 0.4039 | 0.7561 | 0.01267 | Uiso | 1 | -0.117 |
| C59 | C | 0.8021 | 0.4935 | 0.7656 | 0.01267 | Uiso | 1 | -0.007 |
| C60 | C | 0.8873 | 0.5628 | 0.8503 | 0.01267 | Uiso | 1 | -0.099 |
| C61 | C | 0.4931 | 0.4788 | 0.3781 | 0.01267 | Uiso | 1 | 0.605  |
| C62 | C | 0.6551 | 0.2908 | 0.8201 | 0.01267 | Uiso | 1 | 0.549  |
| C63 | C | 0.7845 | 0.5175 | 0.686  | 0.01267 | Uiso | 1 | 0.604  |
| C64 | C | 0.6179 | 0.9757 | 0.0758 | 0.01267 | Uiso | 1 | -0.022 |
| C65 | C | 0.5387 | 0.9103 | 0.0848 | 0.01267 | Uiso | 1 | -0.107 |
| C66 | C | 0.554  | 0.9083 | 0.1693 | 0.01267 | Uiso | 1 | -0.007 |
| C67 | C | 0.6478 | 0.9719 | 0.2439 | 0.01267 | Uiso | 1 | -0.130 |
| C68 | C | 0.7279 | 0.0365 | 0.2344 | 0.01267 | Uiso | 1 | -0.007 |
| C69 | C | 0.7125 | 0.037  | 0.1497 | 0.01267 | Uiso | 1 | -0.098 |
| C70 | C | 0.1007 | 0.115  | 0.6219 | 0.01267 | Uiso | 1 | 0.605  |
| C71 | C | 0.4707 | 0.835  | 0.1799 | 0.01267 | Uiso | 1 | 0.549  |
| C72 | C | 0.8315 | 0.0985 | 0.314  | 0.01267 | Uiso | 1 | 0.603  |
| O1  | O | 0.0404 | 0.0583 | 0.3657 | 0.01267 | Uiso | 1 | -0.506 |
| O2  | O | 0.9189 | 0.9986 | 0.4037 | 0.01267 | Uiso | 1 | -0.570 |
| O3  | O | 0.7881 | 0.1534 | 0.8939 | 0.01267 | Uiso | 1 | -0.502 |
| O4  | O | 0.7239 | 0.0933 | 0.7438 | 0.01267 | Uiso | 1 | -0.373 |
| O5  | O | 0.9443 | 0.2252 | 0.6079 | 0.01267 | Uiso | 1 | -0.512 |
| O6  | O | 0.1095 | 0.3304 | 0.7061 | 0.01267 | Uiso | 1 | -0.528 |
| O7  | O | 0.6926 | 0.6747 | 0.6343 | 0.01267 | Uiso | 1 | -0.502 |
| O8  | O | 0.5949 | 0.5152 | 0.5963 | 0.01267 | Uiso | 1 | -0.571 |
| O9  | O | 0.2595 | 0.8942 | 0.1061 | 0.01267 | Uiso | 1 | -0.501 |
| O10 | O | 0.3495 | 0.9801 | 0.2562 | 0.01267 | Uiso | 1 | -0.374 |
| O11 | O | 0.6173 | 0.3364 | 0.3921 | 0.01267 | Uiso | 1 | -0.515 |
| O12 | O | 0.6243 | 0.4034 | 0.2939 | 0.01267 | Uiso | 1 | -0.523 |
| O13 | O | 0.6747 | 0.0404 | 0.9821 | 0.01267 | Uiso | 1 | -0.504 |
| O14 | O | 0.5152 | 0.9189 | 0.9203 | 0.01267 | Uiso | 1 | -0.573 |
| O15 | O | 0.8942 | 0.7881 | 0.6347 | 0.01267 | Uiso | 1 | -0.496 |
| O16 | O | 0.9801 | 0.7239 | 0.6306 | 0.01267 | Uiso | 1 | -0.375 |
| O17 | O | 0.3364 | 0.9443 | 0.7191 | 0.01267 | Uiso | 1 | -0.517 |
| O18 | O | 0.4034 | 0.1095 | 0.7791 | 0.01267 | Uiso | 1 | -0.528 |

|     |   |         |         |         |         |      |   |        |
|-----|---|---------|---------|---------|---------|------|---|--------|
| O19 | O | 0.0583  | 0.6926  | 0.0179  | 0.01267 | Uiso | 1 | -0.503 |
| O20 | O | 0.9986  | 0.5949  | 0.0797  | 0.01267 | Uiso | 1 | -0.573 |
| O21 | O | 0.1534  | 0.2595  | 0.3653  | 0.01267 | Uiso | 1 | -0.496 |
| O22 | O | 0.0933  | 0.3495  | 0.3694  | 0.01267 | Uiso | 1 | -0.376 |
| O23 | O | 0.2252  | 0.6173  | 0.2809  | 0.01267 | Uiso | 1 | -0.518 |
| O24 | O | 0.3304  | 0.6243  | 0.2209  | 0.01267 | Uiso | 1 | -0.522 |
| O25 | O | 0.1926  | 0.5583  | 0.0179  | 0.01267 | Uiso | 1 | -0.503 |
| O26 | O | 0.0949  | 0.4986  | 0.0797  | 0.01267 | Uiso | 1 | -0.571 |
| O27 | O | 0.7595  | 0.6534  | 0.3653  | 0.01267 | Uiso | 1 | -0.499 |
| O28 | O | 0.8495  | 0.5933  | 0.3694  | 0.01267 | Uiso | 1 | -0.377 |
| O29 | O | 0.1173  | 0.7252  | 0.2809  | 0.01267 | Uiso | 1 | -0.511 |
| O30 | O | 0.1243  | 0.8304  | 0.2209  | 0.01267 | Uiso | 1 | -0.527 |
| O31 | O | 0.5404  | 0.1747  | 0.9821  | 0.01267 | Uiso | 1 | -0.503 |
| O32 | O | 0.4189  | 0.0152  | 0.9203  | 0.01267 | Uiso | 1 | -0.571 |
| O33 | O | 0.2881  | 0.3942  | 0.6347  | 0.01267 | Uiso | 1 | -0.501 |
| O34 | O | 0.2239  | 0.4801  | 0.6306  | 0.01267 | Uiso | 1 | -0.372 |
| O35 | O | 0.4443  | 0.8364  | 0.7191  | 0.01267 | Uiso | 1 | -0.515 |
| O36 | O | 0.6095  | 0.9034  | 0.7791  | 0.01267 | Uiso | 1 | -0.526 |
| O37 | O | 0.5583  | 0.5404  | 0.3657  | 0.01267 | Uiso | 1 | -0.506 |
| O38 | O | 0.4986  | 0.4189  | 0.4037  | 0.01267 | Uiso | 1 | -0.573 |
| O39 | O | 0.6534  | 0.2881  | 0.8939  | 0.01267 | Uiso | 1 | -0.501 |
| O40 | O | 0.5933  | 0.2239  | 0.7438  | 0.01267 | Uiso | 1 | -0.370 |
| O41 | O | 0.7252  | 0.4443  | 0.6079  | 0.01267 | Uiso | 1 | -0.517 |
| O42 | O | 0.8304  | 0.6095  | 0.7061  | 0.01267 | Uiso | 1 | -0.528 |
| O43 | O | 0.1747  | 0.1926  | 0.6343  | 0.01267 | Uiso | 1 | -0.503 |
| O44 | O | 0.0152  | 0.0949  | 0.5963  | 0.01267 | Uiso | 1 | -0.571 |
| O45 | O | 0.3942  | 0.7595  | 0.1061  | 0.01267 | Uiso | 1 | -0.497 |
| O46 | O | 0.4801  | 0.8495  | 0.2562  | 0.01267 | Uiso | 1 | -0.378 |
| O47 | O | 0.8364  | 0.1173  | 0.3921  | 0.01267 | Uiso | 1 | -0.520 |
| O48 | O | 0.9034  | 0.1243  | 0.2939  | 0.01267 | Uiso | 1 | -0.523 |
| O49 | O | 0.05109 | 0.23111 | 0.5     | 0.01267 | Uiso | 1 | -0.622 |
| O50 | O | 0.73111 | 0.55109 | 0.5     | 0.01267 | Uiso | 1 | -0.624 |
| O51 | O | 0.55109 | 0.05109 | 0.81998 | 0.01267 | Uiso | 1 | -0.624 |
| O52 | O | 0.23111 | 0.73111 | 0.18002 | 0.01267 | Uiso | 1 | -0.625 |

```

data_ADASOP_clean
_audit_creation_date      2014-07-02
_audit_creation_method    'Materials Studio'
_symmetry_space_group_name_H-M  'P1'
_symmetry_Int_Tables_number  1
_symmetry_cell_setting    triclinic
loop_
_symmetry_equiv_pos_as_xyz
  x,y,z
_cell_length_a            29.3026
_cell_length_b            29.3026
_cell_length_c            29.3847
_cell_angle_alpha        60.0923
_cell_angle_beta         60.0923
_cell_angle_gamma        89.9999
loop_
_atom_site_label
_atom_site_type_symbol
_atom_site_fract_x
_atom_site_fract_y
_atom_site_fract_z
_atom_site_U_iso_or_equiv
_atom_site_adp_type
_atom_site_occupancy
_atom_site_charge
Zn1  Zn  0.00947  0.74402  0.26718  0.01267  Uiso  1  1.053
Zn2  Zn  0.64498  0.61847  0.3684 0.01267  Uiso  1  1.065
Zn3  Zn  0.72335  0.9888 0.26718  0.01267  Uiso  1  1.075
Zn4  Zn  0.98662  0.01313  0.3684 0.01267  Uiso  1  1.066
Zn5  Zn  0.74402  0.72335  0.26718  0.01267  Uiso  1  1.071
Zn6  Zn  0.61847  0.98662  0.3684 0.01267  Uiso  1  1.066
Zn7  Zn  0.9888 0.00947  0.26718  0.01267  Uiso  1  1.071
Zn8  Zn  0.01313  0.64498  0.3684 0.01267  Uiso  1  1.067
Zn9  Zn  0.99053  0.25598  0.73282  0.01267  Uiso  1  1.053
Zn10 Zn  0.35502  0.38153  0.6316 0.01267  Uiso  1  1.065
Zn11 Zn  0.27665  0.0112 0.73282  0.01267  Uiso  1  1.075
Zn12 Zn  0.01338  0.98687  0.6316 0.01267  Uiso  1  1.066
Zn13 Zn  0.25598  0.27665  0.73282  0.01267  Uiso  1  1.071
Zn14 Zn  0.38153  0.01338  0.6316 0.01267  Uiso  1  1.066
Zn15 Zn  0.0112 0.99053  0.73282  0.01267  Uiso  1  1.071
Zn16 Zn  0.98687  0.35502  0.6316 0.01267  Uiso  1  1.067
Zn17 Zn  0.26529  0.02006  1  0.01267  Uiso  1  0.716
Zn18 Zn  0.63265  0.97455  1  0.01267  Uiso  1  0.508
Zn19 Zn  0.73471  0.97994  0  0.01267  Uiso  1  0.713
Zn20 Zn  0.36735  0.02545  0  0.01267  Uiso  1  0.507
Zn21 Zn  0.02006  0.73471  1  0.01267  Uiso  1  0.573
Zn22 Zn  0.97455  0.36735  1  0.01267  Uiso  1  0.534
Zn23 Zn  0.97994  0.26529  0  0.01267  Uiso  1  0.572
Zn24 Zn  0.02545  0.63265  0  0.01267  Uiso  1  0.534
H1   H   0.18  0.85  0.1504 0.01267  Uiso  1  0.133
H2   H   0.3223 0.8481 0.1412 0.01267  Uiso  1  0.152
H3   H   0.1877 0.704 0.2682 0.01267  Uiso  1  0.140

```

|     |   |        |        |        |         |      |   |       |
|-----|---|--------|--------|--------|---------|------|---|-------|
| H4  | H | 0.2599 | 0.6688 | 0.262  | 0.01267 | Uiso | 1 | 0.097 |
| H5  | H | 0.2352 | 0.681  | 0.3158 | 0.01267 | Uiso | 1 | 0.095 |
| H6  | H | 0.6823 | 0.8068 | 0.1574 | 0.01267 | Uiso | 1 | 0.133 |
| H7  | H | 0.5503 | 0.6654 | 0.2836 | 0.01267 | Uiso | 1 | 0.148 |
| H8  | H | 0.5544 | 0.8009 | 0.1402 | 0.01267 | Uiso | 1 | 0.133 |
| H9  | H | 0.4807 | 0.7394 | 0.1732 | 0.01267 | Uiso | 1 | 0.099 |
| H10 | H | 0.46   | 0.7567 | 0.2226 | 0.01267 | Uiso | 1 | 0.104 |
| H11 | H | 0.1572 | 0.3261 | 0.6552 | 0.01267 | Uiso | 1 | 0.126 |
| H12 | H | 0.1658 | 0.4494 | 0.505  | 0.01267 | Uiso | 1 | 0.142 |
| H13 | H | 0.2973 | 0.4588 | 0.5148 | 0.01267 | Uiso | 1 | 0.133 |
| H14 | H | 0.2574 | 0.593  | 0.3704 | 0.01267 | Uiso | 1 | 0.130 |
| H15 | H | 0.3423 | 0.5235 | 0.3966 | 0.01267 | Uiso | 1 | 0.093 |
| H16 | H | 0.3189 | 0.5458 | 0.4412 | 0.01267 | Uiso | 1 | 0.092 |
| H17 | H | 0.3776 | 0.7396 | 0.2126 | 0.01267 | Uiso | 1 | 0.128 |
| H18 | H | 0.4119 | 0.623  | 0.3266 | 0.01267 | Uiso | 1 | 0.125 |
| H19 | H | 0.6696 | 0.9996 | 0.1504 | 0.01267 | Uiso | 1 | 0.135 |
| H20 | H | 0.5365 | 0.0107 | 0.1412 | 0.01267 | Uiso | 1 | 0.155 |
| H21 | H | 0.5441 | 0.0278 | 0.2682 | 0.01267 | Uiso | 1 | 0.143 |
| H22 | H | 0.4781 | 0.0692 | 0.262  | 0.01267 | Uiso | 1 | 0.098 |
| H23 | H | 0.449  | 0.0032 | 0.3158 | 0.01267 | Uiso | 1 | 0.096 |
| H24 | H | 0.1603 | 0.0358 | 0.1574 | 0.01267 | Uiso | 1 | 0.132 |
| H25 | H | 0.1661 | 0.051  | 0.2836 | 0.01267 | Uiso | 1 | 0.148 |
| H26 | H | 0.3054 | 0.0589 | 0.1402 | 0.01267 | Uiso | 1 | 0.137 |
| H27 | H | 0.3461 | 0.0874 | 0.1732 | 0.01267 | Uiso | 1 | 0.107 |
| H28 | H | 0.3174 | 0.0207 | 0.2226 | 0.01267 | Uiso | 1 | 0.105 |
| H29 | H | 0.1876 | 0.0187 | 0.6552 | 0.01267 | Uiso | 1 | 0.127 |
| H30 | H | 0.3292 | 0.0456 | 0.505  | 0.01267 | Uiso | 1 | 0.142 |
| H31 | H | 0.1879 | 0.0264 | 0.5148 | 0.01267 | Uiso | 1 | 0.134 |
| H32 | H | 0.3722 | 0.0366 | 0.3704 | 0.01267 | Uiso | 1 | 0.130 |
| H33 | H | 0.2611 | 0.0799 | 0.3966 | 0.01267 | Uiso | 1 | 0.094 |
| H34 | H | 0.2399 | 0.013  | 0.4412 | 0.01267 | Uiso | 1 | 0.093 |
| H35 | H | 0.4098 | 0.0478 | 0.2126 | 0.01267 | Uiso | 1 | 0.131 |
| H36 | H | 0.2615 | 0.0504 | 0.3266 | 0.01267 | Uiso | 1 | 0.125 |
| H37 | H | 0.85   | 0.6696 | 0.1504 | 0.01267 | Uiso | 1 | 0.131 |
| H38 | H | 0.8481 | 0.5365 | 0.1412 | 0.01267 | Uiso | 1 | 0.150 |
| H39 | H | 0.704  | 0.5441 | 0.2682 | 0.01267 | Uiso | 1 | 0.141 |
| H40 | H | 0.6688 | 0.4781 | 0.262  | 0.01267 | Uiso | 1 | 0.097 |
| H41 | H | 0.681  | 0.449  | 0.3158 | 0.01267 | Uiso | 1 | 0.095 |
| H42 | H | 0.8068 | 0.1603 | 0.1574 | 0.01267 | Uiso | 1 | 0.134 |
| H43 | H | 0.6654 | 0.1661 | 0.2836 | 0.01267 | Uiso | 1 | 0.148 |
| H44 | H | 0.8009 | 0.3054 | 0.1402 | 0.01267 | Uiso | 1 | 0.131 |
| H45 | H | 0.7394 | 0.3461 | 0.1732 | 0.01267 | Uiso | 1 | 0.099 |
| H46 | H | 0.7567 | 0.3174 | 0.2226 | 0.01267 | Uiso | 1 | 0.101 |
| H47 | H | 0.3261 | 0.1876 | 0.6552 | 0.01267 | Uiso | 1 | 0.128 |
| H48 | H | 0.4494 | 0.3292 | 0.505  | 0.01267 | Uiso | 1 | 0.143 |
| H49 | H | 0.4588 | 0.1879 | 0.5148 | 0.01267 | Uiso | 1 | 0.132 |
| H50 | H | 0.593  | 0.3722 | 0.3704 | 0.01267 | Uiso | 1 | 0.130 |
| H51 | H | 0.5235 | 0.2611 | 0.3966 | 0.01267 | Uiso | 1 | 0.094 |
| H52 | H | 0.5458 | 0.2399 | 0.4412 | 0.01267 | Uiso | 1 | 0.092 |
| H53 | H | 0.7396 | 0.4098 | 0.2126 | 0.01267 | Uiso | 1 | 0.127 |
| H54 | H | 0.623  | 0.2615 | 0.3266 | 0.01267 | Uiso | 1 | 0.125 |
| H55 | H | 0.9996 | 0.18   | 0.1504 | 0.01267 | Uiso | 1 | 0.133 |

|      |   |        |        |        |         |      |   |       |
|------|---|--------|--------|--------|---------|------|---|-------|
| H56  | H | 0.0107 | 0.3223 | 0.1412 | 0.01267 | Uiso | 1 | 0.105 |
| H57  | H | 0.0278 | 0.1877 | 0.2682 | 0.01267 | Uiso | 1 | 0.140 |
| H58  | H | 0.0692 | 0.2599 | 0.262  | 0.01267 | Uiso | 1 | 0.099 |
| H59  | H | 0.0032 | 0.2352 | 0.3158 | 0.01267 | Uiso | 1 | 0.096 |
| H60  | H | 0.0358 | 0.6823 | 0.1574 | 0.01267 | Uiso | 1 | 0.074 |
| H61  | H | 0.051  | 0.5503 | 0.2836 | 0.01267 | Uiso | 1 | 0.150 |
| H62  | H | 0.0589 | 0.5544 | 0.1402 | 0.01267 | Uiso | 1 | 0.135 |
| H63  | H | 0.0874 | 0.4807 | 0.1732 | 0.01267 | Uiso | 1 | 0.099 |
| H64  | H | 0.0207 | 0.46   | 0.2226 | 0.01267 | Uiso | 1 | 0.103 |
| H65  | H | 0.0187 | 0.1572 | 0.6552 | 0.01267 | Uiso | 1 | 0.127 |
| H66  | H | 0.0456 | 0.1658 | 0.505  | 0.01267 | Uiso | 1 | 0.141 |
| H67  | H | 0.0264 | 0.2973 | 0.5148 | 0.01267 | Uiso | 1 | 0.134 |
| H68  | H | 0.0366 | 0.2574 | 0.3704 | 0.01267 | Uiso | 1 | 0.130 |
| H69  | H | 0.0799 | 0.3423 | 0.3966 | 0.01267 | Uiso | 1 | 0.094 |
| H70  | H | 0.013  | 0.3189 | 0.4412 | 0.01267 | Uiso | 1 | 0.093 |
| H71  | H | 0.0478 | 0.3776 | 0.2126 | 0.01267 | Uiso | 1 | 0.126 |
| H72  | H | 0.0504 | 0.4119 | 0.3266 | 0.01267 | Uiso | 1 | 0.126 |
| H73  | H | 0.82   | 0.15   | 0.8496 | 0.01267 | Uiso | 1 | 0.133 |
| H74  | H | 0.6777 | 0.1519 | 0.8588 | 0.01267 | Uiso | 1 | 0.153 |
| H75  | H | 0.8123 | 0.296  | 0.7318 | 0.01267 | Uiso | 1 | 0.139 |
| H76  | H | 0.7401 | 0.3312 | 0.738  | 0.01267 | Uiso | 1 | 0.097 |
| H77  | H | 0.7648 | 0.319  | 0.6842 | 0.01267 | Uiso | 1 | 0.095 |
| H78  | H | 0.3177 | 0.1932 | 0.8426 | 0.01267 | Uiso | 1 | 0.133 |
| H79  | H | 0.4497 | 0.3346 | 0.7164 | 0.01267 | Uiso | 1 | 0.147 |
| H80  | H | 0.4456 | 0.1991 | 0.8598 | 0.01267 | Uiso | 1 | 0.133 |
| H81  | H | 0.5193 | 0.2606 | 0.8268 | 0.01267 | Uiso | 1 | 0.098 |
| H82  | H | 0.54   | 0.2433 | 0.7774 | 0.01267 | Uiso | 1 | 0.104 |
| H83  | H | 0.8428 | 0.6739 | 0.3448 | 0.01267 | Uiso | 1 | 0.126 |
| H84  | H | 0.8342 | 0.5506 | 0.495  | 0.01267 | Uiso | 1 | 0.143 |
| H85  | H | 0.7027 | 0.5412 | 0.4852 | 0.01267 | Uiso | 1 | 0.133 |
| H86  | H | 0.7426 | 0.407  | 0.6296 | 0.01267 | Uiso | 1 | 0.130 |
| H87  | H | 0.6577 | 0.4765 | 0.6034 | 0.01267 | Uiso | 1 | 0.092 |
| H88  | H | 0.6811 | 0.4542 | 0.5588 | 0.01267 | Uiso | 1 | 0.091 |
| H89  | H | 0.6224 | 0.2604 | 0.7874 | 0.01267 | Uiso | 1 | 0.129 |
| H90  | H | 0.5881 | 0.377  | 0.6734 | 0.01267 | Uiso | 1 | 0.125 |
| H91  | H | 0.3304 | 0.0004 | 0.8496 | 0.01267 | Uiso | 1 | 0.135 |
| H92  | H | 0.4635 | 0.9893 | 0.8588 | 0.01267 | Uiso | 1 | 0.155 |
| H93  | H | 0.4559 | 0.9722 | 0.7318 | 0.01267 | Uiso | 1 | 0.143 |
| H94  | H | 0.5219 | 0.9308 | 0.738  | 0.01267 | Uiso | 1 | 0.098 |
| H95  | H | 0.551  | 0.9968 | 0.6842 | 0.01267 | Uiso | 1 | 0.096 |
| H96  | H | 0.8397 | 0.9642 | 0.8426 | 0.01267 | Uiso | 1 | 0.131 |
| H97  | H | 0.8339 | 0.949  | 0.7164 | 0.01267 | Uiso | 1 | 0.147 |
| H98  | H | 0.6946 | 0.9411 | 0.8598 | 0.01267 | Uiso | 1 | 0.137 |
| H99  | H | 0.6539 | 0.9126 | 0.8268 | 0.01267 | Uiso | 1 | 0.107 |
| H100 | H | 0.6826 | 0.9793 | 0.7774 | 0.01267 | Uiso | 1 | 0.105 |
| H101 | H | 0.8124 | 0.9813 | 0.3448 | 0.01267 | Uiso | 1 | 0.128 |
| H102 | H | 0.6708 | 0.9544 | 0.495  | 0.01267 | Uiso | 1 | 0.142 |
| H103 | H | 0.8121 | 0.9736 | 0.4852 | 0.01267 | Uiso | 1 | 0.133 |
| H104 | H | 0.6278 | 0.9634 | 0.6296 | 0.01267 | Uiso | 1 | 0.130 |
| H105 | H | 0.7389 | 0.9201 | 0.6034 | 0.01267 | Uiso | 1 | 0.093 |
| H106 | H | 0.7601 | 0.987  | 0.5588 | 0.01267 | Uiso | 1 | 0.092 |
| H107 | H | 0.5902 | 0.9522 | 0.7874 | 0.01267 | Uiso | 1 | 0.130 |

|      |   |        |        |        |         |      |   |        |
|------|---|--------|--------|--------|---------|------|---|--------|
| H108 | H | 0.7385 | 0.9496 | 0.6734 | 0.01267 | Uiso | 1 | 0.125  |
| H109 | H | 0.15   | 0.3304 | 0.8496 | 0.01267 | Uiso | 1 | 0.130  |
| H110 | H | 0.1519 | 0.4635 | 0.8588 | 0.01267 | Uiso | 1 | 0.150  |
| H111 | H | 0.296  | 0.4559 | 0.7318 | 0.01267 | Uiso | 1 | 0.140  |
| H112 | H | 0.3312 | 0.5219 | 0.738  | 0.01267 | Uiso | 1 | 0.098  |
| H113 | H | 0.319  | 0.551  | 0.6842 | 0.01267 | Uiso | 1 | 0.096  |
| H114 | H | 0.1932 | 0.8397 | 0.8426 | 0.01267 | Uiso | 1 | 0.133  |
| H115 | H | 0.3346 | 0.8339 | 0.7164 | 0.01267 | Uiso | 1 | 0.148  |
| H116 | H | 0.1991 | 0.6946 | 0.8598 | 0.01267 | Uiso | 1 | 0.132  |
| H117 | H | 0.2606 | 0.6539 | 0.8268 | 0.01267 | Uiso | 1 | 0.098  |
| H118 | H | 0.2433 | 0.6826 | 0.7774 | 0.01267 | Uiso | 1 | 0.101  |
| H119 | H | 0.6739 | 0.8124 | 0.3448 | 0.01267 | Uiso | 1 | 0.128  |
| H120 | H | 0.5506 | 0.6708 | 0.495  | 0.01267 | Uiso | 1 | 0.143  |
| H121 | H | 0.5412 | 0.8121 | 0.4852 | 0.01267 | Uiso | 1 | 0.132  |
| H122 | H | 0.407  | 0.6278 | 0.6296 | 0.01267 | Uiso | 1 | 0.131  |
| H123 | H | 0.4765 | 0.7389 | 0.6034 | 0.01267 | Uiso | 1 | 0.093  |
| H124 | H | 0.4542 | 0.7601 | 0.5588 | 0.01267 | Uiso | 1 | 0.092  |
| H125 | H | 0.2604 | 0.5902 | 0.7874 | 0.01267 | Uiso | 1 | 0.127  |
| H126 | H | 0.377  | 0.7385 | 0.6734 | 0.01267 | Uiso | 1 | 0.125  |
| H127 | H | 0.0004 | 0.82   | 0.8496 | 0.01267 | Uiso | 1 | 0.135  |
| H128 | H | 0.9893 | 0.6777 | 0.8588 | 0.01267 | Uiso | 1 | 0.103  |
| H129 | H | 0.9722 | 0.8123 | 0.7318 | 0.01267 | Uiso | 1 | 0.140  |
| H130 | H | 0.9308 | 0.7401 | 0.738  | 0.01267 | Uiso | 1 | 0.098  |
| H131 | H | 0.9968 | 0.7648 | 0.6842 | 0.01267 | Uiso | 1 | 0.096  |
| H132 | H | 0.9642 | 0.3177 | 0.8426 | 0.01267 | Uiso | 1 | 0.074  |
| H133 | H | 0.949  | 0.4497 | 0.7164 | 0.01267 | Uiso | 1 | 0.150  |
| H134 | H | 0.9411 | 0.4456 | 0.8598 | 0.01267 | Uiso | 1 | 0.135  |
| H135 | H | 0.9126 | 0.5193 | 0.8268 | 0.01267 | Uiso | 1 | 0.098  |
| H136 | H | 0.9793 | 0.54   | 0.7774 | 0.01267 | Uiso | 1 | 0.103  |
| H137 | H | 0.9813 | 0.8428 | 0.3448 | 0.01267 | Uiso | 1 | 0.127  |
| H138 | H | 0.9544 | 0.8342 | 0.495  | 0.01267 | Uiso | 1 | 0.143  |
| H139 | H | 0.9736 | 0.7027 | 0.4852 | 0.01267 | Uiso | 1 | 0.133  |
| H140 | H | 0.9634 | 0.7426 | 0.6296 | 0.01267 | Uiso | 1 | 0.130  |
| H141 | H | 0.9201 | 0.6577 | 0.6034 | 0.01267 | Uiso | 1 | 0.094  |
| H142 | H | 0.987  | 0.6811 | 0.5588 | 0.01267 | Uiso | 1 | 0.092  |
| H143 | H | 0.9522 | 0.6224 | 0.7874 | 0.01267 | Uiso | 1 | 0.126  |
| H144 | H | 0.9496 | 0.5881 | 0.6734 | 0.01267 | Uiso | 1 | 0.126  |
| C1   | C | 0.1136 | 0.7467 | 0.2528 | 0.01267 | Uiso | 1 | 0.623  |
| C2   | C | 0.1742 | 0.7745 | 0.2186 | 0.01267 | Uiso | 1 | 0.002  |
| C3   | C | 0.2001 | 0.8306 | 0.1666 | 0.01267 | Uiso | 1 | -0.154 |
| C4   | C | 0.2556 | 0.8588 | 0.138  | 0.01267 | Uiso | 1 | -0.015 |
| C5   | C | 0.2801 | 0.919  | 0.0876 | 0.01267 | Uiso | 1 | 0.528  |
| C6   | C | 0.2844 | 0.8303 | 0.1606 | 0.01267 | Uiso | 1 | -0.220 |
| C7   | C | 0.2565 | 0.7733 | 0.214  | 0.01267 | Uiso | 1 | 0.247  |
| C8   | C | 0.2028 | 0.7435 | 0.239  | 0.01267 | Uiso | 1 | -0.254 |
| C9   | C | 0.2697 | 0.689  | 0.2764 | 0.01267 | Uiso | 1 | -0.057 |
| C10  | C | 0.6467 | 0.8723 | 0.0908 | 0.01267 | Uiso | 1 | 0.502  |
| C11  | C | 0.6223 | 0.8137 | 0.1418 | 0.01267 | Uiso | 1 | -0.004 |
| C12  | C | 0.6465 | 0.7873 | 0.1728 | 0.01267 | Uiso | 1 | -0.156 |
| C13  | C | 0.6197 | 0.7329 | 0.2258 | 0.01267 | Uiso | 1 | -0.003 |
| C14  | C | 0.6455 | 0.706  | 0.26   | 0.01267 | Uiso | 1 | 0.616  |
| C15  | C | 0.5684 | 0.7032 | 0.2476 | 0.01267 | Uiso | 1 | -0.215 |

|     |   |        |        |        |         |      |   |        |
|-----|---|--------|--------|--------|---------|------|---|--------|
| C16 | C | 0.544  | 0.7296 | 0.2158 | 0.01267 | Uiso | 1 | 0.257  |
| C17 | C | 0.5707 | 0.7837 | 0.1628 | 0.01267 | Uiso | 1 | -0.259 |
| C18 | C | 0.4625 | 0.7249 | 0.2188 | 0.01267 | Uiso | 1 | -0.058 |
| C19 | C | 0.257  | 0.3643 | 0.625  | 0.01267 | Uiso | 1 | 0.616  |
| C20 | C | 0.2294 | 0.3888 | 0.5926 | 0.01267 | Uiso | 1 | 0.003  |
| C21 | C | 0.1764 | 0.3627 | 0.6168 | 0.01267 | Uiso | 1 | -0.139 |
| C22 | C | 0.1501 | 0.3859 | 0.5892 | 0.01267 | Uiso | 1 | 0.003  |
| C23 | C | 0.0913 | 0.3576 | 0.6168 | 0.01267 | Uiso | 1 | 0.629  |
| C24 | C | 0.1814 | 0.4345 | 0.5288 | 0.01267 | Uiso | 1 | -0.212 |
| C25 | C | 0.2354 | 0.4621 | 0.5018 | 0.01267 | Uiso | 1 | 0.256  |
| C26 | C | 0.26   | 0.4398 | 0.5332 | 0.01267 | Uiso | 1 | -0.250 |
| C27 | C | 0.3351 | 0.6012 | 0.352  | 0.01267 | Uiso | 1 | 0.132  |
| C28 | C | 0.2949 | 0.6174 | 0.342  | 0.01267 | Uiso | 1 | -0.245 |
| C29 | C | 0.3166 | 0.5431 | 0.41   | 0.01267 | Uiso | 1 | -0.058 |
| C30 | C | 0.3666 | 0.7031 | 0.2486 | 0.01267 | Uiso | 1 | -0.250 |
| C31 | C | 0.4049 | 0.6839 | 0.2596 | 0.01267 | Uiso | 1 | 0.129  |
| C32 | C | 0.3869 | 0.6341 | 0.3148 | 0.01267 | Uiso | 1 | -0.244 |
| C33 | C | 0.3105 | 0.6684 | 0.2914 | 0.01267 | Uiso | 1 | 0.128  |
| C34 | C | 0.6336 | 0.0005 | 0.2528 | 0.01267 | Uiso | 1 | 0.614  |
| C35 | C | 0.6072 | 0.0069 | 0.2186 | 0.01267 | Uiso | 1 | 0.022  |
| C36 | C | 0.6333 | 0.0028 | 0.1666 | 0.01267 | Uiso | 1 | -0.111 |
| C37 | C | 0.6064 | 0.0032 | 0.138  | 0.01267 | Uiso | 1 | -0.394 |
| C38 | C | 0.6323 | 0.9934 | 0.0876 | 0.01267 | Uiso | 1 | 1.349  |
| C39 | C | 0.555  | 0.0091 | 0.1606 | 0.01267 | Uiso | 1 | -0.139 |
| C40 | C | 0.5295 | 0.0127 | 0.214  | 0.01267 | Uiso | 1 | 0.259  |
| C41 | C | 0.5582 | 0.0175 | 0.239  | 0.01267 | Uiso | 1 | -0.234 |
| C42 | C | 0.4539 | 0.0346 | 0.2764 | 0.01267 | Uiso | 1 | -0.055 |
| C43 | C | 0.2625 | 0.0369 | 0.0908 | 0.01267 | Uiso | 1 | 0.943  |
| C44 | C | 0.2359 | 0.0445 | 0.1418 | 0.01267 | Uiso | 1 | -0.345 |
| C45 | C | 0.1807 | 0.0399 | 0.1728 | 0.01267 | Uiso | 1 | -0.070 |
| C46 | C | 0.1545 | 0.0413 | 0.2258 | 0.01267 | Uiso | 1 | 0.002  |
| C47 | C | 0.0945 | 0.034  | 0.26   | 0.01267 | Uiso | 1 | 0.615  |
| C48 | C | 0.184  | 0.0492 | 0.2476 | 0.01267 | Uiso | 1 | -0.208 |
| C49 | C | 0.2402 | 0.0546 | 0.2158 | 0.01267 | Uiso | 1 | 0.273  |
| C50 | C | 0.2665 | 0.0535 | 0.1628 | 0.01267 | Uiso | 1 | -0.225 |
| C51 | C | 0.3187 | 0.0563 | 0.2188 | 0.01267 | Uiso | 1 | -0.057 |
| C52 | C | 0.118  | 0.0107 | 0.625  | 0.01267 | Uiso | 1 | 0.616  |
| C53 | C | 0.178  | 0.0186 | 0.5926 | 0.01267 | Uiso | 1 | 0.003  |
| C54 | C | 0.2068 | 0.0205 | 0.6168 | 0.01267 | Uiso | 1 | -0.135 |
| C55 | C | 0.2607 | 0.0249 | 0.5892 | 0.01267 | Uiso | 1 | 0.003  |
| C56 | C | 0.2919 | 0.0256 | 0.6168 | 0.01267 | Uiso | 1 | 0.631  |
| C57 | C | 0.2898 | 0.0367 | 0.5288 | 0.01267 | Uiso | 1 | -0.210 |
| C58 | C | 0.2628 | 0.0361 | 0.5018 | 0.01267 | Uiso | 1 | 0.255  |
| C59 | C | 0.2068 | 0.027  | 0.5332 | 0.01267 | Uiso | 1 | -0.254 |
| C60 | C | 0.3129 | 0.0468 | 0.352  | 0.01267 | Uiso | 1 | 0.135  |
| C61 | C | 0.3631 | 0.0406 | 0.342  | 0.01267 | Uiso | 1 | -0.244 |
| C62 | C | 0.2734 | 0.0469 | 0.41   | 0.01267 | Uiso | 1 | -0.062 |
| C63 | C | 0.3848 | 0.0483 | 0.2486 | 0.01267 | Uiso | 1 | -0.250 |
| C64 | C | 0.3355 | 0.0565 | 0.2596 | 0.01267 | Uiso | 1 | 0.130  |
| C65 | C | 0.2983 | 0.0511 | 0.3148 | 0.01267 | Uiso | 1 | -0.243 |
| C66 | C | 0.3981 | 0.0402 | 0.2914 | 0.01267 | Uiso | 1 | 0.126  |
| C67 | C | 0.7467 | 0.6336 | 0.2528 | 0.01267 | Uiso | 1 | 0.620  |

|      |   |        |        |        |         |      |   |        |
|------|---|--------|--------|--------|---------|------|---|--------|
| C68  | C | 0.7745 | 0.6072 | 0.2186 | 0.01267 | Uiso | 1 | 0.007  |
| C69  | C | 0.8306 | 0.6333 | 0.1666 | 0.01267 | Uiso | 1 | -0.158 |
| C70  | C | 0.8588 | 0.6064 | 0.138  | 0.01267 | Uiso | 1 | -0.013 |
| C71  | C | 0.919  | 0.6323 | 0.0876 | 0.01267 | Uiso | 1 | 0.559  |
| C72  | C | 0.8303 | 0.555  | 0.1606 | 0.01267 | Uiso | 1 | -0.211 |
| C73  | C | 0.7733 | 0.5295 | 0.214  | 0.01267 | Uiso | 1 | 0.248  |
| C74  | C | 0.7435 | 0.5582 | 0.239  | 0.01267 | Uiso | 1 | -0.252 |
| C75  | C | 0.689  | 0.4539 | 0.2764 | 0.01267 | Uiso | 1 | -0.054 |
| C76  | C | 0.8723 | 0.2625 | 0.0908 | 0.01267 | Uiso | 1 | 0.550  |
| C77  | C | 0.8137 | 0.2359 | 0.1418 | 0.01267 | Uiso | 1 | 0.002  |
| C78  | C | 0.7873 | 0.1807 | 0.1728 | 0.01267 | Uiso | 1 | -0.141 |
| C79  | C | 0.7329 | 0.1545 | 0.2258 | 0.01267 | Uiso | 1 | -0.002 |
| C80  | C | 0.706  | 0.0945 | 0.26   | 0.01267 | Uiso | 1 | 0.616  |
| C81  | C | 0.7032 | 0.184  | 0.2476 | 0.01267 | Uiso | 1 | -0.215 |
| C82  | C | 0.7296 | 0.2402 | 0.2158 | 0.01267 | Uiso | 1 | 0.260  |
| C83  | C | 0.7837 | 0.2665 | 0.1628 | 0.01267 | Uiso | 1 | -0.263 |
| C84  | C | 0.7249 | 0.3187 | 0.2188 | 0.01267 | Uiso | 1 | -0.057 |
| C85  | C | 0.3643 | 0.118  | 0.625  | 0.01267 | Uiso | 1 | 0.616  |
| C86  | C | 0.3888 | 0.178  | 0.5926 | 0.01267 | Uiso | 1 | 0.001  |
| C87  | C | 0.3627 | 0.2068 | 0.6168 | 0.01267 | Uiso | 1 | -0.138 |
| C88  | C | 0.3859 | 0.2607 | 0.5892 | 0.01267 | Uiso | 1 | 0.004  |
| C89  | C | 0.3576 | 0.2919 | 0.6168 | 0.01267 | Uiso | 1 | 0.629  |
| C90  | C | 0.4345 | 0.2898 | 0.5288 | 0.01267 | Uiso | 1 | -0.211 |
| C91  | C | 0.4621 | 0.2628 | 0.5018 | 0.01267 | Uiso | 1 | 0.255  |
| C92  | C | 0.4398 | 0.2068 | 0.5332 | 0.01267 | Uiso | 1 | -0.252 |
| C93  | C | 0.6012 | 0.3129 | 0.352  | 0.01267 | Uiso | 1 | 0.133  |
| C94  | C | 0.6174 | 0.3631 | 0.342  | 0.01267 | Uiso | 1 | -0.242 |
| C95  | C | 0.5431 | 0.2734 | 0.41   | 0.01267 | Uiso | 1 | -0.061 |
| C96  | C | 0.7031 | 0.3848 | 0.2486 | 0.01267 | Uiso | 1 | -0.250 |
| C97  | C | 0.6839 | 0.3355 | 0.2596 | 0.01267 | Uiso | 1 | 0.127  |
| C98  | C | 0.6341 | 0.2983 | 0.3148 | 0.01267 | Uiso | 1 | -0.244 |
| C99  | C | 0.6684 | 0.3981 | 0.2914 | 0.01267 | Uiso | 1 | 0.126  |
| C100 | C | 0.0005 | 0.1136 | 0.2528 | 0.01267 | Uiso | 1 | 0.621  |
| C101 | C | 0.0069 | 0.1742 | 0.2186 | 0.01267 | Uiso | 1 | 0.010  |
| C102 | C | 0.0028 | 0.2001 | 0.1666 | 0.01267 | Uiso | 1 | -0.157 |
| C103 | C | 0.0032 | 0.2556 | 0.138  | 0.01267 | Uiso | 1 | 0.009  |
| C104 | C | 0.9934 | 0.2801 | 0.0876 | 0.01267 | Uiso | 1 | 0.616  |
| C105 | C | 0.0091 | 0.2844 | 0.1606 | 0.01267 | Uiso | 1 | -0.267 |
| C106 | C | 0.0127 | 0.2565 | 0.214  | 0.01267 | Uiso | 1 | 0.265  |
| C107 | C | 0.0175 | 0.2028 | 0.239  | 0.01267 | Uiso | 1 | -0.260 |
| C108 | C | 0.0346 | 0.2697 | 0.2764 | 0.01267 | Uiso | 1 | -0.055 |
| C109 | C | 0.0369 | 0.6467 | 0.0908 | 0.01267 | Uiso | 1 | 0.608  |
| C110 | C | 0.0445 | 0.6223 | 0.1418 | 0.01267 | Uiso | 1 | 0.019  |
| C111 | C | 0.0399 | 0.6465 | 0.1728 | 0.01267 | Uiso | 1 | -0.186 |
| C112 | C | 0.0413 | 0.6197 | 0.2258 | 0.01267 | Uiso | 1 | 0.020  |
| C113 | C | 0.034  | 0.6455 | 0.26   | 0.01267 | Uiso | 1 | 0.618  |
| C114 | C | 0.0492 | 0.5684 | 0.2476 | 0.01267 | Uiso | 1 | -0.221 |
| C115 | C | 0.0546 | 0.544  | 0.2158 | 0.01267 | Uiso | 1 | 0.267  |
| C116 | C | 0.0535 | 0.5707 | 0.1628 | 0.01267 | Uiso | 1 | -0.257 |
| C117 | C | 0.0563 | 0.4625 | 0.2188 | 0.01267 | Uiso | 1 | -0.058 |
| C118 | C | 0.0107 | 0.257  | 0.625  | 0.01267 | Uiso | 1 | 0.616  |
| C119 | C | 0.0186 | 0.2294 | 0.5926 | 0.01267 | Uiso | 1 | 0.003  |

|      |   |        |        |        |         |      |   |        |
|------|---|--------|--------|--------|---------|------|---|--------|
| C120 | C | 0.0205 | 0.1764 | 0.6168 | 0.01267 | Uiso | 1 | -0.136 |
| C121 | C | 0.0249 | 0.1501 | 0.5892 | 0.01267 | Uiso | 1 | 0.000  |
| C122 | C | 0.0256 | 0.0913 | 0.6168 | 0.01267 | Uiso | 1 | 0.629  |
| C123 | C | 0.0367 | 0.1814 | 0.5288 | 0.01267 | Uiso | 1 | -0.210 |
| C124 | C | 0.0361 | 0.2354 | 0.5018 | 0.01267 | Uiso | 1 | 0.254  |
| C125 | C | 0.027  | 0.26   | 0.5332 | 0.01267 | Uiso | 1 | -0.250 |
| C126 | C | 0.0468 | 0.3351 | 0.352  | 0.01267 | Uiso | 1 | 0.134  |
| C127 | C | 0.0406 | 0.2949 | 0.342  | 0.01267 | Uiso | 1 | -0.244 |
| C128 | C | 0.0469 | 0.3166 | 0.41   | 0.01267 | Uiso | 1 | -0.061 |
| C129 | C | 0.0483 | 0.3666 | 0.2486 | 0.01267 | Uiso | 1 | -0.250 |
| C130 | C | 0.0565 | 0.4049 | 0.2596 | 0.01267 | Uiso | 1 | 0.128  |
| C131 | C | 0.0511 | 0.3869 | 0.3148 | 0.01267 | Uiso | 1 | -0.244 |
| C132 | C | 0.0402 | 0.3105 | 0.2914 | 0.01267 | Uiso | 1 | 0.127  |
| C133 | C | 0.8864 | 0.2533 | 0.7472 | 0.01267 | Uiso | 1 | 0.622  |
| C134 | C | 0.8258 | 0.2255 | 0.7814 | 0.01267 | Uiso | 1 | 0.002  |
| C135 | C | 0.7999 | 0.1694 | 0.8334 | 0.01267 | Uiso | 1 | -0.155 |
| C136 | C | 0.7444 | 0.1412 | 0.862  | 0.01267 | Uiso | 1 | -0.013 |
| C137 | C | 0.7199 | 0.081  | 0.9124 | 0.01267 | Uiso | 1 | 0.527  |
| C138 | C | 0.7156 | 0.1697 | 0.8394 | 0.01267 | Uiso | 1 | -0.222 |
| C139 | C | 0.7435 | 0.2267 | 0.786  | 0.01267 | Uiso | 1 | 0.248  |
| C140 | C | 0.7972 | 0.2565 | 0.761  | 0.01267 | Uiso | 1 | -0.254 |
| C141 | C | 0.7303 | 0.311  | 0.7236 | 0.01267 | Uiso | 1 | -0.055 |
| C142 | C | 0.3533 | 0.1277 | 0.9092 | 0.01267 | Uiso | 1 | 0.503  |
| C143 | C | 0.3777 | 0.1863 | 0.8582 | 0.01267 | Uiso | 1 | -0.006 |
| C144 | C | 0.3535 | 0.2127 | 0.8272 | 0.01267 | Uiso | 1 | -0.156 |
| C145 | C | 0.3803 | 0.2671 | 0.7742 | 0.01267 | Uiso | 1 | -0.003 |
| C146 | C | 0.3545 | 0.294  | 0.74   | 0.01267 | Uiso | 1 | 0.617  |
| C147 | C | 0.4316 | 0.2968 | 0.7524 | 0.01267 | Uiso | 1 | -0.213 |
| C148 | C | 0.456  | 0.2704 | 0.7842 | 0.01267 | Uiso | 1 | 0.257  |
| C149 | C | 0.4293 | 0.2163 | 0.8372 | 0.01267 | Uiso | 1 | -0.256 |
| C150 | C | 0.5375 | 0.2751 | 0.7812 | 0.01267 | Uiso | 1 | -0.056 |
| C151 | C | 0.743  | 0.6357 | 0.375  | 0.01267 | Uiso | 1 | 0.620  |
| C152 | C | 0.7706 | 0.6112 | 0.4074 | 0.01267 | Uiso | 1 | 0.001  |
| C153 | C | 0.8236 | 0.6373 | 0.3832 | 0.01267 | Uiso | 1 | -0.138 |
| C154 | C | 0.8499 | 0.6141 | 0.4108 | 0.01267 | Uiso | 1 | 0.002  |
| C155 | C | 0.9087 | 0.6424 | 0.3832 | 0.01267 | Uiso | 1 | 0.631  |
| C156 | C | 0.8186 | 0.5655 | 0.4712 | 0.01267 | Uiso | 1 | -0.212 |
| C157 | C | 0.7646 | 0.5379 | 0.4982 | 0.01267 | Uiso | 1 | 0.256  |
| C158 | C | 0.74   | 0.5602 | 0.4668 | 0.01267 | Uiso | 1 | -0.249 |
| C159 | C | 0.6649 | 0.3988 | 0.648  | 0.01267 | Uiso | 1 | 0.130  |
| C160 | C | 0.7051 | 0.3826 | 0.658  | 0.01267 | Uiso | 1 | -0.245 |
| C161 | C | 0.6834 | 0.4569 | 0.59   | 0.01267 | Uiso | 1 | -0.055 |
| C162 | C | 0.6334 | 0.2969 | 0.7514 | 0.01267 | Uiso | 1 | -0.251 |
| C163 | C | 0.5951 | 0.3161 | 0.7404 | 0.01267 | Uiso | 1 | 0.127  |
| C164 | C | 0.6131 | 0.3659 | 0.6852 | 0.01267 | Uiso | 1 | -0.243 |
| C165 | C | 0.6895 | 0.3316 | 0.7086 | 0.01267 | Uiso | 1 | 0.127  |
| C166 | C | 0.3664 | 0.9995 | 0.7472 | 0.01267 | Uiso | 1 | 0.614  |
| C167 | C | 0.3928 | 0.9931 | 0.7814 | 0.01267 | Uiso | 1 | 0.023  |
| C168 | C | 0.3667 | 0.9972 | 0.8334 | 0.01267 | Uiso | 1 | -0.112 |
| C169 | C | 0.3936 | 0.9968 | 0.862  | 0.01267 | Uiso | 1 | -0.394 |
| C170 | C | 0.3677 | 0.0066 | 0.9124 | 0.01267 | Uiso | 1 | 1.349  |
| C171 | C | 0.445  | 0.9909 | 0.8394 | 0.01267 | Uiso | 1 | -0.138 |

|      |   |        |        |        |         |      |   |        |
|------|---|--------|--------|--------|---------|------|---|--------|
| C172 | C | 0.4705 | 0.9873 | 0.786  | 0.01267 | Uiso | 1 | 0.257  |
| C173 | C | 0.4418 | 0.9825 | 0.761  | 0.01267 | Uiso | 1 | -0.234 |
| C174 | C | 0.5461 | 0.9654 | 0.7236 | 0.01267 | Uiso | 1 | -0.056 |
| C175 | C | 0.7375 | 0.9631 | 0.9092 | 0.01267 | Uiso | 1 | 0.944  |
| C176 | C | 0.7641 | 0.9555 | 0.8582 | 0.01267 | Uiso | 1 | -0.345 |
| C177 | C | 0.8193 | 0.9601 | 0.8272 | 0.01267 | Uiso | 1 | -0.070 |
| C178 | C | 0.8455 | 0.9587 | 0.7742 | 0.01267 | Uiso | 1 | 0.003  |
| C179 | C | 0.9055 | 0.966  | 0.74   | 0.01267 | Uiso | 1 | 0.614  |
| C180 | C | 0.816  | 0.9508 | 0.7524 | 0.01267 | Uiso | 1 | -0.206 |
| C181 | C | 0.7598 | 0.9454 | 0.7842 | 0.01267 | Uiso | 1 | 0.270  |
| C182 | C | 0.7335 | 0.9465 | 0.8372 | 0.01267 | Uiso | 1 | -0.222 |
| C183 | C | 0.6813 | 0.9437 | 0.7812 | 0.01267 | Uiso | 1 | -0.057 |
| C184 | C | 0.882  | 0.9893 | 0.375  | 0.01267 | Uiso | 1 | 0.619  |
| C185 | C | 0.822  | 0.9814 | 0.4074 | 0.01267 | Uiso | 1 | 0.004  |
| C186 | C | 0.7932 | 0.9795 | 0.3832 | 0.01267 | Uiso | 1 | -0.137 |
| C187 | C | 0.7393 | 0.9751 | 0.4108 | 0.01267 | Uiso | 1 | 0.004  |
| C188 | C | 0.7081 | 0.9744 | 0.3832 | 0.01267 | Uiso | 1 | 0.630  |
| C189 | C | 0.7102 | 0.9633 | 0.4712 | 0.01267 | Uiso | 1 | -0.214 |
| C190 | C | 0.7372 | 0.9639 | 0.4982 | 0.01267 | Uiso | 1 | 0.257  |
| C191 | C | 0.7932 | 0.973  | 0.4668 | 0.01267 | Uiso | 1 | -0.251 |
| C192 | C | 0.6871 | 0.9532 | 0.648  | 0.01267 | Uiso | 1 | 0.135  |
| C193 | C | 0.6369 | 0.9594 | 0.658  | 0.01267 | Uiso | 1 | -0.245 |
| C194 | C | 0.7266 | 0.9531 | 0.59   | 0.01267 | Uiso | 1 | -0.058 |
| C195 | C | 0.6152 | 0.9517 | 0.7514 | 0.01267 | Uiso | 1 | -0.247 |
| C196 | C | 0.6645 | 0.9435 | 0.7404 | 0.01267 | Uiso | 1 | 0.129  |
| C197 | C | 0.7017 | 0.9489 | 0.6852 | 0.01267 | Uiso | 1 | -0.244 |
| C198 | C | 0.6019 | 0.9598 | 0.7086 | 0.01267 | Uiso | 1 | 0.126  |
| C199 | C | 0.2533 | 0.3664 | 0.7472 | 0.01267 | Uiso | 1 | 0.621  |
| C200 | C | 0.2255 | 0.3928 | 0.7814 | 0.01267 | Uiso | 1 | 0.003  |
| C201 | C | 0.1694 | 0.3667 | 0.8334 | 0.01267 | Uiso | 1 | -0.155 |
| C202 | C | 0.1412 | 0.3936 | 0.862  | 0.01267 | Uiso | 1 | -0.013 |
| C203 | C | 0.081  | 0.3677 | 0.9124 | 0.01267 | Uiso | 1 | 0.557  |
| C204 | C | 0.1697 | 0.445  | 0.8394 | 0.01267 | Uiso | 1 | -0.211 |
| C205 | C | 0.2267 | 0.4705 | 0.786  | 0.01267 | Uiso | 1 | 0.247  |
| C206 | C | 0.2565 | 0.4418 | 0.761  | 0.01267 | Uiso | 1 | -0.249 |
| C207 | C | 0.311  | 0.5461 | 0.7236 | 0.01267 | Uiso | 1 | -0.056 |
| C208 | C | 0.1277 | 0.7375 | 0.9092 | 0.01267 | Uiso | 1 | 0.551  |
| C209 | C | 0.1863 | 0.7641 | 0.8582 | 0.01267 | Uiso | 1 | 0.002  |
| C210 | C | 0.2127 | 0.8193 | 0.8272 | 0.01267 | Uiso | 1 | -0.140 |
| C211 | C | 0.2671 | 0.8455 | 0.7742 | 0.01267 | Uiso | 1 | -0.004 |
| C212 | C | 0.294  | 0.9055 | 0.74   | 0.01267 | Uiso | 1 | 0.618  |
| C213 | C | 0.2968 | 0.816  | 0.7524 | 0.01267 | Uiso | 1 | -0.213 |
| C214 | C | 0.2704 | 0.7598 | 0.7842 | 0.01267 | Uiso | 1 | 0.258  |
| C215 | C | 0.2163 | 0.7335 | 0.8372 | 0.01267 | Uiso | 1 | -0.263 |
| C216 | C | 0.2751 | 0.6813 | 0.7812 | 0.01267 | Uiso | 1 | -0.057 |
| C217 | C | 0.6357 | 0.882  | 0.375  | 0.01267 | Uiso | 1 | 0.619  |
| C218 | C | 0.6112 | 0.822  | 0.4074 | 0.01267 | Uiso | 1 | -0.001 |
| C219 | C | 0.6373 | 0.7932 | 0.3832 | 0.01267 | Uiso | 1 | -0.135 |
| C220 | C | 0.6141 | 0.7393 | 0.4108 | 0.01267 | Uiso | 1 | 0.001  |
| C221 | C | 0.6424 | 0.7081 | 0.3832 | 0.01267 | Uiso | 1 | 0.629  |
| C222 | C | 0.5655 | 0.7102 | 0.4712 | 0.01267 | Uiso | 1 | -0.210 |
| C223 | C | 0.5379 | 0.7372 | 0.4982 | 0.01267 | Uiso | 1 | 0.256  |

|      |   |         |         |         |         |      |   |        |
|------|---|---------|---------|---------|---------|------|---|--------|
| C224 | C | 0.5602  | 0.7932  | 0.4668  | 0.01267 | Uiso | 1 | -0.252 |
| C225 | C | 0.3988  | 0.6871  | 0.648   | 0.01267 | Uiso | 1 | 0.134  |
| C226 | C | 0.3826  | 0.6369  | 0.658   | 0.01267 | Uiso | 1 | -0.246 |
| C227 | C | 0.4569  | 0.7266  | 0.59    | 0.01267 | Uiso | 1 | -0.058 |
| C228 | C | 0.2969  | 0.6152  | 0.7514  | 0.01267 | Uiso | 1 | -0.249 |
| C229 | C | 0.3161  | 0.6645  | 0.7404  | 0.01267 | Uiso | 1 | 0.127  |
| C230 | C | 0.3659  | 0.7017  | 0.6852  | 0.01267 | Uiso | 1 | -0.244 |
| C231 | C | 0.3316  | 0.6019  | 0.7086  | 0.01267 | Uiso | 1 | 0.128  |
| C232 | C | 0.9995  | 0.8864  | 0.7472  | 0.01267 | Uiso | 1 | 0.621  |
| C233 | C | 0.9931  | 0.8258  | 0.7814  | 0.01267 | Uiso | 1 | 0.012  |
| C234 | C | 0.9972  | 0.7999  | 0.8334  | 0.01267 | Uiso | 1 | -0.160 |
| C235 | C | 0.9968  | 0.7444  | 0.862   | 0.01267 | Uiso | 1 | 0.009  |
| C236 | C | 0.0066  | 0.7199  | 0.9124  | 0.01267 | Uiso | 1 | 0.617  |
| C237 | C | 0.9909  | 0.7156  | 0.8394  | 0.01267 | Uiso | 1 | -0.264 |
| C238 | C | 0.9873  | 0.7435  | 0.786   | 0.01267 | Uiso | 1 | 0.265  |
| C239 | C | 0.9825  | 0.7972  | 0.761   | 0.01267 | Uiso | 1 | -0.261 |
| C240 | C | 0.9654  | 0.7303  | 0.7236  | 0.01267 | Uiso | 1 | -0.056 |
| C241 | C | 0.9631  | 0.3533  | 0.9092  | 0.01267 | Uiso | 1 | 0.605  |
| C242 | C | 0.9555  | 0.3777  | 0.8582  | 0.01267 | Uiso | 1 | 0.019  |
| C243 | C | 0.9601  | 0.3535  | 0.8272  | 0.01267 | Uiso | 1 | -0.185 |
| C244 | C | 0.9587  | 0.3803  | 0.7742  | 0.01267 | Uiso | 1 | 0.020  |
| C245 | C | 0.966   | 0.3545  | 0.74    | 0.01267 | Uiso | 1 | 0.619  |
| C246 | C | 0.9508  | 0.4316  | 0.7524  | 0.01267 | Uiso | 1 | -0.220 |
| C247 | C | 0.9454  | 0.456   | 0.7842  | 0.01267 | Uiso | 1 | 0.265  |
| C248 | C | 0.9465  | 0.4293  | 0.8372  | 0.01267 | Uiso | 1 | -0.256 |
| C249 | C | 0.9437  | 0.5375  | 0.7812  | 0.01267 | Uiso | 1 | -0.055 |
| C250 | C | 0.9893  | 0.743   | 0.375   | 0.01267 | Uiso | 1 | 0.618  |
| C251 | C | 0.9814  | 0.7706  | 0.4074  | 0.01267 | Uiso | 1 | 0.002  |
| C252 | C | 0.9795  | 0.8236  | 0.3832  | 0.01267 | Uiso | 1 | -0.137 |
| C253 | C | 0.9751  | 0.8499  | 0.4108  | 0.01267 | Uiso | 1 | 0.002  |
| C254 | C | 0.9744  | 0.9087  | 0.3832  | 0.01267 | Uiso | 1 | 0.631  |
| C255 | C | 0.9633  | 0.8186  | 0.4712  | 0.01267 | Uiso | 1 | -0.213 |
| C256 | C | 0.9639  | 0.7646  | 0.4982  | 0.01267 | Uiso | 1 | 0.256  |
| C257 | C | 0.973   | 0.74    | 0.4668  | 0.01267 | Uiso | 1 | -0.249 |
| C258 | C | 0.9532  | 0.6649  | 0.648   | 0.01267 | Uiso | 1 | 0.133  |
| C259 | C | 0.9594  | 0.7051  | 0.658   | 0.01267 | Uiso | 1 | -0.244 |
| C260 | C | 0.9531  | 0.6834  | 0.59    | 0.01267 | Uiso | 1 | -0.059 |
| C261 | C | 0.9517  | 0.6334  | 0.7514  | 0.01267 | Uiso | 1 | -0.250 |
| C262 | C | 0.9435  | 0.5951  | 0.7404  | 0.01267 | Uiso | 1 | 0.125  |
| C263 | C | 0.9489  | 0.6131  | 0.6852  | 0.01267 | Uiso | 1 | -0.243 |
| C264 | C | 0.9598  | 0.6895  | 0.7086  | 0.01267 | Uiso | 1 | 0.127  |
| O1   | O | 0.25392 | 0.94257 | 0.0655  | 0.01267 | Uiso | 1 | -0.462 |
| O2   | O | 0.32954 | 0.94235 | 0.06718 | 0.01267 | Uiso | 1 | -0.450 |
| O3   | O | 0.09001 | 0.77498 | 0.22862 | 0.01267 | Uiso | 1 | -0.550 |
| O4   | O | 0.09153 | 0.69766 | 0.30294 | 0.01267 | Uiso | 1 | -0.593 |
| O5   | O | 0.2921  | 0.7472  | 0.2278  | 0.01267 | Uiso | 1 | -0.202 |
| O6   | O | 0.69288 | 0.73366 | 0.23718 | 0.01267 | Uiso | 1 | -0.572 |
| O7   | O | 0.61578 | 0.6574  | 0.31478 | 0.01267 | Uiso | 1 | -0.597 |
| O8   | O | 0.69537 | 0.89744 | 0.06868 | 0.01267 | Uiso | 1 | -0.408 |
| O9   | O | 0.62103 | 0.89637 | 0.0657  | 0.01267 | Uiso | 1 | -0.513 |
| O10  | O | 0.4936  | 0.6966  | 0.241   | 0.01267 | Uiso | 1 | -0.187 |
| O11  | O | 0.30327 | 0.3922  | 0.60244 | 0.01267 | Uiso | 1 | -0.570 |

|     |   |         |         |         |         |      |   |        |
|-----|---|---------|---------|---------|---------|------|---|--------|
| O12 | O | 0.22769 | 0.31406 | 0.67868 | 0.01267 | Uiso | 1 | -0.597 |
| O13 | O | 0.06763 | 0.31124 | 0.66932 | 0.01267 | Uiso | 1 | -0.580 |
| O14 | O | 0.06883 | 0.38579 | 0.5911  | 0.01267 | Uiso | 1 | -0.566 |
| O15 | O | 0.2617  | 0.512   | 0.44    | 0.01267 | Uiso | 1 | -0.206 |
| O16 | O | 0.68058 | 0.99193 | 0.0655  | 0.01267 | Uiso | 1 | -0.587 |
| O17 | O | 0.60328 | 0.99047 | 0.06718 | 0.01267 | Uiso | 1 | -0.642 |
| O18 | O | 0.68137 | 0.9964  | 0.22862 | 0.01267 | Uiso | 1 | -0.541 |
| O19 | O | 0.60553 | 0.9994  | 0.30294 | 0.01267 | Uiso | 1 | -0.589 |
| O20 | O | 0.4801  | 0.025   | 0.2278  | 0.01267 | Uiso | 1 | -0.194 |
| O21 | O | 0.06994 | 0.02916 | 0.23718 | 0.01267 | Uiso | 1 | -0.572 |
| O22 | O | 0.06944 | 0.02782 | 0.31478 | 0.01267 | Uiso | 1 | -0.592 |
| O23 | O | 0.23595 | 0.03388 | 0.06868 | 0.01267 | Uiso | 1 | -0.546 |
| O24 | O | 0.31327 | 0.03793 | 0.0657  | 0.01267 | Uiso | 1 | -0.535 |
| O25 | O | 0.2654  | 0.0624  | 0.241   | 0.01267 | Uiso | 1 | -0.183 |
| O26 | O | 0.09429 | 0.00536 | 0.60244 | 0.01267 | Uiso | 1 | -0.571 |
| O27 | O | 0.09363 | 0.00726 | 0.67868 | 0.01267 | Uiso | 1 | -0.595 |
| O28 | O | 0.26305 | 0.01944 | 0.66932 | 0.01267 | Uiso | 1 | -0.581 |
| O29 | O | 0.34007 | 0.02311 | 0.5911  | 0.01267 | Uiso | 1 | -0.567 |
| O30 | O | 0.2983  | 0.048   | 0.44    | 0.01267 | Uiso | 1 | -0.205 |
| O31 | O | 0.94257 | 0.68058 | 0.0655  | 0.01267 | Uiso | 1 | -0.335 |
| O32 | O | 0.94235 | 0.60328 | 0.06718 | 0.01267 | Uiso | 1 | -0.509 |
| O33 | O | 0.77498 | 0.68137 | 0.22862 | 0.01267 | Uiso | 1 | -0.554 |
| O34 | O | 0.69766 | 0.60553 | 0.30294 | 0.01267 | Uiso | 1 | -0.592 |
| O35 | O | 0.7472  | 0.4801  | 0.2278  | 0.01267 | Uiso | 1 | -0.203 |
| O36 | O | 0.73366 | 0.06994 | 0.23718 | 0.01267 | Uiso | 1 | -0.571 |
| O37 | O | 0.6574  | 0.06944 | 0.31478 | 0.01267 | Uiso | 1 | -0.597 |
| O38 | O | 0.89744 | 0.23595 | 0.06868 | 0.01267 | Uiso | 1 | -0.497 |
| O39 | O | 0.89637 | 0.31327 | 0.0657  | 0.01267 | Uiso | 1 | -0.384 |
| O40 | O | 0.6966  | 0.2654  | 0.241   | 0.01267 | Uiso | 1 | -0.186 |
| O41 | O | 0.3922  | 0.09429 | 0.60244 | 0.01267 | Uiso | 1 | -0.572 |
| O42 | O | 0.31406 | 0.09363 | 0.67868 | 0.01267 | Uiso | 1 | -0.596 |
| O43 | O | 0.31124 | 0.26305 | 0.66932 | 0.01267 | Uiso | 1 | -0.579 |
| O44 | O | 0.38579 | 0.34007 | 0.5911  | 0.01267 | Uiso | 1 | -0.567 |
| O45 | O | 0.512   | 0.2983  | 0.44    | 0.01267 | Uiso | 1 | -0.204 |
| O46 | O | 0.99193 | 0.25392 | 0.0655  | 0.01267 | Uiso | 1 | -0.423 |
| O47 | O | 0.99047 | 0.32954 | 0.06718 | 0.01267 | Uiso | 1 | -0.355 |
| O48 | O | 0.9964  | 0.09001 | 0.22862 | 0.01267 | Uiso | 1 | -0.554 |
| O49 | O | 0.9994  | 0.09153 | 0.30294 | 0.01267 | Uiso | 1 | -0.592 |
| O50 | O | 0.025   | 0.2921  | 0.2278  | 0.01267 | Uiso | 1 | -0.199 |
| O51 | O | 0.02916 | 0.69288 | 0.23718 | 0.01267 | Uiso | 1 | -0.591 |
| O52 | O | 0.02782 | 0.61578 | 0.31478 | 0.01267 | Uiso | 1 | -0.590 |
| O53 | O | 0.03388 | 0.69537 | 0.06868 | 0.01267 | Uiso | 1 | -0.355 |
| O54 | O | 0.03793 | 0.62103 | 0.0657  | 0.01267 | Uiso | 1 | -0.440 |
| O55 | O | 0.0624  | 0.4936  | 0.241   | 0.01267 | Uiso | 1 | -0.183 |
| O56 | O | 0.00536 | 0.30327 | 0.60244 | 0.01267 | Uiso | 1 | -0.571 |
| O57 | O | 0.00726 | 0.22769 | 0.67868 | 0.01267 | Uiso | 1 | -0.592 |
| O58 | O | 0.01944 | 0.06763 | 0.66932 | 0.01267 | Uiso | 1 | -0.579 |
| O59 | O | 0.02311 | 0.06883 | 0.5911  | 0.01267 | Uiso | 1 | -0.567 |
| O60 | O | 0.048   | 0.2617  | 0.44    | 0.01267 | Uiso | 1 | -0.205 |
| O61 | O | 0.74608 | 0.05743 | 0.9345  | 0.01267 | Uiso | 1 | -0.462 |
| O62 | O | 0.67046 | 0.05765 | 0.93282 | 0.01267 | Uiso | 1 | -0.450 |
| O63 | O | 0.90999 | 0.22502 | 0.77138 | 0.01267 | Uiso | 1 | -0.549 |

|      |   |         |         |         |         |      |   |        |
|------|---|---------|---------|---------|---------|------|---|--------|
| O64  | O | 0.90847 | 0.30234 | 0.69706 | 0.01267 | Uiso | 1 | -0.593 |
| O65  | O | 0.7079  | 0.2528  | 0.7722  | 0.01267 | Uiso | 1 | -0.202 |
| O66  | O | 0.30712 | 0.26634 | 0.76282 | 0.01267 | Uiso | 1 | -0.572 |
| O67  | O | 0.38422 | 0.3426  | 0.68522 | 0.01267 | Uiso | 1 | -0.597 |
| O68  | O | 0.30463 | 0.10256 | 0.93132 | 0.01267 | Uiso | 1 | -0.409 |
| O69  | O | 0.37897 | 0.10363 | 0.9343  | 0.01267 | Uiso | 1 | -0.513 |
| O70  | O | 0.5064  | 0.3034  | 0.759   | 0.01267 | Uiso | 1 | -0.189 |
| O71  | O | 0.69673 | 0.6078  | 0.39756 | 0.01267 | Uiso | 1 | -0.573 |
| O72  | O | 0.77231 | 0.68594 | 0.32132 | 0.01267 | Uiso | 1 | -0.598 |
| O73  | O | 0.93237 | 0.68876 | 0.33068 | 0.01267 | Uiso | 1 | -0.581 |
| O74  | O | 0.93117 | 0.61421 | 0.4089  | 0.01267 | Uiso | 1 | -0.566 |
| O75  | O | 0.7383  | 0.488   | 0.56    | 0.01267 | Uiso | 1 | -0.208 |
| O76  | O | 0.31942 | 0.00807 | 0.9345  | 0.01267 | Uiso | 1 | -0.588 |
| O77  | O | 0.39672 | 0.00953 | 0.93282 | 0.01267 | Uiso | 1 | -0.642 |
| O78  | O | 0.31863 | 0.0036  | 0.77138 | 0.01267 | Uiso | 1 | -0.541 |
| O79  | O | 0.39447 | 0.0006  | 0.69706 | 0.01267 | Uiso | 1 | -0.589 |
| O80  | O | 0.5199  | 0.975   | 0.7722  | 0.01267 | Uiso | 1 | -0.193 |
| O81  | O | 0.93006 | 0.97084 | 0.76282 | 0.01267 | Uiso | 1 | -0.571 |
| O82  | O | 0.93056 | 0.97218 | 0.68522 | 0.01267 | Uiso | 1 | -0.592 |
| O83  | O | 0.76405 | 0.96612 | 0.93132 | 0.01267 | Uiso | 1 | -0.545 |
| O84  | O | 0.68673 | 0.96207 | 0.9343  | 0.01267 | Uiso | 1 | -0.535 |
| O85  | O | 0.7346  | 0.9376  | 0.759   | 0.01267 | Uiso | 1 | -0.182 |
| O86  | O | 0.90571 | 0.99464 | 0.39756 | 0.01267 | Uiso | 1 | -0.573 |
| O87  | O | 0.90637 | 0.99274 | 0.32132 | 0.01267 | Uiso | 1 | -0.596 |
| O88  | O | 0.73695 | 0.98056 | 0.33068 | 0.01267 | Uiso | 1 | -0.580 |
| O89  | O | 0.65993 | 0.97689 | 0.4089  | 0.01267 | Uiso | 1 | -0.567 |
| O90  | O | 0.7017  | 0.952   | 0.56    | 0.01267 | Uiso | 1 | -0.208 |
| O91  | O | 0.05743 | 0.31942 | 0.9345  | 0.01267 | Uiso | 1 | -0.334 |
| O92  | O | 0.05765 | 0.39672 | 0.93282 | 0.01267 | Uiso | 1 | -0.509 |
| O93  | O | 0.22502 | 0.31863 | 0.77138 | 0.01267 | Uiso | 1 | -0.555 |
| O94  | O | 0.30234 | 0.39447 | 0.69706 | 0.01267 | Uiso | 1 | -0.592 |
| O95  | O | 0.2528  | 0.5199  | 0.7722  | 0.01267 | Uiso | 1 | -0.203 |
| O96  | O | 0.26634 | 0.93006 | 0.76282 | 0.01267 | Uiso | 1 | -0.572 |
| O97  | O | 0.3426  | 0.93056 | 0.68522 | 0.01267 | Uiso | 1 | -0.597 |
| O98  | O | 0.10256 | 0.76405 | 0.93132 | 0.01267 | Uiso | 1 | -0.497 |
| O99  | O | 0.10363 | 0.68673 | 0.9343  | 0.01267 | Uiso | 1 | -0.385 |
| O100 | O | 0.3034  | 0.7346  | 0.759   | 0.01267 | Uiso | 1 | -0.187 |
| O101 | O | 0.6078  | 0.90571 | 0.39756 | 0.01267 | Uiso | 1 | -0.574 |
| O102 | O | 0.68594 | 0.90637 | 0.32132 | 0.01267 | Uiso | 1 | -0.597 |
| O103 | O | 0.68876 | 0.73695 | 0.33068 | 0.01267 | Uiso | 1 | -0.579 |
| O104 | O | 0.61421 | 0.65993 | 0.4089  | 0.01267 | Uiso | 1 | -0.566 |
| O105 | O | 0.488   | 0.7017  | 0.56    | 0.01267 | Uiso | 1 | -0.207 |
| O106 | O | 0.00807 | 0.74608 | 0.9345  | 0.01267 | Uiso | 1 | -0.425 |
| O107 | O | 0.00953 | 0.67046 | 0.93282 | 0.01267 | Uiso | 1 | -0.356 |
| O108 | O | 0.0036  | 0.90999 | 0.77138 | 0.01267 | Uiso | 1 | -0.554 |
| O109 | O | 0.0006  | 0.90847 | 0.69706 | 0.01267 | Uiso | 1 | -0.592 |
| O110 | O | 0.975   | 0.7079  | 0.7722  | 0.01267 | Uiso | 1 | -0.199 |
| O111 | O | 0.97084 | 0.30712 | 0.76282 | 0.01267 | Uiso | 1 | -0.591 |
| O112 | O | 0.97218 | 0.38422 | 0.68522 | 0.01267 | Uiso | 1 | -0.590 |
| O113 | O | 0.96612 | 0.30463 | 0.93132 | 0.01267 | Uiso | 1 | -0.355 |
| O114 | O | 0.96207 | 0.37897 | 0.9343  | 0.01267 | Uiso | 1 | -0.437 |
| O115 | O | 0.9376  | 0.5064  | 0.759   | 0.01267 | Uiso | 1 | -0.184 |

|      |   |         |         |         |         |      |   |        |
|------|---|---------|---------|---------|---------|------|---|--------|
| O116 | O | 0.99464 | 0.69673 | 0.39756 | 0.01267 | Uiso | 1 | -0.571 |
| O117 | O | 0.99274 | 0.77231 | 0.32132 | 0.01267 | Uiso | 1 | -0.593 |
| O118 | O | 0.98056 | 0.93237 | 0.33068 | 0.01267 | Uiso | 1 | -0.581 |
| O119 | O | 0.97689 | 0.93117 | 0.4089  | 0.01267 | Uiso | 1 | -0.567 |
| O120 | O | 0.952   | 0.7383  | 0.56    | 0.01267 | Uiso | 1 | -0.206 |

```

data_ADUWIH_clean
_audit_creation_date      2014-07-02
_audit_creation_method    'Materials Studio'
_symmetry_space_group_name_H-M  'P1'
_symmetry_Int_Tables_number  1
_symmetry_cell_setting    triclinic
loop_
_symmetry_equiv_pos_as_xyz
  x,y,z
_cell_length_a            22.0720
_cell_length_b            22.0720
_cell_length_c            22.0720
_cell_angle_alpha        90.0000
_cell_angle_beta         90.0000
_cell_angle_gamma        90.0000
loop_
_atom_site_label
_atom_site_type_symbol
_atom_site_fract_x
_atom_site_fract_y
_atom_site_fract_z
_atom_site_U_iso_or_equiv
_atom_site_adp_type
_atom_site_occupancy
_atom_site_charge
Zn1  Zn   0.59254   0.90746   0.59254   0.01267   Uiso  1   1.016
Zn2  Zn   0.90746   0.59254   0.59254   0.01267   Uiso  1   1.016
Zn3  Zn   0.90746   0.90746   0.90746   0.01267   Uiso  1   1.016
Zn4  Zn   0.59254   0.59254   0.90746   0.01267   Uiso  1   1.016
Zn5  Zn   0.40746   0.09254   0.40746   0.01267   Uiso  1   1.016
Zn6  Zn   0.09254   0.40746   0.40746   0.01267   Uiso  1   1.016
Zn7  Zn   0.09254   0.09254   0.09254   0.01267   Uiso  1   1.016
Zn8  Zn   0.40746   0.40746   0.09254   0.01267   Uiso  1   1.016
Zn9  Zn   0.5   0   0.5   0.01267   Uiso  1   1.080
Zn10 Zn   0   0.5   0.5   0.01267   Uiso  1   1.080
Zn11 Zn   0   0   0   0.01267   Uiso  1   1.080
Zn12 Zn   0.5   0.5   0   0.01267   Uiso  1   1.080
H1   H   0.5356 0.7475 0.5035 0.01267   Uiso  1   0.147
H2   H   0.4461 0.6938 0.3545 0.01267   Uiso  1   0.138
H3   H   0.4381 0.7939 0.3256 0.01267   Uiso  1   0.109
H4   H   0.481  0.8695 0.3815 0.01267   Uiso  1   0.126
H5   H   0.4298 0.6092 0.4201 0.01267   Uiso  1   0.104
H6   H   0.4899 0.5982 0.3828 0.01267   Uiso  1   0.101
H7   H   0.9644 0.7525 0.5035 0.01267   Uiso  1   0.147
H8   H   0.0539 0.8062 0.3545 0.01267   Uiso  1   0.138
H9   H   0.0619 0.7061 0.3256 0.01267   Uiso  1   0.109
H10  H   0.019  0.6305 0.3815 0.01267   Uiso  1   0.126
H11  H   0.0702 0.8908 0.4201 0.01267   Uiso  1   0.106
H12  H   0.0101 0.9018 0.3828 0.01267   Uiso  1   0.101
H13  H   0.9644 0.7475 0.9965 0.01267   Uiso  1   0.147
H14  H   0.0539 0.6938 0.1455 0.01267   Uiso  1   0.138

```

|     |   |        |        |        |         |      |   |       |
|-----|---|--------|--------|--------|---------|------|---|-------|
| H15 | H | 0.0619 | 0.7939 | 0.1744 | 0.01267 | Uiso | 1 | 0.109 |
| H16 | H | 0.019  | 0.8695 | 0.1185 | 0.01267 | Uiso | 1 | 0.126 |
| H17 | H | 0.0702 | 0.6092 | 0.0799 | 0.01267 | Uiso | 1 | 0.106 |
| H18 | H | 0.0101 | 0.5982 | 0.1172 | 0.01267 | Uiso | 1 | 0.101 |
| H19 | H | 0.5356 | 0.7525 | 0.9965 | 0.01267 | Uiso | 1 | 0.147 |
| H20 | H | 0.4461 | 0.8062 | 0.1455 | 0.01267 | Uiso | 1 | 0.138 |
| H21 | H | 0.4381 | 0.7061 | 0.1744 | 0.01267 | Uiso | 1 | 0.109 |
| H22 | H | 0.481  | 0.6305 | 0.1185 | 0.01267 | Uiso | 1 | 0.126 |
| H23 | H | 0.4298 | 0.8908 | 0.0799 | 0.01267 | Uiso | 1 | 0.104 |
| H24 | H | 0.4899 | 0.9018 | 0.1172 | 0.01267 | Uiso | 1 | 0.101 |
| H25 | H | 0.5035 | 0.5356 | 0.7475 | 0.01267 | Uiso | 1 | 0.147 |
| H26 | H | 0.3545 | 0.4461 | 0.6938 | 0.01267 | Uiso | 1 | 0.138 |
| H27 | H | 0.3256 | 0.4381 | 0.7939 | 0.01267 | Uiso | 1 | 0.109 |
| H28 | H | 0.3815 | 0.481  | 0.8695 | 0.01267 | Uiso | 1 | 0.126 |
| H29 | H | 0.4201 | 0.4298 | 0.6092 | 0.01267 | Uiso | 1 | 0.104 |
| H30 | H | 0.3828 | 0.4899 | 0.5982 | 0.01267 | Uiso | 1 | 0.101 |
| H31 | H | 0.5035 | 0.9644 | 0.7525 | 0.01267 | Uiso | 1 | 0.147 |
| H32 | H | 0.3545 | 0.0539 | 0.8062 | 0.01267 | Uiso | 1 | 0.138 |
| H33 | H | 0.3256 | 0.0619 | 0.7061 | 0.01267 | Uiso | 1 | 0.109 |
| H34 | H | 0.3815 | 0.019  | 0.6305 | 0.01267 | Uiso | 1 | 0.126 |
| H35 | H | 0.4201 | 0.0702 | 0.8908 | 0.01267 | Uiso | 1 | 0.106 |
| H36 | H | 0.3828 | 0.0101 | 0.9018 | 0.01267 | Uiso | 1 | 0.101 |
| H37 | H | 0.9965 | 0.9644 | 0.7475 | 0.01267 | Uiso | 1 | 0.147 |
| H38 | H | 0.1455 | 0.0539 | 0.6938 | 0.01267 | Uiso | 1 | 0.138 |
| H39 | H | 0.1744 | 0.0619 | 0.7939 | 0.01267 | Uiso | 1 | 0.109 |
| H40 | H | 0.1185 | 0.019  | 0.8695 | 0.01267 | Uiso | 1 | 0.126 |
| H41 | H | 0.0799 | 0.0702 | 0.6092 | 0.01267 | Uiso | 1 | 0.106 |
| H42 | H | 0.1172 | 0.0101 | 0.5982 | 0.01267 | Uiso | 1 | 0.101 |
| H43 | H | 0.9965 | 0.5356 | 0.7525 | 0.01267 | Uiso | 1 | 0.147 |
| H44 | H | 0.1455 | 0.4461 | 0.8062 | 0.01267 | Uiso | 1 | 0.138 |
| H45 | H | 0.1744 | 0.4381 | 0.7061 | 0.01267 | Uiso | 1 | 0.109 |
| H46 | H | 0.1185 | 0.481  | 0.6305 | 0.01267 | Uiso | 1 | 0.126 |
| H47 | H | 0.0799 | 0.4298 | 0.8908 | 0.01267 | Uiso | 1 | 0.104 |
| H48 | H | 0.1172 | 0.4899 | 0.9018 | 0.01267 | Uiso | 1 | 0.101 |
| H49 | H | 0.7475 | 0.5035 | 0.5356 | 0.01267 | Uiso | 1 | 0.147 |
| H50 | H | 0.6938 | 0.3545 | 0.4461 | 0.01267 | Uiso | 1 | 0.138 |
| H51 | H | 0.7939 | 0.3256 | 0.4381 | 0.01267 | Uiso | 1 | 0.109 |
| H52 | H | 0.8695 | 0.3815 | 0.481  | 0.01267 | Uiso | 1 | 0.126 |
| H53 | H | 0.6092 | 0.4201 | 0.4298 | 0.01267 | Uiso | 1 | 0.104 |
| H54 | H | 0.5982 | 0.3828 | 0.4899 | 0.01267 | Uiso | 1 | 0.101 |
| H55 | H | 0.7525 | 0.5035 | 0.9644 | 0.01267 | Uiso | 1 | 0.147 |
| H56 | H | 0.8062 | 0.3545 | 0.0539 | 0.01267 | Uiso | 1 | 0.138 |
| H57 | H | 0.7061 | 0.3256 | 0.0619 | 0.01267 | Uiso | 1 | 0.109 |
| H58 | H | 0.6305 | 0.3815 | 0.019  | 0.01267 | Uiso | 1 | 0.126 |
| H59 | H | 0.8908 | 0.4201 | 0.0702 | 0.01267 | Uiso | 1 | 0.106 |
| H60 | H | 0.9018 | 0.3828 | 0.0101 | 0.01267 | Uiso | 1 | 0.101 |
| H61 | H | 0.7475 | 0.9965 | 0.9644 | 0.01267 | Uiso | 1 | 0.147 |
| H62 | H | 0.6938 | 0.1455 | 0.0539 | 0.01267 | Uiso | 1 | 0.138 |
| H63 | H | 0.7939 | 0.1744 | 0.0619 | 0.01267 | Uiso | 1 | 0.109 |
| H64 | H | 0.8695 | 0.1185 | 0.019  | 0.01267 | Uiso | 1 | 0.126 |
| H65 | H | 0.6092 | 0.0799 | 0.0702 | 0.01267 | Uiso | 1 | 0.106 |
| H66 | H | 0.5982 | 0.1172 | 0.0101 | 0.01267 | Uiso | 1 | 0.101 |

|      |   |        |        |        |         |      |   |       |
|------|---|--------|--------|--------|---------|------|---|-------|
| H67  | H | 0.7525 | 0.9965 | 0.5356 | 0.01267 | Uiso | 1 | 0.147 |
| H68  | H | 0.8062 | 0.1455 | 0.4461 | 0.01267 | Uiso | 1 | 0.138 |
| H69  | H | 0.7061 | 0.1744 | 0.4381 | 0.01267 | Uiso | 1 | 0.109 |
| H70  | H | 0.6305 | 0.1185 | 0.481  | 0.01267 | Uiso | 1 | 0.126 |
| H71  | H | 0.8908 | 0.0799 | 0.4298 | 0.01267 | Uiso | 1 | 0.104 |
| H72  | H | 0.9018 | 0.1172 | 0.4899 | 0.01267 | Uiso | 1 | 0.101 |
| H73  | H | 0.4644 | 0.2525 | 0.4965 | 0.01267 | Uiso | 1 | 0.147 |
| H74  | H | 0.5539 | 0.3062 | 0.6455 | 0.01267 | Uiso | 1 | 0.138 |
| H75  | H | 0.5619 | 0.2061 | 0.6744 | 0.01267 | Uiso | 1 | 0.109 |
| H76  | H | 0.519  | 0.1305 | 0.6185 | 0.01267 | Uiso | 1 | 0.126 |
| H77  | H | 0.5702 | 0.3908 | 0.5799 | 0.01267 | Uiso | 1 | 0.105 |
| H78  | H | 0.5101 | 0.4018 | 0.6172 | 0.01267 | Uiso | 1 | 0.101 |
| H79  | H | 0.0356 | 0.2475 | 0.4965 | 0.01267 | Uiso | 1 | 0.147 |
| H80  | H | 0.9461 | 0.1938 | 0.6455 | 0.01267 | Uiso | 1 | 0.138 |
| H81  | H | 0.9381 | 0.2939 | 0.6744 | 0.01267 | Uiso | 1 | 0.109 |
| H82  | H | 0.981  | 0.3695 | 0.6185 | 0.01267 | Uiso | 1 | 0.126 |
| H83  | H | 0.9298 | 0.1092 | 0.5799 | 0.01267 | Uiso | 1 | 0.104 |
| H84  | H | 0.9899 | 0.0982 | 0.6172 | 0.01267 | Uiso | 1 | 0.101 |
| H85  | H | 0.0356 | 0.2525 | 0.0035 | 0.01267 | Uiso | 1 | 0.147 |
| H86  | H | 0.9461 | 0.3062 | 0.8545 | 0.01267 | Uiso | 1 | 0.138 |
| H87  | H | 0.9381 | 0.2061 | 0.8256 | 0.01267 | Uiso | 1 | 0.109 |
| H88  | H | 0.981  | 0.1305 | 0.8815 | 0.01267 | Uiso | 1 | 0.126 |
| H89  | H | 0.9298 | 0.3908 | 0.9201 | 0.01267 | Uiso | 1 | 0.104 |
| H90  | H | 0.9899 | 0.4018 | 0.8828 | 0.01267 | Uiso | 1 | 0.101 |
| H91  | H | 0.4644 | 0.2475 | 0.0035 | 0.01267 | Uiso | 1 | 0.147 |
| H92  | H | 0.5539 | 0.1938 | 0.8545 | 0.01267 | Uiso | 1 | 0.138 |
| H93  | H | 0.5619 | 0.2939 | 0.8256 | 0.01267 | Uiso | 1 | 0.109 |
| H94  | H | 0.519  | 0.3695 | 0.8815 | 0.01267 | Uiso | 1 | 0.126 |
| H95  | H | 0.5702 | 0.1092 | 0.9201 | 0.01267 | Uiso | 1 | 0.106 |
| H96  | H | 0.5101 | 0.0982 | 0.8828 | 0.01267 | Uiso | 1 | 0.100 |
| H97  | H | 0.4965 | 0.4644 | 0.2525 | 0.01267 | Uiso | 1 | 0.147 |
| H98  | H | 0.6455 | 0.5539 | 0.3062 | 0.01267 | Uiso | 1 | 0.138 |
| H99  | H | 0.6744 | 0.5619 | 0.2061 | 0.01267 | Uiso | 1 | 0.109 |
| H100 | H | 0.6185 | 0.519  | 0.1305 | 0.01267 | Uiso | 1 | 0.126 |
| H101 | H | 0.5799 | 0.5702 | 0.3908 | 0.01267 | Uiso | 1 | 0.105 |
| H102 | H | 0.6172 | 0.5101 | 0.4018 | 0.01267 | Uiso | 1 | 0.101 |
| H103 | H | 0.4965 | 0.0356 | 0.2475 | 0.01267 | Uiso | 1 | 0.147 |
| H104 | H | 0.6455 | 0.9461 | 0.1938 | 0.01267 | Uiso | 1 | 0.138 |
| H105 | H | 0.6744 | 0.9381 | 0.2939 | 0.01267 | Uiso | 1 | 0.109 |
| H106 | H | 0.6185 | 0.981  | 0.3695 | 0.01267 | Uiso | 1 | 0.126 |
| H107 | H | 0.5799 | 0.9298 | 0.1092 | 0.01267 | Uiso | 1 | 0.104 |
| H108 | H | 0.6172 | 0.9899 | 0.0982 | 0.01267 | Uiso | 1 | 0.101 |
| H109 | H | 0.0035 | 0.0356 | 0.2525 | 0.01267 | Uiso | 1 | 0.147 |
| H110 | H | 0.8545 | 0.9461 | 0.3062 | 0.01267 | Uiso | 1 | 0.138 |
| H111 | H | 0.8256 | 0.9381 | 0.2061 | 0.01267 | Uiso | 1 | 0.109 |
| H112 | H | 0.8815 | 0.981  | 0.1305 | 0.01267 | Uiso | 1 | 0.126 |
| H113 | H | 0.9201 | 0.9298 | 0.3908 | 0.01267 | Uiso | 1 | 0.104 |
| H114 | H | 0.8828 | 0.9899 | 0.4018 | 0.01267 | Uiso | 1 | 0.101 |
| H115 | H | 0.0035 | 0.4644 | 0.2475 | 0.01267 | Uiso | 1 | 0.147 |
| H116 | H | 0.8545 | 0.5539 | 0.1938 | 0.01267 | Uiso | 1 | 0.138 |
| H117 | H | 0.8256 | 0.5619 | 0.2939 | 0.01267 | Uiso | 1 | 0.109 |
| H118 | H | 0.8815 | 0.519  | 0.3695 | 0.01267 | Uiso | 1 | 0.126 |

|      |   |         |         |         |         |         |      |        |        |
|------|---|---------|---------|---------|---------|---------|------|--------|--------|
| H119 | H | 0.9201  | 0.5702  | 0.1092  | 0.01267 | Uiso    | 1    | 0.106  |        |
| H120 | H | 0.8828  | 0.5101  | 0.0982  | 0.01267 | Uiso    | 1    | 0.100  |        |
| H121 | H | 0.2525  | 0.4965  | 0.4644  | 0.01267 | Uiso    | 1    | 0.147  |        |
| H122 | H | 0.3062  | 0.6455  | 0.5539  | 0.01267 | Uiso    | 1    | 0.138  |        |
| H123 | H | 0.2061  | 0.6744  | 0.5619  | 0.01267 | Uiso    | 1    | 0.109  |        |
| H124 | H | 0.1305  | 0.6185  | 0.519   | 0.01267 | Uiso    | 1    | 0.126  |        |
| H125 | H | 0.3908  | 0.5799  | 0.5702  | 0.01267 | Uiso    | 1    | 0.105  |        |
| H126 | H | 0.4018  | 0.6172  | 0.5101  | 0.01267 | Uiso    | 1    | 0.101  |        |
| H127 | H | 0.2475  | 0.4965  | 0.0356  | 0.01267 | Uiso    | 1    | 0.147  |        |
| H128 | H | 0.1938  | 0.6455  | 0.9461  | 0.01267 | Uiso    | 1    | 0.138  |        |
| H129 | H | 0.2939  | 0.6744  | 0.9381  | 0.01267 | Uiso    | 1    | 0.109  |        |
| H130 | H | 0.3695  | 0.6185  | 0.981   | 0.01267 | Uiso    | 1    | 0.126  |        |
| H131 | H | 0.1092  | 0.5799  | 0.9298  | 0.01267 | Uiso    | 1    | 0.104  |        |
| H132 | H | 0.0982  | 0.6172  | 0.9899  | 0.01267 | Uiso    | 1    | 0.101  |        |
| H133 | H | 0.2525  | 0.0035  | 0.0356  | 0.01267 | Uiso    | 1    | 0.147  |        |
| H134 | H | 0.3062  | 0.8545  | 0.9461  | 0.01267 | Uiso    | 1    | 0.138  |        |
| H135 | H | 0.2061  | 0.8256  | 0.9381  | 0.01267 | Uiso    | 1    | 0.109  |        |
| H136 | H | 0.1305  | 0.8815  | 0.981   | 0.01267 | Uiso    | 1    | 0.126  |        |
| H137 | H | 0.3908  | 0.9201  | 0.9298  | 0.01267 | Uiso    | 1    | 0.104  |        |
| H138 | H | 0.4018  | 0.8828  | 0.9899  | 0.01267 | Uiso    | 1    | 0.101  |        |
| H139 | H | 0.2475  | 0.0035  | 0.4644  | 0.01267 | Uiso    | 1    | 0.147  |        |
| H140 | H | 0.1938  | 0.8545  | 0.5539  | 0.01267 | Uiso    | 1    | 0.138  |        |
| H141 | H | 0.2939  | 0.8256  | 0.5619  | 0.01267 | Uiso    | 1    | 0.109  |        |
| H142 | H | 0.3695  | 0.8815  | 0.519   | 0.01267 | Uiso    | 1    | 0.126  |        |
| H143 | H | 0.1092  | 0.9201  | 0.5702  | 0.01267 | Uiso    | 1    | 0.106  |        |
| H144 | H | 0.0982  | 0.8828  | 0.5101  | 0.01267 | Uiso    | 1    | 0.100  |        |
| C1   | C | 0.51173 |         | 0.81511 | 0.44898 | 0.01267 | Uiso | 1      | 0.001  |
| C2   | C | 0.51652 |         | 0.75665 | 0.46709 | 0.01267 | Uiso | 1      | -0.245 |
| C3   | C | 0.49283 |         | 0.70996 | 0.43111 | 0.01267 | Uiso | 1      | 0.260  |
| C4   | C | 0.463   | 0.7241  | 0.3783  | 0.01267 | Uiso    | 1    | -0.260 |        |
| C5   | C | 0.4586  | 0.7842  | 0.3612  | 0.01267 | Uiso    | 1    | -0.065 |        |
| C6   | C | 0.4832  | 0.82951 |         | 0.3947  | 0.01267 | Uiso | 1      | -0.140 |
| C7   | C | 0.53662 |         | 0.86454 | 0.48846 | 0.01267 | Uiso | 1      | 0.616  |
| C8   | C | 0.47326 |         | 0.60328 | 0.42321 | 0.01267 | Uiso | 1      | -0.066 |
| C9   | C | 0.48786 |         | 0.5492  | 0.46263 | 0.01267 | Uiso | 1      | 0.010  |
| C10  | C | 0.98827 |         | 0.68489 | 0.44898 | 0.01267 | Uiso | 1      | 0.001  |
| C11  | C | 0.98348 |         | 0.74335 | 0.46709 | 0.01267 | Uiso | 1      | -0.245 |
| C12  | C | 0.00717 |         | 0.79004 | 0.43111 | 0.01267 | Uiso | 1      | 0.260  |
| C13  | C | 0.037   | 0.7759  | 0.3783  | 0.01267 | Uiso    | 1    | -0.260 |        |
| C14  | C | 0.0414  | 0.7158  | 0.3612  | 0.01267 | Uiso    | 1    | -0.064 |        |
| C15  | C | 0.0168  | 0.67049 |         | 0.3947  | 0.01267 | Uiso | 1      | -0.139 |
| C16  | C | 0.96338 |         | 0.63546 | 0.48846 | 0.01267 | Uiso | 1      | 0.617  |
| C17  | C | 0.02674 |         | 0.89672 | 0.42321 | 0.01267 | Uiso | 1      | -0.068 |
| C18  | C | 0.01214 |         | 0.9508  | 0.46263 | 0.01267 | Uiso | 1      | 0.010  |
| C19  | C | 0.98827 |         | 0.81511 | 0.05102 | 0.01267 | Uiso | 1      | 0.001  |
| C20  | C | 0.98348 |         | 0.75665 | 0.03291 | 0.01267 | Uiso | 1      | -0.244 |
| C21  | C | 0.00717 |         | 0.70996 | 0.06889 | 0.01267 | Uiso | 1      | 0.260  |
| C22  | C | 0.037   | 0.7241  | 0.1217  | 0.01267 | Uiso    | 1    | -0.260 |        |
| C23  | C | 0.0414  | 0.7842  | 0.1388  | 0.01267 | Uiso    | 1    | -0.065 |        |
| C24  | C | 0.0168  | 0.82951 |         | 0.1053  | 0.01267 | Uiso | 1      | -0.139 |
| C25  | C | 0.96338 |         | 0.86454 | 0.01154 | 0.01267 | Uiso | 1      | 0.616  |
| C26  | C | 0.02674 |         | 0.60328 | 0.07679 | 0.01267 | Uiso | 1      | -0.069 |

|     |   |         |         |         |         |      |   |        |
|-----|---|---------|---------|---------|---------|------|---|--------|
| C27 | C | 0.01214 | 0.5492  | 0.03737 | 0.01267 | Uiso | 1 | 0.011  |
| C28 | C | 0.51173 | 0.68489 | 0.05102 | 0.01267 | Uiso | 1 | 0.001  |
| C29 | C | 0.51652 | 0.74335 | 0.03291 | 0.01267 | Uiso | 1 | -0.244 |
| C30 | C | 0.49283 | 0.79004 | 0.06889 | 0.01267 | Uiso | 1 | 0.260  |
| C31 | C | 0.463   | 0.7759  | 0.1217  | 0.01267 | Uiso | 1 | -0.260 |
| C32 | C | 0.4586  | 0.7158  | 0.1388  | 0.01267 | Uiso | 1 | -0.065 |
| C33 | C | 0.4832  | 0.67049 | 0.1053  | 0.01267 | Uiso | 1 | -0.140 |
| C34 | C | 0.53662 | 0.63546 | 0.01154 | 0.01267 | Uiso | 1 | 0.617  |
| C35 | C | 0.47326 | 0.89672 | 0.07679 | 0.01267 | Uiso | 1 | -0.066 |
| C36 | C | 0.48786 | 0.9508  | 0.03737 | 0.01267 | Uiso | 1 | 0.010  |
| C37 | C | 0.44898 | 0.51173 | 0.81511 | 0.01267 | Uiso | 1 | 0.001  |
| C38 | C | 0.46709 | 0.51652 | 0.75665 | 0.01267 | Uiso | 1 | -0.244 |
| C39 | C | 0.43111 | 0.49283 | 0.70996 | 0.01267 | Uiso | 1 | 0.260  |
| C40 | C | 0.3783  | 0.463   | 0.7241  | 0.01267 | Uiso | 1 | -0.260 |
| C41 | C | 0.3612  | 0.4586  | 0.7842  | 0.01267 | Uiso | 1 | -0.065 |
| C42 | C | 0.3947  | 0.4832  | 0.82951 | 0.01267 | Uiso | 1 | -0.140 |
| C43 | C | 0.48846 | 0.53662 | 0.86454 | 0.01267 | Uiso | 1 | 0.616  |
| C44 | C | 0.42321 | 0.47326 | 0.60328 | 0.01267 | Uiso | 1 | -0.066 |
| C45 | C | 0.46263 | 0.48786 | 0.5492  | 0.01267 | Uiso | 1 | 0.010  |
| C46 | C | 0.44898 | 0.98827 | 0.68489 | 0.01267 | Uiso | 1 | 0.001  |
| C47 | C | 0.46709 | 0.98348 | 0.74335 | 0.01267 | Uiso | 1 | -0.245 |
| C48 | C | 0.43111 | 0.00717 | 0.79004 | 0.01267 | Uiso | 1 | 0.260  |
| C49 | C | 0.3783  | 0.037   | 0.7759  | 0.01267 | Uiso | 1 | -0.260 |
| C50 | C | 0.3612  | 0.0414  | 0.7158  | 0.01267 | Uiso | 1 | -0.064 |
| C51 | C | 0.3947  | 0.0168  | 0.67049 | 0.01267 | Uiso | 1 | -0.139 |
| C52 | C | 0.48846 | 0.96338 | 0.63546 | 0.01267 | Uiso | 1 | 0.617  |
| C53 | C | 0.42321 | 0.02674 | 0.89672 | 0.01267 | Uiso | 1 | -0.068 |
| C54 | C | 0.46263 | 0.01214 | 0.9508  | 0.01267 | Uiso | 1 | 0.010  |
| C55 | C | 0.05102 | 0.98827 | 0.81511 | 0.01267 | Uiso | 1 | 0.001  |
| C56 | C | 0.03291 | 0.98348 | 0.75665 | 0.01267 | Uiso | 1 | -0.244 |
| C57 | C | 0.06889 | 0.00717 | 0.70996 | 0.01267 | Uiso | 1 | 0.260  |
| C58 | C | 0.1217  | 0.037   | 0.7241  | 0.01267 | Uiso | 1 | -0.260 |
| C59 | C | 0.1388  | 0.0414  | 0.7842  | 0.01267 | Uiso | 1 | -0.065 |
| C60 | C | 0.1053  | 0.0168  | 0.82951 | 0.01267 | Uiso | 1 | -0.139 |
| C61 | C | 0.01154 | 0.96338 | 0.86454 | 0.01267 | Uiso | 1 | 0.616  |
| C62 | C | 0.07679 | 0.02674 | 0.60328 | 0.01267 | Uiso | 1 | -0.069 |
| C63 | C | 0.03737 | 0.01214 | 0.5492  | 0.01267 | Uiso | 1 | 0.011  |
| C64 | C | 0.05102 | 0.51173 | 0.68489 | 0.01267 | Uiso | 1 | 0.001  |
| C65 | C | 0.03291 | 0.51652 | 0.74335 | 0.01267 | Uiso | 1 | -0.244 |
| C66 | C | 0.06889 | 0.49283 | 0.79004 | 0.01267 | Uiso | 1 | 0.260  |
| C67 | C | 0.1217  | 0.463   | 0.7759  | 0.01267 | Uiso | 1 | -0.260 |
| C68 | C | 0.1388  | 0.4586  | 0.7158  | 0.01267 | Uiso | 1 | -0.065 |
| C69 | C | 0.1053  | 0.4832  | 0.67049 | 0.01267 | Uiso | 1 | -0.140 |
| C70 | C | 0.01154 | 0.53662 | 0.63546 | 0.01267 | Uiso | 1 | 0.617  |
| C71 | C | 0.07679 | 0.47326 | 0.89672 | 0.01267 | Uiso | 1 | -0.066 |
| C72 | C | 0.03737 | 0.48786 | 0.9508  | 0.01267 | Uiso | 1 | 0.010  |
| C73 | C | 0.81511 | 0.44898 | 0.51173 | 0.01267 | Uiso | 1 | 0.001  |
| C74 | C | 0.75665 | 0.46709 | 0.51652 | 0.01267 | Uiso | 1 | -0.244 |
| C75 | C | 0.70996 | 0.43111 | 0.49283 | 0.01267 | Uiso | 1 | 0.260  |
| C76 | C | 0.7241  | 0.3783  | 0.463   | 0.01267 | Uiso | 1 | -0.260 |
| C77 | C | 0.7842  | 0.3612  | 0.4586  | 0.01267 | Uiso | 1 | -0.065 |
| C78 | C | 0.82951 | 0.3947  | 0.4832  | 0.01267 | Uiso | 1 | -0.140 |

|      |   |         |         |         |         |      |   |        |
|------|---|---------|---------|---------|---------|------|---|--------|
| C79  | C | 0.86454 | 0.48846 | 0.53662 | 0.01267 | Uiso | 1 | 0.616  |
| C80  | C | 0.60328 | 0.42321 | 0.47326 | 0.01267 | Uiso | 1 | -0.066 |
| C81  | C | 0.5492  | 0.46263 | 0.48786 | 0.01267 | Uiso | 1 | 0.010  |
| C82  | C | 0.68489 | 0.44898 | 0.98827 | 0.01267 | Uiso | 1 | 0.001  |
| C83  | C | 0.74335 | 0.46709 | 0.98348 | 0.01267 | Uiso | 1 | -0.245 |
| C84  | C | 0.79004 | 0.43111 | 0.00717 | 0.01267 | Uiso | 1 | 0.260  |
| C85  | C | 0.7759  | 0.3783  | 0.037   | 0.01267 | Uiso | 1 | -0.260 |
| C86  | C | 0.7158  | 0.3612  | 0.0414  | 0.01267 | Uiso | 1 | -0.065 |
| C87  | C | 0.67049 | 0.3947  | 0.0168  | 0.01267 | Uiso | 1 | -0.139 |
| C88  | C | 0.63546 | 0.48846 | 0.96338 | 0.01267 | Uiso | 1 | 0.617  |
| C89  | C | 0.89672 | 0.42321 | 0.02674 | 0.01267 | Uiso | 1 | -0.068 |
| C90  | C | 0.9508  | 0.46263 | 0.01214 | 0.01267 | Uiso | 1 | 0.010  |
| C91  | C | 0.81511 | 0.05102 | 0.98827 | 0.01267 | Uiso | 1 | 0.001  |
| C92  | C | 0.75665 | 0.03291 | 0.98348 | 0.01267 | Uiso | 1 | -0.244 |
| C93  | C | 0.70996 | 0.06889 | 0.00717 | 0.01267 | Uiso | 1 | 0.260  |
| C94  | C | 0.7241  | 0.1217  | 0.037   | 0.01267 | Uiso | 1 | -0.260 |
| C95  | C | 0.7842  | 0.1388  | 0.0414  | 0.01267 | Uiso | 1 | -0.065 |
| C96  | C | 0.82951 | 0.1053  | 0.0168  | 0.01267 | Uiso | 1 | -0.139 |
| C97  | C | 0.86454 | 0.01154 | 0.96338 | 0.01267 | Uiso | 1 | 0.616  |
| C98  | C | 0.60328 | 0.07679 | 0.02674 | 0.01267 | Uiso | 1 | -0.069 |
| C99  | C | 0.5492  | 0.03737 | 0.01214 | 0.01267 | Uiso | 1 | 0.011  |
| C100 | C | 0.68489 | 0.05102 | 0.51173 | 0.01267 | Uiso | 1 | 0.001  |
| C101 | C | 0.74335 | 0.03291 | 0.51652 | 0.01267 | Uiso | 1 | -0.244 |
| C102 | C | 0.79004 | 0.06889 | 0.49283 | 0.01267 | Uiso | 1 | 0.260  |
| C103 | C | 0.7759  | 0.1217  | 0.463   | 0.01267 | Uiso | 1 | -0.260 |
| C104 | C | 0.7158  | 0.1388  | 0.4586  | 0.01267 | Uiso | 1 | -0.065 |
| C105 | C | 0.67049 | 0.1053  | 0.4832  | 0.01267 | Uiso | 1 | -0.140 |
| C106 | C | 0.63546 | 0.01154 | 0.53662 | 0.01267 | Uiso | 1 | 0.617  |
| C107 | C | 0.89672 | 0.07679 | 0.47326 | 0.01267 | Uiso | 1 | -0.066 |
| C108 | C | 0.9508  | 0.03737 | 0.48786 | 0.01267 | Uiso | 1 | 0.010  |
| C109 | C | 0.48827 | 0.18489 | 0.55102 | 0.01267 | Uiso | 1 | 0.001  |
| C110 | C | 0.48348 | 0.24335 | 0.53291 | 0.01267 | Uiso | 1 | -0.245 |
| C111 | C | 0.50717 | 0.29004 | 0.56889 | 0.01267 | Uiso | 1 | 0.260  |
| C112 | C | 0.537   | 0.2759  | 0.6217  | 0.01267 | Uiso | 1 | -0.260 |
| C113 | C | 0.5414  | 0.2158  | 0.6388  | 0.01267 | Uiso | 1 | -0.064 |
| C114 | C | 0.5168  | 0.17049 | 0.6053  | 0.01267 | Uiso | 1 | -0.140 |
| C115 | C | 0.46338 | 0.13546 | 0.51154 | 0.01267 | Uiso | 1 | 0.616  |
| C116 | C | 0.52674 | 0.39672 | 0.57679 | 0.01267 | Uiso | 1 | -0.066 |
| C117 | C | 0.51214 | 0.4508  | 0.53737 | 0.01267 | Uiso | 1 | 0.010  |
| C118 | C | 0.01173 | 0.31511 | 0.55102 | 0.01267 | Uiso | 1 | 0.001  |
| C119 | C | 0.01652 | 0.25665 | 0.53291 | 0.01267 | Uiso | 1 | -0.245 |
| C120 | C | 0.99283 | 0.20996 | 0.56889 | 0.01267 | Uiso | 1 | 0.260  |
| C121 | C | 0.963   | 0.2241  | 0.6217  | 0.01267 | Uiso | 1 | -0.260 |
| C122 | C | 0.9586  | 0.2842  | 0.6388  | 0.01267 | Uiso | 1 | -0.065 |
| C123 | C | 0.9832  | 0.32951 | 0.6053  | 0.01267 | Uiso | 1 | -0.139 |
| C124 | C | 0.03662 | 0.36454 | 0.51154 | 0.01267 | Uiso | 1 | 0.616  |
| C125 | C | 0.97326 | 0.10328 | 0.57679 | 0.01267 | Uiso | 1 | -0.066 |
| C126 | C | 0.98786 | 0.0492  | 0.53737 | 0.01267 | Uiso | 1 | 0.011  |
| C127 | C | 0.01173 | 0.18489 | 0.94898 | 0.01267 | Uiso | 1 | 0.001  |
| C128 | C | 0.01652 | 0.24335 | 0.96709 | 0.01267 | Uiso | 1 | -0.244 |
| C129 | C | 0.99283 | 0.29004 | 0.93111 | 0.01267 | Uiso | 1 | 0.260  |
| C130 | C | 0.963   | 0.2759  | 0.8783  | 0.01267 | Uiso | 1 | -0.260 |

|      |   |         |         |         |         |      |   |        |  |
|------|---|---------|---------|---------|---------|------|---|--------|--|
| C131 | C | 0.9586  | 0.2158  | 0.8612  | 0.01267 | Uiso | 1 | -0.065 |  |
| C132 | C | 0.9832  | 0.17049 | 0.8947  | 0.01267 | Uiso | 1 | -0.140 |  |
| C133 | C | 0.03662 | 0.13546 | 0.98846 | 0.01267 | Uiso | 1 | 0.616  |  |
| C134 | C | 0.97326 | 0.39672 | 0.92321 | 0.01267 | Uiso | 1 | -0.066 |  |
| C135 | C | 0.98786 | 0.4508  | 0.96263 | 0.01267 | Uiso | 1 | 0.011  |  |
| C136 | C | 0.48827 | 0.31511 | 0.94898 | 0.01267 | Uiso | 1 | 0.001  |  |
| C137 | C | 0.48348 | 0.25665 | 0.96709 | 0.01267 | Uiso | 1 | -0.244 |  |
| C138 | C | 0.50717 | 0.20996 | 0.93111 | 0.01267 | Uiso | 1 | 0.260  |  |
| C139 | C | 0.537   | 0.2241  | 0.8783  | 0.01267 | Uiso | 1 | -0.260 |  |
| C140 | C | 0.5414  | 0.2842  | 0.8612  | 0.01267 | Uiso | 1 | -0.064 |  |
| C141 | C | 0.5168  | 0.32951 | 0.8947  | 0.01267 | Uiso | 1 | -0.139 |  |
| C142 | C | 0.46338 | 0.36454 | 0.98846 | 0.01267 | Uiso | 1 | 0.616  |  |
| C143 | C | 0.52674 | 0.10328 | 0.92321 | 0.01267 | Uiso | 1 | -0.068 |  |
| C144 | C | 0.51214 | 0.0492  | 0.96263 | 0.01267 | Uiso | 1 | 0.011  |  |
| C145 | C | 0.55102 | 0.48827 | 0.18489 | 0.01267 | Uiso | 1 | 0.001  |  |
| C146 | C | 0.53291 | 0.48348 | 0.24335 | 0.01267 | Uiso | 1 | -0.245 |  |
| C147 | C | 0.56889 | 0.50717 | 0.29004 | 0.01267 | Uiso | 1 | 0.260  |  |
| C148 | C | 0.6217  | 0.537   | 0.2759  | 0.01267 | Uiso | 1 | -0.260 |  |
| C149 | C | 0.6388  | 0.5414  | 0.2158  | 0.01267 | Uiso | 1 | -0.064 |  |
| C150 | C | 0.6053  | 0.5168  | 0.17049 | 0.01267 | Uiso | 1 | -0.140 |  |
| C151 | C | 0.51154 | 0.46338 | 0.13546 | 0.01267 | Uiso | 1 | 0.616  |  |
| C152 | C | 0.57679 | 0.52674 | 0.39672 | 0.01267 | Uiso | 1 | -0.066 |  |
| C153 | C | 0.53737 | 0.51214 | 0.4508  | 0.01267 | Uiso | 1 | 0.010  |  |
| C154 | C | 0.55102 | 0.01173 | 0.31511 | 0.01267 | Uiso | 1 | 0.001  |  |
| C155 | C | 0.53291 | 0.01652 | 0.25665 | 0.01267 | Uiso | 1 | -0.245 |  |
| C156 | C | 0.56889 | 0.99283 | 0.20996 | 0.01267 | Uiso | 1 | 0.260  |  |
| C157 | C | 0.6217  | 0.963   | 0.2241  | 0.01267 | Uiso | 1 | -0.260 |  |
| C158 | C | 0.6388  | 0.9586  | 0.2842  | 0.01267 | Uiso | 1 | -0.065 |  |
| C159 | C | 0.6053  | 0.9832  | 0.32951 | 0.01267 | Uiso | 1 | -0.139 |  |
| C160 | C | 0.51154 | 0.03662 | 0.36454 | 0.01267 | Uiso | 1 | 0.616  |  |
| C161 | C | 0.57679 | 0.97326 | 0.10328 | 0.01267 | Uiso | 1 | -0.066 |  |
| C162 | C | 0.53737 | 0.98786 | 0.0492  | 0.01267 | Uiso | 1 | 0.011  |  |
| C163 | C | 0.94898 | 0.01173 | 0.18489 | 0.01267 | Uiso | 1 | 0.001  |  |
| C164 | C | 0.96709 | 0.01652 | 0.24335 | 0.01267 | Uiso | 1 | -0.244 |  |
| C165 | C | 0.93111 | 0.99283 | 0.29004 | 0.01267 | Uiso | 1 | 0.260  |  |
| C166 | C | 0.8783  | 0.963   | 0.2759  | 0.01267 | Uiso | 1 | -0.260 |  |
| C167 | C | 0.8612  | 0.9586  | 0.2158  | 0.01267 | Uiso | 1 | -0.065 |  |
| C168 | C | 0.8947  | 0.9832  | 0.17049 | 0.01267 | Uiso | 1 | -0.140 |  |
| C169 | C | 0.98846 | 0.03662 | 0.13546 | 0.01267 | Uiso | 1 | 0.616  |  |
| C170 | C | 0.92321 | 0.97326 | 0.39672 | 0.01267 | Uiso | 1 | -0.066 |  |
| C171 | C | 0.96263 | 0.98786 | 0.4508  | 0.01267 | Uiso | 1 | 0.011  |  |
| C172 | C | 0.94898 | 0.48827 | 0.31511 | 0.01267 | Uiso | 1 | 0.001  |  |
| C173 | C | 0.96709 | 0.48348 | 0.25665 | 0.01267 | Uiso | 1 | -0.244 |  |
| C174 | C | 0.93111 | 0.50717 | 0.20996 | 0.01267 | Uiso | 1 | 0.260  |  |
| C175 | C | 0.8783  | 0.537   | 0.2241  | 0.01267 | Uiso | 1 | -0.260 |  |
| C176 | C | 0.8612  | 0.5414  | 0.2842  | 0.01267 | Uiso | 1 | -0.064 |  |
| C177 | C | 0.8947  | 0.5168  | 0.32951 | 0.01267 | Uiso | 1 | -0.139 |  |
| C178 | C | 0.98846 | 0.46338 | 0.36454 | 0.01267 | Uiso | 1 | 0.616  |  |
| C179 | C | 0.92321 | 0.52674 | 0.10328 | 0.01267 | Uiso | 1 | -0.068 |  |
| C180 | C | 0.96263 | 0.51214 | 0.0492  | 0.01267 | Uiso | 1 | 0.011  |  |
| C181 | C | 0.18489 | 0.55102 | 0.48827 | 0.01267 | Uiso | 1 | 0.001  |  |
| C182 | C | 0.24335 | 0.53291 | 0.48348 | 0.01267 | Uiso | 1 | -0.245 |  |

|      |   |         |         |         |         |      |   |        |
|------|---|---------|---------|---------|---------|------|---|--------|
| C183 | C | 0.29004 | 0.56889 | 0.50717 | 0.01267 | Uiso | 1 | 0.260  |
| C184 | C | 0.2759  | 0.6217  | 0.537   | 0.01267 | Uiso | 1 | -0.260 |
| C185 | C | 0.2158  | 0.6388  | 0.5414  | 0.01267 | Uiso | 1 | -0.064 |
| C186 | C | 0.17049 | 0.6053  | 0.5168  | 0.01267 | Uiso | 1 | -0.140 |
| C187 | C | 0.13546 | 0.51154 | 0.46338 | 0.01267 | Uiso | 1 | 0.616  |
| C188 | C | 0.39672 | 0.57679 | 0.52674 | 0.01267 | Uiso | 1 | -0.066 |
| C189 | C | 0.4508  | 0.53737 | 0.51214 | 0.01267 | Uiso | 1 | 0.010  |
| C190 | C | 0.31511 | 0.55102 | 0.01173 | 0.01267 | Uiso | 1 | 0.001  |
| C191 | C | 0.25665 | 0.53291 | 0.01652 | 0.01267 | Uiso | 1 | -0.245 |
| C192 | C | 0.20996 | 0.56889 | 0.99283 | 0.01267 | Uiso | 1 | 0.260  |
| C193 | C | 0.2241  | 0.6217  | 0.963   | 0.01267 | Uiso | 1 | -0.260 |
| C194 | C | 0.2842  | 0.6388  | 0.9586  | 0.01267 | Uiso | 1 | -0.065 |
| C195 | C | 0.32951 | 0.6053  | 0.9832  | 0.01267 | Uiso | 1 | -0.139 |
| C196 | C | 0.36454 | 0.51154 | 0.03662 | 0.01267 | Uiso | 1 | 0.616  |
| C197 | C | 0.10328 | 0.57679 | 0.97326 | 0.01267 | Uiso | 1 | -0.066 |
| C198 | C | 0.0492  | 0.53737 | 0.98786 | 0.01267 | Uiso | 1 | 0.011  |
| C199 | C | 0.18489 | 0.94898 | 0.01173 | 0.01267 | Uiso | 1 | 0.001  |
| C200 | C | 0.24335 | 0.96709 | 0.01652 | 0.01267 | Uiso | 1 | -0.244 |
| C201 | C | 0.29004 | 0.93111 | 0.99283 | 0.01267 | Uiso | 1 | 0.260  |
| C202 | C | 0.2759  | 0.8783  | 0.963   | 0.01267 | Uiso | 1 | -0.260 |
| C203 | C | 0.2158  | 0.8612  | 0.9586  | 0.01267 | Uiso | 1 | -0.065 |
| C204 | C | 0.17049 | 0.8947  | 0.9832  | 0.01267 | Uiso | 1 | -0.140 |
| C205 | C | 0.13546 | 0.98846 | 0.03662 | 0.01267 | Uiso | 1 | 0.616  |
| C206 | C | 0.39672 | 0.92321 | 0.97326 | 0.01267 | Uiso | 1 | -0.066 |
| C207 | C | 0.4508  | 0.96263 | 0.98786 | 0.01267 | Uiso | 1 | 0.011  |
| C208 | C | 0.31511 | 0.94898 | 0.48827 | 0.01267 | Uiso | 1 | 0.001  |
| C209 | C | 0.25665 | 0.96709 | 0.48348 | 0.01267 | Uiso | 1 | -0.244 |
| C210 | C | 0.20996 | 0.93111 | 0.50717 | 0.01267 | Uiso | 1 | 0.260  |
| C211 | C | 0.2241  | 0.8783  | 0.537   | 0.01267 | Uiso | 1 | -0.260 |
| C212 | C | 0.2842  | 0.8612  | 0.5414  | 0.01267 | Uiso | 1 | -0.065 |
| C213 | C | 0.32951 | 0.8947  | 0.5168  | 0.01267 | Uiso | 1 | -0.139 |
| C214 | C | 0.36454 | 0.98846 | 0.46338 | 0.01267 | Uiso | 1 | 0.616  |
| C215 | C | 0.10328 | 0.92321 | 0.52674 | 0.01267 | Uiso | 1 | -0.068 |
| C216 | C | 0.0492  | 0.96263 | 0.51214 | 0.01267 | Uiso | 1 | 0.011  |
| O1   | O | 0.53458 | 0.91755 | 0.47055 | 0.01267 | Uiso | 1 | -0.567 |
| O2   | O | 0.55924 | 0.8477  | 0.53876 | 0.01267 | Uiso | 1 | -0.582 |
| O3   | O | 0.5014  | 0.6534  | 0.45378 | 0.01267 | Uiso | 1 | -0.208 |
| O4   | O | 0.96542 | 0.58245 | 0.47055 | 0.01267 | Uiso | 1 | -0.567 |
| O5   | O | 0.94076 | 0.6523  | 0.53876 | 0.01267 | Uiso | 1 | -0.582 |
| O6   | O | 0.9986  | 0.8466  | 0.45378 | 0.01267 | Uiso | 1 | -0.208 |
| O7   | O | 0.96542 | 0.91755 | 0.02945 | 0.01267 | Uiso | 1 | -0.567 |
| O8   | O | 0.94076 | 0.8477  | 0.96124 | 0.01267 | Uiso | 1 | -0.583 |
| O9   | O | 0.9986  | 0.6534  | 0.04622 | 0.01267 | Uiso | 1 | -0.208 |
| O10  | O | 0.53458 | 0.58245 | 0.02945 | 0.01267 | Uiso | 1 | -0.567 |
| O11  | O | 0.55924 | 0.6523  | 0.96124 | 0.01267 | Uiso | 1 | -0.582 |
| O12  | O | 0.5014  | 0.8466  | 0.04622 | 0.01267 | Uiso | 1 | -0.208 |
| O13  | O | 0.47055 | 0.53458 | 0.91755 | 0.01267 | Uiso | 1 | -0.567 |
| O14  | O | 0.53876 | 0.55924 | 0.8477  | 0.01267 | Uiso | 1 | -0.582 |
| O15  | O | 0.45378 | 0.5014  | 0.6534  | 0.01267 | Uiso | 1 | -0.208 |
| O16  | O | 0.47055 | 0.96542 | 0.58245 | 0.01267 | Uiso | 1 | -0.567 |
| O17  | O | 0.53876 | 0.94076 | 0.6523  | 0.01267 | Uiso | 1 | -0.582 |
| O18  | O | 0.45378 | 0.9986  | 0.8466  | 0.01267 | Uiso | 1 | -0.208 |

|     |   |         |         |         |         |      |   |        |
|-----|---|---------|---------|---------|---------|------|---|--------|
| O19 | O | 0.02945 | 0.96542 | 0.91755 | 0.01267 | Uiso | 1 | -0.567 |
| O20 | O | 0.96124 | 0.94076 | 0.8477  | 0.01267 | Uiso | 1 | -0.583 |
| O21 | O | 0.04622 | 0.9986  | 0.6534  | 0.01267 | Uiso | 1 | -0.208 |
| O22 | O | 0.02945 | 0.53458 | 0.58245 | 0.01267 | Uiso | 1 | -0.567 |
| O23 | O | 0.96124 | 0.55924 | 0.6523  | 0.01267 | Uiso | 1 | -0.582 |
| O24 | O | 0.04622 | 0.5014  | 0.8466  | 0.01267 | Uiso | 1 | -0.208 |
| O25 | O | 0.91755 | 0.47055 | 0.53458 | 0.01267 | Uiso | 1 | -0.567 |
| O26 | O | 0.8477  | 0.53876 | 0.55924 | 0.01267 | Uiso | 1 | -0.582 |
| O27 | O | 0.6534  | 0.45378 | 0.5014  | 0.01267 | Uiso | 1 | -0.208 |
| O28 | O | 0.58245 | 0.47055 | 0.96542 | 0.01267 | Uiso | 1 | -0.567 |
| O29 | O | 0.6523  | 0.53876 | 0.94076 | 0.01267 | Uiso | 1 | -0.582 |
| O30 | O | 0.8466  | 0.45378 | 0.9986  | 0.01267 | Uiso | 1 | -0.208 |
| O31 | O | 0.91755 | 0.02945 | 0.96542 | 0.01267 | Uiso | 1 | -0.567 |
| O32 | O | 0.8477  | 0.96124 | 0.94076 | 0.01267 | Uiso | 1 | -0.583 |
| O33 | O | 0.6534  | 0.04622 | 0.9986  | 0.01267 | Uiso | 1 | -0.208 |
| O34 | O | 0.58245 | 0.02945 | 0.53458 | 0.01267 | Uiso | 1 | -0.567 |
| O35 | O | 0.6523  | 0.96124 | 0.55924 | 0.01267 | Uiso | 1 | -0.582 |
| O36 | O | 0.8466  | 0.04622 | 0.5014  | 0.01267 | Uiso | 1 | -0.208 |
| O37 | O | 0.46542 | 0.08245 | 0.52945 | 0.01267 | Uiso | 1 | -0.567 |
| O38 | O | 0.44076 | 0.1523  | 0.46124 | 0.01267 | Uiso | 1 | -0.583 |
| O39 | O | 0.4986  | 0.3466  | 0.54622 | 0.01267 | Uiso | 1 | -0.208 |
| O40 | O | 0.03458 | 0.41755 | 0.52945 | 0.01267 | Uiso | 1 | -0.567 |
| O41 | O | 0.05924 | 0.3477  | 0.46124 | 0.01267 | Uiso | 1 | -0.583 |
| O42 | O | 0.0014  | 0.1534  | 0.54622 | 0.01267 | Uiso | 1 | -0.208 |
| O43 | O | 0.03458 | 0.08245 | 0.97055 | 0.01267 | Uiso | 1 | -0.567 |
| O44 | O | 0.05924 | 0.1523  | 0.03876 | 0.01267 | Uiso | 1 | -0.582 |
| O45 | O | 0.0014  | 0.3466  | 0.95378 | 0.01267 | Uiso | 1 | -0.208 |
| O46 | O | 0.46542 | 0.41755 | 0.97055 | 0.01267 | Uiso | 1 | -0.567 |
| O47 | O | 0.44076 | 0.3477  | 0.03876 | 0.01267 | Uiso | 1 | -0.582 |
| O48 | O | 0.4986  | 0.1534  | 0.95378 | 0.01267 | Uiso | 1 | -0.208 |
| O49 | O | 0.52945 | 0.46542 | 0.08245 | 0.01267 | Uiso | 1 | -0.567 |
| O50 | O | 0.46124 | 0.44076 | 0.1523  | 0.01267 | Uiso | 1 | -0.583 |
| O51 | O | 0.54622 | 0.4986  | 0.3466  | 0.01267 | Uiso | 1 | -0.208 |
| O52 | O | 0.52945 | 0.03458 | 0.41755 | 0.01267 | Uiso | 1 | -0.567 |
| O53 | O | 0.46124 | 0.05924 | 0.3477  | 0.01267 | Uiso | 1 | -0.583 |
| O54 | O | 0.54622 | 0.0014  | 0.1534  | 0.01267 | Uiso | 1 | -0.208 |
| O55 | O | 0.97055 | 0.03458 | 0.08245 | 0.01267 | Uiso | 1 | -0.567 |
| O56 | O | 0.03876 | 0.05924 | 0.1523  | 0.01267 | Uiso | 1 | -0.582 |
| O57 | O | 0.95378 | 0.0014  | 0.3466  | 0.01267 | Uiso | 1 | -0.208 |
| O58 | O | 0.97055 | 0.46542 | 0.41755 | 0.01267 | Uiso | 1 | -0.567 |
| O59 | O | 0.03876 | 0.44076 | 0.3477  | 0.01267 | Uiso | 1 | -0.582 |
| O60 | O | 0.95378 | 0.4986  | 0.1534  | 0.01267 | Uiso | 1 | -0.208 |
| O61 | O | 0.08245 | 0.52945 | 0.46542 | 0.01267 | Uiso | 1 | -0.567 |
| O62 | O | 0.1523  | 0.46124 | 0.44076 | 0.01267 | Uiso | 1 | -0.583 |
| O63 | O | 0.3466  | 0.54622 | 0.4986  | 0.01267 | Uiso | 1 | -0.208 |
| O64 | O | 0.41755 | 0.52945 | 0.03458 | 0.01267 | Uiso | 1 | -0.567 |
| O65 | O | 0.3477  | 0.46124 | 0.05924 | 0.01267 | Uiso | 1 | -0.583 |
| O66 | O | 0.1534  | 0.54622 | 0.0014  | 0.01267 | Uiso | 1 | -0.208 |
| O67 | O | 0.08245 | 0.97055 | 0.03458 | 0.01267 | Uiso | 1 | -0.567 |
| O68 | O | 0.1523  | 0.03876 | 0.05924 | 0.01267 | Uiso | 1 | -0.582 |
| O69 | O | 0.3466  | 0.95378 | 0.0014  | 0.01267 | Uiso | 1 | -0.208 |
| O70 | O | 0.41755 | 0.97055 | 0.46542 | 0.01267 | Uiso | 1 | -0.567 |

|     |   |        |         |         |         |      |   |        |
|-----|---|--------|---------|---------|---------|------|---|--------|
| O71 | O | 0.3477 | 0.03876 | 0.44076 | 0.01267 | Uiso | 1 | -0.582 |
| O72 | O | 0.1534 | 0.95378 | 0.4986  | 0.01267 | Uiso | 1 | -0.208 |

data\_image0 ADUWON\_clean.cif

\_cell\_length\_a 30.014

\_cell\_length\_b 30.014

\_cell\_length\_c 30.014

\_cell\_angle\_alpha 90

\_cell\_angle\_beta 90

\_cell\_angle\_gamma 90

\_symmetry\_space\_group\_name\_H-M "P 1"

\_symmetry\_int\_tables\_number 1

loop\_

\_symmetry\_equiv\_pos\_as\_xyz

'x, y, z'

loop\_

\_atom\_site\_label

\_atom\_site\_occupancy

\_atom\_site\_fract\_x

\_atom\_site\_fract\_y

\_atom\_site\_fract\_z

\_atom\_site\_thermal\_displace\_type

\_atom\_site\_B\_iso\_or\_equiv

\_atom\_site\_type\_symbol

\_atom\_site\_charge

|     |   |        |        |        |      |   |   |       |
|-----|---|--------|--------|--------|------|---|---|-------|
| H1  | 1 | 0.2353 | 0.1982 | 0.3491 | Biso | 1 | H | 0.113 |
| H2  | 1 | 0.7353 | 0.6982 | 0.8491 | Biso | 1 | H | 0.112 |
| H3  | 1 | 0.7647 | 0.8018 | 0.3491 | Biso | 1 | H | 0.113 |
| H4  | 1 | 0.2647 | 0.3018 | 0.8491 | Biso | 1 | H | 0.112 |
| H5  | 1 | 0.7647 | 0.1982 | 0.6509 | Biso | 1 | H | 0.113 |
| H6  | 1 | 0.2647 | 0.6982 | 0.1509 | Biso | 1 | H | 0.111 |
| H7  | 1 | 0.2353 | 0.8018 | 0.6509 | Biso | 1 | H | 0.113 |
| H8  | 1 | 0.7353 | 0.3018 | 0.1509 | Biso | 1 | H | 0.113 |
| H9  | 1 | 0.3491 | 0.2353 | 0.1982 | Biso | 1 | H | 0.113 |
| H10 | 1 | 0.8491 | 0.7353 | 0.6982 | Biso | 1 | H | 0.112 |
| H11 | 1 | 0.3491 | 0.7647 | 0.8018 | Biso | 1 | H | 0.113 |
| H12 | 1 | 0.8491 | 0.2647 | 0.3018 | Biso | 1 | H | 0.112 |
| H13 | 1 | 0.6509 | 0.7647 | 0.1982 | Biso | 1 | H | 0.113 |
| H14 | 1 | 0.1509 | 0.2647 | 0.6982 | Biso | 1 | H | 0.111 |
| H15 | 1 | 0.6509 | 0.2353 | 0.8018 | Biso | 1 | H | 0.112 |
| H16 | 1 | 0.1509 | 0.7353 | 0.3018 | Biso | 1 | H | 0.112 |
| H17 | 1 | 0.1982 | 0.3491 | 0.2353 | Biso | 1 | H | 0.113 |
| H18 | 1 | 0.6982 | 0.8491 | 0.7353 | Biso | 1 | H | 0.112 |
| H19 | 1 | 0.8018 | 0.3491 | 0.7647 | Biso | 1 | H | 0.113 |
| H20 | 1 | 0.3018 | 0.8491 | 0.2647 | Biso | 1 | H | 0.113 |
| H21 | 1 | 0.1982 | 0.6509 | 0.7647 | Biso | 1 | H | 0.113 |
| H22 | 1 | 0.6982 | 0.1509 | 0.2647 | Biso | 1 | H | 0.111 |
| H23 | 1 | 0.8018 | 0.6509 | 0.2353 | Biso | 1 | H | 0.112 |
| H24 | 1 | 0.3018 | 0.1509 | 0.7353 | Biso | 1 | H | 0.113 |
| H25 | 1 | 0.1982 | 0.2353 | 0.6509 | Biso | 1 | H | 0.113 |
| H26 | 1 | 0.6982 | 0.7353 | 0.1509 | Biso | 1 | H | 0.113 |

|     |   |        |        |        |      |   |   |       |
|-----|---|--------|--------|--------|------|---|---|-------|
| H27 | 1 | 0.8018 | 0.7647 | 0.6509 | Biso | 1 | H | 0.113 |
| H28 | 1 | 0.3018 | 0.2647 | 0.1509 | Biso | 1 | H | 0.113 |
| H29 | 1 | 0.1982 | 0.7647 | 0.3491 | Biso | 1 | H | 0.113 |
| H30 | 1 | 0.6982 | 0.2647 | 0.8491 | Biso | 1 | H | 0.111 |
| H31 | 1 | 0.8018 | 0.2353 | 0.3491 | Biso | 1 | H | 0.112 |
| H32 | 1 | 0.3018 | 0.7353 | 0.8491 | Biso | 1 | H | 0.112 |
| H33 | 1 | 0.2353 | 0.3491 | 0.8018 | Biso | 1 | H | 0.112 |
| H34 | 1 | 0.7353 | 0.8491 | 0.3018 | Biso | 1 | H | 0.112 |
| H35 | 1 | 0.7647 | 0.3491 | 0.1982 | Biso | 1 | H | 0.113 |
| H36 | 1 | 0.2647 | 0.8491 | 0.6982 | Biso | 1 | H | 0.111 |
| H37 | 1 | 0.7647 | 0.6509 | 0.8018 | Biso | 1 | H | 0.113 |
| H38 | 1 | 0.2647 | 0.1509 | 0.3018 | Biso | 1 | H | 0.113 |
| H39 | 1 | 0.2353 | 0.6509 | 0.1982 | Biso | 1 | H | 0.113 |
| H40 | 1 | 0.7353 | 0.1509 | 0.6982 | Biso | 1 | H | 0.113 |
| H41 | 1 | 0.3491 | 0.1982 | 0.7647 | Biso | 1 | H | 0.113 |
| H42 | 1 | 0.8491 | 0.6982 | 0.2647 | Biso | 1 | H | 0.111 |
| H43 | 1 | 0.3491 | 0.8018 | 0.2353 | Biso | 1 | H | 0.112 |
| H44 | 1 | 0.8491 | 0.3018 | 0.7353 | Biso | 1 | H | 0.112 |
| H45 | 1 | 0.6509 | 0.1982 | 0.2353 | Biso | 1 | H | 0.113 |
| H46 | 1 | 0.1509 | 0.6982 | 0.7353 | Biso | 1 | H | 0.113 |
| H47 | 1 | 0.6509 | 0.8018 | 0.7647 | Biso | 1 | H | 0.113 |
| H48 | 1 | 0.1509 | 0.3018 | 0.2647 | Biso | 1 | H | 0.113 |
| H49 | 1 | 0.7647 | 0.8018 | 0.6509 | Biso | 1 | H | 0.113 |
| H50 | 1 | 0.2647 | 0.3018 | 0.1509 | Biso | 1 | H | 0.113 |
| H51 | 1 | 0.2353 | 0.1982 | 0.6509 | Biso | 1 | H | 0.113 |
| H52 | 1 | 0.7353 | 0.6982 | 0.1509 | Biso | 1 | H | 0.113 |
| H53 | 1 | 0.2353 | 0.8018 | 0.3491 | Biso | 1 | H | 0.112 |
| H54 | 1 | 0.7353 | 0.3018 | 0.8491 | Biso | 1 | H | 0.112 |
| H55 | 1 | 0.7647 | 0.1982 | 0.3491 | Biso | 1 | H | 0.113 |
| H56 | 1 | 0.2647 | 0.6982 | 0.8491 | Biso | 1 | H | 0.111 |
| H57 | 1 | 0.6509 | 0.7647 | 0.8018 | Biso | 1 | H | 0.113 |
| H58 | 1 | 0.1509 | 0.2647 | 0.3018 | Biso | 1 | H | 0.113 |
| H59 | 1 | 0.6509 | 0.2353 | 0.1982 | Biso | 1 | H | 0.113 |
| H60 | 1 | 0.1509 | 0.7353 | 0.6982 | Biso | 1 | H | 0.113 |
| H61 | 1 | 0.3491 | 0.2353 | 0.8018 | Biso | 1 | H | 0.112 |
| H62 | 1 | 0.8491 | 0.7353 | 0.3018 | Biso | 1 | H | 0.112 |
| H63 | 1 | 0.3491 | 0.7647 | 0.1982 | Biso | 1 | H | 0.113 |
| H64 | 1 | 0.8491 | 0.2647 | 0.6982 | Biso | 1 | H | 0.111 |
| H65 | 1 | 0.8018 | 0.6509 | 0.7647 | Biso | 1 | H | 0.113 |
| H66 | 1 | 0.3018 | 0.1509 | 0.2647 | Biso | 1 | H | 0.113 |
| H67 | 1 | 0.1982 | 0.6509 | 0.2353 | Biso | 1 | H | 0.113 |
| H68 | 1 | 0.6982 | 0.1509 | 0.7353 | Biso | 1 | H | 0.113 |
| H69 | 1 | 0.8018 | 0.3491 | 0.2353 | Biso | 1 | H | 0.112 |
| H70 | 1 | 0.3018 | 0.8491 | 0.7353 | Biso | 1 | H | 0.112 |
| H71 | 1 | 0.1982 | 0.3491 | 0.7647 | Biso | 1 | H | 0.113 |
| H72 | 1 | 0.6982 | 0.8491 | 0.2647 | Biso | 1 | H | 0.111 |
| H73 | 1 | 0.8018 | 0.7647 | 0.3491 | Biso | 1 | H | 0.113 |
| H74 | 1 | 0.3018 | 0.2647 | 0.8491 | Biso | 1 | H | 0.112 |
| H75 | 1 | 0.1982 | 0.2353 | 0.3491 | Biso | 1 | H | 0.113 |
| H76 | 1 | 0.6982 | 0.7353 | 0.8491 | Biso | 1 | H | 0.112 |
| H77 | 1 | 0.8018 | 0.2353 | 0.6509 | Biso | 1 | H | 0.112 |
| H78 | 1 | 0.3018 | 0.7353 | 0.1509 | Biso | 1 | H | 0.112 |

|      |   |         |         |         |             |      |    |        |        |
|------|---|---------|---------|---------|-------------|------|----|--------|--------|
| H79  | 1 | 0.1982  | 0.7647  | 0.6509  | Biso        | 1    | H  | 0.113  |        |
| H80  | 1 | 0.6982  | 0.2647  | 0.1509  | Biso        | 1    | H  | 0.111  |        |
| H81  | 1 | 0.7647  | 0.6509  | 0.1982  | Biso        | 1    | H  | 0.113  |        |
| H82  | 1 | 0.2647  | 0.1509  | 0.6982  | Biso        | 1    | H  | 0.111  |        |
| H83  | 1 | 0.2353  | 0.6509  | 0.8018  | Biso        | 1    | H  | 0.112  |        |
| H84  | 1 | 0.7353  | 0.1509  | 0.3018  | Biso        | 1    | H  | 0.113  |        |
| H85  | 1 | 0.2353  | 0.3491  | 0.1982  | Biso        | 1    | H  | 0.113  |        |
| H86  | 1 | 0.7353  | 0.8491  | 0.6982  | Biso        | 1    | H  | 0.112  |        |
| H87  | 1 | 0.7647  | 0.3491  | 0.8018  | Biso        | 1    | H  | 0.113  |        |
| H88  | 1 | 0.2647  | 0.8491  | 0.3018  | Biso        | 1    | H  | 0.113  |        |
| H89  | 1 | 0.6509  | 0.8018  | 0.2353  | Biso        | 1    | H  | 0.113  |        |
| H90  | 1 | 0.1509  | 0.3018  | 0.7353  | Biso        | 1    | H  | 0.113  |        |
| H91  | 1 | 0.6509  | 0.1982  | 0.7647  | Biso        | 1    | H  | 0.113  |        |
| H92  | 1 | 0.1509  | 0.6982  | 0.2647  | Biso        | 1    | H  | 0.111  |        |
| H93  | 1 | 0.3491  | 0.8018  | 0.7647  | Biso        | 1    | H  | 0.113  |        |
| H94  | 1 | 0.8491  | 0.3018  | 0.2647  | Biso        | 1    | H  | 0.112  |        |
| H95  | 1 | 0.3491  | 0.1982  | 0.2353  | Biso        | 1    | H  | 0.112  |        |
| H96  | 1 | 0.8491  | 0.6982  | 0.7353  | Biso        | 1    | H  | 0.112  |        |
| Ni1  | 1 | 0       | 0       | 0.37657 | Biso        | 1    | Ni | 0.895  |        |
| Ni2  | 1 | 0.5     | 0.5     | 0.87657 | Biso        | 1    | Ni | 0.895  |        |
| Ni3  | 1 | 0       | 0       | 0.62343 | Biso        | 1    | Ni | 0.895  |        |
| Ni4  | 1 | 0.5     | 0.5     | 0.12343 | Biso        | 1    | Ni | 0.894  |        |
| Ni5  | 1 | 0.37657 | 0       | 0       | Biso        | 1    | Ni | 0.895  |        |
| Ni6  | 1 | 0.87657 | 0.5     | 0.5     | Biso        | 1    | Ni | 0.895  |        |
| Ni7  | 1 | 0.62343 | 0       | 0       | Biso        | 1    | Ni | 0.894  |        |
| Ni8  | 1 | 0.12343 | 0.5     | 0.5     | Biso        | 1    | Ni | 0.896  |        |
| Ni9  | 1 | 0       | 0.37657 | 0       | Biso        | 1    | Ni | 0.894  |        |
| Ni10 | 1 | 0.5     | 0.87657 | 0.5     | Biso        | 1    | Ni | 0.895  |        |
| Ni11 | 1 | 0       | 0.62343 | 0       | Biso        | 1    | Ni | 0.894  |        |
| Ni12 | 1 | 0.5     | 0.12343 | 0.5     | Biso        | 1    | Ni | 0.894  |        |
| C1   | 1 | 0.06793 |         | 0.06793 | 0.3518 Biso | 1    | C  | 0.569  |        |
| C2   | 1 | 0.10191 |         | 0.10191 | 0.3686 Biso | 1    | C  | 0.019  |        |
| C3   | 1 | 0.1099  | 0.1099  | 0.4108  | Biso        | 1    | C  | -0.136 |        |
| H97  | 1 | 0.0938  | 0.0938  | 0.4319  | Biso        | 1    | H  | 0.123  |        |
| C4   | 1 | 0.1374  | 0.1374  | 0.4242  | Biso        | 1    | C  | -0.045 |        |
| H98  | 1 | 0.141   | 0.141   | 0.4548  | Biso        | 1    | H  | 0.101  |        |
| C5   | 1 | 0.1641  | 0.1641  | 0.395   | Biso        | 1    | C  | -0.265 |        |
| H99  | 1 | 0.1847  | 0.1847  | 0.4055  | Biso        | 1    | H  | 0.138  |        |
| C6   | 1 | 0.15711 |         | 0.15711 | 0.3501 Biso | 1    | C  | 0.266  |        |
| C7   | 1 | 0.12524 |         | 0.12524 | 0.3352 Biso | 1    | C  | -0.235 |        |
| H100 | 1 | 0.1201  | 0.1201  | 0.3051  | Biso        | 1    | H  | 0.162  |        |
| C8   | 1 | 0.21207 |         | 0.21207 | 0.3314 Biso | 1    | C  | -0.074 |        |
| C9   | 1 | 0.23111 |         | 0.23111 | 0.28973     | Biso | 1  | C      | 0.011  |
| O1   | 1 | 0.0639  | 0.0639  | 0.31089 | Biso        | 1    | O  | -0.413 |        |
| O2   | 1 | 0.04748 |         | 0.04748 | 0.38002     | Biso | 1  | O      | -0.481 |
| O3   | 1 | 0.17918 |         | 0.17918 | 0.31775     | Biso | 1  | O      | -0.189 |
| C10  | 1 | 0.56793 |         | 0.56793 | 0.8518 Biso | 1    | C  | 0.568  |        |
| C11  | 1 | 0.60191 |         | 0.60191 | 0.8686 Biso | 1    | C  | 0.019  |        |
| C12  | 1 | 0.6099  | 0.6099  | 0.9108  | Biso        | 1    | C  | -0.138 |        |
| H101 | 1 | 0.5938  | 0.5938  | 0.9319  | Biso        | 1    | H  | 0.125  |        |
| C13  | 1 | 0.6374  | 0.6374  | 0.9242  | Biso        | 1    | C  | -0.045 |        |
| H102 | 1 | 0.641   | 0.641   | 0.9548  | Biso        | 1    | H  | 0.101  |        |

|      |   |         |        |         |      |         |      |        |        |        |        |
|------|---|---------|--------|---------|------|---------|------|--------|--------|--------|--------|
| C14  | 1 | 0.6641  | 0.6641 | 0.895   | Biso | 1       | C    | -0.265 |        |        |        |
| H103 | 1 | 0.6847  | 0.6847 | 0.9055  | Biso | 1       | H    | 0.137  |        |        |        |
| C15  | 1 | 0.65711 |        | 0.65711 |      | 0.8501  | Biso | 1      | C      | 0.266  |        |
| C16  | 1 | 0.62524 |        | 0.62524 |      | 0.8352  | Biso | 1      | C      | -0.235 |        |
| H104 | 1 | 0.6201  | 0.6201 | 0.8051  | Biso | 1       | H    | 0.162  |        |        |        |
| C17  | 1 | 0.71207 |        | 0.71207 |      | 0.8314  | Biso | 1      | C      | -0.074 |        |
| C18  | 1 | 0.73111 |        | 0.73111 |      | 0.78973 |      | Biso   | 1      | C      | 0.011  |
| O4   | 1 | 0.5639  | 0.5639 | 0.81089 |      | Biso    | 1    | O      | -0.412 |        |        |
| O5   | 1 | 0.54748 |        | 0.54748 |      | 0.88002 |      | Biso   | 1      | O      | -0.481 |
| O6   | 1 | 0.67918 |        | 0.67918 |      | 0.81775 |      | Biso   | 1      | O      | -0.189 |
| C19  | 1 | 0.93207 |        | 0.93207 |      | 0.3518  | Biso | 1      | C      | 0.569  |        |
| C20  | 1 | 0.89809 |        | 0.89809 |      | 0.3686  | Biso | 1      | C      | 0.019  |        |
| C21  | 1 | 0.8901  | 0.8901 | 0.4108  | Biso | 1       | C    | -0.136 |        |        |        |
| H105 | 1 | 0.9062  | 0.9062 | 0.4319  | Biso | 1       | H    | 0.123  |        |        |        |
| C22  | 1 | 0.8626  | 0.8626 | 0.4242  | Biso | 1       | C    | -0.045 |        |        |        |
| H106 | 1 | 0.859   | 0.859  | 0.4548  | Biso | 1       | H    | 0.101  |        |        |        |
| C23  | 1 | 0.8359  | 0.8359 | 0.395   | Biso | 1       | C    | -0.265 |        |        |        |
| H107 | 1 | 0.8153  | 0.8153 | 0.4055  | Biso | 1       | H    | 0.138  |        |        |        |
| C24  | 1 | 0.84289 |        | 0.84289 |      | 0.3501  | Biso | 1      | C      | 0.266  |        |
| C25  | 1 | 0.87476 |        | 0.87476 |      | 0.3352  | Biso | 1      | C      | -0.235 |        |
| H108 | 1 | 0.8799  | 0.8799 | 0.3051  | Biso | 1       | H    | 0.162  |        |        |        |
| C26  | 1 | 0.78793 |        | 0.78793 |      | 0.3314  | Biso | 1      | C      | -0.074 |        |
| C27  | 1 | 0.76889 |        | 0.76889 |      | 0.28973 |      | Biso   | 1      | C      | 0.011  |
| O7   | 1 | 0.9361  | 0.9361 | 0.31089 |      | Biso    | 1    | O      | -0.413 |        |        |
| O8   | 1 | 0.95252 |        | 0.95252 |      | 0.38002 |      | Biso   | 1      | O      | -0.481 |
| O9   | 1 | 0.82082 |        | 0.82082 |      | 0.31775 |      | Biso   | 1      | O      | -0.189 |
| C28  | 1 | 0.43207 |        | 0.43207 |      | 0.8518  | Biso | 1      | C      | 0.568  |        |
| C29  | 1 | 0.39809 |        | 0.39809 |      | 0.8686  | Biso | 1      | C      | 0.020  |        |
| C30  | 1 | 0.3901  | 0.3901 | 0.9108  | Biso | 1       | C    | -0.136 |        |        |        |
| H109 | 1 | 0.4062  | 0.4062 | 0.9319  | Biso | 1       | H    | 0.123  |        |        |        |
| C31  | 1 | 0.3626  | 0.3626 | 0.9242  | Biso | 1       | C    | -0.044 |        |        |        |
| H110 | 1 | 0.359   | 0.359  | 0.9548  | Biso | 1       | H    | 0.101  |        |        |        |
| C32  | 1 | 0.3359  | 0.3359 | 0.895   | Biso | 1       | C    | -0.265 |        |        |        |
| H111 | 1 | 0.3153  | 0.3153 | 0.9055  | Biso | 1       | H    | 0.138  |        |        |        |
| C33  | 1 | 0.34289 |        | 0.34289 |      | 0.8501  | Biso | 1      | C      | 0.266  |        |
| C34  | 1 | 0.37476 |        | 0.37476 |      | 0.8352  | Biso | 1      | C      | -0.235 |        |
| H112 | 1 | 0.3799  | 0.3799 | 0.8051  | Biso | 1       | H    | 0.162  |        |        |        |
| C35  | 1 | 0.28793 |        | 0.28793 |      | 0.8314  | Biso | 1      | C      | -0.074 |        |
| C36  | 1 | 0.26889 |        | 0.26889 |      | 0.78973 |      | Biso   | 1      | C      | 0.011  |
| O10  | 1 | 0.4361  | 0.4361 | 0.81089 |      | Biso    | 1    | O      | -0.413 |        |        |
| O11  | 1 | 0.45252 |        | 0.45252 |      | 0.88002 |      | Biso   | 1      | O      | -0.481 |
| O12  | 1 | 0.32082 |        | 0.32082 |      | 0.81775 |      | Biso   | 1      | O      | -0.189 |
| C37  | 1 | 0.93207 |        | 0.06793 |      | 0.6482  | Biso | 1      | C      | 0.569  |        |
| C38  | 1 | 0.89809 |        | 0.10191 |      | 0.6314  | Biso | 1      | C      | 0.019  |        |
| C39  | 1 | 0.8901  | 0.1099 | 0.5892  | Biso | 1       | C    | -0.139 |        |        |        |
| H113 | 1 | 0.9062  | 0.0938 | 0.5681  | Biso | 1       | H    | 0.125  |        |        |        |
| C40  | 1 | 0.8626  | 0.1374 | 0.5758  | Biso | 1       | C    | -0.044 |        |        |        |
| H114 | 1 | 0.859   | 0.141  | 0.5452  | Biso | 1       | H    | 0.101  |        |        |        |
| C41  | 1 | 0.8359  | 0.1641 | 0.605   | Biso | 1       | C    | -0.266 |        |        |        |
| H115 | 1 | 0.8153  | 0.1847 | 0.5945  | Biso | 1       | H    | 0.138  |        |        |        |
| C42  | 1 | 0.84289 |        | 0.15711 |      | 0.6499  | Biso | 1      | C      | 0.266  |        |
| C43  | 1 | 0.87476 |        | 0.12524 |      | 0.6648  | Biso | 1      | C      | -0.234 |        |

|      |   |         |        |         |      |         |      |        |        |        |
|------|---|---------|--------|---------|------|---------|------|--------|--------|--------|
| H116 | 1 | 0.8799  | 0.1201 | 0.6949  | Biso | 1       | H    | 0.162  |        |        |
| C44  | 1 | 0.78793 |        | 0.21207 |      | 0.6686  | Biso | 1      | C      | -0.074 |
| C45  | 1 | 0.76889 |        | 0.23111 |      | 0.71027 | Biso | 1      | C      | 0.011  |
| O13  | 1 | 0.9361  | 0.0639 | 0.68911 |      | Biso    | 1    | O      | -0.413 |        |
| O14  | 1 | 0.95252 |        | 0.04748 |      | 0.61998 | Biso | 1      | O      | -0.480 |
| O15  | 1 | 0.82082 |        | 0.17918 |      | 0.68225 | Biso | 1      | O      | -0.190 |
| C46  | 1 | 0.43207 |        | 0.56793 |      | 0.1482  | Biso | 1      | C      | 0.569  |
| C47  | 1 | 0.39809 |        | 0.60191 |      | 0.1314  | Biso | 1      | C      | 0.019  |
| C48  | 1 | 0.3901  | 0.6099 | 0.0892  | Biso | 1       | C    | -0.139 |        |        |
| H117 | 1 | 0.4062  | 0.5938 | 0.0681  | Biso | 1       | H    | 0.125  |        |        |
| C49  | 1 | 0.3626  | 0.6374 | 0.0758  | Biso | 1       | C    | -0.045 |        |        |
| H118 | 1 | 0.359   | 0.641  | 0.0452  | Biso | 1       | H    | 0.101  |        |        |
| C50  | 1 | 0.3359  | 0.6641 | 0.105   | Biso | 1       | C    | -0.265 |        |        |
| H119 | 1 | 0.3153  | 0.6847 | 0.0945  | Biso | 1       | H    | 0.138  |        |        |
| C51  | 1 | 0.34289 |        | 0.65711 |      | 0.1499  | Biso | 1      | C      | 0.266  |
| C52  | 1 | 0.37476 |        | 0.62524 |      | 0.1648  | Biso | 1      | C      | -0.234 |
| H120 | 1 | 0.3799  | 0.6201 | 0.1949  | Biso | 1       | H    | 0.162  |        |        |
| C53  | 1 | 0.28793 |        | 0.71207 |      | 0.1686  | Biso | 1      | C      | -0.072 |
| C54  | 1 | 0.26889 |        | 0.73111 |      | 0.21027 | Biso | 1      | C      | 0.011  |
| O16  | 1 | 0.4361  | 0.5639 | 0.18911 |      | Biso    | 1    | O      | -0.413 |        |
| O17  | 1 | 0.45252 |        | 0.54748 |      | 0.11998 | Biso | 1      | O      | -0.481 |
| O18  | 1 | 0.32082 |        | 0.67918 |      | 0.18225 | Biso | 1      | O      | -0.190 |
| C55  | 1 | 0.06793 |        | 0.93207 |      | 0.6482  | Biso | 1      | C      | 0.569  |
| C56  | 1 | 0.10191 |        | 0.89809 |      | 0.6314  | Biso | 1      | C      | 0.019  |
| C57  | 1 | 0.1099  | 0.8901 | 0.5892  | Biso | 1       | C    | -0.139 |        |        |
| H121 | 1 | 0.0938  | 0.9062 | 0.5681  | Biso | 1       | H    | 0.125  |        |        |
| C58  | 1 | 0.1374  | 0.8626 | 0.5758  | Biso | 1       | C    | -0.044 |        |        |
| H122 | 1 | 0.141   | 0.859  | 0.5452  | Biso | 1       | H    | 0.101  |        |        |
| C59  | 1 | 0.1641  | 0.8359 | 0.605   | Biso | 1       | C    | -0.265 |        |        |
| H123 | 1 | 0.1847  | 0.8153 | 0.5945  | Biso | 1       | H    | 0.138  |        |        |
| C60  | 1 | 0.15711 |        | 0.84289 |      | 0.6499  | Biso | 1      | C      | 0.266  |
| C61  | 1 | 0.12524 |        | 0.87476 |      | 0.6648  | Biso | 1      | C      | -0.234 |
| H124 | 1 | 0.1201  | 0.8799 | 0.6949  | Biso | 1       | H    | 0.162  |        |        |
| C62  | 1 | 0.21207 |        | 0.78793 |      | 0.6686  | Biso | 1      | C      | -0.074 |
| C63  | 1 | 0.23111 |        | 0.76889 |      | 0.71027 | Biso | 1      | C      | 0.010  |
| O19  | 1 | 0.0639  | 0.9361 | 0.68911 |      | Biso    | 1    | O      | -0.413 |        |
| O20  | 1 | 0.04748 |        | 0.95252 |      | 0.61998 | Biso | 1      | O      | -0.480 |
| O21  | 1 | 0.17918 |        | 0.82082 |      | 0.68225 | Biso | 1      | O      | -0.189 |
| C64  | 1 | 0.56793 |        | 0.43207 |      | 0.1482  | Biso | 1      | C      | 0.569  |
| C65  | 1 | 0.60191 |        | 0.39809 |      | 0.1314  | Biso | 1      | C      | 0.019  |
| C66  | 1 | 0.6099  | 0.3901 | 0.0892  | Biso | 1       | C    | -0.138 |        |        |
| H125 | 1 | 0.5938  | 0.4062 | 0.0681  | Biso | 1       | H    | 0.125  |        |        |
| C67  | 1 | 0.6374  | 0.3626 | 0.0758  | Biso | 1       | C    | -0.044 |        |        |
| H126 | 1 | 0.641   | 0.359  | 0.0452  | Biso | 1       | H    | 0.101  |        |        |
| C68  | 1 | 0.6641  | 0.3359 | 0.105   | Biso | 1       | C    | -0.265 |        |        |
| H127 | 1 | 0.6847  | 0.3153 | 0.0945  | Biso | 1       | H    | 0.138  |        |        |
| C69  | 1 | 0.65711 |        | 0.34289 |      | 0.1499  | Biso | 1      | C      | 0.266  |
| C70  | 1 | 0.62524 |        | 0.37476 |      | 0.1648  | Biso | 1      | C      | -0.234 |
| H128 | 1 | 0.6201  | 0.3799 | 0.1949  | Biso | 1       | H    | 0.162  |        |        |
| C71  | 1 | 0.71207 |        | 0.28793 |      | 0.1686  | Biso | 1      | C      | -0.072 |
| C72  | 1 | 0.73111 |        | 0.26889 |      | 0.21027 | Biso | 1      | C      | 0.011  |
| O22  | 1 | 0.5639  | 0.4361 | 0.18911 |      | Biso    | 1    | O      | -0.413 |        |

|      |   |         |         |         |      |   |   |        |
|------|---|---------|---------|---------|------|---|---|--------|
| O23  | 1 | 0.54748 | 0.45252 | 0.11998 | Biso | 1 | O | -0.481 |
| O24  | 1 | 0.67918 | 0.32082 | 0.18225 | Biso | 1 | O | -0.189 |
| C73  | 1 | 0.3518  | 0.06793 | 0.06793 | Biso | 1 | C | 0.569  |
| C74  | 1 | 0.3686  | 0.10191 | 0.10191 | Biso | 1 | C | 0.019  |
| C75  | 1 | 0.4108  | 0.1099  | 0.1099  | Biso | 1 | C | -0.136 |
| H129 | 1 | 0.4319  | 0.0938  | 0.0938  | Biso | 1 | H | 0.123  |
| C76  | 1 | 0.4242  | 0.1374  | 0.1374  | Biso | 1 | C | -0.045 |
| H130 | 1 | 0.4548  | 0.141   | 0.141   | Biso | 1 | H | 0.101  |
| C77  | 1 | 0.395   | 0.1641  | 0.1641  | Biso | 1 | C | -0.265 |
| H131 | 1 | 0.4055  | 0.1847  | 0.1847  | Biso | 1 | H | 0.138  |
| C78  | 1 | 0.3501  | 0.15711 | 0.15711 | Biso | 1 | C | 0.266  |
| C79  | 1 | 0.3352  | 0.12524 | 0.12524 | Biso | 1 | C | -0.235 |
| H132 | 1 | 0.3051  | 0.1201  | 0.1201  | Biso | 1 | H | 0.162  |
| C80  | 1 | 0.3314  | 0.21207 | 0.21207 | Biso | 1 | C | -0.074 |
| C81  | 1 | 0.28973 | 0.23111 | 0.23111 | Biso | 1 | C | 0.011  |
| O25  | 1 | 0.31089 | 0.0639  | 0.0639  | Biso | 1 | O | -0.413 |
| O26  | 1 | 0.38002 | 0.04748 | 0.04748 | Biso | 1 | O | -0.481 |
| O27  | 1 | 0.31775 | 0.17918 | 0.17918 | Biso | 1 | O | -0.190 |
| C82  | 1 | 0.8518  | 0.56793 | 0.56793 | Biso | 1 | C | 0.568  |
| C83  | 1 | 0.8686  | 0.60191 | 0.60191 | Biso | 1 | C | 0.019  |
| C84  | 1 | 0.9108  | 0.6099  | 0.6099  | Biso | 1 | C | -0.138 |
| H133 | 1 | 0.9319  | 0.5938  | 0.5938  | Biso | 1 | H | 0.125  |
| C85  | 1 | 0.9242  | 0.6374  | 0.6374  | Biso | 1 | C | -0.045 |
| H134 | 1 | 0.9548  | 0.641   | 0.641   | Biso | 1 | H | 0.101  |
| C86  | 1 | 0.895   | 0.6641  | 0.6641  | Biso | 1 | C | -0.265 |
| H135 | 1 | 0.9055  | 0.6847  | 0.6847  | Biso | 1 | H | 0.137  |
| C87  | 1 | 0.8501  | 0.65711 | 0.65711 | Biso | 1 | C | 0.266  |
| C88  | 1 | 0.8352  | 0.62524 | 0.62524 | Biso | 1 | C | -0.234 |
| H136 | 1 | 0.8051  | 0.6201  | 0.6201  | Biso | 1 | H | 0.162  |
| C89  | 1 | 0.8314  | 0.71207 | 0.71207 | Biso | 1 | C | -0.074 |
| C90  | 1 | 0.78973 | 0.73111 | 0.73111 | Biso | 1 | C | 0.010  |
| O28  | 1 | 0.81089 | 0.5639  | 0.5639  | Biso | 1 | O | -0.413 |
| O29  | 1 | 0.88002 | 0.54748 | 0.54748 | Biso | 1 | O | -0.480 |
| O30  | 1 | 0.81775 | 0.67918 | 0.67918 | Biso | 1 | O | -0.189 |
| C91  | 1 | 0.3518  | 0.93207 | 0.93207 | Biso | 1 | C | 0.569  |
| C92  | 1 | 0.3686  | 0.89809 | 0.89809 | Biso | 1 | C | 0.019  |
| C93  | 1 | 0.4108  | 0.8901  | 0.8901  | Biso | 1 | C | -0.136 |
| H137 | 1 | 0.4319  | 0.9062  | 0.9062  | Biso | 1 | H | 0.123  |
| C94  | 1 | 0.4242  | 0.8626  | 0.8626  | Biso | 1 | C | -0.044 |
| H138 | 1 | 0.4548  | 0.859   | 0.859   | Biso | 1 | H | 0.101  |
| C95  | 1 | 0.395   | 0.8359  | 0.8359  | Biso | 1 | C | -0.265 |
| H139 | 1 | 0.4055  | 0.8153  | 0.8153  | Biso | 1 | H | 0.138  |
| C96  | 1 | 0.3501  | 0.84289 | 0.84289 | Biso | 1 | C | 0.266  |
| C97  | 1 | 0.3352  | 0.87476 | 0.87476 | Biso | 1 | C | -0.235 |
| H140 | 1 | 0.3051  | 0.8799  | 0.8799  | Biso | 1 | H | 0.162  |
| C98  | 1 | 0.3314  | 0.78793 | 0.78793 | Biso | 1 | C | -0.074 |
| C99  | 1 | 0.28973 | 0.76889 | 0.76889 | Biso | 1 | C | 0.010  |
| O31  | 1 | 0.31089 | 0.9361  | 0.9361  | Biso | 1 | O | -0.413 |
| O32  | 1 | 0.38002 | 0.95252 | 0.95252 | Biso | 1 | O | -0.481 |
| O33  | 1 | 0.31775 | 0.82082 | 0.82082 | Biso | 1 | O | -0.189 |
| C100 | 1 | 0.8518  | 0.43207 | 0.43207 | Biso | 1 | C | 0.568  |
| C101 | 1 | 0.8686  | 0.39809 | 0.39809 | Biso | 1 | C | 0.020  |

|      |   |         |         |         |      |   |   |        |  |
|------|---|---------|---------|---------|------|---|---|--------|--|
| C102 | 1 | 0.9108  | 0.3901  | 0.3901  | Biso | 1 | C | -0.137 |  |
| H141 | 1 | 0.9319  | 0.4062  | 0.4062  | Biso | 1 | H | 0.123  |  |
| C103 | 1 | 0.9242  | 0.3626  | 0.3626  | Biso | 1 | C | -0.044 |  |
| H142 | 1 | 0.9548  | 0.359   | 0.359   | Biso | 1 | H | 0.101  |  |
| C104 | 1 | 0.895   | 0.3359  | 0.3359  | Biso | 1 | C | -0.266 |  |
| H143 | 1 | 0.9055  | 0.3153  | 0.3153  | Biso | 1 | H | 0.138  |  |
| C105 | 1 | 0.8501  | 0.34289 | 0.34289 | Biso | 1 | C | 0.266  |  |
| C106 | 1 | 0.8352  | 0.37476 | 0.37476 | Biso | 1 | C | -0.235 |  |
| H144 | 1 | 0.8051  | 0.3799  | 0.3799  | Biso | 1 | H | 0.162  |  |
| C107 | 1 | 0.8314  | 0.28793 | 0.28793 | Biso | 1 | C | -0.074 |  |
| C108 | 1 | 0.78973 | 0.26889 | 0.26889 | Biso | 1 | C | 0.011  |  |
| O34  | 1 | 0.81089 | 0.4361  | 0.4361  | Biso | 1 | O | -0.413 |  |
| O35  | 1 | 0.88002 | 0.45252 | 0.45252 | Biso | 1 | O | -0.480 |  |
| O36  | 1 | 0.81775 | 0.32082 | 0.32082 | Biso | 1 | O | -0.189 |  |
| C109 | 1 | 0.6482  | 0.93207 | 0.06793 | Biso | 1 | C | 0.569  |  |
| C110 | 1 | 0.6314  | 0.89809 | 0.10191 | Biso | 1 | C | 0.019  |  |
| C111 | 1 | 0.5892  | 0.8901  | 0.1099  | Biso | 1 | C | -0.139 |  |
| H145 | 1 | 0.5681  | 0.9062  | 0.0938  | Biso | 1 | H | 0.125  |  |
| C112 | 1 | 0.5758  | 0.8626  | 0.1374  | Biso | 1 | C | -0.045 |  |
| H146 | 1 | 0.5452  | 0.859   | 0.141   | Biso | 1 | H | 0.101  |  |
| C113 | 1 | 0.605   | 0.8359  | 0.1641  | Biso | 1 | C | -0.265 |  |
| H147 | 1 | 0.5945  | 0.8153  | 0.1847  | Biso | 1 | H | 0.138  |  |
| C114 | 1 | 0.6499  | 0.84289 | 0.15711 | Biso | 1 | C | 0.266  |  |
| C115 | 1 | 0.6648  | 0.87476 | 0.12524 | Biso | 1 | C | -0.235 |  |
| H148 | 1 | 0.6949  | 0.8799  | 0.1201  | Biso | 1 | H | 0.162  |  |
| C116 | 1 | 0.6686  | 0.78793 | 0.21207 | Biso | 1 | C | -0.074 |  |
| C117 | 1 | 0.71027 | 0.76889 | 0.23111 | Biso | 1 | C | 0.011  |  |
| O37  | 1 | 0.68911 | 0.9361  | 0.0639  | Biso | 1 | O | -0.413 |  |
| O38  | 1 | 0.61998 | 0.95252 | 0.04748 | Biso | 1 | O | -0.481 |  |
| O39  | 1 | 0.68225 | 0.82082 | 0.17918 | Biso | 1 | O | -0.190 |  |
| C118 | 1 | 0.1482  | 0.43207 | 0.56793 | Biso | 1 | C | 0.569  |  |
| C119 | 1 | 0.1314  | 0.39809 | 0.60191 | Biso | 1 | C | 0.019  |  |
| C120 | 1 | 0.0892  | 0.3901  | 0.6099  | Biso | 1 | C | -0.138 |  |
| H149 | 1 | 0.0681  | 0.4062  | 0.5938  | Biso | 1 | H | 0.125  |  |
| C121 | 1 | 0.0758  | 0.3626  | 0.6374  | Biso | 1 | C | -0.045 |  |
| H150 | 1 | 0.0452  | 0.359   | 0.641   | Biso | 1 | H | 0.101  |  |
| C122 | 1 | 0.105   | 0.3359  | 0.6641  | Biso | 1 | C | -0.265 |  |
| H151 | 1 | 0.0945  | 0.3153  | 0.6847  | Biso | 1 | H | 0.138  |  |
| C123 | 1 | 0.1499  | 0.34289 | 0.65711 | Biso | 1 | C | 0.266  |  |
| C124 | 1 | 0.1648  | 0.37476 | 0.62524 | Biso | 1 | C | -0.235 |  |
| H152 | 1 | 0.1949  | 0.3799  | 0.6201  | Biso | 1 | H | 0.162  |  |
| C125 | 1 | 0.1686  | 0.28793 | 0.71207 | Biso | 1 | C | -0.072 |  |
| C126 | 1 | 0.21027 | 0.26889 | 0.73111 | Biso | 1 | C | 0.011  |  |
| O40  | 1 | 0.18911 | 0.4361  | 0.5639  | Biso | 1 | O | -0.413 |  |
| O41  | 1 | 0.11998 | 0.45252 | 0.54748 | Biso | 1 | O | -0.481 |  |
| O42  | 1 | 0.18225 | 0.32082 | 0.67918 | Biso | 1 | O | -0.189 |  |
| C127 | 1 | 0.6482  | 0.06793 | 0.93207 | Biso | 1 | C | 0.569  |  |
| C128 | 1 | 0.6314  | 0.10191 | 0.89809 | Biso | 1 | C | 0.019  |  |
| C129 | 1 | 0.5892  | 0.1099  | 0.8901  | Biso | 1 | C | -0.139 |  |
| H153 | 1 | 0.5681  | 0.0938  | 0.9062  | Biso | 1 | H | 0.125  |  |
| C130 | 1 | 0.5758  | 0.1374  | 0.8626  | Biso | 1 | C | -0.044 |  |
| H154 | 1 | 0.5452  | 0.141   | 0.859   | Biso | 1 | H | 0.101  |  |

|      |   |         |         |         |      |   |   |        |  |
|------|---|---------|---------|---------|------|---|---|--------|--|
| C131 | 1 | 0.605   | 0.1641  | 0.8359  | Biso | 1 | C | -0.265 |  |
| H155 | 1 | 0.5945  | 0.1847  | 0.8153  | Biso | 1 | H | 0.138  |  |
| C132 | 1 | 0.6499  | 0.15711 | 0.84289 | Biso | 1 | C | 0.266  |  |
| C133 | 1 | 0.6648  | 0.12524 | 0.87476 | Biso | 1 | C | -0.234 |  |
| H156 | 1 | 0.6949  | 0.1201  | 0.8799  | Biso | 1 | H | 0.162  |  |
| C134 | 1 | 0.6686  | 0.21207 | 0.78793 | Biso | 1 | C | -0.074 |  |
| C135 | 1 | 0.71027 | 0.23111 | 0.76889 | Biso | 1 | C | 0.011  |  |
| O43  | 1 | 0.68911 | 0.0639  | 0.9361  | Biso | 1 | O | -0.413 |  |
| O44  | 1 | 0.61998 | 0.04748 | 0.95252 | Biso | 1 | O | -0.481 |  |
| O45  | 1 | 0.68225 | 0.17918 | 0.82082 | Biso | 1 | O | -0.190 |  |
| C136 | 1 | 0.1482  | 0.56793 | 0.43207 | Biso | 1 | C | 0.569  |  |
| C137 | 1 | 0.1314  | 0.60191 | 0.39809 | Biso | 1 | C | 0.019  |  |
| C138 | 1 | 0.0892  | 0.6099  | 0.3901  | Biso | 1 | C | -0.138 |  |
| H157 | 1 | 0.0681  | 0.5938  | 0.4062  | Biso | 1 | H | 0.125  |  |
| C139 | 1 | 0.0758  | 0.6374  | 0.3626  | Biso | 1 | C | -0.045 |  |
| H158 | 1 | 0.0452  | 0.641   | 0.359   | Biso | 1 | H | 0.101  |  |
| C140 | 1 | 0.105   | 0.6641  | 0.3359  | Biso | 1 | C | -0.265 |  |
| H159 | 1 | 0.0945  | 0.6847  | 0.3153  | Biso | 1 | H | 0.138  |  |
| C141 | 1 | 0.1499  | 0.65711 | 0.34289 | Biso | 1 | C | 0.266  |  |
| C142 | 1 | 0.1648  | 0.62524 | 0.37476 | Biso | 1 | C | -0.235 |  |
| H160 | 1 | 0.1949  | 0.6201  | 0.3799  | Biso | 1 | H | 0.162  |  |
| C143 | 1 | 0.1686  | 0.71207 | 0.28793 | Biso | 1 | C | -0.072 |  |
| C144 | 1 | 0.21027 | 0.73111 | 0.26889 | Biso | 1 | C | 0.011  |  |
| O46  | 1 | 0.18911 | 0.5639  | 0.4361  | Biso | 1 | O | -0.413 |  |
| O47  | 1 | 0.11998 | 0.54748 | 0.45252 | Biso | 1 | O | -0.481 |  |
| O48  | 1 | 0.18225 | 0.67918 | 0.32082 | Biso | 1 | O | -0.189 |  |
| C145 | 1 | 0.06793 | 0.3518  | 0.06793 | Biso | 1 | C | 0.569  |  |
| C146 | 1 | 0.10191 | 0.3686  | 0.10191 | Biso | 1 | C | 0.019  |  |
| C147 | 1 | 0.1099  | 0.4108  | 0.1099  | Biso | 1 | C | -0.136 |  |
| H161 | 1 | 0.0938  | 0.4319  | 0.0938  | Biso | 1 | H | 0.123  |  |
| C148 | 1 | 0.1374  | 0.4242  | 0.1374  | Biso | 1 | C | -0.045 |  |
| H162 | 1 | 0.141   | 0.4548  | 0.141   | Biso | 1 | H | 0.101  |  |
| C149 | 1 | 0.1641  | 0.395   | 0.1641  | Biso | 1 | C | -0.265 |  |
| H163 | 1 | 0.1847  | 0.4055  | 0.1847  | Biso | 1 | H | 0.138  |  |
| C150 | 1 | 0.15711 | 0.3501  | 0.15711 | Biso | 1 | C | 0.266  |  |
| C151 | 1 | 0.12524 | 0.3352  | 0.12524 | Biso | 1 | C | -0.235 |  |
| H164 | 1 | 0.1201  | 0.3051  | 0.1201  | Biso | 1 | H | 0.162  |  |
| C152 | 1 | 0.21207 | 0.3314  | 0.21207 | Biso | 1 | C | -0.074 |  |
| C153 | 1 | 0.23111 | 0.28973 | 0.23111 | Biso | 1 | C | 0.011  |  |
| O49  | 1 | 0.0639  | 0.31089 | 0.0639  | Biso | 1 | O | -0.412 |  |
| O50  | 1 | 0.04748 | 0.38002 | 0.04748 | Biso | 1 | O | -0.481 |  |
| O51  | 1 | 0.17918 | 0.31775 | 0.17918 | Biso | 1 | O | -0.189 |  |
| C154 | 1 | 0.56793 | 0.8518  | 0.56793 | Biso | 1 | C | 0.568  |  |
| C155 | 1 | 0.60191 | 0.8686  | 0.60191 | Biso | 1 | C | 0.019  |  |
| C156 | 1 | 0.6099  | 0.9108  | 0.6099  | Biso | 1 | C | -0.138 |  |
| H165 | 1 | 0.5938  | 0.9319  | 0.5938  | Biso | 1 | H | 0.125  |  |
| C157 | 1 | 0.6374  | 0.9242  | 0.6374  | Biso | 1 | C | -0.045 |  |
| H166 | 1 | 0.641   | 0.9548  | 0.641   | Biso | 1 | H | 0.101  |  |
| C158 | 1 | 0.6641  | 0.895   | 0.6641  | Biso | 1 | C | -0.265 |  |
| H167 | 1 | 0.6847  | 0.9055  | 0.6847  | Biso | 1 | H | 0.137  |  |
| C159 | 1 | 0.65711 | 0.8501  | 0.65711 | Biso | 1 | C | 0.266  |  |
| C160 | 1 | 0.62524 | 0.8352  | 0.62524 | Biso | 1 | C | -0.234 |  |

|      |   |         |         |         |         |         |      |        |        |        |
|------|---|---------|---------|---------|---------|---------|------|--------|--------|--------|
| H168 | 1 | 0.6201  | 0.8051  | 0.6201  | Biso    | 1       | H    | 0.162  |        |        |
| C161 | 1 | 0.71207 |         | 0.8314  | 0.71207 |         | Biso | 1      | C      | -0.074 |
| C162 | 1 | 0.73111 |         | 0.78973 |         | 0.73111 | Biso | 1      | C      | 0.011  |
| O52  | 1 | 0.5639  | 0.81089 |         | 0.5639  | Biso    | 1    | O      | -0.412 |        |
| O53  | 1 | 0.54748 |         | 0.88002 |         | 0.54748 | Biso | 1      | O      | -0.480 |
| O54  | 1 | 0.67918 |         | 0.81775 |         | 0.67918 | Biso | 1      | O      | -0.189 |
| C163 | 1 | 0.93207 |         | 0.3518  | 0.93207 |         | Biso | 1      | C      | 0.569  |
| C164 | 1 | 0.89809 |         | 0.3686  | 0.89809 |         | Biso | 1      | C      | 0.019  |
| C165 | 1 | 0.8901  | 0.4108  | 0.8901  | Biso    | 1       | C    | -0.136 |        |        |
| H169 | 1 | 0.9062  | 0.4319  | 0.9062  | Biso    | 1       | H    | 0.123  |        |        |
| C166 | 1 | 0.8626  | 0.4242  | 0.8626  | Biso    | 1       | C    | -0.045 |        |        |
| H170 | 1 | 0.859   | 0.4548  | 0.859   | Biso    | 1       | H    | 0.101  |        |        |
| C167 | 1 | 0.8359  | 0.395   | 0.8359  | Biso    | 1       | C    | -0.265 |        |        |
| H171 | 1 | 0.8153  | 0.4055  | 0.8153  | Biso    | 1       | H    | 0.138  |        |        |
| C168 | 1 | 0.84289 |         | 0.3501  | 0.84289 |         | Biso | 1      | C      | 0.266  |
| C169 | 1 | 0.87476 |         | 0.3352  | 0.87476 |         | Biso | 1      | C      | -0.235 |
| H172 | 1 | 0.8799  | 0.3051  | 0.8799  | Biso    | 1       | H    | 0.162  |        |        |
| C170 | 1 | 0.78793 |         | 0.3314  | 0.78793 |         | Biso | 1      | C      | -0.074 |
| C171 | 1 | 0.76889 |         | 0.28973 |         | 0.76889 | Biso | 1      | C      | 0.010  |
| O55  | 1 | 0.9361  | 0.31089 |         | 0.9361  | Biso    | 1    | O      | -0.412 |        |
| O56  | 1 | 0.95252 |         | 0.38002 |         | 0.95252 | Biso | 1      | O      | -0.482 |
| O57  | 1 | 0.82082 |         | 0.31775 |         | 0.82082 | Biso | 1      | O      | -0.189 |
| C172 | 1 | 0.43207 |         | 0.8518  | 0.43207 |         | Biso | 1      | C      | 0.568  |
| C173 | 1 | 0.39809 |         | 0.8686  | 0.39809 |         | Biso | 1      | C      | 0.020  |
| C174 | 1 | 0.3901  | 0.9108  | 0.3901  | Biso    | 1       | C    | -0.137 |        |        |
| H173 | 1 | 0.4062  | 0.9319  | 0.4062  | Biso    | 1       | H    | 0.123  |        |        |
| C175 | 1 | 0.3626  | 0.9242  | 0.3626  | Biso    | 1       | C    | -0.044 |        |        |
| H174 | 1 | 0.359   | 0.9548  | 0.359   | Biso    | 1       | H    | 0.101  |        |        |
| C176 | 1 | 0.3359  | 0.895   | 0.3359  | Biso    | 1       | C    | -0.266 |        |        |
| H175 | 1 | 0.3153  | 0.9055  | 0.3153  | Biso    | 1       | H    | 0.138  |        |        |
| C177 | 1 | 0.34289 |         | 0.8501  | 0.34289 |         | Biso | 1      | C      | 0.266  |
| C178 | 1 | 0.37476 |         | 0.8352  | 0.37476 |         | Biso | 1      | C      | -0.234 |
| H176 | 1 | 0.3799  | 0.8051  | 0.3799  | Biso    | 1       | H    | 0.162  |        |        |
| C179 | 1 | 0.28793 |         | 0.8314  | 0.28793 |         | Biso | 1      | C      | -0.074 |
| C180 | 1 | 0.26889 |         | 0.78973 |         | 0.26889 | Biso | 1      | C      | 0.011  |
| O58  | 1 | 0.4361  | 0.81089 |         | 0.4361  | Biso    | 1    | O      | -0.413 |        |
| O59  | 1 | 0.45252 |         | 0.88002 |         | 0.45252 | Biso | 1      | O      | -0.481 |
| O60  | 1 | 0.32082 |         | 0.81775 |         | 0.32082 | Biso | 1      | O      | -0.189 |
| C181 | 1 | 0.06793 |         | 0.6482  | 0.93207 |         | Biso | 1      | C      | 0.569  |
| C182 | 1 | 0.10191 |         | 0.6314  | 0.89809 |         | Biso | 1      | C      | 0.019  |
| C183 | 1 | 0.1099  | 0.5892  | 0.8901  | Biso    | 1       | C    | -0.139 |        |        |
| H177 | 1 | 0.0938  | 0.5681  | 0.9062  | Biso    | 1       | H    | 0.125  |        |        |
| C184 | 1 | 0.1374  | 0.5758  | 0.8626  | Biso    | 1       | C    | -0.044 |        |        |
| H178 | 1 | 0.141   | 0.5452  | 0.859   | Biso    | 1       | H    | 0.101  |        |        |
| C185 | 1 | 0.1641  | 0.605   | 0.8359  | Biso    | 1       | C    | -0.265 |        |        |
| H179 | 1 | 0.1847  | 0.5945  | 0.8153  | Biso    | 1       | H    | 0.138  |        |        |
| C186 | 1 | 0.15711 |         | 0.6499  | 0.84289 |         | Biso | 1      | C      | 0.266  |
| C187 | 1 | 0.12524 |         | 0.6648  | 0.87476 |         | Biso | 1      | C      | -0.235 |
| H180 | 1 | 0.1201  | 0.6949  | 0.8799  | Biso    | 1       | H    | 0.162  |        |        |
| C188 | 1 | 0.21207 |         | 0.6686  | 0.78793 |         | Biso | 1      | C      | -0.074 |
| C189 | 1 | 0.23111 |         | 0.71027 |         | 0.76889 | Biso | 1      | C      | 0.011  |
| O61  | 1 | 0.0639  | 0.68911 |         | 0.9361  | Biso    | 1    | O      | -0.413 |        |

|      |   |         |         |         |      |   |   |        |
|------|---|---------|---------|---------|------|---|---|--------|
| O62  | 1 | 0.04748 | 0.61998 | 0.95252 | Biso | 1 | O | -0.480 |
| O63  | 1 | 0.17918 | 0.68225 | 0.82082 | Biso | 1 | O | -0.189 |
| C190 | 1 | 0.56793 | 0.1482  | 0.43207 | Biso | 1 | C | 0.569  |
| C191 | 1 | 0.60191 | 0.1314  | 0.39809 | Biso | 1 | C | 0.019  |
| C192 | 1 | 0.6099  | 0.0892  | 0.3901  | Biso | 1 | C | -0.138 |
| H181 | 1 | 0.5938  | 0.0681  | 0.4062  | Biso | 1 | H | 0.125  |
| C193 | 1 | 0.6374  | 0.0758  | 0.3626  | Biso | 1 | C | -0.045 |
| H182 | 1 | 0.641   | 0.0452  | 0.359   | Biso | 1 | H | 0.101  |
| C194 | 1 | 0.6641  | 0.105   | 0.3359  | Biso | 1 | C | -0.265 |
| H183 | 1 | 0.6847  | 0.0945  | 0.3153  | Biso | 1 | H | 0.138  |
| C195 | 1 | 0.65711 | 0.1499  | 0.34289 | Biso | 1 | C | 0.266  |
| C196 | 1 | 0.62524 | 0.1648  | 0.37476 | Biso | 1 | C | -0.234 |
| H184 | 1 | 0.6201  | 0.1949  | 0.3799  | Biso | 1 | H | 0.162  |
| C197 | 1 | 0.71207 | 0.1686  | 0.28793 | Biso | 1 | C | -0.072 |
| C198 | 1 | 0.73111 | 0.21027 | 0.26889 | Biso | 1 | C | 0.011  |
| O64  | 1 | 0.5639  | 0.18911 | 0.4361  | Biso | 1 | O | -0.413 |
| O65  | 1 | 0.54748 | 0.11998 | 0.45252 | Biso | 1 | O | -0.480 |
| O66  | 1 | 0.67918 | 0.18225 | 0.32082 | Biso | 1 | O | -0.189 |
| C199 | 1 | 0.93207 | 0.6482  | 0.06793 | Biso | 1 | C | 0.569  |
| C200 | 1 | 0.89809 | 0.6314  | 0.10191 | Biso | 1 | C | 0.019  |
| C201 | 1 | 0.8901  | 0.5892  | 0.1099  | Biso | 1 | C | -0.139 |
| H185 | 1 | 0.9062  | 0.5681  | 0.0938  | Biso | 1 | H | 0.125  |
| C202 | 1 | 0.8626  | 0.5758  | 0.1374  | Biso | 1 | C | -0.044 |
| H186 | 1 | 0.859   | 0.5452  | 0.141   | Biso | 1 | H | 0.101  |
| C203 | 1 | 0.8359  | 0.605   | 0.1641  | Biso | 1 | C | -0.265 |
| H187 | 1 | 0.8153  | 0.5945  | 0.1847  | Biso | 1 | H | 0.138  |
| C204 | 1 | 0.84289 | 0.6499  | 0.15711 | Biso | 1 | C | 0.266  |
| C205 | 1 | 0.87476 | 0.6648  | 0.12524 | Biso | 1 | C | -0.234 |
| H188 | 1 | 0.8799  | 0.6949  | 0.1201  | Biso | 1 | H | 0.162  |
| C206 | 1 | 0.78793 | 0.6686  | 0.21207 | Biso | 1 | C | -0.074 |
| C207 | 1 | 0.76889 | 0.71027 | 0.23111 | Biso | 1 | C | 0.011  |
| O67  | 1 | 0.9361  | 0.68911 | 0.0639  | Biso | 1 | O | -0.414 |
| O68  | 1 | 0.95252 | 0.61998 | 0.04748 | Biso | 1 | O | -0.481 |
| O69  | 1 | 0.82082 | 0.68225 | 0.17918 | Biso | 1 | O | -0.189 |
| C208 | 1 | 0.43207 | 0.1482  | 0.56793 | Biso | 1 | C | 0.568  |
| C209 | 1 | 0.39809 | 0.1314  | 0.60191 | Biso | 1 | C | 0.019  |
| C210 | 1 | 0.3901  | 0.0892  | 0.6099  | Biso | 1 | C | -0.138 |
| H189 | 1 | 0.4062  | 0.0681  | 0.5938  | Biso | 1 | H | 0.125  |
| C211 | 1 | 0.3626  | 0.0758  | 0.6374  | Biso | 1 | C | -0.045 |
| H190 | 1 | 0.359   | 0.0452  | 0.641   | Biso | 1 | H | 0.101  |
| C212 | 1 | 0.3359  | 0.105   | 0.6641  | Biso | 1 | C | -0.265 |
| H191 | 1 | 0.3153  | 0.0945  | 0.6847  | Biso | 1 | H | 0.138  |
| C213 | 1 | 0.34289 | 0.1499  | 0.65711 | Biso | 1 | C | 0.266  |
| C214 | 1 | 0.37476 | 0.1648  | 0.62524 | Biso | 1 | C | -0.234 |
| H192 | 1 | 0.3799  | 0.1949  | 0.6201  | Biso | 1 | H | 0.162  |
| C215 | 1 | 0.28793 | 0.1686  | 0.71207 | Biso | 1 | C | -0.072 |
| C216 | 1 | 0.26889 | 0.21027 | 0.73111 | Biso | 1 | C | 0.011  |
| O70  | 1 | 0.4361  | 0.18911 | 0.5639  | Biso | 1 | O | -0.413 |
| O71  | 1 | 0.45252 | 0.11998 | 0.54748 | Biso | 1 | O | -0.480 |
| O72  | 1 | 0.32082 | 0.18225 | 0.67918 | Biso | 1 | O | -0.189 |
| C217 | 1 | 0.06793 | 0.06793 | 0.6482  | Biso | 1 | C | 0.569  |
| C218 | 1 | 0.10191 | 0.10191 | 0.6314  | Biso | 1 | C | 0.019  |

|      |   |         |        |         |         |      |   |        |        |
|------|---|---------|--------|---------|---------|------|---|--------|--------|
| C219 | 1 | 0.1099  | 0.1099 | 0.5892  | Biso    | 1    | C | -0.138 |        |
| H193 | 1 | 0.0938  | 0.0938 | 0.5681  | Biso    | 1    | H | 0.125  |        |
| C220 | 1 | 0.1374  | 0.1374 | 0.5758  | Biso    | 1    | C | -0.045 |        |
| H194 | 1 | 0.141   | 0.141  | 0.5452  | Biso    | 1    | H | 0.101  |        |
| C221 | 1 | 0.1641  | 0.1641 | 0.605   | Biso    | 1    | C | -0.265 |        |
| H195 | 1 | 0.1847  | 0.1847 | 0.5945  | Biso    | 1    | H | 0.138  |        |
| C222 | 1 | 0.15711 |        | 0.15711 | 0.6499  | Biso | 1 | C      | 0.266  |
| C223 | 1 | 0.12524 |        | 0.12524 | 0.6648  | Biso | 1 | C      | -0.235 |
| H196 | 1 | 0.1201  | 0.1201 | 0.6949  | Biso    | 1    | H | 0.162  |        |
| C224 | 1 | 0.21207 |        | 0.21207 | 0.6686  | Biso | 1 | C      | -0.074 |
| C225 | 1 | 0.23111 |        | 0.23111 | 0.71027 | Biso | 1 | C      | 0.011  |
| O73  | 1 | 0.0639  | 0.0639 | 0.68911 | Biso    | 1    | O | -0.414 |        |
| O74  | 1 | 0.04748 |        | 0.04748 | 0.61998 | Biso | 1 | O      | -0.480 |
| O75  | 1 | 0.17918 |        | 0.17918 | 0.68225 | Biso | 1 | O      | -0.189 |
| C226 | 1 | 0.56793 |        | 0.56793 | 0.1482  | Biso | 1 | C      | 0.568  |
| C227 | 1 | 0.60191 |        | 0.60191 | 0.1314  | Biso | 1 | C      | 0.019  |
| C228 | 1 | 0.6099  | 0.6099 | 0.0892  | Biso    | 1    | C | -0.138 |        |
| H197 | 1 | 0.5938  | 0.5938 | 0.0681  | Biso    | 1    | H | 0.125  |        |
| C229 | 1 | 0.6374  | 0.6374 | 0.0758  | Biso    | 1    | C | -0.045 |        |
| H198 | 1 | 0.641   | 0.641  | 0.0452  | Biso    | 1    | H | 0.101  |        |
| C230 | 1 | 0.6641  | 0.6641 | 0.105   | Biso    | 1    | C | -0.264 |        |
| H199 | 1 | 0.6847  | 0.6847 | 0.0945  | Biso    | 1    | H | 0.138  |        |
| C231 | 1 | 0.65711 |        | 0.65711 | 0.1499  | Biso | 1 | C      | 0.266  |
| C232 | 1 | 0.62524 |        | 0.62524 | 0.1648  | Biso | 1 | C      | -0.235 |
| H200 | 1 | 0.6201  | 0.6201 | 0.1949  | Biso    | 1    | H | 0.162  |        |
| C233 | 1 | 0.71207 |        | 0.71207 | 0.1686  | Biso | 1 | C      | -0.074 |
| C234 | 1 | 0.73111 |        | 0.73111 | 0.21027 | Biso | 1 | C      | 0.011  |
| O76  | 1 | 0.5639  | 0.5639 | 0.18911 | Biso    | 1    | O | -0.413 |        |
| O77  | 1 | 0.54748 |        | 0.54748 | 0.11998 | Biso | 1 | O      | -0.479 |
| O78  | 1 | 0.67918 |        | 0.67918 | 0.18225 | Biso | 1 | O      | -0.189 |
| C235 | 1 | 0.93207 |        | 0.93207 | 0.6482  | Biso | 1 | C      | 0.569  |
| C236 | 1 | 0.89809 |        | 0.89809 | 0.6314  | Biso | 1 | C      | 0.019  |
| C237 | 1 | 0.8901  | 0.8901 | 0.5892  | Biso    | 1    | C | -0.136 |        |
| H201 | 1 | 0.9062  | 0.9062 | 0.5681  | Biso    | 1    | H | 0.123  |        |
| C238 | 1 | 0.8626  | 0.8626 | 0.5758  | Biso    | 1    | C | -0.044 |        |
| H202 | 1 | 0.859   | 0.859  | 0.5452  | Biso    | 1    | H | 0.101  |        |
| C239 | 1 | 0.8359  | 0.8359 | 0.605   | Biso    | 1    | C | -0.265 |        |
| H203 | 1 | 0.8153  | 0.8153 | 0.5945  | Biso    | 1    | H | 0.138  |        |
| C240 | 1 | 0.84289 |        | 0.84289 | 0.6499  | Biso | 1 | C      | 0.266  |
| C241 | 1 | 0.87476 |        | 0.87476 | 0.6648  | Biso | 1 | C      | -0.235 |
| H204 | 1 | 0.8799  | 0.8799 | 0.6949  | Biso    | 1    | H | 0.162  |        |
| C242 | 1 | 0.78793 |        | 0.78793 | 0.6686  | Biso | 1 | C      | -0.075 |
| C243 | 1 | 0.76889 |        | 0.76889 | 0.71027 | Biso | 1 | C      | 0.011  |
| O79  | 1 | 0.9361  | 0.9361 | 0.68911 | Biso    | 1    | O | -0.414 |        |
| O80  | 1 | 0.95252 |        | 0.95252 | 0.61998 | Biso | 1 | O      | -0.481 |
| O81  | 1 | 0.82082 |        | 0.82082 | 0.68225 | Biso | 1 | O      | -0.189 |
| C244 | 1 | 0.43207 |        | 0.43207 | 0.1482  | Biso | 1 | C      | 0.568  |
| C245 | 1 | 0.39809 |        | 0.39809 | 0.1314  | Biso | 1 | C      | 0.019  |
| C246 | 1 | 0.3901  | 0.3901 | 0.0892  | Biso    | 1    | C | -0.137 |        |
| H205 | 1 | 0.4062  | 0.4062 | 0.0681  | Biso    | 1    | H | 0.123  |        |
| C247 | 1 | 0.3626  | 0.3626 | 0.0758  | Biso    | 1    | C | -0.044 |        |
| H206 | 1 | 0.359   | 0.359  | 0.0452  | Biso    | 1    | H | 0.101  |        |

|      |   |         |        |         |      |         |      |        |      |        |        |        |        |
|------|---|---------|--------|---------|------|---------|------|--------|------|--------|--------|--------|--------|
| C248 | 1 | 0.3359  | 0.3359 | 0.105   | Biso | 1       | C    | -0.266 |      |        |        |        |        |
| H207 | 1 | 0.3153  | 0.3153 | 0.0945  | Biso | 1       | H    | 0.138  |      |        |        |        |        |
| C249 | 1 | 0.34289 |        | 0.34289 |      | 0.1499  | Biso | 1      | C    | 0.266  |        |        |        |
| C250 | 1 | 0.37476 |        | 0.37476 |      | 0.1648  | Biso | 1      | C    | -0.235 |        |        |        |
| H208 | 1 | 0.3799  | 0.3799 | 0.1949  | Biso | 1       | H    | 0.162  |      |        |        |        |        |
| C251 | 1 | 0.28793 |        | 0.28793 |      | 0.1686  | Biso | 1      | C    | -0.074 |        |        |        |
| C252 | 1 | 0.26889 |        | 0.26889 |      | 0.21027 |      | Biso   | 1    | C      | 0.011  |        |        |
| O82  | 1 | 0.4361  | 0.4361 | 0.18911 |      |         | Biso | 1      | O    | -0.413 |        |        |        |
| O83  | 1 | 0.45252 |        | 0.45252 |      | 0.11998 |      | Biso   | 1    | O      | -0.480 |        |        |
| O84  | 1 | 0.32082 |        | 0.32082 |      | 0.18225 |      | Biso   | 1    | O      | -0.190 |        |        |
| C253 | 1 | 0.06793 |        | 0.93207 |      | 0.3518  |      | Biso   | 1    | C      | 0.569  |        |        |
| C254 | 1 | 0.10191 |        | 0.89809 |      | 0.3686  |      | Biso   | 1    | C      | 0.019  |        |        |
| C255 | 1 | 0.1099  | 0.8901 | 0.4108  | Biso | 1       | C    | -0.138 |      |        |        |        |        |
| H209 | 1 | 0.0938  | 0.9062 | 0.4319  | Biso | 1       | H    | 0.125  |      |        |        |        |        |
| C256 | 1 | 0.1374  | 0.8626 | 0.4242  | Biso | 1       | C    | -0.045 |      |        |        |        |        |
| H210 | 1 | 0.141   | 0.859  | 0.4548  | Biso | 1       | H    | 0.101  |      |        |        |        |        |
| C257 | 1 | 0.1641  | 0.8359 | 0.395   | Biso | 1       | C    | -0.265 |      |        |        |        |        |
| H211 | 1 | 0.1847  | 0.8153 | 0.4055  | Biso | 1       | H    | 0.138  |      |        |        |        |        |
| C258 | 1 | 0.15711 |        | 0.84289 |      | 0.3501  |      | Biso   | 1    | C      | 0.266  |        |        |
| C259 | 1 | 0.12524 |        | 0.87476 |      | 0.3352  |      | Biso   | 1    | C      | -0.235 |        |        |
| H212 | 1 | 0.1201  | 0.8799 | 0.3051  | Biso | 1       | H    | 0.162  |      |        |        |        |        |
| C260 | 1 | 0.21207 |        | 0.78793 |      | 0.3314  |      | Biso   | 1    | C      | -0.074 |        |        |
| C261 | 1 | 0.23111 |        | 0.76889 |      | 0.28973 |      |        | Biso | 1      | C      | 0.011  |        |
| O85  | 1 | 0.0639  | 0.9361 | 0.31089 |      |         | Biso | 1      | O    | -0.412 |        |        |        |
| O86  | 1 | 0.04748 |        | 0.95252 |      | 0.38002 |      |        | Biso | 1      | O      | -0.481 |        |
| O87  | 1 | 0.17918 |        | 0.82082 |      | 0.31775 |      |        | Biso | 1      | O      | -0.189 |        |
| C262 | 1 | 0.56793 |        | 0.43207 |      | 0.8518  |      |        | Biso | 1      | C      | 0.568  |        |
| C263 | 1 | 0.60191 |        | 0.39809 |      | 0.8686  |      |        | Biso | 1      | C      | 0.019  |        |
| C264 | 1 | 0.6099  | 0.3901 | 0.9108  | Biso | 1       | C    | -0.138 |      |        |        |        |        |
| H213 | 1 | 0.5938  | 0.4062 | 0.9319  | Biso | 1       | H    | 0.125  |      |        |        |        |        |
| C265 | 1 | 0.6374  | 0.3626 | 0.9242  | Biso | 1       | C    | -0.045 |      |        |        |        |        |
| H214 | 1 | 0.641   | 0.359  | 0.9548  | Biso | 1       | H    | 0.101  |      |        |        |        |        |
| C266 | 1 | 0.6641  | 0.3359 | 0.895   | Biso | 1       | C    | -0.265 |      |        |        |        |        |
| H215 | 1 | 0.6847  | 0.3153 | 0.9055  | Biso | 1       | H    | 0.138  |      |        |        |        |        |
| C267 | 1 | 0.65711 |        | 0.34289 |      | 0.8501  |      |        | Biso | 1      | C      | 0.266  |        |
| C268 | 1 | 0.62524 |        | 0.37476 |      | 0.8352  |      |        | Biso | 1      | C      | -0.235 |        |
| H216 | 1 | 0.6201  | 0.3799 | 0.8051  | Biso | 1       | H    | 0.162  |      |        |        |        |        |
| C269 | 1 | 0.71207 |        | 0.28793 |      | 0.8314  |      |        | Biso | 1      | C      | -0.072 |        |
| C270 | 1 | 0.73111 |        | 0.26889 |      | 0.78973 |      |        |      | Biso   | 1      | C      | 0.011  |
| O88  | 1 | 0.5639  | 0.4361 | 0.81089 |      |         | Biso | 1      | O    | -0.412 |        |        |        |
| O89  | 1 | 0.54748 |        | 0.45252 |      | 0.88002 |      |        |      | Biso   | 1      | O      | -0.481 |
| O90  | 1 | 0.67918 |        | 0.32082 |      | 0.81775 |      |        |      | Biso   | 1      | O      | -0.189 |
| C271 | 1 | 0.93207 |        | 0.06793 |      | 0.3518  |      |        |      | Biso   | 1      | C      | 0.569  |
| C272 | 1 | 0.89809 |        | 0.10191 |      | 0.3686  |      |        |      | Biso   | 1      | C      | 0.019  |
| C273 | 1 | 0.8901  | 0.1099 | 0.4108  | Biso | 1       | C    | -0.138 |      |        |        |        |        |
| H217 | 1 | 0.9062  | 0.0938 | 0.4319  | Biso | 1       | H    | 0.125  |      |        |        |        |        |
| C274 | 1 | 0.8626  | 0.1374 | 0.4242  | Biso | 1       | C    | -0.045 |      |        |        |        |        |
| H218 | 1 | 0.859   | 0.141  | 0.4548  | Biso | 1       | H    | 0.101  |      |        |        |        |        |
| C275 | 1 | 0.8359  | 0.1641 | 0.395   | Biso | 1       | C    | -0.265 |      |        |        |        |        |
| H219 | 1 | 0.8153  | 0.1847 | 0.4055  | Biso | 1       | H    | 0.138  |      |        |        |        |        |
| C276 | 1 | 0.84289 |        | 0.15711 |      | 0.3501  |      |        |      | Biso   | 1      | C      | 0.266  |
| C277 | 1 | 0.87476 |        | 0.12524 |      | 0.3352  |      |        |      | Biso   | 1      | C      | -0.235 |

|      |   |         |         |         |         |         |      |       |   |        |        |
|------|---|---------|---------|---------|---------|---------|------|-------|---|--------|--------|
| H220 | 1 | 0.8799  | 0.1201  | 0.3051  | Biso    | 1       | H    | 0.162 |   |        |        |
| C278 | 1 | 0.78793 |         | 0.21207 |         | 0.3314  | Biso | 1     | C | -0.074 |        |
| C279 | 1 | 0.76889 |         | 0.23111 |         | 0.28973 |      | Biso  | 1 | C      | 0.011  |
| O91  | 1 | 0.9361  | 0.0639  | 0.31089 |         | Biso    | 1    | O     |   | -0.412 |        |
| O92  | 1 | 0.95252 |         | 0.04748 |         | 0.38002 |      | Biso  | 1 | O      | -0.481 |
| O93  | 1 | 0.82082 |         | 0.17918 |         | 0.31775 |      | Biso  | 1 | O      | -0.189 |
| C280 | 1 | 0.43207 |         | 0.56793 |         | 0.8518  | Biso | 1     | C | 0.568  |        |
| C281 | 1 | 0.39809 |         | 0.60191 |         | 0.8686  | Biso | 1     | C | 0.019  |        |
| C282 | 1 | 0.3901  | 0.6099  | 0.9108  | Biso    | 1       | C    |       |   | -0.138 |        |
| H221 | 1 | 0.4062  | 0.5938  | 0.9319  | Biso    | 1       | H    | 0.125 |   |        |        |
| C283 | 1 | 0.3626  | 0.6374  | 0.9242  | Biso    | 1       | C    |       |   | -0.045 |        |
| H222 | 1 | 0.359   | 0.641   | 0.9548  | Biso    | 1       | H    | 0.101 |   |        |        |
| C284 | 1 | 0.3359  | 0.6641  | 0.895   | Biso    | 1       | C    |       |   | -0.264 |        |
| H223 | 1 | 0.3153  | 0.6847  | 0.9055  | Biso    | 1       | H    | 0.138 |   |        |        |
| C285 | 1 | 0.34289 |         | 0.65711 |         | 0.8501  | Biso | 1     | C | 0.266  |        |
| C286 | 1 | 0.37476 |         | 0.62524 |         | 0.8352  | Biso | 1     | C | -0.235 |        |
| H224 | 1 | 0.3799  | 0.6201  | 0.8051  | Biso    | 1       | H    | 0.162 |   |        |        |
| C287 | 1 | 0.28793 |         | 0.71207 |         | 0.8314  | Biso | 1     | C | -0.072 |        |
| C288 | 1 | 0.26889 |         | 0.73111 |         | 0.78973 |      | Biso  | 1 | C      | 0.011  |
| O94  | 1 | 0.4361  | 0.5639  | 0.81089 |         | Biso    | 1    | O     |   | -0.412 |        |
| O95  | 1 | 0.45252 |         | 0.54748 |         | 0.88002 |      | Biso  | 1 | O      | -0.481 |
| O96  | 1 | 0.32082 |         | 0.67918 |         | 0.81775 |      | Biso  | 1 | O      | -0.189 |
| C289 | 1 | 0.06793 |         | 0.3518  | 0.93207 |         | Biso | 1     | C | 0.569  |        |
| C290 | 1 | 0.10191 |         | 0.3686  | 0.89809 |         | Biso | 1     | C | 0.019  |        |
| C291 | 1 | 0.1099  | 0.4108  | 0.8901  | Biso    | 1       | C    |       |   | -0.139 |        |
| H225 | 1 | 0.0938  | 0.4319  | 0.9062  | Biso    | 1       | H    | 0.125 |   |        |        |
| C292 | 1 | 0.1374  | 0.4242  | 0.8626  | Biso    | 1       | C    |       |   | -0.044 |        |
| H226 | 1 | 0.141   | 0.4548  | 0.859   | Biso    | 1       | H    | 0.101 |   |        |        |
| C293 | 1 | 0.1641  | 0.395   | 0.8359  | Biso    | 1       | C    |       |   | -0.265 |        |
| H227 | 1 | 0.1847  | 0.4055  | 0.8153  | Biso    | 1       | H    | 0.138 |   |        |        |
| C294 | 1 | 0.15711 |         | 0.3501  | 0.84289 |         | Biso | 1     | C | 0.266  |        |
| C295 | 1 | 0.12524 |         | 0.3352  | 0.87476 |         | Biso | 1     | C | -0.235 |        |
| H228 | 1 | 0.1201  | 0.3051  | 0.8799  | Biso    | 1       | H    | 0.162 |   |        |        |
| C296 | 1 | 0.21207 |         | 0.3314  | 0.78793 |         | Biso | 1     | C | -0.074 |        |
| C297 | 1 | 0.23111 |         | 0.28973 | 0.76889 |         | Biso | 1     | C | 0.011  |        |
| O97  | 1 | 0.0639  | 0.31089 |         | 0.9361  | Biso    | 1    | O     |   | -0.412 |        |
| O98  | 1 | 0.04748 |         | 0.38002 | 0.95252 |         | Biso | 1     | O | -0.481 |        |
| O99  | 1 | 0.17918 |         | 0.31775 | 0.82082 |         | Biso | 1     | O | -0.189 |        |
| C298 | 1 | 0.56793 |         | 0.8518  | 0.43207 |         | Biso | 1     | C | 0.568  |        |
| C299 | 1 | 0.60191 |         | 0.8686  | 0.39809 |         | Biso | 1     | C | 0.019  |        |
| C300 | 1 | 0.6099  | 0.9108  | 0.3901  | Biso    | 1       | C    |       |   | -0.138 |        |
| H229 | 1 | 0.5938  | 0.9319  | 0.4062  | Biso    | 1       | H    | 0.125 |   |        |        |
| C301 | 1 | 0.6374  | 0.9242  | 0.3626  | Biso    | 1       | C    |       |   | -0.046 |        |
| H230 | 1 | 0.641   | 0.9548  | 0.359   | Biso    | 1       | H    | 0.101 |   |        |        |
| C302 | 1 | 0.6641  | 0.895   | 0.3359  | Biso    | 1       | C    |       |   | -0.265 |        |
| H231 | 1 | 0.6847  | 0.9055  | 0.3153  | Biso    | 1       | H    | 0.138 |   |        |        |
| C303 | 1 | 0.65711 |         | 0.8501  | 0.34289 |         | Biso | 1     | C | 0.266  |        |
| C304 | 1 | 0.62524 |         | 0.8352  | 0.37476 |         | Biso | 1     | C | -0.235 |        |
| H232 | 1 | 0.6201  | 0.8051  | 0.3799  | Biso    | 1       | H    | 0.162 |   |        |        |
| C305 | 1 | 0.71207 |         | 0.8314  | 0.28793 |         | Biso | 1     | C | -0.072 |        |
| C306 | 1 | 0.73111 |         | 0.78973 | 0.26889 |         | Biso | 1     | C | 0.011  |        |
| O100 | 1 | 0.5639  | 0.81089 |         | 0.4361  | Biso    | 1    | O     |   | -0.412 |        |

|      |   |         |         |         |      |   |   |        |
|------|---|---------|---------|---------|------|---|---|--------|
| O101 | 1 | 0.54748 | 0.88002 | 0.45252 | Biso | 1 | O | -0.481 |
| O102 | 1 | 0.67918 | 0.81775 | 0.32082 | Biso | 1 | O | -0.189 |
| C307 | 1 | 0.93207 | 0.3518  | 0.06793 | Biso | 1 | C | 0.569  |
| C308 | 1 | 0.89809 | 0.3686  | 0.10191 | Biso | 1 | C | 0.019  |
| C309 | 1 | 0.8901  | 0.4108  | 0.1099  | Biso | 1 | C | -0.138 |
| H233 | 1 | 0.9062  | 0.4319  | 0.0938  | Biso | 1 | H | 0.125  |
| C310 | 1 | 0.8626  | 0.4242  | 0.1374  | Biso | 1 | C | -0.045 |
| H234 | 1 | 0.859   | 0.4548  | 0.141   | Biso | 1 | H | 0.101  |
| C311 | 1 | 0.8359  | 0.395   | 0.1641  | Biso | 1 | C | -0.265 |
| H235 | 1 | 0.8153  | 0.4055  | 0.1847  | Biso | 1 | H | 0.138  |
| C312 | 1 | 0.84289 | 0.3501  | 0.15711 | Biso | 1 | C | 0.266  |
| C313 | 1 | 0.87476 | 0.3352  | 0.12524 | Biso | 1 | C | -0.235 |
| H236 | 1 | 0.8799  | 0.3051  | 0.1201  | Biso | 1 | H | 0.162  |
| C314 | 1 | 0.78793 | 0.3314  | 0.21207 | Biso | 1 | C | -0.074 |
| C315 | 1 | 0.76889 | 0.28973 | 0.23111 | Biso | 1 | C | 0.011  |
| O103 | 1 | 0.9361  | 0.31089 | 0.0639  | Biso | 1 | O | -0.413 |
| O104 | 1 | 0.95252 | 0.38002 | 0.04748 | Biso | 1 | O | -0.481 |
| O105 | 1 | 0.82082 | 0.31775 | 0.17918 | Biso | 1 | O | -0.189 |
| C316 | 1 | 0.43207 | 0.8518  | 0.56793 | Biso | 1 | C | 0.568  |
| C317 | 1 | 0.39809 | 0.8686  | 0.60191 | Biso | 1 | C | 0.019  |
| C318 | 1 | 0.3901  | 0.9108  | 0.6099  | Biso | 1 | C | -0.138 |
| H237 | 1 | 0.4062  | 0.9319  | 0.5938  | Biso | 1 | H | 0.125  |
| C319 | 1 | 0.3626  | 0.9242  | 0.6374  | Biso | 1 | C | -0.045 |
| H238 | 1 | 0.359   | 0.9548  | 0.641   | Biso | 1 | H | 0.101  |
| C320 | 1 | 0.3359  | 0.895   | 0.6641  | Biso | 1 | C | -0.265 |
| H239 | 1 | 0.3153  | 0.9055  | 0.6847  | Biso | 1 | H | 0.138  |
| C321 | 1 | 0.34289 | 0.8501  | 0.65711 | Biso | 1 | C | 0.266  |
| C322 | 1 | 0.37476 | 0.8352  | 0.62524 | Biso | 1 | C | -0.235 |
| H240 | 1 | 0.3799  | 0.8051  | 0.6201  | Biso | 1 | H | 0.162  |
| C323 | 1 | 0.28793 | 0.8314  | 0.71207 | Biso | 1 | C | -0.072 |
| C324 | 1 | 0.26889 | 0.78973 | 0.73111 | Biso | 1 | C | 0.011  |
| O106 | 1 | 0.4361  | 0.81089 | 0.5639  | Biso | 1 | O | -0.413 |
| O107 | 1 | 0.45252 | 0.88002 | 0.54748 | Biso | 1 | O | -0.481 |
| O108 | 1 | 0.32082 | 0.81775 | 0.67918 | Biso | 1 | O | -0.189 |
| C325 | 1 | 0.93207 | 0.6482  | 0.93207 | Biso | 1 | C | 0.569  |
| C326 | 1 | 0.89809 | 0.6314  | 0.89809 | Biso | 1 | C | 0.019  |
| C327 | 1 | 0.8901  | 0.5892  | 0.8901  | Biso | 1 | C | -0.137 |
| H241 | 1 | 0.9062  | 0.5681  | 0.9062  | Biso | 1 | H | 0.123  |
| C328 | 1 | 0.8626  | 0.5758  | 0.8626  | Biso | 1 | C | -0.044 |
| H242 | 1 | 0.859   | 0.5452  | 0.859   | Biso | 1 | H | 0.101  |
| C329 | 1 | 0.8359  | 0.605   | 0.8359  | Biso | 1 | C | -0.265 |
| H243 | 1 | 0.8153  | 0.5945  | 0.8153  | Biso | 1 | H | 0.138  |
| C330 | 1 | 0.84289 | 0.6499  | 0.84289 | Biso | 1 | C | 0.266  |
| C331 | 1 | 0.87476 | 0.6648  | 0.87476 | Biso | 1 | C | -0.235 |
| H244 | 1 | 0.8799  | 0.6949  | 0.8799  | Biso | 1 | H | 0.162  |
| C332 | 1 | 0.78793 | 0.6686  | 0.78793 | Biso | 1 | C | -0.075 |
| C333 | 1 | 0.76889 | 0.71027 | 0.76889 | Biso | 1 | C | 0.011  |
| O109 | 1 | 0.9361  | 0.68911 | 0.9361  | Biso | 1 | O | -0.413 |
| O110 | 1 | 0.95252 | 0.61998 | 0.95252 | Biso | 1 | O | -0.481 |
| O111 | 1 | 0.82082 | 0.68225 | 0.82082 | Biso | 1 | O | -0.190 |
| C334 | 1 | 0.43207 | 0.1482  | 0.43207 | Biso | 1 | C | 0.568  |
| C335 | 1 | 0.39809 | 0.1314  | 0.39809 | Biso | 1 | C | 0.019  |

|      |   |         |         |         |         |      |   |        |        |
|------|---|---------|---------|---------|---------|------|---|--------|--------|
| C336 | 1 | 0.3901  | 0.0892  | 0.3901  | Biso    | 1    | C | -0.137 |        |
| H245 | 1 | 0.4062  | 0.0681  | 0.4062  | Biso    | 1    | H | 0.123  |        |
| C337 | 1 | 0.3626  | 0.0758  | 0.3626  | Biso    | 1    | C | -0.044 |        |
| H246 | 1 | 0.359   | 0.0452  | 0.359   | Biso    | 1    | H | 0.101  |        |
| C338 | 1 | 0.3359  | 0.105   | 0.3359  | Biso    | 1    | C | -0.266 |        |
| H247 | 1 | 0.3153  | 0.0945  | 0.3153  | Biso    | 1    | H | 0.138  |        |
| C339 | 1 | 0.34289 |         | 0.1499  | 0.34289 | Biso | 1 | C      | 0.266  |
| C340 | 1 | 0.37476 |         | 0.1648  | 0.37476 | Biso | 1 | C      | -0.235 |
| H248 | 1 | 0.3799  | 0.1949  | 0.3799  | Biso    | 1    | H | 0.162  |        |
| C341 | 1 | 0.28793 |         | 0.1686  | 0.28793 | Biso | 1 | C      | -0.074 |
| C342 | 1 | 0.26889 |         | 0.21027 | 0.26889 | Biso | 1 | C      | 0.011  |
| O112 | 1 | 0.4361  | 0.18911 |         | 0.4361  | Biso | 1 | O      | -0.412 |
| O113 | 1 | 0.45252 |         | 0.11998 | 0.45252 | Biso | 1 | O      | -0.481 |
| O114 | 1 | 0.32082 |         | 0.18225 | 0.32082 | Biso | 1 | O      | -0.189 |
| C343 | 1 | 0.06793 |         | 0.6482  | 0.06793 | Biso | 1 | C      | 0.569  |
| C344 | 1 | 0.10191 |         | 0.6314  | 0.10191 | Biso | 1 | C      | 0.019  |
| C345 | 1 | 0.1099  | 0.5892  | 0.1099  | Biso    | 1    | C | -0.138 |        |
| H249 | 1 | 0.0938  | 0.5681  | 0.0938  | Biso    | 1    | H | 0.125  |        |
| C346 | 1 | 0.1374  | 0.5758  | 0.1374  | Biso    | 1    | C | -0.045 |        |
| H250 | 1 | 0.141   | 0.5452  | 0.141   | Biso    | 1    | H | 0.101  |        |
| C347 | 1 | 0.1641  | 0.605   | 0.1641  | Biso    | 1    | C | -0.265 |        |
| H251 | 1 | 0.1847  | 0.5945  | 0.1847  | Biso    | 1    | H | 0.138  |        |
| C348 | 1 | 0.15711 |         | 0.6499  | 0.15711 | Biso | 1 | C      | 0.266  |
| C349 | 1 | 0.12524 |         | 0.6648  | 0.12524 | Biso | 1 | C      | -0.235 |
| H252 | 1 | 0.1201  | 0.6949  | 0.1201  | Biso    | 1    | H | 0.162  |        |
| C350 | 1 | 0.21207 |         | 0.6686  | 0.21207 | Biso | 1 | C      | -0.074 |
| C351 | 1 | 0.23111 |         | 0.71027 | 0.23111 | Biso | 1 | C      | 0.011  |
| O115 | 1 | 0.0639  | 0.68911 |         | 0.0639  | Biso | 1 | O      | -0.413 |
| O116 | 1 | 0.04748 |         | 0.61998 | 0.04748 | Biso | 1 | O      | -0.481 |
| O117 | 1 | 0.17918 |         | 0.68225 | 0.17918 | Biso | 1 | O      | -0.190 |
| C352 | 1 | 0.56793 |         | 0.1482  | 0.56793 | Biso | 1 | C      | 0.569  |
| C353 | 1 | 0.60191 |         | 0.1314  | 0.60191 | Biso | 1 | C      | 0.019  |
| C354 | 1 | 0.6099  | 0.0892  | 0.6099  | Biso    | 1    | C | -0.138 |        |
| H253 | 1 | 0.5938  | 0.0681  | 0.5938  | Biso    | 1    | H | 0.125  |        |
| C355 | 1 | 0.6374  | 0.0758  | 0.6374  | Biso    | 1    | C | -0.045 |        |
| H254 | 1 | 0.641   | 0.0452  | 0.641   | Biso    | 1    | H | 0.101  |        |
| C356 | 1 | 0.6641  | 0.105   | 0.6641  | Biso    | 1    | C | -0.265 |        |
| H255 | 1 | 0.6847  | 0.0945  | 0.6847  | Biso    | 1    | H | 0.138  |        |
| C357 | 1 | 0.65711 |         | 0.1499  | 0.65711 | Biso | 1 | C      | 0.266  |
| C358 | 1 | 0.62524 |         | 0.1648  | 0.62524 | Biso | 1 | C      | -0.235 |
| H256 | 1 | 0.6201  | 0.1949  | 0.6201  | Biso    | 1    | H | 0.162  |        |
| C359 | 1 | 0.71207 |         | 0.1686  | 0.71207 | Biso | 1 | C      | -0.074 |
| C360 | 1 | 0.73111 |         | 0.21027 | 0.73111 | Biso | 1 | C      | 0.011  |
| O118 | 1 | 0.5639  | 0.18911 |         | 0.5639  | Biso | 1 | O      | -0.412 |
| O119 | 1 | 0.54748 |         | 0.11998 | 0.54748 | Biso | 1 | O      | -0.480 |
| O120 | 1 | 0.67918 |         | 0.18225 | 0.67918 | Biso | 1 | O      | -0.190 |
| C361 | 1 | 0.3518  | 0.06793 |         | 0.93207 | Biso | 1 | C      | 0.569  |
| C362 | 1 | 0.3686  | 0.10191 |         | 0.89809 | Biso | 1 | C      | 0.019  |
| C363 | 1 | 0.4108  | 0.1099  | 0.8901  | Biso    | 1    | C | -0.139 |        |
| H257 | 1 | 0.4319  | 0.0938  | 0.9062  | Biso    | 1    | H | 0.125  |        |
| C364 | 1 | 0.4242  | 0.1374  | 0.8626  | Biso    | 1    | C | -0.044 |        |
| H258 | 1 | 0.4548  | 0.141   | 0.859   | Biso    | 1    | H | 0.101  |        |

|      |   |         |         |         |      |   |   |        |  |
|------|---|---------|---------|---------|------|---|---|--------|--|
| C365 | 1 | 0.395   | 0.1641  | 0.8359  | Biso | 1 | C | -0.265 |  |
| H259 | 1 | 0.4055  | 0.1847  | 0.8153  | Biso | 1 | H | 0.138  |  |
| C366 | 1 | 0.3501  | 0.15711 | 0.84289 | Biso | 1 | C | 0.266  |  |
| C367 | 1 | 0.3352  | 0.12524 | 0.87476 | Biso | 1 | C | -0.234 |  |
| H260 | 1 | 0.3051  | 0.1201  | 0.8799  | Biso | 1 | H | 0.162  |  |
| C368 | 1 | 0.3314  | 0.21207 | 0.78793 | Biso | 1 | C | -0.074 |  |
| C369 | 1 | 0.28973 | 0.23111 | 0.76889 | Biso | 1 | C | 0.011  |  |
| O121 | 1 | 0.31089 | 0.0639  | 0.9361  | Biso | 1 | O | -0.413 |  |
| O122 | 1 | 0.38002 | 0.04748 | 0.95252 | Biso | 1 | O | -0.481 |  |
| O123 | 1 | 0.31775 | 0.17918 | 0.82082 | Biso | 1 | O | -0.189 |  |
| C370 | 1 | 0.8518  | 0.56793 | 0.43207 | Biso | 1 | C | 0.568  |  |
| C371 | 1 | 0.8686  | 0.60191 | 0.39809 | Biso | 1 | C | 0.019  |  |
| C372 | 1 | 0.9108  | 0.6099  | 0.3901  | Biso | 1 | C | -0.138 |  |
| H261 | 1 | 0.9319  | 0.5938  | 0.4062  | Biso | 1 | H | 0.125  |  |
| C373 | 1 | 0.9242  | 0.6374  | 0.3626  | Biso | 1 | C | -0.045 |  |
| H262 | 1 | 0.9548  | 0.641   | 0.359   | Biso | 1 | H | 0.101  |  |
| C374 | 1 | 0.895   | 0.6641  | 0.3359  | Biso | 1 | C | -0.265 |  |
| H263 | 1 | 0.9055  | 0.6847  | 0.3153  | Biso | 1 | H | 0.138  |  |
| C375 | 1 | 0.8501  | 0.65711 | 0.34289 | Biso | 1 | C | 0.266  |  |
| C376 | 1 | 0.8352  | 0.62524 | 0.37476 | Biso | 1 | C | -0.234 |  |
| H264 | 1 | 0.8051  | 0.6201  | 0.3799  | Biso | 1 | H | 0.162  |  |
| C377 | 1 | 0.8314  | 0.71207 | 0.28793 | Biso | 1 | C | -0.072 |  |
| C378 | 1 | 0.78973 | 0.73111 | 0.26889 | Biso | 1 | C | 0.011  |  |
| O124 | 1 | 0.81089 | 0.5639  | 0.4361  | Biso | 1 | O | -0.413 |  |
| O125 | 1 | 0.88002 | 0.54748 | 0.45252 | Biso | 1 | O | -0.480 |  |
| O126 | 1 | 0.81775 | 0.67918 | 0.32082 | Biso | 1 | O | -0.189 |  |
| C379 | 1 | 0.3518  | 0.93207 | 0.06793 | Biso | 1 | C | 0.569  |  |
| C380 | 1 | 0.3686  | 0.89809 | 0.10191 | Biso | 1 | C | 0.019  |  |
| C381 | 1 | 0.4108  | 0.8901  | 0.1099  | Biso | 1 | C | -0.138 |  |
| H265 | 1 | 0.4319  | 0.9062  | 0.0938  | Biso | 1 | H | 0.125  |  |
| C382 | 1 | 0.4242  | 0.8626  | 0.1374  | Biso | 1 | C | -0.045 |  |
| H266 | 1 | 0.4548  | 0.859   | 0.141   | Biso | 1 | H | 0.101  |  |
| C383 | 1 | 0.395   | 0.8359  | 0.1641  | Biso | 1 | C | -0.265 |  |
| H267 | 1 | 0.4055  | 0.8153  | 0.1847  | Biso | 1 | H | 0.138  |  |
| C384 | 1 | 0.3501  | 0.84289 | 0.15711 | Biso | 1 | C | 0.266  |  |
| C385 | 1 | 0.3352  | 0.87476 | 0.12524 | Biso | 1 | C | -0.235 |  |
| H268 | 1 | 0.3051  | 0.8799  | 0.1201  | Biso | 1 | H | 0.162  |  |
| C386 | 1 | 0.3314  | 0.78793 | 0.21207 | Biso | 1 | C | -0.074 |  |
| C387 | 1 | 0.28973 | 0.76889 | 0.23111 | Biso | 1 | C | 0.011  |  |
| O127 | 1 | 0.31089 | 0.9361  | 0.0639  | Biso | 1 | O | -0.412 |  |
| O128 | 1 | 0.38002 | 0.95252 | 0.04748 | Biso | 1 | O | -0.480 |  |
| O129 | 1 | 0.31775 | 0.82082 | 0.17918 | Biso | 1 | O | -0.189 |  |
| C388 | 1 | 0.8518  | 0.43207 | 0.56793 | Biso | 1 | C | 0.568  |  |
| C389 | 1 | 0.8686  | 0.39809 | 0.60191 | Biso | 1 | C | 0.019  |  |
| C390 | 1 | 0.9108  | 0.3901  | 0.6099  | Biso | 1 | C | -0.138 |  |
| H269 | 1 | 0.9319  | 0.4062  | 0.5938  | Biso | 1 | H | 0.125  |  |
| C391 | 1 | 0.9242  | 0.3626  | 0.6374  | Biso | 1 | C | -0.045 |  |
| H270 | 1 | 0.9548  | 0.359   | 0.641   | Biso | 1 | H | 0.101  |  |
| C392 | 1 | 0.895   | 0.3359  | 0.6641  | Biso | 1 | C | -0.265 |  |
| H271 | 1 | 0.9055  | 0.3153  | 0.6847  | Biso | 1 | H | 0.138  |  |
| C393 | 1 | 0.8501  | 0.34289 | 0.65711 | Biso | 1 | C | 0.266  |  |
| C394 | 1 | 0.8352  | 0.37476 | 0.62524 | Biso | 1 | C | -0.234 |  |

|      |   |         |         |         |      |   |   |        |  |
|------|---|---------|---------|---------|------|---|---|--------|--|
| H272 | 1 | 0.8051  | 0.3799  | 0.6201  | Biso | 1 | H | 0.162  |  |
| C395 | 1 | 0.8314  | 0.28793 | 0.71207 | Biso | 1 | C | -0.072 |  |
| C396 | 1 | 0.78973 | 0.26889 | 0.73111 | Biso | 1 | C | 0.011  |  |
| O130 | 1 | 0.81089 | 0.4361  | 0.5639  | Biso | 1 | O | -0.413 |  |
| O131 | 1 | 0.88002 | 0.45252 | 0.54748 | Biso | 1 | O | -0.481 |  |
| O132 | 1 | 0.81775 | 0.32082 | 0.67918 | Biso | 1 | O | -0.188 |  |
| C397 | 1 | 0.6482  | 0.06793 | 0.06793 | Biso | 1 | C | 0.569  |  |
| C398 | 1 | 0.6314  | 0.10191 | 0.10191 | Biso | 1 | C | 0.019  |  |
| C399 | 1 | 0.5892  | 0.1099  | 0.1099  | Biso | 1 | C | -0.138 |  |
| H273 | 1 | 0.5681  | 0.0938  | 0.0938  | Biso | 1 | H | 0.125  |  |
| C400 | 1 | 0.5758  | 0.1374  | 0.1374  | Biso | 1 | C | -0.045 |  |
| H274 | 1 | 0.5452  | 0.141   | 0.141   | Biso | 1 | H | 0.101  |  |
| C401 | 1 | 0.605   | 0.1641  | 0.1641  | Biso | 1 | C | -0.265 |  |
| H275 | 1 | 0.5945  | 0.1847  | 0.1847  | Biso | 1 | H | 0.138  |  |
| C402 | 1 | 0.6499  | 0.15711 | 0.15711 | Biso | 1 | C | 0.266  |  |
| C403 | 1 | 0.6648  | 0.12524 | 0.12524 | Biso | 1 | C | -0.235 |  |
| H276 | 1 | 0.6949  | 0.1201  | 0.1201  | Biso | 1 | H | 0.162  |  |
| C404 | 1 | 0.6686  | 0.21207 | 0.21207 | Biso | 1 | C | -0.074 |  |
| C405 | 1 | 0.71027 | 0.23111 | 0.23111 | Biso | 1 | C | 0.011  |  |
| O133 | 1 | 0.68911 | 0.0639  | 0.0639  | Biso | 1 | O | -0.413 |  |
| O134 | 1 | 0.61998 | 0.04748 | 0.04748 | Biso | 1 | O | -0.481 |  |
| O135 | 1 | 0.68225 | 0.17918 | 0.17918 | Biso | 1 | O | -0.189 |  |
| C406 | 1 | 0.1482  | 0.56793 | 0.56793 | Biso | 1 | C | 0.569  |  |
| C407 | 1 | 0.1314  | 0.60191 | 0.60191 | Biso | 1 | C | 0.019  |  |
| C408 | 1 | 0.0892  | 0.6099  | 0.6099  | Biso | 1 | C | -0.138 |  |
| H277 | 1 | 0.0681  | 0.5938  | 0.5938  | Biso | 1 | H | 0.125  |  |
| C409 | 1 | 0.0758  | 0.6374  | 0.6374  | Biso | 1 | C | -0.045 |  |
| H278 | 1 | 0.0452  | 0.641   | 0.641   | Biso | 1 | H | 0.101  |  |
| C410 | 1 | 0.105   | 0.6641  | 0.6641  | Biso | 1 | C | -0.265 |  |
| H279 | 1 | 0.0945  | 0.6847  | 0.6847  | Biso | 1 | H | 0.138  |  |
| C411 | 1 | 0.1499  | 0.65711 | 0.65711 | Biso | 1 | C | 0.266  |  |
| C412 | 1 | 0.1648  | 0.62524 | 0.62524 | Biso | 1 | C | -0.235 |  |
| H280 | 1 | 0.1949  | 0.6201  | 0.6201  | Biso | 1 | H | 0.162  |  |
| C413 | 1 | 0.1686  | 0.71207 | 0.71207 | Biso | 1 | C | -0.074 |  |
| C414 | 1 | 0.21027 | 0.73111 | 0.73111 | Biso | 1 | C | 0.011  |  |
| O136 | 1 | 0.18911 | 0.5639  | 0.5639  | Biso | 1 | O | -0.413 |  |
| O137 | 1 | 0.11998 | 0.54748 | 0.54748 | Biso | 1 | O | -0.481 |  |
| O138 | 1 | 0.18225 | 0.67918 | 0.67918 | Biso | 1 | O | -0.190 |  |
| C415 | 1 | 0.6482  | 0.93207 | 0.93207 | Biso | 1 | C | 0.569  |  |
| C416 | 1 | 0.6314  | 0.89809 | 0.89809 | Biso | 1 | C | 0.019  |  |
| C417 | 1 | 0.5892  | 0.8901  | 0.8901  | Biso | 1 | C | -0.139 |  |
| H281 | 1 | 0.5681  | 0.9062  | 0.9062  | Biso | 1 | H | 0.125  |  |
| C418 | 1 | 0.5758  | 0.8626  | 0.8626  | Biso | 1 | C | -0.044 |  |
| H282 | 1 | 0.5452  | 0.859   | 0.859   | Biso | 1 | H | 0.101  |  |
| C419 | 1 | 0.605   | 0.8359  | 0.8359  | Biso | 1 | C | -0.265 |  |
| H283 | 1 | 0.5945  | 0.8153  | 0.8153  | Biso | 1 | H | 0.138  |  |
| C420 | 1 | 0.6499  | 0.84289 | 0.84289 | Biso | 1 | C | 0.266  |  |
| C421 | 1 | 0.6648  | 0.87476 | 0.87476 | Biso | 1 | C | -0.235 |  |
| H284 | 1 | 0.6949  | 0.8799  | 0.8799  | Biso | 1 | H | 0.162  |  |
| C422 | 1 | 0.6686  | 0.78793 | 0.78793 | Biso | 1 | C | -0.075 |  |
| C423 | 1 | 0.71027 | 0.76889 | 0.76889 | Biso | 1 | C | 0.011  |  |
| O139 | 1 | 0.68911 | 0.9361  | 0.9361  | Biso | 1 | O | -0.412 |  |

|      |   |         |         |         |      |   |   |        |
|------|---|---------|---------|---------|------|---|---|--------|
| O140 | 1 | 0.61998 | 0.95252 | 0.95252 | Biso | 1 | O | -0.480 |
| O141 | 1 | 0.68225 | 0.82082 | 0.82082 | Biso | 1 | O | -0.189 |
| C424 | 1 | 0.1482  | 0.43207 | 0.43207 | Biso | 1 | C | 0.569  |
| C425 | 1 | 0.1314  | 0.39809 | 0.39809 | Biso | 1 | C | 0.019  |
| C426 | 1 | 0.0892  | 0.3901  | 0.3901  | Biso | 1 | C | -0.136 |
| H285 | 1 | 0.0681  | 0.4062  | 0.4062  | Biso | 1 | H | 0.123  |
| C427 | 1 | 0.0758  | 0.3626  | 0.3626  | Biso | 1 | C | -0.044 |
| H286 | 1 | 0.0452  | 0.359   | 0.359   | Biso | 1 | H | 0.101  |
| C428 | 1 | 0.105   | 0.3359  | 0.3359  | Biso | 1 | C | -0.265 |
| H287 | 1 | 0.0945  | 0.3153  | 0.3153  | Biso | 1 | H | 0.138  |
| C429 | 1 | 0.1499  | 0.34289 | 0.34289 | Biso | 1 | C | 0.266  |
| C430 | 1 | 0.1648  | 0.37476 | 0.37476 | Biso | 1 | C | -0.235 |
| H288 | 1 | 0.1949  | 0.3799  | 0.3799  | Biso | 1 | H | 0.162  |
| C431 | 1 | 0.1686  | 0.28793 | 0.28793 | Biso | 1 | C | -0.074 |
| C432 | 1 | 0.21027 | 0.26889 | 0.26889 | Biso | 1 | C | 0.011  |
| O142 | 1 | 0.18911 | 0.4361  | 0.4361  | Biso | 1 | O | -0.412 |
| O143 | 1 | 0.11998 | 0.45252 | 0.45252 | Biso | 1 | O | -0.481 |
| O144 | 1 | 0.18225 | 0.32082 | 0.32082 | Biso | 1 | O | -0.189 |

```

data_AFUKET_clean
_audit_creation_date      2014-07-02
_audit_creation_method    'Materials Studio'
_symmetry_space_group_name_H-M  'P1'
_symmetry_Int_Tables_number  1
_symmetry_cell_setting    triclinic
loop_
_symmetry_equiv_pos_as_xyz
  x,y,z
_cell_length_a            10.5211
_cell_length_b            24.1489
_cell_length_c            37.8771
_cell_angle_alpha        88.2663
_cell_angle_beta         82.0167
_cell_angle_gamma        77.4181
loop_
_atom_site_label
_atom_site_type_symbol
_atom_site_fract_x
_atom_site_fract_y
_atom_site_fract_z
_atom_site_U_iso_or_equiv
_atom_site_adp_type
_atom_site_occupancy
_atom_site_charge
Mn1  Mn   0.39068   0.73654   0.58676   0.01267   Uiso  1  0.7436599999
Mn2  Mn   0.05843   0.73202   0.61748   0.01267   Uiso  1   0.877435
Mn3  Mn   0.79919   0.66961   0.63657   0.01267   Uiso  1   0.771084
Mn4  Mn   0.71398   0.26346   0.41324   0.01267   Uiso  1   0.747678
Mn5  Mn   0.40793   0.26798   0.38252   0.01267   Uiso  1   0.880779
Mn6  Mn   0.10537   0.33039   0.36343   0.01267   Uiso  1   0.762706
Mn7  Mn   0.22744   0.23654   0.91324   0.01267   Uiso  1   0.748908
Mn8  Mn   0.92591   0.23202   0.88252   0.01267   Uiso  1   0.879025
Mn9  Mn   0.68576   0.16961   0.86343   0.01267   Uiso  1   0.761481
Mn10 Mn   0.37722   0.76346   0.08676   0.01267   Uiso  1   0.745642
Mn11 Mn   0.04045   0.76798   0.11748   0.01267   Uiso  1   0.878823
Mn12 Mn   0.7188 0.83039   0.13657   0.01267   Uiso  1   0.769227
H1   H    0.0787 0.8488 0.8296 0.01267   Uiso  1   0.093806
H2   H    0.1098 0.7818 0.8298 0.01267   Uiso  1   0.097496
H3   H    0.3233 0.8694 0.8522 0.01267   Uiso  1   0.100192
H4   H    0.2885 0.8674 0.894 0.01267   Uiso  1   0.090842
H5   H    0.052 0.779 0.8968 0.01267   Uiso  1   0.095304
H6   H    0.0083 0.8454 0.894 0.01267   Uiso  1   0.088697
H7   H    0.3293 0.7644 0.8946 0.01267   Uiso  1   0.078239
H8   H    0.3733 0.7646 0.8534 0.01267   Uiso  1   0.083159
H9   H    0.1242 0.6572 0.8406 0.01267   Uiso  1   0.079197
H10  H    0.1521 0.5912 0.835 0.01267   Uiso  1   0.085479
H11  H    0.4611 0.5582 0.8696 0.01267   Uiso  1   0.090484
H12  H    0.4505 0.5686 0.8288 0.01267   Uiso  1   0.096208
H13  H    0.1721 0.5766 0.8964 0.01267   Uiso  1   0.107349
H14  H    0.1517 0.6416 0.904 0.01267   Uiso  1   0.095504

```

|     |   |        |        |        |         |      |   |          |
|-----|---|--------|--------|--------|---------|------|---|----------|
| H15 | H | 0.405  | 0.6684 | 0.837  | 0.01267 | Uiso | 1 | 0.098077 |
| H16 | H | 0.4164 | 0.66   | 0.8778 | 0.01267 | Uiso | 1 | 0.093882 |
| H17 | H | 0.0619 | 0.8126 | 0.7724 | 0.01267 | Uiso | 1 | 0.121171 |
| H18 | H | 0.0707 | 0.7914 | 0.7126 | 0.01267 | Uiso | 1 | 0.124436 |
| H19 | H | 0.4591 | 0.7738 | 0.6994 | 0.01267 | Uiso | 1 | 0.128439 |
| H20 | H | 0.4475 | 0.7914 | 0.7594 | 0.01267 | Uiso | 1 | 0.127262 |
| H21 | H | 0.9786 | 0.0046 | 0.8774 | 0.01267 | Uiso | 1 | 0.112875 |
| H22 | H | 0.9904 | 0.0934 | 0.891  | 0.01267 | Uiso | 1 | 0.123518 |
| H23 | H | 0.3789 | 0.0404 | 0.8864 | 0.01267 | Uiso | 1 | 0.104528 |
| H24 | H | 0.3575 | 0.9496 | 0.8748 | 0.01267 | Uiso | 1 | 0.115907 |
| H25 | H | 0.1827 | 0.8374 | 0.9892 | 0.01267 | Uiso | 1 | 0.12766  |
| H26 | H | 0.0574 | 0.837  | 0.045  | 0.01267 | Uiso | 1 | 0.115853 |
| H27 | H | 0.7627 | 0.8086 | 0.9998 | 0.01267 | Uiso | 1 | 0.104305 |
| H28 | H | 0.8838 | 0.8068 | 0.9436 | 0.01267 | Uiso | 1 | 0.117972 |
| H29 | H | 0.0026 | 0.6384 | 0.8016 | 0.01267 | Uiso | 1 | 0.116333 |
| H30 | H | 0.8864 | 0.6444 | 0.755  | 0.01267 | Uiso | 1 | 0.116082 |
| H31 | H | 0.212  | 0.6524 | 0.6898 | 0.01267 | Uiso | 1 | 0.118098 |
| H32 | H | 0.3267 | 0.6378 | 0.7374 | 0.01267 | Uiso | 1 | 0.136401 |
| H33 | H | 0.285  | 0.423  | 0.8522 | 0.01267 | Uiso | 1 | 0.138135 |
| H34 | H | 0.4086 | 0.3344 | 0.8546 | 0.01267 | Uiso | 1 | 0.11306  |
| H35 | H | 0.7302 | 0.3938 | 0.8502 | 0.01267 | Uiso | 1 | 0.121407 |
| H36 | H | 0.603  | 0.488  | 0.8466 | 0.01267 | Uiso | 1 | 0.127957 |
| H37 | H | 0.4468 | 0.5796 | 0.9684 | 0.01267 | Uiso | 1 | 0.138743 |
| H38 | H | 0.4081 | 0.6168 | 0.0264 | 0.01267 | Uiso | 1 | 0.115701 |
| H39 | H | 0.0553 | 0.6982 | 0.0102 | 0.01267 | Uiso | 1 | 0.114467 |
| H40 | H | 0.0912 | 0.661  | 0.9526 | 0.01267 | Uiso | 1 | 0.135728 |
| H41 | H | 0.8059 | 0.5646 | 0.579  | 0.01267 | Uiso | 1 | 0.106073 |
| H42 | H | 0.8502 | 0.5442 | 0.6792 | 0.01267 | Uiso | 1 | 0.125825 |
| H43 | H | 0.8469 | 0.4532 | 0.658  | 0.01267 | Uiso | 1 | 0.141414 |
| H44 | H | 0.8366 | 0.3892 | 0.6188 | 0.01267 | Uiso | 1 | 0.12819  |
| H45 | H | 0.7952 | 0.3204 | 0.581  | 0.01267 | Uiso | 1 | 0.126467 |
| H46 | H | 0.6822 | 0.4404 | 0.512  | 0.01267 | Uiso | 1 | 0.134335 |
| H47 | H | 0.7209 | 0.5072 | 0.552  | 0.01267 | Uiso | 1 | 0.124126 |
| H48 | H | 0.7323 | 0.3662 | 0.4706 | 0.01267 | Uiso | 1 | 0.094956 |
| H49 | H | 0.7064 | 0.265  | 0.5518 | 0.01267 | Uiso | 1 | 0.126698 |
| H50 | H | 0.7013 | 0.2146 | 0.4968 | 0.01267 | Uiso | 1 | 0.11434  |
| H51 | H | 0.7571 | 0.1512 | 0.1704 | 0.01267 | Uiso | 1 | 0.093352 |
| H52 | H | 0.7214 | 0.2182 | 0.1702 | 0.01267 | Uiso | 1 | 0.097267 |
| H53 | H | 0.0449 | 0.1306 | 0.1478 | 0.01267 | Uiso | 1 | 0.099939 |
| H54 | H | 0.0499 | 0.1326 | 0.106  | 0.01267 | Uiso | 1 | 0.092057 |
| H55 | H | 0.7278 | 0.221  | 0.1032 | 0.01267 | Uiso | 1 | 0.095864 |
| H56 | H | 0.7477 | 0.1546 | 0.106  | 0.01267 | Uiso | 1 | 0.089135 |
| H57 | H | 0.9883 | 0.2356 | 0.1054 | 0.01267 | Uiso | 1 | 0.078276 |
| H58 | H | 0.9913 | 0.2354 | 0.1466 | 0.01267 | Uiso | 1 | 0.090473 |
| H59 | H | 0.622  | 0.3428 | 0.1594 | 0.01267 | Uiso | 1 | 0.07799  |
| H60 | H | 0.5783 | 0.4088 | 0.165  | 0.01267 | Uiso | 1 | 0.085839 |
| H61 | H | 0.8889 | 0.4418 | 0.1304 | 0.01267 | Uiso | 1 | 0.090325 |
| H62 | H | 0.8479 | 0.4314 | 0.1712 | 0.01267 | Uiso | 1 | 0.101827 |
| H63 | H | 0.6451 | 0.4234 | 0.1036 | 0.01267 | Uiso | 1 | 0.108507 |
| H64 | H | 0.6973 | 0.3584 | 0.096  | 0.01267 | Uiso | 1 | 0.085993 |
| H65 | H | 0.9104 | 0.3316 | 0.163  | 0.01267 | Uiso | 1 | 0.097379 |
| H66 | H | 0.9542 | 0.34   | 0.1222 | 0.01267 | Uiso | 1 | 0.093006 |

|      |   |        |        |        |         |      |   |          |
|------|---|--------|--------|--------|---------|------|---|----------|
| H67  | H | 0.6469 | 0.1874 | 0.2276 | 0.01267 | Uiso | 1 | 0.119639 |
| H68  | H | 0.5747 | 0.2086 | 0.2874 | 0.01267 | Uiso | 1 | 0.124337 |
| H69  | H | 0.9323 | 0.2262 | 0.3006 | 0.01267 | Uiso | 1 | 0.126775 |
| H70  | H | 0.9983 | 0.2086 | 0.2406 | 0.01267 | Uiso | 1 | 0.126842 |
| H71  | H | 0.8606 | 0.9954 | 0.1226 | 0.01267 | Uiso | 1 | 0.110929 |
| H72  | H | 0.9748 | 0.9066 | 0.109  | 0.01267 | Uiso | 1 | 0.122805 |
| H73  | H | 0.3057 | 0.9596 | 0.1136 | 0.01267 | Uiso | 1 | 0.104965 |
| H74  | H | 0.1819 | 0.0504 | 0.1252 | 0.01267 | Uiso | 1 | 0.115914 |
| H75  | H | 0.0093 | 0.1626 | 0.0108 | 0.01267 | Uiso | 1 | 0.126784 |
| H76  | H | 0.9394 | 0.163  | 0.955  | 0.01267 | Uiso | 1 | 0.117297 |
| H77  | H | 0.5711 | 0.1914 | 0.0002 | 0.01267 | Uiso | 1 | 0.10399  |
| H78  | H | 0.6342 | 0.1932 | 0.0564 | 0.01267 | Uiso | 1 | 0.117745 |
| H79  | H | 0.4426 | 0.3616 | 0.1984 | 0.01267 | Uiso | 1 | 0.116052 |
| H80  | H | 0.2858 | 0.3556 | 0.245  | 0.01267 | Uiso | 1 | 0.118189 |
| H81  | H | 0.5542 | 0.3476 | 0.3102 | 0.01267 | Uiso | 1 | 0.118608 |
| H82  | H | 0.7019 | 0.3622 | 0.2626 | 0.01267 | Uiso | 1 | 0.136826 |
| H83  | H | 0.5602 | 0.577  | 0.1478 | 0.01267 | Uiso | 1 | 0.139037 |
| H84  | H | 0.5976 | 0.6656 | 0.1454 | 0.01267 | Uiso | 1 | 0.1139   |
| H85  | H | 0.9742 | 0.6062 | 0.1498 | 0.01267 | Uiso | 1 | 0.121541 |
| H86  | H | 0.9376 | 0.512  | 0.1534 | 0.01267 | Uiso | 1 | 0.129709 |
| H87  | H | 0.9948 | 0.4204 | 0.0316 | 0.01267 | Uiso | 1 | 0.138889 |
| H88  | H | 0.0513 | 0.3832 | 0.9736 | 0.01267 | Uiso | 1 | 0.116895 |
| H89  | H | 0.7637 | 0.3018 | 0.9898 | 0.01267 | Uiso | 1 | 0.11364  |
| H90  | H | 0.7048 | 0.339  | 0.0474 | 0.01267 | Uiso | 1 | 0.125321 |
| H91  | H | 0.9495 | 0.4354 | 0.421  | 0.01267 | Uiso | 1 | 0.106318 |
| H92  | H | 0.0736 | 0.4558 | 0.3208 | 0.01267 | Uiso | 1 | 0.126443 |
| H93  | H | 0.9581 | 0.5468 | 0.342  | 0.01267 | Uiso | 1 | 0.140788 |
| H94  | H | 0.8446 | 0.6108 | 0.3812 | 0.01267 | Uiso | 1 | 0.129089 |
| H95  | H | 0.6966 | 0.6796 | 0.419  | 0.01267 | Uiso | 1 | 0.127151 |
| H96  | H | 0.6346 | 0.5596 | 0.488  | 0.01267 | Uiso | 1 | 0.135101 |
| H97  | H | 0.7801 | 0.4928 | 0.448  | 0.01267 | Uiso | 1 | 0.123789 |
| H98  | H | 0.5691 | 0.6338 | 0.5294 | 0.01267 | Uiso | 1 | 0.095561 |
| H99  | H | 0.5232 | 0.735  | 0.4482 | 0.01267 | Uiso | 1 | 0.126747 |
| H100 | H | 0.4127 | 0.7854 | 0.5032 | 0.01267 | Uiso | 1 | 0.115075 |
| H101 | H | 0.1583 | 0.3488 | 0.6704 | 0.01267 | Uiso | 1 | 0.100561 |
| H102 | H | 0.1896 | 0.2818 | 0.6702 | 0.01267 | Uiso | 1 | 0.096213 |
| H103 | H | 0.4255 | 0.3694 | 0.6478 | 0.01267 | Uiso | 1 | 0.100362 |
| H104 | H | 0.4325 | 0.3674 | 0.606  | 0.01267 | Uiso | 1 | 0.091724 |
| H105 | H | 0.1988 | 0.279  | 0.6032 | 0.01267 | Uiso | 1 | 0.095843 |
| H106 | H | 0.1523 | 0.3454 | 0.606  | 0.01267 | Uiso | 1 | 0.088591 |
| H107 | H | 0.4739 | 0.2644 | 0.6054 | 0.01267 | Uiso | 1 | 0.078395 |
| H108 | H | 0.4767 | 0.2646 | 0.6466 | 0.01267 | Uiso | 1 | 0.083686 |
| H109 | H | 0.2148 | 0.1572 | 0.6594 | 0.01267 | Uiso | 1 | 0.078412 |
| H110 | H | 0.2371 | 0.0912 | 0.665  | 0.01267 | Uiso | 1 | 0.08583  |
| H111 | H | 0.5807 | 0.0582 | 0.6304 | 0.01267 | Uiso | 1 | 0.091741 |
| H112 | H | 0.5293 | 0.0686 | 0.6712 | 0.01267 | Uiso | 1 | 0.091888 |
| H113 | H | 0.3185 | 0.0766 | 0.6036 | 0.01267 | Uiso | 1 | 0.107587 |
| H114 | H | 0.3057 | 0.1416 | 0.596  | 0.01267 | Uiso | 1 | 0.096478 |
| H115 | H | 0.492  | 0.1684 | 0.663  | 0.01267 | Uiso | 1 | 0.098792 |
| H116 | H | 0.5442 | 0.16   | 0.6222 | 0.01267 | Uiso | 1 | 0.094288 |
| H117 | H | 0.0843 | 0.3126 | 0.7276 | 0.01267 | Uiso | 1 | 0.120599 |
| H118 | H | 0.0333 | 0.2914 | 0.7874 | 0.01267 | Uiso | 1 | 0.124534 |

|      |   |        |        |        |         |      |   |          |
|------|---|--------|--------|--------|---------|------|---|----------|
| H119 | H | 0.4085 | 0.2738 | 0.8006 | 0.01267 | Uiso | 1 | 0.138822 |
| H120 | H | 0.4569 | 0.2914 | 0.7406 | 0.01267 | Uiso | 1 | 0.125758 |
| H121 | H | 0.106  | 0.5046 | 0.6226 | 0.01267 | Uiso | 1 | 0.110937 |
| H122 | H | 0.1314 | 0.5934 | 0.609  | 0.01267 | Uiso | 1 | 0.123385 |
| H123 | H | 0.5153 | 0.5404 | 0.6136 | 0.01267 | Uiso | 1 | 0.106209 |
| H124 | H | 0.4823 | 0.4496 | 0.6252 | 0.01267 | Uiso | 1 | 0.119816 |
| H125 | H | 0.4219 | 0.3374 | 0.5108 | 0.01267 | Uiso | 1 | 0.126288 |
| H126 | H | 0.3524 | 0.337  | 0.455  | 0.01267 | Uiso | 1 | 0.117327 |
| H127 | H | 0.0125 | 0.3086 | 0.5002 | 0.01267 | Uiso | 1 | 0.103446 |
| H128 | H | 0.0774 | 0.3068 | 0.5564 | 0.01267 | Uiso | 1 | 0.11835  |
| H129 | H | 0.0542 | 0.1384 | 0.6984 | 0.01267 | Uiso | 1 | 0.115139 |
| H130 | H | 0.8914 | 0.1444 | 0.745  | 0.01267 | Uiso | 1 | 0.116598 |
| H131 | H | 0.1518 | 0.1524 | 0.8102 | 0.01267 | Uiso | 1 | 0.117724 |
| H132 | H | 0.3141 | 0.1378 | 0.7626 | 0.01267 | Uiso | 1 | 0.136431 |
| H133 | H | 0.3872 | 0.923  | 0.6478 | 0.01267 | Uiso | 1 | 0.13873  |
| H134 | H | 0.5132 | 0.8344 | 0.6454 | 0.01267 | Uiso | 1 | 0.114028 |
| H135 | H | 0.8304 | 0.8938 | 0.6498 | 0.01267 | Uiso | 1 | 0.12307  |
| H136 | H | 0.6996 | 0.988  | 0.6534 | 0.01267 | Uiso | 1 | 0.128215 |
| H137 | H | 0.6652 | 0.0796 | 0.5316 | 0.01267 | Uiso | 1 | 0.137905 |
| H138 | H | 0.6845 | 0.1168 | 0.4736 | 0.01267 | Uiso | 1 | 0.118027 |
| H139 | H | 0.3155 | 0.1982 | 0.4898 | 0.01267 | Uiso | 1 | 0.11362  |
| H140 | H | 0.2938 | 0.161  | 0.5474 | 0.01267 | Uiso | 1 | 0.12595  |
| H141 | H | 0.6349 | 0.0646 | 0.921  | 0.01267 | Uiso | 1 | 0.106152 |
| H142 | H | 0.7794 | 0.0442 | 0.8208 | 0.01267 | Uiso | 1 | 0.125829 |
| H143 | H | 0.7549 | 0.9532 | 0.842  | 0.01267 | Uiso | 1 | 0.14098  |
| H144 | H | 0.7054 | 0.8892 | 0.8812 | 0.01267 | Uiso | 1 | 0.128727 |
| H145 | H | 0.6262 | 0.8204 | 0.919  | 0.01267 | Uiso | 1 | 0.127174 |
| H146 | H | 0.4442 | 0.9404 | 0.988  | 0.01267 | Uiso | 1 | 0.135291 |
| H147 | H | 0.5229 | 0.0072 | 0.948  | 0.01267 | Uiso | 1 | 0.123632 |
| H148 | H | 0.4529 | 0.8662 | 0.0294 | 0.01267 | Uiso | 1 | 0.095905 |
| H149 | H | 0.5082 | 0.765  | 0.9482 | 0.01267 | Uiso | 1 | 0.126584 |
| H150 | H | 0.4481 | 0.7146 | 0.0032 | 0.01267 | Uiso | 1 | 0.114727 |
| H151 | H | 0.1775 | 0.6512 | 0.3296 | 0.01267 | Uiso | 1 | 0.092405 |
| H152 | H | 0.1416 | 0.7182 | 0.3298 | 0.01267 | Uiso | 1 | 0.097334 |
| H153 | H | 0.4427 | 0.6306 | 0.3522 | 0.01267 | Uiso | 1 | 0.099944 |
| H154 | H | 0.4059 | 0.6326 | 0.394  | 0.01267 | Uiso | 1 | 0.091538 |
| H155 | H | 0.081  | 0.721  | 0.3968 | 0.01267 | Uiso | 1 | 0.095704 |
| H156 | H | 0.1037 | 0.6546 | 0.394  | 0.01267 | Uiso | 1 | 0.088517 |
| H157 | H | 0.3437 | 0.7356 | 0.3946 | 0.01267 | Uiso | 1 | 0.079146 |
| H158 | H | 0.3879 | 0.7354 | 0.3534 | 0.01267 | Uiso | 1 | 0.083822 |
| H159 | H | 0.0314 | 0.8428 | 0.3406 | 0.01267 | Uiso | 1 | 0.078866 |
| H160 | H | 0.9933 | 0.9088 | 0.335  | 0.01267 | Uiso | 1 | 0.085995 |
| H161 | H | 0.2693 | 0.9418 | 0.3696 | 0.01267 | Uiso | 1 | 0.091518 |
| H162 | H | 0.2691 | 0.9314 | 0.3288 | 0.01267 | Uiso | 1 | 0.092493 |
| H163 | H | 0.9987 | 0.9234 | 0.3964 | 0.01267 | Uiso | 1 | 0.107978 |
| H164 | H | 0.0433 | 0.8584 | 0.404  | 0.01267 | Uiso | 1 | 0.087255 |
| H165 | H | 0.3234 | 0.8316 | 0.337  | 0.01267 | Uiso | 1 | 0.098713 |
| H166 | H | 0.3264 | 0.84   | 0.3778 | 0.01267 | Uiso | 1 | 0.094275 |
| H167 | H | 0.1245 | 0.6874 | 0.2724 | 0.01267 | Uiso | 1 | 0.121431 |
| H168 | H | 0.1121 | 0.7086 | 0.2126 | 0.01267 | Uiso | 1 | 0.123438 |
| H169 | H | 0.4829 | 0.7262 | 0.1994 | 0.01267 | Uiso | 1 | 0.127907 |
| H170 | H | 0.4889 | 0.7086 | 0.2594 | 0.01267 | Uiso | 1 | 0.126699 |

|      |   |         |         |         |         |      |   |           |
|------|---|---------|---------|---------|---------|------|---|-----------|
| H171 | H | 0.2332  | 0.4954  | 0.3774  | 0.01267 | Uiso | 1 | 0.110016  |
| H172 | H | 0.3338  | 0.4066  | 0.391   | 0.01267 | Uiso | 1 | 0.121902  |
| H173 | H | 0.6693  | 0.4596  | 0.3864  | 0.01267 | Uiso | 1 | 0.10488   |
| H174 | H | 0.5571  | 0.5504  | 0.3748  | 0.01267 | Uiso | 1 | 0.113097  |
| H175 | H | 0.2701  | 0.6626  | 0.4892  | 0.01267 | Uiso | 1 | 0.128354  |
| H176 | H | 0.1444  | 0.663   | 0.545   | 0.01267 | Uiso | 1 | 0.115228  |
| H177 | H | 0.8213  | 0.6914  | 0.4998  | 0.01267 | Uiso | 1 | 0.104735  |
| H178 | H | 0.9406  | 0.6932  | 0.4436  | 0.01267 | Uiso | 1 | 0.117342  |
| H179 | H | 0.891   | 0.8616  | 0.3016  | 0.01267 | Uiso | 1 | 0.115855  |
| H180 | H | 0.7808  | 0.8556  | 0.255   | 0.01267 | Uiso | 1 | 0.117967  |
| H181 | H | 0.1144  | 0.8476  | 0.1898  | 0.01267 | Uiso | 1 | 0.117886  |
| H182 | H | 0.2145  | 0.8622  | 0.2374  | 0.01267 | Uiso | 1 | 0.136855  |
| H183 | H | 0.958   | 0.077   | 0.3522  | 0.01267 | Uiso | 1 | 0.137563  |
| H184 | H | 0.993   | 0.1656  | 0.3546  | 0.01267 | Uiso | 1 | 0.114012  |
| H185 | H | 0.374   | 0.1062  | 0.3502  | 0.01267 | Uiso | 1 | 0.120775  |
| H186 | H | 0.341   | 0.012   | 0.3466  | 0.01267 | Uiso | 1 | 0.128368  |
| H187 | H | 0.2764  | 0.9204  | 0.4684  | 0.01267 | Uiso | 1 | 0.139416  |
| H188 | H | 0.2749  | 0.8832  | 0.5264  | 0.01267 | Uiso | 1 | 0.118337  |
| H189 | H | 0.0035  | 0.8018  | 0.5102  | 0.01267 | Uiso | 1 | 0.113653  |
| H190 | H | 0.0022  | 0.839   | 0.4526  | 0.01267 | Uiso | 1 | 0.126046  |
| H191 | H | 0.6205  | 0.9354  | 0.079   | 0.01267 | Uiso | 1 | 0.106679  |
| H192 | H | 0.6444  | 0.9558  | 0.1792  | 0.01267 | Uiso | 1 | 0.126241  |
| H193 | H | 0.5501  | 0.0468  | 0.158   | 0.01267 | Uiso | 1 | 0.141038  |
| H194 | H | 0.4758  | 0.1108  | 0.1188  | 0.01267 | Uiso | 1 | 0.128516  |
| H195 | H | 0.3656  | 0.1796  | 0.081   | 0.01267 | Uiso | 1 | 0.126481  |
| H196 | H | 0.3726  | 0.0596  | 0.012   | 0.01267 | Uiso | 1 | 0.136614  |
| H197 | H | 0.4781  | 0.9928  | 0.052   | 0.01267 | Uiso | 1 | 0.124633  |
| H198 | H | 0.3485  | 0.1338  | 0.9706  | 0.01267 | Uiso | 1 | 0.095466  |
| H199 | H | 0.2214  | 0.235   | 0.0518  | 0.01267 | Uiso | 1 | 0.126566  |
| H200 | H | 0.1659  | 0.2854  | 0.9968  | 0.01267 | Uiso | 1 | 0.11483   |
| C1   | C | 0.19864 | 0.81482 | 0.8683  | 0.01267 | Uiso | 1 | 0.095069  |
| C2   | C | 0.14592 | 0.81502 | 0.83214 | 0.01267 | Uiso | 1 | -0.08537  |
| C3   | C | 0.2534  | 0.86782 | 0.87158 | 0.01267 | Uiso | 1 | -0.07729  |
| C4   | C | 0.08119 | 0.8143  | 0.89732 | 0.01267 | Uiso | 1 | -0.083112 |
| C5   | C | 0.29902 | 0.76432 | 0.87164 | 0.01267 | Uiso | 1 | -0.091558 |
| C6   | C | 0.28897 | 0.61538 | 0.86108 | 0.01267 | Uiso | 1 | 0.086788  |
| C7   | C | 0.19294 | 0.62368 | 0.83424 | 0.01267 | Uiso | 1 | -0.077675 |
| C8   | C | 0.40145 | 0.56332 | 0.85178 | 0.01267 | Uiso | 1 | -0.089235 |
| C9   | C | 0.21711 | 0.60748 | 0.8971  | 0.01267 | Uiso | 1 | -0.099783 |
| C10  | C | 0.35606 | 0.66502 | 0.86026 | 0.01267 | Uiso | 1 | -0.090117 |
| C11  | C | 0.25261 | 0.80404 | 0.77174 | 0.01267 | Uiso | 1 | 0.269849  |
| C12  | C | 0.14254 | 0.8044  | 0.75792 | 0.01267 | Uiso | 1 | -0.255477 |
| C13  | C | 0.14733 | 0.79266 | 0.72188 | 0.01267 | Uiso | 1 | -0.083849 |
| C14  | C | 0.26358 | 0.78328 | 0.70056 | 0.01267 | Uiso | 1 | -0.045272 |
| C15  | C | 0.37844 | 0.78176 | 0.71396 | 0.01267 | Uiso | 1 | -0.093518 |
| C16  | C | 0.37045 | 0.79232 | 0.74978 | 0.01267 | Uiso | 1 | -0.228133 |
| C17  | C | 0.26695 | 0.76754 | 0.66136 | 0.01267 | Uiso | 1 | 0.577716  |
| C18  | C | 0.16743 | 0.96814 | 0.8764  | 0.01267 | Uiso | 1 | 0.287257  |
| C19  | C | 0.05984 | 0.01202 | 0.8801  | 0.01267 | Uiso | 1 | -0.215832 |
| C20  | C | 0.06624 | 0.0649  | 0.88742 | 0.01267 | Uiso | 1 | -0.078094 |
| C21  | C | 0.18584 | 0.07638 | 0.88954 | 0.01267 | Uiso | 1 | -0.061972 |
| C22  | C | 0.29642 | 0.03318 | 0.88498 | 0.01267 | Uiso | 1 | -0.095593 |

|     |   |         |         |         |         |      |   |           |
|-----|---|---------|---------|---------|---------|------|---|-----------|
| C23 | C | 0.28311 | 0.97896 | 0.87822 | 0.01267 | Uiso | 1 | -0.259872 |
| C24 | C | 0.1991  | 0.13576 | 0.89804 | 0.01267 | Uiso | 1 | 0.564924  |
| C25 | C | 0.04613 | 0.82184 | 0.9613  | 0.01267 | Uiso | 1 | 0.275132  |
| C26 | C | 0.09775 | 0.83126 | 0.99104 | 0.01267 | Uiso | 1 | -0.225967 |
| C27 | C | 0.02194 | 0.83166 | 0.02446 | 0.01267 | Uiso | 1 | -0.074382 |
| C28 | C | 0.8994  | 0.82434 | 0.02706 | 0.01267 | Uiso | 1 | -0.049735 |
| C29 | C | 0.84794 | 0.81456 | 0.99736 | 0.01267 | Uiso | 1 | -0.090363 |
| C30 | C | 0.91961 | 0.81326 | 0.96372 | 0.01267 | Uiso | 1 | -0.256003 |
| C31 | C | 0.82086 | 0.82296 | 0.06272 | 0.01267 | Uiso | 1 | 0.575078  |
| C32 | C | 0.17479 | 0.6366  | 0.77422 | 0.01267 | Uiso | 1 | 0.281285  |
| C33 | C | 0.04595 | 0.63992 | 0.77858 | 0.01267 | Uiso | 1 | -0.250974 |
| C34 | C | 0.97508 | 0.64534 | 0.7511  | 0.01267 | Uiso | 1 | -0.087023 |
| C35 | C | 0.03547 | 0.6524  | 0.71706 | 0.01267 | Uiso | 1 | -0.064098 |
| C36 | C | 0.16779 | 0.64902 | 0.7126  | 0.01267 | Uiso | 1 | -0.072217 |
| C37 | C | 0.2362  | 0.6407  | 0.7411  | 0.01267 | Uiso | 1 | -0.215693 |
| C38 | C | 0.9582  | 0.66122 | 0.68738 | 0.01267 | Uiso | 1 | 0.584215  |
| C39 | C | 0.43417 | 0.46366 | 0.851   | 0.01267 | Uiso | 1 | 0.272343  |
| C40 | C | 0.37511 | 0.41762 | 0.85236 | 0.01267 | Uiso | 1 | -0.214822 |
| C41 | C | 0.44904 | 0.36514 | 0.85378 | 0.01267 | Uiso | 1 | -0.084577 |
| C42 | C | 0.58031 | 0.3553  | 0.85408 | 0.01267 | Uiso | 1 | -0.056521 |
| C43 | C | 0.63939 | 0.39994 | 0.85108 | 0.01267 | Uiso | 1 | -0.088061 |
| C44 | C | 0.56306 | 0.45696 | 0.84912 | 0.01267 | Uiso | 1 | -0.268711 |
| C45 | C | 0.66436 | 0.29762 | 0.85886 | 0.01267 | Uiso | 1 | 0.595735  |
| C46 | C | 0.26738 | 0.61818 | 0.95566 | 0.01267 | Uiso | 1 | 0.275787  |
| C47 | C | 0.36755 | 0.60382 | 0.97668 | 0.01267 | Uiso | 1 | -0.236003 |
| C48 | C | 0.3445  | 0.62732 | 0.01128 | 0.01267 | Uiso | 1 | -0.104042 |
| C49 | C | 0.23155 | 0.6649  | 0.0228  | 0.01267 | Uiso | 1 | -0.060399 |
| C50 | C | 0.13636 | 0.67526 | 0.00182 | 0.01267 | Uiso | 1 | -0.077998 |
| C51 | C | 0.1571  | 0.65198 | 0.96722 | 0.01267 | Uiso | 1 | -0.266538 |
| C52 | C | 0.21891 | 0.69452 | 0.05886 | 0.01267 | Uiso | 1 | 0.603867  |
| C53 | C | 0.81337 | 0.5493  | 0.60156 | 0.01267 | Uiso | 1 | 0.086143  |
| C54 | C | 0.84048 | 0.53664 | 0.656   | 0.01267 | Uiso | 1 | -0.025501 |
| C55 | C | 0.83524 | 0.4869  | 0.64522 | 0.01267 | Uiso | 1 | -0.136305 |
| C56 | C | 0.78408 | 0.45388 | 0.58696 | 0.01267 | Uiso | 1 | 0.17932   |
| C57 | C | 0.80582 | 0.39982 | 0.59714 | 0.01267 | Uiso | 1 | -0.166749 |
| C58 | C | 0.78064 | 0.3584  | 0.57432 | 0.01267 | Uiso | 1 | -0.17232  |
| C59 | C | 0.73557 | 0.37452 | 0.54294 | 0.01267 | Uiso | 1 | 0.18149   |
| C60 | C | 0.7131  | 0.4286  | 0.5334  | 0.01267 | Uiso | 1 | -0.174004 |
| C61 | C | 0.73856 | 0.4688  | 0.55788 | 0.01267 | Uiso | 1 | -0.170373 |
| C62 | C | 0.71888 | 0.33522 | 0.48462 | 0.01267 | Uiso | 1 | 0.09428   |
| C63 | C | 0.70847 | 0.28    | 0.52886 | 0.01267 | Uiso | 1 | -0.163609 |
| C64 | C | 0.70265 | 0.25274 | 0.49856 | 0.01267 | Uiso | 1 | -0.014028 |
| C65 | C | 0.88176 | 0.18518 | 0.1317  | 0.01267 | Uiso | 1 | 0.096622  |
| C66 | C | 0.79308 | 0.18498 | 0.16786 | 0.01267 | Uiso | 1 | -0.08597  |
| C67 | C | 0.9928  | 0.13218 | 0.12842 | 0.01267 | Uiso | 1 | -0.078695 |
| C68 | C | 0.79281 | 0.1857  | 0.10268 | 0.01267 | Uiso | 1 | -0.085196 |
| C69 | C | 0.93498 | 0.23568 | 0.12836 | 0.01267 | Uiso | 1 | -0.097612 |
| C70 | C | 0.76543 | 0.38462 | 0.13892 | 0.01267 | Uiso | 1 | 0.086569  |
| C71 | C | 0.65086 | 0.37632 | 0.16576 | 0.01267 | Uiso | 1 | -0.074304 |
| C72 | C | 0.81655 | 0.43668 | 0.14822 | 0.01267 | Uiso | 1 | -0.094366 |
| C73 | C | 0.72169 | 0.39252 | 0.1029  | 0.01267 | Uiso | 1 | -0.093584 |
| C74 | C | 0.88134 | 0.33498 | 0.13974 | 0.01267 | Uiso | 1 | -0.088787 |

|      |   |         |         |         |         |      |   |           |
|------|---|---------|---------|---------|---------|------|---|-----------|
| C75  | C | 0.82839 | 0.19596 | 0.22826 | 0.01267 | Uiso | 1 | 0.269343  |
| C76  | C | 0.70486 | 0.1956  | 0.24208 | 0.01267 | Uiso | 1 | -0.253465 |
| C77  | C | 0.66187 | 0.20734 | 0.27812 | 0.01267 | Uiso | 1 | -0.083236 |
| C78  | C | 0.74742 | 0.21672 | 0.29944 | 0.01267 | Uiso | 1 | -0.049137 |
| C79  | C | 0.87416 | 0.21824 | 0.28604 | 0.01267 | Uiso | 1 | -0.090186 |
| C80  | C | 0.91255 | 0.20768 | 0.25022 | 0.01267 | Uiso | 1 | -0.22629  |
| C81  | C | 0.69585 | 0.23246 | 0.33864 | 0.01267 | Uiso | 1 | 0.575457  |
| C82  | C | 0.01197 | 0.03186 | 0.1236  | 0.01267 | Uiso | 1 | 0.286522  |
| C83  | C | 0.95196 | 0.98798 | 0.1199  | 0.01267 | Uiso | 1 | -0.215288 |
| C84  | C | 0.01856 | 0.9351  | 0.11258 | 0.01267 | Uiso | 1 | -0.076149 |
| C85  | C | 0.15176 | 0.92362 | 0.11046 | 0.01267 | Uiso | 1 | -0.061927 |
| C86  | C | 0.21458 | 0.96682 | 0.11502 | 0.01267 | Uiso | 1 | -0.096849 |
| C87  | C | 0.14029 | 0.02104 | 0.12178 | 0.01267 | Uiso | 1 | -0.259252 |
| C88  | C | 0.2329  | 0.86424 | 0.10196 | 0.01267 | Uiso | 1 | 0.566574  |
| C89  | C | 0.82927 | 0.17816 | 0.0387  | 0.01267 | Uiso | 1 | 0.274786  |
| C90  | C | 0.92005 | 0.16874 | 0.00896 | 0.01267 | Uiso | 1 | -0.224842 |
| C91  | C | 0.87806 | 0.16834 | 0.97554 | 0.01267 | Uiso | 1 | -0.077688 |
| C92  | C | 0.7508  | 0.17566 | 0.97294 | 0.01267 | Uiso | 1 | -0.050023 |
| C93  | C | 0.65986 | 0.18544 | 0.00264 | 0.01267 | Uiso | 1 | -0.091078 |
| C94  | C | 0.69659 | 0.18674 | 0.03628 | 0.01267 | Uiso | 1 | -0.254044 |
| C95  | C | 0.70654 | 0.17704 | 0.93728 | 0.01267 | Uiso | 1 | 0.574915  |
| C96  | C | 0.58561 | 0.3634  | 0.22578 | 0.01267 | Uiso | 1 | 0.282601  |
| C97  | C | 0.46445 | 0.36008 | 0.22142 | 0.01267 | Uiso | 1 | -0.249793 |
| C98  | C | 0.37152 | 0.35466 | 0.2489  | 0.01267 | Uiso | 1 | -0.093772 |
| C99  | C | 0.40493 | 0.3476  | 0.28294 | 0.01267 | Uiso | 1 | -0.057363 |
| C100 | C | 0.52941 | 0.35098 | 0.2874  | 0.01267 | Uiso | 1 | -0.073882 |
| C101 | C | 0.618   | 0.3593  | 0.2589  | 0.01267 | Uiso | 1 | -0.217674 |
| C102 | C | 0.3068  | 0.33878 | 0.31262 | 0.01267 | Uiso | 1 | 0.582848  |
| C103 | C | 0.74883 | 0.53634 | 0.149   | 0.01267 | Uiso | 1 | 0.273096  |
| C104 | C | 0.64509 | 0.58238 | 0.14764 | 0.01267 | Uiso | 1 | -0.218678 |
| C105 | C | 0.66796 | 0.63486 | 0.14622 | 0.01267 | Uiso | 1 | -0.084741 |
| C106 | C | 0.78969 | 0.6447  | 0.14592 | 0.01267 | Uiso | 1 | -0.052417 |
| C107 | C | 0.89041 | 0.60006 | 0.14892 | 0.01267 | Uiso | 1 | -0.089051 |
| C108 | C | 0.86914 | 0.54304 | 0.15088 | 0.01267 | Uiso | 1 | -0.270075 |
| C109 | C | 0.82084 | 0.70238 | 0.14114 | 0.01267 | Uiso | 1 | 0.593948  |
| C110 | C | 0.84122 | 0.38182 | 0.04434 | 0.01267 | Uiso | 1 | 0.276336  |
| C111 | C | 0.94805 | 0.39618 | 0.02332 | 0.01267 | Uiso | 1 | -0.23568  |
| C112 | C | 0.9831  | 0.37268 | 0.98872 | 0.01267 | Uiso | 1 | -0.106793 |
| C113 | C | 0.91925 | 0.3351  | 0.9772  | 0.01267 | Uiso | 1 | -0.059788 |
| C114 | C | 0.81344 | 0.32474 | 0.99818 | 0.01267 | Uiso | 1 | -0.076471 |
| C115 | C | 0.7763  | 0.34802 | 0.03278 | 0.01267 | Uiso | 1 | -0.255833 |
| C116 | C | 0.97229 | 0.30548 | 0.94114 | 0.01267 | Uiso | 1 | 0.602418  |
| C117 | C | 0.96423 | 0.4507  | 0.39844 | 0.01267 | Uiso | 1 | 0.083419  |
| C118 | C | 0.03312 | 0.46336 | 0.344   | 0.01267 | Uiso | 1 | -0.028449 |
| C119 | C | 0.96736 | 0.5131  | 0.35478 | 0.01267 | Uiso | 1 | -0.13384  |
| C120 | C | 0.82492 | 0.54612 | 0.41304 | 0.01267 | Uiso | 1 | 0.177117  |
| C121 | C | 0.80278 | 0.60018 | 0.40286 | 0.01267 | Uiso | 1 | -0.167271 |
| C122 | C | 0.71336 | 0.6416  | 0.42568 | 0.01267 | Uiso | 1 | -0.173083 |
| C123 | C | 0.65303 | 0.62548 | 0.45706 | 0.01267 | Uiso | 1 | 0.181812  |
| C124 | C | 0.6751  | 0.5714  | 0.4666  | 0.01267 | Uiso | 1 | -0.174386 |
| C125 | C | 0.76524 | 0.5312  | 0.44212 | 0.01267 | Uiso | 1 | -0.170965 |
| C126 | C | 0.53872 | 0.66478 | 0.51538 | 0.01267 | Uiso | 1 | 0.092445  |

|      |   |         |         |         |         |      |   |           |
|------|---|---------|---------|---------|---------|------|---|-----------|
| C127 | C | 0.51733 | 0.72    | 0.47114 | 0.01267 | Uiso | 1 | -0.161796 |
| C128 | C | 0.45395 | 0.74726 | 0.50144 | 0.01267 | Uiso | 1 | -0.01549  |
| C129 | C | 0.31694 | 0.31482 | 0.6317  | 0.01267 | Uiso | 1 | 0.096677  |
| C130 | C | 0.22806 | 0.31502 | 0.66786 | 0.01267 | Uiso | 1 | -0.090978 |
| C131 | C | 0.37498 | 0.36782 | 0.62842 | 0.01267 | Uiso | 1 | -0.078816 |
| C132 | C | 0.22851 | 0.3143  | 0.60268 | 0.01267 | Uiso | 1 | -0.08365  |
| C133 | C | 0.42066 | 0.26432 | 0.62836 | 0.01267 | Uiso | 1 | -0.092695 |
| C134 | C | 0.40005 | 0.11538 | 0.63892 | 0.01267 | Uiso | 1 | 0.085845  |
| C135 | C | 0.27718 | 0.12368 | 0.66576 | 0.01267 | Uiso | 1 | -0.0757   |
| C136 | C | 0.50323 | 0.06332 | 0.64822 | 0.01267 | Uiso | 1 | -0.085766 |
| C137 | C | 0.36421 | 0.10748 | 0.6029  | 0.01267 | Uiso | 1 | -0.098431 |
| C138 | C | 0.46632 | 0.16502 | 0.63974 | 0.01267 | Uiso | 1 | -0.092893 |
| C139 | C | 0.27435 | 0.30404 | 0.72826 | 0.01267 | Uiso | 1 | 0.268611  |
| C140 | C | 0.15046 | 0.3044  | 0.74208 | 0.01267 | Uiso | 1 | -0.254632 |
| C141 | C | 0.11921 | 0.29266 | 0.77812 | 0.01267 | Uiso | 1 | -0.083381 |
| C142 | C | 0.21414 | 0.28328 | 0.79944 | 0.01267 | Uiso | 1 | -0.047706 |
| C143 | C | 0.3424  | 0.28176 | 0.78604 | 0.01267 | Uiso | 1 | -0.101353 |
| C144 | C | 0.37023 | 0.29232 | 0.75022 | 0.01267 | Uiso | 1 | -0.225017 |
| C145 | C | 0.17831 | 0.26754 | 0.83864 | 0.01267 | Uiso | 1 | 0.575787  |
| C146 | C | 0.29383 | 0.46814 | 0.6236  | 0.01267 | Uiso | 1 | 0.284583  |
| C147 | C | 0.18994 | 0.51202 | 0.6199  | 0.01267 | Uiso | 1 | -0.212764 |
| C148 | C | 0.20366 | 0.5649  | 0.61258 | 0.01267 | Uiso | 1 | -0.079229 |
| C149 | C | 0.32538 | 0.57638 | 0.61046 | 0.01267 | Uiso | 1 | -0.060657 |
| C150 | C | 0.4314  | 0.53318 | 0.61502 | 0.01267 | Uiso | 1 | -0.099333 |
| C151 | C | 0.41133 | 0.47896 | 0.62178 | 0.01267 | Uiso | 1 | -0.26065  |
| C152 | C | 0.34714 | 0.63576 | 0.60196 | 0.01267 | Uiso | 1 | 0.566456  |
| C153 | C | 0.25743 | 0.32184 | 0.5387  | 0.01267 | Uiso | 1 | 0.277277  |
| C154 | C | 0.33879 | 0.33126 | 0.50896 | 0.01267 | Uiso | 1 | -0.224333 |
| C155 | C | 0.2964  | 0.33166 | 0.47554 | 0.01267 | Uiso | 1 | -0.076201 |
| C156 | C | 0.17646 | 0.32434 | 0.47294 | 0.01267 | Uiso | 1 | -0.050937 |
| C157 | C | 0.0953  | 0.31456 | 0.50264 | 0.01267 | Uiso | 1 | -0.089188 |
| C158 | C | 0.13333 | 0.31326 | 0.53628 | 0.01267 | Uiso | 1 | -0.256816 |
| C159 | C | 0.13358 | 0.32296 | 0.43728 | 0.01267 | Uiso | 1 | 0.574532  |
| C160 | C | 0.19901 | 0.1366  | 0.72578 | 0.01267 | Uiso | 1 | 0.280551  |
| C161 | C | 0.07453 | 0.13992 | 0.72142 | 0.01267 | Uiso | 1 | -0.24733  |
| C162 | C | 0.97618 | 0.14534 | 0.7489  | 0.01267 | Uiso | 1 | -0.091522 |
| C163 | C | 0.00253 | 0.1524  | 0.78294 | 0.01267 | Uiso | 1 | -0.059155 |
| C164 | C | 0.13039 | 0.14902 | 0.7874  | 0.01267 | Uiso | 1 | -0.072631 |
| C165 | C | 0.2273  | 0.1407  | 0.7589  | 0.01267 | Uiso | 1 | -0.215821 |
| C166 | C | 0.89558 | 0.16122 | 0.81262 | 0.01267 | Uiso | 1 | 0.582112  |
| C167 | C | 0.53517 | 0.96366 | 0.649   | 0.01267 | Uiso | 1 | 0.273642  |
| C168 | C | 0.47747 | 0.91762 | 0.64764 | 0.01267 | Uiso | 1 | -0.217975 |
| C169 | C | 0.55282 | 0.86514 | 0.64622 | 0.01267 | Uiso | 1 | -0.084999 |
| C170 | C | 0.68439 | 0.8553  | 0.64592 | 0.01267 | Uiso | 1 | -0.053267 |
| C171 | C | 0.74047 | 0.89994 | 0.64892 | 0.01267 | Uiso | 1 | -0.091575 |
| C172 | C | 0.66218 | 0.95696 | 0.65088 | 0.01267 | Uiso | 1 | -0.268181 |
| C173 | C | 0.77322 | 0.79762 | 0.64114 | 0.01267 | Uiso | 1 | 0.595595  |
| C174 | C | 0.47304 | 0.11818 | 0.54434 | 0.01267 | Uiso | 1 | 0.279382  |
| C175 | C | 0.59423 | 0.10382 | 0.52332 | 0.01267 | Uiso | 1 | -0.234808 |
| C176 | C | 0.60578 | 0.12732 | 0.48872 | 0.01267 | Uiso | 1 | -0.10887  |
| C177 | C | 0.50435 | 0.1649  | 0.4772  | 0.01267 | Uiso | 1 | -0.059867 |
| C178 | C | 0.38818 | 0.17526 | 0.49818 | 0.01267 | Uiso | 1 | -0.075034 |

|      |   |         |         |         |         |      |   |           |
|------|---|---------|---------|---------|---------|------|---|-----------|
| C179 | C | 0.37432 | 0.15198 | 0.53278 | 0.01267 | Uiso | 1 | -0.260734 |
| C180 | C | 0.52777 | 0.19452 | 0.44114 | 0.01267 | Uiso | 1 | 0.604     |
| C181 | C | 0.66493 | 0.0493  | 0.89844 | 0.01267 | Uiso | 1 | 0.082872  |
| C182 | C | 0.74648 | 0.03664 | 0.844   | 0.01267 | Uiso | 1 | -0.026166 |
| C183 | C | 0.73046 | 0.9869  | 0.85478 | 0.01267 | Uiso | 1 | -0.136078 |
| C184 | C | 0.62104 | 0.95388 | 0.91304 | 0.01267 | Uiso | 1 | 0.177622  |
| C185 | C | 0.65296 | 0.89982 | 0.90286 | 0.01267 | Uiso | 1 | -0.16551  |
| C186 | C | 0.60496 | 0.8584  | 0.92568 | 0.01267 | Uiso | 1 | -0.175039 |
| C187 | C | 0.52851 | 0.87452 | 0.95706 | 0.01267 | Uiso | 1 | 0.186033  |
| C188 | C | 0.4965  | 0.9286  | 0.9666  | 0.01267 | Uiso | 1 | -0.174224 |
| C189 | C | 0.54644 | 0.9688  | 0.94212 | 0.01267 | Uiso | 1 | -0.171149 |
| C190 | C | 0.4535  | 0.83522 | 0.01538 | 0.01267 | Uiso | 1 | 0.097581  |
| C191 | C | 0.48733 | 0.78    | 0.97114 | 0.01267 | Uiso | 1 | -0.156107 |
| C192 | C | 0.45121 | 0.75274 | 0.00144 | 0.01267 | Uiso | 1 | -0.016148 |
| C193 | C | 0.26346 | 0.68518 | 0.3683  | 0.01267 | Uiso | 1 | 0.0971    |
| C194 | C | 0.21094 | 0.68498 | 0.33214 | 0.01267 | Uiso | 1 | -0.084405 |
| C195 | C | 0.37122 | 0.63218 | 0.37158 | 0.01267 | Uiso | 1 | -0.078125 |
| C196 | C | 0.14549 | 0.6857  | 0.39732 | 0.01267 | Uiso | 1 | -0.083722 |
| C197 | C | 0.31334 | 0.73568 | 0.37164 | 0.01267 | Uiso | 1 | -0.093796 |
| C198 | C | 0.15435 | 0.88462 | 0.36108 | 0.01267 | Uiso | 1 | 0.085799  |
| C199 | C | 0.06662 | 0.87632 | 0.33424 | 0.01267 | Uiso | 1 | -0.076814 |
| C200 | C | 0.21477 | 0.93668 | 0.35178 | 0.01267 | Uiso | 1 | -0.08585  |
| C201 | C | 0.07459 | 0.89252 | 0.3971  | 0.01267 | Uiso | 1 | -0.094737 |
| C202 | C | 0.27108 | 0.83498 | 0.36026 | 0.01267 | Uiso | 1 | -0.091737 |
| C203 | C | 0.30665 | 0.69596 | 0.27174 | 0.01267 | Uiso | 1 | 0.271757  |
| C204 | C | 0.19694 | 0.6956  | 0.25792 | 0.01267 | Uiso | 1 | -0.257436 |
| C205 | C | 0.18999 | 0.70734 | 0.22188 | 0.01267 | Uiso | 1 | -0.081744 |
| C206 | C | 0.29686 | 0.71672 | 0.20056 | 0.01267 | Uiso | 1 | -0.049307 |
| C207 | C | 0.4102  | 0.71824 | 0.21396 | 0.01267 | Uiso | 1 | -0.091447 |
| C208 | C | 0.41277 | 0.70768 | 0.24978 | 0.01267 | Uiso | 1 | -0.227322 |
| C209 | C | 0.28449 | 0.73246 | 0.16136 | 0.01267 | Uiso | 1 | 0.580659  |
| C210 | C | 0.38557 | 0.53186 | 0.3764  | 0.01267 | Uiso | 1 | 0.286648  |
| C211 | C | 0.32186 | 0.48798 | 0.3801  | 0.01267 | Uiso | 1 | -0.21416  |
| C212 | C | 0.38114 | 0.4351  | 0.38742 | 0.01267 | Uiso | 1 | -0.077668 |
| C213 | C | 0.51222 | 0.42362 | 0.38954 | 0.01267 | Uiso | 1 | -0.059495 |
| C214 | C | 0.5796  | 0.46682 | 0.38498 | 0.01267 | Uiso | 1 | -0.098691 |
| C215 | C | 0.51207 | 0.52104 | 0.37822 | 0.01267 | Uiso | 1 | -0.255837 |
| C216 | C | 0.58486 | 0.36424 | 0.39804 | 0.01267 | Uiso | 1 | 0.566455  |
| C217 | C | 0.11797 | 0.67816 | 0.4613  | 0.01267 | Uiso | 1 | 0.275991  |
| C218 | C | 0.17901 | 0.66874 | 0.49104 | 0.01267 | Uiso | 1 | -0.229177 |
| C219 | C | 0.1036  | 0.66834 | 0.52446 | 0.01267 | Uiso | 1 | -0.072977 |
| C220 | C | 0.97374 | 0.67566 | 0.52706 | 0.01267 | Uiso | 1 | -0.05025  |
| C221 | C | 0.9125  | 0.68544 | 0.49736 | 0.01267 | Uiso | 1 | -0.091469 |
| C222 | C | 0.98287 | 0.68674 | 0.46372 | 0.01267 | Uiso | 1 | -0.25535  |
| C223 | C | 0.89382 | 0.67704 | 0.56272 | 0.01267 | Uiso | 1 | 0.57349   |
| C224 | C | 0.06139 | 0.8634  | 0.27422 | 0.01267 | Uiso | 1 | 0.28222   |
| C225 | C | 0.93587 | 0.86008 | 0.27858 | 0.01267 | Uiso | 1 | -0.248892 |
| C226 | C | 0.87042 | 0.85466 | 0.2511  | 0.01267 | Uiso | 1 | -0.093746 |
| C227 | C | 0.93787 | 0.8476  | 0.21706 | 0.01267 | Uiso | 1 | -0.061818 |
| C228 | C | 0.06681 | 0.85098 | 0.2126  | 0.01267 | Uiso | 1 | -0.072448 |
| C229 | C | 0.1269  | 0.8593  | 0.2411  | 0.01267 | Uiso | 1 | -0.216599 |
| C230 | C | 0.86942 | 0.83878 | 0.18738 | 0.01267 | Uiso | 1 | 0.585465  |

|      |   |         |         |         |         |      |   |           |
|------|---|---------|---------|---------|---------|------|---|-----------|
| C231 | C | 0.14783 | 0.03634 | 0.351   | 0.01267 | Uiso | 1 | 0.270818  |
| C232 | C | 0.04273 | 0.08238 | 0.35236 | 0.01267 | Uiso | 1 | -0.213499 |
| C233 | C | 0.06418 | 0.13486 | 0.35378 | 0.01267 | Uiso | 1 | -0.087235 |
| C234 | C | 0.18561 | 0.1447  | 0.35408 | 0.01267 | Uiso | 1 | -0.053463 |
| C235 | C | 0.28933 | 0.10006 | 0.35108 | 0.01267 | Uiso | 1 | -0.089014 |
| C236 | C | 0.27002 | 0.04304 | 0.34912 | 0.01267 | Uiso | 1 | -0.267821 |
| C237 | C | 0.21198 | 0.20238 | 0.35886 | 0.01267 | Uiso | 1 | 0.59551   |
| C238 | C | 0.13556 | 0.88182 | 0.45566 | 0.01267 | Uiso | 1 | 0.280498  |
| C239 | C | 0.22137 | 0.89618 | 0.47668 | 0.01267 | Uiso | 1 | -0.237474 |
| C240 | C | 0.22182 | 0.87268 | 0.51128 | 0.01267 | Uiso | 1 | -0.108101 |
| C241 | C | 0.14645 | 0.8351  | 0.5228  | 0.01267 | Uiso | 1 | -0.058402 |
| C242 | C | 0.06162 | 0.82474 | 0.50182 | 0.01267 | Uiso | 1 | -0.077088 |
| C243 | C | 0.05908 | 0.84802 | 0.46722 | 0.01267 | Uiso | 1 | -0.25784  |
| C244 | C | 0.16343 | 0.80548 | 0.55886 | 0.01267 | Uiso | 1 | 0.599603  |
| C245 | C | 0.61267 | 0.9507  | 0.10156 | 0.01267 | Uiso | 1 | 0.084772  |
| C246 | C | 0.62712 | 0.96336 | 0.156   | 0.01267 | Uiso | 1 | -0.026496 |
| C247 | C | 0.57214 | 0.0131  | 0.14522 | 0.01267 | Uiso | 1 | -0.134561 |
| C248 | C | 0.48796 | 0.04612 | 0.08696 | 0.01267 | Uiso | 1 | 0.180398  |
| C249 | C | 0.45564 | 0.10018 | 0.09714 | 0.01267 | Uiso | 1 | -0.16687  |
| C250 | C | 0.38904 | 0.1416  | 0.07432 | 0.01267 | Uiso | 1 | -0.17132  |
| C251 | C | 0.36009 | 0.12548 | 0.04294 | 0.01267 | Uiso | 1 | 0.178807  |
| C252 | C | 0.3917  | 0.0714  | 0.0334  | 0.01267 | Uiso | 1 | -0.174892 |
| C253 | C | 0.45736 | 0.0312  | 0.05788 | 0.01267 | Uiso | 1 | -0.172423 |
| C254 | C | 0.3041  | 0.16478 | 0.98462 | 0.01267 | Uiso | 1 | 0.094042  |
| C255 | C | 0.23847 | 0.22    | 0.02886 | 0.01267 | Uiso | 1 | -0.162171 |
| C256 | C | 0.20539 | 0.24726 | 0.99856 | 0.01267 | Uiso | 1 | -0.01478  |
| N1   | N | 0.83002 | 0.57814 | 0.62902 | 0.01267 | Uiso | 1 | -0.26072  |
| N2   | N | 0.80828 | 0.49512 | 0.61012 | 0.01267 | Uiso | 1 | 0.035593  |
| N3   | N | 0.69946 | 0.28908 | 0.4718  | 0.01267 | Uiso | 1 | -0.248511 |
| N4   | N | 0.71779 | 0.33422 | 0.519   | 0.01267 | Uiso | 1 | 0.053677  |
| N5   | N | 0.03718 | 0.42186 | 0.37098 | 0.01267 | Uiso | 1 | -0.258843 |
| N6   | N | 0.91352 | 0.50488 | 0.38988 | 0.01267 | Uiso | 1 | 0.037805  |
| N7   | N | 0.46034 | 0.71092 | 0.5282  | 0.01267 | Uiso | 1 | -0.245629 |
| N8   | N | 0.57101 | 0.66578 | 0.481   | 0.01267 | Uiso | 1 | 0.052509  |
| N9   | N | 0.70904 | 0.07814 | 0.87098 | 0.01267 | Uiso | 1 | -0.260654 |
| N10  | N | 0.6684  | 0.99512 | 0.88988 | 0.01267 | Uiso | 1 | 0.036056  |
| N11  | N | 0.42126 | 0.78908 | 0.0282  | 0.01267 | Uiso | 1 | -0.243496 |
| N12  | N | 0.48679 | 0.83422 | 0.981   | 0.01267 | Uiso | 1 | 0.037155  |
| N13  | N | 0.65816 | 0.92186 | 0.12902 | 0.01267 | Uiso | 1 | -0.260183 |
| N14  | N | 0.5534  | 0.00488 | 0.11012 | 0.01267 | Uiso | 1 | 0.035885  |
| N15  | N | 0.23854 | 0.21092 | 0.9718  | 0.01267 | Uiso | 1 | -0.24633  |
| N16  | N | 0.30201 | 0.16578 | 0.019   | 0.01267 | Uiso | 1 | 0.052559  |
| O1   | O | 0.25211 | 0.71546 | 0.86832 | 0.01267 | Uiso | 1 | -0.214397 |
| O2   | O | 0.25998 | 0.81416 | 0.80648 | 0.01267 | Uiso | 1 | -0.202824 |
| O3   | O | 0.14506 | 0.9166  | 0.87008 | 0.01267 | Uiso | 1 | -0.204967 |
| O4   | O | 0.12969 | 0.82028 | 0.93014 | 0.01267 | Uiso | 1 | -0.199316 |
| O5   | O | 0.25318 | 0.62976 | 0.80068 | 0.01267 | Uiso | 1 | -0.178146 |
| O6   | O | 0.34623 | 0.51524 | 0.8509  | 0.01267 | Uiso | 1 | -0.200988 |
| O7   | O | 0.30467 | 0.59546 | 0.9222  | 0.01267 | Uiso | 1 | -0.1971   |
| O8   | O | 0.1614  | 0.76846 | 0.65154 | 0.01267 | Uiso | 1 | -0.512589 |
| O9   | O | 0.37818 | 0.75622 | 0.64222 | 0.01267 | Uiso | 1 | -0.510018 |
| O10  | O | 0.09885 | 0.17548 | 0.90242 | 0.01267 | Uiso | 1 | -0.501042 |

|     |   |         |         |         |         |      |   |           |
|-----|---|---------|---------|---------|---------|------|---|-----------|
| O11 | O | 0.30743 | 0.14322 | 0.90092 | 0.01267 | Uiso | 1 | -0.490842 |
| O12 | O | 0.70111 | 0.82928 | 0.0665  | 0.01267 | Uiso | 1 | -0.523391 |
| O13 | O | 0.87838 | 0.81906 | 0.09098 | 0.01267 | Uiso | 1 | -0.510328 |
| O14 | O | 0.84281 | 0.6592  | 0.69078 | 0.01267 | Uiso | 1 | -0.480138 |
| O15 | O | 0.01499 | 0.6705  | 0.65672 | 0.01267 | Uiso | 1 | -0.540291 |
| O16 | O | 0.60311 | 0.25672 | 0.86086 | 0.01267 | Uiso | 1 | -0.536546 |
| O17 | O | 0.77951 | 0.2927  | 0.85988 | 0.01267 | Uiso | 1 | -0.483582 |
| O18 | O | 0.10427 | 0.71654 | 0.07112 | 0.01267 | Uiso | 1 | -0.499758 |
| O19 | O | 0.32097 | 0.6944  | 0.07006 | 0.01267 | Uiso | 1 | -0.499752 |
| O20 | O | 0.83589 | 0.28454 | 0.13168 | 0.01267 | Uiso | 1 | -0.215065 |
| O21 | O | 0.88062 | 0.18584 | 0.19352 | 0.01267 | Uiso | 1 | -0.203493 |
| O22 | O | 0.93174 | 0.0834  | 0.12992 | 0.01267 | Uiso | 1 | -0.204369 |
| O23 | O | 0.88011 | 0.17972 | 0.06986 | 0.01267 | Uiso | 1 | -0.199113 |
| O24 | O | 0.68362 | 0.37024 | 0.19932 | 0.01267 | Uiso | 1 | -0.179011 |
| O25 | O | 0.71237 | 0.48476 | 0.1491  | 0.01267 | Uiso | 1 | -0.201577 |
| O26 | O | 0.82233 | 0.40454 | 0.0778  | 0.01267 | Uiso | 1 | -0.194401 |
| O27 | O | 0.5814  | 0.23154 | 0.34846 | 0.01267 | Uiso | 1 | -0.512774 |
| O28 | O | 0.77662 | 0.24378 | 0.35778 | 0.01267 | Uiso | 1 | -0.508159 |
| O29 | O | 0.17675 | 0.82452 | 0.09758 | 0.01267 | Uiso | 1 | -0.502653 |
| O30 | O | 0.35157 | 0.85678 | 0.09908 | 0.01267 | Uiso | 1 | -0.491034 |
| O31 | O | 0.59689 | 0.17072 | 0.9335  | 0.01267 | Uiso | 1 | -0.523659 |
| O32 | O | 0.78842 | 0.18094 | 0.90902 | 0.01267 | Uiso | 1 | -0.514566 |
| O33 | O | 0.19279 | 0.3408  | 0.30922 | 0.01267 | Uiso | 1 | -0.476779 |
| O34 | O | 0.34221 | 0.3295  | 0.34328 | 0.01267 | Uiso | 1 | -0.547528 |
| O35 | O | 0.72069 | 0.74328 | 0.13914 | 0.01267 | Uiso | 1 | -0.538849 |
| O36 | O | 0.93209 | 0.7073  | 0.14012 | 0.01267 | Uiso | 1 | -0.482108 |
| O37 | O | 0.89193 | 0.28346 | 0.92888 | 0.01267 | Uiso | 1 | -0.498067 |
| O38 | O | 0.08543 | 0.3056  | 0.92994 | 0.01267 | Uiso | 1 | -0.498682 |
| O39 | O | 0.37043 | 0.21546 | 0.63168 | 0.01267 | Uiso | 1 | -0.214402 |
| O40 | O | 0.31646 | 0.31416 | 0.69352 | 0.01267 | Uiso | 1 | -0.203233 |
| O41 | O | 0.26514 | 0.4166  | 0.62992 | 0.01267 | Uiso | 1 | -0.20532  |
| O42 | O | 0.30983 | 0.32028 | 0.56986 | 0.01267 | Uiso | 1 | -0.200841 |
| O43 | O | 0.30386 | 0.12976 | 0.69932 | 0.01267 | Uiso | 1 | -0.177911 |
| O44 | O | 0.44713 | 0.01524 | 0.6491  | 0.01267 | Uiso | 1 | -0.202257 |
| O45 | O | 0.47687 | 0.09546 | 0.5778  | 0.01267 | Uiso | 1 | -0.196792 |
| O46 | O | 0.06294 | 0.26846 | 0.84846 | 0.01267 | Uiso | 1 | -0.511674 |
| O47 | O | 0.2704  | 0.25622 | 0.85778 | 0.01267 | Uiso | 1 | -0.510256 |
| O48 | O | 0.25127 | 0.67548 | 0.59758 | 0.01267 | Uiso | 1 | -0.501958 |
| O49 | O | 0.45835 | 0.64322 | 0.59908 | 0.01267 | Uiso | 1 | -0.492191 |
| O50 | O | 0.01761 | 0.32928 | 0.4335  | 0.01267 | Uiso | 1 | -0.522259 |
| O51 | O | 0.21936 | 0.31906 | 0.40902 | 0.01267 | Uiso | 1 | -0.510922 |
| O52 | O | 0.78359 | 0.1592  | 0.80922 | 0.01267 | Uiso | 1 | -0.477794 |
| O53 | O | 0.92171 | 0.1705  | 0.84328 | 0.01267 | Uiso | 1 | -0.536938 |
| O54 | O | 0.71397 | 0.75672 | 0.63914 | 0.01267 | Uiso | 1 | -0.538691 |
| O55 | O | 0.88939 | 0.7927  | 0.64012 | 0.01267 | Uiso | 1 | -0.483784 |
| O56 | O | 0.42539 | 0.21654 | 0.42888 | 0.01267 | Uiso | 1 | -0.498782 |
| O57 | O | 0.64103 | 0.1944  | 0.42994 | 0.01267 | Uiso | 1 | -0.4976   |
| O58 | O | 0.21757 | 0.78454 | 0.36832 | 0.01267 | Uiso | 1 | -0.213572 |
| O59 | O | 0.32414 | 0.68584 | 0.30648 | 0.01267 | Uiso | 1 | -0.203508 |
| O60 | O | 0.31166 | 0.5834  | 0.37008 | 0.01267 | Uiso | 1 | -0.205184 |
| O61 | O | 0.19997 | 0.67972 | 0.43014 | 0.01267 | Uiso | 1 | -0.19962  |
| O62 | O | 0.13294 | 0.87024 | 0.30068 | 0.01267 | Uiso | 1 | -0.17787  |

|     |   |         |         |         |         |      |   |           |
|-----|---|---------|---------|---------|---------|------|---|-----------|
| O63 | O | 0.11147 | 0.98476 | 0.3509  | 0.01267 | Uiso | 1 | -0.201062 |
| O64 | O | 0.15013 | 0.90454 | 0.4222  | 0.01267 | Uiso | 1 | -0.195828 |
| O65 | O | 0.17986 | 0.73154 | 0.15154 | 0.01267 | Uiso | 1 | -0.513983 |
| O66 | O | 0.3844  | 0.74378 | 0.14222 | 0.01267 | Uiso | 1 | -0.511557 |
| O67 | O | 0.52433 | 0.32452 | 0.40242 | 0.01267 | Uiso | 1 | -0.503228 |
| O68 | O | 0.70065 | 0.35678 | 0.40092 | 0.01267 | Uiso | 1 | -0.491718 |
| O69 | O | 0.78039 | 0.67072 | 0.5665  | 0.01267 | Uiso | 1 | -0.524622 |
| O70 | O | 0.94744 | 0.68094 | 0.59098 | 0.01267 | Uiso | 1 | -0.515314 |
| O71 | O | 0.75201 | 0.8408  | 0.19078 | 0.01267 | Uiso | 1 | -0.476968 |
| O72 | O | 0.93549 | 0.8295  | 0.15672 | 0.01267 | Uiso | 1 | -0.551935 |
| O73 | O | 0.10983 | 0.24328 | 0.36086 | 0.01267 | Uiso | 1 | -0.537506 |
| O74 | O | 0.32221 | 0.2073  | 0.35988 | 0.01267 | Uiso | 1 | -0.484509 |
| O75 | O | 0.07081 | 0.78346 | 0.57112 | 0.01267 | Uiso | 1 | -0.496215 |
| O76 | O | 0.26537 | 0.8056  | 0.57006 | 0.01267 | Uiso | 1 | -0.497025 |

```

data_CAYYEG_clean
_audit_creation_date      2014-07-02
_audit_creation_method    'Materials Studio'
_symmetry_space_group_name_H-M  'P1'
_symmetry_Int_Tables_number  1
_symmetry_cell_setting    triclinic
loop_
_symmetry_equiv_pos_as_xyz
  x,y,z
_cell_length_a            9.3307
_cell_length_b            19.4814
_cell_length_c            19.4814
_cell_angle_alpha         62.4988
_cell_angle_beta          80.8133
_cell_angle_gamma         99.1867
loop_
_atom_site_label
_atom_site_type_symbol
_atom_site_fract_x
_atom_site_fract_y
_atom_site_fract_z
_atom_site_U_iso_or_equiv
_atom_site_adp_type
_atom_site_occupancy
_atom_site_charge
Mn1  Mn    0    0    0.5  0.01267    Uiso  1    0.507349
H1   H     0.5243 0.7768 0.5794 0.01267    Uiso  1    0.132861
H2   H     0.4359 0.8523 0.6417 0.01267    Uiso  1    0.128157
H3   H     0.3035 0.8833 0.3532 0.01267    Uiso  1    0.133353
H4   H     0.0441 0.797  0.4031 0.01267    Uiso  1    0.129026
H5   H     0.6092 0.9911 0.4193 0.01267    Uiso  1    0.122985
H6   H     0.8226 0.9962 0.3407 0.01267    Uiso  1    0.078303
H7   H     0.6518 0.0511 0.1619 0.01267    Uiso  1    0.086535
H8   H     0.4254 0.0453 0.235  0.01267    Uiso  1    0.130652
H9   H     0.8373 0.6877 0.5764 0.01267    Uiso  1    0.136738
H10  H     0.7345 0.5739 0.5745 0.01267    Uiso  1    0.097336
H11  H     0.5582 0.6936 0.4038 0.01267    Uiso  1    0.092334
H12  H     0.6548 0.811  0.4006 0.01267    Uiso  1    0.141226
H13  H     0.4757 0.2232 0.4206 0.01267    Uiso  1    0.132743
H14  H     0.5641 0.1477 0.3583 0.01267    Uiso  1    0.12798
H15  H     0.6965 0.1167 0.6468 0.01267    Uiso  1    0.133442
H16  H     0.9559 0.203  0.5969 0.01267    Uiso  1    0.128988
H17  H     0.3908 0.0089 0.5807 0.01267    Uiso  1    0.122727
H18  H     0.1774 0.0038 0.6593 0.01267    Uiso  1    0.078262
H19  H     0.3482 0.9489 0.8381 0.01267    Uiso  1    0.086745
H20  H     0.5746 0.9547 0.765  0.01267    Uiso  1    0.130616
H21  H     0.1627 0.3123 0.4236 0.01267    Uiso  1    0.136604
H22  H     0.2655 0.4261 0.4255 0.01267    Uiso  1    0.097089
H23  H     0.4418 0.3064 0.5962 0.01267    Uiso  1    0.092323
H24  H     0.3452 0.189  0.5994 0.01267    Uiso  1    0.141294
C1   C     0.26645    0.13483    0.47168    0.01267    Uiso  1    0.16927
C2   C     0.5802 0.8238 0.5742 0.01267    Uiso  1    -0.207289

```

|     |    |         |         |         |         |         |      |           |           |
|-----|----|---------|---------|---------|---------|---------|------|-----------|-----------|
| C3  | C  | 0.5313  | 0.8652  | 0.6087  | 0.01267 | Uiso    | 1    | -0.198023 |           |
| C4  | C  | 0.65554 |         | 0.93349 | 0.58447 | 0.01267 | Uiso | 1         | 0.165053  |
| C5  | C  | 0.65698 |         | 0.98975 | 0.61151 | 0.01267 | Uiso | 1         | -0.10696  |
| C6  | C  | 0.78323 |         | 0.04939 | 0.5978  | 0.01267 | Uiso | 1         | 0.164032  |
| C7  | C  | 0.2196  | 0.8892  | 0.3807  | 0.01267 | Uiso    | 1    | -0.205084 |           |
| C8  | C  | 0.0764  | 0.8415  | 0.4083  | 0.01267 | Uiso    | 1    | -0.201459 |           |
| C9  | C  | 0.98398 |         | 0.87298 | 0.44704 | 0.01267 | Uiso | 1         | 0.165137  |
| C10 | C  | 0.17117 |         | 0.1607  | 0.51309 | 0.01267 | Uiso | 1         | -0.115041 |
| C11 | C  | 0.48923 |         | 0.01658 | 0.33759 | 0.01267 | Uiso | 1         | 0.136727  |
| C12 | C  | 0.6131  | 0.0029  | 0.3669  | 0.01267 | Uiso    | 1    | -0.212754 |           |
| C13 | C  | 0.7417  | 0.0068  | 0.3189  | 0.01267 | Uiso    | 1    | 0.079216  |           |
| C14 | C  | 0.642   | 0.0383  | 0.2151  | 0.01267 | Uiso    | 1    | 0.075007  |           |
| C15 | C  | 0.5046  | 0.0352  | 0.2585  | 0.01267 | Uiso    | 1    | -0.215223 |           |
| C16 | C  | 0.24032 |         | 0.2362  | 0.51194 | 0.01267 | Uiso | 1         | 0.154056  |
| C17 | C  | 0.219   | 0.3093  | 0.4597  | 0.01267 | Uiso    | 1    | -0.205697 |           |
| C18 | C  | 0.2815  | 0.3779  | 0.4611  | 0.01267 | Uiso    | 1    | 0.073895  |           |
| C19 | C  | 0.6156  | 0.6925  | 0.439   | 0.01267 | Uiso    | 1    | 0.0847    |           |
| C20 | C  | 0.6736  | 0.7638  | 0.4365  | 0.01267 | Uiso    | 1    | -0.187399 |           |
| C21 | C  | 0.73355 |         | 0.86517 | 0.52832 | 0.01267 | Uiso | 1         | 0.169389  |
| C22 | C  | 0.4198  | 0.1762  | 0.4258  | 0.01267 | Uiso    | 1    | -0.207244 |           |
| C23 | C  | 0.4687  | 0.1348  | 0.3913  | 0.01267 | Uiso    | 1    | -0.198114 |           |
| C24 | C  | 0.34446 |         | 0.06651 | 0.41553 | 0.01267 | Uiso | 1         | 0.165146  |
| C25 | C  | 0.34302 |         | 0.01025 | 0.38849 | 0.01267 | Uiso | 1         | -0.107035 |
| C26 | C  | 0.21677 |         | 0.95061 | 0.4022  | 0.01267 | Uiso | 1         | 0.164116  |
| C27 | C  | 0.7804  | 0.1108  | 0.6193  | 0.01267 | Uiso    | 1    | -0.205036 |           |
| C28 | C  | 0.9236  | 0.1585  | 0.5917  | 0.01267 | Uiso    | 1    | -0.201519 |           |
| C29 | C  | 0.01602 |         | 0.12702 | 0.55296 | 0.01267 | Uiso | 1         | 0.165109  |
| C30 | C  | 0.82883 |         | 0.8393  | 0.48691 | 0.01267 | Uiso | 1         | -0.114942 |
| C31 | C  | 0.51077 |         | 0.98342 | 0.66241 | 0.01267 | Uiso | 1         | 0.136536  |
| C32 | C  | 0.3869  | 0.9971  | 0.6331  | 0.01267 | Uiso    | 1    | -0.212566 |           |
| C33 | C  | 0.2583  | 0.9932  | 0.6811  | 0.01267 | Uiso    | 1    | 0.079018  |           |
| C34 | C  | 0.358   | 0.9617  | 0.7849  | 0.01267 | Uiso    | 1    | 0.074906  |           |
| C35 | C  | 0.4954  | 0.9648  | 0.7415  | 0.01267 | Uiso    | 1    | -0.215069 |           |
| C36 | C  | 0.75968 |         | 0.7638  | 0.48806 | 0.01267 | Uiso | 1         | 0.153823  |
| C37 | C  | 0.781   | 0.6907  | 0.5403  | 0.01267 | Uiso    | 1    | -0.205532 |           |
| C38 | C  | 0.7185  | 0.6221  | 0.5389  | 0.01267 | Uiso    | 1    | 0.073685  |           |
| C39 | C  | 0.3844  | 0.3075  | 0.561   | 0.01267 | Uiso    | 1    | 0.084825  |           |
| C40 | C  | 0.3264  | 0.2362  | 0.5635  | 0.01267 | Uiso    | 1    | -0.187341 |           |
| N1  | N  | 0.22436 |         | 0.0672  | 0.46552 | 0.01267 | Uiso | 1         | -0.320365 |
| N2  | N  | 0.9276  | 0.05994 |         | 0.55894 | 0.01267 | Uiso | 1         | -0.315274 |
| N3  | N  | 0.7583  | 0.0245  | 0.2439  | 0.01267 | Uiso    | 1    | -0.269697 |           |
| N4  | N  | 0.36327 |         | 0.37752 | 0.51151 | 0.01267 | Uiso | 1         | -0.163758 |
| N5  | N  | 0.77564 |         | 0.9328  | 0.53448 | 0.01267 | Uiso | 1         | -0.32066  |
| N6  | N  | 0.0724  | 0.94006 |         | 0.44106 | 0.01267 | Uiso | 1         | -0.315453 |
| N7  | N  | 0.2417  | 0.9755  | 0.7561  | 0.01267 | Uiso    | 1    | -0.26932  |           |
| N8  | N  | 0.63673 |         | 0.62248 | 0.48849 | 0.01267 | Uiso | 1         | -0.163639 |
| Mn2 | Mn | 0.5     | 0.5     | 0.5     | 0.01267 | Uiso    | 1    | 0.501155  |           |
| H25 | H  | 0.1037  | 0.5794  | 0.6438  | 0.01267 | Uiso    | 1    | 0.133465  |           |
| H26 | H  | 0.0776  | 0.6417  | 0.506   | 0.01267 | Uiso    | 1    | 0.130063  |           |
| H27 | H  | 0.6567  | 0.3532  | 0.7635  | 0.01267 | Uiso    | 1    | 0.130203  |           |
| H28 | H  | 0.4472  | 0.4031  | 0.7999  | 0.01267 | Uiso    | 1    | 0.128944  |           |
| H29 | H  | 0.0285  | 0.4193  | 0.5896  | 0.01267 | Uiso    | 1    | 0.122305  |           |

|     |   |         |        |         |         |         |      |           |           |
|-----|---|---------|--------|---------|---------|---------|------|-----------|-----------|
| H30 | H | 0.1633  | 0.3407 | 0.6631  | 0.01267 | Uiso    | 1    | 0.080367  |           |
| H31 | H | 0.8137  | 0.1619 | 0.787   | 0.01267 | Uiso    | 1    | 0.085713  |           |
| H32 | H | 0.6604  | 0.235  | 0.7197  | 0.01267 | Uiso    | 1    | 0.130165  |           |
| H33 | H | 0.4137  | 0.5764 | 0.7359  | 0.01267 | Uiso    | 1    | 0.13641   |           |
| H34 | H | 0.309   | 0.5745 | 0.8516  | 0.01267 | Uiso    | 1    | 0.095519  |           |
| H35 | H | 0.962   | 0.4038 | 0.9026  | 0.01267 | Uiso    | 1    | 0.091805  |           |
| H36 | H | 0.0554  | 0.4006 | 0.7884  | 0.01267 | Uiso    | 1    | 0.139121  |           |
| H37 | H | 0.8963  | 0.4206 | 0.3562  | 0.01267 | Uiso    | 1    | 0.133306  |           |
| H38 | H | 0.9224  | 0.3583 | 0.494   | 0.01267 | Uiso    | 1    | 0.13015   |           |
| H39 | H | 0.3433  | 0.6468 | 0.2365  | 0.01267 | Uiso    | 1    | 0.130124  |           |
| H40 | H | 0.5528  | 0.5969 | 0.2001  | 0.01267 | Uiso    | 1    | 0.128704  |           |
| H41 | H | 0.9715  | 0.5807 | 0.4104  | 0.01267 | Uiso    | 1    | 0.122472  |           |
| H42 | H | 0.8367  | 0.6593 | 0.3369  | 0.01267 | Uiso    | 1    | 0.080515  |           |
| H43 | H | 0.1863  | 0.8381 | 0.213   | 0.01267 | Uiso    | 1    | 0.0856    |           |
| H44 | H | 0.3396  | 0.765  | 0.2803  | 0.01267 | Uiso    | 1    | 0.13008   |           |
| H45 | H | 0.5863  | 0.4236 | 0.2641  | 0.01267 | Uiso    | 1    | 0.136617  |           |
| H46 | H | 0.691   | 0.4255 | 0.1484  | 0.01267 | Uiso    | 1    | 0.095679  |           |
| H47 | H | 0.038   | 0.5962 | 0.0974  | 0.01267 | Uiso    | 1    | 0.091658  |           |
| H48 | H | 0.9446  | 0.5994 | 0.2116  | 0.01267 | Uiso    | 1    | 0.139058  |           |
| C41 | C | 0.73813 |        | 0.47168 | 0.39349 | 0.01267 | Uiso | 1         | 0.162758  |
| C42 | C | 0.1544  | 0.5742 | 0.602   | 0.01267 | Uiso    | 1    | -0.207053 |           |
| C43 | C | 0.14    | 0.6087 | 0.5261  | 0.01267 | Uiso    | 1    | -0.202588 |           |
| C44 | C | 0.24001 |        | 0.58447 | 0.48204 | 0.01267 | Uiso | 1         | 0.168412  |
| C45 | C | 0.26849 |        | 0.61151 | 0.39874 | 0.01267 | Uiso | 1         | -0.110783 |
| C46 | C | 0.38103 |        | 0.5978  | 0.35281 | 0.01267 | Uiso | 1         | 0.167369  |
| C47 | C | 0.6003  | 0.3807 | 0.7301  | 0.01267 | Uiso    | 1    | -0.203449 |           |
| C48 | C | 0.4847  | 0.4083 | 0.7502  | 0.01267 | Uiso    | 1    | -0.200451 |           |
| C49 | C | 0.43102 |        | 0.44704 | 0.67998 | 0.01267 | Uiso | 1         | 0.162973  |
| C50 | C | 0.68426 |        | 0.51309 | 0.32621 | 0.01267 | Uiso | 1         | -0.111867 |
| C51 | C | 0.82682 |        | 0.33759 | 0.64583 | 0.01267 | Uiso | 1         | 0.134085  |
| C52 | C | 0.98    | 0.3669 | 0.6302  | 0.01267 | Uiso    | 1    | -0.208398 |           |
| C53 | C | 0.0606  | 0.3189 | 0.6743  | 0.01267 | Uiso    | 1    | 0.074832  |           |
| C54 | C | 0.8571  | 0.2151 | 0.7466  | 0.01267 | Uiso    | 1    | 0.079477  |           |
| C55 | C | 0.7631  | 0.2585 | 0.7063  | 0.01267 | Uiso    | 1    | -0.215783 |           |
| C56 | C | 0.75226 |        | 0.51194 | 0.25186 | 0.01267 | Uiso | 1         | 0.154374  |
| C57 | C | 0.6787  | 0.4597 | 0.231   | 0.01267 | Uiso    | 1    | -0.20511  |           |
| C58 | C | 0.7426  | 0.4611 | 0.161   | 0.01267 | Uiso    | 1    | 0.075109  |           |
| C59 | C | 0.0546  | 0.439  | 0.8685  | 0.01267 | Uiso    | 1    | 0.087274  |           |
| C60 | C | 0.1101  | 0.4365 | 0.7997  | 0.01267 | Uiso    | 1    | -0.185922 |           |
| C61 | C | 0.26187 |        | 0.52832 | 0.60651 | 0.01267 | Uiso | 1         | 0.162854  |
| C62 | C | 0.8456  | 0.4258 | 0.398   | 0.01267 | Uiso    | 1    | -0.207097 |           |
| C63 | C | 0.86    | 0.3913 | 0.4739  | 0.01267 | Uiso    | 1    | -0.202607 |           |
| C64 | C | 0.75999 |        | 0.41553 | 0.51796 | 0.01267 | Uiso | 1         | 0.168433  |
| C65 | C | 0.73151 |        | 0.38849 | 0.60126 | 0.01267 | Uiso | 1         | -0.110644 |
| C66 | C | 0.61897 |        | 0.4022  | 0.64719 | 0.01267 | Uiso | 1         | 0.167434  |
| C67 | C | 0.3997  | 0.6193 | 0.2699  | 0.01267 | Uiso    | 1    | -0.203434 |           |
| C68 | C | 0.5153  | 0.5917 | 0.2498  | 0.01267 | Uiso    | 1    | -0.200407 |           |
| C69 | C | 0.56898 |        | 0.55296 | 0.32002 | 0.01267 | Uiso | 1         | 0.162864  |
| C70 | C | 0.31574 |        | 0.48691 | 0.67379 | 0.01267 | Uiso | 1         | -0.112006 |
| C71 | C | 0.17318 |        | 0.66241 | 0.35417 | 0.01267 | Uiso | 1         | 0.134411  |
| C72 | C | 0.02    | 0.6331 | 0.3698  | 0.01267 | Uiso    | 1    | -0.208481 |           |
| C73 | C | 0.9394  | 0.6811 | 0.3257  | 0.01267 | Uiso    | 1    | 0.07489   |           |

|     |    |         |         |         |         |         |      |           |           |
|-----|----|---------|---------|---------|---------|---------|------|-----------|-----------|
| C74 | C  | 0.1429  | 0.7849  | 0.2534  | 0.01267 | Uiso    | 1    | 0.079269  |           |
| C75 | C  | 0.2369  | 0.7415  | 0.2937  | 0.01267 | Uiso    | 1    | -0.215996 |           |
| C76 | C  | 0.24774 |         | 0.48806 | 0.74814 | 0.01267 | Uiso | 1         | 0.154415  |
| C77 | C  | 0.3213  | 0.5403  | 0.769   | 0.01267 | Uiso    | 1    | -0.205144 |           |
| C78 | C  | 0.2574  | 0.5389  | 0.839   | 0.01267 | Uiso    | 1    | 0.075023  |           |
| C79 | C  | 0.9454  | 0.561   | 0.1315  | 0.01267 | Uiso    | 1    | 0.087298  |           |
| C80 | C  | 0.8899  | 0.5635  | 0.2003  | 0.01267 | Uiso    | 1    | -0.185905 |           |
| N9  | N  | 0.68988 |         | 0.46552 | 0.46728 | 0.01267 | Uiso | 1         | -0.316787 |
| N10 | N  | 0.48654 |         | 0.55894 | 0.38112 | 0.01267 | Uiso | 1         | -0.31521  |
| N11 | N  | 0.0022  | 0.2439  | 0.7316  | 0.01267 | Uiso    | 1    | -0.271912 |           |
| N12 | N  | 0.87478 |         | 0.51151 | 0.11097 | 0.01267 | Uiso | 1         | -0.16565  |
| N13 | N  | 0.31012 |         | 0.53448 | 0.53272 | 0.01267 | Uiso | 1         | -0.316904 |
| N14 | N  | 0.51346 |         | 0.44106 | 0.61888 | 0.01267 | Uiso | 1         | -0.315321 |
| N15 | N  | 0.9978  | 0.7561  | 0.2684  | 0.01267 | Uiso    | 1    | -0.271936 |           |
| N16 | N  | 0.12522 |         | 0.48849 | 0.88903 | 0.01267 | Uiso | 1         | -0.165192 |
| Mn3 | Mn | 0       | 0.5     | 0       | 0.01267 | Uiso    | 1    | 0.503496  |           |
| H49 | H  | 0.7475  | 0.6438  | 0.7768  | 0.01267 | Uiso    | 1    | 0.132666  |           |
| H50 | H  | 0.5836  | 0.506   | 0.8523  | 0.01267 | Uiso    | 1    | 0.127436  |           |
| H51 | H  | 0.4202  | 0.7635  | 0.8833  | 0.01267 | Uiso    | 1    | 0.131732  |           |
| H52 | H  | 0.2471  | 0.7999  | 0.797   | 0.01267 | Uiso    | 1    | 0.129487  |           |
| H53 | H  | 0.6181  | 0.5896  | 0.9911  | 0.01267 | Uiso    | 1    | 0.122854  |           |
| H54 | H  | 0.8264  | 0.6631  | 0.9962  | 0.01267 | Uiso    | 1    | 0.078479  |           |
| H55 | H  | 0.6007  | 0.787   | 0.0511  | 0.01267 | Uiso    | 1    | 0.086195  |           |
| H56 | H  | 0.3801  | 0.7197  | 0.0453  | 0.01267 | Uiso    | 1    | 0.129678  |           |
| H57 | H  | 0.1496  | 0.7359  | 0.6877  | 0.01267 | Uiso    | 1    | 0.134793  |           |
| H58 | H  | 0.1606  | 0.8516  | 0.5739  | 0.01267 | Uiso    | 1    | 0.094569  |           |
| H59 | H  | 0.8646  | 0.9026  | 0.6936  | 0.01267 | Uiso    | 1    | 0.09201   |           |
| H60 | H  | 0.8438  | 0.7884  | 0.811   | 0.01267 | Uiso    | 1    | 0.140173  |           |
| H61 | H  | 0.2525  | 0.3562  | 0.2232  | 0.01267 | Uiso    | 1    | 0.13281   |           |
| H62 | H  | 0.4164  | 0.494   | 0.1477  | 0.01267 | Uiso    | 1    | 0.127483  |           |
| H63 | H  | 0.5798  | 0.2365  | 0.1167  | 0.01267 | Uiso    | 1    | 0.131828  |           |
| H64 | H  | 0.7529  | 0.2001  | 0.203   | 0.01267 | Uiso    | 1    | 0.12957   |           |
| H65 | H  | 0.3819  | 0.4104  | 0.0089  | 0.01267 | Uiso    | 1    | 0.122824  |           |
| H66 | H  | 0.1736  | 0.3369  | 0.0038  | 0.01267 | Uiso    | 1    | 0.078514  |           |
| H67 | H  | 0.3993  | 0.213   | 0.9489  | 0.01267 | Uiso    | 1    | 0.086211  |           |
| H68 | H  | 0.6199  | 0.2803  | 0.9547  | 0.01267 | Uiso    | 1    | 0.129672  |           |
| H69 | H  | 0.8504  | 0.2641  | 0.3123  | 0.01267 | Uiso    | 1    | 0.134831  |           |
| H70 | H  | 0.8394  | 0.1484  | 0.4261  | 0.01267 | Uiso    | 1    | 0.094815  |           |
| H71 | H  | 0.1354  | 0.0974  | 0.3064  | 0.01267 | Uiso    | 1    | 0.092099  |           |
| H72 | H  | 0.1562  | 0.2116  | 0.189   | 0.01267 | Uiso    | 1    | 0.139975  |           |
| C81 | C  | 0.13162 |         | 0.39349 | 0.13483 | 0.01267 | Uiso | 1         | 0.16528   |
| C82 | C  | 0.7564  | 0.602   | 0.8238  | 0.01267 | Uiso    | 1    | -0.207906 |           |
| C83 | C  | 0.6661  | 0.5261  | 0.8652  | 0.01267 | Uiso    | 1    | -0.199934 |           |
| C84 | C  | 0.72205 |         | 0.48204 | 0.93349 | 0.01267 | Uiso | 1         | 0.168519  |
| C85 | C  | 0.66723 |         | 0.39874 | 0.98975 | 0.01267 | Uiso | 1         | -0.111868 |
| C86 | C  | 0.73384 |         | 0.35281 | 0.04939 | 0.01267 | Uiso | 1         | 0.167435  |
| C87 | C  | 0.3304  | 0.7301  | 0.8892  | 0.01267 | Uiso    | 1    | -0.205541 |           |
| C88 | C  | 0.2349  | 0.7502  | 0.8415  | 0.01267 | Uiso    | 1    | -0.20173  |           |
| C89 | C  | 0.111   | 0.67998 |         | 0.87298 | 0.01267 | Uiso | 1         | 0.16282   |
| C90 | C  | 0.01047 |         | 0.32621 | 0.1607  | 0.01267 | Uiso | 1         | -0.111029 |
| C91 | C  | 0.47265 |         | 0.64583 | 0.01658 | 0.01267 | Uiso | 1         | 0.135133  |
| C92 | C  | 0.6102  | 0.6302  | 0.0029  | 0.01267 | Uiso    | 1    | -0.208695 |           |

|      |   |         |         |         |         |      |   |           |  |
|------|---|---------|---------|---------|---------|------|---|-----------|--|
| C93  | C | 0.7349  | 0.6743  | 0.0068  | 0.01267 | Uiso | 1 | 0.076297  |  |
| C94  | C | 0.6037  | 0.7466  | 0.0383  | 0.01267 | Uiso | 1 | 0.076294  |  |
| C95  | C | 0.4694  | 0.7063  | 0.0352  | 0.01267 | Uiso | 1 | -0.214232 |  |
| C96  | C | 0.00412 | 0.25186 | 0.2362  | 0.01267 | Uiso | 1 | 0.151902  |  |
| C97  | C | 0.9097  | 0.231   | 0.3093  | 0.01267 | Uiso | 1 | -0.203629 |  |
| C98  | C | 0.9036  | 0.161   | 0.3779  | 0.01267 | Uiso | 1 | 0.076828  |  |
| C99  | C | 0.9231  | 0.8685  | 0.6925  | 0.01267 | Uiso | 1 | 0.087265  |  |
| C100 | C | 0.9098  | 0.7997  | 0.7638  | 0.01267 | Uiso | 1 | -0.186989 |  |
| C101 | C | 0.86838 | 0.60651 | 0.86517 | 0.01267 | Uiso | 1 | 0.165227  |  |
| C102 | C | 0.2436  | 0.398   | 0.1762  | 0.01267 | Uiso | 1 | -0.207702 |  |
| C103 | C | 0.3339  | 0.4739  | 0.1348  | 0.01267 | Uiso | 1 | -0.200061 |  |
| C104 | C | 0.27795 | 0.51796 | 0.06651 | 0.01267 | Uiso | 1 | 0.168365  |  |
| C105 | C | 0.33277 | 0.60126 | 0.01025 | 0.01267 | Uiso | 1 | -0.111788 |  |
| C106 | C | 0.26616 | 0.64719 | 0.95061 | 0.01267 | Uiso | 1 | 0.167403  |  |
| C107 | C | 0.6696  | 0.2699  | 0.1108  | 0.01267 | Uiso | 1 | -0.20551  |  |
| C108 | C | 0.7651  | 0.2498  | 0.1585  | 0.01267 | Uiso | 1 | -0.201555 |  |
| C109 | C | 0.889   | 0.32002 | 0.12702 | 0.01267 | Uiso | 1 | 0.162805  |  |
| C110 | C | 0.98953 | 0.67379 | 0.8393  | 0.01267 | Uiso | 1 | -0.110915 |  |
| C111 | C | 0.52735 | 0.35417 | 0.98342 | 0.01267 | Uiso | 1 | 0.135272  |  |
| C112 | C | 0.3898  | 0.3698  | 0.9971  | 0.01267 | Uiso | 1 | -0.208625 |  |
| C113 | C | 0.2651  | 0.3257  | 0.9932  | 0.01267 | Uiso | 1 | 0.076298  |  |
| C114 | C | 0.3963  | 0.2534  | 0.9617  | 0.01267 | Uiso | 1 | 0.076261  |  |
| C115 | C | 0.5306  | 0.2937  | 0.9648  | 0.01267 | Uiso | 1 | -0.214443 |  |
| C116 | C | 0.99588 | 0.74814 | 0.7638  | 0.01267 | Uiso | 1 | 0.151677  |  |
| C117 | C | 0.0903  | 0.769   | 0.6907  | 0.01267 | Uiso | 1 | -0.203499 |  |
| C118 | C | 0.0964  | 0.839   | 0.6221  | 0.01267 | Uiso | 1 | 0.076793  |  |
| C119 | C | 0.0769  | 0.1315  | 0.3075  | 0.01267 | Uiso | 1 | 0.086977  |  |
| C120 | C | 0.0902  | 0.2003  | 0.2362  | 0.01267 | Uiso | 1 | -0.187128 |  |
| N17  | N | 0.15716 | 0.46728 | 0.0672  | 0.01267 | Uiso | 1 | -0.318322 |  |
| N18  | N | 0.86766 | 0.38112 | 0.05994 | 0.01267 | Uiso | 1 | -0.31494  |  |
| N19  | N | 0.7338  | 0.7316  | 0.0245  | 0.01267 | Uiso | 1 | -0.271161 |  |
| N20  | N | 0.98575 | 0.11097 | 0.37752 | 0.01267 | Uiso | 1 | -0.170109 |  |
| N21  | N | 0.84284 | 0.53272 | 0.9328  | 0.01267 | Uiso | 1 | -0.318194 |  |
| N22  | N | 0.13234 | 0.61888 | 0.94006 | 0.01267 | Uiso | 1 | -0.314678 |  |
| N23  | N | 0.2662  | 0.2684  | 0.9755  | 0.01267 | Uiso | 1 | -0.271049 |  |
| N24  | N | 0.01425 | 0.88903 | 0.62248 | 0.01267 | Uiso | 1 | -0.170355 |  |

data\_image0 LONWIW\_clean

\_cell\_length\_a 13.6132  
\_cell\_length\_b 18.0261  
\_cell\_length\_c 22.945  
\_cell\_angle\_alpha 69.574  
\_cell\_angle\_beta 88.899  
\_cell\_angle\_gamma 89.147

\_symmetry\_space\_group\_name\_H-M "P 1"  
\_symmetry\_int\_tables\_number 1

loop\_

\_symmetry\_equiv\_pos\_as\_xyz  
'x, y, z'

loop\_

\_atom\_site\_label  
\_atom\_site\_occupancy  
\_atom\_site\_fract\_x  
\_atom\_site\_fract\_y  
\_atom\_site\_fract\_z  
\_atom\_site\_thermal\_displace\_type  
\_atom\_site\_B\_iso\_or\_equiv  
\_atom\_site\_type\_symbol  
\_atom\_site\_charge

|     |   |         |         |         |      |   |    |           |
|-----|---|---------|---------|---------|------|---|----|-----------|
| Mg1 | 1 | 0.91179 | 0.79426 | 0.39759 | Biso | 1 | Mg | 1.542641  |
| Mg2 | 1 | 0.12418 | 0.86681 | 0.25039 | Biso | 1 | Mg | 1.509325  |
| Mg3 | 1 | 0.34246 | 0.94376 | 0.10503 | Biso | 1 | Mg | 1.551302  |
| Mg4 | 1 | 0.60702 | 0.69053 | 0.6117  | Biso | 1 | Mg | 1.543091  |
| Mg5 | 1 | 0.37601 | 0.63236 | 0.75093 | Biso | 1 | Mg | 1.513156  |
| Mg6 | 1 | 0.1478  | 0.56977 | 0.89026 | Biso | 1 | Mg | 1.563899  |
| O1  | 1 | 0.04652 | 0.83785 | 0.40443 | Biso | 1 | O  | -0.740734 |
| O2  | 1 | 0.16576 | 0.824   | 0.34109 | Biso | 1 | O  | -0.639733 |
| O3  | 1 | 0.47113 | 0.65929 | 0.59352 | Biso | 1 | O  | -0.751705 |
| O4  | 1 | 0.34944 | 0.66705 | 0.65819 | Biso | 1 | O  | -0.64395  |
| O5  | 1 | 0.34043 | 0.78134 | 0.38177 | Biso | 1 | O  | -0.495195 |
| H1  | 1 | 0.297   | 0.794   | 0.3574  | Biso | 1 | H  | 0.398129  |
| O6  | 1 | 0.17636 | 0.71824 | 0.61661 | Biso | 1 | O  | -0.52258  |
| H2  | 1 | 0.218   | 0.701   | 0.6403  | Biso | 1 | H  | 0.425465  |
| O7  | 1 | 0.87627 | 0.89513 | 0.32491 | Biso | 1 | O  | -0.748537 |
| O8  | 1 | 0.00373 | 0.93261 | 0.25854 | Biso | 1 | O  | -0.650575 |
| O9  | 1 | 0.73573 | 0.29041 | 0.25039 | Biso | 1 | O  | -0.657846 |
| O10 | 1 | 0.86149 | 0.32613 | 0.18231 | Biso | 1 | O  | -0.758181 |
| O11 | 1 | 0.02405 | 0.07798 | 0.18795 | Biso | 1 | O  | -0.478824 |
| H3  | 1 | 0.04    | 0.03    | 0.2075  | Biso | 1 | H  | 0.371659  |
| O12 | 1 | 0.7129  | 0.1429  | 0.32063 | Biso | 1 | O  | -0.493737 |
| H4  | 1 | 0.709   | 0.189   | 0.3048  | Biso | 1 | H  | 0.397928  |
| O13 | 1 | 0.04662 | 0.26899 | 0.65676 | Biso | 1 | O  | -0.758838 |
| O14 | 1 | 0.95731 | 0.22905 | 0.74459 | Biso | 1 | O  | -0.650346 |
| O15 | 1 | 0.28694 | 0.54039 | 0.75617 | Biso | 1 | O  | -0.646027 |
| O16 | 1 | 0.20119 | 0.49857 | 0.84501 | Biso | 1 | O  | -0.758469 |
| O17 | 1 | 0.98612 | 0.28631 | 0.83088 | Biso | 1 | O  | -0.460532 |

|     |   |         |         |         |         |         |      |          |           |           |
|-----|---|---------|---------|---------|---------|---------|------|----------|-----------|-----------|
| H5  | 1 | 0.96    | 0.26    | 0.8084  | Biso    | 1       | H    | 0.367683 |           |           |
| O18 | 1 | 0.25608 |         | 0.4845  | 0.66927 | Biso    | 1    | O        | -0.473845 |           |
| H6  | 1 | 0.285   | 0.509   | 0.6899  | Biso    | 1       | H    | 0.37512  |           |           |
| O19 | 1 | 0.2034  | 0.96385 |         | 0.24678 | Biso    | 1    | O        | -0.651228 |           |
| O20 | 1 | 0.29271 |         | 0.00416 |         | 0.15906 | Biso | 1        | O         | -0.761835 |
| O21 | 1 | 0.44662 |         | 0.23482 |         | 0.34564 | Biso | 1        | O         | -0.753315 |
| O22 | 1 | 0.53339 |         | 0.27508 |         | 0.25702 | Biso | 1        | O         | -0.643549 |
| O23 | 1 | 0.2346  | 0.02026 |         | 0.33341 |         | Biso | 1        | O         | -0.473066 |
| H7  | 1 | 0.202   | 0.992   | 0.3139  | Biso    | 1       | H    | 0.373866 |           |           |
| O24 | 1 | 0.50393 |         | 0.2182  | 0.17107 |         | Biso | 1        | O         | -0.468435 |
| H8  | 1 | 0.529   | 0.245   | 0.1928  | Biso    | 1       | H    | 0.379093 |           |           |
| O25 | 1 | 0.08769 |         | 0.90934 |         | 0.15855 | Biso | 1        | O         | -0.643682 |
| O26 | 1 | 0.20919 |         | 0.90326 |         | 0.0934  | Biso | 1        | O         | -0.740713 |
| O27 | 1 | 0.91288 |         | 0.9518  | 0.11718 |         | Biso | 1        | O         | -0.524983 |
| H9  | 1 | 0.956   | 0.94    | 0.1399  | Biso    | 1       | H    | 0.42906  |           |           |
| O28 | 1 | 0.40439 |         | 0.59985 |         | 0.84375 | Biso | 1        | O         | -0.646514 |
| O29 | 1 | 0.28449 |         | 0.59627 |         | 0.91262 | Biso | 1        | O         | -0.753101 |
| O30 | 1 | 0.58054 |         | 0.54862 |         | 0.88105 | Biso | 1        | O         | -0.537516 |
| H10 | 1 | 0.538   | 0.558   | 0.8597  | Biso    | 1       | H    | 0.427985 |           |           |
| O31 | 1 | 0.62238 |         | 0.59361 |         | 0.69141 | Biso | 1        | O         | -0.751745 |
| O32 | 1 | 0.48919 |         | 0.55634 |         | 0.75274 | Biso | 1        | O         | -0.655626 |
| O33 | 1 | 0.75748 |         | 0.19871 |         | 0.7609  | Biso | 1        | O         | -0.651092 |
| O34 | 1 | 0.6266  | 0.16116 |         | 0.82458 |         | Biso | 1        | O         | -0.74917  |
| O35 | 1 | 0.46302 |         | 0.40883 |         | 0.82098 | Biso | 1        | O         | -0.470851 |
| H11 | 1 | 0.443   | 0.457   | 0.7989  | Biso    | 1       | H    | 0.366688 |           |           |
| O36 | 1 | 0.79035 |         | 0.34728 |         | 0.69968 | Biso | 1        | O         | -0.476845 |
| H12 | 1 | 0.797   | 0.298   | 0.7138  | Biso    | 1       | H    | 0.372932 |           |           |
| C1  | 1 | 0.1316  | 0.81798 |         | 0.39432 |         | Biso | 1        | C         | 0.664423  |
| C2  | 1 | 0.1991  | 0.78379 |         | 0.44765 |         | Biso | 1        | C         | -0.160636 |
| C3  | 1 | 0.2978  | 0.76704 |         | 0.43914 |         | Biso | 1        | C         | 0.311149  |
| C4  | 1 | 0.3553  | 0.7327  | 0.49104 |         |         | Biso | 1        | C         | -0.227561 |
| H13 | 1 | 0.4209  | 0.7211  | 0.4854  | Biso    | 1       | H    | 0.136023 |           |           |
| C5  | 1 | 0.3181  | 0.71508 |         | 0.55132 |         | Biso | 1        | C         | -0.157007 |
| C6  | 1 | 0.2194  | 0.73302 |         | 0.55966 |         | Biso | 1        | C         | 0.31462   |
| C7  | 1 | 0.1617  | 0.76738 |         | 0.50791 |         | Biso | 1        | C         | -0.237722 |
| H14 | 1 | 0.0964  | 0.7798  | 0.5134  | Biso    | 1       | H    | 0.131326 |           |           |
| C8  | 1 | 0.385   | 0.67774 |         | 0.60466 |         | Biso | 1        | C         | 0.674747  |
| C9  | 1 | 0.928   | 0.9463  | 0.28545 |         |         | Biso | 1        | C         | 0.684244  |
| C10 | 1 | 0.8981  | 0.03165 |         | 0.26846 |         | Biso | 1        | C         | -0.159985 |
| C11 | 1 | 0.9468  | 0.092   | 0.22148 |         |         | Biso | 1        | C         | 0.301271  |
| C12 | 1 | 0.917   | 0.1698  | 0.20819 |         |         | Biso | 1        | C         | -0.224976 |
| H15 | 1 | 0.9499  | 0.2097  | 0.1771  | Biso    | 1       | H    | 0.141475 |           |           |
| C13 | 1 | 0.8394  | 0.18995 |         | 0.24004 |         | Biso | 1        | C         | -0.163032 |
| C14 | 1 | 0.7901  | 0.1297  | 0.28733 |         |         | Biso | 1        | C         | 0.298816  |
| C15 | 1 | 0.8212  | 0.0521  | 0.30092 |         |         | Biso | 1        | C         | -0.225451 |
| H16 | 1 | 0.7897  | 0.0123  | 0.3328  | Biso    | 1       | H    | 0.141356 |           |           |
| C16 | 1 | 0.8106  | 0.2759  | 0.22252 |         |         | Biso | 1        | C         | 0.687051  |
| C17 | 1 | 0.0222  | 0.27236 |         | 0.7085  |         | Biso | 1        | C         | 0.686461  |
| C18 | 1 | 0.0719  | 0.33058 |         | 0.73064 |         | Biso | 1        | C         | -0.158422 |
| C19 | 1 | 0.0527  | 0.3339  | 0.78995 |         |         | Biso | 1        | C         | 0.29433   |
| C20 | 1 | 0.104   | 0.3879  | 0.80892 |         |         | Biso | 1        | C         | -0.227022 |
| H17 | 1 | 0.0926  | 0.3894  | 0.8486  | Biso    | 1       | H    | 0.13384  |           |           |

|      |   |         |         |         |      |   |    |           |
|------|---|---------|---------|---------|------|---|----|-----------|
| C21  | 1 | 0.1719  | 0.43938 | 0.76985 | Biso | 1 | C  | -0.161743 |
| C22  | 1 | 0.1906  | 0.43605 | 0.71044 | Biso | 1 | C  | 0.298703  |
| C23  | 1 | 0.1395  | 0.3832  | 0.69163 | Biso | 1 | C  | -0.230195 |
| H18  | 1 | 0.1502  | 0.3826  | 0.6517  | Biso | 1 | H  | 0.135653  |
| C24  | 1 | 0.2234  | 0.49684 | 0.79253 | Biso | 1 | C  | 0.679385  |
| C25  | 1 | 0.2682  | 0.0069  | 0.21092 | Biso | 1 | C  | 0.688841  |
| C26  | 1 | 0.3186  | 0.06501 | 0.23302 | Biso | 1 | C  | -0.161743 |
| C27  | 1 | 0.3006  | 0.06847 | 0.29256 | Biso | 1 | C  | 0.303702  |
| C28  | 1 | 0.3516  | 0.12214 | 0.31084 | Biso | 1 | C  | -0.232417 |
| H19  | 1 | 0.3401  | 0.1241  | 0.3504  | Biso | 1 | H  | 0.135219  |
| C29  | 1 | 0.4199  | 0.17356 | 0.27155 | Biso | 1 | C  | -0.161122 |
| C30  | 1 | 0.4378  | 0.1706  | 0.21221 | Biso | 1 | C  | 0.294872  |
| C31  | 1 | 0.3862  | 0.1166  | 0.1938  | Biso | 1 | C  | -0.226757 |
| H20  | 1 | 0.3973  | 0.115   | 0.1541  | Biso | 1 | H  | 0.131895  |
| C32  | 1 | 0.47    | 0.23198 | 0.2937  | Biso | 1 | C  | 0.681087  |
| C33  | 1 | 0.1241  | 0.92177 | 0.10482 | Biso | 1 | C  | 0.670361  |
| C34  | 1 | 0.0583  | 0.96159 | 0.05165 | Biso | 1 | C  | -0.161052 |
| C35  | 1 | 0.9582  | 0.9749  | 0.06001 | Biso | 1 | C  | 0.311988  |
| C36  | 1 | 0.9014  | 0.01239 | 0.00875 | Biso | 1 | C  | -0.231302 |
| H21  | 1 | 0.8348  | 0.0206  | 0.0144  | Biso | 1 | H  | 0.129846  |
| C37  | 1 | 0.3705  | 0.58236 | 0.89847 | Biso | 1 | C  | 0.679412  |
| C38  | 1 | 0.4392  | 0.54091 | 0.9501  | Biso | 1 | C  | -0.156988 |
| C39  | 1 | 0.538   | 0.52572 | 0.93903 | Biso | 1 | C  | 0.31361   |
| C40  | 1 | 0.4031  | 0.51491 | 0.01105 | Biso | 1 | C  | -0.229228 |
| H22  | 1 | 0.3378  | 0.5251  | 0.0185  | Biso | 1 | H  | 0.137096  |
| C41  | 1 | 0.5684  | 0.54255 | 0.72878 | Biso | 1 | C  | 0.685797  |
| C42  | 1 | 0.5982  | 0.45715 | 0.74682 | Biso | 1 | C  | -0.157679 |
| C43  | 1 | 0.5446  | 0.3959  | 0.79027 | Biso | 1 | C  | 0.296763  |
| C44  | 1 | 0.5739  | 0.31811 | 0.80258 | Biso | 1 | C  | -0.222653 |
| H23  | 1 | 0.5382  | 0.2778  | 0.8315  | Biso | 1 | H  | 0.142175  |
| C45  | 1 | 0.6549  | 0.29833 | 0.77308 | Biso | 1 | C  | -0.158911 |
| C46  | 1 | 0.7093  | 0.3596  | 0.73049 | Biso | 1 | C  | 0.300498  |
| C47  | 1 | 0.6801  | 0.43736 | 0.71839 | Biso | 1 | C  | -0.229188 |
| H24  | 1 | 0.7166  | 0.4777  | 0.6902  | Biso | 1 | H  | 0.137279  |
| C48  | 1 | 0.6816  | 0.21272 | 0.78768 | Biso | 1 | C  | 0.681792  |
| Mg7  | 1 | 0.08821 | 0.20574 | 0.60241 | Biso | 1 | Mg | 1.543059  |
| Mg8  | 1 | 0.87582 | 0.13319 | 0.74961 | Biso | 1 | Mg | 1.509235  |
| Mg9  | 1 | 0.65754 | 0.05624 | 0.89497 | Biso | 1 | Mg | 1.551364  |
| Mg10 | 1 | 0.39298 | 0.30947 | 0.3883  | Biso | 1 | Mg | 1.543268  |
| Mg11 | 1 | 0.62399 | 0.36764 | 0.24907 | Biso | 1 | Mg | 1.513221  |
| Mg12 | 1 | 0.8522  | 0.43023 | 0.10974 | Biso | 1 | Mg | 1.563905  |
| O37  | 1 | 0.95348 | 0.16215 | 0.59557 | Biso | 1 | O  | -0.740526 |
| O38  | 1 | 0.83424 | 0.176   | 0.65891 | Biso | 1 | O  | -0.639811 |
| O39  | 1 | 0.52887 | 0.34071 | 0.40648 | Biso | 1 | O  | -0.751963 |
| O40  | 1 | 0.65056 | 0.33295 | 0.34181 | Biso | 1 | O  | -0.64384  |
| O41  | 1 | 0.65957 | 0.21866 | 0.61823 | Biso | 1 | O  | -0.495822 |
| H25  | 1 | 0.703   | 0.206   | 0.6426  | Biso | 1 | H  | 0.398545  |
| O42  | 1 | 0.82364 | 0.28176 | 0.38339 | Biso | 1 | O  | -0.522309 |
| H26  | 1 | 0.782   | 0.299   | 0.3597  | Biso | 1 | H  | 0.425269  |
| O43  | 1 | 0.12373 | 0.10487 | 0.67509 | Biso | 1 | O  | -0.748304 |
| O44  | 1 | 0.99627 | 0.06739 | 0.74146 | Biso | 1 | O  | -0.650818 |
| O45  | 1 | 0.26427 | 0.70959 | 0.74961 | Biso | 1 | O  | -0.657611 |

|     |   |         |         |         |      |   |   |           |
|-----|---|---------|---------|---------|------|---|---|-----------|
| O46 | 1 | 0.13851 | 0.67387 | 0.81769 | Biso | 1 | O | -0.758607 |
| O47 | 1 | 0.97595 | 0.92202 | 0.81205 | Biso | 1 | O | -0.479167 |
| H27 | 1 | 0.96    | 0.97    | 0.7925  | Biso | 1 | H | 0.371491  |
| O48 | 1 | 0.2871  | 0.8571  | 0.67937 | Biso | 1 | O | -0.493677 |
| H28 | 1 | 0.291   | 0.811   | 0.6952  | Biso | 1 | H | 0.398007  |
| O49 | 1 | 0.95338 | 0.73101 | 0.34324 | Biso | 1 | O | -0.758703 |
| O50 | 1 | 0.04269 | 0.77095 | 0.25541 | Biso | 1 | O | -0.650149 |
| O51 | 1 | 0.71306 | 0.45961 | 0.24383 | Biso | 1 | O | -0.64625  |
| O52 | 1 | 0.79881 | 0.50143 | 0.15499 | Biso | 1 | O | -0.758522 |
| O53 | 1 | 0.01388 | 0.71369 | 0.16912 | Biso | 1 | O | -0.460573 |
| H29 | 1 | 0.04    | 0.74    | 0.1916  | Biso | 1 | H | 0.367933  |
| O54 | 1 | 0.74392 | 0.5155  | 0.33073 | Biso | 1 | O | -0.473817 |
| H30 | 1 | 0.715   | 0.491   | 0.3101  | Biso | 1 | H | 0.374887  |
| O55 | 1 | 0.7966  | 0.03615 | 0.75322 | Biso | 1 | O | -0.650857 |
| O56 | 1 | 0.70729 | 0.99584 | 0.84094 | Biso | 1 | O | -0.761797 |
| O57 | 1 | 0.55338 | 0.76518 | 0.65436 | Biso | 1 | O | -0.753405 |
| O58 | 1 | 0.46661 | 0.72492 | 0.74298 | Biso | 1 | O | -0.643732 |
| O59 | 1 | 0.7654  | 0.97974 | 0.66659 | Biso | 1 | O | -0.473132 |
| H31 | 1 | 0.798   | 0.008   | 0.6861  | Biso | 1 | H | 0.374142  |
| O60 | 1 | 0.49607 | 0.7818  | 0.82893 | Biso | 1 | O | -0.468512 |
| H32 | 1 | 0.471   | 0.755   | 0.8072  | Biso | 1 | H | 0.37886   |
| O61 | 1 | 0.91231 | 0.09066 | 0.84145 | Biso | 1 | O | -0.643592 |
| O62 | 1 | 0.79081 | 0.09674 | 0.9066  | Biso | 1 | O | -0.74106  |
| O63 | 1 | 0.08712 | 0.0482  | 0.88282 | Biso | 1 | O | -0.524558 |
| H33 | 1 | 0.044   | 0.06    | 0.8601  | Biso | 1 | H | 0.428868  |
| O64 | 1 | 0.59561 | 0.40015 | 0.15625 | Biso | 1 | O | -0.646577 |
| O65 | 1 | 0.71551 | 0.40373 | 0.08738 | Biso | 1 | O | -0.752918 |
| O66 | 1 | 0.41946 | 0.45138 | 0.11895 | Biso | 1 | O | -0.538181 |
| H34 | 1 | 0.462   | 0.442   | 0.1403  | Biso | 1 | H | 0.428449  |
| O67 | 1 | 0.37762 | 0.40639 | 0.30859 | Biso | 1 | O | -0.752107 |
| O68 | 1 | 0.51081 | 0.44366 | 0.24726 | Biso | 1 | O | -0.655397 |
| O69 | 1 | 0.24252 | 0.80129 | 0.2391  | Biso | 1 | O | -0.651536 |
| O70 | 1 | 0.3734  | 0.83884 | 0.17542 | Biso | 1 | O | -0.748864 |
| O71 | 1 | 0.53698 | 0.59117 | 0.17902 | Biso | 1 | O | -0.470937 |
| H35 | 1 | 0.557   | 0.543   | 0.2011  | Biso | 1 | H | 0.366802  |
| O72 | 1 | 0.20965 | 0.65272 | 0.30032 | Biso | 1 | O | -0.477221 |
| H36 | 1 | 0.203   | 0.702   | 0.2862  | Biso | 1 | H | 0.372854  |
| C49 | 1 | 0.8684  | 0.18202 | 0.60568 | Biso | 1 | C | 0.664274  |
| C50 | 1 | 0.8009  | 0.21621 | 0.55235 | Biso | 1 | C | -0.160516 |
| C51 | 1 | 0.7022  | 0.23296 | 0.56086 | Biso | 1 | C | 0.311293  |
| C52 | 1 | 0.6447  | 0.2673  | 0.50896 | Biso | 1 | C | -0.227632 |
| H37 | 1 | 0.5791  | 0.2789  | 0.5146  | Biso | 1 | H | 0.135748  |
| C53 | 1 | 0.6819  | 0.28492 | 0.44868 | Biso | 1 | C | -0.157184 |
| C54 | 1 | 0.7806  | 0.26698 | 0.44034 | Biso | 1 | C | 0.314666  |
| C55 | 1 | 0.8383  | 0.23262 | 0.49209 | Biso | 1 | C | -0.237827 |
| H38 | 1 | 0.9036  | 0.2202  | 0.4866  | Biso | 1 | H | 0.131806  |
| C56 | 1 | 0.615   | 0.32226 | 0.39534 | Biso | 1 | C | 0.67494   |
| C57 | 1 | 0.072   | 0.0537  | 0.71455 | Biso | 1 | C | 0.684302  |
| C58 | 1 | 0.1019  | 0.96835 | 0.73154 | Biso | 1 | C | -0.160142 |
| C59 | 1 | 0.0532  | 0.908   | 0.77852 | Biso | 1 | C | 0.301197  |
| C60 | 1 | 0.083   | 0.8302  | 0.79181 | Biso | 1 | C | -0.225149 |
| H39 | 1 | 0.0501  | 0.7903  | 0.8229  | Biso | 1 | H | 0.141272  |

|     |   |        |         |         |      |   |   |           |
|-----|---|--------|---------|---------|------|---|---|-----------|
| C61 | 1 | 0.1606 | 0.81005 | 0.75996 | Biso | 1 | C | -0.162875 |
| C62 | 1 | 0.2099 | 0.8703  | 0.71267 | Biso | 1 | C | 0.298348  |
| C63 | 1 | 0.1788 | 0.9479  | 0.69908 | Biso | 1 | C | -0.225454 |
| H40 | 1 | 0.2103 | 0.9877  | 0.6672  | Biso | 1 | H | 0.141468  |
| C64 | 1 | 0.1894 | 0.7241  | 0.77748 | Biso | 1 | C | 0.687006  |
| C65 | 1 | 0.9778 | 0.72764 | 0.2915  | Biso | 1 | C | 0.6863    |
| C66 | 1 | 0.9281 | 0.66942 | 0.26936 | Biso | 1 | C | -0.158466 |
| C67 | 1 | 0.9473 | 0.6661  | 0.21005 | Biso | 1 | C | 0.294353  |
| C68 | 1 | 0.896  | 0.6121  | 0.19108 | Biso | 1 | C | -0.227079 |
| H41 | 1 | 0.9074 | 0.6106  | 0.1514  | Biso | 1 | H | 0.133864  |
| C69 | 1 | 0.8281 | 0.56062 | 0.23015 | Biso | 1 | C | -0.16186  |
| C70 | 1 | 0.8094 | 0.56395 | 0.28956 | Biso | 1 | C | 0.298584  |
| C71 | 1 | 0.8605 | 0.6168  | 0.30837 | Biso | 1 | C | -0.230101 |
| H42 | 1 | 0.8498 | 0.6174  | 0.3483  | Biso | 1 | H | 0.135676  |
| C72 | 1 | 0.7766 | 0.50316 | 0.20747 | Biso | 1 | C | 0.679581  |
| C73 | 1 | 0.7318 | 0.9931  | 0.78908 | Biso | 1 | C | 0.688596  |
| C74 | 1 | 0.6814 | 0.93499 | 0.76698 | Biso | 1 | C | -0.161675 |
| C75 | 1 | 0.6994 | 0.93153 | 0.70744 | Biso | 1 | C | 0.3038    |
| C76 | 1 | 0.6484 | 0.87786 | 0.68916 | Biso | 1 | C | -0.232384 |
| H43 | 1 | 0.6599 | 0.8759  | 0.6496  | Biso | 1 | H | 0.135185  |
| C77 | 1 | 0.5801 | 0.82644 | 0.72845 | Biso | 1 | C | -0.161326 |
| C78 | 1 | 0.5622 | 0.8294  | 0.78779 | Biso | 1 | C | 0.295054  |
| C79 | 1 | 0.6138 | 0.8834  | 0.8062  | Biso | 1 | C | -0.22669  |
| H44 | 1 | 0.6027 | 0.885   | 0.8459  | Biso | 1 | H | 0.131826  |
| C80 | 1 | 0.53   | 0.76802 | 0.7063  | Biso | 1 | C | 0.681375  |
| C81 | 1 | 0.8759 | 0.07823 | 0.89518 | Biso | 1 | C | 0.670549  |
| C82 | 1 | 0.9417 | 0.03841 | 0.94835 | Biso | 1 | C | -0.161054 |
| C83 | 1 | 0.0418 | 0.0251  | 0.93999 | Biso | 1 | C | 0.311992  |
| C84 | 1 | 0.0986 | 0.98761 | 0.99125 | Biso | 1 | C | -0.23136  |
| H45 | 1 | 0.1652 | 0.9794  | 0.9856  | Biso | 1 | H | 0.13014   |
| C85 | 1 | 0.6295 | 0.41764 | 0.10153 | Biso | 1 | C | 0.679242  |
| C86 | 1 | 0.5608 | 0.45909 | 0.0499  | Biso | 1 | C | -0.157069 |
| C87 | 1 | 0.462  | 0.47428 | 0.06097 | Biso | 1 | C | 0.313898  |
| C88 | 1 | 0.5969 | 0.48509 | 0.98895 | Biso | 1 | C | -0.229005 |
| H46 | 1 | 0.6622 | 0.4749  | 0.9815  | Biso | 1 | H | 0.137301  |
| C89 | 1 | 0.4316 | 0.45745 | 0.27122 | Biso | 1 | C | 0.685799  |
| C90 | 1 | 0.4018 | 0.54285 | 0.25318 | Biso | 1 | C | -0.157743 |
| C91 | 1 | 0.4554 | 0.6041  | 0.20973 | Biso | 1 | C | 0.296619  |
| C92 | 1 | 0.4261 | 0.68189 | 0.19742 | Biso | 1 | C | -0.222436 |
| H47 | 1 | 0.4618 | 0.7222  | 0.1685  | Biso | 1 | H | 0.142218  |
| C93 | 1 | 0.3451 | 0.70167 | 0.22692 | Biso | 1 | C | -0.15908  |
| C94 | 1 | 0.2907 | 0.6404  | 0.26951 | Biso | 1 | C | 0.300453  |
| C95 | 1 | 0.3199 | 0.56264 | 0.28161 | Biso | 1 | C | -0.229337 |
| H48 | 1 | 0.2834 | 0.5223  | 0.3098  | Biso | 1 | H | 0.137079  |
| C96 | 1 | 0.3184 | 0.78728 | 0.21232 | Biso | 1 | C | 0.681917  |

```

data_LUSHOX_clean
_audit_creation_date      2014-07-02
_audit_creation_method    'Materials Studio'
_symmetry_space_group_name_H-M  'P1'
_symmetry_Int_Tables_number  1
_symmetry_cell_setting    triclinic
loop_
_symmetry_equiv_pos_as_xyz
  x,y,z
_cell_length_a            10.1978
_cell_length_b            13.5020
_cell_length_c            17.7070
_cell_angle_alpha         90.0000
_cell_angle_beta          90.0000
_cell_angle_gamma         90.0000
loop_
_atom_site_label
_atom_site_type_symbol
_atom_site_fract_x
_atom_site_fract_y
_atom_site_fract_z
_atom_site_U_iso_or_equiv
_atom_site_adp_type
_atom_site_occupancy
_atom_site_charge
Mn1  Mn  0.92547  0.15327  0.4834 0.01267  Uiso  1  1.042392
Mn2  Mn  0.08119  0.38919  0.46763  0.01267  Uiso  1  0.97009
Mn3  Mn  0.42547  0.84673  0.0166 0.01267  Uiso  1  1.04081
Mn4  Mn  0.58119  0.61081  0.03237  0.01267  Uiso  1  0.970709
Mn5  Mn  0.07453  0.84673  0.5166 0.01267  Uiso  1  1.042395
Mn6  Mn  0.91881  0.61081  0.53237  0.01267  Uiso  1  0.969969
Mn7  Mn  0.57453  0.15327  0.9834 0.01267  Uiso  1  1.039901
Mn8  Mn  0.41881  0.38919  0.96763  0.01267  Uiso  1  0.967325
H1   H   0.8078 0.4879 0.2855 0.01267  Uiso  1  0.125814
H2   H   0.6986 0.5063 0.1731 0.01267  Uiso  1  0.11967
H3   H   0.6247 0.2124 0.1678 0.01267  Uiso  1  0.118893
H4   H   0.7238 0.1977 0.2864 0.01267  Uiso  1  0.127494
H5   H   0.7958 0.6961 0.2405 0.01267  Uiso  1  0.121736
H6   H   0.8824 0.7701 0.3482 0.01267  Uiso  1  0.114822
H7   H   0.771  0.0364 0.2697 0.01267  Uiso  1  0.120397
H8   H   0.6837 0.9616 0.1631 0.01267  Uiso  1  0.120514
H9   H   0.3078 0.5121 0.2145 0.01267  Uiso  1  0.12561
H10  H   0.1986 0.4937 0.3269 0.01267  Uiso  1  0.11964
H11  H   0.1247 0.7876 0.3322 0.01267  Uiso  1  0.118935
H12  H   0.2238 0.8023 0.2136 0.01267  Uiso  1  0.127486
H13  H   0.2958 0.3039 0.2595 0.01267  Uiso  1  0.121978
H14  H   0.3824 0.2299 0.1518 0.01267  Uiso  1  0.114881
H15  H   0.271  0.9636 0.2303 0.01267  Uiso  1  0.12028
H16  H   0.1837 0.0384 0.3369 0.01267  Uiso  1  0.120521
H17  H   0.1922 0.5121 0.7145 0.01267  Uiso  1  0.125741
H18  H   0.3014 0.4937 0.8269 0.01267  Uiso  1  0.119883
H19  H   0.3753 0.7876 0.8322 0.01267  Uiso  1  0.119083

```

|     |   |        |        |        |         |      |   |           |
|-----|---|--------|--------|--------|---------|------|---|-----------|
| H20 | H | 0.2762 | 0.8023 | 0.7136 | 0.01267 | Uiso | 1 | 0.127646  |
| H21 | H | 0.2042 | 0.3039 | 0.7595 | 0.01267 | Uiso | 1 | 0.121823  |
| H22 | H | 0.1176 | 0.2299 | 0.6518 | 0.01267 | Uiso | 1 | 0.114882  |
| H23 | H | 0.229  | 0.9636 | 0.7303 | 0.01267 | Uiso | 1 | 0.120109  |
| H24 | H | 0.3163 | 0.0384 | 0.8369 | 0.01267 | Uiso | 1 | 0.120448  |
| H25 | H | 0.6922 | 0.4879 | 0.7855 | 0.01267 | Uiso | 1 | 0.125614  |
| H26 | H | 0.8014 | 0.5063 | 0.6731 | 0.01267 | Uiso | 1 | 0.119607  |
| H27 | H | 0.8753 | 0.2124 | 0.6678 | 0.01267 | Uiso | 1 | 0.118741  |
| H28 | H | 0.7762 | 0.1977 | 0.7864 | 0.01267 | Uiso | 1 | 0.12735   |
| H29 | H | 0.7042 | 0.6961 | 0.7405 | 0.01267 | Uiso | 1 | 0.121977  |
| H30 | H | 0.6176 | 0.7701 | 0.8482 | 0.01267 | Uiso | 1 | 0.114726  |
| H31 | H | 0.729  | 0.0364 | 0.7697 | 0.01267 | Uiso | 1 | 0.120489  |
| H32 | H | 0.8163 | 0.9616 | 0.6631 | 0.01267 | Uiso | 1 | 0.120614  |
| C1  | C | 0.8511 | 0.3283 | 0.3693 | 0.01267 | Uiso | 1 | 0.598473  |
| C2  | C | 0.7779 | 0.3398 | 0.2959 | 0.01267 | Uiso | 1 | -0.002164 |
| C3  | C | 0.77   | 0.4332 | 0.2621 | 0.01267 | Uiso | 1 | -0.112652 |
| C4  | C | 0.7066 | 0.4438 | 0.1947 | 0.01267 | Uiso | 1 | -0.097049 |
| C5  | C | 0.6532 | 0.3604 | 0.1576 | 0.01267 | Uiso | 1 | -0.044761 |
| C6  | C | 0.6601 | 0.2677 | 0.1915 | 0.01267 | Uiso | 1 | -0.101792 |
| C7  | C | 0.7215 | 0.2588 | 0.2623 | 0.01267 | Uiso | 1 | -0.106444 |
| C8  | C | 0.6764 | 0.7707 | 0.1219 | 0.01267 | Uiso | 1 | 0.594764  |
| C9  | C | 0.7319 | 0.8205 | 0.1908 | 0.01267 | Uiso | 1 | -0.020732 |
| C10 | C | 0.7908 | 0.7645 | 0.2462 | 0.01267 | Uiso | 1 | -0.113199 |
| C11 | C | 0.8435 | 0.809  | 0.3111 | 0.01267 | Uiso | 1 | -0.118499 |
| C12 | C | 0.8373 | 0.9124 | 0.3198 | 0.01267 | Uiso | 1 | -0.020555 |
| C13 | C | 0.7767 | 0.9681 | 0.2642 | 0.01267 | Uiso | 1 | -0.114015 |
| C14 | C | 0.7241 | 0.9231 | 0.2    | 0.01267 | Uiso | 1 | -0.105993 |
| C15 | C | 0.8974 | 0.961  | 0.3893 | 0.01267 | Uiso | 1 | 0.615235  |
| C16 | C | 0.5886 | 0.3724 | 0.0829 | 0.01267 | Uiso | 1 | 0.588316  |
| C17 | C | 0.3511 | 0.6717 | 0.1307 | 0.01267 | Uiso | 1 | 0.59818   |
| C18 | C | 0.2779 | 0.6602 | 0.2041 | 0.01267 | Uiso | 1 | -0.002357 |
| C19 | C | 0.27   | 0.5668 | 0.2379 | 0.01267 | Uiso | 1 | -0.11277  |
| C20 | C | 0.2066 | 0.5562 | 0.3053 | 0.01267 | Uiso | 1 | -0.097344 |
| C21 | C | 0.1532 | 0.6396 | 0.3424 | 0.01267 | Uiso | 1 | -0.045018 |
| C22 | C | 0.1601 | 0.7323 | 0.3085 | 0.01267 | Uiso | 1 | -0.102181 |
| C23 | C | 0.2215 | 0.7412 | 0.2377 | 0.01267 | Uiso | 1 | -0.106551 |
| C24 | C | 0.1764 | 0.2293 | 0.3781 | 0.01267 | Uiso | 1 | 0.593275  |
| C25 | C | 0.2319 | 0.1795 | 0.3092 | 0.01267 | Uiso | 1 | -0.020095 |
| C26 | C | 0.2908 | 0.2355 | 0.2538 | 0.01267 | Uiso | 1 | -0.112877 |
| C27 | C | 0.3435 | 0.191  | 0.1889 | 0.01267 | Uiso | 1 | -0.118128 |
| C28 | C | 0.3373 | 0.0876 | 0.1802 | 0.01267 | Uiso | 1 | -0.02161  |
| C29 | C | 0.2767 | 0.0319 | 0.2358 | 0.01267 | Uiso | 1 | -0.113059 |
| C30 | C | 0.2241 | 0.0769 | 0.3    | 0.01267 | Uiso | 1 | -0.106292 |
| C31 | C | 0.3974 | 0.039  | 0.1107 | 0.01267 | Uiso | 1 | 0.617556  |
| C32 | C | 0.0886 | 0.6276 | 0.4171 | 0.01267 | Uiso | 1 | 0.587494  |
| C33 | C | 0.1489 | 0.6717 | 0.6307 | 0.01267 | Uiso | 1 | 0.59856   |
| C34 | C | 0.2221 | 0.6602 | 0.7041 | 0.01267 | Uiso | 1 | -0.002456 |
| C35 | C | 0.23   | 0.5668 | 0.7379 | 0.01267 | Uiso | 1 | -0.112515 |
| C36 | C | 0.2934 | 0.5562 | 0.8053 | 0.01267 | Uiso | 1 | -0.097078 |
| C37 | C | 0.3468 | 0.6396 | 0.8424 | 0.01267 | Uiso | 1 | -0.044456 |
| C38 | C | 0.3399 | 0.7323 | 0.8085 | 0.01267 | Uiso | 1 | -0.101947 |
| C39 | C | 0.2785 | 0.7412 | 0.7377 | 0.01267 | Uiso | 1 | -0.106371 |

|     |   |        |        |        |         |      |   |           |
|-----|---|--------|--------|--------|---------|------|---|-----------|
| C40 | C | 0.3236 | 0.2293 | 0.8781 | 0.01267 | Uiso | 1 | 0.59328   |
| C41 | C | 0.2681 | 0.1795 | 0.8092 | 0.01267 | Uiso | 1 | -0.020259 |
| C42 | C | 0.2092 | 0.2355 | 0.7538 | 0.01267 | Uiso | 1 | -0.113223 |
| C43 | C | 0.1565 | 0.191  | 0.6889 | 0.01267 | Uiso | 1 | -0.118792 |
| C44 | C | 0.1627 | 0.0876 | 0.6802 | 0.01267 | Uiso | 1 | -0.020969 |
| C45 | C | 0.2233 | 0.0319 | 0.7358 | 0.01267 | Uiso | 1 | -0.113986 |
| C46 | C | 0.2759 | 0.0769 | 0.8    | 0.01267 | Uiso | 1 | -0.106716 |
| C47 | C | 0.1026 | 0.039  | 0.6107 | 0.01267 | Uiso | 1 | 0.615048  |
| C48 | C | 0.4114 | 0.6276 | 0.9171 | 0.01267 | Uiso | 1 | 0.586711  |
| C49 | C | 0.6489 | 0.3283 | 0.8693 | 0.01267 | Uiso | 1 | 0.597121  |
| C50 | C | 0.7221 | 0.3398 | 0.7959 | 0.01267 | Uiso | 1 | -0.001783 |
| C51 | C | 0.73   | 0.4332 | 0.7621 | 0.01267 | Uiso | 1 | -0.113139 |
| C52 | C | 0.7934 | 0.4438 | 0.6947 | 0.01267 | Uiso | 1 | -0.097245 |
| C53 | C | 0.8468 | 0.3604 | 0.6576 | 0.01267 | Uiso | 1 | -0.045338 |
| C54 | C | 0.8399 | 0.2677 | 0.6915 | 0.01267 | Uiso | 1 | -0.102022 |
| C55 | C | 0.7785 | 0.2588 | 0.7623 | 0.01267 | Uiso | 1 | -0.10703  |
| C56 | C | 0.8236 | 0.7707 | 0.6219 | 0.01267 | Uiso | 1 | 0.593313  |
| C57 | C | 0.7681 | 0.8205 | 0.6908 | 0.01267 | Uiso | 1 | -0.019938 |
| C58 | C | 0.7092 | 0.7645 | 0.7462 | 0.01267 | Uiso | 1 | -0.112903 |
| C59 | C | 0.6565 | 0.809  | 0.8111 | 0.01267 | Uiso | 1 | -0.117835 |
| C60 | C | 0.6627 | 0.9124 | 0.8198 | 0.01267 | Uiso | 1 | -0.021954 |
| C61 | C | 0.7233 | 0.9681 | 0.7642 | 0.01267 | Uiso | 1 | -0.112921 |
| C62 | C | 0.7759 | 0.9231 | 0.7    | 0.01267 | Uiso | 1 | -0.106067 |
| C63 | C | 0.6026 | 0.961  | 0.8893 | 0.01267 | Uiso | 1 | 0.617715  |
| C64 | C | 0.9114 | 0.3724 | 0.5829 | 0.01267 | Uiso | 1 | 0.587486  |
| O1  | O | 0.8208 | 0.2565 | 0.4109 | 0.01267 | Uiso | 1 | -0.556824 |
| O2  | O | 0.9386 | 0.3916 | 0.3823 | 0.01267 | Uiso | 1 | -0.539379 |
| O3  | O | 0.603  | 0.8195 | 0.0781 | 0.01267 | Uiso | 1 | -0.585444 |
| O4  | O | 0.7073 | 0.6812 | 0.1106 | 0.01267 | Uiso | 1 | -0.530736 |
| O5  | O | 0.5235 | 0.3005 | 0.0537 | 0.01267 | Uiso | 1 | -0.563788 |
| O6  | O | 0.8528 | 0.0446 | 0.4064 | 0.01267 | Uiso | 1 | -0.537095 |
| O7  | O | 0.9838 | 0.9144 | 0.4239 | 0.01267 | Uiso | 1 | -0.574792 |
| O8  | O | 0.5955 | 0.4533 | 0.0492 | 0.01267 | Uiso | 1 | -0.531362 |
| O9  | O | 0.3208 | 0.7435 | 0.0891 | 0.01267 | Uiso | 1 | -0.556531 |
| O10 | O | 0.4386 | 0.6084 | 0.1177 | 0.01267 | Uiso | 1 | -0.541877 |
| O11 | O | 0.103  | 0.1805 | 0.4219 | 0.01267 | Uiso | 1 | -0.581541 |
| O12 | O | 0.2073 | 0.3188 | 0.3894 | 0.01267 | Uiso | 1 | -0.531587 |
| O13 | O | 0.0235 | 0.6995 | 0.4463 | 0.01267 | Uiso | 1 | -0.564232 |
| O14 | O | 0.3528 | 0.9554 | 0.0936 | 0.01267 | Uiso | 1 | -0.53669  |
| O15 | O | 0.4838 | 0.0856 | 0.0761 | 0.01267 | Uiso | 1 | -0.574088 |
| O16 | O | 0.0955 | 0.5467 | 0.4508 | 0.01267 | Uiso | 1 | -0.532233 |
| O17 | O | 0.1792 | 0.7435 | 0.5891 | 0.01267 | Uiso | 1 | -0.556812 |
| O18 | O | 0.0614 | 0.6084 | 0.6177 | 0.01267 | Uiso | 1 | -0.539484 |
| O19 | O | 0.397  | 0.1805 | 0.9219 | 0.01267 | Uiso | 1 | -0.584368 |
| O20 | O | 0.2927 | 0.3188 | 0.8894 | 0.01267 | Uiso | 1 | -0.531313 |
| O21 | O | 0.4765 | 0.6995 | 0.9463 | 0.01267 | Uiso | 1 | -0.563621 |
| O22 | O | 0.1472 | 0.9554 | 0.5936 | 0.01267 | Uiso | 1 | -0.53713  |
| O23 | O | 0.0162 | 0.0856 | 0.5761 | 0.01267 | Uiso | 1 | -0.57483  |
| O24 | O | 0.4045 | 0.5467 | 0.9508 | 0.01267 | Uiso | 1 | -0.529498 |
| O25 | O | 0.6792 | 0.2565 | 0.9109 | 0.01267 | Uiso | 1 | -0.556244 |
| O26 | O | 0.5614 | 0.3916 | 0.8823 | 0.01267 | Uiso | 1 | -0.540566 |
| O27 | O | 0.897  | 0.8195 | 0.5781 | 0.01267 | Uiso | 1 | -0.581454 |

|     |   |        |        |        |         |      |   |           |
|-----|---|--------|--------|--------|---------|------|---|-----------|
| O28 | O | 0.7927 | 0.6812 | 0.6106 | 0.01267 | Uiso | 1 | -0.531644 |
| O29 | O | 0.9765 | 0.3005 | 0.5537 | 0.01267 | Uiso | 1 | -0.564318 |
| O30 | O | 0.6472 | 0.0446 | 0.9064 | 0.01267 | Uiso | 1 | -0.535433 |
| O31 | O | 0.5162 | 0.9144 | 0.9239 | 0.01267 | Uiso | 1 | -0.573157 |
| O32 | O | 0.9045 | 0.4533 | 0.5492 | 0.01267 | Uiso | 1 | -0.532371 |

```

data_LUSHOX01_clean
_audit_creation_date      2014-07-02
_audit_creation_method    'Materials Studio'
_symmetry_space_group_name_H-M  'P1'
_symmetry_Int_Tables_number  1
_symmetry_cell_setting    triclinic
loop_
_symmetry_equiv_pos_as_xyz
  x,y,z
_cell_length_a            10.1620
_cell_length_b            13.4140
_cell_length_c            17.6530
_cell_angle_alpha         90.2100
_cell_angle_beta          90.0000
_cell_angle_gamma         90.0000
loop_
_atom_site_label
_atom_site_type_symbol
_atom_site_fract_x
_atom_site_fract_y
_atom_site_fract_z
_atom_site_U_iso_or_equiv
_atom_site_adp_type
_atom_site_occupancy
_atom_site_charge
Mn1  Mn    0.08158    0.38887    0.46798    0.01267    Uiso  1    0.967
Mn2  Mn    0.92445    0.1535 0.48457    0.01267    Uiso  1    1.041
Mn3  Mn    0.58158    0.61113    0.03202    0.01267    Uiso  1    0.965
Mn4  Mn    0.42445    0.8465 0.01543    0.01267    Uiso  1    1.039
Mn5  Mn    0.91842    0.61113    0.53202    0.01267    Uiso  1    0.967
Mn6  Mn    0.07555    0.8465 0.51543    0.01267    Uiso  1    1.042
Mn7  Mn    0.41842    0.38887    0.96798    0.01267    Uiso  1    0.965
Mn8  Mn    0.57555    0.1535 0.98457    0.01267    Uiso  1    1.039
H1   H     0.8778 0.2103 0.6682 0.01267    Uiso  1    0.118
H2   H     0.8024 0.5084 0.6707 0.01267    Uiso  1    0.121
H3   H     0.7798 0.196  0.7881 0.01267    Uiso  1    0.126
H4   H     0.6901 0.491  0.7858 0.01267    Uiso  1    0.124
H5   H     0.2961 0.3063 0.2589 0.01267    Uiso  1    0.122
H6   H     0.1812 0.0361 0.3384 0.01267    Uiso  1    0.121
H7   H     0.3828 0.2305 0.1507 0.01267    Uiso  1    0.115
H8   H     0.2718 0.9603 0.2308 0.01267    Uiso  1    0.129
H9   H     0.3778 0.7897 0.8318 0.01267    Uiso  1    0.117
H10  H     0.3024 0.4916 0.8293 0.01267    Uiso  1    0.121
H11  H     0.2798 0.804  0.7119 0.01267    Uiso  1    0.126
H12  H     0.1901 0.509  0.7142 0.01267    Uiso  1    0.124
H13  H     0.7961 0.6937 0.2411 0.01267    Uiso  1    0.122
H14  H     0.6812 0.9639 0.1616 0.01267    Uiso  1    0.121
H15  H     0.8828 0.7695 0.3493 0.01267    Uiso  1    0.115
H16  H     0.7718 0.0397 0.2692 0.01267    Uiso  1    0.119
H17  H     0.1222 0.7897 0.3318 0.01267    Uiso  1    0.118
H18  H     0.1976 0.4916 0.3293 0.01267    Uiso  1    0.121

```

|     |   |         |        |         |         |         |      |       |        |
|-----|---|---------|--------|---------|---------|---------|------|-------|--------|
| H19 | H | 0.2202  | 0.804  | 0.2119  | 0.01267 | Uiso    | 1    | 0.126 |        |
| H20 | H | 0.3099  | 0.509  | 0.2142  | 0.01267 | Uiso    | 1    | 0.124 |        |
| H21 | H | 0.7039  | 0.6937 | 0.7411  | 0.01267 | Uiso    | 1    | 0.122 |        |
| H22 | H | 0.8188  | 0.9639 | 0.6616  | 0.01267 | Uiso    | 1    | 0.121 |        |
| H23 | H | 0.6172  | 0.7695 | 0.8493  | 0.01267 | Uiso    | 1    | 0.115 |        |
| H24 | H | 0.7282  | 0.0397 | 0.7692  | 0.01267 | Uiso    | 1    | 0.129 |        |
| H25 | H | 0.6222  | 0.2103 | 0.1682  | 0.01267 | Uiso    | 1    | 0.117 |        |
| H26 | H | 0.6976  | 0.5084 | 0.1707  | 0.01267 | Uiso    | 1    | 0.121 |        |
| H27 | H | 0.7202  | 0.196  | 0.2881  | 0.01267 | Uiso    | 1    | 0.126 |        |
| H28 | H | 0.8099  | 0.491  | 0.2858  | 0.01267 | Uiso    | 1    | 0.124 |        |
| H29 | H | 0.2039  | 0.3063 | 0.7589  | 0.01267 | Uiso    | 1    | 0.122 |        |
| H30 | H | 0.3188  | 0.0361 | 0.8384  | 0.01267 | Uiso    | 1    | 0.121 |        |
| H31 | H | 0.1172  | 0.2305 | 0.6507  | 0.01267 | Uiso    | 1    | 0.115 |        |
| H32 | H | 0.2282  | 0.9603 | 0.7308  | 0.01267 | Uiso    | 1    | 0.128 |        |
| C1  | C | 0.91136 |        | 0.37159 | 0.58272 | 0.01267 | Uiso | 1     | 0.588  |
| C2  | C | 0.84747 |        | 0.36057 | 0.65796 | 0.01267 | Uiso | 1     | -0.046 |
| C3  | C | 0.84139 |        | 0.2672  | 0.69253 | 0.01267 | Uiso | 1     | -0.103 |
| C4  | C | 0.79435 |        | 0.44465 | 0.69355 | 0.01267 | Uiso | 1     | -0.096 |
| C5  | C | 0.78125 |        | 0.2586  | 0.76307 | 0.01267 | Uiso | 1     | -0.106 |
| C6  | C | 0.72974 |        | 0.43463 | 0.76235 | 0.01267 | Uiso | 1     | -0.110 |
| C7  | C | 0.72337 |        | 0.34132 | 0.79695 | 0.01267 | Uiso | 1     | -0.006 |
| C8  | C | 0.64895 |        | 0.32949 | 0.8702  | 0.01267 | Uiso | 1     | 0.598  |
| C9  | C | 0.17617 |        | 0.22899 | 0.3787  | 0.01267 | Uiso | 1     | 0.593  |
| C10 | C | 0.23126 |        | 0.1789  | 0.30961 | 0.01267 | Uiso | 1     | -0.025 |
| C11 | C | 0.29104 |        | 0.2359  | 0.25317 | 0.01267 | Uiso | 1     | -0.109 |
| C12 | C | 0.22301 |        | 0.07548 | 0.30084 | 0.01267 | Uiso | 1     | -0.104 |
| C13 | C | 0.34307 |        | 0.19092 | 0.18894 | 0.01267 | Uiso | 1     | -0.114 |
| C14 | C | 0.27652 |        | 0.03066 | 0.23658 | 0.01267 | Uiso | 1     | -0.118 |
| C15 | C | 0.33702 |        | 0.08761 | 0.18049 | 0.01267 | Uiso | 1     | -0.025 |
| C16 | C | 0.39582 |        | 0.03844 | 0.11119 | 0.01267 | Uiso | 1     | 0.614  |
| C17 | C | 0.41136 |        | 0.62841 | 0.91728 | 0.01267 | Uiso | 1     | 0.587  |
| C18 | C | 0.34747 |        | 0.63943 | 0.84204 | 0.01267 | Uiso | 1     | -0.046 |
| C19 | C | 0.34139 |        | 0.7328  | 0.80747 | 0.01267 | Uiso | 1     | -0.103 |
| C20 | C | 0.29435 |        | 0.55535 | 0.80645 | 0.01267 | Uiso | 1     | -0.096 |
| C21 | C | 0.28125 |        | 0.7414  | 0.73693 | 0.01267 | Uiso | 1     | -0.106 |
| C22 | C | 0.22974 |        | 0.56537 | 0.73765 | 0.01267 | Uiso | 1     | -0.110 |
| C23 | C | 0.22337 |        | 0.65868 | 0.70305 | 0.01267 | Uiso | 1     | -0.005 |
| C24 | C | 0.14895 |        | 0.67051 | 0.6298  | 0.01267 | Uiso | 1     | 0.600  |
| C25 | C | 0.67617 |        | 0.77101 | 0.1213  | 0.01267 | Uiso | 1     | 0.593  |
| C26 | C | 0.73126 |        | 0.8211  | 0.19039 | 0.01267 | Uiso | 1     | -0.025 |
| C27 | C | 0.79104 |        | 0.7641  | 0.24683 | 0.01267 | Uiso | 1     | -0.109 |
| C28 | C | 0.72301 |        | 0.92452 | 0.19916 | 0.01267 | Uiso | 1     | -0.104 |
| C29 | C | 0.84307 |        | 0.80908 | 0.31106 | 0.01267 | Uiso | 1     | -0.115 |
| C30 | C | 0.77652 |        | 0.96934 | 0.26342 | 0.01267 | Uiso | 1     | -0.112 |
| C31 | C | 0.83702 |        | 0.91239 | 0.31951 | 0.01267 | Uiso | 1     | -0.025 |
| C32 | C | 0.89582 |        | 0.96156 | 0.38881 | 0.01267 | Uiso | 1     | 0.614  |
| C33 | C | 0.08864 |        | 0.62841 | 0.41728 | 0.01267 | Uiso | 1     | 0.588  |
| C34 | C | 0.15253 |        | 0.63943 | 0.34204 | 0.01267 | Uiso | 1     | -0.046 |
| C35 | C | 0.15861 |        | 0.7328  | 0.30747 | 0.01267 | Uiso | 1     | -0.103 |
| C36 | C | 0.20565 |        | 0.55535 | 0.30645 | 0.01267 | Uiso | 1     | -0.096 |
| C37 | C | 0.21875 |        | 0.7414  | 0.23693 | 0.01267 | Uiso | 1     | -0.106 |
| C38 | C | 0.27026 |        | 0.56537 | 0.23765 | 0.01267 | Uiso | 1     | -0.111 |

|     |   |         |         |         |         |      |   |        |
|-----|---|---------|---------|---------|---------|------|---|--------|
| C39 | C | 0.27663 | 0.65868 | 0.20305 | 0.01267 | Uiso | 1 | -0.005 |
| C40 | C | 0.35105 | 0.67051 | 0.1298  | 0.01267 | Uiso | 1 | 0.598  |
| C41 | C | 0.82383 | 0.77101 | 0.6213  | 0.01267 | Uiso | 1 | 0.593  |
| C42 | C | 0.76874 | 0.8211  | 0.69039 | 0.01267 | Uiso | 1 | -0.024 |
| C43 | C | 0.70896 | 0.7641  | 0.74683 | 0.01267 | Uiso | 1 | -0.109 |
| C44 | C | 0.77699 | 0.92452 | 0.69916 | 0.01267 | Uiso | 1 | -0.105 |
| C45 | C | 0.65693 | 0.80908 | 0.81106 | 0.01267 | Uiso | 1 | -0.114 |
| C46 | C | 0.72348 | 0.96934 | 0.76342 | 0.01267 | Uiso | 1 | -0.118 |
| C47 | C | 0.66298 | 0.91239 | 0.81951 | 0.01267 | Uiso | 1 | -0.025 |
| C48 | C | 0.60418 | 0.96156 | 0.88881 | 0.01267 | Uiso | 1 | 0.614  |
| C49 | C | 0.58864 | 0.37159 | 0.08272 | 0.01267 | Uiso | 1 | 0.587  |
| C50 | C | 0.65253 | 0.36057 | 0.15796 | 0.01267 | Uiso | 1 | -0.046 |
| C51 | C | 0.65861 | 0.2672  | 0.19253 | 0.01267 | Uiso | 1 | -0.103 |
| C52 | C | 0.70565 | 0.44465 | 0.19355 | 0.01267 | Uiso | 1 | -0.096 |
| C53 | C | 0.71875 | 0.2586  | 0.26307 | 0.01267 | Uiso | 1 | -0.106 |
| C54 | C | 0.77026 | 0.43463 | 0.26235 | 0.01267 | Uiso | 1 | -0.110 |
| C55 | C | 0.77663 | 0.34132 | 0.29695 | 0.01267 | Uiso | 1 | -0.006 |
| C56 | C | 0.85105 | 0.32949 | 0.3702  | 0.01267 | Uiso | 1 | 0.599  |
| C57 | C | 0.32383 | 0.22899 | 0.8787  | 0.01267 | Uiso | 1 | 0.593  |
| C58 | C | 0.26874 | 0.1789  | 0.80961 | 0.01267 | Uiso | 1 | -0.025 |
| C59 | C | 0.20896 | 0.2359  | 0.75317 | 0.01267 | Uiso | 1 | -0.109 |
| C60 | C | 0.27699 | 0.07548 | 0.80084 | 0.01267 | Uiso | 1 | -0.105 |
| C61 | C | 0.15693 | 0.19092 | 0.68894 | 0.01267 | Uiso | 1 | -0.115 |
| C62 | C | 0.22348 | 0.03066 | 0.73658 | 0.01267 | Uiso | 1 | -0.118 |
| C63 | C | 0.16298 | 0.08761 | 0.68049 | 0.01267 | Uiso | 1 | -0.025 |
| C64 | C | 0.10418 | 0.03844 | 0.61119 | 0.01267 | Uiso | 1 | 0.614  |
| O1  | O | 0.97675 | 0.3     | 0.55436 | 0.01267 | Uiso | 1 | -0.555 |
| O2  | O | 0.9029  | 0.45344 | 0.54814 | 0.01267 | Uiso | 1 | -0.538 |
| O3  | O | 0.55987 | 0.39203 | 0.88193 | 0.01267 | Uiso | 1 | -0.535 |
| O4  | O | 0.6812  | 0.25882 | 0.91271 | 0.01267 | Uiso | 1 | -0.558 |
| O5  | O | 0.20917 | 0.31893 | 0.39008 | 0.01267 | Uiso | 1 | -0.533 |
| O6  | O | 0.10204 | 0.18064 | 0.42188 | 0.01267 | Uiso | 1 | -0.577 |
| O7  | O | 0.35145 | 0.95427 | 0.0933  | 0.01267 | Uiso | 1 | -0.535 |
| O8  | O | 0.48501 | 0.08457 | 0.07708 | 0.01267 | Uiso | 1 | -0.578 |
| O9  | O | 0.47675 | 0.7     | 0.94564 | 0.01267 | Uiso | 1 | -0.557 |
| O10 | O | 0.4029  | 0.54656 | 0.95186 | 0.01267 | Uiso | 1 | -0.537 |
| O11 | O | 0.05987 | 0.60797 | 0.61807 | 0.01267 | Uiso | 1 | -0.539 |
| O12 | O | 0.1812  | 0.74118 | 0.58729 | 0.01267 | Uiso | 1 | -0.558 |
| O13 | O | 0.70917 | 0.68107 | 0.10992 | 0.01267 | Uiso | 1 | -0.533 |
| O14 | O | 0.60204 | 0.81936 | 0.07812 | 0.01267 | Uiso | 1 | -0.578 |
| O15 | O | 0.85145 | 0.04573 | 0.4067  | 0.01267 | Uiso | 1 | -0.535 |
| O16 | O | 0.98501 | 0.91543 | 0.42292 | 0.01267 | Uiso | 1 | -0.579 |
| O17 | O | 0.02325 | 0.7     | 0.44564 | 0.01267 | Uiso | 1 | -0.555 |
| O18 | O | 0.0971  | 0.54656 | 0.45186 | 0.01267 | Uiso | 1 | -0.538 |
| O19 | O | 0.44013 | 0.60797 | 0.11807 | 0.01267 | Uiso | 1 | -0.535 |
| O20 | O | 0.3188  | 0.74118 | 0.08729 | 0.01267 | Uiso | 1 | -0.558 |
| O21 | O | 0.79083 | 0.68107 | 0.60992 | 0.01267 | Uiso | 1 | -0.533 |
| O22 | O | 0.89796 | 0.81936 | 0.57812 | 0.01267 | Uiso | 1 | -0.577 |
| O23 | O | 0.64855 | 0.04573 | 0.9067  | 0.01267 | Uiso | 1 | -0.535 |
| O24 | O | 0.51499 | 0.91543 | 0.92292 | 0.01267 | Uiso | 1 | -0.578 |
| O25 | O | 0.52325 | 0.3     | 0.05436 | 0.01267 | Uiso | 1 | -0.557 |
| O26 | O | 0.5971  | 0.45344 | 0.04814 | 0.01267 | Uiso | 1 | -0.537 |

|     |   |         |         |         |         |      |   |        |
|-----|---|---------|---------|---------|---------|------|---|--------|
| O27 | O | 0.94013 | 0.39203 | 0.38193 | 0.01267 | Uiso | 1 | -0.539 |
| O28 | O | 0.8188  | 0.25882 | 0.41271 | 0.01267 | Uiso | 1 | -0.558 |
| O29 | O | 0.29083 | 0.31893 | 0.89008 | 0.01267 | Uiso | 1 | -0.533 |
| O30 | O | 0.39796 | 0.18064 | 0.92188 | 0.01267 | Uiso | 1 | -0.578 |
| O31 | O | 0.14855 | 0.95427 | 0.5933  | 0.01267 | Uiso | 1 | -0.536 |
| O32 | O | 0.01499 | 0.08457 | 0.57708 | 0.01267 | Uiso | 1 | -0.579 |

```

data_LUSHOX02_clean
_audit_creation_date      2014-07-02
_audit_creation_method    'Materials Studio'
_symmetry_space_group_name_H-M  'P1'
_symmetry_Int_Tables_number  1
_symmetry_cell_setting    triclinic
loop_
_symmetry_equiv_pos_as_xyz
  x,y,z
_cell_length_a            10.1898
_cell_length_b            13.5792
_cell_length_c            17.6223
_cell_angle_alpha        90.7380
_cell_angle_beta         90.0000
_cell_angle_gamma        90.0000
loop_
_atom_site_label
_atom_site_type_symbol
_atom_site_fract_x
_atom_site_fract_y
_atom_site_fract_z
_atom_site_U_iso_or_equiv
_atom_site_adp_type
_atom_site_occupancy
_atom_site_charge
Mn1  Mn   0.5797 0.38996   0.46572   0.01267   Uiso  1   0.964
Mn2  Mn   0.42994  0.1524 0.48031   0.01267   Uiso  1   1.036
Mn3  Mn   0.0797 0.61004   0.03428   0.01267   Uiso  1   0.965
Mn4  Mn   0.92994  0.8476 0.01969   0.01267   Uiso  1   1.037
Mn5  Mn   0.4203 0.61004   0.53428   0.01267   Uiso  1   0.962
Mn6  Mn   0.57006  0.8476 0.51969   0.01267   Uiso  1   1.037
Mn7  Mn   0.9203 0.38996   0.96572   0.01267   Uiso  1   0.965
Mn8  Mn   0.07006  0.1524 0.98031   0.01267   Uiso  1   1.037
H1   H    0.615 0.2313 0.6505 0.01267   Uiso  1   0.112
H2   H    0.372 0.2156 0.6662 0.01267   Uiso  1   0.120
H3   H    0.709 0.304 0.7567 0.01267   Uiso  1   0.121
H4   H    0.81  0.044 0.8334 0.01267   Uiso  1   0.124
H5   H    0.186 0.483 0.7874 0.01267   Uiso  1   0.121
H6   H    0.271 0.199 0.7797 0.01267   Uiso  1   0.126
H7   H    0.299 0.5044 0.6725 0.01267   Uiso  1   0.119
H8   H    0.721 0.97  0.7316 0.01267   Uiso  1   0.122
H9   H    0.115 0.7687 0.8495 0.01267   Uiso  1   0.112
H10  H    0.872 0.7844 0.8338 0.01267   Uiso  1   0.120
H11  H    0.209 0.696 0.7433 0.01267   Uiso  1   0.121
H12  H    0.31  0.956 0.6666 0.01267   Uiso  1   0.124
H13  H    0.686 0.517 0.7126 0.01267   Uiso  1   0.121
H14  H    0.771 0.801 0.7203 0.01267   Uiso  1   0.127
H15  H    0.799 0.4956 0.8275 0.01267   Uiso  1   0.119
H16  H    0.221 0.03  0.7684 0.01267   Uiso  1   0.122
H17  H    0.385 0.7687 0.3495 0.01267   Uiso  1   0.112
H18  H    0.628 0.7844 0.3338 0.01267   Uiso  1   0.120

```

|     |   |         |         |         |         |      |   |        |
|-----|---|---------|---------|---------|---------|------|---|--------|
| H19 | H | 0.291   | 0.696   | 0.2433  | 0.01267 | Uiso | 1 | 0.121  |
| H20 | H | 0.19    | 0.956   | 0.1666  | 0.01267 | Uiso | 1 | 0.124  |
| H21 | H | 0.814   | 0.517   | 0.2126  | 0.01267 | Uiso | 1 | 0.121  |
| H22 | H | 0.729   | 0.801   | 0.2203  | 0.01267 | Uiso | 1 | 0.127  |
| H23 | H | 0.701   | 0.4956  | 0.3275  | 0.01267 | Uiso | 1 | 0.120  |
| H24 | H | 0.279   | 0.03    | 0.2684  | 0.01267 | Uiso | 1 | 0.122  |
| H25 | H | 0.885   | 0.2313  | 0.1505  | 0.01267 | Uiso | 1 | 0.112  |
| H26 | H | 0.128   | 0.2156  | 0.1662  | 0.01267 | Uiso | 1 | 0.120  |
| H27 | H | 0.791   | 0.304   | 0.2567  | 0.01267 | Uiso | 1 | 0.121  |
| H28 | H | 0.69    | 0.044   | 0.3334  | 0.01267 | Uiso | 1 | 0.124  |
| H29 | H | 0.314   | 0.483   | 0.2874  | 0.01267 | Uiso | 1 | 0.121  |
| H30 | H | 0.229   | 0.199   | 0.2797  | 0.01267 | Uiso | 1 | 0.126  |
| H31 | H | 0.201   | 0.5044  | 0.1725  | 0.01267 | Uiso | 1 | 0.119  |
| H32 | H | 0.779   | 0.97    | 0.2316  | 0.01267 | Uiso | 1 | 0.122  |
| C1  | C | 0.3463  | 0.3594  | 0.65631 | 0.01267 | Uiso | 1 | -0.036 |
| C2  | C | 0.3377  | 0.26751 | 0.68813 | 0.01267 | Uiso | 1 | -0.113 |
| C3  | C | 0.2755  | 0.25695 | 0.75733 | 0.01267 | Uiso | 1 | -0.108 |
| C4  | C | 0.2193  | 0.33691 | 0.7936  | 0.01267 | Uiso | 1 | -0.010 |
| C5  | C | 0.2283  | 0.42901 | 0.7613  | 0.01267 | Uiso | 1 | -0.108 |
| C6  | C | 0.2933  | 0.441   | 0.69387 | 0.01267 | Uiso | 1 | -0.101 |
| C7  | C | 0.41356 | 0.37258 | 0.5824  | 0.01267 | Uiso | 1 | 0.591  |
| C8  | C | 0.1466  | 0.32411 | 0.86682 | 0.01267 | Uiso | 1 | 0.610  |
| C9  | C | 0.6617  | 0.09177 | 0.67893 | 0.01267 | Uiso | 1 | -0.025 |
| C10 | C | 0.6567  | 0.1924  | 0.68793 | 0.01267 | Uiso | 1 | -0.110 |
| C11 | C | 0.7093  | 0.23677 | 0.75215 | 0.01267 | Uiso | 1 | -0.117 |
| C12 | C | 0.7676  | 0.18157 | 0.80769 | 0.01267 | Uiso | 1 | -0.016 |
| C13 | C | 0.775   | 0.08066 | 0.79807 | 0.01267 | Uiso | 1 | -0.119 |
| C14 | C | 0.7216  | 0.03652 | 0.73429 | 0.01267 | Uiso | 1 | -0.112 |
| C15 | C | 0.6018  | 0.04301 | 0.60974 | 0.01267 | Uiso | 1 | 0.626  |
| C16 | C | 0.8237  | 0.2313  | 0.87682 | 0.01267 | Uiso | 1 | 0.600  |
| C17 | C | 0.8463  | 0.6406  | 0.84369 | 0.01267 | Uiso | 1 | -0.037 |
| C18 | C | 0.8377  | 0.73249 | 0.81187 | 0.01267 | Uiso | 1 | -0.113 |
| C19 | C | 0.7755  | 0.74305 | 0.74267 | 0.01267 | Uiso | 1 | -0.108 |
| C20 | C | 0.7193  | 0.66309 | 0.7064  | 0.01267 | Uiso | 1 | -0.010 |
| C21 | C | 0.7283  | 0.57099 | 0.7387  | 0.01267 | Uiso | 1 | -0.108 |
| C22 | C | 0.7933  | 0.559   | 0.80613 | 0.01267 | Uiso | 1 | -0.100 |
| C23 | C | 0.91356 | 0.62742 | 0.9176  | 0.01267 | Uiso | 1 | 0.590  |
| C24 | C | 0.6466  | 0.67589 | 0.63318 | 0.01267 | Uiso | 1 | 0.609  |
| C25 | C | 0.1617  | 0.90823 | 0.82107 | 0.01267 | Uiso | 1 | -0.025 |
| C26 | C | 0.1567  | 0.8076  | 0.81207 | 0.01267 | Uiso | 1 | -0.110 |
| C27 | C | 0.2093  | 0.76323 | 0.74785 | 0.01267 | Uiso | 1 | -0.118 |
| C28 | C | 0.2676  | 0.81843 | 0.69231 | 0.01267 | Uiso | 1 | -0.016 |
| C29 | C | 0.275   | 0.91934 | 0.70193 | 0.01267 | Uiso | 1 | -0.119 |
| C30 | C | 0.2216  | 0.96348 | 0.76571 | 0.01267 | Uiso | 1 | -0.112 |
| C31 | C | 0.1018  | 0.95699 | 0.89026 | 0.01267 | Uiso | 1 | 0.626  |
| C32 | C | 0.3237  | 0.7687  | 0.62318 | 0.01267 | Uiso | 1 | 0.600  |
| C33 | C | 0.6537  | 0.6406  | 0.34369 | 0.01267 | Uiso | 1 | -0.037 |
| C34 | C | 0.6623  | 0.73249 | 0.31187 | 0.01267 | Uiso | 1 | -0.113 |
| C35 | C | 0.7245  | 0.74305 | 0.24267 | 0.01267 | Uiso | 1 | -0.108 |
| C36 | C | 0.7807  | 0.66309 | 0.2064  | 0.01267 | Uiso | 1 | -0.010 |
| C37 | C | 0.7717  | 0.57099 | 0.2387  | 0.01267 | Uiso | 1 | -0.108 |
| C38 | C | 0.7067  | 0.559   | 0.30613 | 0.01267 | Uiso | 1 | -0.100 |

|     |   |         |         |         |         |      |   |        |
|-----|---|---------|---------|---------|---------|------|---|--------|
| C39 | C | 0.58644 | 0.62742 | 0.4176  | 0.01267 | Uiso | 1 | 0.589  |
| C40 | C | 0.8534  | 0.67589 | 0.13318 | 0.01267 | Uiso | 1 | 0.609  |
| C41 | C | 0.3383  | 0.90823 | 0.32107 | 0.01267 | Uiso | 1 | -0.025 |
| C42 | C | 0.3433  | 0.8076  | 0.31207 | 0.01267 | Uiso | 1 | -0.110 |
| C43 | C | 0.2907  | 0.76323 | 0.24785 | 0.01267 | Uiso | 1 | -0.117 |
| C44 | C | 0.2324  | 0.81843 | 0.19231 | 0.01267 | Uiso | 1 | -0.017 |
| C45 | C | 0.225   | 0.91934 | 0.20193 | 0.01267 | Uiso | 1 | -0.119 |
| C46 | C | 0.2784  | 0.96348 | 0.26571 | 0.01267 | Uiso | 1 | -0.112 |
| C47 | C | 0.3982  | 0.95699 | 0.39026 | 0.01267 | Uiso | 1 | 0.626  |
| C48 | C | 0.1763  | 0.7687  | 0.12318 | 0.01267 | Uiso | 1 | 0.600  |
| C49 | C | 0.1537  | 0.3594  | 0.15631 | 0.01267 | Uiso | 1 | -0.037 |
| C50 | C | 0.1623  | 0.26751 | 0.18813 | 0.01267 | Uiso | 1 | -0.113 |
| C51 | C | 0.2245  | 0.25695 | 0.25733 | 0.01267 | Uiso | 1 | -0.108 |
| C52 | C | 0.2807  | 0.33691 | 0.2936  | 0.01267 | Uiso | 1 | -0.010 |
| C53 | C | 0.2717  | 0.42901 | 0.2613  | 0.01267 | Uiso | 1 | -0.108 |
| C54 | C | 0.2067  | 0.441   | 0.19387 | 0.01267 | Uiso | 1 | -0.100 |
| C55 | C | 0.08644 | 0.37258 | 0.0824  | 0.01267 | Uiso | 1 | 0.590  |
| C56 | C | 0.3534  | 0.32411 | 0.36682 | 0.01267 | Uiso | 1 | 0.610  |
| C57 | C | 0.8383  | 0.09177 | 0.17893 | 0.01267 | Uiso | 1 | -0.025 |
| C58 | C | 0.8433  | 0.1924  | 0.18793 | 0.01267 | Uiso | 1 | -0.110 |
| C59 | C | 0.7907  | 0.23677 | 0.25215 | 0.01267 | Uiso | 1 | -0.117 |
| C60 | C | 0.7324  | 0.18157 | 0.30769 | 0.01267 | Uiso | 1 | -0.016 |
| C61 | C | 0.725   | 0.08066 | 0.29807 | 0.01267 | Uiso | 1 | -0.119 |
| C62 | C | 0.7784  | 0.03652 | 0.23429 | 0.01267 | Uiso | 1 | -0.112 |
| C63 | C | 0.8982  | 0.04301 | 0.10974 | 0.01267 | Uiso | 1 | 0.626  |
| C64 | C | 0.6763  | 0.2313  | 0.37682 | 0.01267 | Uiso | 1 | 0.600  |
| O1  | O | 0.47534 | 0.30189 | 0.55181 | 0.01267 | Uiso | 1 | -0.557 |
| O2  | O | 0.40978 | 0.4545  | 0.55148 | 0.01267 | Uiso | 1 | -0.537 |
| O3  | O | 0.06651 | 0.39005 | 0.88335 | 0.01267 | Uiso | 1 | -0.545 |
| O4  | O | 0.17256 | 0.25111 | 0.90503 | 0.01267 | Uiso | 1 | -0.554 |
| O5  | O | 0.521   | 0.09021 | 0.57356 | 0.01267 | Uiso | 1 | -0.575 |
| O6  | O | 0.6375  | 0.95792 | 0.59482 | 0.01267 | Uiso | 1 | -0.542 |
| O7  | O | 0.89175 | 0.18249 | 0.92112 | 0.01267 | Uiso | 1 | -0.577 |
| O8  | O | 0.7961  | 0.32034 | 0.88695 | 0.01267 | Uiso | 1 | -0.534 |
| O9  | O | 0.97534 | 0.69811 | 0.94819 | 0.01267 | Uiso | 1 | -0.557 |
| O10 | O | 0.90978 | 0.5455  | 0.94852 | 0.01267 | Uiso | 1 | -0.537 |
| O11 | O | 0.56651 | 0.60995 | 0.61665 | 0.01267 | Uiso | 1 | -0.544 |
| O12 | O | 0.67256 | 0.74889 | 0.59497 | 0.01267 | Uiso | 1 | -0.553 |
| O13 | O | 0.021   | 0.90979 | 0.92644 | 0.01267 | Uiso | 1 | -0.575 |
| O14 | O | 0.1375  | 0.04208 | 0.90518 | 0.01267 | Uiso | 1 | -0.542 |
| O15 | O | 0.39175 | 0.81751 | 0.57888 | 0.01267 | Uiso | 1 | -0.578 |
| O16 | O | 0.2961  | 0.67966 | 0.61305 | 0.01267 | Uiso | 1 | -0.532 |
| O17 | O | 0.52466 | 0.69811 | 0.44819 | 0.01267 | Uiso | 1 | -0.554 |
| O18 | O | 0.59022 | 0.5455  | 0.44852 | 0.01267 | Uiso | 1 | -0.535 |
| O19 | O | 0.93349 | 0.60995 | 0.11665 | 0.01267 | Uiso | 1 | -0.544 |
| O20 | O | 0.82744 | 0.74889 | 0.09497 | 0.01267 | Uiso | 1 | -0.553 |
| O21 | O | 0.479   | 0.90979 | 0.42644 | 0.01267 | Uiso | 1 | -0.575 |
| O22 | O | 0.3625  | 0.04208 | 0.40518 | 0.01267 | Uiso | 1 | -0.542 |
| O23 | O | 0.10825 | 0.81751 | 0.07888 | 0.01267 | Uiso | 1 | -0.577 |
| O24 | O | 0.2039  | 0.67966 | 0.11305 | 0.01267 | Uiso | 1 | -0.534 |
| O25 | O | 0.02466 | 0.30189 | 0.05181 | 0.01267 | Uiso | 1 | -0.557 |
| O26 | O | 0.09022 | 0.4545  | 0.05148 | 0.01267 | Uiso | 1 | -0.537 |

|     |   |         |         |         |         |      |   |        |
|-----|---|---------|---------|---------|---------|------|---|--------|
| O27 | O | 0.43349 | 0.39005 | 0.38335 | 0.01267 | Uiso | 1 | -0.545 |
| O28 | O | 0.32744 | 0.25111 | 0.40503 | 0.01267 | Uiso | 1 | -0.553 |
| O29 | O | 0.979   | 0.09021 | 0.07356 | 0.01267 | Uiso | 1 | -0.576 |
| O30 | O | 0.8625  | 0.95792 | 0.09482 | 0.01267 | Uiso | 1 | -0.542 |
| O31 | O | 0.60825 | 0.18249 | 0.42112 | 0.01267 | Uiso | 1 | -0.577 |
| O32 | O | 0.7039  | 0.32034 | 0.38695 | 0.01267 | Uiso | 1 | -0.535 |

```

data_LUSHOX03_clean
_cell_length_a 13.3961
_cell_length_b 10.1579
_cell_length_c 17.6555
_cell_angle_alpha 90
_cell_angle_beta 90.079
_cell_angle_gamma 90

_symmetry_space_group_name_H-M "P 1"
_symmetry_int_tables_number 1

```

```

loop_
_symmetry_equiv_pos_as_xyz
'x, y, z'

```

```

loop_
_atom_site_label
_atom_site_occupancy
_atom_site_fract_x
_atom_site_fract_y
_atom_site_fract_z
_atom_site_thermal_displace_type
_atom_site_B_iso_or_equiv
_atom_site_type_symbol
_atom_site_charge
Mn1 1 0.8465 0.42418 0.01539 Biso 1 Mn 1.040709
Mn2 1 0.61117 0.58167 0.03189 Biso 1 Mn 0.964634
C1 1 0.628 0.4115 0.91712 Biso 1 C 0.585733
C2 1 0.6396 0.3476 0.84198 Biso 1 C -0.047436
C3 1 0.5654 0.2301 0.7378 Biso 1 C -0.109084
H1 1 0.509 0.1902 0.7146 Biso 1 H 0.123868
C4 1 0.658 0.2237 0.70287 Biso 1 C -0.004425
C5 1 0.7411 0.2813 0.7367 Biso 1 C -0.106758
H2 1 0.8037 0.2795 0.7116 Biso 1 H 0.126347
C6 1 0.9127 0.663 0.81928 Biso 1 C -0.024029
C7 1 0.6706 0.1496 0.63 Biso 1 C 0.59759
C8 1 0.7639 0.7087 0.7464 Biso 1 C -0.108633
H3 1 0.6935 0.7033 0.7405 Biso 1 H 0.121256
C9 1 0.8213 0.7685 0.6902 Biso 1 C -0.025304
C10 1 0.9249 0.7766 0.6991 Biso 1 C -0.103375
H4 1 0.9645 0.8182 0.6615 Biso 1 H 0.120627
C11 1 0.7709 0.8239 0.6213 Biso 1 C 0.593169
C12 1 0.5553 0.2942 0.80615 Biso 1 C -0.093667
H5 1 0.4914 0.3022 0.82894 Biso 1 H 0.120803
C13 1 0.9695 0.7235 0.7632 Biso 1 C -0.10908
H6 1 0.04 0.7285 0.7689 Biso 1 H 0.117158
C14 1 0.7326 0.3414 0.8069 Biso 1 C -0.102058
H7 1 0.7898 0.3781 0.8309 Biso 1 H 0.117549
C15 1 0.8089 0.6566 0.8111 Biso 1 C -0.115804
H8 1 0.7693 0.617 0.8494 Biso 1 H 0.115432
O1 1 0.9154 0.5148 0.92297 Biso 1 O -0.579285
O2 1 0.70009 0.4766 0.94566 Biso 1 O -0.556968

```

|     |   |         |         |         |      |   |    |           |
|-----|---|---------|---------|---------|------|---|----|-----------|
| O3  | 1 | 0.54646 | 0.4024  | 0.95199 | Biso | 1 | O  | -0.532788 |
| O4  | 1 | 0.6079  | 0.0596  | 0.61818 | Biso | 1 | O  | -0.539664 |
| O5  | 1 | 0.7411  | 0.1817  | 0.58701 | Biso | 1 | O  | -0.555977 |
| O6  | 1 | 0.8195  | 0.8983  | 0.57794 | Biso | 1 | O  | -0.5824   |
| O7  | 1 | 0.681   | 0.7905  | 0.60982 | Biso | 1 | O  | -0.528862 |
| O8  | 1 | 0.0456  | 0.6493  | 0.90674 | Biso | 1 | O  | -0.530378 |
| C16 | 1 | 0.962   | 0.604   | 0.88885 | Biso | 1 | C  | 0.613493  |
| Mn3 | 1 | 0.1535  | 0.92418 | 0.48461 | Biso | 1 | Mn | 1.067129  |
| Mn4 | 1 | 0.38883 | 0.08167 | 0.46811 | Biso | 1 | Mn | 0.957951  |
| C17 | 1 | 0.372   | 0.9115  | 0.58288 | Biso | 1 | C  | 0.584444  |
| C18 | 1 | 0.3604  | 0.8476  | 0.65802 | Biso | 1 | C  | -0.047437 |
| C19 | 1 | 0.4346  | 0.7301  | 0.7622  | Biso | 1 | C  | -0.109432 |
| H9  | 1 | 0.491   | 0.6902  | 0.7854  | Biso | 1 | H  | 0.123434  |
| C20 | 1 | 0.342   | 0.7237  | 0.79713 | Biso | 1 | C  | -0.005446 |
| C21 | 1 | 0.2589  | 0.7813  | 0.7633  | Biso | 1 | C  | -0.106942 |
| H10 | 1 | 0.1963  | 0.7795  | 0.7884  | Biso | 1 | H  | 0.126561  |
| C22 | 1 | 0.0873  | 0.163   | 0.68072 | Biso | 1 | C  | -0.023352 |
| C23 | 1 | 0.3294  | 0.6496  | 0.87    | Biso | 1 | C  | 0.596928  |
| C24 | 1 | 0.2361  | 0.2087  | 0.7536  | Biso | 1 | C  | -0.10861  |
| H11 | 1 | 0.3065  | 0.2033  | 0.7595  | Biso | 1 | H  | 0.12108   |
| C25 | 1 | 0.1787  | 0.2685  | 0.8098  | Biso | 1 | C  | -0.025427 |
| C26 | 1 | 0.0751  | 0.2766  | 0.8009  | Biso | 1 | C  | -0.10344  |
| H12 | 1 | 0.0355  | 0.3182  | 0.8385  | Biso | 1 | H  | 0.121285  |
| C27 | 1 | 0.2291  | 0.3239  | 0.8787  | Biso | 1 | C  | 0.59308   |
| C28 | 1 | 0.4447  | 0.7942  | 0.69385 | Biso | 1 | C  | -0.094591 |
| H13 | 1 | 0.5086  | 0.8022  | 0.67106 | Biso | 1 | H  | 0.120165  |
| C29 | 1 | 0.0305  | 0.2235  | 0.7368  | Biso | 1 | C  | -0.109991 |
| H14 | 1 | 0.96    | 0.2285  | 0.7311  | Biso | 1 | H  | 0.117375  |
| C30 | 1 | 0.2674  | 0.8414  | 0.6931  | Biso | 1 | C  | -0.102943 |
| H15 | 1 | 0.2102  | 0.8781  | 0.6691  | Biso | 1 | H  | 0.117247  |
| C31 | 1 | 0.1911  | 0.1566  | 0.6889  | Biso | 1 | C  | -0.116256 |
| H16 | 1 | 0.2307  | 0.117   | 0.6506  | Biso | 1 | H  | 0.114677  |
| O9  | 1 | 0.0846  | 0.0148  | 0.57703 | Biso | 1 | O  | -0.58351  |
| O10 | 1 | 0.29991 | 0.9766  | 0.55434 | Biso | 1 | O  | -0.558069 |
| O11 | 1 | 0.45354 | 0.9024  | 0.54801 | Biso | 1 | O  | -0.534887 |
| O12 | 1 | 0.3921  | 0.5596  | 0.88182 | Biso | 1 | O  | -0.539155 |
| O13 | 1 | 0.2589  | 0.6817  | 0.91299 | Biso | 1 | O  | -0.55498  |
| O14 | 1 | 0.1805  | 0.3983  | 0.92206 | Biso | 1 | O  | -0.580671 |
| O15 | 1 | 0.319   | 0.2905  | 0.89018 | Biso | 1 | O  | -0.531775 |
| O16 | 1 | 0.9544  | 0.1493  | 0.59326 | Biso | 1 | O  | -0.531371 |
| C32 | 1 | 0.038   | 0.104   | 0.61115 | Biso | 1 | C  | 0.611952  |
| Mn5 | 1 | 0.1535  | 0.57582 | 0.98461 | Biso | 1 | Mn | 1.037019  |
| Mn6 | 1 | 0.38883 | 0.41833 | 0.96811 | Biso | 1 | Mn | 0.963446  |
| C33 | 1 | 0.372   | 0.5885  | 0.08288 | Biso | 1 | C  | 0.586185  |
| C34 | 1 | 0.3604  | 0.6524  | 0.15802 | Biso | 1 | C  | -0.046217 |
| C35 | 1 | 0.4346  | 0.7699  | 0.2622  | Biso | 1 | C  | -0.108736 |
| H17 | 1 | 0.491   | 0.8098  | 0.2854  | Biso | 1 | H  | 0.123692  |
| C36 | 1 | 0.342   | 0.7763  | 0.29713 | Biso | 1 | C  | -0.004577 |
| C37 | 1 | 0.2589  | 0.7187  | 0.2633  | Biso | 1 | C  | -0.10693  |
| H18 | 1 | 0.1963  | 0.7205  | 0.2884  | Biso | 1 | H  | 0.126447  |
| C38 | 1 | 0.0873  | 0.337   | 0.18072 | Biso | 1 | C  | -0.024106 |
| C39 | 1 | 0.3294  | 0.8504  | 0.37    | Biso | 1 | C  | 0.600289  |

|     |   |         |         |         |      |   |    |           |
|-----|---|---------|---------|---------|------|---|----|-----------|
| C40 | 1 | 0.2361  | 0.2913  | 0.2536  | Biso | 1 | C  | -0.108454 |
| H19 | 1 | 0.3065  | 0.2967  | 0.2595  | Biso | 1 | H  | 0.121059  |
| C41 | 1 | 0.1787  | 0.2315  | 0.3098  | Biso | 1 | C  | -0.025769 |
| C42 | 1 | 0.0751  | 0.2234  | 0.3009  | Biso | 1 | C  | -0.103948 |
| H20 | 1 | 0.0355  | 0.1818  | 0.3385  | Biso | 1 | H  | 0.120588  |
| C43 | 1 | 0.2291  | 0.1761  | 0.3787  | Biso | 1 | C  | 0.593576  |
| C44 | 1 | 0.4447  | 0.7058  | 0.19385 | Biso | 1 | C  | -0.094119 |
| H21 | 1 | 0.5086  | 0.6978  | 0.17106 | Biso | 1 | H  | 0.12046   |
| C45 | 1 | 0.0305  | 0.2765  | 0.2368  | Biso | 1 | C  | -0.109568 |
| H22 | 1 | 0.96    | 0.2715  | 0.2311  | Biso | 1 | H  | 0.117284  |
| C46 | 1 | 0.2674  | 0.6586  | 0.1931  | Biso | 1 | C  | -0.101703 |
| H23 | 1 | 0.2102  | 0.6219  | 0.1691  | Biso | 1 | H  | 0.117763  |
| C47 | 1 | 0.1911  | 0.3434  | 0.1889  | Biso | 1 | C  | -0.11571  |
| H24 | 1 | 0.2307  | 0.383   | 0.1506  | Biso | 1 | H  | 0.115001  |
| O17 | 1 | 0.0846  | 0.4852  | 0.07703 | Biso | 1 | O  | -0.577987 |
| O18 | 1 | 0.29991 | 0.5234  | 0.05434 | Biso | 1 | O  | -0.557095 |
| O19 | 1 | 0.45354 | 0.5976  | 0.04801 | Biso | 1 | O  | -0.533526 |
| O20 | 1 | 0.3921  | 0.9404  | 0.38182 | Biso | 1 | O  | -0.540582 |
| O21 | 1 | 0.2589  | 0.8183  | 0.41299 | Biso | 1 | O  | -0.561466 |
| O22 | 1 | 0.1805  | 0.1017  | 0.42206 | Biso | 1 | O  | -0.586545 |
| O23 | 1 | 0.319   | 0.2095  | 0.39018 | Biso | 1 | O  | -0.532328 |
| O24 | 1 | 0.9544  | 0.3507  | 0.09326 | Biso | 1 | O  | -0.530336 |
| C48 | 1 | 0.038   | 0.396   | 0.11115 | Biso | 1 | C  | 0.61363   |
| Mn7 | 1 | 0.8465  | 0.07582 | 0.51539 | Biso | 1 | Mn | 1.042426  |
| Mn8 | 1 | 0.61117 | 0.91833 | 0.53189 | Biso | 1 | Mn | 0.960759  |
| C49 | 1 | 0.628   | 0.0885  | 0.41712 | Biso | 1 | C  | 0.585585  |
| C50 | 1 | 0.6396  | 0.1524  | 0.34198 | Biso | 1 | C  | -0.046992 |
| C51 | 1 | 0.5654  | 0.2699  | 0.2378  | Biso | 1 | C  | -0.109285 |
| H25 | 1 | 0.509   | 0.3098  | 0.2146  | Biso | 1 | H  | 0.123771  |
| C52 | 1 | 0.658   | 0.2763  | 0.20287 | Biso | 1 | C  | -0.004556 |
| C53 | 1 | 0.7411  | 0.2187  | 0.2367  | Biso | 1 | C  | -0.106947 |
| H26 | 1 | 0.8037  | 0.2205  | 0.2116  | Biso | 1 | H  | 0.126416  |
| C54 | 1 | 0.9127  | 0.837   | 0.31928 | Biso | 1 | C  | -0.024382 |
| C55 | 1 | 0.6706  | 0.3504  | 0.13    | Biso | 1 | C  | 0.597566  |
| C56 | 1 | 0.7639  | 0.7913  | 0.2464  | Biso | 1 | C  | -0.108137 |
| H27 | 1 | 0.6935  | 0.7967  | 0.2405  | Biso | 1 | H  | 0.121459  |
| C57 | 1 | 0.8213  | 0.7315  | 0.1902  | Biso | 1 | C  | -0.024633 |
| C58 | 1 | 0.9249  | 0.7234  | 0.1991  | Biso | 1 | C  | -0.103266 |
| H28 | 1 | 0.9645  | 0.6818  | 0.1615  | Biso | 1 | H  | 0.121183  |
| C59 | 1 | 0.7709  | 0.6761  | 0.1213  | Biso | 1 | C  | 0.592564  |
| C60 | 1 | 0.5553  | 0.2058  | 0.30615 | Biso | 1 | C  | -0.093643 |
| H29 | 1 | 0.4914  | 0.1978  | 0.32894 | Biso | 1 | H  | 0.120842  |
| C61 | 1 | 0.9695  | 0.7765  | 0.2632  | Biso | 1 | C  | -0.109061 |
| H30 | 1 | 0.04    | 0.7715  | 0.2689  | Biso | 1 | H  | 0.117208  |
| C62 | 1 | 0.7326  | 0.1586  | 0.3069  | Biso | 1 | C  | -0.102367 |
| H31 | 1 | 0.7898  | 0.1219  | 0.3309  | Biso | 1 | H  | 0.1175    |
| C63 | 1 | 0.8089  | 0.8434  | 0.3111  | Biso | 1 | C  | -0.115039 |
| H32 | 1 | 0.7693  | 0.883   | 0.3494  | Biso | 1 | H  | 0.115557  |
| O25 | 1 | 0.9154  | 0.9852  | 0.42297 | Biso | 1 | O  | -0.57779  |
| O26 | 1 | 0.70009 | 0.0234  | 0.44566 | Biso | 1 | O  | -0.557811 |
| O27 | 1 | 0.54646 | 0.0976  | 0.45199 | Biso | 1 | O  | -0.531772 |
| O28 | 1 | 0.6079  | 0.4404  | 0.11818 | Biso | 1 | O  | -0.539157 |

|     |   |        |        |         |      |   |   |           |
|-----|---|--------|--------|---------|------|---|---|-----------|
| O29 | 1 | 0.7411 | 0.3183 | 0.08701 | Biso | 1 | O | -0.556184 |
| O30 | 1 | 0.8195 | 0.6017 | 0.07794 | Biso | 1 | O | -0.580058 |
| O31 | 1 | 0.681  | 0.7095 | 0.10982 | Biso | 1 | O | -0.530922 |
| O32 | 1 | 0.0456 | 0.8507 | 0.40674 | Biso | 1 | O | -0.529145 |
| C64 | 1 | 0.962  | 0.896  | 0.38885 | Biso | 1 | C | 0.614158  |

data\_LUSHOX04

\_cell\_length\_a 13.6353  
\_cell\_length\_b 10.2259  
\_cell\_length\_c 17.6925  
\_cell\_angle\_alpha 90  
\_cell\_angle\_beta 90.704  
\_cell\_angle\_gamma 90

\_symmetry\_space\_group\_name\_H-M "P 1"  
\_symmetry\_int\_tables\_number 1

loop\_

\_symmetry\_equiv\_pos\_as\_xyz  
'x, y, z'

loop\_

\_atom\_site\_label  
\_atom\_site\_occupancy  
\_atom\_site\_fract\_x  
\_atom\_site\_fract\_y  
\_atom\_site\_fract\_z  
\_atom\_site\_thermal\_displace\_type  
\_atom\_site\_B\_iso\_or\_equiv  
\_atom\_site\_type\_symbol  
\_atom\_site\_charge

|     |   |         |         |         |      |   |    |           |
|-----|---|---------|---------|---------|------|---|----|-----------|
| Mn1 | 1 | 0.38998 | 0.92028 | 0.96582 | Biso | 1 | Mn | 0.969566  |
| Mn2 | 1 | 0.15231 | 0.07019 | 0.98044 | Biso | 1 | Mn | 1.042074  |
| O1  | 1 | 0.39003 | 0.06607 | 0.88339 | Biso | 1 | O  | -0.544104 |
| O2  | 1 | 0.32015 | 0.7961  | 0.88709 | Biso | 1 | O  | -0.536068 |
| O3  | 1 | 0.30207 | 0.47525 | 0.55193 | Biso | 1 | O  | -0.55806  |
| O4  | 1 | 0.25122 | 0.17252 | 0.90529 | Biso | 1 | O  | -0.556915 |
| O5  | 1 | 0.182   | 0.89201 | 0.92125 | Biso | 1 | O  | -0.577899 |
| O6  | 1 | 0.09025 | 0.52068 | 0.57364 | Biso | 1 | O  | -0.582295 |
| O7  | 1 | 0.45454 | 0.41015 | 0.55139 | Biso | 1 | O  | -0.537946 |
| O8  | 1 | 0.95763 | 0.6374  | 0.59482 | Biso | 1 | O  | -0.578065 |
| C1  | 1 | 0.23073 | 0.8237  | 0.87702 | Biso | 1 | C  | 0.596503  |
| C2  | 1 | 0.18104 | 0.7676  | 0.80777 | Biso | 1 | C  | -0.020459 |
| C3  | 1 | 0.23636 | 0.7091  | 0.75228 | Biso | 1 | C  | -0.112448 |
| H1  | 1 | 0.3042  | 0.705   | 0.758   | Biso | 1 | H  | 0.120847  |
| C4  | 1 | 0.19228 | 0.6566  | 0.68834 | Biso | 1 | C  | -0.116251 |
| H2  | 1 | 0.2306  | 0.6179  | 0.6514  | Biso | 1 | H  | 0.113577  |
| C5  | 1 | 0.09124 | 0.6615  | 0.67908 | Biso | 1 | C  | -0.024006 |
| C6  | 1 | 0.03637 | 0.7218  | 0.73425 | Biso | 1 | C  | -0.11185  |
| H3  | 1 | 0.9686  | 0.7265  | 0.7284  | Biso | 1 | H  | 0.119174  |
| C7  | 1 | 0.08052 | 0.7753  | 0.79817 | Biso | 1 | C  | -0.109242 |
| H4  | 1 | 0.0425  | 0.8164  | 0.8345  | Biso | 1 | H  | 0.12158   |
| C8  | 1 | 0.32429 | 0.1467  | 0.86665 | Biso | 1 | C  | 0.603806  |
| C9  | 1 | 0.33688 | 0.2194  | 0.79365 | Biso | 1 | C  | -0.007127 |
| C10 | 1 | 0.4291  | 0.2282  | 0.76131 | Biso | 1 | C  | -0.111051 |
| H5  | 1 | 0.483   | 0.19    | 0.7853  | Biso | 1 | H  | 0.123844  |
| C11 | 1 | 0.44082 | 0.2932  | 0.69383 | Biso | 1 | C  | -0.100079 |
| H6  | 1 | 0.5029  | 0.3018  | 0.6733  | Biso | 1 | H  | 0.119967  |

|     |   |         |         |         |      |   |    |           |
|-----|---|---------|---------|---------|------|---|----|-----------|
| C12 | 1 | 0.35942 | 0.3463  | 0.6563  | Biso | 1 | C  | -0.042344 |
| C13 | 1 | 0.26732 | 0.3375  | 0.68817 | Biso | 1 | C  | -0.106083 |
| H7  | 1 | 0.2129  | 0.3725  | 0.6633  | Biso | 1 | H  | 0.117018  |
| C14 | 1 | 0.25711 | 0.2759  | 0.75761 | Biso | 1 | C  | -0.105968 |
| H8  | 1 | 0.1958  | 0.2727  | 0.7801  | Biso | 1 | H  | 0.12558   |
| C15 | 1 | 0.37261 | 0.4136  | 0.58246 | Biso | 1 | C  | 0.589273  |
| C16 | 1 | 0.04282 | 0.6018  | 0.6099  | Biso | 1 | C  | 0.630397  |
| Mn3 | 1 | 0.61002 | 0.42028 | 0.53418 | Biso | 1 | Mn | 0.968891  |
| Mn4 | 1 | 0.84769 | 0.57019 | 0.51956 | Biso | 1 | Mn | 1.155602  |
| O9  | 1 | 0.60997 | 0.56607 | 0.61661 | Biso | 1 | O  | -0.545731 |
| O10 | 1 | 0.67985 | 0.2961  | 0.61291 | Biso | 1 | O  | -0.534724 |
| O11 | 1 | 0.69793 | 0.97525 | 0.94807 | Biso | 1 | O  | -0.556786 |
| O12 | 1 | 0.74878 | 0.67252 | 0.59471 | Biso | 1 | O  | -0.581916 |
| O13 | 1 | 0.818   | 0.39201 | 0.57875 | Biso | 1 | O  | -0.596727 |
| O14 | 1 | 0.90975 | 0.02068 | 0.92636 | Biso | 1 | O  | -0.577906 |
| O15 | 1 | 0.54546 | 0.91015 | 0.94861 | Biso | 1 | O  | -0.536079 |
| O16 | 1 | 0.04237 | 0.1374  | 0.90518 | Biso | 1 | O  | -0.542579 |
| C17 | 1 | 0.76927 | 0.3237  | 0.62298 | Biso | 1 | C  | 0.601437  |
| C18 | 1 | 0.81896 | 0.2676  | 0.69223 | Biso | 1 | C  | -0.021841 |
| C19 | 1 | 0.76364 | 0.2091  | 0.74772 | Biso | 1 | C  | -0.111346 |
| H9  | 1 | 0.6958  | 0.205   | 0.742   | Biso | 1 | H  | 0.121826  |
| C20 | 1 | 0.80772 | 0.1566  | 0.81166 | Biso | 1 | C  | -0.115339 |
| H10 | 1 | 0.7694  | 0.1179  | 0.8486  | Biso | 1 | H  | 0.11418   |
| C21 | 1 | 0.90876 | 0.1615  | 0.82092 | Biso | 1 | C  | -0.022834 |
| C22 | 1 | 0.96363 | 0.2218  | 0.76575 | Biso | 1 | C  | -0.111645 |
| H11 | 1 | 0.0314  | 0.2265  | 0.7716  | Biso | 1 | H  | 0.119081  |
| C23 | 1 | 0.91948 | 0.2753  | 0.70183 | Biso | 1 | C  | -0.108062 |
| H12 | 1 | 0.9575  | 0.3164  | 0.6655  | Biso | 1 | H  | 0.1212    |
| C24 | 1 | 0.67571 | 0.6467  | 0.63335 | Biso | 1 | C  | 0.607423  |
| C25 | 1 | 0.66312 | 0.7194  | 0.70635 | Biso | 1 | C  | -0.007393 |
| C26 | 1 | 0.5709  | 0.7282  | 0.73869 | Biso | 1 | C  | -0.110951 |
| H13 | 1 | 0.517   | 0.69    | 0.7147  | Biso | 1 | H  | 0.124505  |
| C27 | 1 | 0.55918 | 0.7932  | 0.80617 | Biso | 1 | C  | -0.09968  |
| H14 | 1 | 0.4971  | 0.8018  | 0.8267  | Biso | 1 | H  | 0.120511  |
| C28 | 1 | 0.64058 | 0.8463  | 0.8437  | Biso | 1 | C  | -0.042664 |
| C29 | 1 | 0.73268 | 0.8375  | 0.81183 | Biso | 1 | C  | -0.106298 |
| H15 | 1 | 0.7871  | 0.8725  | 0.8367  | Biso | 1 | H  | 0.116945  |
| C30 | 1 | 0.74289 | 0.7759  | 0.74239 | Biso | 1 | C  | -0.10582  |
| H16 | 1 | 0.8042  | 0.7727  | 0.7199  | Biso | 1 | H  | 0.12486   |
| C31 | 1 | 0.62739 | 0.9136  | 0.91754 | Biso | 1 | C  | 0.58919   |
| C32 | 1 | 0.95718 | 0.1018  | 0.8901  | Biso | 1 | C  | 0.625533  |
| Mn5 | 1 | 0.61002 | 0.07972 | 0.03418 | Biso | 1 | Mn | 0.970078  |
| Mn6 | 1 | 0.84769 | 0.92981 | 0.01956 | Biso | 1 | Mn | 1.043839  |
| O17 | 1 | 0.60997 | 0.93393 | 0.11661 | Biso | 1 | O  | -0.545309 |
| O18 | 1 | 0.67985 | 0.2039  | 0.11291 | Biso | 1 | O  | -0.533705 |
| O19 | 1 | 0.69793 | 0.52475 | 0.44807 | Biso | 1 | O  | -0.573898 |
| O20 | 1 | 0.74878 | 0.82748 | 0.09471 | Biso | 1 | O  | -0.558915 |
| O21 | 1 | 0.818   | 0.10799 | 0.07875 | Biso | 1 | O  | -0.57814  |
| O22 | 1 | 0.90975 | 0.47932 | 0.42636 | Biso | 1 | O  | -0.60663  |
| O23 | 1 | 0.54546 | 0.58985 | 0.44861 | Biso | 1 | O  | -0.539059 |
| O24 | 1 | 0.04237 | 0.3626  | 0.40518 | Biso | 1 | O  | -0.544107 |
| C33 | 1 | 0.76927 | 0.1763  | 0.12298 | Biso | 1 | C  | 0.596613  |

|     |   |         |         |         |      |   |    |           |
|-----|---|---------|---------|---------|------|---|----|-----------|
| C34 | 1 | 0.81896 | 0.2324  | 0.19223 | Biso | 1 | C  | -0.019695 |
| C35 | 1 | 0.76364 | 0.2909  | 0.24772 | Biso | 1 | C  | -0.112433 |
| H17 | 1 | 0.6958  | 0.295   | 0.242   | Biso | 1 | H  | 0.121556  |
| C36 | 1 | 0.80772 | 0.3434  | 0.31166 | Biso | 1 | C  | -0.115035 |
| H18 | 1 | 0.7694  | 0.3821  | 0.3486  | Biso | 1 | H  | 0.113905  |
| C37 | 1 | 0.90876 | 0.3385  | 0.32092 | Biso | 1 | C  | -0.025094 |
| C38 | 1 | 0.96363 | 0.2782  | 0.26575 | Biso | 1 | C  | -0.112084 |
| H19 | 1 | 0.0314  | 0.2735  | 0.2716  | Biso | 1 | H  | 0.118865  |
| C39 | 1 | 0.91948 | 0.2247  | 0.20183 | Biso | 1 | C  | -0.108567 |
| H20 | 1 | 0.9575  | 0.1836  | 0.1655  | Biso | 1 | H  | 0.121697  |
| C40 | 1 | 0.67571 | 0.8533  | 0.13335 | Biso | 1 | C  | 0.60491   |
| C41 | 1 | 0.66312 | 0.7806  | 0.20635 | Biso | 1 | C  | -0.00673  |
| C42 | 1 | 0.5709  | 0.7718  | 0.23869 | Biso | 1 | C  | -0.110551 |
| H21 | 1 | 0.517   | 0.81    | 0.2147  | Biso | 1 | H  | 0.124526  |
| C43 | 1 | 0.55918 | 0.7068  | 0.30617 | Biso | 1 | C  | -0.099565 |
| H22 | 1 | 0.4971  | 0.6982  | 0.3267  | Biso | 1 | H  | 0.120552  |
| C44 | 1 | 0.64058 | 0.6537  | 0.3437  | Biso | 1 | C  | -0.042205 |
| C45 | 1 | 0.73268 | 0.6625  | 0.31183 | Biso | 1 | C  | -0.106784 |
| H23 | 1 | 0.7871  | 0.6275  | 0.3367  | Biso | 1 | H  | 0.116765  |
| C46 | 1 | 0.74289 | 0.7241  | 0.24239 | Biso | 1 | C  | -0.105672 |
| H24 | 1 | 0.8042  | 0.7273  | 0.2199  | Biso | 1 | H  | 0.125096  |
| C47 | 1 | 0.62739 | 0.5864  | 0.41754 | Biso | 1 | C  | 0.593412  |
| C48 | 1 | 0.95718 | 0.3982  | 0.3901  | Biso | 1 | C  | 0.631611  |
| Mn7 | 1 | 0.38998 | 0.57972 | 0.46582 | Biso | 1 | Mn | 0.969756  |
| Mn8 | 1 | 0.15231 | 0.42981 | 0.48044 | Biso | 1 | Mn | 1.063385  |
| O25 | 1 | 0.39003 | 0.43393 | 0.38339 | Biso | 1 | O  | -0.545736 |
| O26 | 1 | 0.32015 | 0.7039  | 0.38709 | Biso | 1 | O  | -0.53729  |
| O27 | 1 | 0.30207 | 0.02475 | 0.05193 | Biso | 1 | O  | -0.558151 |
| O28 | 1 | 0.25122 | 0.32748 | 0.40529 | Biso | 1 | O  | -0.555423 |
| O29 | 1 | 0.182   | 0.60799 | 0.42125 | Biso | 1 | O  | -0.585092 |
| O30 | 1 | 0.09025 | 0.97932 | 0.07364 | Biso | 1 | O  | -0.576871 |
| O31 | 1 | 0.45454 | 0.08985 | 0.05139 | Biso | 1 | O  | -0.538343 |
| O32 | 1 | 0.95763 | 0.8626  | 0.09482 | Biso | 1 | O  | -0.541535 |
| C49 | 1 | 0.23073 | 0.6763  | 0.37702 | Biso | 1 | C  | 0.596854  |
| C50 | 1 | 0.18104 | 0.7324  | 0.30777 | Biso | 1 | C  | -0.02024  |
| C51 | 1 | 0.23636 | 0.7909  | 0.25228 | Biso | 1 | C  | -0.112168 |
| H25 | 1 | 0.3042  | 0.795   | 0.258   | Biso | 1 | H  | 0.1211    |
| C52 | 1 | 0.19228 | 0.8434  | 0.18834 | Biso | 1 | C  | -0.115749 |
| H26 | 1 | 0.2306  | 0.8821  | 0.1514  | Biso | 1 | H  | 0.11397   |
| C53 | 1 | 0.09124 | 0.8385  | 0.17908 | Biso | 1 | C  | -0.02333  |
| C54 | 1 | 0.03637 | 0.7782  | 0.23425 | Biso | 1 | C  | -0.112892 |
| H27 | 1 | 0.9686  | 0.7735  | 0.2284  | Biso | 1 | H  | 0.119108  |
| C55 | 1 | 0.08052 | 0.7247  | 0.29817 | Biso | 1 | C  | -0.108965 |
| H28 | 1 | 0.0425  | 0.6836  | 0.3345  | Biso | 1 | H  | 0.12116   |
| C56 | 1 | 0.32429 | 0.3533  | 0.36665 | Biso | 1 | C  | 0.604422  |
| C57 | 1 | 0.33688 | 0.2806  | 0.29365 | Biso | 1 | C  | -0.007237 |
| C58 | 1 | 0.4291  | 0.2718  | 0.26131 | Biso | 1 | C  | -0.110184 |
| H29 | 1 | 0.483   | 0.31    | 0.2853  | Biso | 1 | H  | 0.124194  |
| C59 | 1 | 0.44082 | 0.2068  | 0.19383 | Biso | 1 | C  | -0.099603 |
| H30 | 1 | 0.5029  | 0.1982  | 0.1733  | Biso | 1 | H  | 0.120163  |
| C60 | 1 | 0.35942 | 0.1537  | 0.1563  | Biso | 1 | C  | -0.04155  |
| C61 | 1 | 0.26732 | 0.1625  | 0.18817 | Biso | 1 | C  | -0.105405 |

|     |   |         |        |        |         |      |   |          |           |
|-----|---|---------|--------|--------|---------|------|---|----------|-----------|
| H31 | 1 | 0.2129  | 0.1275 | 0.1633 | Biso    | 1    | H | 0.117587 |           |
| C62 | 1 | 0.25711 |        | 0.2241 | 0.25761 | Biso | 1 | C        | -0.106208 |
| H32 | 1 | 0.1958  | 0.2273 | 0.2801 | Biso    | 1    | H | 0.125376 |           |
| C63 | 1 | 0.37261 |        | 0.0864 | 0.08246 | Biso | 1 | C        | 0.591082  |
| C64 | 1 | 0.04282 |        | 0.8982 | 0.1099  | Biso | 1 | C        | 0.624759  |

```

data_VAGTAA_clean
_audit_creation_date      2014-07-02
_audit_creation_method    'Materials Studio'
_symmetry_space_group_name_H-M  'P1'
_symmetry_Int_Tables_number  1
_symmetry_cell_setting    triclinic
loop_
_symmetry_equiv_pos_as_xyz
  x,y,z
_cell_length_a            9.5856
_cell_length_b            10.0263
_cell_length_c            10.0263
_cell_angle_alpha        107.1440
_cell_angle_beta         109.3330
_cell_angle_gamma        70.6671
loop_
_atom_site_label
_atom_site_type_symbol
_atom_site_fract_x
_atom_site_fract_y
_atom_site_fract_z
_atom_site_U_iso_or_equiv
_atom_site_adp_type
_atom_site_occupancy
_atom_site_charge
Mg1  Mg  0.5  0  0  0.01267  Uiso  1  1.548388
Mg2  Mg  0  0  0  0.01267  Uiso  1  1.548427
H1   H   0.6348 0.8666 0.3296 0.01267  Uiso  1  0.154086
H2   H   0.1526 0.1084 0.3388 0.01267  Uiso  1  0.384376
H3   H   0.8652 0.3296 0.8666 0.01267  Uiso  1  0.154154
H4   H   0.3474 0.3388 0.1084 0.01267  Uiso  1  0.384391
H5   H   0.3652 0.1334 0.6704 0.01267  Uiso  1  0.154161
H6   H   0.8474 0.8916 0.6612 0.01267  Uiso  1  0.384448
H7   H   0.1348 0.6704 0.1334 0.01267  Uiso  1  0.154153
H8   H   0.6526 0.6612 0.8916 0.01267  Uiso  1  0.384476
C1   C   0.3428 0.9516 0.1958 0.01267  Uiso  1  0.66822
C2   C   0.4225 0.9777 0.3533 0.01267  Uiso  1  -0.167525
C3   C   0.5807 0.9197 0.3983 0.01267  Uiso  1  -0.219424
C4   C   0.3428 0.0606 0.458  0.01267  Uiso  1  0.307563
C5   C   0.1572 0.1958 0.9516 0.01267  Uiso  1  0.668312
C6   C   0.0775 0.3533 0.9777 0.01267  Uiso  1  -0.167513
C7   C   0.9193 0.3983 0.9197 0.01267  Uiso  1  -0.219444
C8   C   0.1572 0.458  0.0606 0.01267  Uiso  1  0.307484
C9   C   0.6572 0.0484 0.8042 0.01267  Uiso  1  0.668218
C10  C   0.5775 0.0223 0.6467 0.01267  Uiso  1  -0.167474
C11  C   0.4193 0.0803 0.6017 0.01267  Uiso  1  -0.219281
C12  C   0.6572 0.9394 0.542  0.01267  Uiso  1  0.307619
C13  C   0.8428 0.8042 0.0484 0.01267  Uiso  1  0.668071
C14  C   0.9225 0.6467 0.0223 0.01267  Uiso  1  -0.167455
C15  C   0.0807 0.6017 0.0803 0.01267  Uiso  1  -0.219352
C16  C   0.8428 0.542  0.9394 0.01267  Uiso  1  0.307577
O1   O   0.4198 0.9026 0.105  0.01267  Uiso  1  -0.698614

```

|     |   |        |        |        |         |      |   |           |
|-----|---|--------|--------|--------|---------|------|---|-----------|
| O2  | O | 0.1968 | 0.98   | 0.1642 | 0.01267 | Uiso | 1 | -0.716551 |
| O3  | O | 0.189  | 0.1259 | 0.4265 | 0.01267 | Uiso | 1 | -0.486384 |
| O4  | O | 0.0802 | 0.105  | 0.9026 | 0.01267 | Uiso | 1 | -0.698616 |
| O5  | O | 0.3032 | 0.1642 | 0.98   | 0.01267 | Uiso | 1 | -0.716736 |
| O6  | O | 0.311  | 0.4265 | 0.1259 | 0.01267 | Uiso | 1 | -0.486439 |
| O7  | O | 0.5802 | 0.0974 | 0.895  | 0.01267 | Uiso | 1 | -0.698431 |
| O8  | O | 0.8032 | 0.02   | 0.8358 | 0.01267 | Uiso | 1 | -0.716745 |
| O9  | O | 0.811  | 0.8741 | 0.5735 | 0.01267 | Uiso | 1 | -0.486668 |
| O10 | O | 0.9198 | 0.895  | 0.0974 | 0.01267 | Uiso | 1 | -0.698505 |
| O11 | O | 0.6968 | 0.8358 | 0.02   | 0.01267 | Uiso | 1 | -0.716489 |
| O12 | O | 0.689  | 0.5735 | 0.8741 | 0.01267 | Uiso | 1 | -0.486478 |

data\_WURKEB\_CLEAN

\_cell\_length\_a 18.2507  
\_cell\_length\_b 18.1651  
\_cell\_length\_c 18.8518  
\_cell\_angle\_alpha 90  
\_cell\_angle\_beta 90  
\_cell\_angle\_gamma 90

\_symmetry\_space\_group\_name\_H-M "P 1"  
\_symmetry\_int\_tables\_number 1

loop\_

\_symmetry\_equiv\_pos\_as\_xyz  
'x, y, z'

loop\_

\_atom\_site\_label  
\_atom\_site\_occupancy  
\_atom\_site\_fract\_x  
\_atom\_site\_fract\_y  
\_atom\_site\_fract\_z  
\_atom\_site\_thermal\_displace\_type  
\_atom\_site\_B\_iso\_or\_equiv  
\_atom\_site\_type\_symbol  
\_atom\_site\_charge

|     |   |         |         |         |      |   |    |           |
|-----|---|---------|---------|---------|------|---|----|-----------|
| Mn1 | 1 | 0.22371 | 0.69334 | 0.08938 | Biso | 1 | Mn | 1.013839  |
| Mn2 | 1 | 0.22053 | 0.4914  | 0.09417 | Biso | 1 | Mn | 0.979793  |
| O1  | 1 | 0.23449 | 0.38399 | 0.13491 | Biso | 1 | O  | -0.549909 |
| O2  | 1 | 0.31773 | 0.52377 | 0.14579 | Biso | 1 | O  | -0.526213 |
| O3  | 1 | 0.22958 | 0.50278 | 0.48788 | Biso | 1 | O  | -0.516116 |
| O4  | 1 | 0.64147 | 0.53542 | 0.33741 | Biso | 1 | O  | -0.579756 |
| O5  | 1 | 0.28815 | 0.4036  | 0.52109 | Biso | 1 | O  | -0.610949 |
| O6  | 1 | 0.63283 | 0.65704 | 0.34648 | Biso | 1 | O  | -0.53176  |
| O7  | 1 | 0.27644 | 0.27736 | 0.17102 | Biso | 1 | O  | -0.568203 |
| O8  | 1 | 0.31121 | 0.64584 | 0.14813 | Biso | 1 | O  | -0.577456 |
| O9  | 1 | 0.3162  | 0.25589 | 0.29935 | Biso | 1 | O  | -0.47933  |
| H1  | 1 | 0.3156  | 0.2476  | 0.2566  | Biso | 1 | H  | 0.392943  |
| O10 | 1 | 0.4147  | 0.7213  | 0.2004  | Biso | 1 | O  | -0.49004  |
| H2  | 1 | 0.3758  | 0.7137  | 0.1801  | Biso | 1 | H  | 0.386226  |
| C1  | 1 | 0.25382 | 0.34154 | 0.18274 | Biso | 1 | C  | 0.632451  |
| C2  | 1 | 0.25136 | 0.36426 | 0.25903 | Biso | 1 | C  | -0.179357 |
| C3  | 1 | 0.2167  | 0.42873 | 0.27816 | Biso | 1 | C  | -0.075849 |
| H3  | 1 | 0.1931  | 0.4565  | 0.2436  | Biso | 1 | H  | 0.114686  |
| C4  | 1 | 0.2163  | 0.45305 | 0.34828 | Biso | 1 | C  | -0.134654 |
| H4  | 1 | 0.193   | 0.4969  | 0.3602  | Biso | 1 | H  | 0.132027  |
| C5  | 1 | 0.2507  | 0.41174 | 0.39994 | Biso | 1 | C  | -0.005664 |
| C6  | 1 | 0.28366 | 0.34554 | 0.38221 | Biso | 1 | C  | -0.265808 |
| H5  | 1 | 0.3058  | 0.3172  | 0.4173  | Biso | 1 | H  | 0.137704  |
| C7  | 1 | 0.28382 | 0.32117 | 0.31219 | Biso | 1 | C  | 0.337367  |
| C8  | 1 | 0.25542 | 0.44009 | 0.47402 | Biso | 1 | C  | 0.583912  |
| C9  | 1 | 0.34118 | 0.58561 | 0.16266 | Biso | 1 | C  | 0.623885  |
| C10 | 1 | 0.4122  | 0.58928 | 0.20365 | Biso | 1 | C  | -0.183735 |

|     |   |         |         |         |      |   |    |           |
|-----|---|---------|---------|---------|------|---|----|-----------|
| C11 | 1 | 0.4454  | 0.5247  | 0.2266  | Biso | 1 | C  | -0.075203 |
| H6  | 1 | 0.424   | 0.4795  | 0.2162  | Biso | 1 | H  | 0.126062  |
| C12 | 1 | 0.5099  | 0.52706 | 0.2646  | Biso | 1 | C  | -0.148389 |
| H7  | 1 | 0.5317  | 0.4835  | 0.2796  | Biso | 1 | H  | 0.125096  |
| C13 | 1 | 0.54238 | 0.59439 | 0.28078 | Biso | 1 | C  | -0.005221 |
| C14 | 1 | 0.51002 | 0.6584  | 0.25786 | Biso | 1 | C  | -0.243183 |
| H8  | 1 | 0.5317  | 0.7035  | 0.2681  | Biso | 1 | H  | 0.150127  |
| C15 | 1 | 0.4451  | 0.65631 | 0.21948 | Biso | 1 | C  | 0.331185  |
| C16 | 1 | 0.61145 | 0.59602 | 0.32482 | Biso | 1 | C  | 0.618561  |
| Mn3 | 1 | 0.27629 | 0.30666 | 0.58938 | Biso | 1 | Mn | 1.026446  |
| Mn4 | 1 | 0.27947 | 0.5086  | 0.59417 | Biso | 1 | Mn | 1.082504  |
| O11 | 1 | 0.26551 | 0.61601 | 0.63491 | Biso | 1 | O  | -0.578413 |
| O12 | 1 | 0.18227 | 0.47623 | 0.64579 | Biso | 1 | O  | -0.553221 |
| O13 | 1 | 0.27042 | 0.49722 | 0.98788 | Biso | 1 | O  | -0.491544 |
| O14 | 1 | 0.85853 | 0.46458 | 0.83741 | Biso | 1 | O  | -0.553802 |
| O15 | 1 | 0.21185 | 0.5964  | 0.02109 | Biso | 1 | O  | -0.583349 |
| O16 | 1 | 0.86717 | 0.34296 | 0.84648 | Biso | 1 | O  | -0.535328 |
| O17 | 1 | 0.22356 | 0.72264 | 0.67102 | Biso | 1 | O  | -0.569003 |
| O18 | 1 | 0.18879 | 0.35416 | 0.64813 | Biso | 1 | O  | -0.583626 |
| O19 | 1 | 0.1838  | 0.74411 | 0.79935 | Biso | 1 | O  | -0.47871  |
| H9  | 1 | 0.1844  | 0.7524  | 0.7566  | Biso | 1 | H  | 0.392352  |
| O20 | 1 | 0.0853  | 0.2787  | 0.7004  | Biso | 1 | O  | -0.490818 |
| H10 | 1 | 0.1242  | 0.2863  | 0.6801  | Biso | 1 | H  | 0.385984  |
| C17 | 1 | 0.24618 | 0.65846 | 0.68274 | Biso | 1 | C  | 0.637272  |
| C18 | 1 | 0.24864 | 0.63574 | 0.75903 | Biso | 1 | C  | -0.180345 |
| C19 | 1 | 0.2833  | 0.57127 | 0.77816 | Biso | 1 | C  | -0.076094 |
| H11 | 1 | 0.3069  | 0.5435  | 0.7436  | Biso | 1 | H  | 0.113721  |
| C20 | 1 | 0.2837  | 0.54695 | 0.84828 | Biso | 1 | C  | -0.135321 |
| H12 | 1 | 0.307   | 0.5031  | 0.8602  | Biso | 1 | H  | 0.13185   |
| C21 | 1 | 0.2493  | 0.58826 | 0.89994 | Biso | 1 | C  | -0.00625  |
| C22 | 1 | 0.21634 | 0.65446 | 0.88221 | Biso | 1 | C  | -0.265472 |
| H13 | 1 | 0.1942  | 0.6828  | 0.9173  | Biso | 1 | H  | 0.137812  |
| C23 | 1 | 0.21618 | 0.67883 | 0.81219 | Biso | 1 | C  | 0.337701  |
| C24 | 1 | 0.24458 | 0.55991 | 0.97402 | Biso | 1 | C  | 0.575518  |
| C25 | 1 | 0.15882 | 0.41439 | 0.66266 | Biso | 1 | C  | 0.630022  |
| C26 | 1 | 0.0878  | 0.41072 | 0.70365 | Biso | 1 | C  | -0.18745  |
| C27 | 1 | 0.0546  | 0.4753  | 0.7266  | Biso | 1 | C  | -0.073601 |
| H14 | 1 | 0.076   | 0.5205  | 0.7162  | Biso | 1 | H  | 0.125596  |
| C28 | 1 | 0.9901  | 0.47294 | 0.7646  | Biso | 1 | C  | -0.14991  |
| H15 | 1 | 0.9683  | 0.5165  | 0.7796  | Biso | 1 | H  | 0.125159  |
| C29 | 1 | 0.95762 | 0.40561 | 0.78078 | Biso | 1 | C  | -0.003252 |
| C30 | 1 | 0.98998 | 0.3416  | 0.75786 | Biso | 1 | C  | -0.243808 |
| H16 | 1 | 0.9683  | 0.2965  | 0.7681  | Biso | 1 | H  | 0.14996   |
| C31 | 1 | 0.0549  | 0.34369 | 0.71948 | Biso | 1 | C  | 0.332017  |
| C32 | 1 | 0.88855 | 0.40398 | 0.82482 | Biso | 1 | C  | 0.613635  |
| Mn5 | 1 | 0.77629 | 0.19334 | 0.41062 | Biso | 1 | Mn | 1.027655  |
| Mn6 | 1 | 0.77947 | 0.9914  | 0.40583 | Biso | 1 | Mn | 0.990246  |
| O21 | 1 | 0.76551 | 0.88399 | 0.36509 | Biso | 1 | O  | -0.550918 |
| O22 | 1 | 0.68227 | 0.02377 | 0.35421 | Biso | 1 | O  | -0.524181 |
| O23 | 1 | 0.77042 | 0.00278 | 0.01212 | Biso | 1 | O  | -0.51688  |
| O24 | 1 | 0.35853 | 0.03542 | 0.16259 | Biso | 1 | O  | -0.582261 |
| O25 | 1 | 0.71185 | 0.9036  | 0.97891 | Biso | 1 | O  | -0.616998 |

|     |   |         |         |         |      |   |    |           |
|-----|---|---------|---------|---------|------|---|----|-----------|
| O26 | 1 | 0.36717 | 0.15704 | 0.15352 | Biso | 1 | O  | -0.543205 |
| O27 | 1 | 0.72356 | 0.77736 | 0.32898 | Biso | 1 | O  | -0.565799 |
| O28 | 1 | 0.68879 | 0.14584 | 0.35187 | Biso | 1 | O  | -0.582209 |
| O29 | 1 | 0.6838  | 0.75589 | 0.20065 | Biso | 1 | O  | -0.479276 |
| H17 | 1 | 0.6844  | 0.7476  | 0.2434  | Biso | 1 | H  | 0.392282  |
| O30 | 1 | 0.5853  | 0.2213  | 0.2996  | Biso | 1 | O  | -0.490669 |
| H18 | 1 | 0.6242  | 0.2137  | 0.3199  | Biso | 1 | H  | 0.385912  |
| C33 | 1 | 0.74618 | 0.84154 | 0.31726 | Biso | 1 | C  | 0.632798  |
| C34 | 1 | 0.74864 | 0.86426 | 0.24097 | Biso | 1 | C  | -0.180994 |
| C35 | 1 | 0.7833  | 0.92873 | 0.22184 | Biso | 1 | C  | -0.076631 |
| H19 | 1 | 0.8069  | 0.9565  | 0.2564  | Biso | 1 | H  | 0.114092  |
| C36 | 1 | 0.7837  | 0.95305 | 0.15172 | Biso | 1 | C  | -0.134358 |
| H20 | 1 | 0.807   | 0.9969  | 0.1398  | Biso | 1 | H  | 0.132298  |
| C37 | 1 | 0.7493  | 0.91174 | 0.10006 | Biso | 1 | C  | -0.003753 |
| C38 | 1 | 0.71634 | 0.84554 | 0.11779 | Biso | 1 | C  | -0.26499  |
| H21 | 1 | 0.6942  | 0.8172  | 0.0827  | Biso | 1 | H  | 0.138075  |
| C39 | 1 | 0.71618 | 0.82117 | 0.18781 | Biso | 1 | C  | 0.337462  |
| C40 | 1 | 0.74458 | 0.94009 | 0.02598 | Biso | 1 | C  | 0.585131  |
| C41 | 1 | 0.65882 | 0.08561 | 0.33734 | Biso | 1 | C  | 0.626294  |
| C42 | 1 | 0.5878  | 0.08928 | 0.29635 | Biso | 1 | C  | -0.186512 |
| C43 | 1 | 0.5546  | 0.0247  | 0.2734  | Biso | 1 | C  | -0.075635 |
| H22 | 1 | 0.576   | 0.9795  | 0.2838  | Biso | 1 | H  | 0.125608  |
| C44 | 1 | 0.4901  | 0.02706 | 0.2354  | Biso | 1 | C  | -0.148489 |
| H23 | 1 | 0.4683  | 0.9835  | 0.2204  | Biso | 1 | H  | 0.125073  |
| C45 | 1 | 0.45762 | 0.09439 | 0.21922 | Biso | 1 | C  | -0.003009 |
| C46 | 1 | 0.48998 | 0.1584  | 0.24214 | Biso | 1 | C  | -0.243662 |
| H24 | 1 | 0.4683  | 0.2035  | 0.2319  | Biso | 1 | H  | 0.150243  |
| C47 | 1 | 0.5549  | 0.15631 | 0.28052 | Biso | 1 | C  | 0.331737  |
| C48 | 1 | 0.38855 | 0.09602 | 0.17518 | Biso | 1 | C  | 0.617857  |
| Mn7 | 1 | 0.72371 | 0.80666 | 0.91062 | Biso | 1 | Mn | 1.033708  |
| Mn8 | 1 | 0.72053 | 0.0086  | 0.90583 | Biso | 1 | Mn | 1.080856  |
| O31 | 1 | 0.73449 | 0.11601 | 0.86509 | Biso | 1 | O  | -0.576591 |
| O32 | 1 | 0.81773 | 0.97623 | 0.85421 | Biso | 1 | O  | -0.555119 |
| O33 | 1 | 0.72958 | 0.99722 | 0.51212 | Biso | 1 | O  | -0.48989  |
| O34 | 1 | 0.14147 | 0.96458 | 0.66259 | Biso | 1 | O  | -0.551493 |
| O35 | 1 | 0.78815 | 0.0964  | 0.47891 | Biso | 1 | O  | -0.586717 |
| O36 | 1 | 0.13283 | 0.84296 | 0.65352 | Biso | 1 | O  | -0.531229 |
| O37 | 1 | 0.77644 | 0.22264 | 0.82898 | Biso | 1 | O  | -0.566996 |
| O38 | 1 | 0.81121 | 0.85416 | 0.85187 | Biso | 1 | O  | -0.594614 |
| O39 | 1 | 0.8162  | 0.24411 | 0.70065 | Biso | 1 | O  | -0.479212 |
| H25 | 1 | 0.8156  | 0.2524  | 0.7434  | Biso | 1 | H  | 0.392721  |
| O40 | 1 | 0.9147  | 0.7787  | 0.7996  | Biso | 1 | O  | -0.491763 |
| H26 | 1 | 0.8758  | 0.7863  | 0.8199  | Biso | 1 | H  | 0.385595  |
| C49 | 1 | 0.75382 | 0.15846 | 0.81726 | Biso | 1 | C  | 0.636162  |
| C50 | 1 | 0.75136 | 0.13574 | 0.74097 | Biso | 1 | C  | -0.178943 |
| C51 | 1 | 0.7167  | 0.07127 | 0.72184 | Biso | 1 | C  | -0.074708 |
| H27 | 1 | 0.6931  | 0.0435  | 0.7564  | Biso | 1 | H  | 0.114299  |
| C52 | 1 | 0.7163  | 0.04695 | 0.65172 | Biso | 1 | C  | -0.134676 |
| H28 | 1 | 0.693   | 0.0031  | 0.6398  | Biso | 1 | H  | 0.131932  |
| C53 | 1 | 0.7507  | 0.08826 | 0.60006 | Biso | 1 | C  | -0.007657 |
| C54 | 1 | 0.78366 | 0.15446 | 0.61779 | Biso | 1 | C  | -0.266014 |
| H29 | 1 | 0.8058  | 0.1828  | 0.5827  | Biso | 1 | H  | 0.137663  |

|      |   |         |         |         |      |   |    |           |
|------|---|---------|---------|---------|------|---|----|-----------|
| C55  | 1 | 0.78382 | 0.17883 | 0.68781 | Biso | 1 | C  | 0.337522  |
| C56  | 1 | 0.75542 | 0.05991 | 0.52598 | Biso | 1 | C  | 0.57708   |
| C57  | 1 | 0.84118 | 0.91439 | 0.83734 | Biso | 1 | C  | 0.629459  |
| C58  | 1 | 0.9122  | 0.91072 | 0.79635 | Biso | 1 | C  | -0.186826 |
| C59  | 1 | 0.9454  | 0.9753  | 0.7734  | Biso | 1 | C  | -0.073799 |
| H30  | 1 | 0.924   | 0.0205  | 0.7838  | Biso | 1 | H  | 0.125416  |
| C60  | 1 | 0.0099  | 0.97294 | 0.7354  | Biso | 1 | C  | -0.150227 |
| H31  | 1 | 0.0317  | 0.0165  | 0.7204  | Biso | 1 | H  | 0.124737  |
| C61  | 1 | 0.04238 | 0.90561 | 0.71922 | Biso | 1 | C  | -0.00556  |
| C62  | 1 | 0.01002 | 0.8416  | 0.74214 | Biso | 1 | C  | -0.243988 |
| H32  | 1 | 0.0317  | 0.7965  | 0.7319  | Biso | 1 | H  | 0.149489  |
| C63  | 1 | 0.9451  | 0.84369 | 0.78052 | Biso | 1 | C  | 0.332316  |
| C64  | 1 | 0.11145 | 0.90398 | 0.67518 | Biso | 1 | C  | 0.613737  |
| Mn9  | 1 | 0.77629 | 0.30666 | 0.91062 | Biso | 1 | Mn | 1.0135    |
| Mn10 | 1 | 0.77947 | 0.5086  | 0.90583 | Biso | 1 | Mn | 0.982368  |
| O41  | 1 | 0.76551 | 0.61601 | 0.86509 | Biso | 1 | O  | -0.548882 |
| O42  | 1 | 0.68227 | 0.47623 | 0.85421 | Biso | 1 | O  | -0.525583 |
| O43  | 1 | 0.77042 | 0.49722 | 0.51212 | Biso | 1 | O  | -0.516028 |
| O44  | 1 | 0.35853 | 0.46458 | 0.66259 | Biso | 1 | O  | -0.579575 |
| O45  | 1 | 0.71185 | 0.5964  | 0.47891 | Biso | 1 | O  | -0.610932 |
| O46  | 1 | 0.36717 | 0.34296 | 0.65352 | Biso | 1 | O  | -0.531742 |
| O47  | 1 | 0.72356 | 0.72264 | 0.82898 | Biso | 1 | O  | -0.563315 |
| O48  | 1 | 0.68879 | 0.35416 | 0.85187 | Biso | 1 | O  | -0.577337 |
| O49  | 1 | 0.6838  | 0.74411 | 0.70065 | Biso | 1 | O  | -0.47884  |
| H33  | 1 | 0.6844  | 0.7524  | 0.7434  | Biso | 1 | H  | 0.39294   |
| O50  | 1 | 0.5853  | 0.2787  | 0.7996  | Biso | 1 | O  | -0.490088 |
| H34  | 1 | 0.6242  | 0.2863  | 0.8199  | Biso | 1 | H  | 0.38647   |
| C65  | 1 | 0.74618 | 0.65846 | 0.81726 | Biso | 1 | C  | 0.632046  |
| C66  | 1 | 0.74864 | 0.63574 | 0.74097 | Biso | 1 | C  | -0.179994 |
| C67  | 1 | 0.7833  | 0.57127 | 0.72184 | Biso | 1 | C  | -0.07575  |
| H35  | 1 | 0.8069  | 0.5435  | 0.7564  | Biso | 1 | H  | 0.114659  |
| C68  | 1 | 0.7837  | 0.54695 | 0.65172 | Biso | 1 | C  | -0.134443 |
| H36  | 1 | 0.807   | 0.5031  | 0.6398  | Biso | 1 | H  | 0.132126  |
| C69  | 1 | 0.7493  | 0.58826 | 0.60006 | Biso | 1 | C  | -0.005335 |
| C70  | 1 | 0.71634 | 0.65446 | 0.61779 | Biso | 1 | C  | -0.265516 |
| H37  | 1 | 0.6942  | 0.6828  | 0.5827  | Biso | 1 | H  | 0.137809  |
| C71  | 1 | 0.71618 | 0.67883 | 0.68781 | Biso | 1 | C  | 0.337307  |
| C72  | 1 | 0.74458 | 0.55991 | 0.52598 | Biso | 1 | C  | 0.583941  |
| C73  | 1 | 0.65882 | 0.41439 | 0.83734 | Biso | 1 | C  | 0.62415   |
| C74  | 1 | 0.5878  | 0.41072 | 0.79635 | Biso | 1 | C  | -0.184412 |
| C75  | 1 | 0.5546  | 0.4753  | 0.7734  | Biso | 1 | C  | -0.075065 |
| H38  | 1 | 0.576   | 0.5205  | 0.7838  | Biso | 1 | H  | 0.126063  |
| C76  | 1 | 0.4901  | 0.47294 | 0.7354  | Biso | 1 | C  | -0.148248 |
| H39  | 1 | 0.4683  | 0.5165  | 0.7204  | Biso | 1 | H  | 0.12524   |
| C77  | 1 | 0.45762 | 0.40561 | 0.71922 | Biso | 1 | C  | -0.00481  |
| C78  | 1 | 0.48998 | 0.3416  | 0.74214 | Biso | 1 | C  | -0.243323 |
| H40  | 1 | 0.4683  | 0.2965  | 0.7319  | Biso | 1 | H  | 0.150103  |
| C79  | 1 | 0.5549  | 0.34369 | 0.78052 | Biso | 1 | C  | 0.331466  |
| C80  | 1 | 0.38855 | 0.40398 | 0.67518 | Biso | 1 | C  | 0.61838   |
| Mn11 | 1 | 0.72371 | 0.69334 | 0.41062 | Biso | 1 | Mn | 1.026431  |
| Mn12 | 1 | 0.72053 | 0.4914  | 0.40583 | Biso | 1 | Mn | 1.082289  |
| O51  | 1 | 0.73449 | 0.38399 | 0.36509 | Biso | 1 | O  | -0.57805  |

|      |   |         |         |         |      |   |    |           |
|------|---|---------|---------|---------|------|---|----|-----------|
| O52  | 1 | 0.81773 | 0.52377 | 0.35421 | Biso | 1 | O  | -0.55334  |
| O53  | 1 | 0.72958 | 0.50278 | 0.01212 | Biso | 1 | O  | -0.491991 |
| O54  | 1 | 0.14147 | 0.53542 | 0.16259 | Biso | 1 | O  | -0.553295 |
| O55  | 1 | 0.78815 | 0.4036  | 0.97891 | Biso | 1 | O  | -0.584306 |
| O56  | 1 | 0.13283 | 0.65704 | 0.15352 | Biso | 1 | O  | -0.53376  |
| O57  | 1 | 0.77644 | 0.27736 | 0.32898 | Biso | 1 | O  | -0.569203 |
| O58  | 1 | 0.81121 | 0.64584 | 0.35187 | Biso | 1 | O  | -0.583577 |
| O59  | 1 | 0.8162  | 0.25589 | 0.20065 | Biso | 1 | O  | -0.478784 |
| H41  | 1 | 0.8156  | 0.2476  | 0.2434  | Biso | 1 | H  | 0.392396  |
| O60  | 1 | 0.9147  | 0.7213  | 0.2996  | Biso | 1 | O  | -0.490721 |
| H42  | 1 | 0.8758  | 0.7137  | 0.3199  | Biso | 1 | H  | 0.385736  |
| C81  | 1 | 0.75382 | 0.34154 | 0.31726 | Biso | 1 | C  | 0.637297  |
| C82  | 1 | 0.75136 | 0.36426 | 0.24097 | Biso | 1 | C  | -0.180023 |
| C83  | 1 | 0.7167  | 0.42873 | 0.22184 | Biso | 1 | C  | -0.075794 |
| H43  | 1 | 0.6931  | 0.4565  | 0.2564  | Biso | 1 | H  | 0.113779  |
| C84  | 1 | 0.7163  | 0.45305 | 0.15172 | Biso | 1 | C  | -0.134818 |
| H44  | 1 | 0.693   | 0.4969  | 0.1398  | Biso | 1 | H  | 0.13202   |
| C85  | 1 | 0.7507  | 0.41174 | 0.10006 | Biso | 1 | C  | -0.006315 |
| C86  | 1 | 0.78366 | 0.34554 | 0.11779 | Biso | 1 | C  | -0.265239 |
| H45  | 1 | 0.8058  | 0.3172  | 0.0827  | Biso | 1 | H  | 0.138171  |
| C87  | 1 | 0.78382 | 0.32117 | 0.18781 | Biso | 1 | C  | 0.337703  |
| C88  | 1 | 0.75542 | 0.44009 | 0.02598 | Biso | 1 | C  | 0.576427  |
| C89  | 1 | 0.84118 | 0.58561 | 0.33734 | Biso | 1 | C  | 0.629964  |
| C90  | 1 | 0.9122  | 0.58928 | 0.29635 | Biso | 1 | C  | -0.187845 |
| C91  | 1 | 0.9454  | 0.5247  | 0.2734  | Biso | 1 | C  | -0.07354  |
| H46  | 1 | 0.924   | 0.4795  | 0.2838  | Biso | 1 | H  | 0.125262  |
| C92  | 1 | 0.0099  | 0.52706 | 0.2354  | Biso | 1 | C  | -0.150055 |
| H47  | 1 | 0.0317  | 0.4835  | 0.2204  | Biso | 1 | H  | 0.125218  |
| C93  | 1 | 0.04238 | 0.59439 | 0.21922 | Biso | 1 | C  | -0.002823 |
| C94  | 1 | 0.01002 | 0.6584  | 0.24214 | Biso | 1 | C  | -0.243897 |
| H48  | 1 | 0.0317  | 0.7035  | 0.2319  | Biso | 1 | H  | 0.150181  |
| C95  | 1 | 0.9451  | 0.65631 | 0.28052 | Biso | 1 | C  | 0.332149  |
| C96  | 1 | 0.11145 | 0.59602 | 0.17518 | Biso | 1 | C  | 0.612614  |
| Mn13 | 1 | 0.22371 | 0.80666 | 0.58938 | Biso | 1 | Mn | 1.026324  |
| Mn14 | 1 | 0.22053 | 0.0086  | 0.59417 | Biso | 1 | Mn | 0.983874  |
| O61  | 1 | 0.23449 | 0.11601 | 0.63491 | Biso | 1 | O  | -0.550736 |
| O62  | 1 | 0.31773 | 0.97623 | 0.64579 | Biso | 1 | O  | -0.524296 |
| O63  | 1 | 0.22958 | 0.99722 | 0.98788 | Biso | 1 | O  | -0.516889 |
| O64  | 1 | 0.64147 | 0.96458 | 0.83741 | Biso | 1 | O  | -0.582408 |
| O65  | 1 | 0.28815 | 0.0964  | 0.02109 | Biso | 1 | O  | -0.611688 |
| O66  | 1 | 0.63283 | 0.84296 | 0.84648 | Biso | 1 | O  | -0.542674 |
| O67  | 1 | 0.27644 | 0.22264 | 0.67102 | Biso | 1 | O  | -0.566426 |
| O68  | 1 | 0.31121 | 0.85416 | 0.64813 | Biso | 1 | O  | -0.58253  |
| O69  | 1 | 0.3162  | 0.24411 | 0.79935 | Biso | 1 | O  | -0.479711 |
| H49  | 1 | 0.3156  | 0.2524  | 0.7566  | Biso | 1 | H  | 0.392374  |
| O70  | 1 | 0.4147  | 0.7787  | 0.7004  | Biso | 1 | O  | -0.490961 |
| H50  | 1 | 0.3758  | 0.7863  | 0.6801  | Biso | 1 | H  | 0.385927  |
| C97  | 1 | 0.25382 | 0.15846 | 0.68274 | Biso | 1 | C  | 0.632194  |
| C98  | 1 | 0.25136 | 0.13574 | 0.75903 | Biso | 1 | C  | -0.180776 |
| C99  | 1 | 0.2167  | 0.07127 | 0.77816 | Biso | 1 | C  | -0.076413 |
| H51  | 1 | 0.1931  | 0.0435  | 0.7436  | Biso | 1 | H  | 0.114283  |
| C100 | 1 | 0.2163  | 0.04695 | 0.84828 | Biso | 1 | C  | -0.134662 |

|      |   |         |         |         |         |         |      |           |           |           |           |
|------|---|---------|---------|---------|---------|---------|------|-----------|-----------|-----------|-----------|
| H52  | 1 | 0.193   | 0.0031  | 0.8602  | Biso    | 1       | H    | 0.132113  |           |           |           |
| C101 | 1 | 0.2507  | 0.08826 |         | 0.89994 |         | Biso | 1         | C         | -0.004339 |           |
| C102 | 1 | 0.28366 |         | 0.15446 |         | 0.88221 |      | Biso      | 1         | C         | -0.265522 |
| H53  | 1 | 0.3058  | 0.1828  | 0.9173  | Biso    | 1       | H    | 0.138177  |           |           |           |
| C103 | 1 | 0.28382 |         | 0.17883 |         | 0.81219 |      | Biso      | 1         | C         | 0.337176  |
| C104 | 1 | 0.25542 |         | 0.05991 |         | 0.97402 |      | Biso      | 1         | C         | 0.582202  |
| C105 | 1 | 0.34118 |         | 0.91439 |         | 0.66266 |      | Biso      | 1         | C         | 0.625769  |
| C106 | 1 | 0.4122  | 0.91072 |         | 0.70365 |         | Biso | 1         | C         | -0.186045 |           |
| C107 | 1 | 0.4454  | 0.9753  | 0.7266  | Biso    | 1       | C    | -0.075564 |           |           |           |
| H54  | 1 | 0.424   | 0.0205  | 0.7162  | Biso    | 1       | H    | 0.125673  |           |           |           |
| C108 | 1 | 0.5099  | 0.97294 |         | 0.7646  | Biso    | 1    | C         | -0.148854 |           |           |
| H55  | 1 | 0.5317  | 0.0165  | 0.7796  | Biso    | 1       | H    | 0.125142  |           |           |           |
| C109 | 1 | 0.54238 |         | 0.90561 |         | 0.78078 |      | Biso      | 1         | C         | -0.003501 |
| C110 | 1 | 0.51002 |         | 0.8416  | 0.75786 |         | Biso | 1         | C         | -0.243724 |           |
| H56  | 1 | 0.5317  | 0.7965  | 0.7681  | Biso    | 1       | H    | 0.149963  |           |           |           |
| C111 | 1 | 0.4451  | 0.84369 |         | 0.71948 |         | Biso | 1         | C         | 0.331515  |           |
| C112 | 1 | 0.61145 |         | 0.90398 |         | 0.82482 |      | Biso      | 1         | C         | 0.618962  |
| Mn15 | 1 | 0.27629 |         | 0.19334 |         | 0.08938 |      | Biso      | 1         | Mn        | 1.039244  |
| Mn16 | 1 | 0.27947 |         | 0.9914  | 0.09417 |         | Biso | 1         | Mn        | 1.080731  |           |
| O71  | 1 | 0.26551 |         | 0.88399 |         | 0.13491 |      | Biso      | 1         | O         | -0.576995 |
| O72  | 1 | 0.18227 |         | 0.02377 |         | 0.14579 |      | Biso      | 1         | O         | -0.555337 |
| O73  | 1 | 0.27042 |         | 0.00278 |         | 0.48788 |      | Biso      | 1         | O         | -0.49053  |
| O74  | 1 | 0.85853 |         | 0.03542 |         | 0.33741 |      | Biso      | 1         | O         | -0.551221 |
| O75  | 1 | 0.21185 |         | 0.9036  | 0.52109 |         | Biso | 1         | O         | -0.587114 |           |
| O76  | 1 | 0.86717 |         | 0.15704 |         | 0.34648 |      | Biso      | 1         | O         | -0.53054  |
| O77  | 1 | 0.22356 |         | 0.77736 |         | 0.17102 |      | Biso      | 1         | O         | -0.568202 |
| O78  | 1 | 0.18879 |         | 0.14584 |         | 0.14813 |      | Biso      | 1         | O         | -0.597264 |
| O79  | 1 | 0.1838  | 0.75589 |         | 0.29935 |         | Biso | 1         | O         | -0.479631 |           |
| H57  | 1 | 0.1844  | 0.7476  | 0.2566  | Biso    | 1       | H    | 0.392688  |           |           |           |
| O80  | 1 | 0.0853  | 0.2213  | 0.2004  | Biso    | 1       | O    | -0.491236 |           |           |           |
| H58  | 1 | 0.1242  | 0.2137  | 0.1801  | Biso    | 1       | H    | 0.386274  |           |           |           |
| C113 | 1 | 0.24618 |         | 0.84154 |         | 0.18274 |      | Biso      | 1         | C         | 0.636672  |
| C114 | 1 | 0.24864 |         | 0.86426 |         | 0.25903 |      | Biso      | 1         | C         | -0.179608 |
| C115 | 1 | 0.2833  | 0.92873 |         | 0.27816 |         | Biso | 1         | C         | -0.074957 |           |
| H59  | 1 | 0.3069  | 0.9565  | 0.2436  | Biso    | 1       | H    | 0.114318  |           |           |           |
| C116 | 1 | 0.2837  | 0.95305 |         | 0.34828 |         | Biso | 1         | C         | -0.135131 |           |
| H60  | 1 | 0.307   | 0.9969  | 0.3602  | Biso    | 1       | H    | 0.132048  |           |           |           |
| C117 | 1 | 0.2493  | 0.91174 |         | 0.39994 |         | Biso | 1         | C         | -0.007141 |           |
| C118 | 1 | 0.21634 |         | 0.84554 |         | 0.38221 |      | Biso      | 1         | C         | -0.266433 |
| H61  | 1 | 0.1942  | 0.8172  | 0.4173  | Biso    | 1       | H    | 0.137595  |           |           |           |
| C119 | 1 | 0.21618 |         | 0.82117 |         | 0.31219 |      | Biso      | 1         | C         | 0.337789  |
| C120 | 1 | 0.24458 |         | 0.94009 |         | 0.47402 |      | Biso      | 1         | C         | 0.576723  |
| C121 | 1 | 0.15882 |         | 0.08561 |         | 0.16266 |      | Biso      | 1         | C         | 0.630304  |
| C122 | 1 | 0.0878  | 0.08928 |         | 0.20365 |         | Biso | 1         | C         | -0.185851 |           |
| C123 | 1 | 0.0546  | 0.0247  | 0.2266  | Biso    | 1       | C    | -0.073648 |           |           |           |
| H62  | 1 | 0.076   | 0.9795  | 0.2162  | Biso    | 1       | H    | 0.125593  |           |           |           |
| C124 | 1 | 0.9901  | 0.02706 |         | 0.2646  | Biso    | 1    | C         | -0.149907 |           |           |
| H63  | 1 | 0.9683  | 0.9835  | 0.2796  | Biso    | 1       | H    | 0.12448   |           |           |           |
| C125 | 1 | 0.95762 |         | 0.09439 |         | 0.28078 |      | Biso      | 1         | C         | -0.005901 |
| C126 | 1 | 0.98998 |         | 0.1584  | 0.25786 |         | Biso | 1         | C         | -0.243924 |           |
| H64  | 1 | 0.9683  | 0.2035  | 0.2681  | Biso    | 1       | H    | 0.149532  |           |           |           |
| C127 | 1 | 0.0549  | 0.15631 |         | 0.21948 |         | Biso | 1         | C         | 0.332558  |           |

C128 1 0.88855 0.09602 0.32482 Biso 1 C 0.614157

```

data_LIXWAR_clean
_audit_creation_date      2014-07-02
_audit_creation_method    'Materials Studio'
_symmetry_space_group_name_H-M  'P1'
_symmetry_Int_Tables_number  1
_symmetry_cell_setting    triclinic
loop_
_symmetry_equiv_pos_as_xyz
  x,y,z
_cell_length_a            11.2232
_cell_length_b            11.2232
_cell_length_c            21.2550
_cell_angle_alpha         95.8060
_cell_angle_beta          95.8060
_cell_angle_gamma         106.9850
loop_
_atom_site_label
_atom_site_type_symbol
_atom_site_fract_x
_atom_site_fract_y
_atom_site_fract_z
_atom_site_U_iso_or_equiv
_atom_site_adp_type
_atom_site_occupancy
_atom_site_charge
Mn1  Mn   0.00036 0.48284 0.1921 0.01267 Uiso  1  0.959748
Mn2  Mn   0.51716 0.99964 0.3079 0.01267 Uiso  1  1.079412
Mn3  Mn   0.99964 0.51716 0.8079 0.01267 Uiso  1  0.950307
Mn4  Mn   0.48284 0.00036 0.6921 0.01267 Uiso  1  0.925324
Mn5  Mn   0.74737 0.25263 0.25  0.01267 Uiso  1  1.124756
Mn6  Mn   0.25263 0.74737 0.75  0.01267 Uiso  1  1.050599
H1   H    0.7565 0.4697 0.4934 0.01267 Uiso  1  0.107285
H2   H    0.8482 0.4522 0.391  0.01267 Uiso  1  0.127601
H3   H    0.7674 0.9804 0.0945 0.01267 Uiso  1  0.111784
H4   H    0.7768 0.844  0.0092 0.01267 Uiso  1  0.119104
H5   H    0.1051 0.2135 0.0769 0.01267 Uiso  1  0.125337
H6   H    0.6706 0.5636 0.9225 0.01267 Uiso  1  0.126319
H7   H    0.7375 0.5089 0.0287 0.01267 Uiso  1  0.130964
H8   H    0.2187 0.5053 0.3976 0.01267 Uiso  1  0.122577
H9   H    0.4826 0.4036 0.1473 0.01267 Uiso  1  0.128718
H10  H    0.5303 0.2435 0.0066 0.01267 Uiso  1  0.10575
H11  H    0.5478 0.1518 0.109  0.01267 Uiso  1  0.126772
H12  H    0.0196 0.2326 0.4055 0.01267 Uiso  1  0.109852
H13  H    0.156  0.2232 0.4908 0.01267 Uiso  1  0.118018
H14  H    0.7865 0.8949 0.4231 0.01267 Uiso  1  0.124067
H15  H    0.4364 0.3294 0.5775 0.01267 Uiso  1  0.12694
H16  H    0.4911 0.2625 0.4713 0.01267 Uiso  1  0.131435
H17  H    0.4947 0.7813 0.1024 0.01267 Uiso  1  0.121779
H18  H    0.5964 0.5174 0.3527 0.01267 Uiso  1  0.128338
H19  H    0.2435 0.5303 0.5066 0.01267 Uiso  1  0.106771
H20  H    0.1518 0.5478 0.609  0.01267 Uiso  1  0.126845

```

|     |   |        |        |         |         |      |   |           |
|-----|---|--------|--------|---------|---------|------|---|-----------|
| H21 | H | 0.2326 | 0.0196 | 0.9055  | 0.01267 | Uiso | 1 | 0.111989  |
| H22 | H | 0.2232 | 0.156  | 0.9908  | 0.01267 | Uiso | 1 | 0.119533  |
| H23 | H | 0.8949 | 0.7865 | 0.9231  | 0.01267 | Uiso | 1 | 0.125308  |
| H24 | H | 0.3294 | 0.4364 | 0.0775  | 0.01267 | Uiso | 1 | 0.126198  |
| H25 | H | 0.2625 | 0.4911 | 0.9713  | 0.01267 | Uiso | 1 | 0.131056  |
| H26 | H | 0.7813 | 0.4947 | 0.6024  | 0.01267 | Uiso | 1 | 0.122456  |
| H27 | H | 0.5174 | 0.5964 | 0.8527  | 0.01267 | Uiso | 1 | 0.128718  |
| H28 | H | 0.4697 | 0.7565 | 0.9934  | 0.01267 | Uiso | 1 | 0.105468  |
| H29 | H | 0.4522 | 0.8482 | 0.891   | 0.01267 | Uiso | 1 | 0.125596  |
| H30 | H | 0.9804 | 0.7674 | 0.5945  | 0.01267 | Uiso | 1 | 0.109748  |
| H31 | H | 0.844  | 0.7768 | 0.5092  | 0.01267 | Uiso | 1 | 0.117901  |
| H32 | H | 0.2135 | 0.1051 | 0.5769  | 0.01267 | Uiso | 1 | 0.125198  |
| H33 | H | 0.5636 | 0.6706 | 0.4225  | 0.01267 | Uiso | 1 | 0.125709  |
| H34 | H | 0.5089 | 0.7375 | 0.5287  | 0.01267 | Uiso | 1 | 0.131268  |
| H35 | H | 0.5053 | 0.2187 | 0.8976  | 0.01267 | Uiso | 1 | 0.121435  |
| H36 | H | 0.4036 | 0.4826 | 0.6473  | 0.01267 | Uiso | 1 | 0.128203  |
| C1  | C | 0.9395 | 0.4881 | 0.48252 | 0.01267 | Uiso | 1 | 0.085226  |
| C2  | C | 0.9505 | 0.9445 | 0.98965 | 0.01267 | Uiso | 1 | 0.082361  |
| C3  | C | 0.0162 | 0.4648 | 0.31263 | 0.01267 | Uiso | 1 | 0.588671  |
| C4  | C | 0.8358 | 0.4836 | 0.5161  | 0.01267 | Uiso | 1 | -0.136921 |
| C5  | C | 0.9272 | 0.4698 | 0.41459 | 0.01267 | Uiso | 1 | -0.154561 |
| C6  | C | 0.8376 | 0.9994 | 0.0731  | 0.01267 | Uiso | 1 | -0.111277 |
| C7  | C | 0.0283 | 0.4773 | 0.38374 | 0.01267 | Uiso | 1 | -0.014626 |
| C8  | C | 0.843  | 0.9174 | 0.0224  | 0.01267 | Uiso | 1 | -0.149937 |
| C9  | C | 0.7229 | 0.4219 | 0.1395  | 0.01267 | Uiso | 1 | 0.597631  |
| C10 | C | 0.9243 | 0.2041 | 0.1481  | 0.01267 | Uiso | 1 | 0.614866  |
| C11 | C | 0.0399 | 0.1393 | 0.063   | 0.01267 | Uiso | 1 | -0.178659 |
| C12 | C | 0.9348 | 0.1116 | 0.09377 | 0.01267 | Uiso | 1 | -0.02335  |
| C13 | C | 0.5898 | 0.5506 | 0.9332  | 0.01267 | Uiso | 1 | -0.147026 |
| C14 | C | 0.6554 | 0.4926 | 0.0378  | 0.01267 | Uiso | 1 | -0.174293 |
| C15 | C | 0.1495 | 0.5007 | 0.4189  | 0.01267 | Uiso | 1 | -0.118364 |
| C16 | C | 0.5617 | 0.5113 | 0.9924  | 0.01267 | Uiso | 1 | 0.082748  |
| C17 | C | 0.6263 | 0.4513 | 0.0941  | 0.01267 | Uiso | 1 | -0.019619 |
| C18 | C | 0.5022 | 0.4306 | 0.1086  | 0.01267 | Uiso | 1 | -0.109595 |
| C19 | C | 0.5119 | 0.0605 | 0.01748 | 0.01267 | Uiso | 1 | 0.081711  |
| C20 | C | 0.0555 | 0.0495 | 0.51035 | 0.01267 | Uiso | 1 | 0.082582  |
| C21 | C | 0.5352 | 0.9838 | 0.18737 | 0.01267 | Uiso | 1 | 0.592249  |
| C22 | C | 0.5164 | 0.1642 | 0.9839  | 0.01267 | Uiso | 1 | -0.140865 |
| C23 | C | 0.5302 | 0.0728 | 0.08541 | 0.01267 | Uiso | 1 | -0.156438 |
| C24 | C | 0.0006 | 0.1624 | 0.4269  | 0.01267 | Uiso | 1 | -0.112586 |
| C25 | C | 0.5227 | 0.9717 | 0.11626 | 0.01267 | Uiso | 1 | -0.01847  |
| C26 | C | 0.0826 | 0.157  | 0.4776  | 0.01267 | Uiso | 1 | -0.153567 |
| C27 | C | 0.5781 | 0.2771 | 0.3605  | 0.01267 | Uiso | 1 | 0.601682  |
| C28 | C | 0.7959 | 0.0757 | 0.3519  | 0.01267 | Uiso | 1 | 0.619973  |
| C29 | C | 0.8607 | 0.9601 | 0.437   | 0.01267 | Uiso | 1 | -0.178638 |
| C30 | C | 0.8884 | 0.0652 | 0.40623 | 0.01267 | Uiso | 1 | -0.029452 |
| C31 | C | 0.4494 | 0.4102 | 0.5668  | 0.01267 | Uiso | 1 | -0.14753  |
| C32 | C | 0.5074 | 0.3446 | 0.4622  | 0.01267 | Uiso | 1 | -0.172964 |
| C33 | C | 0.4993 | 0.8505 | 0.0811  | 0.01267 | Uiso | 1 | -0.119313 |
| C34 | C | 0.4887 | 0.4383 | 0.5076  | 0.01267 | Uiso | 1 | 0.081168  |
| C35 | C | 0.5487 | 0.3737 | 0.4059  | 0.01267 | Uiso | 1 | -0.022286 |
| C36 | C | 0.5694 | 0.4978 | 0.3914  | 0.01267 | Uiso | 1 | -0.110894 |

|     |   |         |         |         |         |      |   |           |
|-----|---|---------|---------|---------|---------|------|---|-----------|
| C37 | C | 0.0605  | 0.5119  | 0.51748 | 0.01267 | Uiso | 1 | 0.083556  |
| C38 | C | 0.0495  | 0.0555  | 0.01035 | 0.01267 | Uiso | 1 | 0.082118  |
| C39 | C | 0.9838  | 0.5352  | 0.68737 | 0.01267 | Uiso | 1 | 0.589758  |
| C40 | C | 0.1642  | 0.5164  | 0.4839  | 0.01267 | Uiso | 1 | -0.137717 |
| C41 | C | 0.0728  | 0.5302  | 0.58541 | 0.01267 | Uiso | 1 | -0.153285 |
| C42 | C | 0.1624  | 0.0006  | 0.9269  | 0.01267 | Uiso | 1 | -0.113435 |
| C43 | C | 0.9717  | 0.5227  | 0.61626 | 0.01267 | Uiso | 1 | -0.019432 |
| C44 | C | 0.157   | 0.0826  | 0.9776  | 0.01267 | Uiso | 1 | -0.147973 |
| C45 | C | 0.2771  | 0.5781  | 0.8605  | 0.01267 | Uiso | 1 | 0.595592  |
| C46 | C | 0.0757  | 0.7959  | 0.8519  | 0.01267 | Uiso | 1 | 0.609926  |
| C47 | C | 0.9601  | 0.8607  | 0.937   | 0.01267 | Uiso | 1 | -0.17712  |
| C48 | C | 0.0652  | 0.8884  | 0.90623 | 0.01267 | Uiso | 1 | -0.025688 |
| C49 | C | 0.4102  | 0.4494  | 0.0668  | 0.01267 | Uiso | 1 | -0.148976 |
| C50 | C | 0.3446  | 0.5074  | 0.9622  | 0.01267 | Uiso | 1 | -0.172206 |
| C51 | C | 0.8505  | 0.4993  | 0.5811  | 0.01267 | Uiso | 1 | -0.118187 |
| C52 | C | 0.4383  | 0.4887  | 0.0076  | 0.01267 | Uiso | 1 | 0.082365  |
| C53 | C | 0.3737  | 0.5487  | 0.9059  | 0.01267 | Uiso | 1 | -0.021686 |
| C54 | C | 0.4978  | 0.5694  | 0.8914  | 0.01267 | Uiso | 1 | -0.112572 |
| C55 | C | 0.4881  | 0.9395  | 0.98252 | 0.01267 | Uiso | 1 | 0.084226  |
| C56 | C | 0.9445  | 0.9505  | 0.48965 | 0.01267 | Uiso | 1 | 0.08023   |
| C57 | C | 0.4648  | 0.0162  | 0.81263 | 0.01267 | Uiso | 1 | 0.581714  |
| C58 | C | 0.4836  | 0.8358  | 0.0161  | 0.01267 | Uiso | 1 | -0.142792 |
| C59 | C | 0.4698  | 0.9272  | 0.91459 | 0.01267 | Uiso | 1 | -0.162688 |
| C60 | C | 0.9994  | 0.8376  | 0.5731  | 0.01267 | Uiso | 1 | -0.117578 |
| C61 | C | 0.4773  | 0.0283  | 0.88374 | 0.01267 | Uiso | 1 | -0.015857 |
| C62 | C | 0.9174  | 0.843   | 0.5224  | 0.01267 | Uiso | 1 | -0.150489 |
| C63 | C | 0.4219  | 0.7229  | 0.6395  | 0.01267 | Uiso | 1 | 0.59112   |
| C64 | C | 0.2041  | 0.9243  | 0.6481  | 0.01267 | Uiso | 1 | 0.602057  |
| C65 | C | 0.1393  | 0.0399  | 0.563   | 0.01267 | Uiso | 1 | -0.181879 |
| C66 | C | 0.1116  | 0.9348  | 0.59377 | 0.01267 | Uiso | 1 | -0.022735 |
| C67 | C | 0.5506  | 0.5898  | 0.4332  | 0.01267 | Uiso | 1 | -0.150429 |
| C68 | C | 0.4926  | 0.6554  | 0.5378  | 0.01267 | Uiso | 1 | -0.174506 |
| C69 | C | 0.5007  | 0.1495  | 0.9189  | 0.01267 | Uiso | 1 | -0.120507 |
| C70 | C | 0.5113  | 0.5617  | 0.4924  | 0.01267 | Uiso | 1 | 0.082344  |
| C71 | C | 0.4513  | 0.6263  | 0.5941  | 0.01267 | Uiso | 1 | -0.021453 |
| C72 | C | 0.4306  | 0.5022  | 0.6086  | 0.01267 | Uiso | 1 | -0.114368 |
| O1  | O | 0.90812 | 0.42148 | 0.27969 | 0.01267 | Uiso | 1 | -0.569319 |
| O2  | O | 0.0105  | 0.3069  | 0.15941 | 0.01267 | Uiso | 1 | -0.55831  |
| O3  | O | 0.83236 | 0.17064 | 0.17776 | 0.01267 | Uiso | 1 | -0.561033 |
| O4  | O | 0.112   | 0.5052  | 0.28674 | 0.01267 | Uiso | 1 | -0.520801 |
| O5  | O | 0.8355  | 0.4579  | 0.12953 | 0.01267 | Uiso | 1 | -0.558645 |
| O6  | O | 0.6821  | 0.3605  | 0.18351 | 0.01267 | Uiso | 1 | -0.551533 |
| O7  | O | 0.57852 | 0.09188 | 0.22031 | 0.01267 | Uiso | 1 | -0.59785  |
| O8  | O | 0.6931  | 0.9895  | 0.34059 | 0.01267 | Uiso | 1 | -0.595183 |
| O9  | O | 0.82936 | 0.16764 | 0.32224 | 0.01267 | Uiso | 1 | -0.568318 |
| O10 | O | 0.4948  | 0.888   | 0.21326 | 0.01267 | Uiso | 1 | -0.541835 |
| O11 | O | 0.5421  | 0.1645  | 0.37047 | 0.01267 | Uiso | 1 | -0.586751 |
| O12 | O | 0.6395  | 0.3179  | 0.31649 | 0.01267 | Uiso | 1 | -0.555111 |
| O13 | O | 0.09188 | 0.57852 | 0.72031 | 0.01267 | Uiso | 1 | -0.553994 |
| O14 | O | 0.9895  | 0.6931  | 0.84059 | 0.01267 | Uiso | 1 | -0.548306 |
| O15 | O | 0.16764 | 0.82936 | 0.82224 | 0.01267 | Uiso | 1 | -0.52066  |
| O16 | O | 0.888   | 0.4948  | 0.71326 | 0.01267 | Uiso | 1 | -0.512109 |

|     |   |         |         |         |         |      |   |           |
|-----|---|---------|---------|---------|---------|------|---|-----------|
| O17 | O | 0.1645  | 0.5421  | 0.87047 | 0.01267 | Uiso | 1 | -0.555578 |
| O18 | O | 0.3179  | 0.6395  | 0.81649 | 0.01267 | Uiso | 1 | -0.515193 |
| O19 | O | 0.42148 | 0.90812 | 0.77969 | 0.01267 | Uiso | 1 | -0.572732 |
| O20 | O | 0.3069  | 0.0105  | 0.65941 | 0.01267 | Uiso | 1 | -0.560512 |
| O21 | O | 0.17064 | 0.83236 | 0.67776 | 0.01267 | Uiso | 1 | -0.530104 |
| O22 | O | 0.5052  | 0.112   | 0.78674 | 0.01267 | Uiso | 1 | -0.520345 |
| O23 | O | 0.4579  | 0.8355  | 0.62953 | 0.01267 | Uiso | 1 | -0.548873 |
| O24 | O | 0.3605  | 0.6821  | 0.68351 | 0.01267 | Uiso | 1 | -0.520174 |

data\_ZEFIV\_CLEAN

\_cell\_length\_a 22.839  
\_cell\_length\_b 22.839  
\_cell\_length\_c 33.078  
\_cell\_angle\_alpha 90  
\_cell\_angle\_beta 90  
\_cell\_angle\_gamma 90

\_symmetry\_space\_group\_name\_H-M "P 1"  
\_symmetry\_int\_tables\_number 1

loop\_

\_symmetry\_equiv\_pos\_as\_xyz  
'x, y, z'

loop\_

\_atom\_site\_label  
\_atom\_site\_occupancy  
\_atom\_site\_fract\_x  
\_atom\_site\_fract\_y  
\_atom\_site\_fract\_z  
\_atom\_site\_thermal\_displace\_type  
\_atom\_site\_B\_iso\_or\_equiv  
\_atom\_site\_type\_symbol  
\_atom\_site\_charge

|     |   |         |         |         |      |   |    |                    |
|-----|---|---------|---------|---------|------|---|----|--------------------|
| Zn1 | 1 | 0.42361 | 0.041   | 0.60736 | Biso | 1 | Zn | 0.9261389999999999 |
| Na1 | 1 | 0.46916 | 0.93363 | 0.55716 | Biso | 1 | Na | 0.844583           |
| Na2 | 1 | 0.46039 | 0.89118 | 0.4572  | Biso | 1 | Na | 0.842158           |
| C1  | 1 | 0.8064  | 0.2693  | 0.34576 | Biso | 1 | C  | 0.010946           |
| C2  | 1 | 0.774   | 0.272   | 0.38337 | Biso | 1 | C  | -0.214167          |
| H1  | 1 | 0.7387  | 0.2524  | 0.3866  | Biso | 1 | H  | 0.138074           |
| C3  | 1 | 0.7983  | 0.3055  | 0.41451 | Biso | 1 | C  | 0.278736           |
| C4  | 1 | 0.8515  | 0.3338  | 0.40965 | Biso | 1 | C  | -0.213962          |
| H2  | 1 | 0.8667  | 0.3562  | 0.4307  | Biso | 1 | H  | 0.12112            |
| C5  | 1 | 0.8827  | 0.3291  | 0.3734  | Biso | 1 | C  | 0.016832           |
| C6  | 1 | 0.8589  | 0.2987  | 0.34205 | Biso | 1 | C  | -0.13027           |
| H3  | 1 | 0.8786  | 0.2978  | 0.3175  | Biso | 1 | H  | 0.142754           |
| C7  | 1 | 0.51093 | 0.08855 | 0.50124 | Biso | 1 | C  | 0.017076           |
| C8  | 1 | 0.5529  | 0.1309  | 0.49456 | Biso | 1 | C  | -0.210313          |
| H4  | 1 | 0.5641  | 0.1558  | 0.5154  | Biso | 1 | H  | 0.133072           |
| C9  | 1 | 0.5782  | 0.1364  | 0.4572  | Biso | 1 | C  | 0.267799           |
| C10 | 1 | 0.5609  | 0.0965  | 0.42599 | Biso | 1 | C  | -0.188695          |
| H5  | 1 | 0.5789  | 0.0984  | 0.4008  | Biso | 1 | H  | 0.147318           |
| C11 | 1 | 0.51774 | 0.05533 | 0.43282 | Biso | 1 | C  | 0.012062           |
| C12 | 1 | 0.49352 | 0.05167 | 0.47017 | Biso | 1 | C  | -0.126217          |
| H6  | 1 | 0.4646  | 0.0239  | 0.475   | Biso | 1 | H  | 0.119278           |
| C13 | 1 | 0.50164 | 0.01575 | 0.39858 | Biso | 1 | C  | 0.58995            |
| C14 | 1 | 0.48526 | 0.0851  | 0.544   | Biso | 1 | C  | 0.581781           |
| C15 | 1 | 0.93992 | 0.3619  | 0.36769 | Biso | 1 | C  | 0.607516           |
| C16 | 1 | 0.779   | 0.2365  | 0.31096 | Biso | 1 | C  | 0.551987           |
| C17 | 1 | 0.7259  | 0.2811  | 0.46992 | Biso | 1 | C  | 0.539697           |
| C18 | 1 | 0.6556  | 0.2133  | 0.46964 | Biso | 1 | C  | 0.553218           |

|     |   |         |         |         |      |   |    |           |  |
|-----|---|---------|---------|---------|------|---|----|-----------|--|
| C19 | 1 | 0.6772  | 0.2613  | 0.52704 | Biso | 1 | C  | 0.554937  |  |
| C20 | 1 | 0.8303  | 0.3905  | 0.61522 | Biso | 1 | C  | 0.605622  |  |
| C21 | 1 | 0.7683  | 0.3654  | 0.61989 | Biso | 1 | C  | 0.013854  |  |
| C22 | 1 | 0.7328  | 0.3825  | 0.65429 | Biso | 1 | C  | -0.139596 |  |
| H7  | 1 | 0.7491  | 0.4053  | 0.6747  | Biso | 1 | H  | 0.154563  |  |
| C23 | 1 | 0.6783  | 0.3661  | 0.6567  | Biso | 1 | C  | -0.007911 |  |
| C24 | 1 | 0.7434  | 0.3315  | 0.59094 | Biso | 1 | C  | -0.220319 |  |
| H8  | 1 | 0.7657  | 0.3228  | 0.5682  | Biso | 1 | H  | 0.133777  |  |
| C25 | 1 | 0.6551  | 0.3318  | 0.6236  | Biso | 1 | C  | -0.20958  |  |
| H9  | 1 | 0.615   | 0.3249  | 0.6233  | Biso | 1 | H  | 0.131118  |  |
| C26 | 1 | 0.6873  | 0.3088  | 0.59284 | Biso | 1 | C  | 0.288064  |  |
| C27 | 1 | 0.6346  | 0.3845  | 0.6884  | Biso | 1 | C  | 0.479101  |  |
| N1  | 1 | 0.7729  | 0.3102  | 0.4532  | Biso | 1 | N  | -0.367965 |  |
| H10 | 1 | 0.7894  | 0.3352  | 0.4689  | Biso | 1 | H  | 0.310021  |  |
| N2  | 1 | 0.718   | 0.2934  | 0.50997 | Biso | 1 | N  | -0.5074   |  |
| N3  | 1 | 0.6984  | 0.2404  | 0.44836 | Biso | 1 | N  | -0.50524  |  |
| N4  | 1 | 0.6211  | 0.1795  | 0.44574 | Biso | 1 | N  | -0.370333 |  |
| H11 | 1 | 0.6255  | 0.1845  | 0.4202  | Biso | 1 | H  | 0.320591  |  |
| N5  | 1 | 0.64059 | 0.2236  | 0.5075  | Biso | 1 | N  | -0.516802 |  |
| N6  | 1 | 0.6629  | 0.2713  | 0.56602 | Biso | 1 | N  | -0.359173 |  |
| H12 | 1 | 0.6341  | 0.2508  | 0.5751  | Biso | 1 | H  | 0.319496  |  |
| O1  | 1 | 0.52638 | 0.0224  | 0.3658  | Biso | 1 | O  | -0.53778  |  |
| O2  | 1 | 0.5383  | 0.91672 | 0.50575 | Biso | 1 | O  | -0.304652 |  |
| O3  | 1 | 0.46519 | 0.97558 | 0.40521 | Biso | 1 | O  | -0.602438 |  |
| O4  | 1 | 0.4947  | 0.8414  | 0.5882  | Biso | 1 | O  | -0.573317 |  |
| H13 | 1 | 0.4883  | 0.8146  | 0.5722  | Biso | 1 | H  | 0.368724  |  |
| O5  | 1 | 0.49266 | 0.12199 | 0.569   | Biso | 1 | O  | -0.440496 |  |
| O6  | 1 | 0.3918  | 0.93392 | 0.50197 | Biso | 1 | O  | -0.285519 |  |
| O7  | 1 | 0.45387 | 0.03953 | 0.55013 | Biso | 1 | O  | -0.594422 |  |
| O8  | 1 | 0.96894 | 0.35395 | 0.33573 | Biso | 1 | O  | -0.590408 |  |
| O9  | 1 | 0.95904 | 0.38938 | 0.39758 | Biso | 1 | O  | -0.589887 |  |
| O10 | 1 | 0.85295 | 0.41121 | 0.64639 | Biso | 1 | O  | -0.527616 |  |
| O11 | 1 | 0.85262 | 0.39018 | 0.58153 | Biso | 1 | O  | -0.602538 |  |
| O12 | 1 | 0.737   | 0.2086  | 0.31607 | Biso | 1 | O  | -0.355935 |  |
| O13 | 1 | 0.8082  | 0.239   | 0.28002 | Biso | 1 | O  | -0.307107 |  |
| O14 | 1 | 0.5875  | 0.3614  | 0.69406 | Biso | 1 | O  | -0.339713 |  |
| O15 | 1 | 0.6619  | 0.4141  | 0.7178  | Biso | 1 | O  | -0.186142 |  |
| Zn2 | 1 | 0.57639 | 0.959   | 0.10736 | Biso | 1 | Zn | 0.926395  |  |
| Na3 | 1 | 0.53084 | 0.06637 | 0.05716 | Biso | 1 | Na | 0.845235  |  |
| Na4 | 1 | 0.53961 | 0.10882 | 0.9572  | Biso | 1 | Na | 0.841621  |  |
| C28 | 1 | 0.1936  | 0.7307  | 0.84576 | Biso | 1 | C  | 0.012245  |  |
| C29 | 1 | 0.226   | 0.728   | 0.88337 | Biso | 1 | C  | -0.211305 |  |
| H14 | 1 | 0.2613  | 0.7476  | 0.8866  | Biso | 1 | H  | 0.13877   |  |
| C30 | 1 | 0.2017  | 0.6945  | 0.91451 | Biso | 1 | C  | 0.276226  |  |
| C31 | 1 | 0.1485  | 0.6662  | 0.90965 | Biso | 1 | C  | -0.211915 |  |
| H15 | 1 | 0.1333  | 0.6438  | 0.9307  | Biso | 1 | H  | 0.122251  |  |
| C32 | 1 | 0.1173  | 0.6709  | 0.8734  | Biso | 1 | C  | 0.018766  |  |
| C33 | 1 | 0.1411  | 0.7013  | 0.84205 | Biso | 1 | C  | -0.123085 |  |
| H16 | 1 | 0.1214  | 0.7022  | 0.8175  | Biso | 1 | H  | 0.140998  |  |
| C34 | 1 | 0.48907 | 0.91145 | 0.00124 | Biso | 1 | C  | 0.014575  |  |
| C35 | 1 | 0.4471  | 0.8691  | 0.99456 | Biso | 1 | C  | -0.208628 |  |
| H17 | 1 | 0.4359  | 0.8442  | 0.0154  | Biso | 1 | H  | 0.132827  |  |

|     |   |         |         |         |         |      |   |           |           |
|-----|---|---------|---------|---------|---------|------|---|-----------|-----------|
| C36 | 1 | 0.4218  | 0.8636  | 0.9572  | Biso    | 1    | C | 0.26799   |           |
| C37 | 1 | 0.4391  | 0.9035  | 0.92599 | Biso    | 1    | C | -0.189813 |           |
| H18 | 1 | 0.4211  | 0.9016  | 0.9008  | Biso    | 1    | H | 0.147649  |           |
| C38 | 1 | 0.48226 |         | 0.94467 | 0.93282 | Biso | 1 | C         | 0.012559  |
| C39 | 1 | 0.50648 |         | 0.94833 | 0.97017 | Biso | 1 | C         | -0.1277   |
| H19 | 1 | 0.5354  | 0.9761  | 0.975   | Biso    | 1    | H | 0.119965  |           |
| C40 | 1 | 0.49836 |         | 0.98425 | 0.89858 | Biso | 1 | C         | 0.592458  |
| C41 | 1 | 0.51474 |         | 0.9149  | 0.044   | Biso | 1 | C         | 0.584817  |
| C42 | 1 | 0.06008 |         | 0.6381  | 0.86769 | Biso | 1 | C         | 0.6058    |
| C43 | 1 | 0.221   | 0.7635  | 0.81096 | Biso    | 1    | C | 0.555082  |           |
| C44 | 1 | 0.2741  | 0.7189  | 0.96992 | Biso    | 1    | C | 0.537993  |           |
| C45 | 1 | 0.3444  | 0.7867  | 0.96964 | Biso    | 1    | C | 0.55558   |           |
| C46 | 1 | 0.3228  | 0.7387  | 0.02704 | Biso    | 1    | C | 0.555476  |           |
| C47 | 1 | 0.1697  | 0.6095  | 0.11522 | Biso    | 1    | C | 0.604194  |           |
| C48 | 1 | 0.2317  | 0.6346  | 0.11989 | Biso    | 1    | C | 0.016248  |           |
| C49 | 1 | 0.2672  | 0.6175  | 0.15429 | Biso    | 1    | C | -0.123579 |           |
| H20 | 1 | 0.2509  | 0.5947  | 0.1747  | Biso    | 1    | H | 0.140168  |           |
| C50 | 1 | 0.3217  | 0.6339  | 0.1567  | Biso    | 1    | C | -0.00876  |           |
| C51 | 1 | 0.2566  | 0.6685  | 0.09094 | Biso    | 1    | C | -0.213506 |           |
| H21 | 1 | 0.2343  | 0.6772  | 0.0682  | Biso    | 1    | H | 0.124618  |           |
| C52 | 1 | 0.3449  | 0.6682  | 0.1236  | Biso    | 1    | C | -0.20822  |           |
| H22 | 1 | 0.385   | 0.6751  | 0.1233  | Biso    | 1    | H | 0.131447  |           |
| C53 | 1 | 0.3127  | 0.6912  | 0.09284 | Biso    | 1    | C | 0.290126  |           |
| C54 | 1 | 0.3654  | 0.6155  | 0.1884  | Biso    | 1    | C | 0.477684  |           |
| N7  | 1 | 0.2271  | 0.6898  | 0.9532  | Biso    | 1    | N | -0.358211 |           |
| H23 | 1 | 0.2106  | 0.6648  | 0.9689  | Biso    | 1    | H | 0.310161  |           |
| N8  | 1 | 0.282   | 0.7066  | 0.00997 | Biso    | 1    | N | -0.50942  |           |
| N9  | 1 | 0.3016  | 0.7596  | 0.94836 | Biso    | 1    | N | -0.504469 |           |
| N10 | 1 | 0.3789  | 0.8205  | 0.94574 | Biso    | 1    | N | -0.37024  |           |
| H24 | 1 | 0.3745  | 0.8155  | 0.9202  | Biso    | 1    | H | 0.320599  |           |
| N11 | 1 | 0.35941 |         | 0.7764  | 0.0075  | Biso | 1 | N         | -0.52367  |
| N12 | 1 | 0.3371  | 0.7287  | 0.06602 | Biso    | 1    | N | -0.356048 |           |
| H25 | 1 | 0.3659  | 0.7492  | 0.0751  | Biso    | 1    | H | 0.320238  |           |
| O16 | 1 | 0.47362 |         | 0.9776  | 0.8658  | Biso | 1 | O         | -0.539057 |
| O17 | 1 | 0.4617  | 0.08328 |         | 0.00575 | Biso | 1 | O         | -0.302065 |
| O18 | 1 | 0.53481 |         | 0.02442 | 0.90521 | Biso | 1 | O         | -0.604648 |
| O19 | 1 | 0.5053  | 0.1586  | 0.0882  | Biso    | 1    | O | -0.572611 |           |
| H26 | 1 | 0.5117  | 0.1854  | 0.0722  | Biso    | 1    | H | 0.368432  |           |
| O20 | 1 | 0.50734 |         | 0.87801 | 0.069   | Biso | 1 | O         | -0.441575 |
| O21 | 1 | 0.6082  | 0.06608 |         | 0.00197 | Biso | 1 | O         | -0.283837 |
| O22 | 1 | 0.54613 |         | 0.96047 | 0.05013 | Biso | 1 | O         | -0.596988 |
| O23 | 1 | 0.03106 |         | 0.64605 | 0.83573 | Biso | 1 | O         | -0.591556 |
| O24 | 1 | 0.04096 |         | 0.61062 | 0.89758 | Biso | 1 | O         | -0.587786 |
| O25 | 1 | 0.14705 |         | 0.58879 | 0.14639 | Biso | 1 | O         | -0.524516 |
| O26 | 1 | 0.14738 |         | 0.60982 | 0.08153 | Biso | 1 | O         | -0.600134 |
| O27 | 1 | 0.263   | 0.7914  | 0.81607 | Biso    | 1    | O | -0.364663 |           |
| O28 | 1 | 0.1918  | 0.761   | 0.78002 | Biso    | 1    | O | -0.31118  |           |
| O29 | 1 | 0.4125  | 0.6386  | 0.19406 | Biso    | 1    | O | -0.337317 |           |
| O30 | 1 | 0.3381  | 0.5859  | 0.2178  | Biso    | 1    | O | -0.188461 |           |
| Zn3 | 1 | 0.459   | 0.92361 |         | 0.35736 | Biso | 1 | Zn        | 0.929997  |
| Na5 | 1 | 0.56637 |         | 0.96916 | 0.30716 | Biso | 1 | Na        | 0.84374   |
| Na6 | 1 | 0.60882 |         | 0.96039 | 0.2072  | Biso | 1 | Na        | 0.841842  |

|     |   |         |         |         |         |      |   |           |           |
|-----|---|---------|---------|---------|---------|------|---|-----------|-----------|
| C55 | 1 | 0.2307  | 0.3064  | 0.09576 | Biso    | 1    | C | 0.015003  |           |
| C56 | 1 | 0.228   | 0.274   | 0.13337 | Biso    | 1    | C | -0.216153 |           |
| H27 | 1 | 0.2476  | 0.2387  | 0.1366  | Biso    | 1    | H | 0.138616  |           |
| C57 | 1 | 0.1945  | 0.2983  | 0.16451 | Biso    | 1    | C | 0.279045  |           |
| C58 | 1 | 0.1662  | 0.3515  | 0.15965 | Biso    | 1    | C | -0.21398  |           |
| H28 | 1 | 0.1438  | 0.3667  | 0.1807  | Biso    | 1    | H | 0.119184  |           |
| C59 | 1 | 0.1709  | 0.3827  | 0.1234  | Biso    | 1    | C | 0.016325  |           |
| C60 | 1 | 0.2013  | 0.3589  | 0.09205 | Biso    | 1    | C | -0.129017 |           |
| H29 | 1 | 0.2022  | 0.3786  | 0.0675  | Biso    | 1    | H | 0.142082  |           |
| C61 | 1 | 0.41145 |         | 0.01093 | 0.25124 | Biso | 1 | C         | 0.0155    |
| C62 | 1 | 0.3691  | 0.0529  | 0.24456 | Biso    | 1    | C | -0.211722 |           |
| H30 | 1 | 0.3442  | 0.0641  | 0.2654  | Biso    | 1    | H | 0.135017  |           |
| C63 | 1 | 0.3636  | 0.0782  | 0.2072  | Biso    | 1    | C | 0.270638  |           |
| C64 | 1 | 0.4035  | 0.0609  | 0.17599 | Biso    | 1    | C | -0.190307 |           |
| H31 | 1 | 0.4016  | 0.0789  | 0.1508  | Biso    | 1    | H | 0.14902   |           |
| C65 | 1 | 0.44467 |         | 0.01774 | 0.18282 | Biso | 1 | C         | 0.009502  |
| C66 | 1 | 0.44833 |         | 0.99352 | 0.22017 | Biso | 1 | C         | -0.129238 |
| H32 | 1 | 0.4761  | 0.9646  | 0.225   | Biso    | 1    | H | 0.123425  |           |
| C67 | 1 | 0.48425 |         | 0.00164 | 0.14858 | Biso | 1 | C         | 0.588062  |
| C68 | 1 | 0.4149  | 0.98526 |         | 0.294   | Biso | 1 | C         | 0.580322  |
| C69 | 1 | 0.1381  | 0.43992 |         | 0.11769 | Biso | 1 | C         | 0.60485   |
| C70 | 1 | 0.2635  | 0.279   | 0.06096 | Biso    | 1    | C | 0.556493  |           |
| C71 | 1 | 0.2189  | 0.2259  | 0.21992 | Biso    | 1    | C | 0.538673  |           |
| C72 | 1 | 0.2867  | 0.1556  | 0.21964 | Biso    | 1    | C | 0.552494  |           |
| C73 | 1 | 0.2387  | 0.1772  | 0.27704 | Biso    | 1    | C | 0.551253  |           |
| C74 | 1 | 0.1095  | 0.3303  | 0.36522 | Biso    | 1    | C | 0.605957  |           |
| C75 | 1 | 0.1346  | 0.2683  | 0.36989 | Biso    | 1    | C | 0.014931  |           |
| C76 | 1 | 0.1175  | 0.2328  | 0.40429 | Biso    | 1    | C | -0.139275 |           |
| H33 | 1 | 0.0947  | 0.2491  | 0.4247  | Biso    | 1    | H | 0.15462   |           |
| C77 | 1 | 0.1339  | 0.1783  | 0.4067  | Biso    | 1    | C | -0.008978 |           |
| C78 | 1 | 0.1685  | 0.2434  | 0.34094 | Biso    | 1    | C | -0.214829 |           |
| H34 | 1 | 0.1772  | 0.2657  | 0.3182  | Biso    | 1    | H | 0.124706  |           |
| C79 | 1 | 0.1682  | 0.1551  | 0.3736  | Biso    | 1    | C | -0.208304 |           |
| H35 | 1 | 0.1751  | 0.115   | 0.3733  | Biso    | 1    | H | 0.130595  |           |
| C80 | 1 | 0.1912  | 0.1873  | 0.34284 | Biso    | 1    | C | 0.288447  |           |
| C81 | 1 | 0.1155  | 0.1346  | 0.4384  | Biso    | 1    | C | 0.478914  |           |
| N13 | 1 | 0.1898  | 0.2729  | 0.2032  | Biso    | 1    | N | -0.3643   |           |
| H36 | 1 | 0.1648  | 0.2894  | 0.2189  | Biso    | 1    | H | 0.307995  |           |
| N14 | 1 | 0.2066  | 0.218   | 0.25997 | Biso    | 1    | N | -0.50453  |           |
| N15 | 1 | 0.2596  | 0.1984  | 0.19836 | Biso    | 1    | N | -0.504182 |           |
| N16 | 1 | 0.3205  | 0.1211  | 0.19574 | Biso    | 1    | N | -0.371843 |           |
| H37 | 1 | 0.3155  | 0.1255  | 0.1702  | Biso    | 1    | H | 0.321517  |           |
| N17 | 1 | 0.2764  | 0.14059 |         | 0.2575  | Biso | 1 | N         | -0.51563  |
| N18 | 1 | 0.2287  | 0.1629  | 0.31602 | Biso    | 1    | N | -0.358061 |           |
| H38 | 1 | 0.2492  | 0.1341  | 0.3251  | Biso    | 1    | H | 0.318904  |           |
| O31 | 1 | 0.4776  | 0.02638 |         | 0.1158  | Biso | 1 | O         | -0.542686 |
| O32 | 1 | 0.58328 |         | 0.0383  | 0.25575 | Biso | 1 | O         | -0.291373 |
| O33 | 1 | 0.52442 |         | 0.96519 | 0.15521 | Biso | 1 | O         | -0.600261 |
| O34 | 1 | 0.6586  | 0.9947  | 0.3382  | Biso    | 1    | O | -0.580962 |           |
| H39 | 1 | 0.6854  | 0.9883  | 0.3222  | Biso    | 1    | H | 0.369282  |           |
| O35 | 1 | 0.37801 |         | 0.99266 | 0.319   | Biso | 1 | O         | -0.436684 |
| O36 | 1 | 0.56608 |         | 0.8918  | 0.25197 | Biso | 1 | O         | -0.283124 |

|      |   |         |         |         |      |   |    |           |
|------|---|---------|---------|---------|------|---|----|-----------|
| O37  | 1 | 0.46047 | 0.95387 | 0.30013 | Biso | 1 | O  | -0.597792 |
| O38  | 1 | 0.14605 | 0.46894 | 0.08573 | Biso | 1 | O  | -0.585608 |
| O39  | 1 | 0.11062 | 0.45904 | 0.14758 | Biso | 1 | O  | -0.583112 |
| O40  | 1 | 0.08879 | 0.35295 | 0.39639 | Biso | 1 | O  | -0.528455 |
| O41  | 1 | 0.10982 | 0.35262 | 0.33153 | Biso | 1 | O  | -0.599354 |
| O42  | 1 | 0.2914  | 0.237   | 0.06607 | Biso | 1 | O  | -0.365377 |
| O43  | 1 | 0.261   | 0.3082  | 0.03002 | Biso | 1 | O  | -0.312692 |
| O44  | 1 | 0.1386  | 0.0875  | 0.44406 | Biso | 1 | O  | -0.339094 |
| O45  | 1 | 0.0859  | 0.1619  | 0.4678  | Biso | 1 | O  | -0.190184 |
| Zn4  | 1 | 0.541   | 0.07639 | 0.85736 | Biso | 1 | Zn | 0.930079  |
| Na7  | 1 | 0.43363 | 0.03084 | 0.80716 | Biso | 1 | Na | 0.843676  |
| Na8  | 1 | 0.39118 | 0.03961 | 0.7072  | Biso | 1 | Na | 0.841693  |
| C82  | 1 | 0.7693  | 0.6936  | 0.59576 | Biso | 1 | C  | 0.014733  |
| C83  | 1 | 0.772   | 0.726   | 0.63337 | Biso | 1 | C  | -0.212368 |
| H40  | 1 | 0.7524  | 0.7613  | 0.6366  | Biso | 1 | H  | 0.138345  |
| C84  | 1 | 0.8055  | 0.7017  | 0.66451 | Biso | 1 | C  | 0.280198  |
| C85  | 1 | 0.8338  | 0.6485  | 0.65965 | Biso | 1 | C  | -0.215614 |
| H41  | 1 | 0.8562  | 0.6333  | 0.6807  | Biso | 1 | H  | 0.121301  |
| C86  | 1 | 0.8291  | 0.6173  | 0.6234  | Biso | 1 | C  | 0.01723   |
| C87  | 1 | 0.7987  | 0.6411  | 0.59205 | Biso | 1 | C  | -0.131703 |
| H42  | 1 | 0.7978  | 0.6214  | 0.5675  | Biso | 1 | H  | 0.143999  |
| C88  | 1 | 0.58855 | 0.98907 | 0.75124 | Biso | 1 | C  | 0.017766  |
| C89  | 1 | 0.6309  | 0.9471  | 0.74456 | Biso | 1 | C  | -0.212386 |
| H43  | 1 | 0.6558  | 0.9359  | 0.7654  | Biso | 1 | H  | 0.134443  |
| C90  | 1 | 0.6364  | 0.9218  | 0.7072  | Biso | 1 | C  | 0.270546  |
| C91  | 1 | 0.5965  | 0.9391  | 0.67599 | Biso | 1 | C  | -0.191573 |
| H44  | 1 | 0.5984  | 0.9211  | 0.6508  | Biso | 1 | H  | 0.149477  |
| C92  | 1 | 0.55533 | 0.98226 | 0.68282 | Biso | 1 | C  | 0.008989  |
| C93  | 1 | 0.55167 | 0.00648 | 0.72017 | Biso | 1 | C  | -0.131232 |
| H45  | 1 | 0.5239  | 0.0354  | 0.725   | Biso | 1 | H  | 0.123586  |
| C94  | 1 | 0.51575 | 0.99836 | 0.64858 | Biso | 1 | C  | 0.589546  |
| C95  | 1 | 0.5851  | 0.01474 | 0.794   | Biso | 1 | C  | 0.578309  |
| C96  | 1 | 0.8619  | 0.56008 | 0.61769 | Biso | 1 | C  | 0.60631   |
| C97  | 1 | 0.7365  | 0.721   | 0.56096 | Biso | 1 | C  | 0.555746  |
| C98  | 1 | 0.7811  | 0.7741  | 0.71992 | Biso | 1 | C  | 0.538122  |
| C99  | 1 | 0.7133  | 0.8444  | 0.71964 | Biso | 1 | C  | 0.553131  |
| C100 | 1 | 0.7613  | 0.8228  | 0.77704 | Biso | 1 | C  | 0.552665  |
| C101 | 1 | 0.8905  | 0.6697  | 0.86522 | Biso | 1 | C  | 0.605168  |
| C102 | 1 | 0.8654  | 0.7317  | 0.86989 | Biso | 1 | C  | 0.014383  |
| C103 | 1 | 0.8825  | 0.7672  | 0.90429 | Biso | 1 | C  | -0.140648 |
| H46  | 1 | 0.9053  | 0.7509  | 0.9247  | Biso | 1 | H  | 0.154689  |
| C104 | 1 | 0.8661  | 0.8217  | 0.9067  | Biso | 1 | C  | -0.004521 |
| C105 | 1 | 0.8315  | 0.7566  | 0.84094 | Biso | 1 | C  | -0.211348 |
| H47  | 1 | 0.8228  | 0.7343  | 0.8182  | Biso | 1 | H  | 0.123817  |
| C106 | 1 | 0.8318  | 0.8449  | 0.8736  | Biso | 1 | C  | -0.208498 |
| H48  | 1 | 0.8249  | 0.885   | 0.8733  | Biso | 1 | H  | 0.130289  |
| C107 | 1 | 0.8088  | 0.8127  | 0.84284 | Biso | 1 | C  | 0.285828  |
| C108 | 1 | 0.8845  | 0.8654  | 0.9384  | Biso | 1 | C  | 0.478301  |
| N19  | 1 | 0.8102  | 0.7271  | 0.7032  | Biso | 1 | N  | -0.364156 |
| H49  | 1 | 0.8352  | 0.7106  | 0.7189  | Biso | 1 | H  | 0.308061  |
| N20  | 1 | 0.7934  | 0.782   | 0.75997 | Biso | 1 | N  | -0.504814 |
| N21  | 1 | 0.7404  | 0.8016  | 0.69836 | Biso | 1 | N  | -0.504951 |

|      |   |         |         |         |      |   |    |           |  |
|------|---|---------|---------|---------|------|---|----|-----------|--|
| N22  | 1 | 0.6795  | 0.8789  | 0.69574 | Biso | 1 | N  | -0.372429 |  |
| H50  | 1 | 0.6845  | 0.8745  | 0.6702  | Biso | 1 | H  | 0.320805  |  |
| N23  | 1 | 0.7236  | 0.85941 | 0.7575  | Biso | 1 | N  | -0.516903 |  |
| N24  | 1 | 0.7713  | 0.8371  | 0.81602 | Biso | 1 | N  | -0.354852 |  |
| H51  | 1 | 0.7508  | 0.8659  | 0.8251  | Biso | 1 | H  | 0.318312  |  |
| O46  | 1 | 0.5224  | 0.97362 | 0.6158  | Biso | 1 | O  | -0.543425 |  |
| O47  | 1 | 0.41672 | 0.9617  | 0.75575 | Biso | 1 | O  | -0.290193 |  |
| O48  | 1 | 0.47558 | 0.03481 | 0.65521 | Biso | 1 | O  | -0.601792 |  |
| O49  | 1 | 0.3414  | 0.0053  | 0.8382  | Biso | 1 | O  | -0.577611 |  |
| H52  | 1 | 0.3146  | 0.0117  | 0.8222  | Biso | 1 | H  | 0.370447  |  |
| O50  | 1 | 0.62199 | 0.00734 | 0.819   | Biso | 1 | O  | -0.436219 |  |
| O51  | 1 | 0.43392 | 0.1082  | 0.75197 | Biso | 1 | O  | -0.284193 |  |
| O52  | 1 | 0.53953 | 0.04613 | 0.80013 | Biso | 1 | O  | -0.597192 |  |
| O53  | 1 | 0.85395 | 0.53106 | 0.58573 | Biso | 1 | O  | -0.586069 |  |
| O54  | 1 | 0.88938 | 0.54096 | 0.64758 | Biso | 1 | O  | -0.586204 |  |
| O55  | 1 | 0.91121 | 0.64705 | 0.89639 | Biso | 1 | O  | -0.526436 |  |
| O56  | 1 | 0.89018 | 0.64738 | 0.83153 | Biso | 1 | O  | -0.602438 |  |
| O57  | 1 | 0.7086  | 0.763   | 0.56607 | Biso | 1 | O  | -0.364259 |  |
| O58  | 1 | 0.739   | 0.6918  | 0.53002 | Biso | 1 | O  | -0.313129 |  |
| O59  | 1 | 0.8614  | 0.9125  | 0.94406 | Biso | 1 | O  | -0.340774 |  |
| O60  | 1 | 0.9141  | 0.8381  | 0.9678  | Biso | 1 | O  | -0.187611 |  |
| Zn5  | 1 | 0.07639 | 0.541   | 0.14264 | Biso | 1 | Zn | 0.930943  |  |
| Na9  | 1 | 0.03084 | 0.43363 | 0.19284 | Biso | 1 | Na | 0.844224  |  |
| Na10 | 1 | 0.03961 | 0.39118 | 0.2928  | Biso | 1 | Na | 0.840602  |  |
| C109 | 1 | 0.6936  | 0.7693  | 0.40424 | Biso | 1 | C  | 0.014328  |  |
| C110 | 1 | 0.726   | 0.772   | 0.36663 | Biso | 1 | C  | -0.214186 |  |
| H53  | 1 | 0.7613  | 0.7524  | 0.3634  | Biso | 1 | H  | 0.138021  |  |
| C111 | 1 | 0.7017  | 0.8055  | 0.33549 | Biso | 1 | C  | 0.281827  |  |
| C112 | 1 | 0.6485  | 0.8338  | 0.34035 | Biso | 1 | C  | -0.216752 |  |
| H54  | 1 | 0.6333  | 0.8562  | 0.3193  | Biso | 1 | H  | 0.121522  |  |
| C113 | 1 | 0.6173  | 0.8291  | 0.3766  | Biso | 1 | C  | 0.018432  |  |
| C114 | 1 | 0.6411  | 0.7987  | 0.40795 | Biso | 1 | C  | -0.133259 |  |
| H55  | 1 | 0.6214  | 0.7978  | 0.4325  | Biso | 1 | H  | 0.143882  |  |
| C115 | 1 | 0.98907 | 0.58855 | 0.24876 | Biso | 1 | C  | 0.01884   |  |
| C116 | 1 | 0.9471  | 0.6309  | 0.25544 | Biso | 1 | C  | -0.210541 |  |
| H56  | 1 | 0.9359  | 0.6558  | 0.2346  | Biso | 1 | H  | 0.13495   |  |
| C117 | 1 | 0.9218  | 0.6364  | 0.2928  | Biso | 1 | C  | 0.271397  |  |
| C118 | 1 | 0.9391  | 0.5965  | 0.32401 | Biso | 1 | C  | -0.191625 |  |
| H57  | 1 | 0.9211  | 0.5984  | 0.3492  | Biso | 1 | H  | 0.149144  |  |
| C119 | 1 | 0.98226 | 0.55533 | 0.31718 | Biso | 1 | C  | 0.009295  |  |
| C120 | 1 | 0.00648 | 0.55167 | 0.27983 | Biso | 1 | C  | -0.12819  |  |
| H58  | 1 | 0.0354  | 0.5239  | 0.275   | Biso | 1 | H  | 0.123353  |  |
| C121 | 1 | 0.99836 | 0.51575 | 0.35142 | Biso | 1 | C  | 0.589968  |  |
| C122 | 1 | 0.01474 | 0.5851  | 0.206   | Biso | 1 | C  | 0.579813  |  |
| C123 | 1 | 0.56008 | 0.8619  | 0.38231 | Biso | 1 | C  | 0.607356  |  |
| C124 | 1 | 0.721   | 0.7365  | 0.43904 | Biso | 1 | C  | 0.556337  |  |
| C125 | 1 | 0.7741  | 0.7811  | 0.28008 | Biso | 1 | C  | 0.538633  |  |
| C126 | 1 | 0.8444  | 0.7133  | 0.28036 | Biso | 1 | C  | 0.552321  |  |
| C127 | 1 | 0.8228  | 0.7613  | 0.22296 | Biso | 1 | C  | 0.552589  |  |
| C128 | 1 | 0.6697  | 0.8905  | 0.13478 | Biso | 1 | C  | 0.605287  |  |
| C129 | 1 | 0.7317  | 0.8654  | 0.13011 | Biso | 1 | C  | 0.013906  |  |
| C130 | 1 | 0.7672  | 0.8825  | 0.09571 | Biso | 1 | C  | -0.141578 |  |

|      |   |         |         |         |      |   |    |           |  |
|------|---|---------|---------|---------|------|---|----|-----------|--|
| H59  | 1 | 0.7509  | 0.9053  | 0.0753  | Biso | 1 | H  | 0.154644  |  |
| C131 | 1 | 0.8217  | 0.8661  | 0.0933  | Biso | 1 | C  | -0.004512 |  |
| C132 | 1 | 0.7566  | 0.8315  | 0.15906 | Biso | 1 | C  | -0.21098  |  |
| H60  | 1 | 0.7343  | 0.8228  | 0.1818  | Biso | 1 | H  | 0.123646  |  |
| C133 | 1 | 0.8449  | 0.8318  | 0.1264  | Biso | 1 | C  | -0.209214 |  |
| H61  | 1 | 0.885   | 0.8249  | 0.1267  | Biso | 1 | H  | 0.13022   |  |
| C134 | 1 | 0.8127  | 0.8088  | 0.15716 | Biso | 1 | C  | 0.28569   |  |
| C135 | 1 | 0.8654  | 0.8845  | 0.0616  | Biso | 1 | C  | 0.47774   |  |
| N25  | 1 | 0.7271  | 0.8102  | 0.2968  | Biso | 1 | N  | -0.366376 |  |
| H62  | 1 | 0.7106  | 0.8352  | 0.2811  | Biso | 1 | H  | 0.308173  |  |
| N26  | 1 | 0.782   | 0.7934  | 0.24003 | Biso | 1 | N  | -0.504842 |  |
| N27  | 1 | 0.8016  | 0.7404  | 0.30164 | Biso | 1 | N  | -0.50517  |  |
| N28  | 1 | 0.8789  | 0.6795  | 0.30426 | Biso | 1 | N  | -0.36793  |  |
| H63  | 1 | 0.8745  | 0.6845  | 0.3298  | Biso | 1 | H  | 0.320727  |  |
| N29  | 1 | 0.85941 | 0.7236  | 0.2425  | Biso | 1 | N  | -0.515905 |  |
| N30  | 1 | 0.8371  | 0.7713  | 0.18398 | Biso | 1 | N  | -0.355075 |  |
| H64  | 1 | 0.8659  | 0.7508  | 0.1749  | Biso | 1 | H  | 0.318537  |  |
| O61  | 1 | 0.97362 | 0.5224  | 0.3842  | Biso | 1 | O  | -0.546153 |  |
| O62  | 1 | 0.9617  | 0.41672 | 0.24425 | Biso | 1 | O  | -0.285378 |  |
| O63  | 1 | 0.03481 | 0.47558 | 0.34479 | Biso | 1 | O  | -0.602922 |  |
| O64  | 1 | 0.0053  | 0.3414  | 0.1618  | Biso | 1 | O  | -0.582202 |  |
| H65  | 1 | 0.0117  | 0.3146  | 0.1778  | Biso | 1 | H  | 0.369778  |  |
| O65  | 1 | 0.00734 | 0.62199 | 0.181   | Biso | 1 | O  | -0.450605 |  |
| O66  | 1 | 0.1082  | 0.43392 | 0.24803 | Biso | 1 | O  | -0.285686 |  |
| O67  | 1 | 0.04613 | 0.53953 | 0.19987 | Biso | 1 | O  | -0.60417  |  |
| O68  | 1 | 0.53106 | 0.85395 | 0.41427 | Biso | 1 | O  | -0.593313 |  |
| O69  | 1 | 0.54096 | 0.88938 | 0.35242 | Biso | 1 | O  | -0.590439 |  |
| O70  | 1 | 0.64705 | 0.91121 | 0.10361 | Biso | 1 | O  | -0.526014 |  |
| O71  | 1 | 0.64738 | 0.89018 | 0.16847 | Biso | 1 | O  | -0.606812 |  |
| O72  | 1 | 0.763   | 0.7086  | 0.43393 | Biso | 1 | O  | -0.363166 |  |
| O73  | 1 | 0.6918  | 0.739   | 0.46998 | Biso | 1 | O  | -0.312546 |  |
| O74  | 1 | 0.9125  | 0.8614  | 0.05594 | Biso | 1 | O  | -0.339658 |  |
| O75  | 1 | 0.8381  | 0.9141  | 0.0322  | Biso | 1 | O  | -0.185837 |  |
| Zn6  | 1 | 0.92361 | 0.459   | 0.64264 | Biso | 1 | Zn | 0.930204  |  |
| Na11 | 1 | 0.96916 | 0.56637 | 0.69284 | Biso | 1 | Na | 0.84401   |  |
| Na12 | 1 | 0.96039 | 0.60882 | 0.7928  | Biso | 1 | Na | 0.841204  |  |
| C136 | 1 | 0.3064  | 0.2307  | 0.90424 | Biso | 1 | C  | 0.014991  |  |
| C137 | 1 | 0.274   | 0.228   | 0.86663 | Biso | 1 | C  | -0.215865 |  |
| H66  | 1 | 0.2387  | 0.2476  | 0.8634  | Biso | 1 | H  | 0.13869   |  |
| C138 | 1 | 0.2983  | 0.1945  | 0.83549 | Biso | 1 | C  | 0.278694  |  |
| C139 | 1 | 0.3515  | 0.1662  | 0.84035 | Biso | 1 | C  | -0.215402 |  |
| H67  | 1 | 0.3667  | 0.1438  | 0.8193  | Biso | 1 | H  | 0.121007  |  |
| C140 | 1 | 0.3827  | 0.1709  | 0.8766  | Biso | 1 | C  | 0.017387  |  |
| C141 | 1 | 0.3589  | 0.2013  | 0.90795 | Biso | 1 | C  | -0.129358 |  |
| H68  | 1 | 0.3786  | 0.2022  | 0.9325  | Biso | 1 | H  | 0.14155   |  |
| C142 | 1 | 0.01093 | 0.41145 | 0.74876 | Biso | 1 | C  | 0.016332  |  |
| C143 | 1 | 0.0529  | 0.3691  | 0.75544 | Biso | 1 | C  | -0.21209  |  |
| H69  | 1 | 0.0641  | 0.3442  | 0.7346  | Biso | 1 | H  | 0.134983  |  |
| C144 | 1 | 0.0782  | 0.3636  | 0.7928  | Biso | 1 | C  | 0.270301  |  |
| C145 | 1 | 0.0609  | 0.4035  | 0.82401 | Biso | 1 | C  | -0.18773  |  |
| H70  | 1 | 0.0789  | 0.4016  | 0.8492  | Biso | 1 | H  | 0.149574  |  |
| C146 | 1 | 0.01774 | 0.44467 | 0.81718 | Biso | 1 | C  | 0.009556  |  |

|      |   |         |         |         |      |   |    |           |
|------|---|---------|---------|---------|------|---|----|-----------|
| C147 | 1 | 0.99352 | 0.44833 | 0.77983 | Biso | 1 | C  | -0.12819  |
| H71  | 1 | 0.9646  | 0.4761  | 0.775   | Biso | 1 | H  | 0.123645  |
| C148 | 1 | 0.00164 | 0.48425 | 0.85142 | Biso | 1 | C  | 0.587313  |
| C149 | 1 | 0.98526 | 0.4149  | 0.706   | Biso | 1 | C  | 0.579932  |
| C150 | 1 | 0.43992 | 0.1381  | 0.88231 | Biso | 1 | C  | 0.606155  |
| C151 | 1 | 0.279   | 0.2635  | 0.93904 | Biso | 1 | C  | 0.556188  |
| C152 | 1 | 0.2259  | 0.2189  | 0.78008 | Biso | 1 | C  | 0.540691  |
| C153 | 1 | 0.1556  | 0.2867  | 0.78036 | Biso | 1 | C  | 0.552783  |
| C154 | 1 | 0.1772  | 0.2387  | 0.72296 | Biso | 1 | C  | 0.553631  |
| C155 | 1 | 0.3303  | 0.1095  | 0.63478 | Biso | 1 | C  | 0.605713  |
| C156 | 1 | 0.2683  | 0.1346  | 0.63011 | Biso | 1 | C  | 0.014732  |
| C157 | 1 | 0.2328  | 0.1175  | 0.59571 | Biso | 1 | C  | -0.136217 |
| H72  | 1 | 0.2491  | 0.0947  | 0.5753  | Biso | 1 | H  | 0.154813  |
| C158 | 1 | 0.1783  | 0.1339  | 0.5933  | Biso | 1 | C  | -0.009351 |
| C159 | 1 | 0.2434  | 0.1685  | 0.65906 | Biso | 1 | C  | -0.213748 |
| H73  | 1 | 0.2657  | 0.1772  | 0.6818  | Biso | 1 | H  | 0.125364  |
| C160 | 1 | 0.1551  | 0.1682  | 0.6264  | Biso | 1 | C  | -0.206382 |
| H74  | 1 | 0.115   | 0.1751  | 0.6267  | Biso | 1 | H  | 0.130845  |
| C161 | 1 | 0.1873  | 0.1912  | 0.65716 | Biso | 1 | C  | 0.290703  |
| C162 | 1 | 0.1346  | 0.1155  | 0.5616  | Biso | 1 | C  | 0.477944  |
| N31  | 1 | 0.2729  | 0.1898  | 0.7968  | Biso | 1 | N  | -0.36456  |
| H75  | 1 | 0.2894  | 0.1648  | 0.7811  | Biso | 1 | H  | 0.307943  |
| N32  | 1 | 0.218   | 0.2066  | 0.74003 | Biso | 1 | N  | -0.515453 |
| N33  | 1 | 0.1984  | 0.2596  | 0.80164 | Biso | 1 | N  | -0.507176 |
| N34  | 1 | 0.1211  | 0.3205  | 0.80426 | Biso | 1 | N  | -0.369464 |
| H76  | 1 | 0.1255  | 0.3155  | 0.8298  | Biso | 1 | H  | 0.321868  |
| N35  | 1 | 0.14059 | 0.2764  | 0.7425  | Biso | 1 | N  | -0.512066 |
| N36  | 1 | 0.1629  | 0.2287  | 0.68398 | Biso | 1 | N  | -0.356224 |
| H77  | 1 | 0.1341  | 0.2492  | 0.6749  | Biso | 1 | H  | 0.318821  |
| O76  | 1 | 0.02638 | 0.4776  | 0.8842  | Biso | 1 | O  | -0.536497 |
| O77  | 1 | 0.0383  | 0.58328 | 0.74425 | Biso | 1 | O  | -0.290492 |
| O78  | 1 | 0.96519 | 0.52442 | 0.84479 | Biso | 1 | O  | -0.599905 |
| O79  | 1 | 0.9947  | 0.6586  | 0.6618  | Biso | 1 | O  | -0.578825 |
| H78  | 1 | 0.9883  | 0.6854  | 0.6778  | Biso | 1 | H  | 0.369123  |
| O80  | 1 | 0.99266 | 0.37801 | 0.681   | Biso | 1 | O  | -0.435283 |
| O81  | 1 | 0.8918  | 0.56608 | 0.74803 | Biso | 1 | O  | -0.285249 |
| O82  | 1 | 0.95387 | 0.46047 | 0.69987 | Biso | 1 | O  | -0.597705 |
| O83  | 1 | 0.46894 | 0.14605 | 0.91427 | Biso | 1 | O  | -0.594348 |
| O84  | 1 | 0.45904 | 0.11062 | 0.85242 | Biso | 1 | O  | -0.588899 |
| O85  | 1 | 0.35295 | 0.08879 | 0.60361 | Biso | 1 | O  | -0.526375 |
| O86  | 1 | 0.35262 | 0.10982 | 0.66847 | Biso | 1 | O  | -0.603243 |
| O87  | 1 | 0.237   | 0.2914  | 0.93393 | Biso | 1 | O  | -0.361996 |
| O88  | 1 | 0.3082  | 0.261   | 0.96998 | Biso | 1 | O  | -0.313148 |
| O89  | 1 | 0.0875  | 0.1386  | 0.55594 | Biso | 1 | O  | -0.336822 |
| O90  | 1 | 0.1619  | 0.0859  | 0.5322  | Biso | 1 | O  | -0.188242 |
| Zn7  | 1 | 0.041   | 0.42361 | 0.39264 | Biso | 1 | Zn | 0.926471  |
| Na13 | 1 | 0.93363 | 0.46916 | 0.44284 | Biso | 1 | Na | 0.845753  |
| Na14 | 1 | 0.89118 | 0.46039 | 0.5428  | Biso | 1 | Na | 0.842127  |
| C163 | 1 | 0.2693  | 0.8064  | 0.65424 | Biso | 1 | C  | 0.014767  |
| C164 | 1 | 0.272   | 0.774   | 0.61663 | Biso | 1 | C  | -0.212085 |
| H79  | 1 | 0.2524  | 0.7387  | 0.6134  | Biso | 1 | H  | 0.1384    |
| C165 | 1 | 0.3055  | 0.7983  | 0.58549 | Biso | 1 | C  | 0.278618  |

|      |   |         |         |         |         |      |   |           |           |
|------|---|---------|---------|---------|---------|------|---|-----------|-----------|
| C166 | 1 | 0.3338  | 0.8515  | 0.59035 | Biso    | 1    | C | -0.214608 |           |
| H80  | 1 | 0.3562  | 0.8667  | 0.5693  | Biso    | 1    | H | 0.121232  |           |
| C167 | 1 | 0.3291  | 0.8827  | 0.6266  | Biso    | 1    | C | 0.016923  |           |
| C168 | 1 | 0.2987  | 0.8589  | 0.65795 | Biso    | 1    | C | -0.131494 |           |
| H81  | 1 | 0.2978  | 0.8786  | 0.6825  | Biso    | 1    | H | 0.143035  |           |
| C169 | 1 | 0.08855 |         | 0.51093 | 0.49876 | Biso | 1 | C         | 0.017112  |
| C170 | 1 | 0.1309  | 0.5529  | 0.50544 | Biso    | 1    | C | -0.211118 |           |
| H82  | 1 | 0.1558  | 0.5641  | 0.4846  | Biso    | 1    | H | 0.133022  |           |
| C171 | 1 | 0.1364  | 0.5782  | 0.5428  | Biso    | 1    | C | 0.267663  |           |
| C172 | 1 | 0.0965  | 0.5609  | 0.57401 | Biso    | 1    | C | -0.188499 |           |
| H83  | 1 | 0.0984  | 0.5789  | 0.5992  | Biso    | 1    | H | 0.147028  |           |
| C173 | 1 | 0.05533 |         | 0.51774 | 0.56718 | Biso | 1 | C         | 0.011975  |
| C174 | 1 | 0.05167 |         | 0.49352 | 0.52983 | Biso | 1 | C         | -0.12765  |
| H84  | 1 | 0.0239  | 0.4646  | 0.525   | Biso    | 1    | H | 0.119016  |           |
| C175 | 1 | 0.01575 |         | 0.50164 | 0.60142 | Biso | 1 | C         | 0.590532  |
| C176 | 1 | 0.0851  | 0.48526 |         | 0.456   | Biso | 1 | C         | 0.58117   |
| C177 | 1 | 0.3619  | 0.93992 |         | 0.63231 | Biso | 1 | C         | 0.60636   |
| C178 | 1 | 0.2365  | 0.779   | 0.68904 | Biso    | 1    | C | 0.554175  |           |
| C179 | 1 | 0.2811  | 0.7259  | 0.53008 | Biso    | 1    | C | 0.539316  |           |
| C180 | 1 | 0.2133  | 0.6556  | 0.53036 | Biso    | 1    | C | 0.553643  |           |
| C181 | 1 | 0.2613  | 0.6772  | 0.47296 | Biso    | 1    | C | 0.554593  |           |
| C182 | 1 | 0.3905  | 0.8303  | 0.38478 | Biso    | 1    | C | 0.604877  |           |
| C183 | 1 | 0.3654  | 0.7683  | 0.38011 | Biso    | 1    | C | 0.014908  |           |
| C184 | 1 | 0.3825  | 0.7328  | 0.34571 | Biso    | 1    | C | -0.137416 |           |
| H85  | 1 | 0.4053  | 0.7491  | 0.3253  | Biso    | 1    | H | 0.154793  |           |
| C185 | 1 | 0.3661  | 0.6783  | 0.3433  | Biso    | 1    | C | -0.010605 |           |
| C186 | 1 | 0.3315  | 0.7434  | 0.40906 | Biso    | 1    | C | -0.221052 |           |
| H86  | 1 | 0.3228  | 0.7657  | 0.4318  | Biso    | 1    | H | 0.133648  |           |
| C187 | 1 | 0.3318  | 0.6551  | 0.3764  | Biso    | 1    | C | -0.207092 |           |
| H87  | 1 | 0.3249  | 0.615   | 0.3767  | Biso    | 1    | H | 0.131011  |           |
| C188 | 1 | 0.3088  | 0.6873  | 0.40716 | Biso    | 1    | C | 0.288232  |           |
| C189 | 1 | 0.3845  | 0.6346  | 0.3116  | Biso    | 1    | C | 0.477828  |           |
| N37  | 1 | 0.3102  | 0.7729  | 0.5468  | Biso    | 1    | N | -0.368644 |           |
| H88  | 1 | 0.3352  | 0.7894  | 0.5311  | Biso    | 1    | H | 0.310313  |           |
| N38  | 1 | 0.2934  | 0.718   | 0.49003 | Biso    | 1    | N | -0.505983 |           |
| N39  | 1 | 0.2404  | 0.6984  | 0.55164 | Biso    | 1    | N | -0.504251 |           |
| N40  | 1 | 0.1795  | 0.6211  | 0.55426 | Biso    | 1    | N | -0.371796 |           |
| H89  | 1 | 0.1845  | 0.6255  | 0.5798  | Biso    | 1    | H | 0.320244  |           |
| N41  | 1 | 0.2236  | 0.64059 |         | 0.4925  | Biso | 1 | N         | -0.516933 |
| N42  | 1 | 0.2713  | 0.6629  | 0.43398 | Biso    | 1    | N | -0.35727  |           |
| H90  | 1 | 0.2508  | 0.6341  | 0.4249  | Biso    | 1    | H | 0.319821  |           |
| O91  | 1 | 0.0224  | 0.52638 |         | 0.6342  | Biso | 1 | O         | -0.542176 |
| O92  | 1 | 0.91672 |         | 0.5383  | 0.49425 | Biso | 1 | O         | -0.302407 |
| O93  | 1 | 0.97558 |         | 0.46519 | 0.59479 | Biso | 1 | O         | -0.603784 |
| O94  | 1 | 0.8414  | 0.4947  | 0.4118  | Biso    | 1    | O | -0.572738 |           |
| H91  | 1 | 0.8146  | 0.4883  | 0.4278  | Biso    | 1    | H | 0.368295  |           |
| O95  | 1 | 0.12199 |         | 0.49266 | 0.431   | Biso | 1 | O         | -0.438965 |
| O96  | 1 | 0.93392 |         | 0.3918  | 0.49803 | Biso | 1 | O         | -0.281864 |
| O97  | 1 | 0.03953 |         | 0.45387 | 0.44987 | Biso | 1 | O         | -0.593567 |
| O98  | 1 | 0.35395 |         | 0.96894 | 0.66427 | Biso | 1 | O         | -0.583644 |
| O99  | 1 | 0.38938 |         | 0.95904 | 0.60242 | Biso | 1 | O         | -0.584955 |
| O100 | 1 | 0.41121 |         | 0.85295 | 0.35361 | Biso | 1 | O         | -0.525634 |

|      |   |         |         |         |      |   |    |           |
|------|---|---------|---------|---------|------|---|----|-----------|
| O101 | 1 | 0.39018 | 0.85262 | 0.41847 | Biso | 1 | O  | -0.59748  |
| O102 | 1 | 0.2086  | 0.737   | 0.68393 | Biso | 1 | O  | -0.363026 |
| O103 | 1 | 0.239   | 0.8082  | 0.71998 | Biso | 1 | O  | -0.312084 |
| O104 | 1 | 0.3614  | 0.5875  | 0.30594 | Biso | 1 | O  | -0.336465 |
| O105 | 1 | 0.4141  | 0.6619  | 0.2822  | Biso | 1 | O  | -0.188183 |
| Zn8  | 1 | 0.959   | 0.57639 | 0.89264 | Biso | 1 | Zn | 0.926199  |
| Na15 | 1 | 0.06637 | 0.53084 | 0.94284 | Biso | 1 | Na | 0.847015  |
| Na16 | 1 | 0.10882 | 0.53961 | 0.0428  | Biso | 1 | Na | 0.842669  |
| C190 | 1 | 0.7307  | 0.1936  | 0.15424 | Biso | 1 | C  | 0.010483  |
| C191 | 1 | 0.728   | 0.226   | 0.11663 | Biso | 1 | C  | -0.211896 |
| H92  | 1 | 0.7476  | 0.2613  | 0.1134  | Biso | 1 | H  | 0.138708  |
| C192 | 1 | 0.6945  | 0.2017  | 0.08549 | Biso | 1 | C  | 0.276972  |
| C193 | 1 | 0.6662  | 0.1485  | 0.09035 | Biso | 1 | C  | -0.213998 |
| H93  | 1 | 0.6438  | 0.1333  | 0.0693  | Biso | 1 | H  | 0.121344  |
| C194 | 1 | 0.6709  | 0.1173  | 0.1266  | Biso | 1 | C  | 0.016791  |
| C195 | 1 | 0.7013  | 0.1411  | 0.15795 | Biso | 1 | C  | -0.125194 |
| H94  | 1 | 0.7022  | 0.1214  | 0.1825  | Biso | 1 | H  | 0.140546  |
| C196 | 1 | 0.91145 | 0.48907 | 0.99876 | Biso | 1 | C  | 0.015501  |
| C197 | 1 | 0.8691  | 0.4471  | 0.00544 | Biso | 1 | C  | -0.210309 |
| H95  | 1 | 0.8442  | 0.4359  | 0.9846  | Biso | 1 | H  | 0.132999  |
| C198 | 1 | 0.8636  | 0.4218  | 0.0428  | Biso | 1 | C  | 0.267972  |
| C199 | 1 | 0.9035  | 0.4391  | 0.07401 | Biso | 1 | C  | -0.187815 |
| H96  | 1 | 0.9016  | 0.4211  | 0.0992  | Biso | 1 | H  | 0.147531  |
| C200 | 1 | 0.94467 | 0.48226 | 0.06718 | Biso | 1 | C  | 0.012431  |
| C201 | 1 | 0.94833 | 0.50648 | 0.02983 | Biso | 1 | C  | -0.126299 |
| H97  | 1 | 0.9761  | 0.5354  | 0.025   | Biso | 1 | H  | 0.119852  |
| C202 | 1 | 0.98425 | 0.49836 | 0.10142 | Biso | 1 | C  | 0.592519  |
| C203 | 1 | 0.9149  | 0.51474 | 0.956   | Biso | 1 | C  | 0.584005  |
| C204 | 1 | 0.6381  | 0.06008 | 0.13231 | Biso | 1 | C  | 0.604167  |
| C205 | 1 | 0.7635  | 0.221   | 0.18904 | Biso | 1 | C  | 0.553517  |
| C206 | 1 | 0.7189  | 0.2741  | 0.03008 | Biso | 1 | C  | 0.537765  |
| C207 | 1 | 0.7867  | 0.3444  | 0.03036 | Biso | 1 | C  | 0.555279  |
| C208 | 1 | 0.7387  | 0.3228  | 0.97296 | Biso | 1 | C  | 0.554761  |
| C209 | 1 | 0.6095  | 0.1697  | 0.88478 | Biso | 1 | C  | 0.604718  |
| C210 | 1 | 0.6346  | 0.2317  | 0.88011 | Biso | 1 | C  | 0.015323  |
| C211 | 1 | 0.6175  | 0.2672  | 0.84571 | Biso | 1 | C  | -0.126725 |
| H98  | 1 | 0.5947  | 0.2509  | 0.8253  | Biso | 1 | H  | 0.140254  |
| C212 | 1 | 0.6339  | 0.3217  | 0.8433  | Biso | 1 | C  | -0.005548 |
| C213 | 1 | 0.6685  | 0.2566  | 0.90906 | Biso | 1 | C  | -0.213602 |
| H99  | 1 | 0.6772  | 0.2343  | 0.9318  | Biso | 1 | H  | 0.124188  |
| C214 | 1 | 0.6682  | 0.3449  | 0.8764  | Biso | 1 | C  | -0.211429 |
| H100 | 1 | 0.6751  | 0.385   | 0.8767  | Biso | 1 | H  | 0.131548  |
| C215 | 1 | 0.6912  | 0.3127  | 0.90716 | Biso | 1 | C  | 0.289175  |
| C216 | 1 | 0.6155  | 0.3654  | 0.8116  | Biso | 1 | C  | 0.478968  |
| N43  | 1 | 0.6898  | 0.2271  | 0.0468  | Biso | 1 | N  | -0.362598 |
| H101 | 1 | 0.6648  | 0.2106  | 0.0311  | Biso | 1 | H  | 0.309663  |
| N44  | 1 | 0.7066  | 0.282   | 0.99003 | Biso | 1 | N  | -0.503522 |
| N45  | 1 | 0.7596  | 0.3016  | 0.05164 | Biso | 1 | N  | -0.507664 |
| N46  | 1 | 0.8205  | 0.3789  | 0.05426 | Biso | 1 | N  | -0.371324 |
| H102 | 1 | 0.8155  | 0.3745  | 0.0798  | Biso | 1 | H  | 0.320278  |
| N47  | 1 | 0.7764  | 0.35941 | 0.9925  | Biso | 1 | N  | -0.518794 |
| N48  | 1 | 0.7287  | 0.3371  | 0.93398 | Biso | 1 | N  | -0.360719 |

|      |   |         |         |         |      |   |   |           |
|------|---|---------|---------|---------|------|---|---|-----------|
| H103 | 1 | 0.7492  | 0.3659  | 0.9249  | Biso | 1 | H | 0.32038   |
| O106 | 1 | 0.9776  | 0.47362 | 0.1342  | Biso | 1 | O | -0.539725 |
| O107 | 1 | 0.08328 | 0.4617  | 0.99425 | Biso | 1 | O | -0.319436 |
| O108 | 1 | 0.02442 | 0.53481 | 0.09479 | Biso | 1 | O | -0.603887 |
| O109 | 1 | 0.1586  | 0.5053  | 0.9118  | Biso | 1 | O | -0.596151 |
| H104 | 1 | 0.1854  | 0.5117  | 0.9278  | Biso | 1 | H | 0.36737   |
| O110 | 1 | 0.87801 | 0.50734 | 0.931   | Biso | 1 | O | -0.438803 |
| O111 | 1 | 0.06608 | 0.6082  | 0.99803 | Biso | 1 | O | -0.277004 |
| O112 | 1 | 0.96047 | 0.54613 | 0.94987 | Biso | 1 | O | -0.594525 |
| O113 | 1 | 0.64605 | 0.03106 | 0.16427 | Biso | 1 | O | -0.583447 |
| O114 | 1 | 0.61062 | 0.04096 | 0.10242 | Biso | 1 | O | -0.585035 |
| O115 | 1 | 0.58879 | 0.14705 | 0.85361 | Biso | 1 | O | -0.525854 |
| O116 | 1 | 0.60982 | 0.14738 | 0.91847 | Biso | 1 | O | -0.598464 |
| O117 | 1 | 0.7914  | 0.263   | 0.18393 | Biso | 1 | O | -0.359193 |
| O118 | 1 | 0.761   | 0.1918  | 0.21998 | Biso | 1 | O | -0.309034 |
| O119 | 1 | 0.6386  | 0.4125  | 0.80594 | Biso | 1 | O | -0.340683 |
| O120 | 1 | 0.5859  | 0.3381  | 0.7822  | Biso | 1 | O | -0.185695 |

data\_AGOF EJ\_clean

\_cell\_length\_a 19.4251  
\_cell\_length\_b 36.589  
\_cell\_length\_c 37.762  
\_cell\_angle\_alpha 90  
\_cell\_angle\_beta 114.202  
\_cell\_angle\_gamma 90

\_symmetry\_space\_group\_name\_H-M "P 1"  
\_symmetry\_int\_tables\_number 1

loop\_

\_symmetry\_equiv\_pos\_as\_xyz  
'x, y, z'

loop\_

\_atom\_site\_label  
\_atom\_site\_occupancy  
\_atom\_site\_fract\_x  
\_atom\_site\_fract\_y  
\_atom\_site\_fract\_z  
\_atom\_site\_thermal\_displace\_type  
\_atom\_site\_B\_iso\_or\_equiv  
\_atom\_site\_type\_symbol  
\_atom\_site\_charge

|     |   |         |         |         |      |   |    |           |
|-----|---|---------|---------|---------|------|---|----|-----------|
| Cu1 | 1 | 0.09641 | 0.18928 | 0.24703 | Biso | 1 | Cu | 0.712361  |
| C1  | 1 | 0.67548 | 0.98846 | 0.30985 | Biso | 1 | C  | -0.054347 |
| H1  | 1 | 0.7157  | 0.9707  | 0.3242  | Biso | 1 | H  | 0.121944  |
| H2  | 1 | 0.6476  | 0.9941  | 0.326   | Biso | 1 | H  | 0.108619  |
| C2  | 1 | 0.67134 | 0.3559  | 0.3309  | Biso | 1 | C  | -0.052015 |
| H3  | 1 | 0.6924  | 0.3436  | 0.3565  | Biso | 1 | H  | 0.130442  |
| H4  | 1 | 0.6701  | 0.3825  | 0.3355  | Biso | 1 | H  | 0.115315  |
| C3  | 1 | 0.4879  | 0.43387 | 0.17947 | Biso | 1 | C  | -0.05769  |
| H5  | 1 | 0.4498  | 0.4476  | 0.1577  | Biso | 1 | H  | 0.115293  |
| H6  | 1 | 0.4649  | 0.4269  | 0.1975  | Biso | 1 | H  | 0.104754  |
| C4  | 1 | 0.39284 | 0.41904 | 0.71849 | Biso | 1 | C  | -0.059237 |
| H7  | 1 | 0.3831  | 0.4453  | 0.7209  | Biso | 1 | H  | 0.104729  |
| H8  | 1 | 0.3435  | 0.4067  | 0.7052  | Biso | 1 | H  | 0.126926  |
| Cu2 | 1 | 0.16201 | 0.18876 | 0.32339 | Biso | 1 | Cu | 0.734216  |
| Cu3 | 1 | 0.40693 | 0.20514 | 0.94716 | Biso | 1 | Cu | 0.737459  |
| Cu4 | 1 | 0.55494 | 0.2009  | 0.97309 | Biso | 1 | Cu | 0.702809  |
| Cu5 | 1 | 0.54789 | 0.45667 | 0.76222 | Biso | 1 | Cu | 0.222332  |
| Cu6 | 1 | 0.60501 | 0.39218 | 0.24922 | Biso | 1 | Cu | 0.213004  |
| N1  | 1 | 0.62448 | 0.97255 | 0.27348 | Biso | 1 | N  | 0.070785  |
| N2  | 1 | 0.71992 | 0.34895 | 0.31097 | Biso | 1 | N  | 0.088308  |
| N3  | 1 | 0.55249 | 0.4568  | 0.19941 | Biso | 1 | N  | 0.095674  |
| N4  | 1 | 0.43649 | 0.41518 | 0.69499 | Biso | 1 | N  | 0.077867  |
| N5  | 1 | 0.55492 | 0.98856 | 0.25407 | Biso | 1 | N  | -0.291973 |
| N6  | 1 | 0.71141 | 0.37026 | 0.27979 | Biso | 1 | N  | -0.278931 |
| N7  | 1 | 0.60507 | 0.44531 | 0.23428 | Biso | 1 | N  | -0.266063 |
| N8  | 1 | 0.50256 | 0.43409 | 0.70614 | Biso | 1 | N  | -0.266286 |

|     |   |         |         |         |      |   |   |           |
|-----|---|---------|---------|---------|------|---|---|-----------|
| C5  | 1 | 0.52233 | 0.97049 | 0.22025 | Biso | 1 | C | 0.241723  |
| C6  | 1 | 0.76589 | 0.35971 | 0.26914 | Biso | 1 | C | 0.228756  |
| C7  | 1 | 0.65978 | 0.47052 | 0.24542 | Biso | 1 | C | 0.229535  |
| C8  | 1 | 0.5248  | 0.4286  | 0.67735 | Biso | 1 | C | 0.229261  |
| C9  | 1 | 0.5731  | 0.9435  | 0.21741 | Biso | 1 | C | -0.177344 |
| C10 | 1 | 0.81045 | 0.33187 | 0.29355 | Biso | 1 | C | -0.181892 |
| C11 | 1 | 0.64122 | 0.49848 | 0.21701 | Biso | 1 | C | -0.194722 |
| C12 | 1 | 0.4731  | 0.40692 | 0.648   | Biso | 1 | C | -0.1879   |
| C13 | 1 | 0.63699 | 0.94562 | 0.25216 | Biso | 1 | C | 0.152307  |
| C14 | 1 | 0.77864 | 0.32532 | 0.32007 | Biso | 1 | C | 0.154468  |
| C15 | 1 | 0.57171 | 0.48877 | 0.18807 | Biso | 1 | C | 0.156814  |
| C16 | 1 | 0.4162  | 0.39865 | 0.65998 | Biso | 1 | C | 0.166771  |
| C17 | 1 | 0.44489 | 0.98003 | 0.19222 | Biso | 1 | C | -0.522176 |
| H9  | 1 | 0.4098  | 0.9607  | 0.1921  | Biso | 1 | H | 0.162001  |
| H10 | 1 | 0.444   | 0.9825  | 0.1662  | Biso | 1 | H | 0.183308  |
| H11 | 1 | 0.4297  | 0.0032  | 0.1999  | Biso | 1 | H | 0.158954  |
| C18 | 1 | 0.7745  | 0.37881 | 0.23553 | Biso | 1 | C | -0.520535 |
| H12 | 1 | 0.7545  | 0.3631  | 0.2125  | Biso | 1 | H | 0.168043  |
| H13 | 1 | 0.8281  | 0.3837  | 0.2424  | Biso | 1 | H | 0.178521  |
| H14 | 1 | 0.7466  | 0.4019  | 0.23    | Biso | 1 | H | 0.172416  |
| C19 | 1 | 0.72755 | 0.46606 | 0.28259 | Biso | 1 | C | -0.520561 |
| H15 | 1 | 0.7239  | 0.4826  | 0.3022  | Biso | 1 | H | 0.167458  |
| H16 | 1 | 0.773   | 0.4719  | 0.2785  | Biso | 1 | H | 0.181717  |
| H17 | 1 | 0.7304  | 0.4408  | 0.2916  | Biso | 1 | H | 0.161646  |
| C20 | 1 | 0.5966  | 0.44713 | 0.68002 | Biso | 1 | C | -0.518246 |
| H18 | 1 | 0.6088  | 0.4674  | 0.6986  | Biso | 1 | H | 0.166786  |
| H19 | 1 | 0.5892  | 0.4566  | 0.6544  | Biso | 1 | H | 0.180714  |
| H20 | 1 | 0.6381  | 0.4294  | 0.6888  | Biso | 1 | H | 0.165498  |
| C21 | 1 | 0.70785 | 0.92371 | 0.26809 | Biso | 1 | C | -0.522352 |
| H21 | 1 | 0.7478  | 0.9368  | 0.2638  | Biso | 1 | H | 0.175447  |
| H22 | 1 | 0.6991  | 0.8999  | 0.255   | Biso | 1 | H | 0.192722  |
| H23 | 1 | 0.7233  | 0.92    | 0.296   | Biso | 1 | H | 0.162868  |
| C22 | 1 | 0.7973  | 0.2981  | 0.35213 | Biso | 1 | C | -0.519486 |
| H24 | 1 | 0.8208  | 0.3106  | 0.3772  | Biso | 1 | H | 0.174365  |
| H25 | 1 | 0.8324  | 0.2799  | 0.35    | Biso | 1 | H | 0.190232  |
| H26 | 1 | 0.751   | 0.2859  | 0.3502  | Biso | 1 | H | 0.168136  |
| C23 | 1 | 0.52192 | 0.5075  | 0.15197 | Biso | 1 | C | -0.523996 |
| H27 | 1 | 0.5326  | 0.4986  | 0.1303  | Biso | 1 | H | 0.174376  |
| H28 | 1 | 0.531   | 0.5339  | 0.1549  | Biso | 1 | H | 0.187019  |
| H29 | 1 | 0.4691  | 0.5025  | 0.1468  | Biso | 1 | H | 0.154793  |
| C24 | 1 | 0.3493  | 0.3759  | 0.64266 | Biso | 1 | C | -0.518791 |
| H30 | 1 | 0.3502  | 0.3569  | 0.6612  | Biso | 1 | H | 0.172295  |
| H31 | 1 | 0.3484  | 0.3644  | 0.619   | Biso | 1 | H | 0.188594  |
| H32 | 1 | 0.3041  | 0.391   | 0.6361  | Biso | 1 | H | 0.171789  |
| C25 | 1 | 0.56124 | 0.91899 | 0.18433 | Biso | 1 | C | 0.102586  |
| C26 | 1 | 0.8751  | 0.31242 | 0.29181 | Biso | 1 | C | 0.099212  |
| C27 | 1 | 0.68487 | 0.53176 | 0.21739 | Biso | 1 | C | 0.099797  |
| C28 | 1 | 0.4774  | 0.39432 | 0.61162 | Biso | 1 | C | 0.099738  |
| C29 | 1 | 0.48989 | 0.90603 | 0.16002 | Biso | 1 | C | -0.164086 |
| H33 | 1 | 0.4473  | 0.9132  | 0.1647  | Biso | 1 | H | 0.098366  |
| C30 | 1 | 0.8746  | 0.30152 | 0.25619 | Biso | 1 | C | -0.172796 |
| H34 | 1 | 0.8342  | 0.3088  | 0.2328  | Biso | 1 | H | 0.110544  |

|     |   |         |         |         |      |   |   |           |
|-----|---|---------|---------|---------|------|---|---|-----------|
| C31 | 1 | 0.73195 | 0.54855 | 0.25242 | Biso | 1 | C | -0.184052 |
| H35 | 1 | 0.7375  | 0.538   | 0.2764  | Biso | 1 | H | 0.106159  |
| C32 | 1 | 0.5446  | 0.38167 | 0.6116  | Biso | 1 | C | -0.169685 |
| H36 | 1 | 0.5895  | 0.3831  | 0.6347  | Biso | 1 | H | 0.112926  |
| C33 | 1 | 0.47983 | 0.88297 | 0.12916 | Biso | 1 | C | -0.119665 |
| H37 | 1 | 0.4306  | 0.8749  | 0.1126  | Biso | 1 | H | 0.118152  |
| C34 | 1 | 0.9325  | 0.28015 | 0.25455 | Biso | 1 | C | -0.103989 |
| H38 | 1 | 0.9317  | 0.2731  | 0.2302  | Biso | 1 | H | 0.128523  |
| C35 | 1 | 0.77046 | 0.58043 | 0.25224 | Biso | 1 | C | -0.116908 |
| H39 | 1 | 0.803   | 0.5913  | 0.2761  | Biso | 1 | H | 0.122265  |
| C36 | 1 | 0.5474  | 0.36679 | 0.5779  | Biso | 1 | C | -0.102098 |
| H40 | 1 | 0.5942  | 0.3589  | 0.5782  | Biso | 1 | H | 0.128502  |
| C37 | 1 | 0.54162 | 0.87158 | 0.12247 | Biso | 1 | C | -0.00159  |
| C38 | 1 | 0.992   | 0.26901 | 0.28901 | Biso | 1 | C | -0.003715 |
| C39 | 1 | 0.7615  | 0.59656 | 0.21696 | Biso | 1 | C | -0.001088 |
| C40 | 1 | 0.4819  | 0.36368 | 0.54427 | Biso | 1 | C | -0.003548 |
| C41 | 1 | 0.61378 | 0.8845  | 0.14631 | Biso | 1 | C | -0.092017 |
| H41 | 1 | 0.6564  | 0.8769  | 0.1419  | Biso | 1 | H | 0.132509  |
| C42 | 1 | 0.99425 | 0.28129 | 0.3242  | Biso | 1 | C | -0.101242 |
| H42 | 1 | 0.0353  | 0.2747  | 0.3477  | Biso | 1 | H | 0.128245  |
| C43 | 1 | 0.71709 | 0.58    | 0.18292 | Biso | 1 | C | -0.099788 |
| H43 | 1 | 0.7114  | 0.5909  | 0.1591  | Biso | 1 | H | 0.126435  |
| C44 | 1 | 0.4136  | 0.37732 | 0.54383 | Biso | 1 | C | -0.101481 |
| H44 | 1 | 0.3686  | 0.3758  | 0.5208  | Biso | 1 | H | 0.127453  |
| C45 | 1 | 0.62252 | 0.90833 | 0.17613 | Biso | 1 | C | -0.16573  |
| H45 | 1 | 0.6713  | 0.9178  | 0.1915  | Biso | 1 | H | 0.112136  |
| C46 | 1 | 0.9374  | 0.30302 | 0.32518 | Biso | 1 | C | -0.171417 |
| H46 | 1 | 0.9409  | 0.3119  | 0.3495  | Biso | 1 | H | 0.110014  |
| C47 | 1 | 0.67984 | 0.5473  | 0.18237 | Biso | 1 | C | -0.169985 |
| H47 | 1 | 0.6511  | 0.5355  | 0.1584  | Biso | 1 | H | 0.115985  |
| C48 | 1 | 0.4123  | 0.39276 | 0.57679 | Biso | 1 | C | -0.174382 |
| H48 | 1 | 0.3664  | 0.4026  | 0.5759  | Biso | 1 | H | 0.110633  |
| C49 | 1 | 0.5321  | 0.84464 | 0.09034 | Biso | 1 | C | 0.559964  |
| C50 | 1 | 0.04892 | 0.2421  | 0.2878  | Biso | 1 | C | 0.563434  |
| C51 | 1 | 0.80073 | 0.63192 | 0.21677 | Biso | 1 | C | 0.554054  |
| C52 | 1 | 0.4822  | 0.34252 | 0.51022 | Biso | 1 | C | 0.557472  |
| O1  | 1 | 0.59285 | 0.83066 | 0.09121 | Biso | 1 | O | -0.544674 |
| O2  | 1 | 0.04701 | 0.23367 | 0.25443 | Biso | 1 | O | -0.56193  |
| O3  | 1 | 0.84841 | 0.64355 | 0.2492  | Biso | 1 | O | -0.557653 |
| O4  | 1 | 0.41746 | 0.33386 | 0.48423 | Biso | 1 | O | -0.550952 |
| O5  | 1 | 0.46588 | 0.83741 | 0.0666  | Biso | 1 | O | -0.553723 |
| O6  | 1 | 0.09249 | 0.22863 | 0.31989 | Biso | 1 | O | -0.542734 |
| O7  | 1 | 0.78212 | 0.64733 | 0.18433 | Biso | 1 | O | -0.547216 |
| O8  | 1 | 0.5464  | 0.334   | 0.51092 | Biso | 1 | O | -0.54721  |
| N9  | 1 | 0.70903 | 0.02159 | 0.30306 | Biso | 1 | N | 0.088294  |
| N10 | 1 | 0.59535 | 0.34297 | 0.30875 | Biso | 1 | N | 0.087479  |
| N11 | 1 | 0.50933 | 0.40101 | 0.16458 | Biso | 1 | N | 0.080715  |
| N12 | 1 | 0.43162 | 0.40364 | 0.75682 | Biso | 1 | N | 0.091777  |
| N13 | 1 | 0.66275 | 0.05072 | 0.28787 | Biso | 1 | N | -0.271084 |
| N14 | 1 | 0.55302 | 0.36013 | 0.27506 | Biso | 1 | N | -0.283076 |
| N15 | 1 | 0.55641 | 0.377   | 0.19136 | Biso | 1 | N | -0.260729 |
| N16 | 1 | 0.49398 | 0.4213  | 0.78295 | Biso | 1 | N | -0.287392 |

|     |   |         |         |         |      |   |   |           |
|-----|---|---------|---------|---------|------|---|---|-----------|
| C53 | 1 | 0.7067  | 0.07672 | 0.28325 | Biso | 1 | C | 0.230344  |
| C54 | 1 | 0.48584 | 0.34372 | 0.26175 | Biso | 1 | C | 0.232576  |
| C55 | 1 | 0.5638  | 0.34925 | 0.17023 | Biso | 1 | C | 0.232583  |
| C56 | 1 | 0.51864 | 0.40078 | 0.81537 | Biso | 1 | C | 0.2267    |
| C57 | 1 | 0.78127 | 0.06403 | 0.29559 | Biso | 1 | C | -0.180966 |
| C58 | 1 | 0.48524 | 0.31646 | 0.28778 | Biso | 1 | C | -0.172674 |
| C59 | 1 | 0.5228  | 0.35567 | 0.13074 | Biso | 1 | C | -0.184713 |
| C60 | 1 | 0.46996 | 0.37034 | 0.80966 | Biso | 1 | C | -0.179811 |
| C61 | 1 | 0.78031 | 0.02858 | 0.30793 | Biso | 1 | C | 0.147772  |
| C62 | 1 | 0.55559 | 0.31654 | 0.31748 | Biso | 1 | C | 0.160568  |
| C63 | 1 | 0.4877  | 0.38924 | 0.12772 | Biso | 1 | C | 0.151533  |
| C64 | 1 | 0.41625 | 0.3725  | 0.77193 | Biso | 1 | C | 0.171978  |
| C65 | 1 | 0.6743  | 0.11404 | 0.26824 | Biso | 1 | C | -0.528597 |
| H49 | 1 | 0.663   | 0.1157  | 0.2405  | Biso | 1 | H | 0.176823  |
| H50 | 1 | 0.711   | 0.1329  | 0.2824  | Biso | 1 | H | 0.178965  |
| H51 | 1 | 0.6278  | 0.1176  | 0.2721  | Biso | 1 | H | 0.176365  |
| C66 | 1 | 0.4229  | 0.35572 | 0.22434 | Biso | 1 | C | -0.521855 |
| H52 | 1 | 0.4227  | 0.3824  | 0.2226  | Biso | 1 | H | 0.150874  |
| H53 | 1 | 0.3745  | 0.3474  | 0.2237  | Biso | 1 | H | 0.172398  |
| H54 | 1 | 0.4305  | 0.3451  | 0.2024  | Biso | 1 | H | 0.171717  |
| C67 | 1 | 0.6108  | 0.31663 | 0.19032 | Biso | 1 | C | -0.519337 |
| H55 | 1 | 0.6621  | 0.3196  | 0.1917  | Biso | 1 | H | 0.167229  |
| H56 | 1 | 0.5881  | 0.2944  | 0.1757  | Biso | 1 | H | 0.180237  |
| H57 | 1 | 0.6129  | 0.3147  | 0.2166  | Biso | 1 | H | 0.171859  |
| C68 | 1 | 0.58699 | 0.41098 | 0.84996 | Biso | 1 | C | -0.5231   |
| H58 | 1 | 0.6297  | 0.396   | 0.851   | Biso | 1 | H | 0.17562   |
| H59 | 1 | 0.5782  | 0.4068  | 0.8734  | Biso | 1 | H | 0.176551  |
| H60 | 1 | 0.5984  | 0.4369  | 0.8484  | Biso | 1 | H | 0.15069   |
| C69 | 1 | 0.8427  | 0.00078 | 0.32427 | Biso | 1 | C | -0.514529 |
| H61 | 1 | 0.8574  | 0.9983  | 0.3523  | Biso | 1 | H | 0.168962  |
| H62 | 1 | 0.8864  | 0.0088  | 0.3196  | Biso | 1 | H | 0.191128  |
| H63 | 1 | 0.825   | 0.9771  | 0.3116  | Biso | 1 | H | 0.160347  |
| C70 | 1 | 0.59029 | 0.29332 | 0.35381 | Biso | 1 | C | -0.51665  |
| H64 | 1 | 0.6392  | 0.2839  | 0.3562  | Biso | 1 | H | 0.157824  |
| H65 | 1 | 0.5566  | 0.2728  | 0.3521  | Biso | 1 | H | 0.189673  |
| H66 | 1 | 0.5975  | 0.3082  | 0.3766  | Biso | 1 | H | 0.182966  |
| C71 | 1 | 0.4375  | 0.41076 | 0.09335 | Biso | 1 | C | -0.516258 |
| H67 | 1 | 0.3858  | 0.4102  | 0.0916  | Biso | 1 | H | 0.168028  |
| H68 | 1 | 0.4385  | 0.4002  | 0.0697  | Biso | 1 | H | 0.192199  |
| H69 | 1 | 0.4551  | 0.4361  | 0.0961  | Biso | 1 | H | 0.164461  |
| C72 | 1 | 0.35382 | 0.34727 | 0.74899 | Biso | 1 | C | -0.51631  |
| H70 | 1 | 0.3059  | 0.3607  | 0.7389  | Biso | 1 | H | 0.171465  |
| H71 | 1 | 0.3513  | 0.3273  | 0.7657  | Biso | 1 | H | 0.192192  |
| H72 | 1 | 0.3631  | 0.3373  | 0.7273  | Biso | 1 | H | 0.167484  |
| C73 | 1 | 0.84557 | 0.08452 | 0.29434 | Biso | 1 | C | 0.096653  |
| C74 | 1 | 0.42    | 0.29377 | 0.28551 | Biso | 1 | C | 0.098986  |
| C75 | 1 | 0.5148  | 0.33058 | 0.09808 | Biso | 1 | C | 0.097975  |
| C76 | 1 | 0.47532 | 0.34178 | 0.83836 | Biso | 1 | C | 0.097371  |
| C77 | 1 | 0.9134  | 0.0887  | 0.32674 | Biso | 1 | C | -0.175034 |
| H73 | 1 | 0.92    | 0.0771  | 0.3504  | Biso | 1 | H | 0.10925   |
| C78 | 1 | 0.40277 | 0.29056 | 0.31797 | Biso | 1 | C | -0.151946 |
| H74 | 1 | 0.4329  | 0.303   | 0.3413  | Biso | 1 | H | 0.11496   |

|      |   |         |         |         |      |   |    |           |
|------|---|---------|---------|---------|------|---|----|-----------|
| C79  | 1 | 0.5775  | 0.31542 | 0.09555 | Biso | 1 | C  | -0.169325 |
| H75  | 1 | 0.6262  | 0.3225  | 0.1137  | Biso | 1 | H  | 0.110808  |
| C80  | 1 | 0.54283 | 0.32349 | 0.85938 | Biso | 1 | C  | -0.179418 |
| H76  | 1 | 0.5874  | 0.3301  | 0.8563  | Biso | 1 | H  | 0.110684  |
| C81  | 1 | 0.9711  | 0.10941 | 0.32504 | Biso | 1 | C  | -0.105444 |
| H77  | 1 | 0.0161  | 0.1129  | 0.3478  | Biso | 1 | H  | 0.125286  |
| C82  | 1 | 0.34277 | 0.26955 | 0.31661 | Biso | 1 | C  | -0.088032 |
| H78  | 1 | 0.3329  | 0.2673  | 0.3392  | Biso | 1 | H  | 0.130974  |
| C83  | 1 | 0.5711  | 0.28965 | 0.06671 | Biso | 1 | C  | -0.105589 |
| H79  | 1 | 0.615   | 0.2791  | 0.0657  | Biso | 1 | H  | 0.130217  |
| C84  | 1 | 0.54499 | 0.2955  | 0.88501 | Biso | 1 | C  | -0.11716  |
| H80  | 1 | 0.5912  | 0.2833  | 0.8995  | Biso | 1 | H  | 0.117895  |
| C85  | 1 | 0.96417 | 0.12517 | 0.29028 | Biso | 1 | C  | 0.000146  |
| C86  | 1 | 0.29735 | 0.25193 | 0.28324 | Biso | 1 | C  | -0.012747 |
| C87  | 1 | 0.5007  | 0.27985 | 0.03997 | Biso | 1 | C  | 0.000968  |
| C88  | 1 | 0.48017 | 0.28538 | 0.88939 | Biso | 1 | C  | -0.017268 |
| C89  | 1 | 0.8985  | 0.12072 | 0.25771 | Biso | 1 | C  | -0.10156  |
| H81  | 1 | 0.8935  | 0.131   | 0.2337  | Biso | 1 | H  | 0.130015  |
| C90  | 1 | 0.3121  | 0.25513 | 0.24998 | Biso | 1 | C  | -0.118332 |
| H82  | 1 | 0.2807  | 0.2431  | 0.2266  | Biso | 1 | H  | 0.120477  |
| C91  | 1 | 0.4363  | 0.29569 | 0.04125 | Biso | 1 | C  | -0.103786 |
| H83  | 1 | 0.3874  | 0.2896  | 0.0224  | Biso | 1 | H  | 0.131175  |
| C92  | 1 | 0.41243 | 0.30395 | 0.86905 | Biso | 1 | C  | -0.085538 |
| H84  | 1 | 0.3681  | 0.2973  | 0.8724  | Biso | 1 | H  | 0.133036  |
| C93  | 1 | 0.839   | 0.10101 | 0.26005 | Biso | 1 | C  | -0.166521 |
| H85  | 1 | 0.793   | 0.0988  | 0.2376  | Biso | 1 | H  | 0.110175  |
| C94  | 1 | 0.37316 | 0.27603 | 0.2515  | Biso | 1 | C  | -0.180539 |
| H86  | 1 | 0.3831  | 0.2782  | 0.2289  | Biso | 1 | H  | 0.109714  |
| C95  | 1 | 0.4453  | 0.32069 | 0.07082 | Biso | 1 | C  | -0.175148 |
| H87  | 1 | 0.4016  | 0.3312  | 0.0721  | Biso | 1 | H  | 0.105492  |
| C96  | 1 | 0.41035 | 0.33211 | 0.84398 | Biso | 1 | C  | -0.155364 |
| H88  | 1 | 0.3645  | 0.345   | 0.8305  | Biso | 1 | H  | 0.117554  |
| C97  | 1 | 0.0269  | 0.1486  | 0.2889  | Biso | 1 | C  | 0.564614  |
| C98  | 1 | 0.23355 | 0.22886 | 0.28268 | Biso | 1 | C  | 0.566393  |
| C99  | 1 | 0.4928  | 0.25146 | 0.01005 | Biso | 1 | C  | 0.561962  |
| C100 | 1 | 0.48107 | 0.25393 | 0.91528 | Biso | 1 | C  | 0.570397  |
| O9   | 1 | 0.08276 | 0.15452 | 0.32052 | Biso | 1 | O  | -0.552813 |
| O10  | 1 | 0.23122 | 0.22291 | 0.31526 | Biso | 1 | O  | -0.544691 |
| O11  | 1 | 0.5536  | 0.24022 | 0.00845 | Biso | 1 | O  | -0.554707 |
| O12  | 1 | 0.41871 | 0.24507 | 0.9158  | Biso | 1 | O  | -0.542802 |
| O13  | 1 | 0.01854 | 0.16079 | 0.25605 | Biso | 1 | O  | -0.555271 |
| O14  | 1 | 0.18595 | 0.21714 | 0.25018 | Biso | 1 | O  | -0.564333 |
| O15  | 1 | 0.42705 | 0.24032 | 0.98942 | Biso | 1 | O  | -0.544701 |
| O16  | 1 | 0.54324 | 0.23855 | 0.93385 | Biso | 1 | O  | -0.561344 |
| Cu7  | 1 | 0.90359 | 0.68928 | 0.25297 | Biso | 1 | Cu | 0.717012  |
| C101 | 1 | 0.32452 | 0.48846 | 0.19015 | Biso | 1 | C  | -0.055644 |
| H89  | 1 | 0.2843  | 0.4707  | 0.1758  | Biso | 1 | H  | 0.122185  |
| H90  | 1 | 0.3524  | 0.4941  | 0.174   | Biso | 1 | H  | 0.109111  |
| C102 | 1 | 0.32866 | 0.8559  | 0.1691  | Biso | 1 | C  | -0.051915 |
| H91  | 1 | 0.3076  | 0.8436  | 0.1435  | Biso | 1 | H  | 0.130759  |
| H92  | 1 | 0.3299  | 0.8825  | 0.1645  | Biso | 1 | H  | 0.115077  |
| C103 | 1 | 0.5121  | 0.93387 | 0.32053 | Biso | 1 | C  | -0.057697 |

|      |   |         |         |         |         |         |      |          |    |           |
|------|---|---------|---------|---------|---------|---------|------|----------|----|-----------|
| H93  | 1 | 0.5502  | 0.9476  | 0.3423  | Biso    | 1       | H    | 0.115153 |    |           |
| H94  | 1 | 0.5351  | 0.9269  | 0.3025  | Biso    | 1       | H    | 0.105373 |    |           |
| C104 | 1 | 0.60716 |         | 0.91904 |         | 0.78151 | Biso | 1        | C  | -0.059275 |
| H95  | 1 | 0.6169  | 0.9453  | 0.7791  | Biso    | 1       | H    | 0.104739 |    |           |
| H96  | 1 | 0.6565  | 0.9067  | 0.7948  | Biso    | 1       | H    | 0.126808 |    |           |
| Cu8  | 1 | 0.83799 |         | 0.68876 |         | 0.17661 | Biso | 1        | Cu | 0.725964  |
| Cu9  | 1 | 0.59307 |         | 0.70514 |         | 0.55284 | Biso | 1        | Cu | 0.746249  |
| Cu10 | 1 | 0.44506 |         | 0.7009  | 0.52691 |         | Biso | 1        | Cu | 0.697306  |
| Cu11 | 1 | 0.45211 |         | 0.95667 |         | 0.73778 | Biso | 1        | Cu | 0.221652  |
| Cu12 | 1 | 0.39499 |         | 0.89218 |         | 0.25078 | Biso | 1        | Cu | 0.21322   |
| N17  | 1 | 0.37552 |         | 0.47255 |         | 0.22652 | Biso | 1        | N  | 0.071542  |
| N18  | 1 | 0.28008 |         | 0.84895 |         | 0.18903 | Biso | 1        | N  | 0.088309  |
| N19  | 1 | 0.44751 |         | 0.9568  | 0.30059 |         | Biso | 1        | N  | 0.096023  |
| N20  | 1 | 0.56351 |         | 0.91518 |         | 0.80501 | Biso | 1        | N  | 0.077408  |
| N21  | 1 | 0.44508 |         | 0.48856 |         | 0.24593 | Biso | 1        | N  | -0.290757 |
| N22  | 1 | 0.28859 |         | 0.87026 |         | 0.22021 | Biso | 1        | N  | -0.280049 |
| N23  | 1 | 0.39493 |         | 0.94531 |         | 0.26572 | Biso | 1        | N  | -0.264364 |
| N24  | 1 | 0.49744 |         | 0.93409 |         | 0.79386 | Biso | 1        | N  | -0.265912 |
| C105 | 1 | 0.47767 |         | 0.47049 |         | 0.27975 | Biso | 1        | C  | 0.241225  |
| C106 | 1 | 0.23411 |         | 0.85971 |         | 0.23086 | Biso | 1        | C  | 0.228439  |
| C107 | 1 | 0.34022 |         | 0.97052 |         | 0.25458 | Biso | 1        | C  | 0.229829  |
| C108 | 1 | 0.4752  | 0.9286  | 0.82265 |         |         | Biso | 1        | C  | 0.229083  |
| C109 | 1 | 0.4269  | 0.4435  | 0.28259 |         |         | Biso | 1        | C  | -0.178259 |
| C110 | 1 | 0.18955 |         | 0.83187 |         | 0.20645 | Biso | 1        | C  | -0.181371 |
| C111 | 1 | 0.35878 |         | 0.99848 |         | 0.28299 | Biso | 1        | C  | -0.195331 |
| C112 | 1 | 0.5269  | 0.90692 |         | 0.852   |         | Biso | 1        | C  | -0.187272 |
| C113 | 1 | 0.36301 |         | 0.44562 |         | 0.24784 | Biso | 1        | C  | 0.152269  |
| C114 | 1 | 0.22136 |         | 0.82532 |         | 0.17993 | Biso | 1        | C  | 0.154556  |
| C115 | 1 | 0.42829 |         | 0.98877 |         | 0.31193 | Biso | 1        | C  | 0.158008  |
| C116 | 1 | 0.5838  | 0.89865 |         | 0.84002 |         | Biso | 1        | C  | 0.166854  |
| C117 | 1 | 0.55511 |         | 0.48003 |         | 0.30778 | Biso | 1        | C  | -0.52214  |
| H97  | 1 | 0.5902  | 0.4607  | 0.3079  | Biso    | 1       | H    | 0.161965 |    |           |
| H98  | 1 | 0.556   | 0.4825  | 0.3338  | Biso    | 1       | H    | 0.182824 |    |           |
| H99  | 1 | 0.5703  | 0.5032  | 0.3001  | Biso    | 1       | H    | 0.159403 |    |           |
| C118 | 1 | 0.2255  | 0.87881 |         | 0.26447 |         | Biso | 1        | C  | -0.520402 |
| H100 | 1 | 0.2455  | 0.8631  | 0.2875  | Biso    | 1       | H    | 0.167706 |    |           |
| H101 | 1 | 0.1719  | 0.8837  | 0.2576  | Biso    | 1       | H    | 0.178543 |    |           |
| H102 | 1 | 0.2534  | 0.9019  | 0.27    | Biso    | 1       | H    | 0.171547 |    |           |
| C119 | 1 | 0.27245 |         | 0.96606 |         | 0.21741 | Biso | 1        | C  | -0.520484 |
| H103 | 1 | 0.2761  | 0.9826  | 0.1978  | Biso    | 1       | H    | 0.167745 |    |           |
| H104 | 1 | 0.227   | 0.9719  | 0.2215  | Biso    | 1       | H    | 0.18161  |    |           |
| H105 | 1 | 0.2696  | 0.9408  | 0.2084  | Biso    | 1       | H    | 0.162485 |    |           |
| C120 | 1 | 0.4034  | 0.94713 |         | 0.81998 |         | Biso | 1        | C  | -0.519155 |
| H106 | 1 | 0.3912  | 0.9674  | 0.8014  | Biso    | 1       | H    | 0.167657 |    |           |
| H107 | 1 | 0.4108  | 0.9566  | 0.8456  | Biso    | 1       | H    | 0.180247 |    |           |
| H108 | 1 | 0.3619  | 0.9294  | 0.8112  | Biso    | 1       | H    | 0.165501 |    |           |
| C121 | 1 | 0.29215 |         | 0.42371 |         | 0.23191 | Biso | 1        | C  | -0.522436 |
| H109 | 1 | 0.2522  | 0.4368  | 0.2362  | Biso    | 1       | H    | 0.175552 |    |           |
| H110 | 1 | 0.3009  | 0.3999  | 0.245   | Biso    | 1       | H    | 0.192216 |    |           |
| H111 | 1 | 0.2767  | 0.42    | 0.204   | Biso    | 1       | H    | 0.163318 |    |           |
| C122 | 1 | 0.2027  | 0.7981  | 0.14787 |         |         | Biso | 1        | C  | -0.519245 |
| H112 | 1 | 0.1792  | 0.8106  | 0.1228  | Biso    | 1       | H    | 0.17436  |    |           |

|      |   |         |         |         |         |      |      |          |           |           |
|------|---|---------|---------|---------|---------|------|------|----------|-----------|-----------|
| H113 | 1 | 0.1676  | 0.7799  | 0.15    | Biso    | 1    | H    | 0.190466 |           |           |
| H114 | 1 | 0.249   | 0.7859  | 0.1498  | Biso    | 1    | H    | 0.168139 |           |           |
| C123 | 1 | 0.47808 |         | 0.0075  | 0.34803 |      | Biso | 1        | C         | -0.524205 |
| H115 | 1 | 0.4674  | 0.9986  | 0.3697  | Biso    | 1    | H    | 0.174513 |           |           |
| H116 | 1 | 0.469   | 0.0339  | 0.3451  | Biso    | 1    | H    | 0.186942 |           |           |
| H117 | 1 | 0.5309  | 0.0025  | 0.3532  | Biso    | 1    | H    | 0.155237 |           |           |
| C124 | 1 | 0.6507  | 0.8759  | 0.85734 |         | Biso | 1    | C        | -0.518847 |           |
| H118 | 1 | 0.6498  | 0.8569  | 0.8388  | Biso    | 1    | H    | 0.172608 |           |           |
| H119 | 1 | 0.6516  | 0.8644  | 0.881   | Biso    | 1    | H    | 0.188301 |           |           |
| H120 | 1 | 0.6959  | 0.891   | 0.8639  | Biso    | 1    | H    | 0.171664 |           |           |
| C125 | 1 | 0.43876 |         | 0.41899 | 0.31567 |      | Biso | 1        | C         | 0.104079  |
| C126 | 1 | 0.1249  | 0.81242 |         | 0.20819 |      | Biso | 1        | C         | 0.0981    |
| C127 | 1 | 0.31513 |         | 0.03176 | 0.28261 |      | Biso | 1        | C         | 0.102337  |
| C128 | 1 | 0.5226  | 0.89432 |         | 0.88838 |      | Biso | 1        | C         | 0.09897   |
| C129 | 1 | 0.51011 |         | 0.40603 | 0.33998 |      | Biso | 1        | C         | -0.163949 |
| H121 | 1 | 0.5527  | 0.4132  | 0.3353  | Biso    | 1    | H    | 0.098741 |           |           |
| C130 | 1 | 0.1254  | 0.80152 |         | 0.24381 |      | Biso | 1        | C         | -0.173785 |
| H122 | 1 | 0.1658  | 0.8088  | 0.2672  | Biso    | 1    | H    | 0.109826 |           |           |
| C131 | 1 | 0.26805 |         | 0.04855 | 0.24758 |      | Biso | 1        | C         | -0.182941 |
| H123 | 1 | 0.2625  | 0.038   | 0.2236  | Biso    | 1    | H    | 0.107078 |           |           |
| C132 | 1 | 0.4554  | 0.88167 |         | 0.8884  |      | Biso | 1        | C         | -0.169431 |
| H124 | 1 | 0.4105  | 0.8831  | 0.8653  | Biso    | 1    | H    | 0.112802 |           |           |
| C133 | 1 | 0.52017 |         | 0.38297 | 0.37084 |      | Biso | 1        | C         | -0.119191 |
| H125 | 1 | 0.5694  | 0.3749  | 0.3874  | Biso    | 1    | H    | 0.118152 |           |           |
| C134 | 1 | 0.0675  | 0.78015 |         | 0.24545 |      | Biso | 1        | C         | -0.104679 |
| H126 | 1 | 0.0683  | 0.7731  | 0.2698  | Biso    | 1    | H    | 0.128071 |           |           |
| C135 | 1 | 0.22954 |         | 0.08043 | 0.24776 |      | Biso | 1        | C         | -0.115005 |
| H127 | 1 | 0.197   | 0.0913  | 0.2239  | Biso    | 1    | H    | 0.123178 |           |           |
| C136 | 1 | 0.4526  | 0.86679 |         | 0.9221  |      | Biso | 1        | C         | -0.102739 |
| H128 | 1 | 0.4058  | 0.8589  | 0.9218  | Biso    | 1    | H    | 0.128357 |           |           |
| C137 | 1 | 0.45838 |         | 0.37158 | 0.37753 |      | Biso | 1        | C         | -0.002399 |
| C138 | 1 | 0.008   | 0.76901 |         | 0.21099 |      | Biso | 1        | C         | -0.003438 |
| C139 | 1 | 0.2385  | 0.09656 |         | 0.28304 |      | Biso | 1        | C         | -8.5E-05  |
| C140 | 1 | 0.5181  | 0.86368 |         | 0.95573 |      | Biso | 1        | C         | -0.002984 |
| C141 | 1 | 0.38622 |         | 0.3845  | 0.35369 |      | Biso | 1        | C         | -0.092084 |
| H129 | 1 | 0.3436  | 0.3769  | 0.3581  | Biso    | 1    | H    | 0.132325 |           |           |
| C142 | 1 | 0.00575 |         | 0.78129 | 0.1758  |      | Biso | 1        | C         | -0.101096 |
| H130 | 1 | 0.9647  | 0.7747  | 0.1523  | Biso    | 1    | H    | 0.128428 |           |           |
| C143 | 1 | 0.28291 |         | 0.08    | 0.31708 |      | Biso | 1        | C         | -0.099404 |
| H131 | 1 | 0.2886  | 0.0909  | 0.3409  | Biso    | 1    | H    | 0.1265   |           |           |
| C144 | 1 | 0.5864  | 0.87732 |         | 0.95617 |      | Biso | 1        | C         | -0.101494 |
| H132 | 1 | 0.6314  | 0.8758  | 0.9792  | Biso    | 1    | H    | 0.127246 |           |           |
| C145 | 1 | 0.37748 |         | 0.40833 | 0.32387 |      | Biso | 1        | C         | -0.165464 |
| H133 | 1 | 0.3287  | 0.4178  | 0.3085  | Biso    | 1    | H    | 0.112601 |           |           |
| C146 | 1 | 0.0626  | 0.80302 |         | 0.17482 |      | Biso | 1        | C         | -0.17174  |
| H134 | 1 | 0.0591  | 0.8119  | 0.1505  | Biso    | 1    | H    | 0.109848 |           |           |
| C147 | 1 | 0.32016 |         | 0.0473  | 0.31763 |      | Biso | 1        | C         | -0.168525 |
| H135 | 1 | 0.3489  | 0.0355  | 0.3416  | Biso    | 1    | H    | 0.11641  |           |           |
| C148 | 1 | 0.5877  | 0.89276 |         | 0.92321 |      | Biso | 1        | C         | -0.174652 |
| H136 | 1 | 0.6336  | 0.9026  | 0.9241  | Biso    | 1    | H    | 0.110586 |           |           |
| C149 | 1 | 0.4679  | 0.34464 |         | 0.40966 |      | Biso | 1        | C         | 0.560941  |
| C150 | 1 | 0.95108 |         | 0.7421  | 0.2122  |      | Biso | 1        | C         | 0.562799  |

|      |   |         |         |         |      |   |   |           |
|------|---|---------|---------|---------|------|---|---|-----------|
| C151 | 1 | 0.19927 | 0.13192 | 0.28323 | Biso | 1 | C | 0.555003  |
| C152 | 1 | 0.5178  | 0.84252 | 0.98978 | Biso | 1 | C | 0.556985  |
| O17  | 1 | 0.40715 | 0.33066 | 0.40879 | Biso | 1 | O | -0.544851 |
| O18  | 1 | 0.95299 | 0.73367 | 0.24557 | Biso | 1 | O | -0.563801 |
| O19  | 1 | 0.15159 | 0.14355 | 0.2508  | Biso | 1 | O | -0.555118 |
| O20  | 1 | 0.58254 | 0.83386 | 0.01577 | Biso | 1 | O | -0.551036 |
| O21  | 1 | 0.53412 | 0.33741 | 0.4334  | Biso | 1 | O | -0.553374 |
| O22  | 1 | 0.90751 | 0.72863 | 0.18011 | Biso | 1 | O | -0.543116 |
| O23  | 1 | 0.21788 | 0.14733 | 0.31567 | Biso | 1 | O | -0.546326 |
| O24  | 1 | 0.4536  | 0.834   | 0.98908 | Biso | 1 | O | -0.548327 |
| N25  | 1 | 0.29097 | 0.52159 | 0.19694 | Biso | 1 | N | 0.090995  |
| N26  | 1 | 0.40465 | 0.84297 | 0.19125 | Biso | 1 | N | 0.087478  |
| N27  | 1 | 0.49067 | 0.90101 | 0.33542 | Biso | 1 | N | 0.080378  |
| N28  | 1 | 0.56838 | 0.90364 | 0.74318 | Biso | 1 | N | 0.091394  |
| N29  | 1 | 0.33725 | 0.55072 | 0.21213 | Biso | 1 | N | -0.272661 |
| N30  | 1 | 0.44698 | 0.86013 | 0.22494 | Biso | 1 | N | -0.284005 |
| N31  | 1 | 0.44359 | 0.877   | 0.30864 | Biso | 1 | N | -0.259655 |
| N32  | 1 | 0.50602 | 0.9213  | 0.71705 | Biso | 1 | N | -0.287128 |
| C153 | 1 | 0.2933  | 0.57672 | 0.21675 | Biso | 1 | C | 0.230632  |
| C154 | 1 | 0.51416 | 0.84372 | 0.23825 | Biso | 1 | C | 0.232561  |
| C155 | 1 | 0.4362  | 0.84925 | 0.32977 | Biso | 1 | C | 0.232858  |
| C156 | 1 | 0.48136 | 0.90078 | 0.68463 | Biso | 1 | C | 0.226542  |
| C157 | 1 | 0.21873 | 0.56403 | 0.20441 | Biso | 1 | C | -0.180266 |
| C158 | 1 | 0.51476 | 0.81646 | 0.21222 | Biso | 1 | C | -0.171425 |
| C159 | 1 | 0.4772  | 0.85567 | 0.36926 | Biso | 1 | C | -0.184802 |
| C160 | 1 | 0.53004 | 0.87034 | 0.69034 | Biso | 1 | C | -0.179853 |
| C161 | 1 | 0.21969 | 0.52858 | 0.19207 | Biso | 1 | C | 0.146429  |
| C162 | 1 | 0.44441 | 0.81654 | 0.18252 | Biso | 1 | C | 0.160683  |
| C163 | 1 | 0.5123  | 0.88924 | 0.37228 | Biso | 1 | C | 0.151032  |
| C164 | 1 | 0.58375 | 0.8725  | 0.72807 | Biso | 1 | C | 0.172017  |
| C165 | 1 | 0.3257  | 0.61404 | 0.23176 | Biso | 1 | C | -0.528402 |
| H137 | 1 | 0.337   | 0.6157  | 0.2595  | Biso | 1 | H | 0.176374  |
| H138 | 1 | 0.289   | 0.6329  | 0.2176  | Biso | 1 | H | 0.179305  |
| H139 | 1 | 0.3722  | 0.6176  | 0.2279  | Biso | 1 | H | 0.176389  |
| C166 | 1 | 0.5771  | 0.85572 | 0.27566 | Biso | 1 | C | -0.521922 |
| H140 | 1 | 0.5773  | 0.8824  | 0.2774  | Biso | 1 | H | 0.150437  |
| H141 | 1 | 0.6255  | 0.8474  | 0.2763  | Biso | 1 | H | 0.172573  |
| H142 | 1 | 0.5695  | 0.8451  | 0.2976  | Biso | 1 | H | 0.171232  |
| C167 | 1 | 0.3892  | 0.81663 | 0.30968 | Biso | 1 | C | -0.519421 |
| H143 | 1 | 0.3379  | 0.8196  | 0.3083  | Biso | 1 | H | 0.167513  |
| H144 | 1 | 0.4119  | 0.7944  | 0.3243  | Biso | 1 | H | 0.180267  |
| H145 | 1 | 0.3871  | 0.8147  | 0.2834  | Biso | 1 | H | 0.172557  |
| C168 | 1 | 0.41301 | 0.91098 | 0.65004 | Biso | 1 | C | -0.523136 |
| H146 | 1 | 0.3703  | 0.896   | 0.649   | Biso | 1 | H | 0.17563   |
| H147 | 1 | 0.4218  | 0.9068  | 0.6266  | Biso | 1 | H | 0.176997  |
| H148 | 1 | 0.4016  | 0.9369  | 0.6516  | Biso | 1 | H | 0.15065   |
| C169 | 1 | 0.1573  | 0.50078 | 0.17573 | Biso | 1 | C | -0.51431  |
| H149 | 1 | 0.1426  | 0.4983  | 0.1477  | Biso | 1 | H | 0.169225  |
| H150 | 1 | 0.1136  | 0.5088  | 0.1804  | Biso | 1 | H | 0.191255  |
| H151 | 1 | 0.175   | 0.4771  | 0.1884  | Biso | 1 | H | 0.15986   |
| C170 | 1 | 0.40971 | 0.79332 | 0.14619 | Biso | 1 | C | -0.520875 |
| H152 | 1 | 0.3608  | 0.7839  | 0.1438  | Biso | 1 | H | 0.157564  |

|      |   |         |         |         |      |   |   |           |  |
|------|---|---------|---------|---------|------|---|---|-----------|--|
| H153 | 1 | 0.4434  | 0.7728  | 0.1479  | Biso | 1 | H | 0.195314  |  |
| H154 | 1 | 0.4025  | 0.8082  | 0.1234  | Biso | 1 | H | 0.183129  |  |
| C171 | 1 | 0.5625  | 0.91076 | 0.40665 | Biso | 1 | C | -0.516103 |  |
| H155 | 1 | 0.6142  | 0.9102  | 0.4084  | Biso | 1 | H | 0.168074  |  |
| H156 | 1 | 0.5615  | 0.9002  | 0.4303  | Biso | 1 | H | 0.191827  |  |
| H157 | 1 | 0.5449  | 0.9361  | 0.4039  | Biso | 1 | H | 0.164178  |  |
| C172 | 1 | 0.64618 | 0.84727 | 0.75101 | Biso | 1 | C | -0.516342 |  |
| H158 | 1 | 0.6941  | 0.8607  | 0.7611  | Biso | 1 | H | 0.171206  |  |
| H159 | 1 | 0.6487  | 0.8273  | 0.7343  | Biso | 1 | H | 0.192412  |  |
| H160 | 1 | 0.6369  | 0.8373  | 0.7727  | Biso | 1 | H | 0.167264  |  |
| C173 | 1 | 0.15443 | 0.58452 | 0.20566 | Biso | 1 | C | 0.095698  |  |
| C174 | 1 | 0.58    | 0.79377 | 0.21449 | Biso | 1 | C | 0.095618  |  |
| C175 | 1 | 0.4852  | 0.83058 | 0.40192 | Biso | 1 | C | 0.098536  |  |
| C176 | 1 | 0.52468 | 0.84178 | 0.66164 | Biso | 1 | C | 0.097899  |  |
| C177 | 1 | 0.0866  | 0.5887  | 0.17326 | Biso | 1 | C | -0.175472 |  |
| H161 | 1 | 0.08    | 0.5771  | 0.1496  | Biso | 1 | H | 0.109281  |  |
| C178 | 1 | 0.59723 | 0.79056 | 0.18203 | Biso | 1 | C | -0.151636 |  |
| H162 | 1 | 0.5671  | 0.803   | 0.1587  | Biso | 1 | H | 0.115011  |  |
| C179 | 1 | 0.4225  | 0.81542 | 0.40445 | Biso | 1 | C | -0.169136 |  |
| H163 | 1 | 0.3738  | 0.8225  | 0.3863  | Biso | 1 | H | 0.111246  |  |
| C180 | 1 | 0.45717 | 0.82349 | 0.64062 | Biso | 1 | C | -0.179345 |  |
| H164 | 1 | 0.4126  | 0.8301  | 0.6437  | Biso | 1 | H | 0.110608  |  |
| C181 | 1 | 0.0289  | 0.60941 | 0.17496 | Biso | 1 | C | -0.105154 |  |
| H165 | 1 | 0.9839  | 0.6129  | 0.1522  | Biso | 1 | H | 0.12542   |  |
| C182 | 1 | 0.65723 | 0.76955 | 0.18339 | Biso | 1 | C | -0.087628 |  |
| H166 | 1 | 0.6671  | 0.7673  | 0.1608  | Biso | 1 | H | 0.131385  |  |
| C183 | 1 | 0.4289  | 0.78965 | 0.43329 | Biso | 1 | C | -0.10486  |  |
| H167 | 1 | 0.385   | 0.7791  | 0.4343  | Biso | 1 | H | 0.130463  |  |
| C184 | 1 | 0.45501 | 0.7955  | 0.61499 | Biso | 1 | C | -0.116266 |  |
| H168 | 1 | 0.4088  | 0.7833  | 0.6005  | Biso | 1 | H | 0.118111  |  |
| C185 | 1 | 0.03583 | 0.62517 | 0.20972 | Biso | 1 | C | 0.000156  |  |
| C186 | 1 | 0.70265 | 0.75193 | 0.21676 | Biso | 1 | C | -0.012763 |  |
| C187 | 1 | 0.4993  | 0.77985 | 0.46003 | Biso | 1 | C | 0.000197  |  |
| C188 | 1 | 0.51983 | 0.78538 | 0.61061 | Biso | 1 | C | -0.017626 |  |
| C189 | 1 | 0.1015  | 0.62072 | 0.24229 | Biso | 1 | C | -0.101776 |  |
| H169 | 1 | 0.1065  | 0.631   | 0.2663  | Biso | 1 | H | 0.129457  |  |
| C190 | 1 | 0.6879  | 0.75513 | 0.25002 | Biso | 1 | C | -0.119066 |  |
| H170 | 1 | 0.7193  | 0.7431  | 0.2734  | Biso | 1 | H | 0.120044  |  |
| C191 | 1 | 0.5637  | 0.79569 | 0.45875 | Biso | 1 | C | -0.103801 |  |
| H171 | 1 | 0.6126  | 0.7896  | 0.4776  | Biso | 1 | H | 0.131033  |  |
| C192 | 1 | 0.58757 | 0.80395 | 0.63095 | Biso | 1 | C | -0.085636 |  |
| H172 | 1 | 0.6319  | 0.7973  | 0.6276  | Biso | 1 | H | 0.13329   |  |
| C193 | 1 | 0.161   | 0.60101 | 0.23995 | Biso | 1 | C | -0.167271 |  |
| H173 | 1 | 0.207   | 0.5988  | 0.2624  | Biso | 1 | H | 0.109511  |  |
| C194 | 1 | 0.62684 | 0.77603 | 0.2485  | Biso | 1 | C | -0.180492 |  |
| H174 | 1 | 0.6169  | 0.7782  | 0.2711  | Biso | 1 | H | 0.10894   |  |
| C195 | 1 | 0.5547  | 0.82069 | 0.42918 | Biso | 1 | C | -0.174793 |  |
| H175 | 1 | 0.5984  | 0.8312  | 0.4279  | Biso | 1 | H | 0.105657  |  |
| C196 | 1 | 0.58965 | 0.83211 | 0.65602 | Biso | 1 | C | -0.15587  |  |
| H176 | 1 | 0.6355  | 0.845   | 0.6695  | Biso | 1 | H | 0.117368  |  |
| C197 | 1 | 0.9731  | 0.6486  | 0.2111  | Biso | 1 | C | 0.564587  |  |
| C198 | 1 | 0.76645 | 0.72886 | 0.21732 | Biso | 1 | C | 0.566406  |  |

|      |   |         |         |         |      |   |    |           |
|------|---|---------|---------|---------|------|---|----|-----------|
| C199 | 1 | 0.5072  | 0.75146 | 0.48995 | Biso | 1 | C  | 0.562379  |
| C200 | 1 | 0.51893 | 0.75393 | 0.58472 | Biso | 1 | C  | 0.570294  |
| O25  | 1 | 0.91724 | 0.65452 | 0.17948 | Biso | 1 | O  | -0.552722 |
| O26  | 1 | 0.76878 | 0.72291 | 0.18474 | Biso | 1 | O  | -0.545289 |
| O27  | 1 | 0.4464  | 0.74022 | 0.49155 | Biso | 1 | O  | -0.553825 |
| O28  | 1 | 0.58129 | 0.74507 | 0.5842  | Biso | 1 | O  | -0.542091 |
| O29  | 1 | 0.98146 | 0.66079 | 0.24395 | Biso | 1 | O  | -0.556453 |
| O30  | 1 | 0.81405 | 0.71714 | 0.24982 | Biso | 1 | O  | -0.566465 |
| O31  | 1 | 0.57295 | 0.74032 | 0.51058 | Biso | 1 | O  | -0.543997 |
| O32  | 1 | 0.45676 | 0.73855 | 0.56615 | Biso | 1 | O  | -0.560484 |
| Cu13 | 1 | 0.90359 | 0.81072 | 0.75297 | Biso | 1 | Cu | 0.716212  |
| C201 | 1 | 0.32452 | 0.01154 | 0.69015 | Biso | 1 | C  | -0.055783 |
| H177 | 1 | 0.2843  | 0.0293  | 0.6758  | Biso | 1 | H  | 0.122274  |
| H178 | 1 | 0.3524  | 0.0059  | 0.674   | Biso | 1 | H  | 0.109084  |
| C202 | 1 | 0.32866 | 0.6441  | 0.6691  | Biso | 1 | C  | -0.051768 |
| H179 | 1 | 0.3076  | 0.6564  | 0.6435  | Biso | 1 | H  | 0.130946  |
| H180 | 1 | 0.3299  | 0.6175  | 0.6645  | Biso | 1 | H  | 0.11541   |
| C203 | 1 | 0.5121  | 0.56613 | 0.82053 | Biso | 1 | C  | -0.057921 |
| H181 | 1 | 0.5502  | 0.5524  | 0.8423  | Biso | 1 | H  | 0.115081  |
| H182 | 1 | 0.5351  | 0.5731  | 0.8025  | Biso | 1 | H  | 0.105294  |
| C204 | 1 | 0.60716 | 0.58096 | 0.28151 | Biso | 1 | C  | -0.059279 |
| H183 | 1 | 0.6169  | 0.5547  | 0.2791  | Biso | 1 | H  | 0.104902  |
| H184 | 1 | 0.6565  | 0.5933  | 0.2948  | Biso | 1 | H  | 0.12693   |
| Cu14 | 1 | 0.83799 | 0.81124 | 0.67661 | Biso | 1 | Cu | 0.735182  |
| Cu15 | 1 | 0.59307 | 0.79486 | 0.05284 | Biso | 1 | Cu | 0.736934  |
| Cu16 | 1 | 0.44506 | 0.7991  | 0.02691 | Biso | 1 | Cu | 0.708521  |
| Cu17 | 1 | 0.45211 | 0.54333 | 0.23778 | Biso | 1 | Cu | 0.222511  |
| Cu18 | 1 | 0.39499 | 0.60782 | 0.75078 | Biso | 1 | Cu | 0.213274  |
| N33  | 1 | 0.37552 | 0.02745 | 0.72652 | Biso | 1 | N  | 0.071011  |
| N34  | 1 | 0.28008 | 0.65105 | 0.68903 | Biso | 1 | N  | 0.088357  |
| N35  | 1 | 0.44751 | 0.5432  | 0.80059 | Biso | 1 | N  | 0.095823  |
| N36  | 1 | 0.56351 | 0.58482 | 0.30501 | Biso | 1 | N  | 0.0777    |
| N37  | 1 | 0.44508 | 0.01144 | 0.74593 | Biso | 1 | N  | -0.291465 |
| N38  | 1 | 0.28859 | 0.62974 | 0.72021 | Biso | 1 | N  | -0.279209 |
| N39  | 1 | 0.39493 | 0.55469 | 0.76572 | Biso | 1 | N  | -0.265307 |
| N40  | 1 | 0.49744 | 0.56591 | 0.29386 | Biso | 1 | N  | -0.265882 |
| C205 | 1 | 0.47767 | 0.02951 | 0.77975 | Biso | 1 | C  | 0.24112   |
| C206 | 1 | 0.23411 | 0.64029 | 0.73086 | Biso | 1 | C  | 0.228704  |
| C207 | 1 | 0.34022 | 0.52948 | 0.75458 | Biso | 1 | C  | 0.229448  |
| C208 | 1 | 0.4752  | 0.5714  | 0.32265 | Biso | 1 | C  | 0.228897  |
| C209 | 1 | 0.4269  | 0.0565  | 0.78259 | Biso | 1 | C  | -0.17742  |
| C210 | 1 | 0.18955 | 0.66813 | 0.70645 | Biso | 1 | C  | -0.182146 |
| C211 | 1 | 0.35878 | 0.50152 | 0.78299 | Biso | 1 | C  | -0.194858 |
| C212 | 1 | 0.5269  | 0.59308 | 0.352   | Biso | 1 | C  | -0.187849 |
| C213 | 1 | 0.36301 | 0.05438 | 0.74784 | Biso | 1 | C  | 0.151819  |
| C214 | 1 | 0.22136 | 0.67468 | 0.67993 | Biso | 1 | C  | 0.154378  |
| C215 | 1 | 0.42829 | 0.51123 | 0.81193 | Biso | 1 | C  | 0.15681   |
| C216 | 1 | 0.5838  | 0.60135 | 0.34002 | Biso | 1 | C  | 0.166968  |
| C217 | 1 | 0.55511 | 0.01997 | 0.80778 | Biso | 1 | C  | -0.52221  |
| H185 | 1 | 0.5902  | 0.0393  | 0.8079  | Biso | 1 | H  | 0.162045  |
| H186 | 1 | 0.556   | 0.0175  | 0.8338  | Biso | 1 | H  | 0.182924  |
| H187 | 1 | 0.5703  | 0.9968  | 0.8001  | Biso | 1 | H  | 0.159123  |

|      |   |         |         |         |      |   |   |           |
|------|---|---------|---------|---------|------|---|---|-----------|
| C218 | 1 | 0.2255  | 0.62119 | 0.76447 | Biso | 1 | C | -0.520472 |
| H188 | 1 | 0.2455  | 0.6369  | 0.7875  | Biso | 1 | H | 0.167637  |
| H189 | 1 | 0.1719  | 0.6163  | 0.7576  | Biso | 1 | H | 0.178442  |
| H190 | 1 | 0.2534  | 0.5981  | 0.77    | Biso | 1 | H | 0.172199  |
| C219 | 1 | 0.27245 | 0.53394 | 0.71741 | Biso | 1 | C | -0.5204   |
| H191 | 1 | 0.2761  | 0.5174  | 0.6978  | Biso | 1 | H | 0.167769  |
| H192 | 1 | 0.227   | 0.5281  | 0.7215  | Biso | 1 | H | 0.181338  |
| H193 | 1 | 0.2696  | 0.5592  | 0.7084  | Biso | 1 | H | 0.162128  |
| C220 | 1 | 0.4034  | 0.55287 | 0.31998 | Biso | 1 | C | -0.519142 |
| H194 | 1 | 0.3912  | 0.5326  | 0.3014  | Biso | 1 | H | 0.167537  |
| H195 | 1 | 0.4108  | 0.5434  | 0.3456  | Biso | 1 | H | 0.180162  |
| H196 | 1 | 0.3619  | 0.5706  | 0.3112  | Biso | 1 | H | 0.165697  |
| C221 | 1 | 0.29215 | 0.07629 | 0.73191 | Biso | 1 | C | -0.522368 |
| H197 | 1 | 0.2522  | 0.0632  | 0.7362  | Biso | 1 | H | 0.175279  |
| H198 | 1 | 0.3009  | 0.1001  | 0.745   | Biso | 1 | H | 0.192452  |
| H199 | 1 | 0.2767  | 0.08    | 0.704   | Biso | 1 | H | 0.16315   |
| C222 | 1 | 0.2027  | 0.7019  | 0.64787 | Biso | 1 | C | -0.519215 |
| H200 | 1 | 0.1792  | 0.6894  | 0.6228  | Biso | 1 | H | 0.174723  |
| H201 | 1 | 0.1676  | 0.7201  | 0.65    | Biso | 1 | H | 0.190102  |
| H202 | 1 | 0.249   | 0.7141  | 0.6498  | Biso | 1 | H | 0.168271  |
| C223 | 1 | 0.47808 | 0.4925  | 0.84803 | Biso | 1 | C | -0.523768 |
| H203 | 1 | 0.4674  | 0.5014  | 0.8697  | Biso | 1 | H | 0.174011  |
| H204 | 1 | 0.469   | 0.4661  | 0.8451  | Biso | 1 | H | 0.186982  |
| H205 | 1 | 0.5309  | 0.4975  | 0.8532  | Biso | 1 | H | 0.155021  |
| C224 | 1 | 0.6507  | 0.6241  | 0.35734 | Biso | 1 | C | -0.518895 |
| H206 | 1 | 0.6498  | 0.6431  | 0.3388  | Biso | 1 | H | 0.17268   |
| H207 | 1 | 0.6516  | 0.6356  | 0.381   | Biso | 1 | H | 0.188245  |
| H208 | 1 | 0.6959  | 0.609   | 0.3639  | Biso | 1 | H | 0.171816  |
| C225 | 1 | 0.43876 | 0.08101 | 0.81567 | Biso | 1 | C | 0.102597  |
| C226 | 1 | 0.1249  | 0.68758 | 0.70819 | Biso | 1 | C | 0.099145  |
| C227 | 1 | 0.31513 | 0.46824 | 0.78261 | Biso | 1 | C | 0.101171  |
| C228 | 1 | 0.5226  | 0.60568 | 0.38838 | Biso | 1 | C | 0.099547  |
| C229 | 1 | 0.51011 | 0.09397 | 0.83998 | Biso | 1 | C | -0.164496 |
| H209 | 1 | 0.5527  | 0.0868  | 0.8353  | Biso | 1 | H | 0.098329  |
| C230 | 1 | 0.1254  | 0.69848 | 0.74381 | Biso | 1 | C | -0.17288  |
| H210 | 1 | 0.1658  | 0.6912  | 0.7672  | Biso | 1 | H | 0.110239  |
| C231 | 1 | 0.26805 | 0.45145 | 0.74758 | Biso | 1 | C | -0.183748 |
| H211 | 1 | 0.2625  | 0.462   | 0.7236  | Biso | 1 | H | 0.10693   |
| C232 | 1 | 0.4554  | 0.61833 | 0.3884  | Biso | 1 | C | -0.169357 |
| H212 | 1 | 0.4105  | 0.6169  | 0.3653  | Biso | 1 | H | 0.11315   |
| C233 | 1 | 0.52017 | 0.11703 | 0.87084 | Biso | 1 | C | -0.119824 |
| H213 | 1 | 0.5694  | 0.1251  | 0.8874  | Biso | 1 | H | 0.118028  |
| C234 | 1 | 0.0675  | 0.71985 | 0.74545 | Biso | 1 | C | -0.104612 |
| H214 | 1 | 0.0683  | 0.7269  | 0.7698  | Biso | 1 | H | 0.128176  |
| C235 | 1 | 0.22954 | 0.41957 | 0.74776 | Biso | 1 | C | -0.116079 |
| H215 | 1 | 0.197   | 0.4087  | 0.7239  | Biso | 1 | H | 0.122859  |
| C236 | 1 | 0.4526  | 0.63321 | 0.4221  | Biso | 1 | C | -0.102389 |
| H216 | 1 | 0.4058  | 0.6411  | 0.4218  | Biso | 1 | H | 0.128472  |
| C237 | 1 | 0.45838 | 0.12842 | 0.87753 | Biso | 1 | C | -0.001654 |
| C238 | 1 | 0.008   | 0.73099 | 0.71099 | Biso | 1 | C | -0.003323 |
| C239 | 1 | 0.2385  | 0.40344 | 0.78304 | Biso | 1 | C | -0.000451 |
| C240 | 1 | 0.5181  | 0.63632 | 0.45573 | Biso | 1 | C | -0.003429 |

|      |   |         |         |         |      |   |   |           |
|------|---|---------|---------|---------|------|---|---|-----------|
| C241 | 1 | 0.38622 | 0.1155  | 0.85369 | Biso | 1 | C | -0.092176 |
| H217 | 1 | 0.3436  | 0.1231  | 0.8581  | Biso | 1 | H | 0.132172  |
| C242 | 1 | 0.00575 | 0.71871 | 0.6758  | Biso | 1 | C | -0.101282 |
| H218 | 1 | 0.9647  | 0.7253  | 0.6523  | Biso | 1 | H | 0.128688  |
| C243 | 1 | 0.28291 | 0.42    | 0.81708 | Biso | 1 | C | -0.099503 |
| H219 | 1 | 0.2886  | 0.4091  | 0.8409  | Biso | 1 | H | 0.126303  |
| C244 | 1 | 0.5864  | 0.62268 | 0.45617 | Biso | 1 | C | -0.102015 |
| H220 | 1 | 0.6314  | 0.6242  | 0.4792  | Biso | 1 | H | 0.127121  |
| C245 | 1 | 0.37748 | 0.09167 | 0.82387 | Biso | 1 | C | -0.166389 |
| H221 | 1 | 0.3287  | 0.0822  | 0.8085  | Biso | 1 | H | 0.112167  |
| C246 | 1 | 0.0626  | 0.69698 | 0.67482 | Biso | 1 | C | -0.171286 |
| H222 | 1 | 0.0591  | 0.6881  | 0.6505  | Biso | 1 | H | 0.110568  |
| C247 | 1 | 0.32016 | 0.4527  | 0.81763 | Biso | 1 | C | -0.169189 |
| H223 | 1 | 0.3489  | 0.4645  | 0.8416  | Biso | 1 | H | 0.116109  |
| C248 | 1 | 0.5877  | 0.60724 | 0.42321 | Biso | 1 | C | -0.174614 |
| H224 | 1 | 0.6336  | 0.5974  | 0.4241  | Biso | 1 | H | 0.110588  |
| C249 | 1 | 0.4679  | 0.15536 | 0.90966 | Biso | 1 | C | 0.559933  |
| C250 | 1 | 0.95108 | 0.7579  | 0.7122  | Biso | 1 | C | 0.563585  |
| C251 | 1 | 0.19927 | 0.36808 | 0.78323 | Biso | 1 | C | 0.554452  |
| C252 | 1 | 0.5178  | 0.65748 | 0.48978 | Biso | 1 | C | 0.557461  |
| O33  | 1 | 0.40715 | 0.16934 | 0.90879 | Biso | 1 | O | -0.545478 |
| O34  | 1 | 0.95299 | 0.76633 | 0.74557 | Biso | 1 | O | -0.562746 |
| O35  | 1 | 0.15159 | 0.35645 | 0.7508  | Biso | 1 | O | -0.555781 |
| O36  | 1 | 0.58254 | 0.66614 | 0.51577 | Biso | 1 | O | -0.551003 |
| O37  | 1 | 0.53412 | 0.16259 | 0.9334  | Biso | 1 | O | -0.554293 |
| O38  | 1 | 0.90751 | 0.77137 | 0.68011 | Biso | 1 | O | -0.541998 |
| O39  | 1 | 0.21788 | 0.35267 | 0.81567 | Biso | 1 | O | -0.546255 |
| O40  | 1 | 0.4536  | 0.666   | 0.48908 | Biso | 1 | O | -0.547211 |
| N41  | 1 | 0.29097 | 0.97841 | 0.69694 | Biso | 1 | N | 0.091587  |
| N42  | 1 | 0.40465 | 0.65703 | 0.69125 | Biso | 1 | N | 0.087455  |
| N43  | 1 | 0.49067 | 0.59899 | 0.83542 | Biso | 1 | N | 0.080391  |
| N44  | 1 | 0.56838 | 0.59636 | 0.24318 | Biso | 1 | N | 0.091759  |
| N45  | 1 | 0.33725 | 0.94928 | 0.71213 | Biso | 1 | N | -0.27234  |
| N46  | 1 | 0.44698 | 0.63987 | 0.72494 | Biso | 1 | N | -0.283282 |
| N47  | 1 | 0.44359 | 0.623   | 0.80864 | Biso | 1 | N | -0.259678 |
| N48  | 1 | 0.50602 | 0.5787  | 0.21705 | Biso | 1 | N | -0.287343 |
| C253 | 1 | 0.2933  | 0.92328 | 0.71675 | Biso | 1 | C | 0.23058   |
| C254 | 1 | 0.51416 | 0.65628 | 0.73825 | Biso | 1 | C | 0.232345  |
| C255 | 1 | 0.4362  | 0.65075 | 0.82977 | Biso | 1 | C | 0.232383  |
| C256 | 1 | 0.48136 | 0.59922 | 0.18463 | Biso | 1 | C | 0.226618  |
| C257 | 1 | 0.21873 | 0.93597 | 0.70441 | Biso | 1 | C | -0.180811 |
| C258 | 1 | 0.51476 | 0.68354 | 0.71222 | Biso | 1 | C | -0.172041 |
| C259 | 1 | 0.4772  | 0.64433 | 0.86926 | Biso | 1 | C | -0.1848   |
| C260 | 1 | 0.53004 | 0.62966 | 0.19034 | Biso | 1 | C | -0.179596 |
| C261 | 1 | 0.21969 | 0.97142 | 0.69207 | Biso | 1 | C | 0.146607  |
| C262 | 1 | 0.44441 | 0.68346 | 0.68252 | Biso | 1 | C | 0.160703  |
| C263 | 1 | 0.5123  | 0.61076 | 0.87228 | Biso | 1 | C | 0.151137  |
| C264 | 1 | 0.58375 | 0.6275  | 0.22807 | Biso | 1 | C | 0.172422  |
| C265 | 1 | 0.3257  | 0.88596 | 0.73176 | Biso | 1 | C | -0.528349 |
| H225 | 1 | 0.337   | 0.8843  | 0.7595  | Biso | 1 | H | 0.176275  |
| H226 | 1 | 0.289   | 0.8671  | 0.7176  | Biso | 1 | H | 0.179262  |
| H227 | 1 | 0.3722  | 0.8824  | 0.7279  | Biso | 1 | H | 0.176613  |

|      |   |         |         |         |      |   |   |           |
|------|---|---------|---------|---------|------|---|---|-----------|
| C266 | 1 | 0.5771  | 0.64428 | 0.77566 | Biso | 1 | C | -0.521983 |
| H228 | 1 | 0.5773  | 0.6176  | 0.7774  | Biso | 1 | H | 0.150888  |
| H229 | 1 | 0.6255  | 0.6526  | 0.7763  | Biso | 1 | H | 0.17262   |
| H230 | 1 | 0.5695  | 0.6549  | 0.7976  | Biso | 1 | H | 0.171117  |
| C267 | 1 | 0.3892  | 0.68337 | 0.80968 | Biso | 1 | C | -0.5199   |
| H231 | 1 | 0.3379  | 0.6804  | 0.8083  | Biso | 1 | H | 0.167262  |
| H232 | 1 | 0.4119  | 0.7056  | 0.8243  | Biso | 1 | H | 0.180173  |
| H233 | 1 | 0.3871  | 0.6853  | 0.7834  | Biso | 1 | H | 0.172559  |
| C268 | 1 | 0.41301 | 0.58902 | 0.15004 | Biso | 1 | C | -0.523109 |
| H234 | 1 | 0.3703  | 0.604   | 0.149   | Biso | 1 | H | 0.17553   |
| H235 | 1 | 0.4218  | 0.5932  | 0.1266  | Biso | 1 | H | 0.176831  |
| H236 | 1 | 0.4016  | 0.5631  | 0.1516  | Biso | 1 | H | 0.150685  |
| C269 | 1 | 0.1573  | 0.99922 | 0.67573 | Biso | 1 | C | -0.514277 |
| H237 | 1 | 0.1426  | 0.0017  | 0.6477  | Biso | 1 | H | 0.169538  |
| H238 | 1 | 0.1136  | 0.9912  | 0.6804  | Biso | 1 | H | 0.190905  |
| H239 | 1 | 0.175   | 0.0229  | 0.6884  | Biso | 1 | H | 0.160049  |
| C270 | 1 | 0.40971 | 0.70668 | 0.64619 | Biso | 1 | C | -0.520737 |
| H240 | 1 | 0.3608  | 0.7161  | 0.6438  | Biso | 1 | H | 0.157466  |
| H241 | 1 | 0.4434  | 0.7272  | 0.6479  | Biso | 1 | H | 0.195051  |
| H242 | 1 | 0.4025  | 0.6918  | 0.6234  | Biso | 1 | H | 0.18353   |
| C271 | 1 | 0.5625  | 0.58924 | 0.90665 | Biso | 1 | C | -0.515872 |
| H243 | 1 | 0.6142  | 0.5898  | 0.9084  | Biso | 1 | H | 0.168111  |
| H244 | 1 | 0.5615  | 0.5998  | 0.9303  | Biso | 1 | H | 0.19179   |
| H245 | 1 | 0.5449  | 0.5639  | 0.9039  | Biso | 1 | H | 0.164354  |
| C272 | 1 | 0.64618 | 0.65273 | 0.25101 | Biso | 1 | C | -0.516333 |
| H246 | 1 | 0.6941  | 0.6393  | 0.2611  | Biso | 1 | H | 0.171699  |
| H247 | 1 | 0.6487  | 0.6727  | 0.2343  | Biso | 1 | H | 0.192561  |
| H248 | 1 | 0.6369  | 0.6627  | 0.2727  | Biso | 1 | H | 0.167091  |
| C273 | 1 | 0.15443 | 0.91548 | 0.70566 | Biso | 1 | C | 0.096913  |
| C274 | 1 | 0.58    | 0.70623 | 0.71449 | Biso | 1 | C | 0.096737  |
| C275 | 1 | 0.4852  | 0.66942 | 0.90192 | Biso | 1 | C | 0.098302  |
| C276 | 1 | 0.52468 | 0.65822 | 0.16164 | Biso | 1 | C | 0.097962  |
| C277 | 1 | 0.0866  | 0.9113  | 0.67326 | Biso | 1 | C | -0.174765 |
| H249 | 1 | 0.08    | 0.9229  | 0.6496  | Biso | 1 | H | 0.109752  |
| C278 | 1 | 0.59723 | 0.70944 | 0.68203 | Biso | 1 | C | -0.150992 |
| H250 | 1 | 0.5671  | 0.697   | 0.6587  | Biso | 1 | H | 0.115654  |
| C279 | 1 | 0.4225  | 0.68458 | 0.90445 | Biso | 1 | C | -0.16948  |
| H251 | 1 | 0.3738  | 0.6775  | 0.8863  | Biso | 1 | H | 0.111077  |
| C280 | 1 | 0.45717 | 0.67651 | 0.14062 | Biso | 1 | C | -0.179647 |
| H252 | 1 | 0.4126  | 0.6699  | 0.1437  | Biso | 1 | H | 0.11068   |
| C281 | 1 | 0.0289  | 0.89059 | 0.67496 | Biso | 1 | C | -0.105324 |
| H253 | 1 | 0.9839  | 0.8871  | 0.6522  | Biso | 1 | H | 0.125567  |
| C282 | 1 | 0.65723 | 0.73045 | 0.68339 | Biso | 1 | C | -0.087652 |
| H254 | 1 | 0.6671  | 0.7327  | 0.6608  | Biso | 1 | H | 0.131666  |
| C283 | 1 | 0.4289  | 0.71035 | 0.93329 | Biso | 1 | C | -0.105253 |
| H255 | 1 | 0.385   | 0.7209  | 0.9343  | Biso | 1 | H | 0.1301    |
| C284 | 1 | 0.45501 | 0.7045  | 0.11499 | Biso | 1 | C | -0.116911 |
| H256 | 1 | 0.4088  | 0.7167  | 0.1005  | Biso | 1 | H | 0.117833  |
| C285 | 1 | 0.03583 | 0.87483 | 0.70972 | Biso | 1 | C | 0.000352  |
| C286 | 1 | 0.70265 | 0.74807 | 0.71676 | Biso | 1 | C | -0.012548 |
| C287 | 1 | 0.4993  | 0.72015 | 0.96003 | Biso | 1 | C | 0.000506  |
| C288 | 1 | 0.51983 | 0.71462 | 0.11061 | Biso | 1 | C | -0.017921 |

|      |   |         |         |         |      |   |    |           |
|------|---|---------|---------|---------|------|---|----|-----------|
| C289 | 1 | 0.1015  | 0.87928 | 0.74229 | Biso | 1 | C  | -0.10164  |
| H257 | 1 | 0.1065  | 0.869   | 0.7663  | Biso | 1 | H  | 0.129596  |
| C290 | 1 | 0.6879  | 0.74487 | 0.75002 | Biso | 1 | C  | -0.118868 |
| H258 | 1 | 0.7193  | 0.7569  | 0.7734  | Biso | 1 | H  | 0.120151  |
| C291 | 1 | 0.5637  | 0.70431 | 0.95875 | Biso | 1 | C  | -0.10353  |
| H259 | 1 | 0.6126  | 0.7104  | 0.9776  | Biso | 1 | H  | 0.131265  |
| C292 | 1 | 0.58757 | 0.69605 | 0.13095 | Biso | 1 | C  | -0.084596 |
| H260 | 1 | 0.6319  | 0.7027  | 0.1276  | Biso | 1 | H  | 0.133429  |
| C293 | 1 | 0.161   | 0.89899 | 0.73995 | Biso | 1 | C  | -0.166819 |
| H261 | 1 | 0.207   | 0.9012  | 0.7624  | Biso | 1 | H  | 0.109946  |
| C294 | 1 | 0.62684 | 0.72397 | 0.7485  | Biso | 1 | C  | -0.179997 |
| H262 | 1 | 0.6169  | 0.7218  | 0.7711  | Biso | 1 | H  | 0.109365  |
| C295 | 1 | 0.5547  | 0.67931 | 0.92918 | Biso | 1 | C  | -0.174716 |
| H263 | 1 | 0.5984  | 0.6688  | 0.9279  | Biso | 1 | H  | 0.105749  |
| C296 | 1 | 0.58965 | 0.66789 | 0.15602 | Biso | 1 | C  | -0.154979 |
| H264 | 1 | 0.6355  | 0.655   | 0.1695  | Biso | 1 | H  | 0.11796   |
| C297 | 1 | 0.9731  | 0.8514  | 0.7111  | Biso | 1 | C  | 0.565127  |
| C298 | 1 | 0.76645 | 0.77114 | 0.71732 | Biso | 1 | C  | 0.566575  |
| C299 | 1 | 0.5072  | 0.74854 | 0.98995 | Biso | 1 | C  | 0.562405  |
| C300 | 1 | 0.51893 | 0.74607 | 0.08472 | Biso | 1 | C  | 0.570669  |
| O41  | 1 | 0.91724 | 0.84548 | 0.67948 | Biso | 1 | O  | -0.552251 |
| O42  | 1 | 0.76878 | 0.77709 | 0.68474 | Biso | 1 | O  | -0.543518 |
| O43  | 1 | 0.4464  | 0.75978 | 0.99155 | Biso | 1 | O  | -0.554633 |
| O44  | 1 | 0.58129 | 0.75493 | 0.0842  | Biso | 1 | O  | -0.541763 |
| O45  | 1 | 0.98146 | 0.83921 | 0.74395 | Biso | 1 | O  | -0.555912 |
| O46  | 1 | 0.81405 | 0.78286 | 0.74982 | Biso | 1 | O  | -0.565029 |
| O47  | 1 | 0.57295 | 0.75968 | 0.01058 | Biso | 1 | O  | -0.544052 |
| O48  | 1 | 0.45676 | 0.76145 | 0.06615 | Biso | 1 | O  | -0.561072 |
| Cu19 | 1 | 0.09641 | 0.31072 | 0.74703 | Biso | 1 | Cu | 0.717185  |
| C301 | 1 | 0.67548 | 0.51154 | 0.80985 | Biso | 1 | C  | -0.054444 |
| H265 | 1 | 0.7157  | 0.5293  | 0.8242  | Biso | 1 | H  | 0.121914  |
| H266 | 1 | 0.6476  | 0.5059  | 0.826   | Biso | 1 | H  | 0.108733  |
| C302 | 1 | 0.67134 | 0.1441  | 0.8309  | Biso | 1 | C  | -0.051713 |
| H267 | 1 | 0.6924  | 0.1564  | 0.8565  | Biso | 1 | H  | 0.130455  |
| H268 | 1 | 0.6701  | 0.1175  | 0.8355  | Biso | 1 | H  | 0.115224  |
| C303 | 1 | 0.4879  | 0.06613 | 0.67947 | Biso | 1 | C  | -0.057645 |
| H269 | 1 | 0.4498  | 0.0524  | 0.6577  | Biso | 1 | H  | 0.115453  |
| H270 | 1 | 0.4649  | 0.0731  | 0.6975  | Biso | 1 | H  | 0.104925  |
| C304 | 1 | 0.39284 | 0.08096 | 0.21849 | Biso | 1 | C  | -0.059175 |
| H271 | 1 | 0.3831  | 0.0547  | 0.2209  | Biso | 1 | H  | 0.104716  |
| H272 | 1 | 0.3435  | 0.0933  | 0.2052  | Biso | 1 | H  | 0.126881  |
| Cu20 | 1 | 0.16201 | 0.31124 | 0.82339 | Biso | 1 | Cu | 0.730218  |
| Cu21 | 1 | 0.40693 | 0.29486 | 0.44716 | Biso | 1 | Cu | 0.74669   |
| Cu22 | 1 | 0.55494 | 0.2991  | 0.47309 | Biso | 1 | Cu | 0.704704  |
| Cu23 | 1 | 0.54789 | 0.04333 | 0.26222 | Biso | 1 | Cu | 0.221752  |
| Cu24 | 1 | 0.60501 | 0.10782 | 0.74922 | Biso | 1 | Cu | 0.213141  |
| N49  | 1 | 0.62448 | 0.52745 | 0.77348 | Biso | 1 | N  | 0.070898  |
| N50  | 1 | 0.71992 | 0.15105 | 0.81097 | Biso | 1 | N  | 0.088297  |
| N51  | 1 | 0.55249 | 0.0432  | 0.69941 | Biso | 1 | N  | 0.096255  |
| N52  | 1 | 0.43649 | 0.08482 | 0.19499 | Biso | 1 | N  | 0.077257  |
| N53  | 1 | 0.55492 | 0.51144 | 0.75407 | Biso | 1 | N  | -0.29172  |
| N54  | 1 | 0.71141 | 0.12974 | 0.77979 | Biso | 1 | N  | -0.279496 |

|      |   |         |         |         |      |   |   |           |
|------|---|---------|---------|---------|------|---|---|-----------|
| N55  | 1 | 0.60507 | 0.05469 | 0.73428 | Biso | 1 | N | -0.265242 |
| N56  | 1 | 0.50256 | 0.06591 | 0.20614 | Biso | 1 | N | -0.266485 |
| C305 | 1 | 0.52233 | 0.52951 | 0.72025 | Biso | 1 | C | 0.241856  |
| C306 | 1 | 0.76589 | 0.14029 | 0.76914 | Biso | 1 | C | 0.228675  |
| C307 | 1 | 0.65978 | 0.02948 | 0.74542 | Biso | 1 | C | 0.229687  |
| C308 | 1 | 0.5248  | 0.0714  | 0.17735 | Biso | 1 | C | 0.229159  |
| C309 | 1 | 0.5731  | 0.5565  | 0.71741 | Biso | 1 | C | -0.17779  |
| C310 | 1 | 0.81045 | 0.16813 | 0.79355 | Biso | 1 | C | -0.181785 |
| C311 | 1 | 0.64122 | 0.00152 | 0.71701 | Biso | 1 | C | -0.195429 |
| C312 | 1 | 0.4731  | 0.09308 | 0.148   | Biso | 1 | C | -0.187161 |
| C313 | 1 | 0.63699 | 0.55438 | 0.75216 | Biso | 1 | C | 0.152252  |
| C314 | 1 | 0.77864 | 0.17468 | 0.82007 | Biso | 1 | C | 0.154925  |
| C315 | 1 | 0.57171 | 0.01123 | 0.68807 | Biso | 1 | C | 0.157797  |
| C316 | 1 | 0.4162  | 0.10135 | 0.15998 | Biso | 1 | C | 0.166687  |
| C317 | 1 | 0.44489 | 0.51997 | 0.69222 | Biso | 1 | C | -0.521985 |
| H273 | 1 | 0.4098  | 0.5393  | 0.6921  | Biso | 1 | H | 0.161767  |
| H274 | 1 | 0.444   | 0.5175  | 0.6662  | Biso | 1 | H | 0.183334  |
| H275 | 1 | 0.4297  | 0.4968  | 0.6999  | Biso | 1 | H | 0.159036  |
| C318 | 1 | 0.7745  | 0.12119 | 0.73553 | Biso | 1 | C | -0.520601 |
| H276 | 1 | 0.7545  | 0.1369  | 0.7125  | Biso | 1 | H | 0.167928  |
| H277 | 1 | 0.8281  | 0.1163  | 0.7424  | Biso | 1 | H | 0.178647  |
| H278 | 1 | 0.7466  | 0.0981  | 0.73    | Biso | 1 | H | 0.172001  |
| C319 | 1 | 0.72755 | 0.03394 | 0.78259 | Biso | 1 | C | -0.520743 |
| H279 | 1 | 0.7239  | 0.0174  | 0.8022  | Biso | 1 | H | 0.167554  |
| H280 | 1 | 0.773   | 0.0281  | 0.7785  | Biso | 1 | H | 0.18186   |
| H281 | 1 | 0.7304  | 0.0592  | 0.7916  | Biso | 1 | H | 0.162231  |
| C320 | 1 | 0.5966  | 0.05287 | 0.18002 | Biso | 1 | C | -0.519138 |
| H282 | 1 | 0.6088  | 0.0326  | 0.1986  | Biso | 1 | H | 0.167418  |
| H283 | 1 | 0.5892  | 0.0434  | 0.1544  | Biso | 1 | H | 0.180594  |
| H284 | 1 | 0.6381  | 0.0706  | 0.1888  | Biso | 1 | H | 0.165503  |
| C321 | 1 | 0.70785 | 0.57629 | 0.76809 | Biso | 1 | C | -0.522222 |
| H285 | 1 | 0.7478  | 0.5632  | 0.7638  | Biso | 1 | H | 0.175557  |
| H286 | 1 | 0.6991  | 0.6001  | 0.755   | Biso | 1 | H | 0.192376  |
| H287 | 1 | 0.7233  | 0.58    | 0.796   | Biso | 1 | H | 0.16267   |
| C322 | 1 | 0.7973  | 0.2019  | 0.85213 | Biso | 1 | C | -0.519473 |
| H288 | 1 | 0.8208  | 0.1894  | 0.8772  | Biso | 1 | H | 0.174406  |
| H289 | 1 | 0.8324  | 0.2201  | 0.85    | Biso | 1 | H | 0.190395  |
| H290 | 1 | 0.751   | 0.2141  | 0.8502  | Biso | 1 | H | 0.168259  |
| C323 | 1 | 0.52192 | 0.9925  | 0.65197 | Biso | 1 | C | -0.524192 |
| H291 | 1 | 0.5326  | 0.0014  | 0.6303  | Biso | 1 | H | 0.174834  |
| H292 | 1 | 0.531   | 0.9661  | 0.6549  | Biso | 1 | H | 0.186996  |
| H293 | 1 | 0.4691  | 0.9975  | 0.6468  | Biso | 1 | H | 0.155166  |
| C324 | 1 | 0.3493  | 0.1241  | 0.14266 | Biso | 1 | C | -0.518898 |
| H294 | 1 | 0.3502  | 0.1431  | 0.1612  | Biso | 1 | H | 0.172221  |
| H295 | 1 | 0.3484  | 0.1356  | 0.119   | Biso | 1 | H | 0.188711  |
| H296 | 1 | 0.3041  | 0.109   | 0.1361  | Biso | 1 | H | 0.171636  |
| C325 | 1 | 0.56124 | 0.58101 | 0.68433 | Biso | 1 | C | 0.103163  |
| C326 | 1 | 0.8751  | 0.18758 | 0.79181 | Biso | 1 | C | 0.098978  |
| C327 | 1 | 0.68487 | 0.96824 | 0.71739 | Biso | 1 | C | 0.102099  |
| C328 | 1 | 0.4774  | 0.10568 | 0.11162 | Biso | 1 | C | 0.098566  |
| C329 | 1 | 0.48989 | 0.59397 | 0.66002 | Biso | 1 | C | -0.164511 |
| H297 | 1 | 0.4473  | 0.5868  | 0.6647  | Biso | 1 | H | 0.098376  |

|      |   |         |         |         |      |   |   |           |
|------|---|---------|---------|---------|------|---|---|-----------|
| C330 | 1 | 0.8746  | 0.19848 | 0.75619 | Biso | 1 | C | -0.173298 |
| H298 | 1 | 0.8342  | 0.1912  | 0.7328  | Biso | 1 | H | 0.110435  |
| C331 | 1 | 0.73195 | 0.95145 | 0.75242 | Biso | 1 | C | -0.18307  |
| H299 | 1 | 0.7375  | 0.962   | 0.7764  | Biso | 1 | H | 0.10672   |
| C332 | 1 | 0.5446  | 0.11833 | 0.1116  | Biso | 1 | C | -0.169897 |
| H300 | 1 | 0.5895  | 0.1169  | 0.1347  | Biso | 1 | H | 0.112609  |
| C333 | 1 | 0.47983 | 0.61703 | 0.62916 | Biso | 1 | C | -0.118772 |
| H301 | 1 | 0.4306  | 0.6251  | 0.6126  | Biso | 1 | H | 0.11821   |
| C334 | 1 | 0.9325  | 0.21985 | 0.75455 | Biso | 1 | C | -0.104351 |
| H302 | 1 | 0.9317  | 0.2269  | 0.7302  | Biso | 1 | H | 0.128602  |
| C335 | 1 | 0.77046 | 0.91957 | 0.75224 | Biso | 1 | C | -0.114011 |
| H303 | 1 | 0.803   | 0.9087  | 0.7761  | Biso | 1 | H | 0.122904  |
| C336 | 1 | 0.5474  | 0.13321 | 0.0779  | Biso | 1 | C | -0.102602 |
| H304 | 1 | 0.5942  | 0.1411  | 0.0782  | Biso | 1 | H | 0.128377  |
| C337 | 1 | 0.54162 | 0.62842 | 0.62247 | Biso | 1 | C | -0.002343 |
| C338 | 1 | 0.992   | 0.23099 | 0.78901 | Biso | 1 | C | -0.003081 |
| C339 | 1 | 0.7615  | 0.90344 | 0.71696 | Biso | 1 | C | -0.004711 |
| C340 | 1 | 0.4819  | 0.13632 | 0.04427 | Biso | 1 | C | -0.00277  |
| C341 | 1 | 0.61378 | 0.6155  | 0.64631 | Biso | 1 | C | -0.092351 |
| H305 | 1 | 0.6564  | 0.6231  | 0.6419  | Biso | 1 | H | 0.132432  |
| C342 | 1 | 0.99425 | 0.21871 | 0.8242  | Biso | 1 | C | -0.101088 |
| H306 | 1 | 0.0353  | 0.2253  | 0.8477  | Biso | 1 | H | 0.128447  |
| C343 | 1 | 0.71709 | 0.92    | 0.68292 | Biso | 1 | C | -0.098029 |
| H307 | 1 | 0.7114  | 0.9091  | 0.6591  | Biso | 1 | H | 0.127121  |
| C344 | 1 | 0.4136  | 0.12268 | 0.04383 | Biso | 1 | C | -0.101657 |
| H308 | 1 | 0.3686  | 0.1242  | 0.0208  | Biso | 1 | H | 0.127267  |
| C345 | 1 | 0.62252 | 0.59167 | 0.67613 | Biso | 1 | C | -0.165929 |
| H309 | 1 | 0.6713  | 0.5822  | 0.6915  | Biso | 1 | H | 0.112201  |
| C346 | 1 | 0.9374  | 0.19698 | 0.82518 | Biso | 1 | C | -0.171112 |
| H310 | 1 | 0.9409  | 0.1881  | 0.8495  | Biso | 1 | H | 0.109893  |
| C347 | 1 | 0.67984 | 0.9527  | 0.68237 | Biso | 1 | C | -0.16838  |
| H311 | 1 | 0.6511  | 0.9645  | 0.6584  | Biso | 1 | H | 0.116777  |
| C348 | 1 | 0.4123  | 0.10724 | 0.07679 | Biso | 1 | C | -0.174901 |
| H312 | 1 | 0.3664  | 0.0974  | 0.0759  | Biso | 1 | H | 0.110385  |
| C349 | 1 | 0.5321  | 0.65536 | 0.59034 | Biso | 1 | C | 0.560006  |
| C350 | 1 | 0.04892 | 0.2579  | 0.7878  | Biso | 1 | C | 0.563615  |
| C351 | 1 | 0.80073 | 0.86808 | 0.71677 | Biso | 1 | C | 0.556096  |
| C352 | 1 | 0.4822  | 0.15748 | 0.01022 | Biso | 1 | C | 0.556589  |
| O49  | 1 | 0.59285 | 0.66934 | 0.59121 | Biso | 1 | O | -0.545013 |
| O50  | 1 | 0.04701 | 0.26633 | 0.75443 | Biso | 1 | O | -0.56249  |
| O51  | 1 | 0.84841 | 0.85645 | 0.7492  | Biso | 1 | O | -0.555518 |
| O52  | 1 | 0.41746 | 0.16614 | 0.98423 | Biso | 1 | O | -0.551495 |
| O53  | 1 | 0.46588 | 0.66259 | 0.5666  | Biso | 1 | O | -0.553263 |
| O54  | 1 | 0.09249 | 0.27137 | 0.81989 | Biso | 1 | O | -0.542682 |
| O55  | 1 | 0.78212 | 0.85267 | 0.68433 | Biso | 1 | O | -0.545228 |
| O56  | 1 | 0.5464  | 0.166   | 0.01092 | Biso | 1 | O | -0.548373 |
| N57  | 1 | 0.70903 | 0.47841 | 0.80306 | Biso | 1 | N | 0.088363  |
| N58  | 1 | 0.59535 | 0.15703 | 0.80875 | Biso | 1 | N | 0.087594  |
| N59  | 1 | 0.50933 | 0.09899 | 0.66458 | Biso | 1 | N | 0.080729  |
| N60  | 1 | 0.43162 | 0.09636 | 0.25682 | Biso | 1 | N | 0.091877  |
| N61  | 1 | 0.66275 | 0.44928 | 0.78787 | Biso | 1 | N | -0.270965 |
| N62  | 1 | 0.55302 | 0.13987 | 0.77506 | Biso | 1 | N | -0.283541 |

|      |   |         |         |         |      |   |   |           |
|------|---|---------|---------|---------|------|---|---|-----------|
| N63  | 1 | 0.55641 | 0.123   | 0.69136 | Biso | 1 | N | -0.260678 |
| N64  | 1 | 0.49398 | 0.0787  | 0.28295 | Biso | 1 | N | -0.287075 |
| C353 | 1 | 0.7067  | 0.42328 | 0.78325 | Biso | 1 | C | 0.230656  |
| C354 | 1 | 0.48584 | 0.15628 | 0.76175 | Biso | 1 | C | 0.232755  |
| C355 | 1 | 0.5638  | 0.15075 | 0.67023 | Biso | 1 | C | 0.232641  |
| C356 | 1 | 0.51864 | 0.09922 | 0.31537 | Biso | 1 | C | 0.226413  |
| C357 | 1 | 0.78127 | 0.43597 | 0.79559 | Biso | 1 | C | -0.180786 |
| C358 | 1 | 0.48524 | 0.18354 | 0.78778 | Biso | 1 | C | -0.171599 |
| C359 | 1 | 0.5228  | 0.14433 | 0.63074 | Biso | 1 | C | -0.184697 |
| C360 | 1 | 0.46996 | 0.12966 | 0.30966 | Biso | 1 | C | -0.180359 |
| C361 | 1 | 0.78031 | 0.47142 | 0.80793 | Biso | 1 | C | 0.148128  |
| C362 | 1 | 0.55559 | 0.18346 | 0.81748 | Biso | 1 | C | 0.160764  |
| C363 | 1 | 0.4877  | 0.11076 | 0.62772 | Biso | 1 | C | 0.151562  |
| C364 | 1 | 0.41625 | 0.1275  | 0.27193 | Biso | 1 | C | 0.171904  |
| C365 | 1 | 0.6743  | 0.38596 | 0.76824 | Biso | 1 | C | -0.528298 |
| H313 | 1 | 0.663   | 0.3843  | 0.7405  | Biso | 1 | H | 0.176696  |
| H314 | 1 | 0.711   | 0.3671  | 0.7824  | Biso | 1 | H | 0.178988  |
| H315 | 1 | 0.6278  | 0.3824  | 0.7721  | Biso | 1 | H | 0.17627   |
| C366 | 1 | 0.4229  | 0.14428 | 0.72434 | Biso | 1 | C | -0.52213  |
| H316 | 1 | 0.4227  | 0.1176  | 0.7226  | Biso | 1 | H | 0.150744  |
| H317 | 1 | 0.3745  | 0.1526  | 0.7237  | Biso | 1 | H | 0.172527  |
| H318 | 1 | 0.4305  | 0.1549  | 0.7024  | Biso | 1 | H | 0.171625  |
| C367 | 1 | 0.6108  | 0.18337 | 0.69032 | Biso | 1 | C | -0.520334 |
| H319 | 1 | 0.6621  | 0.1804  | 0.6917  | Biso | 1 | H | 0.167455  |
| H320 | 1 | 0.5881  | 0.2056  | 0.6757  | Biso | 1 | H | 0.180373  |
| H321 | 1 | 0.6129  | 0.1853  | 0.7166  | Biso | 1 | H | 0.172688  |
| C368 | 1 | 0.58699 | 0.08902 | 0.34996 | Biso | 1 | C | -0.52319  |
| H322 | 1 | 0.6297  | 0.104   | 0.351   | Biso | 1 | H | 0.175629  |
| H323 | 1 | 0.5782  | 0.0932  | 0.3734  | Biso | 1 | H | 0.176451  |
| H324 | 1 | 0.5984  | 0.0631  | 0.3484  | Biso | 1 | H | 0.150818  |
| C369 | 1 | 0.8427  | 0.49922 | 0.82427 | Biso | 1 | C | -0.514511 |
| H325 | 1 | 0.8574  | 0.5017  | 0.8523  | Biso | 1 | H | 0.168965  |
| H326 | 1 | 0.8864  | 0.4912  | 0.8196  | Biso | 1 | H | 0.191366  |
| H327 | 1 | 0.825   | 0.5229  | 0.8116  | Biso | 1 | H | 0.160294  |
| C370 | 1 | 0.59029 | 0.20668 | 0.85381 | Biso | 1 | C | -0.521013 |
| H328 | 1 | 0.6392  | 0.2161  | 0.8562  | Biso | 1 | H | 0.157754  |
| H329 | 1 | 0.5566  | 0.2272  | 0.8521  | Biso | 1 | H | 0.195381  |
| H330 | 1 | 0.5975  | 0.1918  | 0.8766  | Biso | 1 | H | 0.183054  |
| C371 | 1 | 0.4375  | 0.08924 | 0.59335 | Biso | 1 | C | -0.516318 |
| H331 | 1 | 0.3858  | 0.0898  | 0.5916  | Biso | 1 | H | 0.168108  |
| H332 | 1 | 0.4385  | 0.0998  | 0.5697  | Biso | 1 | H | 0.192257  |
| H333 | 1 | 0.4551  | 0.0639  | 0.5961  | Biso | 1 | H | 0.164427  |
| C372 | 1 | 0.35382 | 0.15273 | 0.24899 | Biso | 1 | C | -0.516179 |
| H334 | 1 | 0.3059  | 0.1393  | 0.2389  | Biso | 1 | H | 0.171431  |
| H335 | 1 | 0.3513  | 0.1727  | 0.2657  | Biso | 1 | H | 0.192089  |
| H336 | 1 | 0.3631  | 0.1627  | 0.2273  | Biso | 1 | H | 0.167675  |
| C373 | 1 | 0.84557 | 0.41548 | 0.79434 | Biso | 1 | C | 0.096196  |
| C374 | 1 | 0.42    | 0.20623 | 0.78551 | Biso | 1 | C | 0.096188  |
| C375 | 1 | 0.5148  | 0.16942 | 0.59808 | Biso | 1 | C | 0.09889   |
| C376 | 1 | 0.47532 | 0.15822 | 0.33836 | Biso | 1 | C | 0.098581  |
| C377 | 1 | 0.9134  | 0.4113  | 0.82674 | Biso | 1 | C | -0.174997 |
| H337 | 1 | 0.92    | 0.4229  | 0.8504  | Biso | 1 | H | 0.109229  |

|      |   |         |         |         |      |   |   |           |
|------|---|---------|---------|---------|------|---|---|-----------|
| C378 | 1 | 0.40277 | 0.20944 | 0.81797 | Biso | 1 | C | -0.150641 |
| H338 | 1 | 0.4329  | 0.197   | 0.8413  | Biso | 1 | H | 0.115153  |
| C379 | 1 | 0.5775  | 0.18458 | 0.59555 | Biso | 1 | C | -0.168828 |
| H339 | 1 | 0.6262  | 0.1775  | 0.6137  | Biso | 1 | H | 0.111083  |
| C380 | 1 | 0.54283 | 0.17651 | 0.35938 | Biso | 1 | C | -0.179105 |
| H340 | 1 | 0.5874  | 0.1699  | 0.3563  | Biso | 1 | H | 0.11102   |
| C381 | 1 | 0.9711  | 0.39059 | 0.82504 | Biso | 1 | C | -0.105208 |
| H341 | 1 | 0.0161  | 0.3871  | 0.8478  | Biso | 1 | H | 0.125427  |
| C382 | 1 | 0.34277 | 0.23045 | 0.81661 | Biso | 1 | C | -0.087361 |
| H342 | 1 | 0.3329  | 0.2327  | 0.8392  | Biso | 1 | H | 0.131314  |
| C383 | 1 | 0.5711  | 0.21035 | 0.56671 | Biso | 1 | C | -0.105256 |
| H343 | 1 | 0.615   | 0.2209  | 0.5657  | Biso | 1 | H | 0.130484  |
| C384 | 1 | 0.54499 | 0.2045  | 0.38501 | Biso | 1 | C | -0.116296 |
| H344 | 1 | 0.5912  | 0.2167  | 0.3995  | Biso | 1 | H | 0.118034  |
| C385 | 1 | 0.96417 | 0.37483 | 0.79028 | Biso | 1 | C | 0.000659  |
| C386 | 1 | 0.29735 | 0.24807 | 0.78324 | Biso | 1 | C | -0.012681 |
| C387 | 1 | 0.5007  | 0.22015 | 0.53997 | Biso | 1 | C | 0.000489  |
| C388 | 1 | 0.48017 | 0.21462 | 0.38939 | Biso | 1 | C | -0.018158 |
| C389 | 1 | 0.8985  | 0.37928 | 0.75771 | Biso | 1 | C | -0.101955 |
| H345 | 1 | 0.8935  | 0.369   | 0.7337  | Biso | 1 | H | 0.130121  |
| C390 | 1 | 0.3121  | 0.24487 | 0.74998 | Biso | 1 | C | -0.118603 |
| H346 | 1 | 0.2807  | 0.2569  | 0.7266  | Biso | 1 | H | 0.120361  |
| C391 | 1 | 0.4363  | 0.20431 | 0.54125 | Biso | 1 | C | -0.103611 |
| H347 | 1 | 0.3874  | 0.2104  | 0.5224  | Biso | 1 | H | 0.131365  |
| C392 | 1 | 0.41243 | 0.19605 | 0.36905 | Biso | 1 | C | -0.08503  |
| H348 | 1 | 0.3681  | 0.2027  | 0.3724  | Biso | 1 | H | 0.132983  |
| C393 | 1 | 0.839   | 0.39899 | 0.76005 | Biso | 1 | C | -0.166864 |
| H349 | 1 | 0.793   | 0.4012  | 0.7376  | Biso | 1 | H | 0.110102  |
| C394 | 1 | 0.37316 | 0.22397 | 0.7515  | Biso | 1 | C | -0.180307 |
| H350 | 1 | 0.3831  | 0.2218  | 0.7289  | Biso | 1 | H | 0.109599  |
| C395 | 1 | 0.4453  | 0.17931 | 0.57082 | Biso | 1 | C | -0.174746 |
| H351 | 1 | 0.4016  | 0.1688  | 0.5721  | Biso | 1 | H | 0.105759  |
| C396 | 1 | 0.41035 | 0.16789 | 0.34398 | Biso | 1 | C | -0.15543  |
| H352 | 1 | 0.3645  | 0.155   | 0.3305  | Biso | 1 | H | 0.11774   |
| C397 | 1 | 0.0269  | 0.3514  | 0.7889  | Biso | 1 | C | 0.564342  |
| C398 | 1 | 0.23355 | 0.27114 | 0.78268 | Biso | 1 | C | 0.566396  |
| C399 | 1 | 0.4928  | 0.24854 | 0.51005 | Biso | 1 | C | 0.562598  |
| C400 | 1 | 0.48107 | 0.24607 | 0.41528 | Biso | 1 | C | 0.571209  |
| O57  | 1 | 0.08276 | 0.34548 | 0.82052 | Biso | 1 | O | -0.552721 |
| O58  | 1 | 0.23122 | 0.27709 | 0.81526 | Biso | 1 | O | -0.544623 |
| O59  | 1 | 0.5536  | 0.25978 | 0.50845 | Biso | 1 | O | -0.554006 |
| O60  | 1 | 0.41871 | 0.25493 | 0.4158  | Biso | 1 | O | -0.541776 |
| O61  | 1 | 0.01854 | 0.33921 | 0.75605 | Biso | 1 | O | -0.55581  |
| O62  | 1 | 0.18595 | 0.28286 | 0.75018 | Biso | 1 | O | -0.564789 |
| O63  | 1 | 0.42705 | 0.25968 | 0.48942 | Biso | 1 | O | -0.543653 |
| O64  | 1 | 0.54324 | 0.26145 | 0.43385 | Biso | 1 | O | -0.560657 |

data\_BEWCUD\_CLEAN

\_cell\_length\_a 30.701

\_cell\_length\_b 30.701

\_cell\_length\_c 28.957

\_cell\_angle\_alpha 90

\_cell\_angle\_beta 90

\_cell\_angle\_gamma 90

\_symmetry\_space\_group\_name\_H-M "P 1"

\_symmetry\_int\_tables\_number 1

loop\_

\_symmetry\_equiv\_pos\_as\_xyz

'x, y, z'

loop\_

\_atom\_site\_label

\_atom\_site\_occupancy

\_atom\_site\_fract\_x

\_atom\_site\_fract\_y

\_atom\_site\_fract\_z

\_atom\_site\_thermal\_displace\_type

\_atom\_site\_B\_iso\_or\_equiv

\_atom\_site\_type\_symbol

\_atom\_site\_charge

|     |   |         |         |         |      |   |   |           |
|-----|---|---------|---------|---------|------|---|---|-----------|
| O1  | 1 | 0.30158 | 0.13417 | 0.04806 | Biso | 1 | O | -0.596831 |
| O2  | 1 | 0.35413 | 0.08234 | 0.04844 | Biso | 1 | O | -0.551321 |
| C1  | 1 | 0.3205  | 0.0986  | 0.0623  | Biso | 1 | C | 0.609936  |
| C2  | 1 | 0.2945  | 0.0785  | 0.1006  | Biso | 1 | C | -0.035503 |
| C3  | 1 | 0.2566  | 0.0954  | 0.118   | Biso | 1 | C | -0.088236 |
| H1  | 1 | 0.2456  | 0.1208  | 0.105   | Biso | 1 | H | 0.12209   |
| C4  | 1 | 0.2342  | 0.0765  | 0.1535  | Biso | 1 | C | -0.158787 |
| H2  | 1 | 0.2079  | 0.0879  | 0.1638  | Biso | 1 | H | 0.126439  |
| C5  | 1 | 0.2526  | 0.0383  | 0.1746  | Biso | 1 | C | 0.072923  |
| C6  | 1 | 0.2907  | 0.0208  | 0.1571  | Biso | 1 | C | -0.160249 |
| H3  | 1 | 0.302   | 0.9954  | 0.17    | Biso | 1 | H | 0.12181   |
| C7  | 1 | 0.3123  | 0.0406  | 0.1205  | Biso | 1 | C | -0.110326 |
| H4  | 1 | 0.3382  | 0.029   | 0.1093  | Biso | 1 | H | 0.123192  |
| C8  | 1 | 0.2273  | 0.0165  | 0.2138  | Biso | 1 | C | 0.09473   |
| C9  | 1 | 0.1839  | 0.0165  | 0.2143  | Biso | 1 | C | -0.21553  |
| H5  | 1 | 0.1692  | 0.0282  | 0.1892  | Biso | 1 | H | 0.122794  |
| C10 | 1 | 0.09058 | 0.96111 | 0.25069 | Biso | 1 | C | 0.182399  |
| C11 | 1 | 0.11263 | 0.91887 | 0.2502  | Biso | 1 | C | -0.205554 |
| H6  | 1 | 0.1426  | 0.9143  | 0.2502  | Biso | 1 | H | 0.1369    |
| O3  | 1 | 0.80158 | 0.63417 | 0.54806 | Biso | 1 | O | -0.596783 |
| O4  | 1 | 0.85413 | 0.58234 | 0.54844 | Biso | 1 | O | -0.551245 |
| C12 | 1 | 0.8205  | 0.5986  | 0.5623  | Biso | 1 | C | 0.60983   |
| C13 | 1 | 0.7945  | 0.5785  | 0.6006  | Biso | 1 | C | -0.035413 |
| C14 | 1 | 0.7566  | 0.5954  | 0.618   | Biso | 1 | C | -0.088226 |
| H7  | 1 | 0.7456  | 0.6208  | 0.605   | Biso | 1 | H | 0.122038  |
| C15 | 1 | 0.7342  | 0.5765  | 0.6535  | Biso | 1 | C | -0.158789 |

|     |   |         |         |         |      |   |   |           |  |
|-----|---|---------|---------|---------|------|---|---|-----------|--|
| H8  | 1 | 0.7079  | 0.5879  | 0.6638  | Biso | 1 | H | 0.126436  |  |
| C16 | 1 | 0.7526  | 0.5383  | 0.6746  | Biso | 1 | C | 0.072881  |  |
| C17 | 1 | 0.7907  | 0.5208  | 0.6571  | Biso | 1 | C | -0.160419 |  |
| H9  | 1 | 0.802   | 0.4954  | 0.67    | Biso | 1 | H | 0.121918  |  |
| C18 | 1 | 0.8123  | 0.5406  | 0.6205  | Biso | 1 | C | -0.110306 |  |
| H10 | 1 | 0.8382  | 0.529   | 0.6093  | Biso | 1 | H | 0.123196  |  |
| C19 | 1 | 0.7273  | 0.5165  | 0.7138  | Biso | 1 | C | 0.094728  |  |
| C20 | 1 | 0.6839  | 0.5165  | 0.7143  | Biso | 1 | C | -0.215481 |  |
| H11 | 1 | 0.6692  | 0.5282  | 0.6892  | Biso | 1 | H | 0.122883  |  |
| C21 | 1 | 0.59058 | 0.46111 | 0.75069 | Biso | 1 | C | 0.18277   |  |
| C22 | 1 | 0.61263 | 0.41887 | 0.7502  | Biso | 1 | C | -0.205642 |  |
| H12 | 1 | 0.6426  | 0.4143  | 0.7502  | Biso | 1 | H | 0.136754  |  |
| O5  | 1 | 0.69842 | 0.86583 | 0.04806 | Biso | 1 | O | -0.596681 |  |
| O6  | 1 | 0.64587 | 0.91766 | 0.04844 | Biso | 1 | O | -0.551158 |  |
| C23 | 1 | 0.6795  | 0.9014  | 0.0623  | Biso | 1 | C | 0.609595  |  |
| C24 | 1 | 0.7055  | 0.9215  | 0.1006  | Biso | 1 | C | -0.035306 |  |
| C25 | 1 | 0.7434  | 0.9046  | 0.118   | Biso | 1 | C | -0.08838  |  |
| H13 | 1 | 0.7544  | 0.8792  | 0.105   | Biso | 1 | H | 0.122255  |  |
| C26 | 1 | 0.7658  | 0.9235  | 0.1535  | Biso | 1 | C | -0.158871 |  |
| H14 | 1 | 0.7921  | 0.9121  | 0.1638  | Biso | 1 | H | 0.126433  |  |
| C27 | 1 | 0.7474  | 0.9617  | 0.1746  | Biso | 1 | C | 0.072942  |  |
| C28 | 1 | 0.7093  | 0.9792  | 0.1571  | Biso | 1 | C | -0.160267 |  |
| H15 | 1 | 0.698   | 0.0046  | 0.17    | Biso | 1 | H | 0.121722  |  |
| C29 | 1 | 0.6877  | 0.9594  | 0.1205  | Biso | 1 | C | -0.110525 |  |
| H16 | 1 | 0.6618  | 0.971   | 0.1093  | Biso | 1 | H | 0.123377  |  |
| C30 | 1 | 0.7727  | 0.9835  | 0.2138  | Biso | 1 | C | 0.094532  |  |
| C31 | 1 | 0.8161  | 0.9835  | 0.2143  | Biso | 1 | C | -0.215417 |  |
| H17 | 1 | 0.8308  | 0.9718  | 0.1892  | Biso | 1 | H | 0.122647  |  |
| C32 | 1 | 0.90942 | 0.03889 | 0.25069 | Biso | 1 | C | 0.182521  |  |
| C33 | 1 | 0.88737 | 0.08113 | 0.2502  | Biso | 1 | C | -0.205346 |  |
| H18 | 1 | 0.8574  | 0.0857  | 0.2502  | Biso | 1 | H | 0.137051  |  |
| O7  | 1 | 0.19842 | 0.36583 | 0.54806 | Biso | 1 | O | -0.596667 |  |
| O8  | 1 | 0.14587 | 0.41766 | 0.54844 | Biso | 1 | O | -0.551219 |  |
| C34 | 1 | 0.1795  | 0.4014  | 0.5623  | Biso | 1 | C | 0.609654  |  |
| C35 | 1 | 0.2055  | 0.4215  | 0.6006  | Biso | 1 | C | -0.035267 |  |
| C36 | 1 | 0.2434  | 0.4046  | 0.618   | Biso | 1 | C | -0.088411 |  |
| H19 | 1 | 0.2544  | 0.3792  | 0.605   | Biso | 1 | H | 0.122228  |  |
| C37 | 1 | 0.2658  | 0.4235  | 0.6535  | Biso | 1 | C | -0.158842 |  |
| H20 | 1 | 0.2921  | 0.4121  | 0.6638  | Biso | 1 | H | 0.12644   |  |
| C38 | 1 | 0.2474  | 0.4617  | 0.6746  | Biso | 1 | C | 0.07285   |  |
| C39 | 1 | 0.2093  | 0.4792  | 0.6571  | Biso | 1 | C | -0.160222 |  |
| H21 | 1 | 0.198   | 0.5046  | 0.67    | Biso | 1 | H | 0.121711  |  |
| C40 | 1 | 0.1877  | 0.4594  | 0.6205  | Biso | 1 | C | -0.110512 |  |
| H22 | 1 | 0.1618  | 0.471   | 0.6093  | Biso | 1 | H | 0.123382  |  |
| C41 | 1 | 0.2727  | 0.4835  | 0.7138  | Biso | 1 | C | 0.094714  |  |
| C42 | 1 | 0.3161  | 0.4835  | 0.7143  | Biso | 1 | C | -0.215366 |  |
| H23 | 1 | 0.3308  | 0.4718  | 0.6892  | Biso | 1 | H | 0.122768  |  |
| C43 | 1 | 0.40942 | 0.53889 | 0.75069 | Biso | 1 | C | 0.182399  |  |
| C44 | 1 | 0.38737 | 0.58113 | 0.7502  | Biso | 1 | C | -0.205346 |  |
| H24 | 1 | 0.3574  | 0.5857  | 0.7502  | Biso | 1 | H | 0.136934  |  |
| O9  | 1 | 0.86583 | 0.30158 | 0.04806 | Biso | 1 | O | -0.596419 |  |
| O10 | 1 | 0.91766 | 0.35413 | 0.04844 | Biso | 1 | O | -0.551364 |  |

|     |   |         |        |         |      |         |      |           |   |           |
|-----|---|---------|--------|---------|------|---------|------|-----------|---|-----------|
| C45 | 1 | 0.9014  | 0.3205 | 0.0623  | Biso | 1       | C    | 0.609562  |   |           |
| C46 | 1 | 0.9215  | 0.2945 | 0.1006  | Biso | 1       | C    | -0.03537  |   |           |
| C47 | 1 | 0.9046  | 0.2566 | 0.118   | Biso | 1       | C    | -0.088346 |   |           |
| H25 | 1 | 0.8792  | 0.2456 | 0.105   | Biso | 1       | H    | 0.122357  |   |           |
| C48 | 1 | 0.9235  | 0.2342 | 0.1535  | Biso | 1       | C    | -0.158844 |   |           |
| H26 | 1 | 0.9121  | 0.2079 | 0.1638  | Biso | 1       | H    | 0.126666  |   |           |
| C49 | 1 | 0.9617  | 0.2526 | 0.1746  | Biso | 1       | C    | 0.072919  |   |           |
| C50 | 1 | 0.9792  | 0.2907 | 0.1571  | Biso | 1       | C    | -0.160437 |   |           |
| H27 | 1 | 0.0046  | 0.302  | 0.17    | Biso | 1       | H    | 0.121748  |   |           |
| C51 | 1 | 0.9594  | 0.3123 | 0.1205  | Biso | 1       | C    | -0.110408 |   |           |
| H28 | 1 | 0.971   | 0.3382 | 0.1093  | Biso | 1       | H    | 0.123124  |   |           |
| C52 | 1 | 0.9835  | 0.2273 | 0.2138  | Biso | 1       | C    | 0.094579  |   |           |
| C53 | 1 | 0.9835  | 0.1839 | 0.2143  | Biso | 1       | C    | -0.215509 |   |           |
| H29 | 1 | 0.9718  | 0.1692 | 0.1892  | Biso | 1       | H    | 0.122812  |   |           |
| C54 | 1 | 0.03889 |        | 0.09058 |      | 0.25069 | Biso | 1         | C | 0.182425  |
| C55 | 1 | 0.08113 |        | 0.11263 |      | 0.2502  | Biso | 1         | C | -0.205478 |
| H30 | 1 | 0.0857  | 0.1426 | 0.2502  | Biso | 1       | H    | 0.136876  |   |           |
| O11 | 1 | 0.36583 |        | 0.80158 |      | 0.54806 | Biso | 1         | O | -0.596319 |
| O12 | 1 | 0.41766 |        | 0.85413 |      | 0.54844 | Biso | 1         | O | -0.551441 |
| C56 | 1 | 0.4014  | 0.8205 | 0.5623  | Biso | 1       | C    | 0.609572  |   |           |
| C57 | 1 | 0.4215  | 0.7945 | 0.6006  | Biso | 1       | C    | -0.035401 |   |           |
| C58 | 1 | 0.4046  | 0.7566 | 0.618   | Biso | 1       | C    | -0.088301 |   |           |
| H31 | 1 | 0.3792  | 0.7456 | 0.605   | Biso | 1       | H    | 0.122347  |   |           |
| C59 | 1 | 0.4235  | 0.7342 | 0.6535  | Biso | 1       | C    | -0.158824 |   |           |
| H32 | 1 | 0.4121  | 0.7079 | 0.6638  | Biso | 1       | H    | 0.126612  |   |           |
| C60 | 1 | 0.4617  | 0.7526 | 0.6746  | Biso | 1       | C    | 0.072907  |   |           |
| C61 | 1 | 0.4792  | 0.7907 | 0.6571  | Biso | 1       | C    | -0.160402 |   |           |
| H33 | 1 | 0.5046  | 0.802  | 0.67    | Biso | 1       | H    | 0.121703  |   |           |
| C62 | 1 | 0.4594  | 0.8123 | 0.6205  | Biso | 1       | C    | -0.110477 |   |           |
| H34 | 1 | 0.471   | 0.8382 | 0.6093  | Biso | 1       | H    | 0.123149  |   |           |
| C63 | 1 | 0.4835  | 0.7273 | 0.7138  | Biso | 1       | C    | 0.094814  |   |           |
| C64 | 1 | 0.4835  | 0.6839 | 0.7143  | Biso | 1       | C    | -0.215581 |   |           |
| H35 | 1 | 0.4718  | 0.6692 | 0.6892  | Biso | 1       | H    | 0.122992  |   |           |
| C65 | 1 | 0.53889 |        | 0.59058 |      | 0.75069 | Biso | 1         | C | 0.182498  |
| C66 | 1 | 0.58113 |        | 0.61263 |      | 0.7502  | Biso | 1         | C | -0.205535 |
| H36 | 1 | 0.5857  | 0.6426 | 0.7502  | Biso | 1       | H    | 0.136713  |   |           |
| O13 | 1 | 0.13417 |        | 0.69842 |      | 0.04806 | Biso | 1         | O | -0.597047 |
| O14 | 1 | 0.08234 |        | 0.64587 |      | 0.04844 | Biso | 1         | O | -0.551127 |
| C67 | 1 | 0.0986  | 0.6795 | 0.0623  | Biso | 1       | C    | 0.609884  |   |           |
| C68 | 1 | 0.0785  | 0.7055 | 0.1006  | Biso | 1       | C    | -0.035223 |   |           |
| C69 | 1 | 0.0954  | 0.7434 | 0.118   | Biso | 1       | C    | -0.088401 |   |           |
| H37 | 1 | 0.1208  | 0.7544 | 0.105   | Biso | 1       | H    | 0.121982  |   |           |
| C70 | 1 | 0.0765  | 0.7658 | 0.1535  | Biso | 1       | C    | -0.158923 |   |           |
| H38 | 1 | 0.0879  | 0.7921 | 0.1638  | Biso | 1       | H    | 0.126315  |   |           |
| C71 | 1 | 0.0383  | 0.7474 | 0.1746  | Biso | 1       | C    | 0.073123  |   |           |
| C72 | 1 | 0.0208  | 0.7093 | 0.1571  | Biso | 1       | C    | -0.160473 |   |           |
| H39 | 1 | 0.9954  | 0.698  | 0.17    | Biso | 1       | H    | 0.121991  |   |           |
| C73 | 1 | 0.0406  | 0.6877 | 0.1205  | Biso | 1       | C    | -0.110353 |   |           |
| H40 | 1 | 0.029   | 0.6618 | 0.1093  | Biso | 1       | H    | 0.123403  |   |           |
| C74 | 1 | 0.0165  | 0.7727 | 0.2138  | Biso | 1       | C    | 0.094526  |   |           |
| C75 | 1 | 0.0165  | 0.8161 | 0.2143  | Biso | 1       | C    | -0.215345 |   |           |
| H41 | 1 | 0.0282  | 0.8308 | 0.1892  | Biso | 1       | H    | 0.122608  |   |           |

|      |   |         |         |         |      |   |   |           |
|------|---|---------|---------|---------|------|---|---|-----------|
| C76  | 1 | 0.96111 | 0.90942 | 0.25069 | Biso | 1 | C | 0.182401  |
| C77  | 1 | 0.91887 | 0.88737 | 0.2502  | Biso | 1 | C | -0.205306 |
| H42  | 1 | 0.9143  | 0.8574  | 0.2502  | Biso | 1 | H | 0.137092  |
| O15  | 1 | 0.63417 | 0.19842 | 0.54806 | Biso | 1 | O | -0.597032 |
| O16  | 1 | 0.58234 | 0.14587 | 0.54844 | Biso | 1 | O | -0.551105 |
| C78  | 1 | 0.5986  | 0.1795  | 0.5623  | Biso | 1 | C | 0.609879  |
| C79  | 1 | 0.5785  | 0.2055  | 0.6006  | Biso | 1 | C | -0.035362 |
| C80  | 1 | 0.5954  | 0.2434  | 0.618   | Biso | 1 | C | -0.08831  |
| H43  | 1 | 0.6208  | 0.2544  | 0.605   | Biso | 1 | H | 0.121925  |
| C81  | 1 | 0.5765  | 0.2658  | 0.6535  | Biso | 1 | C | -0.158811 |
| H44  | 1 | 0.5879  | 0.2921  | 0.6638  | Biso | 1 | H | 0.126237  |
| C82  | 1 | 0.5383  | 0.2474  | 0.6746  | Biso | 1 | C | 0.072992  |
| C83  | 1 | 0.5208  | 0.2093  | 0.6571  | Biso | 1 | C | -0.16045  |
| H45  | 1 | 0.4954  | 0.198   | 0.67    | Biso | 1 | H | 0.12197   |
| C84  | 1 | 0.5406  | 0.1877  | 0.6205  | Biso | 1 | C | -0.110195 |
| H46  | 1 | 0.529   | 0.1618  | 0.6093  | Biso | 1 | H | 0.123361  |
| C85  | 1 | 0.5165  | 0.2727  | 0.7138  | Biso | 1 | C | 0.094724  |
| C86  | 1 | 0.5165  | 0.3161  | 0.7143  | Biso | 1 | C | -0.215454 |
| H47  | 1 | 0.5282  | 0.3308  | 0.6892  | Biso | 1 | H | 0.122749  |
| C87  | 1 | 0.46111 | 0.40942 | 0.75069 | Biso | 1 | C | 0.182527  |
| C88  | 1 | 0.41887 | 0.38737 | 0.7502  | Biso | 1 | C | -0.205467 |
| H48  | 1 | 0.4143  | 0.3574  | 0.7502  | Biso | 1 | H | 0.137014  |
| O17  | 1 | 0.69842 | 0.13417 | 0.45194 | Biso | 1 | O | -0.597088 |
| O18  | 1 | 0.64587 | 0.08234 | 0.45156 | Biso | 1 | O | -0.551214 |
| C89  | 1 | 0.6795  | 0.0986  | 0.4377  | Biso | 1 | C | 0.610069  |
| C90  | 1 | 0.7055  | 0.0785  | 0.3994  | Biso | 1 | C | -0.035433 |
| C91  | 1 | 0.7434  | 0.0954  | 0.382   | Biso | 1 | C | -0.088349 |
| H49  | 1 | 0.7544  | 0.1208  | 0.395   | Biso | 1 | H | 0.121944  |
| C92  | 1 | 0.7658  | 0.0765  | 0.3465  | Biso | 1 | C | -0.158853 |
| H50  | 1 | 0.7921  | 0.0879  | 0.3362  | Biso | 1 | H | 0.126311  |
| C93  | 1 | 0.7474  | 0.0383  | 0.3254  | Biso | 1 | C | 0.073137  |
| C94  | 1 | 0.7093  | 0.0208  | 0.3429  | Biso | 1 | C | -0.160473 |
| H51  | 1 | 0.698   | 0.9954  | 0.33    | Biso | 1 | H | 0.12207   |
| C95  | 1 | 0.6877  | 0.0406  | 0.3795  | Biso | 1 | C | -0.110428 |
| H52  | 1 | 0.6618  | 0.029   | 0.3907  | Biso | 1 | H | 0.123409  |
| C96  | 1 | 0.7727  | 0.0165  | 0.2862  | Biso | 1 | C | 0.094444  |
| C97  | 1 | 0.8161  | 0.0165  | 0.2857  | Biso | 1 | C | -0.215375 |
| H53  | 1 | 0.8308  | 0.0282  | 0.3108  | Biso | 1 | H | 0.122494  |
| C98  | 1 | 0.90942 | 0.96111 | 0.24931 | Biso | 1 | C | 0.18243   |
| C99  | 1 | 0.88737 | 0.91887 | 0.2498  | Biso | 1 | C | -0.205469 |
| H54  | 1 | 0.8574  | 0.9143  | 0.2498  | Biso | 1 | H | 0.137132  |
| O19  | 1 | 0.19842 | 0.63417 | 0.95194 | Biso | 1 | O | -0.597231 |
| O20  | 1 | 0.14587 | 0.58234 | 0.95156 | Biso | 1 | O | -0.551346 |
| C100 | 1 | 0.1795  | 0.5986  | 0.9377  | Biso | 1 | C | 0.610373  |
| C101 | 1 | 0.2055  | 0.5785  | 0.8994  | Biso | 1 | C | -0.035768 |
| C102 | 1 | 0.2434  | 0.5954  | 0.882   | Biso | 1 | C | -0.088299 |
| H55  | 1 | 0.2544  | 0.6208  | 0.895   | Biso | 1 | H | 0.121866  |
| C103 | 1 | 0.2658  | 0.5765  | 0.8465  | Biso | 1 | C | -0.158852 |
| H56  | 1 | 0.2921  | 0.5879  | 0.8362  | Biso | 1 | H | 0.126374  |
| C104 | 1 | 0.2474  | 0.5383  | 0.8254  | Biso | 1 | C | 0.07216   |
| C105 | 1 | 0.2093  | 0.5208  | 0.8429  | Biso | 1 | C | -0.160234 |
| H57  | 1 | 0.198   | 0.4954  | 0.83    | Biso | 1 | H | 0.122029  |

|      |   |         |         |         |      |   |   |           |  |
|------|---|---------|---------|---------|------|---|---|-----------|--|
| C106 | 1 | 0.1877  | 0.5406  | 0.8795  | Biso | 1 | C | -0.11034  |  |
| H58  | 1 | 0.1618  | 0.529   | 0.8907  | Biso | 1 | H | 0.123234  |  |
| C107 | 1 | 0.2727  | 0.5165  | 0.7862  | Biso | 1 | C | 0.097855  |  |
| C108 | 1 | 0.3161  | 0.5165  | 0.7857  | Biso | 1 | C | -0.216685 |  |
| H59  | 1 | 0.3308  | 0.5282  | 0.8108  | Biso | 1 | H | 0.122434  |  |
| C109 | 1 | 0.40942 | 0.46111 | 0.74931 | Biso | 1 | C | 0.182634  |  |
| C110 | 1 | 0.38737 | 0.41887 | 0.7498  | Biso | 1 | C | -0.205571 |  |
| H60  | 1 | 0.3574  | 0.4143  | 0.7498  | Biso | 1 | H | 0.137042  |  |
| O21  | 1 | 0.30158 | 0.86583 | 0.45194 | Biso | 1 | O | -0.596424 |  |
| O22  | 1 | 0.35413 | 0.91766 | 0.45156 | Biso | 1 | O | -0.551439 |  |
| C111 | 1 | 0.3205  | 0.9014  | 0.4377  | Biso | 1 | C | 0.609656  |  |
| C112 | 1 | 0.2945  | 0.9215  | 0.3994  | Biso | 1 | C | -0.035521 |  |
| C113 | 1 | 0.2566  | 0.9046  | 0.382   | Biso | 1 | C | -0.08817  |  |
| H61  | 1 | 0.2456  | 0.8792  | 0.395   | Biso | 1 | H | 0.122221  |  |
| C114 | 1 | 0.2342  | 0.9235  | 0.3465  | Biso | 1 | C | -0.158837 |  |
| H62  | 1 | 0.2079  | 0.9121  | 0.3362  | Biso | 1 | H | 0.126639  |  |
| C115 | 1 | 0.2526  | 0.9617  | 0.3254  | Biso | 1 | C | 0.073019  |  |
| C116 | 1 | 0.2907  | 0.9792  | 0.3429  | Biso | 1 | C | -0.160328 |  |
| H63  | 1 | 0.302   | 0.0046  | 0.33    | Biso | 1 | H | 0.12171   |  |
| C117 | 1 | 0.3123  | 0.9594  | 0.3795  | Biso | 1 | C | -0.110446 |  |
| H64  | 1 | 0.3382  | 0.971   | 0.3907  | Biso | 1 | H | 0.123115  |  |
| C118 | 1 | 0.2273  | 0.9835  | 0.2862  | Biso | 1 | C | 0.094533  |  |
| C119 | 1 | 0.1839  | 0.9835  | 0.2857  | Biso | 1 | C | -0.21546  |  |
| H65  | 1 | 0.1692  | 0.9718  | 0.3108  | Biso | 1 | H | 0.122657  |  |
| C120 | 1 | 0.09058 | 0.03889 | 0.24931 | Biso | 1 | C | 0.182507  |  |
| C121 | 1 | 0.11263 | 0.08113 | 0.2498  | Biso | 1 | C | -0.205567 |  |
| H66  | 1 | 0.1426  | 0.0857  | 0.2498  | Biso | 1 | H | 0.136869  |  |
| O23  | 1 | 0.80158 | 0.36583 | 0.95194 | Biso | 1 | O | -0.596615 |  |
| O24  | 1 | 0.85413 | 0.41766 | 0.95156 | Biso | 1 | O | -0.551555 |  |
| C122 | 1 | 0.8205  | 0.4014  | 0.9377  | Biso | 1 | C | 0.609941  |  |
| C123 | 1 | 0.7945  | 0.4215  | 0.8994  | Biso | 1 | C | -0.035745 |  |
| C124 | 1 | 0.7566  | 0.4046  | 0.882   | Biso | 1 | C | -0.088049 |  |
| H67  | 1 | 0.7456  | 0.3792  | 0.895   | Biso | 1 | H | 0.122054  |  |
| C125 | 1 | 0.7342  | 0.4235  | 0.8465  | Biso | 1 | C | -0.158876 |  |
| H68  | 1 | 0.7079  | 0.4121  | 0.8362  | Biso | 1 | H | 0.126751  |  |
| C126 | 1 | 0.7526  | 0.4617  | 0.8254  | Biso | 1 | C | 0.073159  |  |
| C127 | 1 | 0.7907  | 0.4792  | 0.8429  | Biso | 1 | C | -0.160321 |  |
| H69  | 1 | 0.802   | 0.5046  | 0.83    | Biso | 1 | H | 0.121748  |  |
| C128 | 1 | 0.8123  | 0.4594  | 0.8795  | Biso | 1 | C | -0.110382 |  |
| H70  | 1 | 0.8382  | 0.471   | 0.8907  | Biso | 1 | H | 0.123006  |  |
| C129 | 1 | 0.7273  | 0.4835  | 0.7862  | Biso | 1 | C | 0.094519  |  |
| C130 | 1 | 0.6839  | 0.4835  | 0.7857  | Biso | 1 | C | -0.215691 |  |
| H71  | 1 | 0.6692  | 0.4718  | 0.8108  | Biso | 1 | H | 0.122632  |  |
| C131 | 1 | 0.59058 | 0.53889 | 0.74931 | Biso | 1 | C | 0.182539  |  |
| C132 | 1 | 0.61263 | 0.58113 | 0.7498  | Biso | 1 | C | -0.205666 |  |
| H72  | 1 | 0.6426  | 0.5857  | 0.7498  | Biso | 1 | H | 0.136752  |  |
| O25  | 1 | 0.13417 | 0.30158 | 0.45194 | Biso | 1 | O | -0.596872 |  |
| O26  | 1 | 0.08234 | 0.35413 | 0.45156 | Biso | 1 | O | -0.551384 |  |
| C133 | 1 | 0.0986  | 0.3205  | 0.4377  | Biso | 1 | C | 0.610049  |  |
| C134 | 1 | 0.0785  | 0.2945  | 0.3994  | Biso | 1 | C | -0.035534 |  |
| C135 | 1 | 0.0954  | 0.2566  | 0.382   | Biso | 1 | C | -0.088275 |  |
| H73  | 1 | 0.1208  | 0.2456  | 0.395   | Biso | 1 | H | 0.122039  |  |

|      |   |         |        |         |      |         |      |           |   |           |
|------|---|---------|--------|---------|------|---------|------|-----------|---|-----------|
| C136 | 1 | 0.0765  | 0.2342 | 0.3465  | Biso | 1       | C    | -0.158813 |   |           |
| H74  | 1 | 0.0879  | 0.2079 | 0.3362  | Biso | 1       | H    | 0.126525  |   |           |
| C137 | 1 | 0.0383  | 0.2526 | 0.3254  | Biso | 1       | C    | 0.07313   |   |           |
| C138 | 1 | 0.0208  | 0.2907 | 0.3429  | Biso | 1       | C    | -0.160337 |   |           |
| H75  | 1 | 0.9954  | 0.302  | 0.33    | Biso | 1       | H    | 0.12189   |   |           |
| C139 | 1 | 0.0406  | 0.3123 | 0.3795  | Biso | 1       | C    | -0.110433 |   |           |
| H76  | 1 | 0.029   | 0.3382 | 0.3907  | Biso | 1       | H    | 0.123177  |   |           |
| C140 | 1 | 0.0165  | 0.2273 | 0.2862  | Biso | 1       | C    | 0.09453   |   |           |
| C141 | 1 | 0.0165  | 0.1839 | 0.2857  | Biso | 1       | C    | -0.215444 |   |           |
| H77  | 1 | 0.0282  | 0.1692 | 0.3108  | Biso | 1       | H    | 0.122606  |   |           |
| C142 | 1 | 0.96111 |        | 0.09058 |      | 0.24931 | Biso | 1         | C | 0.18235   |
| C143 | 1 | 0.91887 |        | 0.11263 |      | 0.2498  | Biso | 1         | C | -0.205478 |
| H78  | 1 | 0.9143  | 0.1426 | 0.2498  | Biso | 1       | H    | 0.136901  |   |           |
| O27  | 1 | 0.63417 |        | 0.80158 |      | 0.95194 | Biso | 1         | O | -0.596937 |
| O28  | 1 | 0.58234 |        | 0.85413 |      | 0.95156 | Biso | 1         | O | -0.551536 |
| C144 | 1 | 0.5986  | 0.8205 | 0.9377  | Biso | 1       | C    | 0.610318  |   |           |
| C145 | 1 | 0.5785  | 0.7945 | 0.8994  | Biso | 1       | C    | -0.035868 |   |           |
| C146 | 1 | 0.5954  | 0.7566 | 0.882   | Biso | 1       | C    | -0.088102 |   |           |
| H79  | 1 | 0.6208  | 0.7456 | 0.895   | Biso | 1       | H    | 0.121932  |   |           |
| C147 | 1 | 0.5765  | 0.7342 | 0.8465  | Biso | 1       | C    | -0.158828 |   |           |
| H80  | 1 | 0.5879  | 0.7079 | 0.8362  | Biso | 1       | H    | 0.126572  |   |           |
| C148 | 1 | 0.5383  | 0.7526 | 0.8254  | Biso | 1       | C    | 0.073079  |   |           |
| C149 | 1 | 0.5208  | 0.7907 | 0.8429  | Biso | 1       | C    | -0.160105 |   |           |
| H81  | 1 | 0.4954  | 0.802  | 0.83    | Biso | 1       | H    | 0.121898  |   |           |
| C150 | 1 | 0.5406  | 0.8123 | 0.8795  | Biso | 1       | C    | -0.110426 |   |           |
| H82  | 1 | 0.529   | 0.8382 | 0.8907  | Biso | 1       | H    | 0.123057  |   |           |
| C151 | 1 | 0.5165  | 0.7273 | 0.7862  | Biso | 1       | C    | 0.094731  |   |           |
| C152 | 1 | 0.5165  | 0.6839 | 0.7857  | Biso | 1       | C    | -0.215797 |   |           |
| H83  | 1 | 0.5282  | 0.6692 | 0.8108  | Biso | 1       | H    | 0.12259   |   |           |
| C153 | 1 | 0.46111 |        | 0.59058 |      | 0.74931 | Biso | 1         | C | 0.182732  |
| C154 | 1 | 0.41887 |        | 0.61263 |      | 0.7498  | Biso | 1         | C | -0.205779 |
| H84  | 1 | 0.4143  | 0.6426 | 0.7498  | Biso | 1       | H    | 0.136856  |   |           |
| O29  | 1 | 0.86583 |        | 0.69842 |      | 0.45194 | Biso | 1         | O | -0.596751 |
| O30  | 1 | 0.91766 |        | 0.64587 |      | 0.45156 | Biso | 1         | O | -0.55132  |
| C155 | 1 | 0.9014  | 0.6795 | 0.4377  | Biso | 1       | C    | 0.609791  |   |           |
| C156 | 1 | 0.9215  | 0.7055 | 0.3994  | Biso | 1       | C    | -0.035349 |   |           |
| C157 | 1 | 0.9046  | 0.7434 | 0.382   | Biso | 1       | C    | -0.088308 |   |           |
| H85  | 1 | 0.8792  | 0.7544 | 0.395   | Biso | 1       | H    | 0.122136  |   |           |
| C158 | 1 | 0.9235  | 0.7658 | 0.3465  | Biso | 1       | C    | -0.158838 |   |           |
| H86  | 1 | 0.9121  | 0.7921 | 0.3362  | Biso | 1       | H    | 0.12646   |   |           |
| C159 | 1 | 0.9617  | 0.7474 | 0.3254  | Biso | 1       | C    | 0.072955  |   |           |
| C160 | 1 | 0.9792  | 0.7093 | 0.3429  | Biso | 1       | C    | -0.160214 |   |           |
| H87  | 1 | 0.0046  | 0.698  | 0.33    | Biso | 1       | H    | 0.121758  |   |           |
| C161 | 1 | 0.9594  | 0.6877 | 0.3795  | Biso | 1       | C    | -0.110511 |   |           |
| H88  | 1 | 0.971   | 0.6618 | 0.3907  | Biso | 1       | H    | 0.123329  |   |           |
| C162 | 1 | 0.9835  | 0.7727 | 0.2862  | Biso | 1       | C    | 0.094454  |   |           |
| C163 | 1 | 0.9835  | 0.8161 | 0.2857  | Biso | 1       | C    | -0.21548  |   |           |
| H89  | 1 | 0.9718  | 0.8308 | 0.3108  | Biso | 1       | H    | 0.122583  |   |           |
| C164 | 1 | 0.03889 |        | 0.90942 |      | 0.24931 | Biso | 1         | C | 0.18254   |
| C165 | 1 | 0.08113 |        | 0.88737 |      | 0.2498  | Biso | 1         | C | -0.205364 |
| H90  | 1 | 0.0857  | 0.8574 | 0.2498  | Biso | 1       | H    | 0.137065  |   |           |
| O31  | 1 | 0.36583 |        | 0.19842 |      | 0.95194 | Biso | 1         | O | -0.596871 |

|      |   |         |         |         |      |   |   |           |
|------|---|---------|---------|---------|------|---|---|-----------|
| O32  | 1 | 0.41766 | 0.14587 | 0.95156 | Biso | 1 | O | -0.551429 |
| C166 | 1 | 0.4014  | 0.1795  | 0.9377  | Biso | 1 | C | 0.609997  |
| C167 | 1 | 0.4215  | 0.2055  | 0.8994  | Biso | 1 | C | -0.035575 |
| C168 | 1 | 0.4046  | 0.2434  | 0.882   | Biso | 1 | C | -0.08823  |
| H91  | 1 | 0.3792  | 0.2544  | 0.895   | Biso | 1 | H | 0.12204   |
| C169 | 1 | 0.4235  | 0.2658  | 0.8465  | Biso | 1 | C | -0.158971 |
| H92  | 1 | 0.4121  | 0.2921  | 0.8362  | Biso | 1 | H | 0.126548  |
| C170 | 1 | 0.4617  | 0.2474  | 0.8254  | Biso | 1 | C | 0.072234  |
| C171 | 1 | 0.4792  | 0.2093  | 0.8429  | Biso | 1 | C | -0.160292 |
| H93  | 1 | 0.5046  | 0.198   | 0.83    | Biso | 1 | H | 0.121812  |
| C172 | 1 | 0.4594  | 0.1877  | 0.8795  | Biso | 1 | C | -0.110442 |
| H94  | 1 | 0.471   | 0.1618  | 0.8907  | Biso | 1 | H | 0.123192  |
| C173 | 1 | 0.4835  | 0.2727  | 0.7862  | Biso | 1 | C | 0.097769  |
| C174 | 1 | 0.4835  | 0.3161  | 0.7857  | Biso | 1 | C | -0.216672 |
| H95  | 1 | 0.4718  | 0.3308  | 0.8108  | Biso | 1 | H | 0.122494  |
| C175 | 1 | 0.53889 | 0.40942 | 0.74931 | Biso | 1 | C | 0.182417  |
| C176 | 1 | 0.58113 | 0.38737 | 0.7498  | Biso | 1 | C | -0.205389 |
| H96  | 1 | 0.5857  | 0.3574  | 0.7498  | Biso | 1 | H | 0.136967  |
| O33  | 1 | 0.69842 | 0.86583 | 0.95194 | Biso | 1 | O | -0.59681  |
| O34  | 1 | 0.64587 | 0.91766 | 0.95156 | Biso | 1 | O | -0.551386 |
| C177 | 1 | 0.6795  | 0.9014  | 0.9377  | Biso | 1 | C | 0.609792  |
| C178 | 1 | 0.7055  | 0.9215  | 0.8994  | Biso | 1 | C | -0.035413 |
| C179 | 1 | 0.7434  | 0.9046  | 0.882   | Biso | 1 | C | -0.088344 |
| H97  | 1 | 0.7544  | 0.8792  | 0.895   | Biso | 1 | H | 0.12213   |
| C180 | 1 | 0.7658  | 0.9235  | 0.8465  | Biso | 1 | C | -0.158849 |
| H98  | 1 | 0.7921  | 0.9121  | 0.8362  | Biso | 1 | H | 0.126499  |
| C181 | 1 | 0.7474  | 0.9617  | 0.8254  | Biso | 1 | C | 0.073157  |
| C182 | 1 | 0.7093  | 0.9792  | 0.8429  | Biso | 1 | C | -0.160363 |
| H99  | 1 | 0.698   | 0.0046  | 0.83    | Biso | 1 | H | 0.121862  |
| C183 | 1 | 0.6877  | 0.9594  | 0.8795  | Biso | 1 | C | -0.110528 |
| H100 | 1 | 0.6618  | 0.971   | 0.8907  | Biso | 1 | H | 0.123317  |
| C184 | 1 | 0.7727  | 0.9835  | 0.7862  | Biso | 1 | C | 0.094441  |
| C185 | 1 | 0.8161  | 0.9835  | 0.7857  | Biso | 1 | C | -0.215676 |
| H101 | 1 | 0.8308  | 0.9718  | 0.8108  | Biso | 1 | H | 0.12245   |
| C186 | 1 | 0.90942 | 0.03889 | 0.74931 | Biso | 1 | C | 0.182626  |
| C187 | 1 | 0.88737 | 0.08113 | 0.7498  | Biso | 1 | C | -0.205401 |
| H102 | 1 | 0.8574  | 0.0857  | 0.7498  | Biso | 1 | H | 0.137064  |
| O35  | 1 | 0.19842 | 0.36583 | 0.45194 | Biso | 1 | O | -0.596816 |
| O36  | 1 | 0.14587 | 0.41766 | 0.45156 | Biso | 1 | O | -0.551331 |
| C188 | 1 | 0.1795  | 0.4014  | 0.4377  | Biso | 1 | C | 0.609931  |
| C189 | 1 | 0.2055  | 0.4215  | 0.3994  | Biso | 1 | C | -0.03545  |
| C190 | 1 | 0.2434  | 0.4046  | 0.382   | Biso | 1 | C | -0.088348 |
| H103 | 1 | 0.2544  | 0.3792  | 0.395   | Biso | 1 | H | 0.122121  |
| C191 | 1 | 0.2658  | 0.4235  | 0.3465  | Biso | 1 | C | -0.158821 |
| H104 | 1 | 0.2921  | 0.4121  | 0.3362  | Biso | 1 | H | 0.126474  |
| C192 | 1 | 0.2474  | 0.4617  | 0.3254  | Biso | 1 | C | 0.073008  |
| C193 | 1 | 0.2093  | 0.4792  | 0.3429  | Biso | 1 | C | -0.160245 |
| H105 | 1 | 0.198   | 0.5046  | 0.33    | Biso | 1 | H | 0.121768  |
| C194 | 1 | 0.1877  | 0.4594  | 0.3795  | Biso | 1 | C | -0.110428 |
| H106 | 1 | 0.1618  | 0.471   | 0.3907  | Biso | 1 | H | 0.123259  |
| C195 | 1 | 0.2727  | 0.4835  | 0.2862  | Biso | 1 | C | 0.094642  |
| C196 | 1 | 0.3161  | 0.4835  | 0.2857  | Biso | 1 | C | -0.215452 |

|      |   |         |        |         |      |         |      |           |   |           |
|------|---|---------|--------|---------|------|---------|------|-----------|---|-----------|
| H107 | 1 | 0.3308  | 0.4718 | 0.3108  | Biso | 1       | H    | 0.122592  |   |           |
| C197 | 1 | 0.40942 |        | 0.53889 |      | 0.24931 | Biso | 1         | C | 0.182475  |
| C198 | 1 | 0.38737 |        | 0.58113 |      | 0.2498  | Biso | 1         | C | -0.205341 |
| H108 | 1 | 0.3574  | 0.5857 | 0.2498  | Biso | 1       | H    | 0.136949  |   |           |
| O37  | 1 | 0.30158 |        | 0.13417 |      | 0.95194 | Biso | 1         | O | -0.596968 |
| O38  | 1 | 0.35413 |        | 0.08234 |      | 0.95156 | Biso | 1         | O | -0.551503 |
| C199 | 1 | 0.3205  | 0.0986 | 0.9377  | Biso | 1       | C    | 0.610228  |   |           |
| C200 | 1 | 0.2945  | 0.0785 | 0.8994  | Biso | 1       | C    | -0.035694 |   |           |
| C201 | 1 | 0.2566  | 0.0954 | 0.882   | Biso | 1       | C    | -0.088173 |   |           |
| H109 | 1 | 0.2456  | 0.1208 | 0.895   | Biso | 1       | H    | 0.121955  |   |           |
| C202 | 1 | 0.2342  | 0.0765 | 0.8465  | Biso | 1       | C    | -0.158841 |   |           |
| H110 | 1 | 0.2079  | 0.0879 | 0.8362  | Biso | 1       | H    | 0.126577  |   |           |
| C203 | 1 | 0.2526  | 0.0383 | 0.8254  | Biso | 1       | C    | 0.073165  |   |           |
| C204 | 1 | 0.2907  | 0.0208 | 0.8429  | Biso | 1       | C    | -0.160287 |   |           |
| H111 | 1 | 0.302   | 0.9954 | 0.83    | Biso | 1       | H    | 0.121925  |   |           |
| C205 | 1 | 0.3123  | 0.0406 | 0.8795  | Biso | 1       | C    | -0.110399 |   |           |
| H112 | 1 | 0.3382  | 0.029  | 0.8907  | Biso | 1       | H    | 0.123099  |   |           |
| C206 | 1 | 0.2273  | 0.0165 | 0.7862  | Biso | 1       | C    | 0.094553  |   |           |
| C207 | 1 | 0.1839  | 0.0165 | 0.7857  | Biso | 1       | C    | -0.215721 |   |           |
| H113 | 1 | 0.1692  | 0.0282 | 0.8108  | Biso | 1       | H    | 0.122562  |   |           |
| C208 | 1 | 0.09058 |        | 0.96111 |      | 0.74931 | Biso | 1         | C | 0.182375  |
| C209 | 1 | 0.11263 |        | 0.91887 |      | 0.7498  | Biso | 1         | C | -0.205552 |
| H114 | 1 | 0.1426  | 0.9143 | 0.7498  | Biso | 1       | H    | 0.136921  |   |           |
| O39  | 1 | 0.80158 |        | 0.63417 |      | 0.45194 | Biso | 1         | O | -0.596864 |
| O40  | 1 | 0.85413 |        | 0.58234 |      | 0.45156 | Biso | 1         | O | -0.551458 |
| C210 | 1 | 0.8205  | 0.5986 | 0.4377  | Biso | 1       | C    | 0.610174  |   |           |
| C211 | 1 | 0.7945  | 0.5785 | 0.3994  | Biso | 1       | C    | -0.035699 |   |           |
| C212 | 1 | 0.7566  | 0.5954 | 0.382   | Biso | 1       | C    | -0.088116 |   |           |
| H115 | 1 | 0.7456  | 0.6208 | 0.395   | Biso | 1       | H    | 0.121915  |   |           |
| C213 | 1 | 0.7342  | 0.5765 | 0.3465  | Biso | 1       | C    | -0.158786 |   |           |
| H116 | 1 | 0.7079  | 0.5879 | 0.3362  | Biso | 1       | H    | 0.126512  |   |           |
| C214 | 1 | 0.7526  | 0.5383 | 0.3254  | Biso | 1       | C    | 0.073168  |   |           |
| C215 | 1 | 0.7907  | 0.5208 | 0.3429  | Biso | 1       | C    | -0.160277 |   |           |
| H117 | 1 | 0.802   | 0.4954 | 0.33    | Biso | 1       | H    | 0.121888  |   |           |
| C216 | 1 | 0.8123  | 0.5406 | 0.3795  | Biso | 1       | C    | -0.110385 |   |           |
| H118 | 1 | 0.8382  | 0.529  | 0.3907  | Biso | 1       | H    | 0.123128  |   |           |
| C217 | 1 | 0.7273  | 0.5165 | 0.2862  | Biso | 1       | C    | 0.09458   |   |           |
| C218 | 1 | 0.6839  | 0.5165 | 0.2857  | Biso | 1       | C    | -0.215649 |   |           |
| H119 | 1 | 0.6692  | 0.5282 | 0.3108  | Biso | 1       | H    | 0.122675  |   |           |
| C219 | 1 | 0.59058 |        | 0.46111 |      | 0.24931 | Biso | 1         | C | 0.182798  |
| C220 | 1 | 0.61263 |        | 0.41887 |      | 0.2498  | Biso | 1         | C | -0.205685 |
| H120 | 1 | 0.6426  | 0.4143 | 0.2498  | Biso | 1       | H    | 0.136791  |   |           |
| O41  | 1 | 0.13417 |        | 0.69842 |      | 0.95194 | Biso | 1         | O | -0.597165 |
| O42  | 1 | 0.08234 |        | 0.64587 |      | 0.95156 | Biso | 1         | O | -0.551279 |
| C221 | 1 | 0.0986  | 0.6795 | 0.9377  | Biso | 1       | C    | 0.610118  |   |           |
| C222 | 1 | 0.0785  | 0.7055 | 0.8994  | Biso | 1       | C    | -0.035502 |   |           |
| C223 | 1 | 0.0954  | 0.7434 | 0.882   | Biso | 1       | C    | -0.088335 |   |           |
| H121 | 1 | 0.1208  | 0.7544 | 0.895   | Biso | 1       | H    | 0.121875  |   |           |
| C224 | 1 | 0.0765  | 0.7658 | 0.8465  | Biso | 1       | C    | -0.158775 |   |           |
| H122 | 1 | 0.0879  | 0.7921 | 0.8362  | Biso | 1       | H    | 0.126273  |   |           |
| C225 | 1 | 0.0383  | 0.7474 | 0.8254  | Biso | 1       | C    | 0.072233  |   |           |
| C226 | 1 | 0.0208  | 0.7093 | 0.8429  | Biso | 1       | C    | -0.160429 |   |           |

|      |   |         |        |         |      |         |      |           |   |           |
|------|---|---------|--------|---------|------|---------|------|-----------|---|-----------|
| H123 | 1 | 0.9954  | 0.698  | 0.83    | Biso | 1       | H    | 0.122071  |   |           |
| C227 | 1 | 0.0406  | 0.6877 | 0.8795  | Biso | 1       | C    | -0.110437 |   |           |
| H124 | 1 | 0.029   | 0.6618 | 0.8907  | Biso | 1       | H    | 0.123328  |   |           |
| C228 | 1 | 0.0165  | 0.7727 | 0.7862  | Biso | 1       | C    | 0.097754  |   |           |
| C229 | 1 | 0.0165  | 0.8161 | 0.7857  | Biso | 1       | C    | -0.216603 |   |           |
| H125 | 1 | 0.0282  | 0.8308 | 0.8108  | Biso | 1       | H    | 0.122378  |   |           |
| C230 | 1 | 0.96111 |        | 0.90942 |      | 0.74931 | Biso | 1         | C | 0.182394  |
| C231 | 1 | 0.91887 |        | 0.88737 |      | 0.7498  | Biso | 1         | C | -0.2055   |
| H126 | 1 | 0.9143  | 0.8574 | 0.7498  | Biso | 1       | H    | 0.137154  |   |           |
| O43  | 1 | 0.63417 |        | 0.19842 |      | 0.45194 | Biso | 1         | O | -0.597143 |
| O44  | 1 | 0.58234 |        | 0.14587 |      | 0.45156 | Biso | 1         | O | -0.551256 |
| C232 | 1 | 0.5986  | 0.1795 | 0.4377  | Biso | 1       | C    | 0.610219  |   |           |
| C233 | 1 | 0.5785  | 0.2055 | 0.3994  | Biso | 1       | C    | -0.035616 |   |           |
| C234 | 1 | 0.5954  | 0.2434 | 0.382   | Biso | 1       | C    | -0.088134 |   |           |
| H127 | 1 | 0.6208  | 0.2544 | 0.395   | Biso | 1       | H    | 0.121838  |   |           |
| C235 | 1 | 0.5765  | 0.2658 | 0.3465  | Biso | 1       | C    | -0.158934 |   |           |
| H128 | 1 | 0.5879  | 0.2921 | 0.3362  | Biso | 1       | H    | 0.12634   |   |           |
| C236 | 1 | 0.5383  | 0.2474 | 0.3254  | Biso | 1       | C    | 0.073214  |   |           |
| C237 | 1 | 0.5208  | 0.2093 | 0.3429  | Biso | 1       | C    | -0.160316 |   |           |
| H129 | 1 | 0.4954  | 0.198  | 0.33    | Biso | 1       | H    | 0.122025  |   |           |
| C238 | 1 | 0.5406  | 0.1877 | 0.3795  | Biso | 1       | C    | -0.110388 |   |           |
| H130 | 1 | 0.529   | 0.1618 | 0.3907  | Biso | 1       | H    | 0.123315  |   |           |
| C239 | 1 | 0.5165  | 0.2727 | 0.2862  | Biso | 1       | C    | 0.094408  |   |           |
| C240 | 1 | 0.5165  | 0.3161 | 0.2857  | Biso | 1       | C    | -0.215448 |   |           |
| H131 | 1 | 0.5282  | 0.3308 | 0.3108  | Biso | 1       | H    | 0.122534  |   |           |
| C241 | 1 | 0.46111 |        | 0.40942 |      | 0.24931 | Biso | 1         | C | 0.182686  |
| C242 | 1 | 0.41887 |        | 0.38737 |      | 0.2498  | Biso | 1         | C | -0.205554 |
| H132 | 1 | 0.4143  | 0.3574 | 0.2498  | Biso | 1       | H    | 0.136994  |   |           |
| O45  | 1 | 0.86583 |        | 0.30158 |      | 0.95194 | Biso | 1         | O | -0.596553 |
| O46  | 1 | 0.91766 |        | 0.35413 |      | 0.95156 | Biso | 1         | O | -0.551565 |
| C243 | 1 | 0.9014  | 0.3205 | 0.9377  | Biso | 1       | C    | 0.60984   |   |           |
| C244 | 1 | 0.9215  | 0.2945 | 0.8994  | Biso | 1       | C    | -0.035518 |   |           |
| C245 | 1 | 0.9046  | 0.2566 | 0.882   | Biso | 1       | C    | -0.088155 |   |           |
| H133 | 1 | 0.8792  | 0.2456 | 0.895   | Biso | 1       | H    | 0.12214   |   |           |
| C246 | 1 | 0.9235  | 0.2342 | 0.8465  | Biso | 1       | C    | -0.158951 |   |           |
| H134 | 1 | 0.9121  | 0.2079 | 0.8362  | Biso | 1       | H    | 0.126723  |   |           |
| C247 | 1 | 0.9617  | 0.2526 | 0.8254  | Biso | 1       | C    | 0.073072  |   |           |
| C248 | 1 | 0.9792  | 0.2907 | 0.8429  | Biso | 1       | C    | -0.160182 |   |           |
| H135 | 1 | 0.0046  | 0.302  | 0.83    | Biso | 1       | H    | 0.12172   |   |           |
| C249 | 1 | 0.9594  | 0.3123 | 0.8795  | Biso | 1       | C    | -0.11061  |   |           |
| H136 | 1 | 0.971   | 0.3382 | 0.8907  | Biso | 1       | H    | 0.123123  |   |           |
| C250 | 1 | 0.9835  | 0.2273 | 0.7862  | Biso | 1       | C    | 0.094539  |   |           |
| C251 | 1 | 0.9835  | 0.1839 | 0.7857  | Biso | 1       | C    | -0.215736 |   |           |
| H137 | 1 | 0.9718  | 0.1692 | 0.8108  | Biso | 1       | H    | 0.122653  |   |           |
| C252 | 1 | 0.03889 |        | 0.09058 |      | 0.74931 | Biso | 1         | C | 0.182582  |
| C253 | 1 | 0.08113 |        | 0.11263 |      | 0.7498  | Biso | 1         | C | -0.205581 |
| H138 | 1 | 0.0857  | 0.1426 | 0.7498  | Biso | 1       | H    | 0.136876  |   |           |
| O47  | 1 | 0.36583 |        | 0.80158 |      | 0.45194 | Biso | 1         | O | -0.596571 |
| O48  | 1 | 0.41766 |        | 0.85413 |      | 0.45156 | Biso | 1         | O | -0.551484 |
| C254 | 1 | 0.4014  | 0.8205 | 0.4377  | Biso | 1       | C    | 0.609855  |   |           |
| C255 | 1 | 0.4215  | 0.7945 | 0.3994  | Biso | 1       | C    | -0.03565  |   |           |
| C256 | 1 | 0.4046  | 0.7566 | 0.382   | Biso | 1       | C    | -0.088101 |   |           |

|      |   |         |        |         |      |         |      |           |   |           |
|------|---|---------|--------|---------|------|---------|------|-----------|---|-----------|
| H139 | 1 | 0.3792  | 0.7456 | 0.395   | Biso | 1       | H    | 0.122149  |   |           |
| C257 | 1 | 0.4235  | 0.7342 | 0.3465  | Biso | 1       | C    | -0.158843 |   |           |
| H140 | 1 | 0.4121  | 0.7079 | 0.3362  | Biso | 1       | H    | 0.126682  |   |           |
| C258 | 1 | 0.4617  | 0.7526 | 0.3254  | Biso | 1       | C    | 0.073052  |   |           |
| C259 | 1 | 0.4792  | 0.7907 | 0.3429  | Biso | 1       | C    | -0.160299 |   |           |
| H141 | 1 | 0.5046  | 0.802  | 0.33    | Biso | 1       | H    | 0.121747  |   |           |
| C260 | 1 | 0.4594  | 0.8123 | 0.3795  | Biso | 1       | C    | -0.11045  |   |           |
| H142 | 1 | 0.471   | 0.8382 | 0.3907  | Biso | 1       | H    | 0.123089  |   |           |
| C261 | 1 | 0.4835  | 0.7273 | 0.2862  | Biso | 1       | C    | 0.094573  |   |           |
| C262 | 1 | 0.4835  | 0.6839 | 0.2857  | Biso | 1       | C    | -0.215485 |   |           |
| H143 | 1 | 0.4718  | 0.6692 | 0.3108  | Biso | 1       | H    | 0.122689  |   |           |
| C263 | 1 | 0.53889 |        | 0.59058 |      | 0.24931 | Biso | 1         | C | 0.182417  |
| C264 | 1 | 0.58113 |        | 0.61263 |      | 0.2498  | Biso | 1         | C | -0.205662 |
| H144 | 1 | 0.5857  | 0.6426 | 0.2498  | Biso | 1       | H    | 0.136782  |   |           |
| O49  | 1 | 0.30158 |        | 0.86583 |      | 0.54806 | Biso | 1         | O | -0.596335 |
| O50  | 1 | 0.35413 |        | 0.91766 |      | 0.54844 | Biso | 1         | O | -0.551309 |
| C265 | 1 | 0.3205  | 0.9014 | 0.5623  | Biso | 1       | C    | 0.609445  |   |           |
| C266 | 1 | 0.2945  | 0.9215 | 0.6006  | Biso | 1       | C    | -0.035347 |   |           |
| C267 | 1 | 0.2566  | 0.9046 | 0.618   | Biso | 1       | C    | -0.088306 |   |           |
| H145 | 1 | 0.2456  | 0.8792 | 0.605   | Biso | 1       | H    | 0.122396  |   |           |
| C268 | 1 | 0.2342  | 0.9235 | 0.6535  | Biso | 1       | C    | -0.158912 |   |           |
| H146 | 1 | 0.2079  | 0.9121 | 0.6638  | Biso | 1       | H    | 0.126608  |   |           |
| C269 | 1 | 0.2526  | 0.9617 | 0.6746  | Biso | 1       | C    | 0.072955  |   |           |
| C270 | 1 | 0.2907  | 0.9792 | 0.6571  | Biso | 1       | C    | -0.160435 |   |           |
| H147 | 1 | 0.302   | 0.0046 | 0.67    | Biso | 1       | H    | 0.121707  |   |           |
| C271 | 1 | 0.3123  | 0.9594 | 0.6205  | Biso | 1       | C    | -0.110549 |   |           |
| H148 | 1 | 0.3382  | 0.971  | 0.6093  | Biso | 1       | H    | 0.123265  |   |           |
| C272 | 1 | 0.2273  | 0.9835 | 0.7138  | Biso | 1       | C    | 0.094752  |   |           |
| C273 | 1 | 0.1839  | 0.9835 | 0.7143  | Biso | 1       | C    | -0.215499 |   |           |
| H149 | 1 | 0.1692  | 0.9718 | 0.6892  | Biso | 1       | H    | 0.122911  |   |           |
| C274 | 1 | 0.09058 |        | 0.03889 |      | 0.75069 | Biso | 1         | C | 0.182512  |
| C275 | 1 | 0.11263 |        | 0.08113 |      | 0.7502  | Biso | 1         | C | -0.205507 |
| H150 | 1 | 0.1426  | 0.0857 | 0.7502  | Biso | 1       | H    | 0.136877  |   |           |
| O51  | 1 | 0.80158 |        | 0.36583 |      | 0.04806 | Biso | 1         | O | -0.596387 |
| O52  | 1 | 0.85413 |        | 0.41766 |      | 0.04844 | Biso | 1         | O | -0.551369 |
| C276 | 1 | 0.8205  | 0.4014 | 0.0623  | Biso | 1       | C    | 0.609562  |   |           |
| C277 | 1 | 0.7945  | 0.4215 | 0.1006  | Biso | 1       | C    | -0.035463 |   |           |
| C278 | 1 | 0.7566  | 0.4046 | 0.118   | Biso | 1       | C    | -0.088173 |   |           |
| H151 | 1 | 0.7456  | 0.3792 | 0.105   | Biso | 1       | H    | 0.122221  |   |           |
| C279 | 1 | 0.7342  | 0.4235 | 0.1535  | Biso | 1       | C    | -0.158833 |   |           |
| H152 | 1 | 0.7079  | 0.4121 | 0.1638  | Biso | 1       | H    | 0.126649  |   |           |
| C280 | 1 | 0.7526  | 0.4617 | 0.1746  | Biso | 1       | C    | 0.072908  |   |           |
| C281 | 1 | 0.7907  | 0.4792 | 0.1571  | Biso | 1       | C    | -0.160402 |   |           |
| H153 | 1 | 0.802   | 0.5046 | 0.17    | Biso | 1       | H    | 0.121721  |   |           |
| C282 | 1 | 0.8123  | 0.4594 | 0.1205  | Biso | 1       | C    | -0.11039  |   |           |
| H154 | 1 | 0.8382  | 0.471  | 0.1093  | Biso | 1       | H    | 0.123101  |   |           |
| C283 | 1 | 0.7273  | 0.4835 | 0.2138  | Biso | 1       | C    | 0.094756  |   |           |
| C284 | 1 | 0.6839  | 0.4835 | 0.2143  | Biso | 1       | C    | -0.21544  |   |           |
| H155 | 1 | 0.6692  | 0.4718 | 0.1892  | Biso | 1       | H    | 0.122799  |   |           |
| C285 | 1 | 0.59058 |        | 0.53889 |      | 0.25069 | Biso | 1         | C | 0.182441  |
| C286 | 1 | 0.61263 |        | 0.58113 |      | 0.2502  | Biso | 1         | C | -0.205468 |
| H156 | 1 | 0.6426  | 0.5857 | 0.2502  | Biso | 1       | H    | 0.136677  |   |           |

|      |   |         |         |         |      |   |   |           |
|------|---|---------|---------|---------|------|---|---|-----------|
| O53  | 1 | 0.69842 | 0.13417 | 0.54806 | Biso | 1 | O | -0.59698  |
| O54  | 1 | 0.64587 | 0.08234 | 0.54844 | Biso | 1 | O | -0.551074 |
| C287 | 1 | 0.6795  | 0.0986  | 0.5623  | Biso | 1 | C | 0.609782  |
| C288 | 1 | 0.7055  | 0.0785  | 0.6006  | Biso | 1 | C | -0.035282 |
| C289 | 1 | 0.7434  | 0.0954  | 0.618   | Biso | 1 | C | -0.088385 |
| H157 | 1 | 0.7544  | 0.1208  | 0.605   | Biso | 1 | H | 0.122024  |
| C290 | 1 | 0.7658  | 0.0765  | 0.6535  | Biso | 1 | C | -0.158859 |
| H158 | 1 | 0.7921  | 0.0879  | 0.6638  | Biso | 1 | H | 0.12625   |
| C291 | 1 | 0.7474  | 0.0383  | 0.6746  | Biso | 1 | C | 0.073025  |
| C292 | 1 | 0.7093  | 0.0208  | 0.6571  | Biso | 1 | C | -0.160362 |
| H159 | 1 | 0.698   | 0.9954  | 0.67    | Biso | 1 | H | 0.121893  |
| C293 | 1 | 0.6877  | 0.0406  | 0.6205  | Biso | 1 | C | -0.110368 |
| H160 | 1 | 0.6618  | 0.029   | 0.6093  | Biso | 1 | H | 0.123462  |
| C294 | 1 | 0.7727  | 0.0165  | 0.7138  | Biso | 1 | C | 0.094698  |
| C295 | 1 | 0.8161  | 0.0165  | 0.7143  | Biso | 1 | C | -0.215297 |
| H161 | 1 | 0.8308  | 0.0282  | 0.6892  | Biso | 1 | H | 0.122731  |
| C296 | 1 | 0.90942 | 0.96111 | 0.75069 | Biso | 1 | C | 0.182454  |
| C297 | 1 | 0.88737 | 0.91887 | 0.7502  | Biso | 1 | C | -0.205314 |
| H162 | 1 | 0.8574  | 0.9143  | 0.7502  | Biso | 1 | H | 0.137071  |
| O55  | 1 | 0.19842 | 0.63417 | 0.04806 | Biso | 1 | O | -0.597089 |
| O56  | 1 | 0.14587 | 0.58234 | 0.04844 | Biso | 1 | O | -0.55112  |
| C298 | 1 | 0.1795  | 0.5986  | 0.0623  | Biso | 1 | C | 0.609987  |
| C299 | 1 | 0.2055  | 0.5785  | 0.1006  | Biso | 1 | C | -0.035362 |
| C300 | 1 | 0.2434  | 0.5954  | 0.118   | Biso | 1 | C | -0.088236 |
| H163 | 1 | 0.2544  | 0.6208  | 0.105   | Biso | 1 | H | 0.121874  |
| C301 | 1 | 0.2658  | 0.5765  | 0.1535  | Biso | 1 | C | -0.158949 |
| H164 | 1 | 0.2921  | 0.5879  | 0.1638  | Biso | 1 | H | 0.126289  |
| C302 | 1 | 0.2474  | 0.5383  | 0.1746  | Biso | 1 | C | 0.073129  |
| C303 | 1 | 0.2093  | 0.5208  | 0.1571  | Biso | 1 | C | -0.160336 |
| H165 | 1 | 0.198   | 0.4954  | 0.17    | Biso | 1 | H | 0.121923  |
| C304 | 1 | 0.1877  | 0.5406  | 0.1205  | Biso | 1 | C | -0.110287 |
| H166 | 1 | 0.1618  | 0.529   | 0.1093  | Biso | 1 | H | 0.123325  |
| C305 | 1 | 0.2727  | 0.5165  | 0.2138  | Biso | 1 | C | 0.094674  |
| C306 | 1 | 0.3161  | 0.5165  | 0.2143  | Biso | 1 | C | -0.215441 |
| H167 | 1 | 0.3308  | 0.5282  | 0.1892  | Biso | 1 | H | 0.122665  |
| C307 | 1 | 0.40942 | 0.46111 | 0.25069 | Biso | 1 | C | 0.182595  |
| C308 | 1 | 0.38737 | 0.41887 | 0.2502  | Biso | 1 | C | -0.205322 |
| H168 | 1 | 0.3574  | 0.4143  | 0.2502  | Biso | 1 | H | 0.136956  |
| O57  | 1 | 0.86583 | 0.69842 | 0.54806 | Biso | 1 | O | -0.596628 |
| O58  | 1 | 0.91766 | 0.64587 | 0.54844 | Biso | 1 | O | -0.551207 |
| C309 | 1 | 0.9014  | 0.6795  | 0.5623  | Biso | 1 | C | 0.609556  |
| C310 | 1 | 0.9215  | 0.7055  | 0.6006  | Biso | 1 | C | -0.035255 |
| C311 | 1 | 0.9046  | 0.7434  | 0.618   | Biso | 1 | C | -0.088342 |
| H169 | 1 | 0.8792  | 0.7544  | 0.605   | Biso | 1 | H | 0.122307  |
| C312 | 1 | 0.9235  | 0.7658  | 0.6535  | Biso | 1 | C | -0.158994 |
| H170 | 1 | 0.9121  | 0.7921  | 0.6638  | Biso | 1 | H | 0.126434  |
| C313 | 1 | 0.9617  | 0.7474  | 0.6746  | Biso | 1 | C | 0.072858  |
| C314 | 1 | 0.9792  | 0.7093  | 0.6571  | Biso | 1 | C | -0.160393 |
| H171 | 1 | 0.0046  | 0.698   | 0.67    | Biso | 1 | H | 0.121755  |
| C315 | 1 | 0.9594  | 0.6877  | 0.6205  | Biso | 1 | C | -0.110396 |
| H172 | 1 | 0.971   | 0.6618  | 0.6093  | Biso | 1 | H | 0.123377  |
| C316 | 1 | 0.9835  | 0.7727  | 0.7138  | Biso | 1 | C | 0.094592  |

|      |   |         |        |         |      |         |      |           |   |           |
|------|---|---------|--------|---------|------|---------|------|-----------|---|-----------|
| C317 | 1 | 0.9835  | 0.8161 | 0.7143  | Biso | 1       | C    | -0.215243 |   |           |
| H173 | 1 | 0.9718  | 0.8308 | 0.6892  | Biso | 1       | H    | 0.122768  |   |           |
| C318 | 1 | 0.03889 |        | 0.90942 |      | 0.75069 | Biso | 1         | C | 0.182566  |
| C319 | 1 | 0.08113 |        | 0.88737 |      | 0.7502  | Biso | 1         | C | -0.205288 |
| H174 | 1 | 0.0857  | 0.8574 | 0.7502  | Biso | 1       | H    | 0.13702   |   |           |
| O59  | 1 | 0.36583 |        | 0.19842 |      | 0.04806 | Biso | 1         | O | -0.596704 |
| O60  | 1 | 0.41766 |        | 0.14587 |      | 0.04844 | Biso | 1         | O | -0.551266 |
| C320 | 1 | 0.4014  | 0.1795 | 0.0623  | Biso | 1       | C    | 0.609757  |   |           |
| C321 | 1 | 0.4215  | 0.2055 | 0.1006  | Biso | 1       | C    | -0.035342 |   |           |
| C322 | 1 | 0.4046  | 0.2434 | 0.118   | Biso | 1       | C    | -0.088381 |   |           |
| H175 | 1 | 0.3792  | 0.2544 | 0.105   | Biso | 1       | H    | 0.122129  |   |           |
| C323 | 1 | 0.4235  | 0.2658 | 0.1535  | Biso | 1       | C    | -0.158819 |   |           |
| H176 | 1 | 0.4121  | 0.2921 | 0.1638  | Biso | 1       | H    | 0.126503  |   |           |
| C324 | 1 | 0.4617  | 0.2474 | 0.1746  | Biso | 1       | C    | 0.07294   |   |           |
| C325 | 1 | 0.4792  | 0.2093 | 0.1571  | Biso | 1       | C    | -0.160277 |   |           |
| H177 | 1 | 0.5046  | 0.198  | 0.17    | Biso | 1       | H    | 0.121754  |   |           |
| C326 | 1 | 0.4594  | 0.1877 | 0.1205  | Biso | 1       | C    | -0.110425 |   |           |
| H178 | 1 | 0.471   | 0.1618 | 0.1093  | Biso | 1       | H    | 0.123303  |   |           |
| C327 | 1 | 0.4835  | 0.2727 | 0.2138  | Biso | 1       | C    | 0.094621  |   |           |
| C328 | 1 | 0.4835  | 0.3161 | 0.2143  | Biso | 1       | C    | -0.215428 |   |           |
| H179 | 1 | 0.4718  | 0.3308 | 0.1892  | Biso | 1       | H    | 0.122691  |   |           |
| C329 | 1 | 0.53889 |        | 0.40942 |      | 0.25069 | Biso | 1         | C | 0.182532  |
| C330 | 1 | 0.58113 |        | 0.38737 |      | 0.2502  | Biso | 1         | C | -0.205351 |
| H180 | 1 | 0.5857  | 0.3574 | 0.2502  | Biso | 1       | H    | 0.136909  |   |           |
| O61  | 1 | 0.13417 |        | 0.30158 |      | 0.54806 | Biso | 1         | O | -0.596711 |
| O62  | 1 | 0.08234 |        | 0.35413 |      | 0.54844 | Biso | 1         | O | -0.551253 |
| C331 | 1 | 0.0986  | 0.3205 | 0.5623  | Biso | 1       | C    | 0.609769  |   |           |
| C332 | 1 | 0.0785  | 0.2945 | 0.6006  | Biso | 1       | C    | -0.035371 |   |           |
| C333 | 1 | 0.0954  | 0.2566 | 0.618   | Biso | 1       | C    | -0.088291 |   |           |
| H181 | 1 | 0.1208  | 0.2456 | 0.605   | Biso | 1       | H    | 0.1221    |   |           |
| C334 | 1 | 0.0765  | 0.2342 | 0.6535  | Biso | 1       | C    | -0.158828 |   |           |
| H182 | 1 | 0.0879  | 0.2079 | 0.6638  | Biso | 1       | H    | 0.126443  |   |           |
| C335 | 1 | 0.0383  | 0.2526 | 0.6746  | Biso | 1       | C    | 0.072904  |   |           |
| C336 | 1 | 0.0208  | 0.2907 | 0.6571  | Biso | 1       | C    | -0.160373 |   |           |
| H183 | 1 | 0.9954  | 0.302  | 0.67    | Biso | 1       | H    | 0.121862  |   |           |
| C337 | 1 | 0.0406  | 0.3123 | 0.6205  | Biso | 1       | C    | -0.110422 |   |           |
| H184 | 1 | 0.029   | 0.3382 | 0.6093  | Biso | 1       | H    | 0.1233    |   |           |
| C338 | 1 | 0.0165  | 0.2273 | 0.7138  | Biso | 1       | C    | 0.09475   |   |           |
| C339 | 1 | 0.0165  | 0.1839 | 0.7143  | Biso | 1       | C    | -0.215305 |   |           |
| H185 | 1 | 0.0282  | 0.1692 | 0.6892  | Biso | 1       | H    | 0.122811  |   |           |
| C340 | 1 | 0.96111 |        | 0.09058 |      | 0.75069 | Biso | 1         | C | 0.182386  |
| C341 | 1 | 0.91887 |        | 0.11263 |      | 0.7502  | Biso | 1         | C | -0.205515 |
| H186 | 1 | 0.9143  | 0.1426 | 0.7502  | Biso | 1       | H    | 0.13691   |   |           |
| O63  | 1 | 0.63417 |        | 0.80158 |      | 0.04806 | Biso | 1         | O | -0.596856 |
| O64  | 1 | 0.58234 |        | 0.85413 |      | 0.04844 | Biso | 1         | O | -0.551369 |
| C342 | 1 | 0.5986  | 0.8205 | 0.0623  | Biso | 1       | C    | 0.610079  |   |           |
| C343 | 1 | 0.5785  | 0.7945 | 0.1006  | Biso | 1       | C    | -0.035594 |   |           |
| C344 | 1 | 0.5954  | 0.7566 | 0.118   | Biso | 1       | C    | -0.088052 |   |           |
| H187 | 1 | 0.6208  | 0.7456 | 0.105   | Biso | 1       | H    | 0.121938  |   |           |
| C345 | 1 | 0.5765  | 0.7342 | 0.1535  | Biso | 1       | C    | -0.158894 |   |           |
| H188 | 1 | 0.5879  | 0.7079 | 0.1638  | Biso | 1       | H    | 0.126483  |   |           |
| C346 | 1 | 0.5383  | 0.7526 | 0.1746  | Biso | 1       | C    | 0.073093  |   |           |

|      |   |         |        |         |      |         |      |           |    |           |
|------|---|---------|--------|---------|------|---------|------|-----------|----|-----------|
| C347 | 1 | 0.5208  | 0.7907 | 0.1571  | Biso | 1       | C    | -0.160385 |    |           |
| H189 | 1 | 0.4954  | 0.802  | 0.17    | Biso | 1       | H    | 0.121897  |    |           |
| C348 | 1 | 0.5406  | 0.8123 | 0.1205  | Biso | 1       | C    | -0.110298 |    |           |
| H190 | 1 | 0.529   | 0.8382 | 0.1093  | Biso | 1       | H    | 0.123134  |    |           |
| C349 | 1 | 0.5165  | 0.7273 | 0.2138  | Biso | 1       | C    | 0.094666  |    |           |
| C350 | 1 | 0.5165  | 0.6839 | 0.2143  | Biso | 1       | C    | -0.215489 |    |           |
| H191 | 1 | 0.5282  | 0.6692 | 0.1892  | Biso | 1       | H    | 0.122752  |    |           |
| C351 | 1 | 0.46111 |        | 0.59058 |      | 0.25069 | Biso | 1         | C  | 0.182806  |
| C352 | 1 | 0.41887 |        | 0.61263 |      | 0.2502  | Biso | 1         | C  | -0.205741 |
| H192 | 1 | 0.4143  | 0.6426 | 0.2502  | Biso | 1       | H    | 0.136794  |    |           |
| Zn1  | 1 | 0.32512 |        | 0.17488 |      | 0       | Biso | 1         | Zn | 1.030416  |
| Zn2  | 1 | 0.3935  | 0.1065 | 0       | Biso | 1       | Zn   | 1.072536  |    |           |
| Zn3  | 1 | 0.67488 |        | 0.82512 |      | 0       | Biso | 1         | Zn | 1.030402  |
| Zn4  | 1 | 0.6065  | 0.8935 | 0       | Biso | 1       | Zn   | 1.072529  |    |           |
| Zn5  | 1 | 0.17488 |        | 0.32512 |      | 0.5     | Biso | 1         | Zn | 1.030506  |
| Zn6  | 1 | 0.1065  | 0.3935 | 0.5     | Biso | 1       | Zn   | 1.072687  |    |           |
| Zn7  | 1 | 0.82512 |        | 0.32512 |      | 0       | Biso | 1         | Zn | 1.030346  |
| Zn8  | 1 | 0.8935  | 0.3935 | 0       | Biso | 1       | Zn   | 1.07241   |    |           |
| Zn9  | 1 | 0.17488 |        | 0.67488 |      | 0       | Biso | 1         | Zn | 1.030484  |
| Zn10 | 1 | 0.1065  | 0.6065 | 0       | Biso | 1       | Zn   | 1.072592  |    |           |
| Zn11 | 1 | 0.67488 |        | 0.17488 |      | 0.5     | Biso | 1         | Zn | 1.030561  |
| Zn12 | 1 | 0.6065  | 0.1065 | 0.5     | Biso | 1       | Zn   | 1.072794  |    |           |
| Zn13 | 1 | 0.32512 |        | 0.82512 |      | 0.5     | Biso | 1         | Zn | 1.030459  |
| Zn14 | 1 | 0.3935  | 0.8935 | 0.5     | Biso | 1       | Zn   | 1.072597  |    |           |
| Zn15 | 1 | 0.82512 |        | 0.67488 |      | 0.5     | Biso | 1         | Zn | 1.030513  |
| Zn16 | 1 | 0.8935  | 0.6065 | 0.5     | Biso | 1       | Zn   | 1.072732  |    |           |
| Zn17 | 1 | 0       | 0      | 0.23781 |      |         | Biso | 1         | Zn | 0.21765   |
| Zn18 | 1 | 0.5     | 0.5    | 0.73781 |      |         | Biso | 1         | Zn | 0.210692  |
| Zn19 | 1 | 0       | 0      | 0.26219 |      |         | Biso | 1         | Zn | 0.224108  |
| Zn20 | 1 | 0.5     | 0.5    | 0.76219 |      |         | Biso | 1         | Zn | 0.229807  |
| Zn21 | 1 | 0       | 0      | 0.76219 |      |         | Biso | 1         | Zn | 0.232654  |
| Zn22 | 1 | 0.5     | 0.5    | 0.26219 |      |         | Biso | 1         | Zn | 0.225057  |
| Zn23 | 1 | 0       | 0      | 0.73781 |      |         | Biso | 1         | Zn | 0.20674   |
| Zn24 | 1 | 0.5     | 0.5    | 0.23781 |      |         | Biso | 1         | Zn | 0.215851  |
| N1   | 1 | 0.04779 |        | 0.95221 |      | 0.25    | Biso | 1         | N  | -0.317443 |
| N2   | 1 | 0.54779 |        | 0.45221 |      | 0.75    | Biso | 1         | N  | -0.316963 |
| N3   | 1 | 0.95221 |        | 0.04779 |      | 0.25    | Biso | 1         | N  | -0.317448 |
| N4   | 1 | 0.45221 |        | 0.54779 |      | 0.75    | Biso | 1         | N  | -0.316909 |
| N5   | 1 | 0.04779 |        | 0.04779 |      | 0.25    | Biso | 1         | N  | -0.317178 |
| N6   | 1 | 0.54779 |        | 0.54779 |      | 0.75    | Biso | 1         | N  | -0.31671  |
| N7   | 1 | 0.95221 |        | 0.95221 |      | 0.25    | Biso | 1         | N  | -0.317789 |
| N8   | 1 | 0.45221 |        | 0.45221 |      | 0.75    | Biso | 1         | N  | -0.316992 |
| N9   | 1 | 0.95221 |        | 0.04779 |      | 0.75    | Biso | 1         | N  | -0.316961 |
| N10  | 1 | 0.45221 |        | 0.54779 |      | 0.25    | Biso | 1         | N  | -0.317139 |
| N11  | 1 | 0.04779 |        | 0.95221 |      | 0.75    | Biso | 1         | N  | -0.316945 |
| N12  | 1 | 0.54779 |        | 0.45221 |      | 0.25    | Biso | 1         | N  | -0.317122 |
| N13  | 1 | 0.95221 |        | 0.95221 |      | 0.75    | Biso | 1         | N  | -0.317267 |
| N14  | 1 | 0.45221 |        | 0.45221 |      | 0.25    | Biso | 1         | N  | -0.317087 |
| N15  | 1 | 0.04779 |        | 0.04779 |      | 0.75    | Biso | 1         | N  | -0.316612 |
| N16  | 1 | 0.54779 |        | 0.54779 |      | 0.25    | Biso | 1         | N  | -0.316776 |
| C353 | 1 | 0.2498  | 0      | 0.25    | Biso | 1       | C    | -0.212592 |    |           |
| H193 | 1 | 0.2801  | 0      | 0.25    | Biso | 1       | H    | 0.124586  |    |           |

|      |   |        |        |      |      |   |   |           |
|------|---|--------|--------|------|------|---|---|-----------|
| C354 | 1 | 0.1601 | 0      | 0.25 | Biso | 1 | C | 0.135434  |
| C355 | 1 | 0.1133 | 0      | 0.25 | Biso | 1 | C | -0.074083 |
| C356 | 1 | 0.7498 | 0.5    | 0.75 | Biso | 1 | C | -0.212395 |
| H194 | 1 | 0.7801 | 0.5    | 0.75 | Biso | 1 | H | 0.124394  |
| C357 | 1 | 0.6601 | 0.5    | 0.75 | Biso | 1 | C | 0.135639  |
| C358 | 1 | 0.6133 | 0.5    | 0.75 | Biso | 1 | C | -0.07401  |
| C359 | 1 | 0.7502 | 0      | 0.25 | Biso | 1 | C | -0.212488 |
| H195 | 1 | 0.7199 | 0      | 0.25 | Biso | 1 | H | 0.125016  |
| C360 | 1 | 0.8399 | 0      | 0.25 | Biso | 1 | C | 0.135335  |
| C361 | 1 | 0.8867 | 0      | 0.25 | Biso | 1 | C | -0.074011 |
| C362 | 1 | 0.2502 | 0.5    | 0.75 | Biso | 1 | C | -0.213644 |
| H196 | 1 | 0.2199 | 0.5    | 0.75 | Biso | 1 | H | 0.124838  |
| C363 | 1 | 0.3399 | 0.5    | 0.75 | Biso | 1 | C | 0.135455  |
| C364 | 1 | 0.3867 | 0.5    | 0.75 | Biso | 1 | C | -0.073895 |
| C365 | 1 | 0      | 0.2498 | 0.25 | Biso | 1 | C | -0.212488 |
| H197 | 1 | 0      | 0.2801 | 0.25 | Biso | 1 | H | 0.124569  |
| C366 | 1 | 0      | 0.1601 | 0.25 | Biso | 1 | C | 0.135458  |
| C367 | 1 | 0      | 0.1133 | 0.25 | Biso | 1 | C | -0.07406  |
| C368 | 1 | 0.5    | 0.7498 | 0.75 | Biso | 1 | C | -0.212483 |
| H198 | 1 | 0.5    | 0.7801 | 0.75 | Biso | 1 | H | 0.1244    |
| C369 | 1 | 0.5    | 0.6601 | 0.75 | Biso | 1 | C | 0.135646  |
| C370 | 1 | 0.5    | 0.6133 | 0.75 | Biso | 1 | C | -0.073948 |
| C371 | 1 | 0      | 0.7502 | 0.25 | Biso | 1 | C | -0.212518 |
| H199 | 1 | 0      | 0.7199 | 0.25 | Biso | 1 | H | 0.125034  |
| C372 | 1 | 0      | 0.8399 | 0.25 | Biso | 1 | C | 0.13533   |
| C373 | 1 | 0      | 0.8867 | 0.25 | Biso | 1 | C | -0.073981 |
| C374 | 1 | 0.5    | 0.2502 | 0.75 | Biso | 1 | C | -0.213641 |
| H200 | 1 | 0.5    | 0.2199 | 0.75 | Biso | 1 | H | 0.124854  |
| C375 | 1 | 0.5    | 0.3399 | 0.75 | Biso | 1 | C | 0.135527  |
| C376 | 1 | 0.5    | 0.3867 | 0.75 | Biso | 1 | C | -0.073904 |
| C377 | 1 | 0.7502 | 0      | 0.75 | Biso | 1 | C | -0.212592 |
| H201 | 1 | 0.7199 | 0      | 0.75 | Biso | 1 | H | 0.12499   |
| C378 | 1 | 0.8399 | 0      | 0.75 | Biso | 1 | C | 0.13536   |
| C379 | 1 | 0.8867 | 0      | 0.75 | Biso | 1 | C | -0.074076 |
| C380 | 1 | 0.2502 | 0.5    | 0.25 | Biso | 1 | C | -0.212691 |
| H202 | 1 | 0.2199 | 0.5    | 0.25 | Biso | 1 | H | 0.12495   |
| C381 | 1 | 0.3399 | 0.5    | 0.25 | Biso | 1 | C | 0.135415  |
| C382 | 1 | 0.3867 | 0.5    | 0.25 | Biso | 1 | C | -0.073972 |
| C383 | 1 | 0.2498 | 0      | 0.75 | Biso | 1 | C | -0.212583 |
| H203 | 1 | 0.2801 | 0      | 0.75 | Biso | 1 | H | 0.124548  |
| C384 | 1 | 0.1601 | 0      | 0.75 | Biso | 1 | C | 0.135569  |
| C385 | 1 | 0.1133 | 0      | 0.75 | Biso | 1 | C | -0.07397  |
| C386 | 1 | 0.7498 | 0.5    | 0.25 | Biso | 1 | C | -0.212425 |
| H204 | 1 | 0.7801 | 0.5    | 0.25 | Biso | 1 | H | 0.124352  |
| C387 | 1 | 0.6601 | 0.5    | 0.25 | Biso | 1 | C | 0.13557   |
| C388 | 1 | 0.6133 | 0.5    | 0.25 | Biso | 1 | C | -0.07396  |
| C389 | 1 | 0      | 0.7502 | 0.75 | Biso | 1 | C | -0.213562 |
| H205 | 1 | 0      | 0.7199 | 0.75 | Biso | 1 | H | 0.124952  |
| C390 | 1 | 0      | 0.8399 | 0.75 | Biso | 1 | C | 0.1352    |
| C391 | 1 | 0      | 0.8867 | 0.75 | Biso | 1 | C | -0.073962 |
| C392 | 1 | 0.5    | 0.2502 | 0.25 | Biso | 1 | C | -0.212538 |
| H206 | 1 | 0.5    | 0.2199 | 0.25 | Biso | 1 | H | 0.124924  |

|      |   |     |        |      |      |   |   |           |
|------|---|-----|--------|------|------|---|---|-----------|
| C393 | 1 | 0.5 | 0.3399 | 0.25 | Biso | 1 | C | 0.135501  |
| C394 | 1 | 0.5 | 0.3867 | 0.25 | Biso | 1 | C | -0.074039 |
| C395 | 1 | 0   | 0.2498 | 0.75 | Biso | 1 | C | -0.21253  |
| H207 | 1 | 0   | 0.2801 | 0.75 | Biso | 1 | H | 0.124533  |
| C396 | 1 | 0   | 0.1601 | 0.75 | Biso | 1 | C | 0.13545   |
| C397 | 1 | 0   | 0.1133 | 0.75 | Biso | 1 | C | -0.07406  |
| C398 | 1 | 0.5 | 0.7498 | 0.25 | Biso | 1 | C | -0.212374 |
| H208 | 1 | 0.5 | 0.7801 | 0.25 | Biso | 1 | H | 0.124345  |
| C399 | 1 | 0.5 | 0.6601 | 0.25 | Biso | 1 | C | 0.135508  |
| C400 | 1 | 0.5 | 0.6133 | 0.25 | Biso | 1 | C | -0.073879 |

data\_DOMKEX\_CLEAN  
\_cell\_length\_a 6.4059  
\_cell\_length\_b 16.3502  
\_cell\_length\_c 17.8196  
\_cell\_angle\_alpha 98.109  
\_cell\_angle\_beta 94.056  
\_cell\_angle\_gamma 95.651

\_symmetry\_space\_group\_name\_H-M "P 1"  
\_symmetry\_int\_tables\_number 1

loop\_  
\_symmetry\_equiv\_pos\_as\_xyz  
'x, y, z'

loop\_  
\_atom\_site\_label  
\_atom\_site\_occupancy  
\_atom\_site\_fract\_x  
\_atom\_site\_fract\_y  
\_atom\_site\_fract\_z  
\_atom\_site\_thermal\_displace\_type  
\_atom\_site\_B\_iso\_or\_equiv  
\_atom\_site\_type\_symbol  
\_atom\_site\_charge

|     |   |         |         |         |      |   |    |           |
|-----|---|---------|---------|---------|------|---|----|-----------|
| Na1 | 1 | 0.57075 | 0.3964  | 0.51929 | Biso | 1 | Na | 0.890963  |
| Na2 | 1 | 0.87431 | 0.50879 | 0.41351 | Biso | 1 | Na | 0.895857  |
| Na3 | 1 | 0.8496  | 0.41205 | 0.72859 | Biso | 1 | Na | 0.914598  |
| Na4 | 1 | 0.2734  | 0.311   | 0.64102 | Biso | 1 | Na | 0.855225  |
| O1  | 1 | 0.2193  | 0.51455 | 0.3742  | Biso | 1 | O  | -0.755972 |
| O2  | 1 | 0.5123  | 0.46547 | 0.41404 | Biso | 1 | O  | -0.731206 |
| O3  | 1 | 0.9061  | 0.39056 | 0.46913 | Biso | 1 | O  | -0.765239 |
| O4  | 1 | 0.2011  | 0.35814 | 0.52434 | Biso | 1 | O  | -0.786792 |
| O5  | 1 | 0.1956  | 0.45561 | 0.70761 | Biso | 1 | O  | -0.787183 |
| O6  | 1 | 0.491   | 0.40385 | 0.73876 | Biso | 1 | O  | -0.725407 |
| O7  | 1 | 0.9202  | 0.2791  | 0.67965 | Biso | 1 | O  | -0.765536 |
| O8  | 1 | 0.1485  | 0.1894  | 0.6973  | Biso | 1 | O  | -0.609464 |
| O9  | 1 | 0.5782  | 0.27503 | 0.5786  | Biso | 1 | O  | -0.919031 |
| H1  | 1 | 0.6921  | 0.2798  | 0.6121  | Biso | 1 | H  | 0.441008  |
| H2  | 1 | 0.5456  | 0.2271  | 0.5466  | Biso | 1 | H  | 0.452704  |
| N1  | 1 | 0.1333  | 0.95369 | 0.90141 | Biso | 1 | N  | -0.29419  |
| H3  | 1 | 0.0757  | 0.9737  | 0.9427  | Biso | 1 | H  | 0.287252  |
| N2  | 1 | 0.2346  | 0.09506 | 0.02316 | Biso | 1 | N  | -0.4273   |
| C1  | 1 | 0.3437  | 0.45905 | 0.37258 | Biso | 1 | C  | 0.605788  |
| C2  | 1 | 0.2869  | 0.38064 | 0.31548 | Biso | 1 | C  | -0.036026 |
| C3  | 1 | 0.036   | 0.34001 | 0.47952 | Biso | 1 | C  | 0.75611   |
| C4  | 1 | 0.4249  | 0.32026 | 0.30693 | Biso | 1 | C  | -0.109341 |
| H4  | 1 | 0.5534  | 0.327   | 0.3383  | Biso | 1 | H  | 0.112712  |
| C5  | 1 | 0.0469  | 0.2984  | 0.2168  | Biso | 1 | C  | -0.150515 |
| H5  | 1 | 0.9159  | 0.2907  | 0.1868  | Biso | 1 | H  | 0.116999  |
| C6  | 1 | 0.187   | 0.2389  | 0.2064  | Biso | 1 | C  | 0.105399  |

|     |   |         |         |         |      |   |    |           |
|-----|---|---------|---------|---------|------|---|----|-----------|
| C7  | 1 | 0.2982  | 0.9952  | 0.8719  | Biso | 1 | C  | 0.202644  |
| C8  | 1 | 0.0968  | 0.3693  | 0.2709  | Biso | 1 | C  | -0.123171 |
| H6  | 1 | 0.0005  | 0.4098  | 0.2773  | Biso | 1 | H  | 0.103992  |
| C9  | 1 | 0.364   | 0.4569  | 0.7489  | Biso | 1 | C  | 0.745978  |
| C10 | 1 | 0.3895  | 0.1137  | 0.977   | Biso | 1 | C  | 0.197048  |
| C11 | 1 | 0.4181  | 0.0687  | 0.9063  | Biso | 1 | C  | -0.067686 |
| C12 | 1 | 0.0458  | 0.8877  | 0.8484  | Biso | 1 | C  | 0.190367  |
| C13 | 1 | 0.1338  | 0.1657  | 0.1451  | Biso | 1 | C  | -0.095902 |
| C14 | 1 | 0.3756  | 0.2503  | 0.2528  | Biso | 1 | C  | -0.150421 |
| H7  | 1 | 0.4713  | 0.2094  | 0.2472  | Biso | 1 | H  | 0.115193  |
| C15 | 1 | 0.165   | 0.8863  | 0.784   | Biso | 1 | C  | -0.199158 |
| H8  | 1 | 0.1415  | 0.8466  | 0.739   | Biso | 1 | H  | 0.133817  |
| C16 | 1 | 0.2643  | 0.1572  | 0.0847  | Biso | 1 | C  | 0.188488  |
| C17 | 1 | 0.5724  | 0.1077  | 0.8585  | Biso | 1 | C  | 0.088209  |
| C18 | 1 | 0.3191  | 0.9518  | 0.7977  | Biso | 1 | C  | -0.176309 |
| H9  | 1 | 0.4213  | 0.9659  | 0.7642  | Biso | 1 | H  | 0.146176  |
| C19 | 1 | 0.9803  | 0.2187  | 0.7093  | Biso | 1 | C  | 0.586405  |
| C20 | 1 | 0.8401  | 0.1799  | 0.7623  | Biso | 1 | C  | -0.037212 |
| C21 | 1 | 0.5211  | 0.1878  | 0.0109  | Biso | 1 | C  | -0.182505 |
| H10 | 1 | 0.6403  | 0.2127  | 0.9904  | Biso | 1 | H  | 0.133262  |
| C22 | 1 | 0.4444  | 0.2153  | 0.0768  | Biso | 1 | C  | -0.205807 |
| H11 | 1 | 0.498   | 0.2635  | 0.1116  | Biso | 1 | H  | 0.124199  |
| C23 | 1 | 0.9947  | 0.2535  | 0.4358  | Biso | 1 | C  | -0.632607 |
| H12 | 1 | 0.8442  | 0.2344  | 0.4333  | Biso | 1 | H  | 0.174393  |
| H13 | 1 | 0.0753  | 0.2159  | 0.4615  | Biso | 1 | H  | 0.17498   |
| H14 | 1 | 0.0379  | 0.2537  | 0.3841  | Biso | 1 | H  | 0.183864  |
| C24 | 1 | 0.4114  | 0.5267  | 0.8154  | Biso | 1 | C  | -0.637631 |
| H15 | 1 | 0.3229  | 0.5155  | 0.8562  | Biso | 1 | H  | 0.185444  |
| H16 | 1 | 0.382   | 0.5793  | 0.7987  | Biso | 1 | H  | 0.178459  |
| H17 | 1 | 0.5601  | 0.5304  | 0.8342  | Biso | 1 | H  | 0.16962   |
| C25 | 1 | 0.7637  | 0.0778  | 0.8446  | Biso | 1 | C  | -0.150793 |
| H18 | 1 | 0.8042  | 0.0323  | 0.8678  | Biso | 1 | H  | 0.105292  |
| C26 | 1 | 0.8959  | 0.1137  | 0.7971  | Biso | 1 | C  | -0.109871 |
| H19 | 1 | 0.0264  | 0.0926  | 0.7883  | Biso | 1 | H  | 0.109466  |
| C27 | 1 | 0.6516  | 0.2113  | 0.7779  | Biso | 1 | C  | -0.117216 |
| H20 | 1 | 0.613   | 0.2582  | 0.7564  | Biso | 1 | H  | 0.095359  |
| C28 | 1 | 0.5202  | 0.1745  | 0.8247  | Biso | 1 | C  | -0.135413 |
| H21 | 1 | 0.3901  | 0.1959  | 0.8338  | Biso | 1 | H  | 0.117537  |
| Na5 | 1 | 0.42925 | 0.6036  | 0.48071 | Biso | 1 | Na | 0.890947  |
| Na6 | 1 | 0.12569 | 0.49121 | 0.58649 | Biso | 1 | Na | 0.895841  |
| Na7 | 1 | 0.1504  | 0.58795 | 0.27141 | Biso | 1 | Na | 0.914605  |
| Na8 | 1 | 0.7266  | 0.689   | 0.35898 | Biso | 1 | Na | 0.855235  |
| O10 | 1 | 0.7807  | 0.48545 | 0.6258  | Biso | 1 | O  | -0.75574  |
| O11 | 1 | 0.4877  | 0.53453 | 0.58596 | Biso | 1 | O  | -0.731189 |
| O12 | 1 | 0.0939  | 0.60944 | 0.53087 | Biso | 1 | O  | -0.765014 |
| O13 | 1 | 0.7989  | 0.64186 | 0.47566 | Biso | 1 | O  | -0.786728 |
| O14 | 1 | 0.8044  | 0.54439 | 0.29239 | Biso | 1 | O  | -0.787083 |
| O15 | 1 | 0.509   | 0.59615 | 0.26124 | Biso | 1 | O  | -0.725709 |
| O16 | 1 | 0.0798  | 0.7209  | 0.32035 | Biso | 1 | O  | -0.765306 |
| O17 | 1 | 0.8515  | 0.8106  | 0.3027  | Biso | 1 | O  | -0.609598 |
| O18 | 1 | 0.4218  | 0.72497 | 0.4214  | Biso | 1 | O  | -0.918946 |
| H22 | 1 | 0.3079  | 0.7202  | 0.3879  | Biso | 1 | H  | 0.441009  |

|     |   |        |         |         |      |   |   |           |           |
|-----|---|--------|---------|---------|------|---|---|-----------|-----------|
| H23 | 1 | 0.4544 | 0.7729  | 0.4534  | Biso | 1 | H | 0.452562  |           |
| N3  | 1 | 0.8667 | 0.04631 | 0.09859 | Biso | 1 | N |           | -0.294056 |
| H24 | 1 | 0.9243 | 0.0263  | 0.0573  | Biso | 1 | H | 0.28729   |           |
| N4  | 1 | 0.7654 | 0.90494 | 0.97684 | Biso | 1 | N |           | -0.427488 |
| C29 | 1 | 0.6563 | 0.54095 | 0.62742 | Biso | 1 | C |           | 0.605752  |
| C30 | 1 | 0.7131 | 0.61936 | 0.68452 | Biso | 1 | C |           | -0.036003 |
| C31 | 1 | 0.964  | 0.65999 | 0.52048 | Biso | 1 | C |           | 0.755953  |
| C32 | 1 | 0.5751 | 0.67974 | 0.69307 | Biso | 1 | C |           | -0.109371 |
| H25 | 1 | 0.4466 | 0.673   | 0.6617  | Biso | 1 | H | 0.112715  |           |
| C33 | 1 | 0.9531 | 0.7016  | 0.7832  | Biso | 1 | C | -0.150406 |           |
| H26 | 1 | 0.0841 | 0.7093  | 0.8132  | Biso | 1 | H | 0.117029  |           |
| C34 | 1 | 0.813  | 0.7611  | 0.7936  | Biso | 1 | C | 0.105284  |           |
| C35 | 1 | 0.7018 | 0.0048  | 0.1281  | Biso | 1 | C | 0.202516  |           |
| C36 | 1 | 0.9032 | 0.6307  | 0.7291  | Biso | 1 | C | -0.123206 |           |
| H27 | 1 | 0.9995 | 0.5902  | 0.7227  | Biso | 1 | H | 0.104156  |           |
| C37 | 1 | 0.636  | 0.5431  | 0.2511  | Biso | 1 | C | 0.745951  |           |
| C38 | 1 | 0.6105 | 0.8863  | 0.023   | Biso | 1 | C | 0.197103  |           |
| C39 | 1 | 0.5819 | 0.9313  | 0.0937  | Biso | 1 | C | -0.067684 |           |
| C40 | 1 | 0.9542 | 0.1123  | 0.1516  | Biso | 1 | C | 0.190345  |           |
| C41 | 1 | 0.8662 | 0.8343  | 0.8549  | Biso | 1 | C | -0.095843 |           |
| C42 | 1 | 0.6244 | 0.7497  | 0.7472  | Biso | 1 | C | -0.150304 |           |
| H28 | 1 | 0.5287 | 0.7906  | 0.7528  | Biso | 1 | H | 0.114926  |           |
| C43 | 1 | 0.835  | 0.1137  | 0.216   | Biso | 1 | C | -0.199083 |           |
| H29 | 1 | 0.8585 | 0.1534  | 0.261   | Biso | 1 | H | 0.133622  |           |
| C44 | 1 | 0.7357 | 0.8428  | 0.9153  | Biso | 1 | C | 0.188493  |           |
| C45 | 1 | 0.4276 | 0.8923  | 0.1415  | Biso | 1 | C | 0.088275  |           |
| C46 | 1 | 0.6809 | 0.0482  | 0.2023  | Biso | 1 | C | -0.176242 |           |
| H30 | 1 | 0.5787 | 0.0341  | 0.2358  | Biso | 1 | H | 0.146172  |           |
| C47 | 1 | 0.0197 | 0.7813  | 0.2907  | Biso | 1 | C | 0.586255  |           |
| C48 | 1 | 0.1599 | 0.8201  | 0.2377  | Biso | 1 | C | -0.037201 |           |
| C49 | 1 | 0.4789 | 0.8122  | 0.9891  | Biso | 1 | C | -0.18253  |           |
| H31 | 1 | 0.3597 | 0.7873  | 0.0096  | Biso | 1 | H | 0.133319  |           |
| C50 | 1 | 0.5556 | 0.7847  | 0.9232  | Biso | 1 | C | -0.205772 |           |
| H32 | 1 | 0.502  | 0.7365  | 0.8884  | Biso | 1 | H | 0.12432   |           |
| C51 | 1 | 0.0053 | 0.7465  | 0.5642  | Biso | 1 | C | -0.632735 |           |
| H33 | 1 | 0.1558 | 0.7656  | 0.5667  | Biso | 1 | H | 0.174492  |           |
| H34 | 1 | 0.9247 | 0.7841  | 0.5385  | Biso | 1 | H | 0.174875  |           |
| H35 | 1 | 0.9621 | 0.7463  | 0.6159  | Biso | 1 | H | 0.183805  |           |
| C52 | 1 | 0.5886 | 0.4733  | 0.1846  | Biso | 1 | C | -0.637451 |           |
| H36 | 1 | 0.6771 | 0.4845  | 0.1438  | Biso | 1 | H | 0.185483  |           |
| H37 | 1 | 0.618  | 0.4207  | 0.2013  | Biso | 1 | H | 0.178539  |           |
| H38 | 1 | 0.4399 | 0.4696  | 0.1658  | Biso | 1 | H | 0.169586  |           |
| C53 | 1 | 0.2363 | 0.9222  | 0.1554  | Biso | 1 | C | -0.150944 |           |
| H39 | 1 | 0.1958 | 0.9677  | 0.1322  | Biso | 1 | H | 0.105214  |           |
| C54 | 1 | 0.1041 | 0.8863  | 0.2029  | Biso | 1 | C | -0.109931 |           |
| H40 | 1 | 0.9736 | 0.9074  | 0.2117  | Biso | 1 | H | 0.10938   |           |
| C55 | 1 | 0.3484 | 0.7887  | 0.2221  | Biso | 1 | C | -0.116969 |           |
| H41 | 1 | 0.387  | 0.7418  | 0.2436  | Biso | 1 | H | 0.095412  |           |
| C56 | 1 | 0.4798 | 0.8255  | 0.1753  | Biso | 1 | C | -0.135489 |           |
| H42 | 1 | 0.6099 | 0.8041  | 0.1662  | Biso | 1 | H | 0.117657  |           |

```

data_DUBWON_clean
_audit_creation_date 2014-07-02
_audit_creation_method 'Materials Studio'
_symmetry_space_group_name_H-M 'P1'
_symmetry_Int_Tables_number 1
_symmetry_cell_setting triclinic
loop_
_symmetry_equiv_pos_as_xyz
    x,y,z
_cell_length_a 9.119
_cell_length_b 14.4711
_cell_length_c 14.7355
_cell_angle_alpha 90
_cell_angle_beta 90
_cell_angle_gamma 107.752
loop_
_atom_site_label
_atom_site_type_symbol
_atom_site_fract_x
_atom_site_fract_y
_atom_site_fract_z
_atom_site_U_iso_or_equiv
_atom_site_adp_type
_atom_site_occupancy
_atom_site_charge
Zn1 Zn 0.27724 0.36437 0.34906 0.01267 Uiso 1 1.008904
Zn2 Zn 0.18311 0.13419 0.25261 0.01267 Uiso 1 0.979919
Zn3 Zn 0.22276 0.13563 0.84906 0.01267 Uiso 1 1.008588
Zn4 Zn 0.31689 0.36581 0.75261 0.01267 Uiso 1 0.979618
Zn5 Zn 0.72276 0.63563 0.65094 0.01267 Uiso 1 1.008876
Zn6 Zn 0.81689 0.86581 0.74739 0.01267 Uiso 1 0.979869
Zn7 Zn 0.77724 0.86437 0.15094 0.01267 Uiso 1 1.008506
Zn8 Zn 0.68311 0.63419 0.24739 0.01267 Uiso 1 0.97963
H1 H 0.8581 0.3945 0.298 0.01267 Uiso 1 0.126534
H2 H 0.7013 0.1024 0.2779 0.01267 Uiso 1 0.124682
H3 H 0.4505 0.1067 0.2861 0.01267 Uiso 1 0.131976
H4 H 0.2611 0.4107 0.5533 0.01267 Uiso 1 0.011622
H5 H 0.6419 0.1055 0.798 0.01267 Uiso 1 0.126299
H6 H 0.7987 0.3976 0.7779 0.01267 Uiso 1 0.124581
H7 H 0.0495 0.3933 0.7861 0.01267 Uiso 1 0.130905
H8 H 0.2389 0.0893 0.0533 0.01267 Uiso 1 0.01148
H9 H 0.1419 0.6055 0.702 0.01267 Uiso 1 0.126737
H10 H 0.2987 0.8976 0.7221 0.01267 Uiso 1 0.124619
H11 H 0.5495 0.8933 0.7139 0.01267 Uiso 1 0.131801
H12 H 0.7389 0.5893 0.4467 0.01267 Uiso 1 0.01164
H13 H 0.3581 0.8945 0.202 0.01267 Uiso 1 0.126222
H14 H 0.2013 0.6024 0.2221 0.01267 Uiso 1 0.124702
H15 H 0.9505 0.6067 0.2139 0.01267 Uiso 1 0.131268
H16 H 0.7611 0.9107 0.9467 0.01267 Uiso 1 0.011453
C1 C 0.4978 0.2546 0.2954 0.01267 Uiso 1 0.357903
C2 C 0.6243 0.3416 0.2985 0.01267 Uiso 1 -0.192768

```

|     |   |        |         |         |         |      |   |           |
|-----|---|--------|---------|---------|---------|------|---|-----------|
| C3  | C | 0.7746 | 0.3361  | 0.2952  | 0.01267 | Uiso | 1 | -0.088737 |
| C4  | C | 0.806  | 0.2484  | 0.2879  | 0.01267 | Uiso | 1 | -0.081198 |
| C5  | C | 0.6822 | 0.163   | 0.2837  | 0.01267 | Uiso | 1 | -0.048244 |
| C6  | C | 0.5325 | 0.1658  | 0.288   | 0.01267 | Uiso | 1 | -0.247222 |
| C7  | C | 0.6063 | 0.4413  | 0.3012  | 0.01267 | Uiso | 1 | 0.614837  |
| C8  | C | 0.9675 | 0.2449  | 0.2844  | 0.01267 | Uiso | 1 | 0.628803  |
| C9  | C | 0.2782 | 0.3493  | 0.5499  | 0.01267 | Uiso | 1 | 0.504272  |
| C10 | C | 0.0022 | 0.2454  | 0.7954  | 0.01267 | Uiso | 1 | 0.357719  |
| C11 | C | 0.8757 | 0.1584  | 0.7985  | 0.01267 | Uiso | 1 | -0.194891 |
| C12 | C | 0.7254 | 0.1639  | 0.7952  | 0.01267 | Uiso | 1 | -0.088299 |
| C13 | C | 0.694  | 0.2516  | 0.7879  | 0.01267 | Uiso | 1 | -0.080294 |
| C14 | C | 0.8178 | 0.337   | 0.7837  | 0.01267 | Uiso | 1 | -0.048147 |
| C15 | C | 0.9675 | 0.3342  | 0.788   | 0.01267 | Uiso | 1 | -0.245868 |
| C16 | C | 0.8937 | 0.0587  | 0.8012  | 0.01267 | Uiso | 1 | 0.616516  |
| C17 | C | 0.5325 | 0.2551  | 0.7844  | 0.01267 | Uiso | 1 | 0.627156  |
| C18 | C | 0.2218 | 0.1507  | 0.0499  | 0.01267 | Uiso | 1 | 0.50407   |
| C19 | C | 0.5022 | 0.7454  | 0.7046  | 0.01267 | Uiso | 1 | 0.35816   |
| C20 | C | 0.3757 | 0.6584  | 0.7015  | 0.01267 | Uiso | 1 | -0.192939 |
| C21 | C | 0.2254 | 0.6639  | 0.7048  | 0.01267 | Uiso | 1 | -0.088616 |
| C22 | C | 0.194  | 0.7516  | 0.7121  | 0.01267 | Uiso | 1 | -0.081358 |
| C23 | C | 0.3178 | 0.837   | 0.7163  | 0.01267 | Uiso | 1 | -0.048067 |
| C24 | C | 0.4675 | 0.8342  | 0.712   | 0.01267 | Uiso | 1 | -0.247468 |
| C25 | C | 0.3937 | 0.5587  | 0.6988  | 0.01267 | Uiso | 1 | 0.614946  |
| C26 | C | 0.0325 | 0.7551  | 0.7156  | 0.01267 | Uiso | 1 | 0.628816  |
| C27 | C | 0.7218 | 0.6507  | 0.4501  | 0.01267 | Uiso | 1 | 0.504465  |
| C28 | C | 0.9978 | 0.7546  | 0.2046  | 0.01267 | Uiso | 1 | 0.357633  |
| C29 | C | 0.1243 | 0.8416  | 0.2015  | 0.01267 | Uiso | 1 | -0.194816 |
| C30 | C | 0.2746 | 0.8361  | 0.2048  | 0.01267 | Uiso | 1 | -0.08859  |
| C31 | C | 0.306  | 0.7484  | 0.2121  | 0.01267 | Uiso | 1 | -0.080028 |
| C32 | C | 0.1822 | 0.663   | 0.2163  | 0.01267 | Uiso | 1 | -0.048338 |
| C33 | C | 0.0325 | 0.6658  | 0.212   | 0.01267 | Uiso | 1 | -0.245979 |
| C34 | C | 0.1063 | 0.9413  | 0.1988  | 0.01267 | Uiso | 1 | 0.616559  |
| C35 | C | 0.4675 | 0.7449  | 0.2156  | 0.01267 | Uiso | 1 | 0.627032  |
| C36 | C | 0.7782 | 0.8493  | 0.9501  | 0.01267 | Uiso | 1 | 0.50404   |
| O1  | O | 0.3518 | 0.25264 | 0.29676 | 0.01267 | Uiso | 1 | -0.569429 |
| O2  | O | 0.4761 | 0.45465 | 0.30958 | 0.01267 | Uiso | 1 | -0.576306 |
| O3  | O | 0.7262 | 0.51226 | 0.2935  | 0.01267 | Uiso | 1 | -0.531957 |
| O4  | O | 0.0743 | 0.32437 | 0.2909  | 0.01267 | Uiso | 1 | -0.578796 |
| O5  | O | 0.9875 | 0.16245 | 0.276   | 0.01267 | Uiso | 1 | -0.553649 |
| O6  | O | 0.2804 | 0.3126  | 0.473   | 0.01267 | Uiso | 1 | -0.52543  |
| O7  | O | 0.2971 | 0.3096  | 0.622   | 0.01267 | Uiso | 1 | -0.49554  |
| O8  | O | 0.1482 | 0.24736 | 0.79676 | 0.01267 | Uiso | 1 | -0.568844 |
| O9  | O | 0.0239 | 0.04535 | 0.80958 | 0.01267 | Uiso | 1 | -0.576554 |
| O10 | O | 0.7738 | 0.98774 | 0.7935  | 0.01267 | Uiso | 1 | -0.532704 |
| O11 | O | 0.4257 | 0.17563 | 0.7909  | 0.01267 | Uiso | 1 | -0.577934 |
| O12 | O | 0.5125 | 0.33755 | 0.776   | 0.01267 | Uiso | 1 | -0.552978 |
| O13 | O | 0.2196 | 0.1874  | 0.973   | 0.01267 | Uiso | 1 | -0.525433 |
| O14 | O | 0.2029 | 0.1904  | 0.122   | 0.01267 | Uiso | 1 | -0.49513  |
| O15 | O | 0.6482 | 0.74736 | 0.70324 | 0.01267 | Uiso | 1 | -0.569622 |
| O16 | O | 0.5239 | 0.54535 | 0.69042 | 0.01267 | Uiso | 1 | -0.576417 |
| O17 | O | 0.2738 | 0.48774 | 0.7065  | 0.01267 | Uiso | 1 | -0.531775 |
| O18 | O | 0.9257 | 0.67563 | 0.7091  | 0.01267 | Uiso | 1 | -0.578519 |

|     |   |        |         |         |         |      |   |           |
|-----|---|--------|---------|---------|---------|------|---|-----------|
| O19 | O | 0.0125 | 0.83755 | 0.724   | 0.01267 | Uiso | 1 | -0.553852 |
| O20 | O | 0.7196 | 0.6874  | 0.527   | 0.01267 | Uiso | 1 | -0.525452 |
| O21 | O | 0.7029 | 0.6904  | 0.378   | 0.01267 | Uiso | 1 | -0.495772 |
| O22 | O | 0.8518 | 0.75264 | 0.20324 | 0.01267 | Uiso | 1 | -0.56873  |
| O23 | O | 0.9761 | 0.95465 | 0.19042 | 0.01267 | Uiso | 1 | -0.576451 |
| O24 | O | 0.2262 | 0.01226 | 0.2065  | 0.01267 | Uiso | 1 | -0.532943 |
| O25 | O | 0.5743 | 0.82437 | 0.2091  | 0.01267 | Uiso | 1 | -0.578087 |
| O26 | O | 0.4875 | 0.66245 | 0.224   | 0.01267 | Uiso | 1 | -0.55278  |
| O27 | O | 0.7804 | 0.8126  | 0.027   | 0.01267 | Uiso | 1 | -0.525298 |
| O28 | O | 0.7971 | 0.8096  | 0.878   | 0.01267 | Uiso | 1 | -0.495114 |

```

data_EZOFEF_clean
_audit_creation_date      2014-07-02
_audit_creation_method    'Materials Studio'
_symmetry_space_group_name_H-M  'P1'
_symmetry_Int_Tables_number  1
_symmetry_cell_setting    triclinic
loop_
_symmetry_equiv_pos_as_xyz
  x,y,z
_cell_length_a            18.8049
_cell_length_b            18.8049
_cell_length_c            18.8049
_cell_angle_alpha        60.0000
_cell_angle_beta         60.0000
_cell_angle_gamma        60.0000
loop_
_atom_site_label
_atom_site_type_symbol
_atom_site_fract_x
_atom_site_fract_y
_atom_site_fract_z
_atom_site_U_iso_or_equiv
_atom_site_adp_type
_atom_site_occupancy
_atom_site_charge
Ni1  Ni    0.92786    0.5    0.07214    0.01267    Uiso  1    0.827572
Ni2  Ni    0.5    0.92786    0.5    0.01267    Uiso  1    0.887054
Ni3  Ni    0.07214    0.5    0.92786    0.01267    Uiso  1    0.777325
Ni4  Ni    0.5    0.07214    0.5    0.01267    Uiso  1    0.88676
Ni5  Ni    0.92786    0.07214    0.5    0.01267    Uiso  1    0.749269
Ni6  Ni    0.5    0.5    0.07214    0.01267    Uiso  1    0.748493
Ni7  Ni    0.07214    0.92786    0.5    0.01267    Uiso  1    0.74954
Ni8  Ni    0.5    0.5    0.92786    0.01267    Uiso  1    0.7505519999999997
Ni9  Ni    0.92786    0.5    0.5    0.01267    Uiso  1    0.886939
Ni10 Ni    0.5    0.07214    0.92786    0.01267    Uiso  1    0.748862
Ni11 Ni    0.07214    0.5    0.5    0.01267    Uiso  1    0.887252
Ni12 Ni    0.5    0.92786    0.07214    0.01267    Uiso  1    0.748757
H1   H     0.7388 0.5242 0.1298 0.01267    Uiso  1    0.164247
H2   H     0.5242 0.7388 0.6072 0.01267    Uiso  1    0.168422
H3   H     0.1298 0.6072 0.7388 0.01267    Uiso  1    0.162365
H4   H     0.6072 0.1298 0.5242 0.01267    Uiso  1    0.16694
H5   H     0.7388 0.1298 0.6072 0.01267    Uiso  1    0.161487
H6   H     0.5242 0.6072 0.1298 0.01267    Uiso  1    0.161754
H7   H     0.1298 0.7388 0.5242 0.01267    Uiso  1    0.161095
H8   H     0.6072 0.5242 0.7388 0.01267    Uiso  1    0.162317
H9   H     0.7388 0.6072 0.5242 0.01267    Uiso  1    0.166331
H10  H     0.5242 0.1298 0.7388 0.01267    Uiso  1    0.160022
H11  H     0.1298 0.5242 0.6072 0.01267    Uiso  1    0.166565
H12  H     0.6072 0.7388 0.1298 0.01267    Uiso  1    0.161069
H13  H     0.4758 0.2612 0.8702 0.01267    Uiso  1    0.161266
H14  H     0.2612 0.4758 0.3928 0.01267    Uiso  1    0.1685

```

|     |   |        |        |        |         |      |   |          |
|-----|---|--------|--------|--------|---------|------|---|----------|
| H15 | H | 0.3928 | 0.8702 | 0.2612 | 0.01267 | Uiso | 1 | 0.166935 |
| H16 | H | 0.8702 | 0.3928 | 0.4758 | 0.01267 | Uiso | 1 | 0.167022 |
| H17 | H | 0.8702 | 0.2612 | 0.3928 | 0.01267 | Uiso | 1 | 0.161325 |
| H18 | H | 0.3928 | 0.4758 | 0.8702 | 0.01267 | Uiso | 1 | 0.161601 |
| H19 | H | 0.2612 | 0.8702 | 0.4758 | 0.01267 | Uiso | 1 | 0.160983 |
| H20 | H | 0.4758 | 0.3928 | 0.2612 | 0.01267 | Uiso | 1 | 0.162394 |
| H21 | H | 0.3928 | 0.2612 | 0.4758 | 0.01267 | Uiso | 1 | 0.166286 |
| H22 | H | 0.8702 | 0.4758 | 0.2612 | 0.01267 | Uiso | 1 | 0.163327 |
| H23 | H | 0.4758 | 0.8702 | 0.3928 | 0.01267 | Uiso | 1 | 0.166817 |
| H24 | H | 0.2612 | 0.3928 | 0.8702 | 0.01267 | Uiso | 1 | 0.162165 |
| H25 | H | 0.2612 | 0.4758 | 0.8702 | 0.01267 | Uiso | 1 | 0.16162  |
| H26 | H | 0.4758 | 0.2612 | 0.3928 | 0.01267 | Uiso | 1 | 0.166793 |
| H27 | H | 0.8702 | 0.3928 | 0.2612 | 0.01267 | Uiso | 1 | 0.169451 |
| H28 | H | 0.3928 | 0.8702 | 0.4758 | 0.01267 | Uiso | 1 | 0.167223 |
| H29 | H | 0.2612 | 0.8702 | 0.3928 | 0.01267 | Uiso | 1 | 0.161589 |
| H30 | H | 0.4758 | 0.3928 | 0.8702 | 0.01267 | Uiso | 1 | 0.161626 |
| H31 | H | 0.8702 | 0.2612 | 0.4758 | 0.01267 | Uiso | 1 | 0.161051 |
| H32 | H | 0.3928 | 0.4758 | 0.2612 | 0.01267 | Uiso | 1 | 0.162632 |
| H33 | H | 0.2612 | 0.3928 | 0.4758 | 0.01267 | Uiso | 1 | 0.167801 |
| H34 | H | 0.4758 | 0.8702 | 0.2612 | 0.01267 | Uiso | 1 | 0.160326 |
| H35 | H | 0.8702 | 0.4758 | 0.3928 | 0.01267 | Uiso | 1 | 0.166679 |
| H36 | H | 0.3928 | 0.2612 | 0.8702 | 0.01267 | Uiso | 1 | 0.161306 |
| H37 | H | 0.5242 | 0.7388 | 0.1298 | 0.01267 | Uiso | 1 | 0.161385 |
| H38 | H | 0.7388 | 0.5242 | 0.6072 | 0.01267 | Uiso | 1 | 0.168574 |
| H39 | H | 0.6072 | 0.1298 | 0.7388 | 0.01267 | Uiso | 1 | 0.171913 |
| H40 | H | 0.1298 | 0.6072 | 0.5242 | 0.01267 | Uiso | 1 | 0.167267 |
| H41 | H | 0.1298 | 0.7388 | 0.6072 | 0.01267 | Uiso | 1 | 0.161463 |
| H42 | H | 0.6072 | 0.5242 | 0.1298 | 0.01267 | Uiso | 1 | 0.161506 |
| H43 | H | 0.7388 | 0.1298 | 0.5242 | 0.01267 | Uiso | 1 | 0.160964 |
| H44 | H | 0.5242 | 0.6072 | 0.7388 | 0.01267 | Uiso | 1 | 0.162788 |
| H45 | H | 0.6072 | 0.7388 | 0.5242 | 0.01267 | Uiso | 1 | 0.167783 |
| H46 | H | 0.1298 | 0.5242 | 0.7388 | 0.01267 | Uiso | 1 | 0.161147 |
| H47 | H | 0.5242 | 0.1298 | 0.6072 | 0.01267 | Uiso | 1 | 0.166799 |
| H48 | H | 0.7388 | 0.6072 | 0.1298 | 0.01267 | Uiso | 1 | 0.164243 |
| H49 | H | 0.776  | 0.5    | 0.224  | 0.01267 | Uiso | 1 | 0.418955 |
| H50 | H | 0.5    | 0.776  | 0.5    | 0.01267 | Uiso | 1 | 0.423129 |
| H51 | H | 0.224  | 0.5    | 0.776  | 0.01267 | Uiso | 1 | 0.414689 |
| H52 | H | 0.5    | 0.224  | 0.5    | 0.01267 | Uiso | 1 | 0.423225 |
| H53 | H | 0.776  | 0.224  | 0.5    | 0.01267 | Uiso | 1 | 0.413664 |
| H54 | H | 0.5    | 0.5    | 0.224  | 0.01267 | Uiso | 1 | 0.413458 |
| H55 | H | 0.224  | 0.776  | 0.5    | 0.01267 | Uiso | 1 | 0.413173 |
| H56 | H | 0.5    | 0.5    | 0.776  | 0.01267 | Uiso | 1 | 0.413731 |
| H57 | H | 0.776  | 0.5    | 0.5    | 0.01267 | Uiso | 1 | 0.423175 |
| H58 | H | 0.5    | 0.224  | 0.776  | 0.01267 | Uiso | 1 | 0.413877 |
| H59 | H | 0.224  | 0.5    | 0.5    | 0.01267 | Uiso | 1 | 0.422918 |
| H60 | H | 0.5    | 0.776  | 0.224  | 0.01267 | Uiso | 1 | 0.413342 |
| H61 | H | 0.0142 | 0.2268 | 0.2268 | 0.01267 | Uiso | 1 | 0.126876 |
| H62 | H | 0.2268 | 0.0142 | 0.5322 | 0.01267 | Uiso | 1 | 0.125577 |
| H63 | H | 0.2268 | 0.5322 | 0.0142 | 0.01267 | Uiso | 1 | 0.126168 |
| H64 | H | 0.5322 | 0.2268 | 0.2268 | 0.01267 | Uiso | 1 | 0.125817 |
| H65 | H | 0.0142 | 0.2268 | 0.5322 | 0.01267 | Uiso | 1 | 0.125688 |
| H66 | H | 0.2268 | 0.5322 | 0.2268 | 0.01267 | Uiso | 1 | 0.12572  |

|      |   |         |         |         |         |         |         |          |           |           |
|------|---|---------|---------|---------|---------|---------|---------|----------|-----------|-----------|
| H67  | H | 0.2268  | 0.0142  | 0.2268  | 0.01267 | Uiso    | 1       | 0.126974 |           |           |
| H68  | H | 0.5322  | 0.2268  | 0.0142  | 0.01267 | Uiso    | 1       | 0.126681 |           |           |
| H69  | H | 0.0142  | 0.5322  | 0.2268  | 0.01267 | Uiso    | 1       | 0.12594  |           |           |
| H70  | H | 0.2268  | 0.2268  | 0.0142  | 0.01267 | Uiso    | 1       | 0.126892 |           |           |
| H71  | H | 0.2268  | 0.2268  | 0.5322  | 0.01267 | Uiso    | 1       | 0.124867 |           |           |
| H72  | H | 0.5322  | 0.0142  | 0.2268  | 0.01267 | Uiso    | 1       | 0.126108 |           |           |
| H73  | H | 0.7732  | 0.9858  | 0.7732  | 0.01267 | Uiso    | 1       | 0.127247 |           |           |
| H74  | H | 0.9858  | 0.7732  | 0.4678  | 0.01267 | Uiso    | 1       | 0.125507 |           |           |
| H75  | H | 0.4678  | 0.7732  | 0.9858  | 0.01267 | Uiso    | 1       | 0.126448 |           |           |
| H76  | H | 0.7732  | 0.4678  | 0.7732  | 0.01267 | Uiso    | 1       | 0.125849 |           |           |
| H77  | H | 0.7732  | 0.9858  | 0.4678  | 0.01267 | Uiso    | 1       | 0.125754 |           |           |
| H78  | H | 0.4678  | 0.7732  | 0.7732  | 0.01267 | Uiso    | 1       | 0.125728 |           |           |
| H79  | H | 0.9858  | 0.7732  | 0.7732  | 0.01267 | Uiso    | 1       | 0.126573 |           |           |
| H80  | H | 0.7732  | 0.4678  | 0.9858  | 0.01267 | Uiso    | 1       | 0.126437 |           |           |
| H81  | H | 0.4678  | 0.9858  | 0.7732  | 0.01267 | Uiso    | 1       | 0.126216 |           |           |
| H82  | H | 0.7732  | 0.7732  | 0.9858  | 0.01267 | Uiso    | 1       | 0.12689  |           |           |
| H83  | H | 0.7732  | 0.7732  | 0.4678  | 0.01267 | Uiso    | 1       | 0.124895 |           |           |
| H84  | H | 0.9858  | 0.4678  | 0.7732  | 0.01267 | Uiso    | 1       | 0.125596 |           |           |
| H85  | H | 0.6963  | 0.543   | 0.2177  | 0.01267 | Uiso    | 1       | 0.118402 |           |           |
| H86  | H | 0.543   | 0.6963  | 0.543   | 0.01267 | Uiso    | 1       | 0.121757 |           |           |
| H87  | H | 0.2177  | 0.543   | 0.6963  | 0.01267 | Uiso    | 1       | 0.115679 |           |           |
| H88  | H | 0.543   | 0.2177  | 0.543   | 0.01267 | Uiso    | 1       | 0.122319 |           |           |
| H89  | H | 0.6963  | 0.2177  | 0.543   | 0.01267 | Uiso    | 1       | 0.11446  |           |           |
| H90  | H | 0.543   | 0.543   | 0.2177  | 0.01267 | Uiso    | 1       | 0.114036 |           |           |
| H91  | H | 0.2177  | 0.6963  | 0.543   | 0.01267 | Uiso    | 1       | 0.113985 |           |           |
| H92  | H | 0.543   | 0.543   | 0.6963  | 0.01267 | Uiso    | 1       | 0.113521 |           |           |
| H93  | H | 0.6963  | 0.543   | 0.543   | 0.01267 | Uiso    | 1       | 0.121901 |           |           |
| H94  | H | 0.543   | 0.2177  | 0.6963  | 0.01267 | Uiso    | 1       | 0.113745 |           |           |
| H95  | H | 0.2177  | 0.543   | 0.543   | 0.01267 | Uiso    | 1       | 0.122061 |           |           |
| H96  | H | 0.543   | 0.6963  | 0.2177  | 0.01267 | Uiso    | 1       | 0.114253 |           |           |
| H97  | H | 0.457   | 0.3037  | 0.7823  | 0.01267 | Uiso    | 1       | 0.114625 |           |           |
| H98  | H | 0.3037  | 0.457   | 0.457   | 0.01267 | Uiso    | 1       | 0.121681 |           |           |
| H99  | H | 0.457   | 0.7823  | 0.3037  | 0.01267 | Uiso    | 1       | 0.113742 |           |           |
| H100 | H | 0.7823  | 0.457   | 0.457   | 0.01267 | Uiso    | 1       | 0.122056 |           |           |
| H101 | H | 0.7823  | 0.3037  | 0.457   | 0.01267 | Uiso    | 1       | 0.114224 |           |           |
| H102 | H | 0.457   | 0.457   | 0.7823  | 0.01267 | Uiso    | 1       | 0.114363 |           |           |
| H103 | H | 0.3037  | 0.7823  | 0.457   | 0.01267 | Uiso    | 1       | 0.1141   |           |           |
| H104 | H | 0.457   | 0.457   | 0.3037  | 0.01267 | Uiso    | 1       | 0.113314 |           |           |
| H105 | H | 0.457   | 0.3037  | 0.457   | 0.01267 | Uiso    | 1       | 0.122003 |           |           |
| H106 | H | 0.7823  | 0.457   | 0.3037  | 0.01267 | Uiso    | 1       | 0.117696 |           |           |
| H107 | H | 0.457   | 0.7823  | 0.457   | 0.01267 | Uiso    | 1       | 0.122178 |           |           |
| H108 | H | 0.3037  | 0.457   | 0.7823  | 0.01267 | Uiso    | 1       | 0.116129 |           |           |
| C1   | C | 0.0694  | 0.33476 |         | 0.0694  | 0.01267 | Uiso    | 1        | 0.583615  |           |
| C2   | C | 0.1136  | 0.24194 |         | 0.1136  | 0.01267 | Uiso    | 1        | -0.010026 |           |
| C3   | C | 0.33476 |         | 0.0694  | 0.52644 |         | 0.01267 | Uiso     | 1         | 0.591091  |
| C4   | C | 0.24194 |         | 0.1136  | 0.53086 |         | 0.01267 | Uiso     | 1         | -0.012266 |
| C5   | C | 0.0694  | 0.52644 |         | 0.0694  | 0.01267 | Uiso    | 1        | 0.583965  |           |
| C6   | C | 0.1136  | 0.53086 |         | 0.1136  | 0.01267 | Uiso    | 1        | -0.012381 |           |
| C7   | C | 0.52644 |         | 0.0694  | 0.33476 |         | 0.01267 | Uiso     | 1         | 0.590849  |
| C8   | C | 0.53086 |         | 0.1136  | 0.24194 |         | 0.01267 | Uiso     | 1         | -0.010941 |
| C9   | C | 0.0694  | 0.0694  | 0.52644 |         | 0.01267 | Uiso    | 1        | 0.580261  |           |
| C10  | C | 0.1136  | 0.1136  | 0.53086 |         | 0.01267 | Uiso    | 1        | -0.011623 |           |

|     |   |         |         |         |         |      |   |           |
|-----|---|---------|---------|---------|---------|------|---|-----------|
| C11 | C | 0.33476 | 0.52644 | 0.0694  | 0.01267 | Uiso | 1 | 0.579358  |
| C12 | C | 0.24194 | 0.53086 | 0.1136  | 0.01267 | Uiso | 1 | -0.01007  |
| C13 | C | 0.0694  | 0.0694  | 0.33476 | 0.01267 | Uiso | 1 | 0.579478  |
| C14 | C | 0.1136  | 0.1136  | 0.24194 | 0.01267 | Uiso | 1 | -0.009346 |
| C15 | C | 0.52644 | 0.33476 | 0.0694  | 0.01267 | Uiso | 1 | 0.579615  |
| C16 | C | 0.53086 | 0.24194 | 0.1136  | 0.01267 | Uiso | 1 | -0.010064 |
| C17 | C | 0.0694  | 0.52644 | 0.33476 | 0.01267 | Uiso | 1 | 0.591178  |
| C18 | C | 0.1136  | 0.53086 | 0.24194 | 0.01267 | Uiso | 1 | -0.011731 |
| C19 | C | 0.33476 | 0.0694  | 0.0694  | 0.01267 | Uiso | 1 | 0.579002  |
| C20 | C | 0.24194 | 0.1136  | 0.1136  | 0.01267 | Uiso | 1 | -0.009143 |
| C21 | C | 0.0694  | 0.33476 | 0.52644 | 0.01267 | Uiso | 1 | 0.591316  |
| C22 | C | 0.1136  | 0.24194 | 0.53086 | 0.01267 | Uiso | 1 | -0.012572 |
| C23 | C | 0.52644 | 0.0694  | 0.0694  | 0.01267 | Uiso | 1 | 0.579145  |
| C24 | C | 0.53086 | 0.1136  | 0.1136  | 0.01267 | Uiso | 1 | -0.009891 |
| C25 | C | 0.66524 | 0.9306  | 0.9306  | 0.01267 | Uiso | 1 | 0.579116  |
| C26 | C | 0.75806 | 0.8864  | 0.8864  | 0.01267 | Uiso | 1 | -0.009465 |
| C27 | C | 0.9306  | 0.66524 | 0.47356 | 0.01267 | Uiso | 1 | 0.591118  |
| C28 | C | 0.8864  | 0.75806 | 0.46914 | 0.01267 | Uiso | 1 | -0.012338 |
| C29 | C | 0.47356 | 0.9306  | 0.9306  | 0.01267 | Uiso | 1 | 0.579402  |
| C30 | C | 0.46914 | 0.8864  | 0.8864  | 0.01267 | Uiso | 1 | -0.010357 |
| C31 | C | 0.9306  | 0.47356 | 0.66524 | 0.01267 | Uiso | 1 | 0.590927  |
| C32 | C | 0.8864  | 0.46914 | 0.75806 | 0.01267 | Uiso | 1 | -0.011156 |
| C33 | C | 0.9306  | 0.9306  | 0.47356 | 0.01267 | Uiso | 1 | 0.580174  |
| C34 | C | 0.8864  | 0.8864  | 0.46914 | 0.01267 | Uiso | 1 | -0.011558 |
| C35 | C | 0.47356 | 0.66524 | 0.9306  | 0.01267 | Uiso | 1 | 0.579593  |
| C36 | C | 0.46914 | 0.75806 | 0.8864  | 0.01267 | Uiso | 1 | -0.010267 |
| C37 | C | 0.9306  | 0.9306  | 0.66524 | 0.01267 | Uiso | 1 | 0.579414  |
| C38 | C | 0.8864  | 0.8864  | 0.75806 | 0.01267 | Uiso | 1 | -0.009228 |
| C39 | C | 0.66524 | 0.47356 | 0.9306  | 0.01267 | Uiso | 1 | 0.579717  |
| C40 | C | 0.75806 | 0.46914 | 0.8864  | 0.01267 | Uiso | 1 | -0.010758 |
| C41 | C | 0.47356 | 0.9306  | 0.66524 | 0.01267 | Uiso | 1 | 0.590821  |
| C42 | C | 0.46914 | 0.8864  | 0.75806 | 0.01267 | Uiso | 1 | -0.011141 |
| C43 | C | 0.9306  | 0.66524 | 0.9306  | 0.01267 | Uiso | 1 | 0.583559  |
| C44 | C | 0.8864  | 0.75806 | 0.8864  | 0.01267 | Uiso | 1 | -0.010007 |
| C45 | C | 0.66524 | 0.9306  | 0.47356 | 0.01267 | Uiso | 1 | 0.591096  |
| C46 | C | 0.75806 | 0.8864  | 0.46914 | 0.01267 | Uiso | 1 | -0.012513 |
| C47 | C | 0.9306  | 0.47356 | 0.9306  | 0.01267 | Uiso | 1 | 0.583833  |
| C48 | C | 0.8864  | 0.46914 | 0.8864  | 0.01267 | Uiso | 1 | -0.012029 |
| C49 | C | 0.07154 | 0.1985  | 0.1985  | 0.01267 | Uiso | 1 | -0.119587 |
| C50 | C | 0.1985  | 0.07154 | 0.53146 | 0.01267 | Uiso | 1 | -0.121225 |
| C51 | C | 0.1985  | 0.53146 | 0.07154 | 0.01267 | Uiso | 1 | -0.123116 |
| C52 | C | 0.53146 | 0.1985  | 0.1985  | 0.01267 | Uiso | 1 | -0.119778 |
| C53 | C | 0.07154 | 0.1985  | 0.53146 | 0.01267 | Uiso | 1 | -0.121105 |
| C54 | C | 0.1985  | 0.53146 | 0.1985  | 0.01267 | Uiso | 1 | -0.119513 |
| C55 | C | 0.1985  | 0.07154 | 0.1985  | 0.01267 | Uiso | 1 | -0.121043 |
| C56 | C | 0.53146 | 0.1985  | 0.07154 | 0.01267 | Uiso | 1 | -0.121424 |
| C57 | C | 0.07154 | 0.53146 | 0.1985  | 0.01267 | Uiso | 1 | -0.117355 |
| C58 | C | 0.1985  | 0.1985  | 0.07154 | 0.01267 | Uiso | 1 | -0.121144 |
| C59 | C | 0.1985  | 0.1985  | 0.53146 | 0.01267 | Uiso | 1 | -0.119158 |
| C60 | C | 0.53146 | 0.07154 | 0.1985  | 0.01267 | Uiso | 1 | -0.119761 |
| C61 | C | 0.8015  | 0.92846 | 0.8015  | 0.01267 | Uiso | 1 | -0.120835 |
| C62 | C | 0.92846 | 0.8015  | 0.46854 | 0.01267 | Uiso | 1 | -0.121288 |

|     |   |         |         |         |         |      |   |           |
|-----|---|---------|---------|---------|---------|------|---|-----------|
| C63 | C | 0.46854 | 0.8015  | 0.92846 | 0.01267 | Uiso | 1 | -0.121579 |
| C64 | C | 0.8015  | 0.46854 | 0.8015  | 0.01267 | Uiso | 1 | -0.119724 |
| C65 | C | 0.8015  | 0.92846 | 0.46854 | 0.01267 | Uiso | 1 | -0.12108  |
| C66 | C | 0.46854 | 0.8015  | 0.8015  | 0.01267 | Uiso | 1 | -0.118955 |
| C67 | C | 0.92846 | 0.8015  | 0.8015  | 0.01267 | Uiso | 1 | -0.121113 |
| C68 | C | 0.8015  | 0.46854 | 0.92846 | 0.01267 | Uiso | 1 | -0.119199 |
| C69 | C | 0.46854 | 0.92846 | 0.8015  | 0.01267 | Uiso | 1 | -0.119422 |
| C70 | C | 0.8015  | 0.8015  | 0.92846 | 0.01267 | Uiso | 1 | -0.119497 |
| C71 | C | 0.8015  | 0.8015  | 0.46854 | 0.01267 | Uiso | 1 | -0.118975 |
| C72 | C | 0.92846 | 0.46854 | 0.8015  | 0.01267 | Uiso | 1 | -0.121405 |
| C73 | C | 0.743   | 0.547   | 0.163   | 0.01267 | Uiso | 1 | -0.332464 |
| C74 | C | 0.547   | 0.743   | 0.547   | 0.01267 | Uiso | 1 | -0.338811 |
| C75 | C | 0.163   | 0.547   | 0.743   | 0.01267 | Uiso | 1 | -0.331604 |
| C76 | C | 0.547   | 0.163   | 0.547   | 0.01267 | Uiso | 1 | -0.334537 |
| C77 | C | 0.743   | 0.163   | 0.547   | 0.01267 | Uiso | 1 | -0.331415 |
| C78 | C | 0.547   | 0.547   | 0.163   | 0.01267 | Uiso | 1 | -0.330583 |
| C79 | C | 0.163   | 0.743   | 0.547   | 0.01267 | Uiso | 1 | -0.331405 |
| C80 | C | 0.547   | 0.547   | 0.743   | 0.01267 | Uiso | 1 | -0.335397 |
| C81 | C | 0.743   | 0.547   | 0.547   | 0.01267 | Uiso | 1 | -0.336297 |
| C82 | C | 0.547   | 0.163   | 0.743   | 0.01267 | Uiso | 1 | -0.339837 |
| C83 | C | 0.163   | 0.547   | 0.547   | 0.01267 | Uiso | 1 | -0.334025 |
| C84 | C | 0.547   | 0.743   | 0.163   | 0.01267 | Uiso | 1 | -0.331096 |
| C85 | C | 0.453   | 0.257   | 0.837   | 0.01267 | Uiso | 1 | -0.330707 |
| C86 | C | 0.257   | 0.453   | 0.453   | 0.01267 | Uiso | 1 | -0.338587 |
| C87 | C | 0.453   | 0.837   | 0.257   | 0.01267 | Uiso | 1 | -0.334853 |
| C88 | C | 0.837   | 0.453   | 0.453   | 0.01267 | Uiso | 1 | -0.334408 |
| C89 | C | 0.837   | 0.257   | 0.453   | 0.01267 | Uiso | 1 | -0.331516 |
| C90 | C | 0.453   | 0.453   | 0.837   | 0.01267 | Uiso | 1 | -0.330492 |
| C91 | C | 0.257   | 0.837   | 0.453   | 0.01267 | Uiso | 1 | -0.331369 |
| C92 | C | 0.453   | 0.453   | 0.257   | 0.01267 | Uiso | 1 | -0.335246 |
| C93 | C | 0.453   | 0.257   | 0.453   | 0.01267 | Uiso | 1 | -0.334248 |
| C94 | C | 0.837   | 0.453   | 0.257   | 0.01267 | Uiso | 1 | -0.336549 |
| C95 | C | 0.453   | 0.837   | 0.453   | 0.01267 | Uiso | 1 | -0.333942 |
| C96 | C | 0.257   | 0.453   | 0.837   | 0.01267 | Uiso | 1 | -0.331574 |
| N1  | N | 0.823   | 0.5     | 0.177   | 0.01267 | Uiso | 1 | -0.477963 |
| N2  | N | 0.5     | 0.823   | 0.5     | 0.01267 | Uiso | 1 | -0.475647 |
| N3  | N | 0.177   | 0.5     | 0.823   | 0.01267 | Uiso | 1 | -0.480675 |
| N4  | N | 0.5     | 0.177   | 0.5     | 0.01267 | Uiso | 1 | -0.475682 |
| N5  | N | 0.823   | 0.177   | 0.5     | 0.01267 | Uiso | 1 | -0.477059 |
| N6  | N | 0.5     | 0.5     | 0.177   | 0.01267 | Uiso | 1 | -0.477358 |
| N7  | N | 0.177   | 0.823   | 0.5     | 0.01267 | Uiso | 1 | -0.4765   |
| N8  | N | 0.5     | 0.5     | 0.823   | 0.01267 | Uiso | 1 | -0.477352 |
| N9  | N | 0.823   | 0.5     | 0.5     | 0.01267 | Uiso | 1 | -0.475504 |
| N10 | N | 0.5     | 0.177   | 0.823   | 0.01267 | Uiso | 1 | -0.47912  |
| N11 | N | 0.177   | 0.5     | 0.5     | 0.01267 | Uiso | 1 | -0.475381 |
| N12 | N | 0.5     | 0.823   | 0.177   | 0.01267 | Uiso | 1 | -0.477899 |
| O1  | O | 0.99401 | 0.37205 | 0.11249 | 0.01267 | Uiso | 1 | -0.540409 |
| O2  | O | 0.37205 | 0.99401 | 0.52145 | 0.01267 | Uiso | 1 | -0.558108 |
| O3  | O | 0.11249 | 0.52145 | 0.99401 | 0.01267 | Uiso | 1 | -0.50616  |
| O4  | O | 0.52145 | 0.11249 | 0.37205 | 0.01267 | Uiso | 1 | -0.557682 |
| O5  | O | 0.99401 | 0.11249 | 0.52145 | 0.01267 | Uiso | 1 | -0.514491 |
| O6  | O | 0.37205 | 0.52145 | 0.11249 | 0.01267 | Uiso | 1 | -0.515848 |

|     |   |         |         |         |         |      |   |           |
|-----|---|---------|---------|---------|---------|------|---|-----------|
| O7  | O | 0.11249 | 0.99401 | 0.37205 | 0.01267 | Uiso | 1 | -0.514403 |
| O8  | O | 0.52145 | 0.37205 | 0.99401 | 0.01267 | Uiso | 1 | -0.517092 |
| O9  | O | 0.99401 | 0.52145 | 0.37205 | 0.01267 | Uiso | 1 | -0.557448 |
| O10 | O | 0.37205 | 0.11249 | 0.99401 | 0.01267 | Uiso | 1 | -0.514241 |
| O11 | O | 0.11249 | 0.37205 | 0.52145 | 0.01267 | Uiso | 1 | -0.558558 |
| O12 | O | 0.52145 | 0.99401 | 0.11249 | 0.01267 | Uiso | 1 | -0.514527 |
| O13 | O | 0.62795 | 0.00599 | 0.88751 | 0.01267 | Uiso | 1 | -0.514712 |
| O14 | O | 0.00599 | 0.62795 | 0.47855 | 0.01267 | Uiso | 1 | -0.557812 |
| O15 | O | 0.47855 | 0.88751 | 0.00599 | 0.01267 | Uiso | 1 | -0.51413  |
| O16 | O | 0.88751 | 0.47855 | 0.62795 | 0.01267 | Uiso | 1 | -0.557723 |
| O17 | O | 0.88751 | 0.00599 | 0.47855 | 0.01267 | Uiso | 1 | -0.514271 |
| O18 | O | 0.47855 | 0.62795 | 0.88751 | 0.01267 | Uiso | 1 | -0.517094 |
| O19 | O | 0.00599 | 0.88751 | 0.62795 | 0.01267 | Uiso | 1 | -0.514663 |
| O20 | O | 0.62795 | 0.47855 | 0.00599 | 0.01267 | Uiso | 1 | -0.515995 |
| O21 | O | 0.47855 | 0.00599 | 0.62795 | 0.01267 | Uiso | 1 | -0.557195 |
| O22 | O | 0.88751 | 0.62795 | 0.00599 | 0.01267 | Uiso | 1 | -0.539997 |
| O23 | O | 0.62795 | 0.88751 | 0.47855 | 0.01267 | Uiso | 1 | -0.558657 |
| O24 | O | 0.00599 | 0.47855 | 0.88751 | 0.01267 | Uiso | 1 | -0.506685 |
| O25 | O | 0.00599 | 0.62795 | 0.88751 | 0.01267 | Uiso | 1 | -0.523982 |
| O26 | O | 0.62795 | 0.00599 | 0.47855 | 0.01267 | Uiso | 1 | -0.556961 |
| O27 | O | 0.88751 | 0.47855 | 0.00599 | 0.01267 | Uiso | 1 | -0.546819 |
| O28 | O | 0.47855 | 0.88751 | 0.62795 | 0.01267 | Uiso | 1 | -0.557201 |
| O29 | O | 0.00599 | 0.88751 | 0.47855 | 0.01267 | Uiso | 1 | -0.514602 |
| O30 | O | 0.62795 | 0.47855 | 0.88751 | 0.01267 | Uiso | 1 | -0.513262 |
| O31 | O | 0.88751 | 0.00599 | 0.62795 | 0.01267 | Uiso | 1 | -0.513916 |
| O32 | O | 0.47855 | 0.62795 | 0.00599 | 0.01267 | Uiso | 1 | -0.511574 |
| O33 | O | 0.00599 | 0.47855 | 0.62795 | 0.01267 | Uiso | 1 | -0.557566 |
| O34 | O | 0.62795 | 0.88751 | 0.00599 | 0.01267 | Uiso | 1 | -0.514026 |
| O35 | O | 0.88751 | 0.62795 | 0.47855 | 0.01267 | Uiso | 1 | -0.55802  |
| O36 | O | 0.47855 | 0.00599 | 0.88751 | 0.01267 | Uiso | 1 | -0.513485 |
| O37 | O | 0.37205 | 0.99401 | 0.11249 | 0.01267 | Uiso | 1 | -0.514196 |
| O38 | O | 0.99401 | 0.37205 | 0.52145 | 0.01267 | Uiso | 1 | -0.55764  |
| O39 | O | 0.52145 | 0.11249 | 0.99401 | 0.01267 | Uiso | 1 | -0.512838 |
| O40 | O | 0.11249 | 0.52145 | 0.37205 | 0.01267 | Uiso | 1 | -0.557766 |
| O41 | O | 0.11249 | 0.99401 | 0.52145 | 0.01267 | Uiso | 1 | -0.515026 |
| O42 | O | 0.52145 | 0.37205 | 0.11249 | 0.01267 | Uiso | 1 | -0.511691 |
| O43 | O | 0.99401 | 0.11249 | 0.37205 | 0.01267 | Uiso | 1 | -0.514236 |
| O44 | O | 0.37205 | 0.52145 | 0.99401 | 0.01267 | Uiso | 1 | -0.512922 |
| O45 | O | 0.52145 | 0.99401 | 0.37205 | 0.01267 | Uiso | 1 | -0.556972 |
| O46 | O | 0.11249 | 0.37205 | 0.99401 | 0.01267 | Uiso | 1 | -0.524167 |
| O47 | O | 0.37205 | 0.11249 | 0.52145 | 0.01267 | Uiso | 1 | -0.557877 |
| O48 | O | 0.99401 | 0.52145 | 0.11249 | 0.01267 | Uiso | 1 | -0.547296 |

```

data_QOHTUD_clean
_audit_creation_date      2014-07-02
_audit_creation_method    'Materials Studio'
_symmetry_space_group_name_H-M  'P1'
_symmetry_Int_Tables_number  1
_symmetry_cell_setting    triclinic
loop_
_symmetry_equiv_pos_as_xyz
  x,y,z
_cell_length_a            9.4044
_cell_length_b            13.1257
_cell_length_c            19.8899
_cell_angle_alpha         109.2660
_cell_angle_beta          102.4660
_cell_angle_gamma         90.0000
loop_
_atom_site_label
_atom_site_type_symbol
_atom_site_fract_x
_atom_site_fract_y
_atom_site_fract_z
_atom_site_U_iso_or_equiv
_atom_site_adp_type
_atom_site_occupancy
_atom_site_charge
Co1  Co   0.17572    0.1429 0.72502    0.01267    Uiso  1    0.70791
Co2  Co   0.32428    0.41788  0.27498    0.01267    Uiso  1    0.705697
Co3  Co   0.82428    0.8571 0.27498    0.01267    Uiso  1    0.707728
Co4  Co   0.67572    0.58212  0.72502    0.01267    Uiso  1    0.705725
H1   H    0.8593 0.1754 0.7424 0.01267    Uiso  1    0.096291
H2   H    0.6235 0.1322 0.6758 0.01267    Uiso  1    0.145626
H3   H    0.7798 0.9795 0.4978 0.01267    Uiso  1    0.131894
H4   H    0.0103 0.0268 0.5696 0.01267    Uiso  1    0.09818
H5   H    0.1504 0.2303 0.887  0.01267    Uiso  1    0.109011
H6   H    0.0876 0.1739 0.9746 0.01267    Uiso  1    0.138697
H7   H    0.0213 0.8723 0.8318 0.01267    Uiso  1    0.145605
H8   H    0.0786 0.9373 0.7468 0.01267    Uiso  1    0.108589
H9   H    0.4468 0.0437 0.5618 0.01267    Uiso  1    0.120499
H10  H    0.9809 0.8969 0.9508 0.01267    Uiso  1    0.119432
H11  H    0.4415 0.3097 0.5816 0.01267    Uiso  1    0.135834
H12  H    0.1606 0.212  0.5208 0.01267    Uiso  1    0.105552
H13  H    0.0598 0.2122 0.3946 0.01267    Uiso  1    0.136268
H14  H    0.3459 0.2978 0.453  0.01267    Uiso  1    0.103679
H15  H    0.6407 0.433  0.2576 0.01267    Uiso  1    0.096104
H16  H    0.8765 0.4564 0.3242 0.01267    Uiso  1    0.144728
H17  H    0.7202 0.4817 0.5022 0.01267    Uiso  1    0.13108
H18  H    0.4897 0.4572 0.4304 0.01267    Uiso  1    0.098892
H19  H    0.3496 0.3433 0.113  0.01267    Uiso  1    0.104155
H20  H    0.4124 0.1993 0.0254 0.01267    Uiso  1    0.125697
H21  H    0.4787 0.0405 0.1682 0.01267    Uiso  1    0.145349
H22  H    0.4214 0.1905 0.2532 0.01267    Uiso  1    0.108811

```

|     |   |        |         |         |         |         |      |          |           |
|-----|---|--------|---------|---------|---------|---------|------|----------|-----------|
| H23 | H | 0.0532 | 0.4819  | 0.4382  | 0.01267 | Uiso    | 1    | 0.120206 |           |
| H24 | H | 0.5191 | 0.9461  | 0.0492  | 0.01267 | Uiso    | 1    | 0.119952 |           |
| H25 | H | 0.0585 | 0.7281  | 0.4184  | 0.01267 | Uiso    | 1    | 0.136549 |           |
| H26 | H | 0.3394 | 0.6912  | 0.4792  | 0.01267 | Uiso    | 1    | 0.105162 |           |
| H27 | H | 0.4402 | 0.8176  | 0.6054  | 0.01267 | Uiso    | 1    | 0.135666 |           |
| H28 | H | 0.1541 | 0.8448  | 0.547   | 0.01267 | Uiso    | 1    | 0.103049 |           |
| H29 | H | 0.1407 | 0.8246  | 0.2576  | 0.01267 | Uiso    | 1    | 0.096351 |           |
| H30 | H | 0.3765 | 0.8678  | 0.3242  | 0.01267 | Uiso    | 1    | 0.145685 |           |
| H31 | H | 0.2202 | 0.0205  | 0.5022  | 0.01267 | Uiso    | 1    | 0.131854 |           |
| H32 | H | 0.9897 | 0.9732  | 0.4304  | 0.01267 | Uiso    | 1    | 0.0981   |           |
| H33 | H | 0.8496 | 0.7697  | 0.113   | 0.01267 | Uiso    | 1    | 0.109195 |           |
| H34 | H | 0.9124 | 0.8261  | 0.0254  | 0.01267 | Uiso    | 1    | 0.138767 |           |
| H35 | H | 0.9787 | 0.1277  | 0.1682  | 0.01267 | Uiso    | 1    | 0.145425 |           |
| H36 | H | 0.9214 | 0.0627  | 0.2532  | 0.01267 | Uiso    | 1    | 0.108541 |           |
| H37 | H | 0.5532 | 0.9563  | 0.4382  | 0.01267 | Uiso    | 1    | 0.12069  |           |
| H38 | H | 0.0191 | 0.1031  | 0.0492  | 0.01267 | Uiso    | 1    | 0.119245 |           |
| H39 | H | 0.5585 | 0.6903  | 0.4184  | 0.01267 | Uiso    | 1    | 0.135805 |           |
| H40 | H | 0.8394 | 0.788   | 0.4792  | 0.01267 | Uiso    | 1    | 0.10542  |           |
| H41 | H | 0.9402 | 0.7878  | 0.6054  | 0.01267 | Uiso    | 1    | 0.136265 |           |
| H42 | H | 0.6541 | 0.7022  | 0.547   | 0.01267 | Uiso    | 1    | 0.103685 |           |
| H43 | H | 0.3593 | 0.567   | 0.7424  | 0.01267 | Uiso    | 1    | 0.096223 |           |
| H44 | H | 0.1235 | 0.5436  | 0.6758  | 0.01267 | Uiso    | 1    | 0.144697 |           |
| H45 | H | 0.2798 | 0.5183  | 0.4978  | 0.01267 | Uiso    | 1    | 0.131048 |           |
| H46 | H | 0.5103 | 0.5428  | 0.5696  | 0.01267 | Uiso    | 1    | 0.098986 |           |
| H47 | H | 0.6504 | 0.6567  | 0.887   | 0.01267 | Uiso    | 1    | 0.104262 |           |
| H48 | H | 0.5876 | 0.8007  | 0.9746  | 0.01267 | Uiso    | 1    | 0.12569  |           |
| H49 | H | 0.5213 | 0.9595  | 0.8318  | 0.01267 | Uiso    | 1    | 0.145045 |           |
| H50 | H | 0.5786 | 0.8095  | 0.7468  | 0.01267 | Uiso    | 1    | 0.108705 |           |
| H51 | H | 0.9468 | 0.5181  | 0.5618  | 0.01267 | Uiso    | 1    | 0.120048 |           |
| H52 | H | 0.4809 | 0.0539  | 0.9508  | 0.01267 | Uiso    | 1    | 0.119798 |           |
| H53 | H | 0.9415 | 0.2719  | 0.5816  | 0.01267 | Uiso    | 1    | 0.136655 |           |
| H54 | H | 0.6606 | 0.3088  | 0.5208  | 0.01267 | Uiso    | 1    | 0.104966 |           |
| H55 | H | 0.5598 | 0.1824  | 0.3946  | 0.01267 | Uiso    | 1    | 0.135572 |           |
| H56 | H | 0.8459 | 0.1552  | 0.453   | 0.01267 | Uiso    | 1    | 0.103261 |           |
| C1  | C | 0.8424 | 0.13534 |         | 0.69228 | 0.01267 | Uiso | 1        | 0.071521  |
| C2  | C | 0.7008 | 0.10973 |         | 0.65266 | 0.01267 | Uiso | 1        | -0.159152 |
| C3  | C | 0.6712 | 0.0504  | 0.57814 |         | 0.01267 | Uiso | 1        | 0.163615  |
| C4  | C | 0.7931 | 0.01966 |         | 0.54772 | 0.01267 | Uiso | 1        | -0.18829  |
| C5  | C | 0.9306 | 0.04846 |         | 0.59112 | 0.01267 | Uiso | 1        | 0.082967  |
| C6  | C | 0.1226 | 0.15651 |         | 0.87522 | 0.01267 | Uiso | 1        | 0.043812  |
| C7  | C | 0.0857 | 0.12323 |         | 0.92826 | 0.01267 | Uiso | 1        | -0.212931 |
| C8  | C | 0.0459 | 0.01562 |         | 0.91364 | 0.01267 | Uiso | 1        | 0.155004  |
| C9  | C | 0.046  | 0.94665 |         | 0.8445  | 0.01267 | Uiso | 1        | -0.170522 |
| C10 | C | 0.0819 | 0.98616 |         | 0.79392 | 0.01267 | Uiso | 1        | 0.114812  |
| C11 | C | 0.5208 | 0.02434 |         | 0.53588 | 0.01267 | Uiso | 1        | -0.1255   |
| C12 | C | 0.0041 | 0.97208 |         | 0.96656 | 0.01267 | Uiso | 1        | -0.13834  |
| C13 | C | 0.3392 | 0.25281 |         | 0.64806 | 0.01267 | Uiso | 1        | 0.610968  |
| C14 | C | 0.3538 | 0.27492 |         | 0.58112 | 0.01267 | Uiso | 1        | -0.237772 |
| C15 | C | 0.2473 | 0.24738 |         | 0.52052 | 0.01267 | Uiso | 1        | -0.060481 |
| C16 | C | 0.1565 | 0.28292 |         | 0.33284 | 0.01267 | Uiso | 1        | 0.608749  |
| C17 | C | 0.1468 | 0.24897 |         | 0.39614 | 0.01267 | Uiso | 1        | -0.243313 |
| C18 | C | 0.2562 | 0.26828 |         | 0.4546  | 0.01267 | Uiso | 1        | -0.051063 |

|     |   |        |         |         |         |      |   |           |
|-----|---|--------|---------|---------|---------|------|---|-----------|
| C19 | C | 0.6576 | 0.44306 | 0.30772 | 0.01267 | Uiso | 1 | 0.070431  |
| C20 | C | 0.7992 | 0.45707 | 0.34734 | 0.01267 | Uiso | 1 | -0.157889 |
| C21 | C | 0.8288 | 0.47226 | 0.42186 | 0.01267 | Uiso | 1 | 0.164072  |
| C22 | C | 0.7069 | 0.47194 | 0.45228 | 0.01267 | Uiso | 1 | -0.187834 |
| C23 | C | 0.5694 | 0.45734 | 0.40888 | 0.01267 | Uiso | 1 | 0.081883  |
| C24 | C | 0.3774 | 0.28129 | 0.12478 | 0.01267 | Uiso | 1 | 0.04822   |
| C25 | C | 0.4143 | 0.19497 | 0.07174 | 0.01267 | Uiso | 1 | -0.199917 |
| C26 | C | 0.4541 | 0.10198 | 0.08636 | 0.01267 | Uiso | 1 | 0.155511  |
| C27 | C | 0.454  | 0.10215 | 0.1555  | 0.01267 | Uiso | 1 | -0.171594 |
| C28 | C | 0.4181 | 0.19224 | 0.20608 | 0.01267 | Uiso | 1 | 0.114226  |
| C29 | C | 0.9792 | 0.48846 | 0.46412 | 0.01267 | Uiso | 1 | -0.125442 |
| C30 | C | 0.4959 | 0.00552 | 0.03344 | 0.01267 | Uiso | 1 | -0.138069 |
| C31 | C | 0.1608 | 0.60475 | 0.35194 | 0.01267 | Uiso | 1 | 0.61088   |
| C32 | C | 0.1462 | 0.6938  | 0.41888 | 0.01267 | Uiso | 1 | -0.238471 |
| C33 | C | 0.2527 | 0.72686 | 0.47948 | 0.01267 | Uiso | 1 | -0.060946 |
| C34 | C | 0.3435 | 0.95008 | 0.66716 | 0.01267 | Uiso | 1 | 0.608383  |
| C35 | C | 0.3532 | 0.85283 | 0.60386 | 0.01267 | Uiso | 1 | -0.242053 |
| C36 | C | 0.2438 | 0.81368 | 0.5454  | 0.01267 | Uiso | 1 | -0.049981 |
| C37 | C | 0.1576 | 0.86466 | 0.30772 | 0.01267 | Uiso | 1 | 0.071355  |
| C38 | C | 0.2992 | 0.89027 | 0.34734 | 0.01267 | Uiso | 1 | -0.158945 |
| C39 | C | 0.3288 | 0.9496  | 0.42186 | 0.01267 | Uiso | 1 | 0.163463  |
| C40 | C | 0.2069 | 0.98034 | 0.45228 | 0.01267 | Uiso | 1 | -0.188168 |
| C41 | C | 0.0694 | 0.95154 | 0.40888 | 0.01267 | Uiso | 1 | 0.083002  |
| C42 | C | 0.8774 | 0.84349 | 0.12478 | 0.01267 | Uiso | 1 | 0.043746  |
| C43 | C | 0.9143 | 0.87677 | 0.07174 | 0.01267 | Uiso | 1 | -0.212831 |
| C44 | C | 0.9541 | 0.98438 | 0.08636 | 0.01267 | Uiso | 1 | 0.154811  |
| C45 | C | 0.954  | 0.05335 | 0.1555  | 0.01267 | Uiso | 1 | -0.170576 |
| C46 | C | 0.9181 | 0.01384 | 0.20608 | 0.01267 | Uiso | 1 | 0.114811  |
| C47 | C | 0.4792 | 0.97566 | 0.46412 | 0.01267 | Uiso | 1 | -0.125588 |
| C48 | C | 0.9959 | 0.02792 | 0.03344 | 0.01267 | Uiso | 1 | -0.138167 |
| C49 | C | 0.6608 | 0.74719 | 0.35194 | 0.01267 | Uiso | 1 | 0.611015  |
| C50 | C | 0.6462 | 0.72508 | 0.41888 | 0.01267 | Uiso | 1 | -0.237788 |
| C51 | C | 0.7527 | 0.75262 | 0.47948 | 0.01267 | Uiso | 1 | -0.060217 |
| C52 | C | 0.8435 | 0.71708 | 0.66716 | 0.01267 | Uiso | 1 | 0.608622  |
| C53 | C | 0.8532 | 0.75103 | 0.60386 | 0.01267 | Uiso | 1 | -0.243211 |
| C54 | C | 0.7438 | 0.73172 | 0.5454  | 0.01267 | Uiso | 1 | -0.051216 |
| C55 | C | 0.3424 | 0.55694 | 0.69228 | 0.01267 | Uiso | 1 | 0.070341  |
| C56 | C | 0.2008 | 0.54293 | 0.65266 | 0.01267 | Uiso | 1 | -0.157918 |
| C57 | C | 0.1712 | 0.52774 | 0.57814 | 0.01267 | Uiso | 1 | 0.164075  |
| C58 | C | 0.2931 | 0.52806 | 0.54772 | 0.01267 | Uiso | 1 | -0.1879   |
| C59 | C | 0.4306 | 0.54266 | 0.59112 | 0.01267 | Uiso | 1 | 0.081931  |
| C60 | C | 0.6226 | 0.71871 | 0.87522 | 0.01267 | Uiso | 1 | 0.048472  |
| C61 | C | 0.5857 | 0.80503 | 0.92826 | 0.01267 | Uiso | 1 | -0.199734 |
| C62 | C | 0.5459 | 0.89802 | 0.91364 | 0.01267 | Uiso | 1 | 0.155286  |
| C63 | C | 0.546  | 0.89785 | 0.8445  | 0.01267 | Uiso | 1 | -0.171352 |
| C64 | C | 0.5819 | 0.80776 | 0.79392 | 0.01267 | Uiso | 1 | 0.113977  |
| C65 | C | 0.0208 | 0.51154 | 0.53588 | 0.01267 | Uiso | 1 | -0.125125 |
| C66 | C | 0.5041 | 0.99448 | 0.96656 | 0.01267 | Uiso | 1 | -0.138094 |
| C67 | C | 0.8392 | 0.39525 | 0.64806 | 0.01267 | Uiso | 1 | 0.610831  |
| C68 | C | 0.8538 | 0.3062  | 0.58112 | 0.01267 | Uiso | 1 | -0.238305 |
| C69 | C | 0.7473 | 0.27314 | 0.52052 | 0.01267 | Uiso | 1 | -0.060921 |
| C70 | C | 0.6565 | 0.04992 | 0.33284 | 0.01267 | Uiso | 1 | 0.608372  |

|     |   |        |         |         |         |      |   |           |
|-----|---|--------|---------|---------|---------|------|---|-----------|
| C71 | C | 0.6468 | 0.14717 | 0.39614 | 0.01267 | Uiso | 1 | -0.242092 |
| C72 | C | 0.7562 | 0.18632 | 0.4546  | 0.01267 | Uiso | 1 | -0.050105 |
| N1  | N | 0.9582 | 0.10592 | 0.66276 | 0.01267 | Uiso | 1 | -0.195401 |
| N2  | N | 0.1211 | 0.09006 | 0.8081  | 0.01267 | Uiso | 1 | -0.220458 |
| N3  | N | 0.5418 | 0.44316 | 0.33724 | 0.01267 | Uiso | 1 | -0.194517 |
| N4  | N | 0.3789 | 0.28196 | 0.1919  | 0.01267 | Uiso | 1 | -0.218971 |
| N5  | N | 0.0418 | 0.89408 | 0.33724 | 0.01267 | Uiso | 1 | -0.195332 |
| N6  | N | 0.8789 | 0.90994 | 0.1919  | 0.01267 | Uiso | 1 | -0.220417 |
| N7  | N | 0.4582 | 0.55684 | 0.66276 | 0.01267 | Uiso | 1 | -0.194521 |
| N8  | N | 0.6211 | 0.71804 | 0.8081  | 0.01267 | Uiso | 1 | -0.218883 |
| O1  | O | 0.2312 | 0.19241 | 0.64374 | 0.01267 | Uiso | 1 | -0.528122 |
| O2  | O | 0.4385 | 0.29466 | 0.7052  | 0.01267 | Uiso | 1 | -0.592306 |
| O3  | O | 0.2794 | 0.32141 | 0.33264 | 0.01267 | Uiso | 1 | -0.542479 |
| O4  | O | 0.0402 | 0.2751  | 0.28526 | 0.01267 | Uiso | 1 | -0.587089 |
| O5  | O | 0.2688 | 0.54867 | 0.35626 | 0.01267 | Uiso | 1 | -0.527365 |
| O6  | O | 0.0615 | 0.58946 | 0.2948  | 0.01267 | Uiso | 1 | -0.592308 |
| O7  | O | 0.2206 | 0.98877 | 0.66736 | 0.01267 | Uiso | 1 | -0.543401 |
| O8  | O | 0.4598 | 0.98984 | 0.71474 | 0.01267 | Uiso | 1 | -0.587315 |
| O9  | O | 0.7688 | 0.80759 | 0.35626 | 0.01267 | Uiso | 1 | -0.528027 |
| O10 | O | 0.5615 | 0.70534 | 0.2948  | 0.01267 | Uiso | 1 | -0.592452 |
| O11 | O | 0.7206 | 0.67859 | 0.66736 | 0.01267 | Uiso | 1 | -0.542265 |
| O12 | O | 0.9598 | 0.7249  | 0.71474 | 0.01267 | Uiso | 1 | -0.586957 |
| O13 | O | 0.7312 | 0.45133 | 0.64374 | 0.01267 | Uiso | 1 | -0.527468 |
| O14 | O | 0.9385 | 0.41054 | 0.7052  | 0.01267 | Uiso | 1 | -0.592249 |
| O15 | O | 0.7794 | 0.01123 | 0.33264 | 0.01267 | Uiso | 1 | -0.54321  |
| O16 | O | 0.5402 | 0.01016 | 0.28526 | 0.01267 | Uiso | 1 | -0.587439 |

```

data_XILVIZ_clean
_audit_creation_date 2014-07-02
_audit_creation_method 'Materials Studio'
_symmetry_space_group_name_H-M 'P1'
_symmetry_Int_Tables_number 1
_symmetry_cell_setting triclinic
loop_
_symmetry_equiv_pos_as_xyz
    x,y,z
_cell_length_a 13.372
_cell_length_b 14.164
_cell_length_c 16.713
_cell_angle_alpha 69.626
_cell_angle_beta 68.786
_cell_angle_gamma 73.544
loop_
_atom_site_label
_atom_site_type_symbol
_atom_site_fract_x
_atom_site_fract_y
_atom_site_fract_z
_atom_site_U_iso_or_equiv
_atom_site_adp_type
_atom_site_occupancy
_atom_site_charge
Mn1 Mn 0.5 0 0.5 0.01267 Uiso 1 0.747511
Zn1 Zn 0.08223 0.5671 0.95932 0.01267 Uiso 1 0.84185
Zn2 Zn 0.91777 0.4329 0.04068 0.01267 Uiso 1 0.842176
H1 H 0.9585 0.7741 0.743 0.01267 Uiso 1 0.130874
H2 H 0.854 0.8734 0.632 0.01267 Uiso 1 0.12804
H3 H 0.6155 0.7219 0.7879 0.01267 Uiso 1 0.119626
H4 H 0.7154 0.6239 0.8815 0.01267 Uiso 1 0.120876
H5 H 0.5944 0.9509 0.7812 0.01267 Uiso 1 0.134197
H6 H 0.4435 0.0971 0.7818 0.01267 Uiso 1 0.144741
H7 H 0.188 0.293 0.5731 0.01267 Uiso 1 0.147345
H8 H 0.1805 0.2831 0.4346 0.01267 Uiso 1 0.149143
H9 H 0.3964 0.3265 0.6413 0.01267 Uiso 1 0.109557
H10 H 0.3101 0.4238 0.7526 0.01267 Uiso 1 0.143081
H11 H 0.0837 0.2346 0.8741 0.01267 Uiso 1 0.145317
H12 H 0.1842 0.1455 0.7621 0.01267 Uiso 1 0.118911
H13 H 0.1769 0.5988 0.0814 0.01267 Uiso 1 0.122257
H14 H 0.2908 0.6967 0.0757 0.01267 Uiso 1 0.143765
H15 H 0.3112 0.8303 0.8126 0.01267 Uiso 1 0.157803
H16 H 0.2132 0.7249 0.8316 0.01267 Uiso 1 0.068316
H17 H 0.2633 0.1331 0.9541 0.01267 Uiso 1 0.124709
H18 H 0.6552 0.7598 0.0278 0.01267 Uiso 1 0.127277
H19 H 0.0415 0.2259 0.257 0.01267 Uiso 1 0.130597
H20 H 0.146 0.1266 0.368 0.01267 Uiso 1 0.127729
H21 H 0.3845 0.2781 0.2121 0.01267 Uiso 1 0.119761
H22 H 0.2846 0.3761 0.1185 0.01267 Uiso 1 0.121095
H23 H 0.4056 0.0491 0.2188 0.01267 Uiso 1 0.134269

```

|     |   |        |        |        |         |      |   |           |
|-----|---|--------|--------|--------|---------|------|---|-----------|
| H24 | H | 0.5565 | 0.9029 | 0.2182 | 0.01267 | Uiso | 1 | 0.14479   |
| H25 | H | 0.812  | 0.707  | 0.4269 | 0.01267 | Uiso | 1 | 0.147273  |
| H26 | H | 0.8195 | 0.7169 | 0.5654 | 0.01267 | Uiso | 1 | 0.149106  |
| H27 | H | 0.6036 | 0.6735 | 0.3587 | 0.01267 | Uiso | 1 | 0.109375  |
| H28 | H | 0.6899 | 0.5762 | 0.2474 | 0.01267 | Uiso | 1 | 0.142819  |
| H29 | H | 0.9163 | 0.7654 | 0.1259 | 0.01267 | Uiso | 1 | 0.145471  |
| H30 | H | 0.8158 | 0.8545 | 0.2379 | 0.01267 | Uiso | 1 | 0.119249  |
| H31 | H | 0.8231 | 0.4012 | 0.9186 | 0.01267 | Uiso | 1 | 0.122421  |
| H32 | H | 0.7092 | 0.3033 | 0.9243 | 0.01267 | Uiso | 1 | 0.1438    |
| H33 | H | 0.6888 | 0.1697 | 0.1874 | 0.01267 | Uiso | 1 | 0.157561  |
| H34 | H | 0.7868 | 0.2751 | 0.1684 | 0.01267 | Uiso | 1 | 0.068279  |
| H35 | H | 0.7367 | 0.8669 | 0.0459 | 0.01267 | Uiso | 1 | 0.124714  |
| H36 | H | 0.3448 | 0.2402 | 0.9722 | 0.01267 | Uiso | 1 | 0.127415  |
| C1  | C | 0.9141 | 0.6328 | 0.884  | 0.01267 | Uiso | 1 | 0.55852   |
| C2  | C | 0.8418 | 0.6905 | 0.8205 | 0.01267 | Uiso | 1 | -0.008096 |
| C3  | C | 0.8901 | 0.7629 | 0.7503 | 0.01267 | Uiso | 1 | -0.130741 |
| C4  | C | 0.826  | 0.8247 | 0.684  | 0.01267 | Uiso | 1 | -0.183694 |
| C5  | C | 0.7229 | 0.8031 | 0.707  | 0.01267 | Uiso | 1 | 0.108793  |
| C6  | C | 0.6852 | 0.7332 | 0.7763 | 0.01267 | Uiso | 1 | -0.156586 |
| C7  | C | 0.7444 | 0.6754 | 0.8328 | 0.01267 | Uiso | 1 | -0.080339 |
| C8  | C | 0.6566 | 0.8651 | 0.641  | 0.01267 | Uiso | 1 | -0.086588 |
| C9  | C | 0.5809 | 0.9465 | 0.6601 | 0.01267 | Uiso | 1 | 0.1673    |
| C10 | C | 0.5575 | 0.9802 | 0.7382 | 0.01267 | Uiso | 1 | -0.172248 |
| C11 | C | 0.4744 | 0.0604 | 0.7395 | 0.01267 | Uiso | 1 | -0.177106 |
| C12 | C | 0.4442 | 0.0765 | 0.6615 | 0.01267 | Uiso | 1 | 0.187264  |
| C13 | C | 0.3532 | 0.1542 | 0.64   | 0.01267 | Uiso | 1 | -0.070738 |
| C14 | C | 0.3294 | 0.1717 | 0.5624 | 0.01267 | Uiso | 1 | 0.172977  |
| C15 | C | 0.2353 | 0.2487 | 0.5399 | 0.01267 | Uiso | 1 | -0.157825 |
| C16 | C | 0.2308 | 0.2431 | 0.4652 | 0.01267 | Uiso | 1 | -0.162205 |
| C17 | C | 0.3202 | 0.1618 | 0.4385 | 0.01267 | Uiso | 1 | 0.165429  |
| C18 | C | 0.2992 | 0.2188 | 0.6987 | 0.01267 | Uiso | 1 | 0.090091  |
| C19 | C | 0.3364 | 0.3072 | 0.6891 | 0.01267 | Uiso | 1 | -0.155406 |
| C20 | C | 0.2822 | 0.3701 | 0.7535 | 0.01267 | Uiso | 1 | -0.136148 |
| C21 | C | 0.1872 | 0.3415 | 0.8144 | 0.01267 | Uiso | 1 | -0.024103 |
| C22 | C | 0.1449 | 0.2548 | 0.8282 | 0.01267 | Uiso | 1 | -0.114679 |
| C23 | C | 0.211  | 0.2006 | 0.7602 | 0.01267 | Uiso | 1 | -0.156657 |
| C24 | C | 0.1193 | 0.4083 | 0.8888 | 0.01267 | Uiso | 1 | 0.540081  |
| C25 | C | 0.2032 | 0.6457 | 0.0274 | 0.01267 | Uiso | 1 | 0.048217  |
| C26 | C | 0.2713 | 0.7116 | 0.024  | 0.01267 | Uiso | 1 | -0.216091 |
| C27 | C | 0.3109 | 0.7915 | 0.9572 | 0.01267 | Uiso | 1 | 0.25924   |
| C28 | C | 0.285  | 0.7881 | 0.8694 | 0.01267 | Uiso | 1 | -0.251416 |
| C29 | C | 0.2208 | 0.7172 | 0.8868 | 0.01267 | Uiso | 1 | 0.145494  |
| C30 | C | 0.327  | 0.9523 | 0.9525 | 0.01267 | Uiso | 1 | 0.41061   |
| C31 | C | 0.467  | 0.802  | 0.9831 | 0.01267 | Uiso | 1 | 0.388524  |
| C32 | C | 0.3296 | 0.1061 | 0.9667 | 0.01267 | Uiso | 1 | -0.070675 |
| C33 | C | 0.369  | 0.008  | 0.9712 | 0.01267 | Uiso | 1 | -0.080115 |
| C34 | C | 0.4772 | 0.9639 | 0.9928 | 0.01267 | Uiso | 1 | 0.012525  |
| C35 | C | 0.522  | 0.8616 | 0.998  | 0.01267 | Uiso | 1 | -0.068166 |
| C36 | C | 0.6218 | 0.8281 | 0.0209 | 0.01267 | Uiso | 1 | -0.079941 |
| C37 | C | 0.0859 | 0.3672 | 0.116  | 0.01267 | Uiso | 1 | 0.55846   |
| C38 | C | 0.1582 | 0.3095 | 0.1795 | 0.01267 | Uiso | 1 | -0.007952 |
| C39 | C | 0.1099 | 0.2371 | 0.2497 | 0.01267 | Uiso | 1 | -0.130627 |

|     |   |        |        |        |         |      |   |           |
|-----|---|--------|--------|--------|---------|------|---|-----------|
| C40 | C | 0.174  | 0.1753 | 0.316  | 0.01267 | Uiso | 1 | -0.183616 |
| C41 | C | 0.2771 | 0.1969 | 0.293  | 0.01267 | Uiso | 1 | 0.108544  |
| C42 | C | 0.3148 | 0.2668 | 0.2237 | 0.01267 | Uiso | 1 | -0.156495 |
| C43 | C | 0.2556 | 0.3246 | 0.1672 | 0.01267 | Uiso | 1 | -0.080333 |
| C44 | C | 0.3434 | 0.1349 | 0.359  | 0.01267 | Uiso | 1 | -0.086358 |
| C45 | C | 0.4191 | 0.0535 | 0.3399 | 0.01267 | Uiso | 1 | 0.167287  |
| C46 | C | 0.4425 | 0.0198 | 0.2618 | 0.01267 | Uiso | 1 | -0.172149 |
| C47 | C | 0.5256 | 0.9396 | 0.2605 | 0.01267 | Uiso | 1 | -0.177382 |
| C48 | C | 0.5558 | 0.9235 | 0.3385 | 0.01267 | Uiso | 1 | 0.187431  |
| C49 | C | 0.6468 | 0.8458 | 0.36   | 0.01267 | Uiso | 1 | -0.070634 |
| C50 | C | 0.6706 | 0.8283 | 0.4376 | 0.01267 | Uiso | 1 | 0.172877  |
| C51 | C | 0.7647 | 0.7513 | 0.4601 | 0.01267 | Uiso | 1 | -0.157821 |
| C52 | C | 0.7692 | 0.7569 | 0.5348 | 0.01267 | Uiso | 1 | -0.162252 |
| C53 | C | 0.6798 | 0.8382 | 0.5615 | 0.01267 | Uiso | 1 | 0.165522  |
| C54 | C | 0.7008 | 0.7812 | 0.3013 | 0.01267 | Uiso | 1 | 0.089947  |
| C55 | C | 0.6636 | 0.6928 | 0.3109 | 0.01267 | Uiso | 1 | -0.155385 |
| C56 | C | 0.7178 | 0.6299 | 0.2465 | 0.01267 | Uiso | 1 | -0.13607  |
| C57 | C | 0.8128 | 0.6585 | 0.1856 | 0.01267 | Uiso | 1 | -0.024229 |
| C58 | C | 0.8551 | 0.7452 | 0.1718 | 0.01267 | Uiso | 1 | -0.114555 |
| C59 | C | 0.789  | 0.7994 | 0.2398 | 0.01267 | Uiso | 1 | -0.156688 |
| C60 | C | 0.8807 | 0.5917 | 0.1112 | 0.01267 | Uiso | 1 | 0.540101  |
| C61 | C | 0.7968 | 0.3543 | 0.9726 | 0.01267 | Uiso | 1 | 0.048348  |
| C62 | C | 0.7287 | 0.2884 | 0.976  | 0.01267 | Uiso | 1 | -0.215987 |
| C63 | C | 0.6891 | 0.2085 | 0.0428 | 0.01267 | Uiso | 1 | 0.259153  |
| C64 | C | 0.715  | 0.2119 | 0.1306 | 0.01267 | Uiso | 1 | -0.251339 |
| C65 | C | 0.7792 | 0.2828 | 0.1132 | 0.01267 | Uiso | 1 | 0.145308  |
| C66 | C | 0.673  | 0.0477 | 0.0475 | 0.01267 | Uiso | 1 | 0.410501  |
| C67 | C | 0.533  | 0.198  | 0.0169 | 0.01267 | Uiso | 1 | 0.388522  |
| C68 | C | 0.6704 | 0.8939 | 0.0333 | 0.01267 | Uiso | 1 | -0.070718 |
| C69 | C | 0.631  | 0.992  | 0.0288 | 0.01267 | Uiso | 1 | -0.080056 |
| C70 | C | 0.5228 | 0.0361 | 0.0072 | 0.01267 | Uiso | 1 | 0.012555  |
| C71 | C | 0.478  | 0.1384 | 0.002  | 0.01267 | Uiso | 1 | -0.068145 |
| C72 | C | 0.3782 | 0.1719 | 0.9791 | 0.01267 | Uiso | 1 | -0.07996  |
| N1  | N | 0.5055 | 0.0106 | 0.6119 | 0.01267 | Uiso | 1 | -0.360085 |
| N2  | N | 0.3752 | 0.1119 | 0.5046 | 0.01267 | Uiso | 1 | -0.34709  |
| N3  | N | 0.1696 | 0.6501 | 0.9379 | 0.01267 | Uiso | 1 | -0.190614 |
| N4  | N | 0.3645 | 0.8529 | 0.9594 | 0.01267 | Uiso | 1 | -0.152184 |
| N5  | N | 0.4945 | 0.9894 | 0.3881 | 0.01267 | Uiso | 1 | -0.360068 |
| N6  | N | 0.6248 | 0.8881 | 0.4954 | 0.01267 | Uiso | 1 | -0.346895 |
| N7  | N | 0.8304 | 0.3499 | 0.0621 | 0.01267 | Uiso | 1 | -0.190599 |
| N8  | N | 0.6355 | 0.1471 | 0.0406 | 0.01267 | Uiso | 1 | -0.1522   |
| O1  | O | 0.9985 | 0.6589 | 0.8749 | 0.01267 | Uiso | 1 | -0.490202 |
| O2  | O | 0.8684 | 0.5545 | 0.9415 | 0.01267 | Uiso | 1 | -0.588499 |
| O3  | O | 0.0331 | 0.3755 | 0.94   | 0.01267 | Uiso | 1 | -0.532206 |
| O4  | O | 0.1618 | 0.4838 | 0.874  | 0.01267 | Uiso | 1 | -0.503482 |
| O5  | O | 0.237  | 0.9788 | 0.9327 | 0.01267 | Uiso | 1 | -0.481585 |
| O6  | O | 0.5033 | 0.7082 | 0.9884 | 0.01267 | Uiso | 1 | -0.421504 |
| O7  | O | 0.0015 | 0.3411 | 0.1251 | 0.01267 | Uiso | 1 | -0.490491 |
| O8  | O | 0.1316 | 0.4455 | 0.0585 | 0.01267 | Uiso | 1 | -0.588162 |
| O9  | O | 0.9669 | 0.6245 | 0.06   | 0.01267 | Uiso | 1 | -0.53199  |
| O10 | O | 0.8382 | 0.5162 | 0.126  | 0.01267 | Uiso | 1 | -0.503713 |
| O11 | O | 0.763  | 0.0212 | 0.0673 | 0.01267 | Uiso | 1 | -0.481598 |

|                                |    |                    |         |         |          |         |      |           |
|--------------------------------|----|--------------------|---------|---------|----------|---------|------|-----------|
| O12                            | O  | 0.4967             | 0.2918  | 0.0116  | 0.01267  | Uiso    | 1    | -0.421237 |
| data_BEDYEQ_clean              |    |                    |         |         |          |         |      |           |
| _audit_creation_date           |    | 2014-07-02         |         |         |          |         |      |           |
| _audit_creation_method         |    | 'Materials Studio' |         |         |          |         |      |           |
| _symmetry_space_group_name_H-M |    | 'P1'               |         |         |          |         |      |           |
| _symmetry_Int_Tables_number    |    | 1                  |         |         |          |         |      |           |
| _symmetry_cell_setting         |    | triclinic          |         |         |          |         |      |           |
| loop_                          |    |                    |         |         |          |         |      |           |
| _symmetry_equiv_pos_as_xyz     |    | x,y,z              |         |         |          |         |      |           |
| _cell_length_a                 |    | 17.1430            |         |         |          |         |      |           |
| _cell_length_b                 |    | 41.9680            |         |         |          |         |      |           |
| _cell_length_c                 |    | 41.9680            |         |         |          |         |      |           |
| _cell_angle_alpha              |    | 120.0000           |         |         |          |         |      |           |
| _cell_angle_beta               |    | 90.0000            |         |         |          |         |      |           |
| _cell_angle_gamma              |    | 90.0000            |         |         |          |         |      |           |
| loop_                          |    |                    |         |         |          |         |      |           |
| _atom_site_label               |    |                    |         |         |          |         |      |           |
| _atom_site_type_symbol         |    |                    |         |         |          |         |      |           |
| _atom_site_fract_x             |    |                    |         |         |          |         |      |           |
| _atom_site_fract_y             |    |                    |         |         |          |         |      |           |
| _atom_site_fract_z             |    |                    |         |         |          |         |      |           |
| _atom_site_charge              |    |                    |         |         |          |         |      |           |
| _atom_site_U_iso_or_equiv      |    |                    |         |         |          |         |      |           |
| _atom_site_adp_type            |    |                    |         |         |          |         |      |           |
| _atom_site_occupancy           |    |                    |         |         |          |         |      |           |
| Zr1                            | Zr | 0.89734            | 0.54203 | 0.54203 | 2.282158 | 0.01267 | Uiso | 1         |
| Zr2                            | Zr | 0.89734            | 0.00000 | 0.45797 | 2.281823 | 0.01267 | Uiso | 1         |
| Zr3                            | Zr | 0.89734            | 0.45797 | 0.00000 | 2.282760 | 0.01267 | Uiso | 1         |
| Zr4                            | Zr | 0.89734            | 0.45797 | 0.45797 | 2.282281 | 0.01267 | Uiso | 1         |
| Zr5                            | Zr | 0.89734            | 0.00000 | 0.54203 | 2.282464 | 0.01267 | Uiso | 1         |
| Zr6                            | Zr | 0.89734            | 0.54203 | 0.00000 | 2.282288 | 0.01267 | Uiso | 1         |
| Zr7                            | Zr | 0.10266            | 0.00000 | 0.45797 | 2.281822 | 0.01267 | Uiso | 1         |
| Zr8                            | Zr | 0.10266            | 0.54203 | 0.54203 | 2.282215 | 0.01267 | Uiso | 1         |
| Zr9                            | Zr | 0.10266            | 0.45797 | 0.00000 | 2.282801 | 0.01267 | Uiso | 1         |
| Zr10                           | Zr | 0.10266            | 0.00000 | 0.54203 | 2.282403 | 0.01267 | Uiso | 1         |
| Zr11                           | Zr | 0.10266            | 0.45797 | 0.45797 | 2.282299 | 0.01267 | Uiso | 1         |
| Zr12                           | Zr | 0.10266            | 0.54203 | 0.00000 | 2.282493 | 0.01267 | Uiso | 1         |
| Zr13                           | Zr | 0.00000            | 0.46618 | 0.53382 | 2.404926 | 0.01267 | Uiso | 1         |
| Zr14                           | Zr | 0.00000            | 0.06764 | 0.53382 | 2.405164 | 0.01267 | Uiso | 1         |
| Zr15                           | Zr | 0.00000            | 0.46618 | 0.93236 | 2.404685 | 0.01267 | Uiso | 1         |
| Zr16                           | Zr | 0.00000            | 0.53382 | 0.46618 | 2.404994 | 0.01267 | Uiso | 1         |
| Zr17                           | Zr | 0.00000            | 0.93236 | 0.46618 | 2.405230 | 0.01267 | Uiso | 1         |
| Zr18                           | Zr | 0.00000            | 0.53382 | 0.06764 | 2.404933 | 0.01267 | Uiso | 1         |
| Fe1                            | Fe | 0.50000            | 0.48800 | 0.74400 | 0.540530 | 0.01267 | Uiso | 1         |
| Fe2                            | Fe | 0.50000            | 0.25600 | 0.51200 | 0.540536 | 0.01267 | Uiso | 1         |
| Fe3                            | Fe | 0.50000            | 0.25600 | 0.74400 | 0.541852 | 0.01267 | Uiso | 1         |
| Fe4                            | Fe | 0.50000            | 0.51200 | 0.25600 | 0.540233 | 0.01267 | Uiso | 1         |
| Fe5                            | Fe | 0.50000            | 0.74400 | 0.48800 | 0.540852 | 0.01267 | Uiso | 1         |
| Fe6                            | Fe | 0.50000            | 0.74400 | 0.25600 | 0.541236 | 0.01267 | Uiso | 1         |
| H1                             | H  | 0.84230            | 0.45320 | 0.60960 | 0.123376 | 0.01267 | Uiso | 1         |
| H2                             | H  | 0.79110            | 0.50190 | 0.72200 | 0.136479 | 0.01267 | Uiso | 1         |

|     |   |         |         |         |          |         |      |   |
|-----|---|---------|---------|---------|----------|---------|------|---|
| H3  | H | 0.76370 | 0.55450 | 0.63870 | 0.117704 | 0.01267 | Uiso | 1 |
| H4  | H | 0.67550 | 0.55040 | 0.67870 | 0.115530 | 0.01267 | Uiso | 1 |
| H5  | H | 0.75060 | 0.45030 | 0.64980 | 0.122599 | 0.01267 | Uiso | 1 |
| H6  | H | 0.57200 | 0.49690 | 0.63010 | 0.137833 | 0.01267 | Uiso | 1 |
| H7  | H | 0.84230 | 0.15640 | 0.54680 | 0.123492 | 0.01267 | Uiso | 1 |
| H8  | H | 0.79110 | 0.22010 | 0.49810 | 0.136810 | 0.01267 | Uiso | 1 |
| H9  | H | 0.76370 | 0.08420 | 0.44550 | 0.118214 | 0.01267 | Uiso | 1 |
| H10 | H | 0.67550 | 0.12830 | 0.44960 | 0.115418 | 0.01267 | Uiso | 1 |
| H11 | H | 0.75060 | 0.19950 | 0.54970 | 0.122629 | 0.01267 | Uiso | 1 |
| H12 | H | 0.57200 | 0.13320 | 0.50310 | 0.138177 | 0.01267 | Uiso | 1 |
| H13 | H | 0.84230 | 0.39040 | 0.84360 | 0.122831 | 0.01267 | Uiso | 1 |
| H14 | H | 0.79110 | 0.27800 | 0.77990 | 0.137090 | 0.01267 | Uiso | 1 |
| H15 | H | 0.76370 | 0.36130 | 0.91580 | 0.118591 | 0.01267 | Uiso | 1 |
| H16 | H | 0.67550 | 0.32130 | 0.87170 | 0.116041 | 0.01267 | Uiso | 1 |
| H17 | H | 0.75060 | 0.35020 | 0.80050 | 0.121695 | 0.01267 | Uiso | 1 |
| H18 | H | 0.57200 | 0.36990 | 0.86680 | 0.138424 | 0.01267 | Uiso | 1 |
| H19 | H | 0.84230 | 0.54680 | 0.39040 | 0.123194 | 0.01267 | Uiso | 1 |
| H20 | H | 0.79110 | 0.49810 | 0.27800 | 0.136778 | 0.01267 | Uiso | 1 |
| H21 | H | 0.76370 | 0.44550 | 0.36130 | 0.118132 | 0.01267 | Uiso | 1 |
| H22 | H | 0.67550 | 0.44960 | 0.32130 | 0.115718 | 0.01267 | Uiso | 1 |
| H23 | H | 0.75060 | 0.54970 | 0.35020 | 0.122004 | 0.01267 | Uiso | 1 |
| H24 | H | 0.57200 | 0.50310 | 0.36990 | 0.138223 | 0.01267 | Uiso | 1 |
| H25 | H | 0.84230 | 0.84360 | 0.45320 | 0.123126 | 0.01267 | Uiso | 1 |
| H26 | H | 0.79110 | 0.77990 | 0.50190 | 0.136555 | 0.01267 | Uiso | 1 |
| H27 | H | 0.76370 | 0.91580 | 0.55450 | 0.118195 | 0.01267 | Uiso | 1 |
| H28 | H | 0.67550 | 0.87170 | 0.55040 | 0.115912 | 0.01267 | Uiso | 1 |
| H29 | H | 0.75060 | 0.80050 | 0.45030 | 0.122596 | 0.01267 | Uiso | 1 |
| H30 | H | 0.57200 | 0.86680 | 0.49690 | 0.137802 | 0.01267 | Uiso | 1 |
| H31 | H | 0.84230 | 0.60960 | 0.15640 | 0.123238 | 0.01267 | Uiso | 1 |
| H32 | H | 0.79110 | 0.72200 | 0.22010 | 0.136792 | 0.01267 | Uiso | 1 |
| H33 | H | 0.76370 | 0.63870 | 0.08420 | 0.117879 | 0.01267 | Uiso | 1 |
| H34 | H | 0.67550 | 0.67870 | 0.12830 | 0.115374 | 0.01267 | Uiso | 1 |
| H35 | H | 0.75060 | 0.64980 | 0.19950 | 0.122518 | 0.01267 | Uiso | 1 |
| H36 | H | 0.57200 | 0.63010 | 0.13320 | 0.138140 | 0.01267 | Uiso | 1 |
| H37 | H | 0.15770 | 0.84360 | 0.39040 | 0.123358 | 0.01267 | Uiso | 1 |
| H38 | H | 0.20890 | 0.77990 | 0.27800 | 0.136777 | 0.01267 | Uiso | 1 |
| H39 | H | 0.23630 | 0.91580 | 0.36130 | 0.117672 | 0.01267 | Uiso | 1 |
| H40 | H | 0.32450 | 0.87170 | 0.32130 | 0.115224 | 0.01267 | Uiso | 1 |
| H41 | H | 0.24940 | 0.80050 | 0.35020 | 0.122528 | 0.01267 | Uiso | 1 |
| H42 | H | 0.42800 | 0.86680 | 0.36990 | 0.138031 | 0.01267 | Uiso | 1 |
| H43 | H | 0.15770 | 0.60960 | 0.45320 | 0.123231 | 0.01267 | Uiso | 1 |
| H44 | H | 0.20890 | 0.72200 | 0.50190 | 0.136893 | 0.01267 | Uiso | 1 |
| H45 | H | 0.23630 | 0.63870 | 0.55450 | 0.118291 | 0.01267 | Uiso | 1 |
| H46 | H | 0.32450 | 0.67870 | 0.55040 | 0.115873 | 0.01267 | Uiso | 1 |
| H47 | H | 0.24940 | 0.64980 | 0.45030 | 0.121936 | 0.01267 | Uiso | 1 |
| H48 | H | 0.42800 | 0.63010 | 0.49690 | 0.138211 | 0.01267 | Uiso | 1 |
| H49 | H | 0.15770 | 0.54680 | 0.15640 | 0.123108 | 0.01267 | Uiso | 1 |
| H50 | H | 0.20890 | 0.49810 | 0.22010 | 0.136554 | 0.01267 | Uiso | 1 |
| H51 | H | 0.23630 | 0.44550 | 0.08420 | 0.118123 | 0.01267 | Uiso | 1 |
| H52 | H | 0.32450 | 0.44960 | 0.12830 | 0.115698 | 0.01267 | Uiso | 1 |
| H53 | H | 0.24940 | 0.54970 | 0.19950 | 0.122554 | 0.01267 | Uiso | 1 |
| H54 | H | 0.42800 | 0.50310 | 0.13320 | 0.137900 | 0.01267 | Uiso | 1 |

|      |   |         |         |         |          |         |      |   |
|------|---|---------|---------|---------|----------|---------|------|---|
| H55  | H | 0.15770 | 0.15640 | 0.60960 | 0.122989 | 0.01267 | Uiso | 1 |
| H56  | H | 0.20890 | 0.22010 | 0.72200 | 0.136909 | 0.01267 | Uiso | 1 |
| H57  | H | 0.23630 | 0.08420 | 0.63870 | 0.118261 | 0.01267 | Uiso | 1 |
| H58  | H | 0.32450 | 0.12830 | 0.67870 | 0.115965 | 0.01267 | Uiso | 1 |
| H59  | H | 0.24940 | 0.19950 | 0.64980 | 0.121919 | 0.01267 | Uiso | 1 |
| H60  | H | 0.42800 | 0.13320 | 0.63010 | 0.138221 | 0.01267 | Uiso | 1 |
| H61  | H | 0.15770 | 0.39040 | 0.54680 | 0.123337 | 0.01267 | Uiso | 1 |
| H62  | H | 0.20890 | 0.27800 | 0.49810 | 0.136480 | 0.01267 | Uiso | 1 |
| H63  | H | 0.23630 | 0.36130 | 0.44550 | 0.117752 | 0.01267 | Uiso | 1 |
| H64  | H | 0.32450 | 0.32130 | 0.44960 | 0.115570 | 0.01267 | Uiso | 1 |
| H65  | H | 0.24940 | 0.35020 | 0.54970 | 0.122607 | 0.01267 | Uiso | 1 |
| H66  | H | 0.42800 | 0.36990 | 0.50310 | 0.137887 | 0.01267 | Uiso | 1 |
| H67  | H | 0.15770 | 0.45320 | 0.84360 | 0.123496 | 0.01267 | Uiso | 1 |
| H68  | H | 0.20890 | 0.50190 | 0.77990 | 0.136744 | 0.01267 | Uiso | 1 |
| H69  | H | 0.23630 | 0.55450 | 0.91580 | 0.118471 | 0.01267 | Uiso | 1 |
| H70  | H | 0.32450 | 0.55040 | 0.87170 | 0.115340 | 0.01267 | Uiso | 1 |
| H71  | H | 0.24940 | 0.45030 | 0.80050 | 0.122330 | 0.01267 | Uiso | 1 |
| H72  | H | 0.42800 | 0.49690 | 0.86680 | 0.138521 | 0.01267 | Uiso | 1 |
| H73  | H | 0.15770 | 0.54680 | 0.39040 | 0.123182 | 0.01267 | Uiso | 1 |
| H74  | H | 0.20890 | 0.49810 | 0.27800 | 0.136639 | 0.01267 | Uiso | 1 |
| H75  | H | 0.23630 | 0.44550 | 0.36130 | 0.118141 | 0.01267 | Uiso | 1 |
| H76  | H | 0.32450 | 0.44960 | 0.32130 | 0.115766 | 0.01267 | Uiso | 1 |
| H77  | H | 0.24940 | 0.54970 | 0.35020 | 0.121967 | 0.01267 | Uiso | 1 |
| H78  | H | 0.42800 | 0.50310 | 0.36990 | 0.138120 | 0.01267 | Uiso | 1 |
| H79  | H | 0.15770 | 0.84360 | 0.45320 | 0.123075 | 0.01267 | Uiso | 1 |
| H80  | H | 0.20890 | 0.77990 | 0.50190 | 0.136502 | 0.01267 | Uiso | 1 |
| H81  | H | 0.23630 | 0.91580 | 0.55450 | 0.118166 | 0.01267 | Uiso | 1 |
| H82  | H | 0.32450 | 0.87170 | 0.55040 | 0.115927 | 0.01267 | Uiso | 1 |
| H83  | H | 0.24940 | 0.80050 | 0.45030 | 0.122594 | 0.01267 | Uiso | 1 |
| H84  | H | 0.42800 | 0.86680 | 0.49690 | 0.137726 | 0.01267 | Uiso | 1 |
| H85  | H | 0.15770 | 0.60960 | 0.15640 | 0.123233 | 0.01267 | Uiso | 1 |
| H86  | H | 0.20890 | 0.72200 | 0.22010 | 0.136766 | 0.01267 | Uiso | 1 |
| H87  | H | 0.23630 | 0.63870 | 0.08420 | 0.117829 | 0.01267 | Uiso | 1 |
| H88  | H | 0.32450 | 0.67870 | 0.12830 | 0.115416 | 0.01267 | Uiso | 1 |
| H89  | H | 0.24940 | 0.64980 | 0.19950 | 0.122509 | 0.01267 | Uiso | 1 |
| H90  | H | 0.42800 | 0.63010 | 0.13320 | 0.138097 | 0.01267 | Uiso | 1 |
| H91  | H | 0.15770 | 0.45320 | 0.60960 | 0.123303 | 0.01267 | Uiso | 1 |
| H92  | H | 0.20890 | 0.50190 | 0.72200 | 0.136471 | 0.01267 | Uiso | 1 |
| H93  | H | 0.23630 | 0.55450 | 0.63870 | 0.117667 | 0.01267 | Uiso | 1 |
| H94  | H | 0.32450 | 0.55040 | 0.67870 | 0.115591 | 0.01267 | Uiso | 1 |
| H95  | H | 0.24940 | 0.45030 | 0.64980 | 0.122592 | 0.01267 | Uiso | 1 |
| H96  | H | 0.42800 | 0.49690 | 0.63010 | 0.137878 | 0.01267 | Uiso | 1 |
| H97  | H | 0.15770 | 0.15640 | 0.54680 | 0.123367 | 0.01267 | Uiso | 1 |
| H98  | H | 0.20890 | 0.22010 | 0.49810 | 0.136702 | 0.01267 | Uiso | 1 |
| H99  | H | 0.23630 | 0.08420 | 0.44550 | 0.118222 | 0.01267 | Uiso | 1 |
| H100 | H | 0.32450 | 0.12830 | 0.44960 | 0.115452 | 0.01267 | Uiso | 1 |
| H101 | H | 0.24940 | 0.19950 | 0.54970 | 0.122629 | 0.01267 | Uiso | 1 |
| H102 | H | 0.42800 | 0.13320 | 0.50310 | 0.138074 | 0.01267 | Uiso | 1 |
| H103 | H | 0.15770 | 0.39040 | 0.84360 | 0.122863 | 0.01267 | Uiso | 1 |
| H104 | H | 0.20890 | 0.27800 | 0.77990 | 0.136937 | 0.01267 | Uiso | 1 |
| H105 | H | 0.23630 | 0.36130 | 0.91580 | 0.118573 | 0.01267 | Uiso | 1 |
| H106 | H | 0.32450 | 0.32130 | 0.87170 | 0.116064 | 0.01267 | Uiso | 1 |

|      |   |         |         |         |           |         |      |   |
|------|---|---------|---------|---------|-----------|---------|------|---|
| H107 | H | 0.24940 | 0.35020 | 0.80050 | 0.121757  | 0.01267 | Uiso | 1 |
| H108 | H | 0.42800 | 0.36990 | 0.86680 | 0.138263  | 0.01267 | Uiso | 1 |
| H109 | H | 0.84230 | 0.15640 | 0.60960 | 0.122994  | 0.01267 | Uiso | 1 |
| H110 | H | 0.79110 | 0.22010 | 0.72200 | 0.136919  | 0.01267 | Uiso | 1 |
| H111 | H | 0.76370 | 0.08420 | 0.63870 | 0.118309  | 0.01267 | Uiso | 1 |
| H112 | H | 0.67550 | 0.12830 | 0.67870 | 0.115949  | 0.01267 | Uiso | 1 |
| H113 | H | 0.75060 | 0.19950 | 0.64980 | 0.121868  | 0.01267 | Uiso | 1 |
| H114 | H | 0.57200 | 0.13320 | 0.63010 | 0.138154  | 0.01267 | Uiso | 1 |
| H115 | H | 0.84230 | 0.39040 | 0.54680 | 0.123398  | 0.01267 | Uiso | 1 |
| H116 | H | 0.79110 | 0.27800 | 0.49810 | 0.136574  | 0.01267 | Uiso | 1 |
| H117 | H | 0.76370 | 0.36130 | 0.44550 | 0.117762  | 0.01267 | Uiso | 1 |
| H118 | H | 0.67550 | 0.32130 | 0.44960 | 0.115537  | 0.01267 | Uiso | 1 |
| H119 | H | 0.75060 | 0.35020 | 0.54970 | 0.122574  | 0.01267 | Uiso | 1 |
| H120 | H | 0.57200 | 0.36990 | 0.50310 | 0.137799  | 0.01267 | Uiso | 1 |
| H121 | H | 0.84230 | 0.45320 | 0.84360 | 0.123588  | 0.01267 | Uiso | 1 |
| H122 | H | 0.79110 | 0.50190 | 0.77990 | 0.136870  | 0.01267 | Uiso | 1 |
| H123 | H | 0.76370 | 0.55450 | 0.91580 | 0.118459  | 0.01267 | Uiso | 1 |
| H124 | H | 0.67550 | 0.55040 | 0.87170 | 0.115318  | 0.01267 | Uiso | 1 |
| H125 | H | 0.75060 | 0.45030 | 0.80050 | 0.122345  | 0.01267 | Uiso | 1 |
| H126 | H | 0.57200 | 0.49690 | 0.86680 | 0.138604  | 0.01267 | Uiso | 1 |
| H127 | H | 0.84230 | 0.84360 | 0.39040 | 0.123429  | 0.01267 | Uiso | 1 |
| H128 | H | 0.79110 | 0.77990 | 0.27800 | 0.136760  | 0.01267 | Uiso | 1 |
| H129 | H | 0.76370 | 0.91580 | 0.36130 | 0.117698  | 0.01267 | Uiso | 1 |
| H130 | H | 0.67550 | 0.87170 | 0.32130 | 0.115214  | 0.01267 | Uiso | 1 |
| H131 | H | 0.75060 | 0.80050 | 0.35020 | 0.122534  | 0.01267 | Uiso | 1 |
| H132 | H | 0.57200 | 0.86680 | 0.36990 | 0.138035  | 0.01267 | Uiso | 1 |
| H133 | H | 0.84230 | 0.60960 | 0.45320 | 0.123246  | 0.01267 | Uiso | 1 |
| H134 | H | 0.79110 | 0.72200 | 0.50190 | 0.136849  | 0.01267 | Uiso | 1 |
| H135 | H | 0.76370 | 0.63870 | 0.55450 | 0.118313  | 0.01267 | Uiso | 1 |
| H136 | H | 0.67550 | 0.67870 | 0.55040 | 0.115852  | 0.01267 | Uiso | 1 |
| H137 | H | 0.75060 | 0.64980 | 0.45030 | 0.121897  | 0.01267 | Uiso | 1 |
| H138 | H | 0.57200 | 0.63010 | 0.49690 | 0.138200  | 0.01267 | Uiso | 1 |
| H139 | H | 0.84230 | 0.54680 | 0.15640 | 0.123142  | 0.01267 | Uiso | 1 |
| H140 | H | 0.79110 | 0.49810 | 0.22010 | 0.136539  | 0.01267 | Uiso | 1 |
| H141 | H | 0.76370 | 0.44550 | 0.08420 | 0.118199  | 0.01267 | Uiso | 1 |
| H142 | H | 0.67550 | 0.44960 | 0.12830 | 0.115681  | 0.01267 | Uiso | 1 |
| H143 | H | 0.75060 | 0.54970 | 0.19950 | 0.122561  | 0.01267 | Uiso | 1 |
| H144 | H | 0.57200 | 0.50310 | 0.13320 | 0.137858  | 0.01267 | Uiso | 1 |
| C1   | C | 0.64190 | 0.49774 | 0.69122 | -0.061574 | 0.01267 | Uiso | 1 |
| C2   | C | 0.56460 | 0.49713 | 0.68105 | 0.174345  | 0.01267 | Uiso | 1 |
| C3   | C | 0.80810 | 0.47335 | 0.62354 | -0.098486 | 0.01267 | Uiso | 1 |
| C4   | C | 0.74640 | 0.50031 | 0.73446 | -0.179185 | 0.01267 | Uiso | 1 |
| C5   | C | 0.81240 | 0.50408 | 0.62070 | -0.043231 | 0.01267 | Uiso | 1 |
| C6   | C | 0.86860 | 0.50640 | 0.59408 | 0.666990  | 0.01267 | Uiso | 1 |
| C7   | C | 0.76190 | 0.53299 | 0.64078 | -0.112133 | 0.01267 | Uiso | 1 |
| C8   | C | 0.66660 | 0.49742 | 0.72229 | 0.176287  | 0.01267 | Uiso | 1 |
| C9   | C | 0.70870 | 0.53009 | 0.66405 | -0.150691 | 0.01267 | Uiso | 1 |
| C10  | C | 0.70250 | 0.49952 | 0.66653 | 0.106399  | 0.01267 | Uiso | 1 |
| C11  | C | 0.75280 | 0.47152 | 0.64721 | -0.146887 | 0.01267 | Uiso | 1 |
| C12  | C | 0.53930 | 0.49700 | 0.64841 | -0.182118 | 0.01267 | Uiso | 1 |
| C13  | C | 0.64190 | 0.19348 | 0.50226 | -0.062833 | 0.01267 | Uiso | 1 |
| C14  | C | 0.56460 | 0.18392 | 0.50287 | 0.176673  | 0.01267 | Uiso | 1 |

|     |   |         |         |         |           |         |      |   |
|-----|---|---------|---------|---------|-----------|---------|------|---|
| C15 | C | 0.80810 | 0.15019 | 0.52665 | -0.098695 | 0.01267 | Uiso | 1 |
| C16 | C | 0.74640 | 0.23415 | 0.49969 | -0.180658 | 0.01267 | Uiso | 1 |
| C17 | C | 0.81240 | 0.11662 | 0.49592 | -0.042684 | 0.01267 | Uiso | 1 |
| C18 | C | 0.86860 | 0.08768 | 0.49360 | 0.665783  | 0.01267 | Uiso | 1 |
| C19 | C | 0.76190 | 0.10779 | 0.46701 | -0.112411 | 0.01267 | Uiso | 1 |
| C20 | C | 0.66660 | 0.22487 | 0.50258 | 0.178082  | 0.01267 | Uiso | 1 |
| C21 | C | 0.70870 | 0.13396 | 0.46991 | -0.150826 | 0.01267 | Uiso | 1 |
| C22 | C | 0.70250 | 0.16701 | 0.50048 | 0.106914  | 0.01267 | Uiso | 1 |
| C23 | C | 0.75280 | 0.17569 | 0.52848 | -0.147488 | 0.01267 | Uiso | 1 |
| C24 | C | 0.53930 | 0.15141 | 0.50300 | -0.184117 | 0.01267 | Uiso | 1 |
| C25 | C | 0.64190 | 0.30878 | 0.80652 | -0.062285 | 0.01267 | Uiso | 1 |
| C26 | C | 0.56460 | 0.31895 | 0.81608 | 0.175585  | 0.01267 | Uiso | 1 |
| C27 | C | 0.80810 | 0.37646 | 0.84981 | -0.098769 | 0.01267 | Uiso | 1 |
| C28 | C | 0.74640 | 0.26554 | 0.76585 | -0.180465 | 0.01267 | Uiso | 1 |
| C29 | C | 0.81240 | 0.37930 | 0.88338 | -0.042640 | 0.01267 | Uiso | 1 |
| C30 | C | 0.86860 | 0.40592 | 0.91232 | 0.665477  | 0.01267 | Uiso | 1 |
| C31 | C | 0.76190 | 0.35922 | 0.89221 | -0.111861 | 0.01267 | Uiso | 1 |
| C32 | C | 0.66660 | 0.27771 | 0.77513 | 0.177783  | 0.01267 | Uiso | 1 |
| C33 | C | 0.70870 | 0.33595 | 0.86604 | -0.150908 | 0.01267 | Uiso | 1 |
| C34 | C | 0.70250 | 0.33347 | 0.83299 | 0.106548  | 0.01267 | Uiso | 1 |
| C35 | C | 0.75280 | 0.35279 | 0.82431 | -0.146902 | 0.01267 | Uiso | 1 |
| C36 | C | 0.53930 | 0.35159 | 0.84859 | -0.183312 | 0.01267 | Uiso | 1 |
| C37 | C | 0.64190 | 0.50226 | 0.30878 | -0.062831 | 0.01267 | Uiso | 1 |
| C38 | C | 0.56460 | 0.50287 | 0.31895 | 0.176008  | 0.01267 | Uiso | 1 |
| C39 | C | 0.80810 | 0.52665 | 0.37646 | -0.098804 | 0.01267 | Uiso | 1 |
| C40 | C | 0.74640 | 0.49969 | 0.26554 | -0.180849 | 0.01267 | Uiso | 1 |
| C41 | C | 0.81240 | 0.49592 | 0.37930 | -0.043041 | 0.01267 | Uiso | 1 |
| C42 | C | 0.86860 | 0.49360 | 0.40592 | 0.666712  | 0.01267 | Uiso | 1 |
| C43 | C | 0.76190 | 0.46701 | 0.35922 | -0.112179 | 0.01267 | Uiso | 1 |
| C44 | C | 0.66660 | 0.50258 | 0.27771 | 0.177928  | 0.01267 | Uiso | 1 |
| C45 | C | 0.70870 | 0.46991 | 0.33595 | -0.150903 | 0.01267 | Uiso | 1 |
| C46 | C | 0.70250 | 0.50048 | 0.33347 | 0.106911  | 0.01267 | Uiso | 1 |
| C47 | C | 0.75280 | 0.52848 | 0.35279 | -0.146874 | 0.01267 | Uiso | 1 |
| C48 | C | 0.53930 | 0.50300 | 0.35159 | -0.183923 | 0.01267 | Uiso | 1 |
| C49 | C | 0.64190 | 0.80652 | 0.49774 | -0.062426 | 0.01267 | Uiso | 1 |
| C50 | C | 0.56460 | 0.81608 | 0.49713 | 0.175766  | 0.01267 | Uiso | 1 |
| C51 | C | 0.80810 | 0.84981 | 0.47335 | -0.098545 | 0.01267 | Uiso | 1 |
| C52 | C | 0.74640 | 0.76585 | 0.50031 | -0.179787 | 0.01267 | Uiso | 1 |
| C53 | C | 0.81240 | 0.88338 | 0.50408 | -0.042968 | 0.01267 | Uiso | 1 |
| C54 | C | 0.86860 | 0.91232 | 0.50640 | 0.665946  | 0.01267 | Uiso | 1 |
| C55 | C | 0.76190 | 0.89221 | 0.53299 | -0.112284 | 0.01267 | Uiso | 1 |
| C56 | C | 0.66660 | 0.77513 | 0.49742 | 0.177022  | 0.01267 | Uiso | 1 |
| C57 | C | 0.70870 | 0.86604 | 0.53009 | -0.151042 | 0.01267 | Uiso | 1 |
| C58 | C | 0.70250 | 0.83299 | 0.49952 | 0.106958  | 0.01267 | Uiso | 1 |
| C59 | C | 0.75280 | 0.82431 | 0.47152 | -0.147309 | 0.01267 | Uiso | 1 |
| C60 | C | 0.53930 | 0.84859 | 0.49700 | -0.183605 | 0.01267 | Uiso | 1 |
| C61 | C | 0.64190 | 0.69122 | 0.19348 | -0.062565 | 0.01267 | Uiso | 1 |
| C62 | C | 0.56460 | 0.68105 | 0.18392 | 0.175588  | 0.01267 | Uiso | 1 |
| C63 | C | 0.80810 | 0.62354 | 0.15019 | -0.098368 | 0.01267 | Uiso | 1 |
| C64 | C | 0.74640 | 0.73446 | 0.23415 | -0.180120 | 0.01267 | Uiso | 1 |
| C65 | C | 0.81240 | 0.62070 | 0.11662 | -0.042843 | 0.01267 | Uiso | 1 |
| C66 | C | 0.86860 | 0.59408 | 0.08768 | 0.665628  | 0.01267 | Uiso | 1 |

|      |   |         |         |         |           |         |      |   |
|------|---|---------|---------|---------|-----------|---------|------|---|
| C67  | C | 0.76190 | 0.64078 | 0.10779 | -0.112379 | 0.01267 | Uiso | 1 |
| C68  | C | 0.66660 | 0.72229 | 0.22487 | 0.177213  | 0.01267 | Uiso | 1 |
| C69  | C | 0.70870 | 0.66405 | 0.13396 | -0.150818 | 0.01267 | Uiso | 1 |
| C70  | C | 0.70250 | 0.66653 | 0.16701 | 0.106997  | 0.01267 | Uiso | 1 |
| C71  | C | 0.75280 | 0.64721 | 0.17569 | -0.147098 | 0.01267 | Uiso | 1 |
| C72  | C | 0.53930 | 0.64841 | 0.15141 | -0.183648 | 0.01267 | Uiso | 1 |
| C73  | C | 0.35810 | 0.80652 | 0.30878 | -0.062477 | 0.01267 | Uiso | 1 |
| C74  | C | 0.43540 | 0.81608 | 0.31895 | 0.175605  | 0.01267 | Uiso | 1 |
| C75  | C | 0.19190 | 0.84981 | 0.37646 | -0.098544 | 0.01267 | Uiso | 1 |
| C76  | C | 0.25360 | 0.76585 | 0.26554 | -0.180199 | 0.01267 | Uiso | 1 |
| C77  | C | 0.18760 | 0.88338 | 0.37930 | -0.043020 | 0.01267 | Uiso | 1 |
| C78  | C | 0.13140 | 0.91232 | 0.40592 | 0.665976  | 0.01267 | Uiso | 1 |
| C79  | C | 0.23810 | 0.89221 | 0.35922 | -0.112385 | 0.01267 | Uiso | 1 |
| C80  | C | 0.33340 | 0.77513 | 0.27771 | 0.177178  | 0.01267 | Uiso | 1 |
| C81  | C | 0.29130 | 0.86604 | 0.33595 | -0.150383 | 0.01267 | Uiso | 1 |
| C82  | C | 0.29750 | 0.83299 | 0.33347 | 0.106659  | 0.01267 | Uiso | 1 |
| C83  | C | 0.24720 | 0.82431 | 0.35279 | -0.146769 | 0.01267 | Uiso | 1 |
| C84  | C | 0.46070 | 0.84859 | 0.35159 | -0.183685 | 0.01267 | Uiso | 1 |
| C85  | C | 0.35810 | 0.69122 | 0.49774 | -0.062367 | 0.01267 | Uiso | 1 |
| C86  | C | 0.43540 | 0.68105 | 0.49713 | 0.175918  | 0.01267 | Uiso | 1 |
| C87  | C | 0.19190 | 0.62354 | 0.47335 | -0.098718 | 0.01267 | Uiso | 1 |
| C88  | C | 0.25360 | 0.73446 | 0.50031 | -0.179758 | 0.01267 | Uiso | 1 |
| C89  | C | 0.18760 | 0.62070 | 0.50408 | -0.042891 | 0.01267 | Uiso | 1 |
| C90  | C | 0.13140 | 0.59408 | 0.50640 | 0.665783  | 0.01267 | Uiso | 1 |
| C91  | C | 0.23810 | 0.64078 | 0.53299 | -0.111976 | 0.01267 | Uiso | 1 |
| C92  | C | 0.33340 | 0.72229 | 0.49742 | 0.177314  | 0.01267 | Uiso | 1 |
| C93  | C | 0.29130 | 0.66405 | 0.53009 | -0.151002 | 0.01267 | Uiso | 1 |
| C94  | C | 0.29750 | 0.66653 | 0.49952 | 0.106653  | 0.01267 | Uiso | 1 |
| C95  | C | 0.24720 | 0.64721 | 0.47152 | -0.146867 | 0.01267 | Uiso | 1 |
| C96  | C | 0.46070 | 0.64841 | 0.49700 | -0.183581 | 0.01267 | Uiso | 1 |
| C97  | C | 0.35810 | 0.50226 | 0.19348 | -0.062820 | 0.01267 | Uiso | 1 |
| C98  | C | 0.43540 | 0.50287 | 0.18392 | 0.175861  | 0.01267 | Uiso | 1 |
| C99  | C | 0.19190 | 0.52665 | 0.15019 | -0.098658 | 0.01267 | Uiso | 1 |
| C100 | C | 0.25360 | 0.49969 | 0.23415 | -0.180830 | 0.01267 | Uiso | 1 |
| C101 | C | 0.18760 | 0.49592 | 0.11662 | -0.042994 | 0.01267 | Uiso | 1 |
| C102 | C | 0.13140 | 0.49360 | 0.08768 | 0.665866  | 0.01267 | Uiso | 1 |
| C103 | C | 0.23810 | 0.46701 | 0.10779 | -0.112320 | 0.01267 | Uiso | 1 |
| C104 | C | 0.33340 | 0.50258 | 0.22487 | 0.177830  | 0.01267 | Uiso | 1 |
| C105 | C | 0.29130 | 0.46991 | 0.13396 | -0.150951 | 0.01267 | Uiso | 1 |
| C106 | C | 0.29750 | 0.50048 | 0.16701 | 0.107139  | 0.01267 | Uiso | 1 |
| C107 | C | 0.24720 | 0.52848 | 0.17569 | -0.147157 | 0.01267 | Uiso | 1 |
| C108 | C | 0.46070 | 0.50300 | 0.15141 | -0.183987 | 0.01267 | Uiso | 1 |
| C109 | C | 0.35810 | 0.19348 | 0.69122 | -0.062216 | 0.01267 | Uiso | 1 |
| C110 | C | 0.43540 | 0.18392 | 0.68105 | 0.175534  | 0.01267 | Uiso | 1 |
| C111 | C | 0.19190 | 0.15019 | 0.62354 | -0.098727 | 0.01267 | Uiso | 1 |
| C112 | C | 0.25360 | 0.23415 | 0.73446 | -0.180482 | 0.01267 | Uiso | 1 |
| C113 | C | 0.18760 | 0.11662 | 0.62070 | -0.042867 | 0.01267 | Uiso | 1 |
| C114 | C | 0.13140 | 0.08768 | 0.59408 | 0.665658  | 0.01267 | Uiso | 1 |
| C115 | C | 0.23810 | 0.10779 | 0.64078 | -0.111763 | 0.01267 | Uiso | 1 |
| C116 | C | 0.33340 | 0.22487 | 0.72229 | 0.177724  | 0.01267 | Uiso | 1 |
| C117 | C | 0.29130 | 0.13396 | 0.66405 | -0.150829 | 0.01267 | Uiso | 1 |
| C118 | C | 0.29750 | 0.16701 | 0.66653 | 0.106454  | 0.01267 | Uiso | 1 |

|      |   |         |         |         |           |         |      |   |
|------|---|---------|---------|---------|-----------|---------|------|---|
| C119 | C | 0.24720 | 0.17569 | 0.64721 | -0.146833 | 0.01267 | Uiso | 1 |
| C120 | C | 0.46070 | 0.15141 | 0.64841 | -0.183315 | 0.01267 | Uiso | 1 |
| C121 | C | 0.35810 | 0.30878 | 0.50226 | -0.062497 | 0.01267 | Uiso | 1 |
| C122 | C | 0.43540 | 0.31895 | 0.50287 | 0.176451  | 0.01267 | Uiso | 1 |
| C123 | C | 0.19190 | 0.37646 | 0.52665 | -0.098675 | 0.01267 | Uiso | 1 |
| C124 | C | 0.25360 | 0.26554 | 0.49969 | -0.180539 | 0.01267 | Uiso | 1 |
| C125 | C | 0.18760 | 0.37930 | 0.49592 | -0.043393 | 0.01267 | Uiso | 1 |
| C126 | C | 0.13140 | 0.40592 | 0.49360 | 0.667123  | 0.01267 | Uiso | 1 |
| C127 | C | 0.23810 | 0.35922 | 0.46701 | -0.112148 | 0.01267 | Uiso | 1 |
| C128 | C | 0.33340 | 0.27771 | 0.50258 | 0.177940  | 0.01267 | Uiso | 1 |
| C129 | C | 0.29130 | 0.33595 | 0.46991 | -0.150634 | 0.01267 | Uiso | 1 |
| C130 | C | 0.29750 | 0.33347 | 0.50048 | 0.106572  | 0.01267 | Uiso | 1 |
| C131 | C | 0.24720 | 0.35279 | 0.52848 | -0.146877 | 0.01267 | Uiso | 1 |
| C132 | C | 0.46070 | 0.35159 | 0.50300 | -0.184436 | 0.01267 | Uiso | 1 |
| C133 | C | 0.35810 | 0.49774 | 0.80652 | -0.061917 | 0.01267 | Uiso | 1 |
| C134 | C | 0.43540 | 0.49713 | 0.81608 | 0.174844  | 0.01267 | Uiso | 1 |
| C135 | C | 0.19190 | 0.47335 | 0.84981 | -0.098825 | 0.01267 | Uiso | 1 |
| C136 | C | 0.25360 | 0.50031 | 0.76585 | -0.178883 | 0.01267 | Uiso | 1 |
| C137 | C | 0.18760 | 0.50408 | 0.88338 | -0.042372 | 0.01267 | Uiso | 1 |
| C138 | C | 0.13140 | 0.50640 | 0.91232 | 0.665667  | 0.01267 | Uiso | 1 |
| C139 | C | 0.23810 | 0.53299 | 0.89221 | -0.112451 | 0.01267 | Uiso | 1 |
| C140 | C | 0.33340 | 0.49742 | 0.77513 | 0.176660  | 0.01267 | Uiso | 1 |
| C141 | C | 0.29130 | 0.53009 | 0.86604 | -0.150781 | 0.01267 | Uiso | 1 |
| C142 | C | 0.29750 | 0.49952 | 0.83299 | 0.106571  | 0.01267 | Uiso | 1 |
| C143 | C | 0.24720 | 0.47152 | 0.82431 | -0.147217 | 0.01267 | Uiso | 1 |
| C144 | C | 0.46070 | 0.49700 | 0.84859 | -0.182096 | 0.01267 | Uiso | 1 |
| C145 | C | 0.35810 | 0.50226 | 0.30878 | -0.062120 | 0.01267 | Uiso | 1 |
| C146 | C | 0.43540 | 0.50287 | 0.31895 | 0.174130  | 0.01267 | Uiso | 1 |
| C147 | C | 0.19190 | 0.52665 | 0.37646 | -0.098841 | 0.01267 | Uiso | 1 |
| C148 | C | 0.25360 | 0.49969 | 0.26554 | -0.179209 | 0.01267 | Uiso | 1 |
| C149 | C | 0.18760 | 0.49592 | 0.37930 | -0.043039 | 0.01267 | Uiso | 1 |
| C150 | C | 0.13140 | 0.49360 | 0.40592 | 0.666701  | 0.01267 | Uiso | 1 |
| C151 | C | 0.23810 | 0.46701 | 0.35922 | -0.112121 | 0.01267 | Uiso | 1 |
| C152 | C | 0.33340 | 0.50258 | 0.27771 | 0.176107  | 0.01267 | Uiso | 1 |
| C153 | C | 0.29130 | 0.46991 | 0.33595 | -0.150997 | 0.01267 | Uiso | 1 |
| C154 | C | 0.29750 | 0.50048 | 0.33347 | 0.106887  | 0.01267 | Uiso | 1 |
| C155 | C | 0.24720 | 0.52848 | 0.35279 | -0.146857 | 0.01267 | Uiso | 1 |
| C156 | C | 0.46070 | 0.50300 | 0.35159 | -0.182209 | 0.01267 | Uiso | 1 |
| C157 | C | 0.35810 | 0.80652 | 0.49774 | -0.062006 | 0.01267 | Uiso | 1 |
| C158 | C | 0.43540 | 0.81608 | 0.49713 | 0.174766  | 0.01267 | Uiso | 1 |
| C159 | C | 0.19190 | 0.84981 | 0.47335 | -0.098632 | 0.01267 | Uiso | 1 |
| C160 | C | 0.25360 | 0.76585 | 0.50031 | -0.179137 | 0.01267 | Uiso | 1 |
| C161 | C | 0.18760 | 0.88338 | 0.50408 | -0.042901 | 0.01267 | Uiso | 1 |
| C162 | C | 0.13140 | 0.91232 | 0.50640 | 0.665966  | 0.01267 | Uiso | 1 |
| C163 | C | 0.23810 | 0.89221 | 0.53299 | -0.112252 | 0.01267 | Uiso | 1 |
| C164 | C | 0.33340 | 0.77513 | 0.49742 | 0.176201  | 0.01267 | Uiso | 1 |
| C165 | C | 0.29130 | 0.86604 | 0.53009 | -0.150993 | 0.01267 | Uiso | 1 |
| C166 | C | 0.29750 | 0.83299 | 0.49952 | 0.106868  | 0.01267 | Uiso | 1 |
| C167 | C | 0.24720 | 0.82431 | 0.47152 | -0.147228 | 0.01267 | Uiso | 1 |
| C168 | C | 0.46070 | 0.84859 | 0.49700 | -0.182765 | 0.01267 | Uiso | 1 |
| C169 | C | 0.35810 | 0.69122 | 0.19348 | -0.062401 | 0.01267 | Uiso | 1 |
| C170 | C | 0.43540 | 0.68105 | 0.18392 | 0.175062  | 0.01267 | Uiso | 1 |

|      |   |         |         |         |           |         |      |   |
|------|---|---------|---------|---------|-----------|---------|------|---|
| C171 | C | 0.19190 | 0.62354 | 0.15019 | -0.098520 | 0.01267 | Uiso | 1 |
| C172 | C | 0.25360 | 0.73446 | 0.23415 | -0.179759 | 0.01267 | Uiso | 1 |
| C173 | C | 0.18760 | 0.62070 | 0.11662 | -0.042794 | 0.01267 | Uiso | 1 |
| C174 | C | 0.13140 | 0.59408 | 0.08768 | 0.665728  | 0.01267 | Uiso | 1 |
| C175 | C | 0.23810 | 0.64078 | 0.10779 | -0.112308 | 0.01267 | Uiso | 1 |
| C176 | C | 0.33340 | 0.72229 | 0.22487 | 0.176673  | 0.01267 | Uiso | 1 |
| C177 | C | 0.29130 | 0.66405 | 0.13396 | -0.150842 | 0.01267 | Uiso | 1 |
| C178 | C | 0.29750 | 0.66653 | 0.16701 | 0.107018  | 0.01267 | Uiso | 1 |
| C179 | C | 0.24720 | 0.64721 | 0.17569 | -0.147027 | 0.01267 | Uiso | 1 |
| C180 | C | 0.46070 | 0.64841 | 0.15141 | -0.183073 | 0.01267 | Uiso | 1 |
| C181 | C | 0.35810 | 0.49774 | 0.69122 | -0.061895 | 0.01267 | Uiso | 1 |
| C182 | C | 0.43540 | 0.49713 | 0.68105 | 0.175555  | 0.01267 | Uiso | 1 |
| C183 | C | 0.19190 | 0.47335 | 0.62354 | -0.098435 | 0.01267 | Uiso | 1 |
| C184 | C | 0.25360 | 0.50031 | 0.73446 | -0.180175 | 0.01267 | Uiso | 1 |
| C185 | C | 0.18760 | 0.50408 | 0.62070 | -0.043315 | 0.01267 | Uiso | 1 |
| C186 | C | 0.13140 | 0.50640 | 0.59408 | 0.667075  | 0.01267 | Uiso | 1 |
| C187 | C | 0.23810 | 0.53299 | 0.64078 | -0.112105 | 0.01267 | Uiso | 1 |
| C188 | C | 0.33340 | 0.49742 | 0.72229 | 0.177293  | 0.01267 | Uiso | 1 |
| C189 | C | 0.29130 | 0.53009 | 0.66405 | -0.150688 | 0.01267 | Uiso | 1 |
| C190 | C | 0.29750 | 0.49952 | 0.66653 | 0.106391  | 0.01267 | Uiso | 1 |
| C191 | C | 0.24720 | 0.47152 | 0.64721 | -0.146793 | 0.01267 | Uiso | 1 |
| C192 | C | 0.46070 | 0.49700 | 0.64841 | -0.183329 | 0.01267 | Uiso | 1 |
| C193 | C | 0.35810 | 0.19348 | 0.50226 | -0.061934 | 0.01267 | Uiso | 1 |
| C194 | C | 0.43540 | 0.18392 | 0.50287 | 0.174128  | 0.01267 | Uiso | 1 |
| C195 | C | 0.19190 | 0.15019 | 0.52665 | -0.098589 | 0.01267 | Uiso | 1 |
| C196 | C | 0.25360 | 0.23415 | 0.49969 | -0.178631 | 0.01267 | Uiso | 1 |
| C197 | C | 0.18760 | 0.11662 | 0.49592 | -0.042675 | 0.01267 | Uiso | 1 |
| C198 | C | 0.13140 | 0.08768 | 0.49360 | 0.665751  | 0.01267 | Uiso | 1 |
| C199 | C | 0.23810 | 0.10779 | 0.46701 | -0.112392 | 0.01267 | Uiso | 1 |
| C200 | C | 0.33340 | 0.22487 | 0.50258 | 0.175839  | 0.01267 | Uiso | 1 |
| C201 | C | 0.29130 | 0.13396 | 0.46991 | -0.150848 | 0.01267 | Uiso | 1 |
| C202 | C | 0.29750 | 0.16701 | 0.50048 | 0.106821  | 0.01267 | Uiso | 1 |
| C203 | C | 0.24720 | 0.17569 | 0.52848 | -0.147524 | 0.01267 | Uiso | 1 |
| C204 | C | 0.46070 | 0.15141 | 0.50300 | -0.181835 | 0.01267 | Uiso | 1 |
| C205 | C | 0.35810 | 0.30878 | 0.80652 | -0.061738 | 0.01267 | Uiso | 1 |
| C206 | C | 0.43540 | 0.31895 | 0.81608 | 0.174036  | 0.01267 | Uiso | 1 |
| C207 | C | 0.19190 | 0.37646 | 0.84981 | -0.098893 | 0.01267 | Uiso | 1 |
| C208 | C | 0.25360 | 0.26554 | 0.76585 | -0.179172 | 0.01267 | Uiso | 1 |
| C209 | C | 0.18760 | 0.37930 | 0.88338 | -0.042625 | 0.01267 | Uiso | 1 |
| C210 | C | 0.13140 | 0.40592 | 0.91232 | 0.665540  | 0.01267 | Uiso | 1 |
| C211 | C | 0.23810 | 0.35922 | 0.89221 | -0.111814 | 0.01267 | Uiso | 1 |
| C212 | C | 0.33340 | 0.27771 | 0.77513 | 0.176474  | 0.01267 | Uiso | 1 |
| C213 | C | 0.29130 | 0.33595 | 0.86604 | -0.150868 | 0.01267 | Uiso | 1 |
| C214 | C | 0.29750 | 0.33347 | 0.83299 | 0.106435  | 0.01267 | Uiso | 1 |
| C215 | C | 0.24720 | 0.35279 | 0.82431 | -0.146990 | 0.01267 | Uiso | 1 |
| C216 | C | 0.46070 | 0.35159 | 0.84859 | -0.181843 | 0.01267 | Uiso | 1 |
| C217 | C | 0.64190 | 0.19348 | 0.69122 | -0.061723 | 0.01267 | Uiso | 1 |
| C218 | C | 0.56460 | 0.18392 | 0.68105 | 0.174102  | 0.01267 | Uiso | 1 |
| C219 | C | 0.80810 | 0.15019 | 0.62354 | -0.098639 | 0.01267 | Uiso | 1 |
| C220 | C | 0.74640 | 0.23415 | 0.73446 | -0.179179 | 0.01267 | Uiso | 1 |
| C221 | C | 0.81240 | 0.11662 | 0.62070 | -0.042827 | 0.01267 | Uiso | 1 |
| C222 | C | 0.86860 | 0.08768 | 0.59408 | 0.665657  | 0.01267 | Uiso | 1 |

|      |   |         |         |         |           |         |      |   |
|------|---|---------|---------|---------|-----------|---------|------|---|
| C223 | C | 0.76190 | 0.10779 | 0.64078 | -0.111867 | 0.01267 | Uiso | 1 |
| C224 | C | 0.66660 | 0.22487 | 0.72229 | 0.176403  | 0.01267 | Uiso | 1 |
| C225 | C | 0.70870 | 0.13396 | 0.66405 | -0.150854 | 0.01267 | Uiso | 1 |
| C226 | C | 0.70250 | 0.16701 | 0.66653 | 0.106343  | 0.01267 | Uiso | 1 |
| C227 | C | 0.75280 | 0.17569 | 0.64721 | -0.146792 | 0.01267 | Uiso | 1 |
| C228 | C | 0.53930 | 0.15141 | 0.64841 | -0.181633 | 0.01267 | Uiso | 1 |
| C229 | C | 0.64190 | 0.30878 | 0.50226 | -0.061645 | 0.01267 | Uiso | 1 |
| C230 | C | 0.56460 | 0.31895 | 0.50287 | 0.173893  | 0.01267 | Uiso | 1 |
| C231 | C | 0.80810 | 0.37646 | 0.52665 | -0.098657 | 0.01267 | Uiso | 1 |
| C232 | C | 0.74640 | 0.26554 | 0.49969 | -0.178492 | 0.01267 | Uiso | 1 |
| C233 | C | 0.81240 | 0.37930 | 0.49592 | -0.043253 | 0.01267 | Uiso | 1 |
| C234 | C | 0.86860 | 0.40592 | 0.49360 | 0.666951  | 0.01267 | Uiso | 1 |
| C235 | C | 0.76190 | 0.35922 | 0.46701 | -0.112195 | 0.01267 | Uiso | 1 |
| C236 | C | 0.66660 | 0.27771 | 0.50258 | 0.175592  | 0.01267 | Uiso | 1 |
| C237 | C | 0.70870 | 0.33595 | 0.46991 | -0.150657 | 0.01267 | Uiso | 1 |
| C238 | C | 0.70250 | 0.33347 | 0.50048 | 0.106503  | 0.01267 | Uiso | 1 |
| C239 | C | 0.75280 | 0.35279 | 0.52848 | -0.146966 | 0.01267 | Uiso | 1 |
| C240 | C | 0.53930 | 0.35159 | 0.50300 | -0.181910 | 0.01267 | Uiso | 1 |
| C241 | C | 0.64190 | 0.49774 | 0.80652 | -0.062346 | 0.01267 | Uiso | 1 |
| C242 | C | 0.56460 | 0.49713 | 0.81608 | 0.176024  | 0.01267 | Uiso | 1 |
| C243 | C | 0.80810 | 0.47335 | 0.84981 | -0.098883 | 0.01267 | Uiso | 1 |
| C244 | C | 0.74640 | 0.50031 | 0.76585 | -0.179825 | 0.01267 | Uiso | 1 |
| C245 | C | 0.81240 | 0.50408 | 0.88338 | -0.042353 | 0.01267 | Uiso | 1 |
| C246 | C | 0.86860 | 0.50640 | 0.91232 | 0.665634  | 0.01267 | Uiso | 1 |
| C247 | C | 0.76190 | 0.53299 | 0.89221 | -0.112437 | 0.01267 | Uiso | 1 |
| C248 | C | 0.66660 | 0.49742 | 0.77513 | 0.177711  | 0.01267 | Uiso | 1 |
| C249 | C | 0.70870 | 0.53009 | 0.86604 | -0.150807 | 0.01267 | Uiso | 1 |
| C250 | C | 0.70250 | 0.49952 | 0.83299 | 0.106628  | 0.01267 | Uiso | 1 |
| C251 | C | 0.75280 | 0.47152 | 0.82431 | -0.147224 | 0.01267 | Uiso | 1 |
| C252 | C | 0.53930 | 0.49700 | 0.84859 | -0.183246 | 0.01267 | Uiso | 1 |
| C253 | C | 0.64190 | 0.80652 | 0.30878 | -0.062255 | 0.01267 | Uiso | 1 |
| C254 | C | 0.56460 | 0.81608 | 0.31895 | 0.174943  | 0.01267 | Uiso | 1 |
| C255 | C | 0.80810 | 0.84981 | 0.37646 | -0.098637 | 0.01267 | Uiso | 1 |
| C256 | C | 0.74640 | 0.76585 | 0.26554 | -0.179655 | 0.01267 | Uiso | 1 |
| C257 | C | 0.81240 | 0.88338 | 0.37930 | -0.042904 | 0.01267 | Uiso | 1 |
| C258 | C | 0.86860 | 0.91232 | 0.40592 | 0.665918  | 0.01267 | Uiso | 1 |
| C259 | C | 0.76190 | 0.89221 | 0.35922 | -0.112406 | 0.01267 | Uiso | 1 |
| C260 | C | 0.66660 | 0.77513 | 0.27771 | 0.176598  | 0.01267 | Uiso | 1 |
| C261 | C | 0.70870 | 0.86604 | 0.33595 | -0.150471 | 0.01267 | Uiso | 1 |
| C262 | C | 0.70250 | 0.83299 | 0.33347 | 0.106616  | 0.01267 | Uiso | 1 |
| C263 | C | 0.75280 | 0.82431 | 0.35279 | -0.146750 | 0.01267 | Uiso | 1 |
| C264 | C | 0.53930 | 0.84859 | 0.35159 | -0.183040 | 0.01267 | Uiso | 1 |
| C265 | C | 0.64190 | 0.69122 | 0.49774 | -0.062069 | 0.01267 | Uiso | 1 |
| C266 | C | 0.56460 | 0.68105 | 0.49713 | 0.175020  | 0.01267 | Uiso | 1 |
| C267 | C | 0.80810 | 0.62354 | 0.47335 | -0.098695 | 0.01267 | Uiso | 1 |
| C268 | C | 0.74640 | 0.73446 | 0.50031 | -0.178899 | 0.01267 | Uiso | 1 |
| C269 | C | 0.81240 | 0.62070 | 0.50408 | -0.043098 | 0.01267 | Uiso | 1 |
| C270 | C | 0.86860 | 0.59408 | 0.50640 | 0.666695  | 0.01267 | Uiso | 1 |
| C271 | C | 0.76190 | 0.64078 | 0.53299 | -0.112052 | 0.01267 | Uiso | 1 |
| C272 | C | 0.66660 | 0.72229 | 0.49742 | 0.176432  | 0.01267 | Uiso | 1 |
| C273 | C | 0.70870 | 0.66405 | 0.53009 | -0.151050 | 0.01267 | Uiso | 1 |
| C274 | C | 0.70250 | 0.66653 | 0.49952 | 0.106711  | 0.01267 | Uiso | 1 |

|      |    |         |         |         |           |         |      |   |
|------|----|---------|---------|---------|-----------|---------|------|---|
| C275 | C  | 0.75280 | 0.64721 | 0.47152 | -0.146881 | 0.01267 | Uiso | 1 |
| C276 | C  | 0.53930 | 0.64841 | 0.49700 | -0.182654 | 0.01267 | Uiso | 1 |
| C277 | C  | 0.64190 | 0.50226 | 0.19348 | -0.062221 | 0.01267 | Uiso | 1 |
| C278 | C  | 0.56460 | 0.50287 | 0.18392 | 0.173870  | 0.01267 | Uiso | 1 |
| C279 | C  | 0.80810 | 0.52665 | 0.15019 | -0.098611 | 0.01267 | Uiso | 1 |
| C280 | C  | 0.74640 | 0.49969 | 0.23415 | -0.179164 | 0.01267 | Uiso | 1 |
| C281 | C  | 0.81240 | 0.49592 | 0.11662 | -0.042892 | 0.01267 | Uiso | 1 |
| C282 | C  | 0.86860 | 0.49360 | 0.08768 | 0.665810  | 0.01267 | Uiso | 1 |
| C283 | C  | 0.76190 | 0.46701 | 0.10779 | -0.112457 | 0.01267 | Uiso | 1 |
| C284 | C  | 0.66660 | 0.50258 | 0.22487 | 0.176030  | 0.01267 | Uiso | 1 |
| C285 | C  | 0.70870 | 0.46991 | 0.13396 | -0.150988 | 0.01267 | Uiso | 1 |
| C286 | C  | 0.70250 | 0.50048 | 0.16701 | 0.107110  | 0.01267 | Uiso | 1 |
| C287 | C  | 0.75280 | 0.52848 | 0.17569 | -0.147261 | 0.01267 | Uiso | 1 |
| C288 | C  | 0.53930 | 0.50300 | 0.15141 | -0.181924 | 0.01267 | Uiso | 1 |
| N1   | N  | 0.61760 | 0.49595 | 0.74798 | -0.298803 | 0.01267 | Uiso | 1 |
| N2   | N  | 0.61760 | 0.25203 | 0.50406 | -0.298388 | 0.01267 | Uiso | 1 |
| N3   | N  | 0.61760 | 0.25202 | 0.74797 | -0.299276 | 0.01267 | Uiso | 1 |
| N4   | N  | 0.61760 | 0.50405 | 0.25202 | -0.298898 | 0.01267 | Uiso | 1 |
| N5   | N  | 0.61760 | 0.74797 | 0.49595 | -0.298003 | 0.01267 | Uiso | 1 |
| N6   | N  | 0.61760 | 0.74797 | 0.25202 | -0.298615 | 0.01267 | Uiso | 1 |
| N7   | N  | 0.38240 | 0.74797 | 0.25202 | -0.298565 | 0.01267 | Uiso | 1 |
| N8   | N  | 0.38240 | 0.74797 | 0.49595 | -0.297965 | 0.01267 | Uiso | 1 |
| N9   | N  | 0.38240 | 0.50405 | 0.25203 | -0.298861 | 0.01267 | Uiso | 1 |
| N10  | N  | 0.38240 | 0.25203 | 0.74798 | -0.299182 | 0.01267 | Uiso | 1 |
| N11  | N  | 0.38240 | 0.25202 | 0.50405 | -0.298320 | 0.01267 | Uiso | 1 |
| N12  | N  | 0.38240 | 0.49595 | 0.74798 | -0.298717 | 0.01267 | Uiso | 1 |
| N13  | N  | 0.50000 | 0.49707 | 0.70139 | -0.300848 | 0.01267 | Uiso | 1 |
| N14  | N  | 0.50000 | 0.20432 | 0.50293 | -0.302411 | 0.01267 | Uiso | 1 |
| N15  | N  | 0.50000 | 0.29861 | 0.79568 | -0.301130 | 0.01267 | Uiso | 1 |
| N16  | N  | 0.50000 | 0.50293 | 0.29861 | -0.301357 | 0.01267 | Uiso | 1 |
| N17  | N  | 0.50000 | 0.79568 | 0.49707 | -0.302103 | 0.01267 | Uiso | 1 |
| N18  | N  | 0.50000 | 0.70139 | 0.20432 | -0.302513 | 0.01267 | Uiso | 1 |
| N19  | N  | 0.50000 | 0.79568 | 0.29861 | -0.302479 | 0.01267 | Uiso | 1 |
| N20  | N  | 0.50000 | 0.70139 | 0.49707 | -0.302636 | 0.01267 | Uiso | 1 |
| N21  | N  | 0.50000 | 0.50293 | 0.20432 | -0.301081 | 0.01267 | Uiso | 1 |
| N22  | N  | 0.50000 | 0.20432 | 0.70139 | -0.301020 | 0.01267 | Uiso | 1 |
| N23  | N  | 0.50000 | 0.29861 | 0.50293 | -0.301682 | 0.01267 | Uiso | 1 |
| N24  | N  | 0.50000 | 0.49707 | 0.79568 | -0.302245 | 0.01267 | Uiso | 1 |
| Cl1  | Cl | 0.50000 | 0.42296 | 0.71148 | -0.307829 | 0.01267 | Uiso | 1 |
| Cl2  | Cl | 0.50000 | 0.28852 | 0.57704 | -0.308975 | 0.01267 | Uiso | 1 |
| Cl3  | Cl | 0.50000 | 0.28852 | 0.71148 | -0.308174 | 0.01267 | Uiso | 1 |
| Cl4  | Cl | 0.50000 | 0.57704 | 0.28852 | -0.309629 | 0.01267 | Uiso | 1 |
| Cl5  | Cl | 0.50000 | 0.71148 | 0.42296 | -0.308376 | 0.01267 | Uiso | 1 |
| Cl6  | Cl | 0.50000 | 0.71148 | 0.28852 | -0.309128 | 0.01267 | Uiso | 1 |
| O1   | O  | 0.92108 | 0.48240 | 0.58113 | -0.587981 | 0.01267 | Uiso | 1 |
| O2   | O  | 0.85652 | 0.53095 | 0.58627 | -0.660042 | 0.01267 | Uiso | 1 |
| O3   | O  | 0.92108 | 0.09873 | 0.51760 | -0.587842 | 0.01267 | Uiso | 1 |
| O4   | O  | 0.85652 | 0.05532 | 0.46905 | -0.659372 | 0.01267 | Uiso | 1 |
| O5   | O  | 0.92108 | 0.41887 | 0.90127 | -0.588203 | 0.01267 | Uiso | 1 |
| O6   | O  | 0.85652 | 0.41373 | 0.94468 | -0.658730 | 0.01267 | Uiso | 1 |
| O7   | O  | 0.92108 | 0.51760 | 0.41887 | -0.588374 | 0.01267 | Uiso | 1 |
| O8   | O  | 0.85652 | 0.46905 | 0.41373 | -0.659412 | 0.01267 | Uiso | 1 |

|     |   |         |         |         |           |         |      |   |
|-----|---|---------|---------|---------|-----------|---------|------|---|
| O9  | O | 0.92108 | 0.90127 | 0.48240 | -0.587758 | 0.01267 | Uiso | 1 |
| O10 | O | 0.85652 | 0.94468 | 0.53095 | -0.659649 | 0.01267 | Uiso | 1 |
| O11 | O | 0.92108 | 0.58113 | 0.09873 | -0.587651 | 0.01267 | Uiso | 1 |
| O12 | O | 0.85652 | 0.58627 | 0.05532 | -0.659552 | 0.01267 | Uiso | 1 |
| O13 | O | 0.07892 | 0.90127 | 0.41887 | -0.587680 | 0.01267 | Uiso | 1 |
| O14 | O | 0.14348 | 0.94468 | 0.41373 | -0.659843 | 0.01267 | Uiso | 1 |
| O15 | O | 0.07892 | 0.58113 | 0.48240 | -0.588116 | 0.01267 | Uiso | 1 |
| O16 | O | 0.14348 | 0.58627 | 0.53095 | -0.658979 | 0.01267 | Uiso | 1 |
| O17 | O | 0.07892 | 0.51760 | 0.09873 | -0.587773 | 0.01267 | Uiso | 1 |
| O18 | O | 0.14348 | 0.46905 | 0.05532 | -0.659608 | 0.01267 | Uiso | 1 |
| O19 | O | 0.07892 | 0.09873 | 0.58113 | -0.587982 | 0.01267 | Uiso | 1 |
| O20 | O | 0.14348 | 0.05532 | 0.58627 | -0.659052 | 0.01267 | Uiso | 1 |
| O21 | O | 0.07892 | 0.41887 | 0.51760 | -0.588183 | 0.01267 | Uiso | 1 |
| O22 | O | 0.14348 | 0.41373 | 0.46905 | -0.660054 | 0.01267 | Uiso | 1 |
| O23 | O | 0.07892 | 0.48240 | 0.90127 | -0.588014 | 0.01267 | Uiso | 1 |
| O24 | O | 0.14348 | 0.53095 | 0.94468 | -0.659194 | 0.01267 | Uiso | 1 |
| O25 | O | 0.07892 | 0.51760 | 0.41887 | -0.588434 | 0.01267 | Uiso | 1 |
| O26 | O | 0.14348 | 0.46905 | 0.41373 | -0.659374 | 0.01267 | Uiso | 1 |
| O27 | O | 0.07892 | 0.90127 | 0.48240 | -0.587855 | 0.01267 | Uiso | 1 |
| O28 | O | 0.14348 | 0.94468 | 0.53095 | -0.659614 | 0.01267 | Uiso | 1 |
| O29 | O | 0.07892 | 0.58113 | 0.09873 | -0.587753 | 0.01267 | Uiso | 1 |
| O30 | O | 0.14348 | 0.58627 | 0.05532 | -0.659614 | 0.01267 | Uiso | 1 |
| O31 | O | 0.07892 | 0.48240 | 0.58113 | -0.588127 | 0.01267 | Uiso | 1 |
| O32 | O | 0.14348 | 0.53095 | 0.58627 | -0.660029 | 0.01267 | Uiso | 1 |
| O33 | O | 0.07892 | 0.09873 | 0.51760 | -0.587891 | 0.01267 | Uiso | 1 |
| O34 | O | 0.14348 | 0.05532 | 0.46905 | -0.659335 | 0.01267 | Uiso | 1 |
| O35 | O | 0.07892 | 0.41887 | 0.90127 | -0.588271 | 0.01267 | Uiso | 1 |
| O36 | O | 0.14348 | 0.41373 | 0.94468 | -0.658734 | 0.01267 | Uiso | 1 |
| O37 | O | 0.92108 | 0.09873 | 0.58113 | -0.587886 | 0.01267 | Uiso | 1 |
| O38 | O | 0.85652 | 0.05532 | 0.58627 | -0.659104 | 0.01267 | Uiso | 1 |
| O39 | O | 0.92108 | 0.41887 | 0.51760 | -0.588014 | 0.01267 | Uiso | 1 |
| O40 | O | 0.85652 | 0.41373 | 0.46905 | -0.660027 | 0.01267 | Uiso | 1 |
| O41 | O | 0.92108 | 0.48240 | 0.90127 | -0.587942 | 0.01267 | Uiso | 1 |
| O42 | O | 0.85652 | 0.53095 | 0.94468 | -0.659174 | 0.01267 | Uiso | 1 |
| O43 | O | 0.92108 | 0.90127 | 0.41887 | -0.587602 | 0.01267 | Uiso | 1 |
| O44 | O | 0.85652 | 0.94468 | 0.41373 | -0.659838 | 0.01267 | Uiso | 1 |
| O45 | O | 0.92108 | 0.58113 | 0.48240 | -0.588390 | 0.01267 | Uiso | 1 |
| O46 | O | 0.85652 | 0.58627 | 0.53095 | -0.659291 | 0.01267 | Uiso | 1 |
| O47 | O | 0.92108 | 0.51760 | 0.09873 | -0.587670 | 0.01267 | Uiso | 1 |
| O48 | O | 0.85652 | 0.46905 | 0.05532 | -0.659590 | 0.01267 | Uiso | 1 |
| O49 | O | 0.89690 | 0.48356 | 0.51645 | -1.156419 | 0.01267 | Uiso | 1 |
| O50 | O | 0.89690 | 0.03289 | 0.51645 | -1.156645 | 0.01267 | Uiso | 1 |
| O51 | O | 0.89690 | 0.48356 | 0.96712 | -1.156355 | 0.01267 | Uiso | 1 |
| O52 | O | 0.89690 | 0.51644 | 0.48355 | -1.156613 | 0.01267 | Uiso | 1 |
| O53 | O | 0.89690 | 0.96711 | 0.48355 | -1.156251 | 0.01267 | Uiso | 1 |
| O54 | O | 0.89690 | 0.51644 | 0.03289 | -1.156273 | 0.01267 | Uiso | 1 |
| O55 | O | 0.10310 | 0.96711 | 0.48355 | -1.156221 | 0.01267 | Uiso | 1 |
| O56 | O | 0.10310 | 0.51644 | 0.48355 | -1.156618 | 0.01267 | Uiso | 1 |
| O57 | O | 0.10310 | 0.51644 | 0.03288 | -1.156282 | 0.01267 | Uiso | 1 |
| O58 | O | 0.10310 | 0.03289 | 0.51645 | -1.156537 | 0.01267 | Uiso | 1 |
| O59 | O | 0.10310 | 0.48356 | 0.51645 | -1.156382 | 0.01267 | Uiso | 1 |
| O60 | O | 0.10310 | 0.48356 | 0.96712 | -1.156363 | 0.01267 | Uiso | 1 |

|     |   |         |         |         |           |         |      |   |
|-----|---|---------|---------|---------|-----------|---------|------|---|
| O61 | O | 0.00000 | 0.52596 | 0.55981 | -1.154028 | 0.01267 | Uiso | 1 |
| O62 | O | 0.00000 | 0.03385 | 0.47404 | -1.154448 | 0.01267 | Uiso | 1 |
| O63 | O | 0.00000 | 0.44019 | 0.96615 | -1.153948 | 0.01267 | Uiso | 1 |
| O64 | O | 0.00000 | 0.47404 | 0.44019 | -1.154169 | 0.01267 | Uiso | 1 |
| O65 | O | 0.00000 | 0.96615 | 0.52596 | -1.153993 | 0.01267 | Uiso | 1 |
| O66 | O | 0.00000 | 0.55981 | 0.03385 | -1.154141 | 0.01267 | Uiso | 1 |
| O67 | O | 0.00000 | 0.96615 | 0.44019 | -1.154195 | 0.01267 | Uiso | 1 |
| O68 | O | 0.00000 | 0.55981 | 0.52596 | -1.154288 | 0.01267 | Uiso | 1 |
| O69 | O | 0.00000 | 0.47404 | 0.03385 | -1.154168 | 0.01267 | Uiso | 1 |
| O70 | O | 0.00000 | 0.03385 | 0.55981 | -1.154072 | 0.01267 | Uiso | 1 |
| O71 | O | 0.00000 | 0.44019 | 0.47404 | -1.154212 | 0.01267 | Uiso | 1 |
| O72 | O | 0.00000 | 0.52596 | 0.96615 | -1.154604 | 0.01267 | Uiso | 1 |

data\_BIPSUQ\_CLEAN

\_cell\_length\_a 33.7831

\_cell\_length\_b 33.7831

\_cell\_length\_c 43.456

\_cell\_angle\_alpha 90

\_cell\_angle\_beta 90

\_cell\_angle\_gamma 120

\_symmetry\_space\_group\_name\_H-M "P 1"

\_symmetry\_int\_tables\_number 1

loop\_

\_symmetry\_equiv\_pos\_as\_xyz

'x, y, z'

loop\_

\_atom\_site\_label

\_atom\_site\_occupancy

\_atom\_site\_fract\_x

\_atom\_site\_fract\_y

\_atom\_site\_fract\_z

\_atom\_site\_thermal\_displace\_type

\_atom\_site\_B\_iso\_or\_equiv

\_atom\_site\_type\_symbol

\_atom\_site\_charge

|     |   |         |         |         |      |   |   |           |
|-----|---|---------|---------|---------|------|---|---|-----------|
| O1  | 1 | 0.45037 | 0.46784 | 0.5384  | Biso | 1 | O | -0.524567 |
| O2  | 1 | 0.4865  | 0.4308  | 0.52048 | Biso | 1 | O | -0.495966 |
| O3  | 1 | 0.4365  | 0.2773  | 0.55961 | Biso | 1 | O | -0.537765 |
| O4  | 1 | 0.387   | 0.2498  | 0.59758 | Biso | 1 | O | -0.571474 |
| C1  | 1 | 0.262   | 0.3826  | 0.6951  | Biso | 1 | C | -0.097678 |
| C2  | 1 | 0.2246  | 0.384   | 0.685   | Biso | 1 | C | 0.177209  |
| C3  | 1 | 0.37911 | 0.3669  | 0.60166 | Biso | 1 | C | 0.069155  |
| C4  | 1 | 0.3817  | 0.3271  | 0.60067 | Biso | 1 | C | -0.147816 |
| H1  | 1 | 0.3645  | 0.3032  | 0.6145  | Biso | 1 | H | 0.135058  |
| C5  | 1 | 0.4098  | 0.3228  | 0.57922 | Biso | 1 | C | -0.011709 |
| C6  | 1 | 0.43533 | 0.3582  | 0.55877 | Biso | 1 | C | -0.1171   |
| H2  | 1 | 0.4543  | 0.3552  | 0.5443  | Biso | 1 | H | 0.141012  |
| C7  | 1 | 0.43271 | 0.3979  | 0.55976 | Biso | 1 | C | -0.002744 |
| C8  | 1 | 0.4046  | 0.4023  | 0.58121 | Biso | 1 | C | -0.150749 |
| H3  | 1 | 0.4028  | 0.4291  | 0.5819  | Biso | 1 | H | 0.134328  |
| C9  | 1 | 0.2114  | 0.3833  | 0.65244 | Biso | 1 | C | -0.17381  |
| H4  | 1 | 0.2278  | 0.383   | 0.635   | Biso | 1 | H | 0.142104  |
| C10 | 1 | 0.3156  | 0.3828  | 0.73437 | Biso | 1 | C | -0.186395 |
| H5  | 1 | 0.3375  | 0.3827  | 0.7212  | Biso | 1 | H | 0.144546  |
| C11 | 1 | 0.2743  | 0.383   | 0.7259  | Biso | 1 | C | 0.187222  |
| C12 | 1 | 0.4589  | 0.4355  | 0.5369  | Biso | 1 | C | 0.581495  |
| C13 | 1 | 0.4109  | 0.2825  | 0.5782  | Biso | 1 | C | 0.604338  |
| C14 | 1 | 0.2926  | 0.3788  | 0.66932 | Biso | 1 | C | 0.091375  |
| C15 | 1 | 0.3342  | 0.4164  | 0.66129 | Biso | 1 | C | -0.14763  |
| H6  | 1 | 0.3438  | 0.4449  | 0.6707  | Biso | 1 | H | 0.122658  |
| C16 | 1 | 0.3618  | 0.412   | 0.6394  | Biso | 1 | C | -0.146823 |

|     |   |         |         |         |         |      |   |           |           |
|-----|---|---------|---------|---------|---------|------|---|-----------|-----------|
| H7  | 1 | 0.3899  | 0.4375  | 0.6339  | Biso    | 1    | H | 0.122999  |           |
| C17 | 1 | 0.3476  | 0.37    | 0.62547 | Biso    | 1    | C | 0.065034  |           |
| C18 | 1 | 0.3059  | 0.3323  | 0.63351 | Biso    | 1    | C | -0.144272 |           |
| H8  | 1 | 0.2963  | 0.3039  | 0.6241  | Biso    | 1    | H | 0.125639  |           |
| C19 | 1 | 0.27839 |         | 0.3367  | 0.65543 | Biso | 1 | C         | -0.147118 |
| H9  | 1 | 0.2502  | 0.3112  | 0.6609  | Biso    | 1    | H | 0.125424  |           |
| O5  | 1 | 0.53216 |         | 0.98253 | 0.5384  | Biso | 1 | O         | -0.524067 |
| O6  | 1 | 0.5692  | 0.0557  | 0.52048 | Biso    | 1    | O | -0.495523 |           |
| O7  | 1 | 0.7227  | 0.1592  | 0.55961 | Biso    | 1    | O | -0.53811  |           |
| O8  | 1 | 0.7502  | 0.1372  | 0.59758 | Biso    | 1    | O | -0.572391 |           |
| C20 | 1 | 0.6174  | 0.8794  | 0.6951  | Biso    | 1    | C | -0.097789 |           |
| C21 | 1 | 0.616   | 0.8406  | 0.685   | Biso    | 1    | C | 0.177314  |           |
| C22 | 1 | 0.6331  | 0.01221 |         | 0.60166 | Biso | 1 | C         | 0.069091  |
| C23 | 1 | 0.6729  | 0.0546  | 0.60067 | Biso    | 1    | C | -0.151908 |           |
| H10 | 1 | 0.6968  | 0.0613  | 0.6145  | Biso    | 1    | H | 0.137418  |           |
| C24 | 1 | 0.6772  | 0.087   | 0.57922 | Biso    | 1    | C | -0.01165  |           |
| C25 | 1 | 0.6418  | 0.07713 |         | 0.55877 | Biso | 1 | C         | -0.116753 |
| H11 | 1 | 0.6448  | 0.0991  | 0.5443  | Biso    | 1    | H | 0.141169  |           |
| C26 | 1 | 0.6021  | 0.03481 |         | 0.55976 | Biso | 1 | C         | -0.002776 |
| C27 | 1 | 0.5977  | 0.0023  | 0.58121 | Biso    | 1    | C | -0.151021 |           |
| H12 | 1 | 0.5709  | 0.9737  | 0.5819  | Biso    | 1    | H | 0.1348    |           |
| C28 | 1 | 0.6167  | 0.8281  | 0.65244 | Biso    | 1    | C | -0.174141 |           |
| H13 | 1 | 0.617   | 0.8448  | 0.635   | Biso    | 1    | H | 0.142097  |           |
| C29 | 1 | 0.6172  | 0.9328  | 0.73437 | Biso    | 1    | C | -0.186223 |           |
| H14 | 1 | 0.6173  | 0.9548  | 0.7212  | Biso    | 1    | H | 0.144198  |           |
| C30 | 1 | 0.617   | 0.8913  | 0.7259  | Biso    | 1    | C | 0.18705   |           |
| C31 | 1 | 0.5645  | 0.0234  | 0.5369  | Biso    | 1    | C | 0.581054  |           |
| C32 | 1 | 0.7175  | 0.1284  | 0.5782  | Biso    | 1    | C | 0.604883  |           |
| C33 | 1 | 0.6212  | 0.9138  | 0.66932 | Biso    | 1    | C | 0.091715  |           |
| C34 | 1 | 0.5836  | 0.9178  | 0.66129 | Biso    | 1    | C | -0.147546 |           |
| H15 | 1 | 0.5551  | 0.8989  | 0.6707  | Biso    | 1    | H | 0.122912  |           |
| C35 | 1 | 0.588   | 0.9498  | 0.6394  | Biso    | 1    | C | -0.146644 |           |
| H16 | 1 | 0.5625  | 0.9524  | 0.6339  | Biso    | 1    | H | 0.122945  |           |
| C36 | 1 | 0.63    | 0.9776  | 0.62547 | Biso    | 1    | C | 0.06499   |           |
| C37 | 1 | 0.6677  | 0.9736  | 0.63351 | Biso    | 1    | C | -0.1444   |           |
| H17 | 1 | 0.6961  | 0.9924  | 0.6241  | Biso    | 1    | H | 0.125537  |           |
| C38 | 1 | 0.6633  | 0.94169 |         | 0.65543 | Biso | 1 | C         | -0.147212 |
| H18 | 1 | 0.6888  | 0.939   | 0.6609  | Biso    | 1    | H | 0.125155  |           |
| O9  | 1 | 0.01747 |         | 0.54963 | 0.5384  | Biso | 1 | O         | -0.52464  |
| O10 | 1 | 0.9443  | 0.5135  | 0.52048 | Biso    | 1    | O | -0.495575 |           |
| O11 | 1 | 0.8408  | 0.5635  | 0.55961 | Biso    | 1    | O | -0.537749 |           |
| O12 | 1 | 0.8628  | 0.613   | 0.59758 | Biso    | 1    | O | -0.572251 |           |
| C39 | 1 | 0.1206  | 0.738   | 0.6951  | Biso    | 1    | C | -0.097632 |           |
| C40 | 1 | 0.1594  | 0.7754  | 0.685   | Biso    | 1    | C | 0.177418  |           |
| C41 | 1 | 0.98779 |         | 0.62089 | 0.60166 | Biso | 1 | C         | 0.069095  |
| C42 | 1 | 0.9454  | 0.6183  | 0.60067 | Biso    | 1    | C | -0.15201  |           |
| H19 | 1 | 0.9387  | 0.6355  | 0.6145  | Biso    | 1    | H | 0.137483  |           |
| C43 | 1 | 0.913   | 0.5902  | 0.57922 | Biso    | 1    | C | -0.011709 |           |
| C44 | 1 | 0.92287 |         | 0.56467 | 0.55877 | Biso | 1 | C         | -0.11673  |
| H20 | 1 | 0.9009  | 0.5457  | 0.5443  | Biso    | 1    | H | 0.141462  |           |
| C45 | 1 | 0.96519 |         | 0.56729 | 0.55976 | Biso | 1 | C         | -0.002948 |
| C46 | 1 | 0.9977  | 0.5954  | 0.58121 | Biso    | 1    | C | -0.150735 |           |

|     |   |         |         |         |      |   |   |           |
|-----|---|---------|---------|---------|------|---|---|-----------|
| H21 | 1 | 0.0263  | 0.5972  | 0.5819  | Biso | 1 | H | 0.1342    |
| C47 | 1 | 0.1719  | 0.7886  | 0.65244 | Biso | 1 | C | -0.173833 |
| H22 | 1 | 0.1552  | 0.7722  | 0.635   | Biso | 1 | H | 0.142276  |
| C48 | 1 | 0.0672  | 0.6844  | 0.73437 | Biso | 1 | C | -0.186244 |
| H23 | 1 | 0.0452  | 0.6625  | 0.7212  | Biso | 1 | H | 0.144848  |
| C49 | 1 | 0.1087  | 0.7257  | 0.7259  | Biso | 1 | C | 0.187164  |
| C50 | 1 | 0.9766  | 0.5411  | 0.5369  | Biso | 1 | C | 0.581601  |
| C51 | 1 | 0.8716  | 0.5891  | 0.5782  | Biso | 1 | C | 0.604734  |
| C52 | 1 | 0.0862  | 0.7074  | 0.66932 | Biso | 1 | C | 0.091434  |
| C53 | 1 | 0.0822  | 0.6658  | 0.66129 | Biso | 1 | C | -0.147248 |
| H24 | 1 | 0.1011  | 0.6562  | 0.6707  | Biso | 1 | H | 0.122575  |
| C54 | 1 | 0.0502  | 0.6382  | 0.6394  | Biso | 1 | C | -0.146918 |
| H25 | 1 | 0.0476  | 0.6101  | 0.6339  | Biso | 1 | H | 0.123327  |
| C55 | 1 | 0.0224  | 0.6524  | 0.62547 | Biso | 1 | C | 0.065491  |
| C56 | 1 | 0.0264  | 0.6941  | 0.63351 | Biso | 1 | C | -0.144311 |
| H26 | 1 | 0.0076  | 0.7037  | 0.6241  | Biso | 1 | H | 0.125367  |
| C57 | 1 | 0.05831 | 0.72161 | 0.65543 | Biso | 1 | C | -0.147105 |
| H27 | 1 | 0.061   | 0.7498  | 0.6609  | Biso | 1 | H | 0.124882  |
| O13 | 1 | 0.54963 | 0.53216 | 0.0384  | Biso | 1 | O | -0.52446  |
| O14 | 1 | 0.5135  | 0.5692  | 0.02048 | Biso | 1 | O | -0.495992 |
| O15 | 1 | 0.5635  | 0.7227  | 0.05961 | Biso | 1 | O | -0.537503 |
| O16 | 1 | 0.613   | 0.7502  | 0.09758 | Biso | 1 | O | -0.571709 |
| C58 | 1 | 0.738   | 0.6174  | 0.1951  | Biso | 1 | C | -0.097914 |
| C59 | 1 | 0.7754  | 0.616   | 0.185   | Biso | 1 | C | 0.177404  |
| C60 | 1 | 0.62089 | 0.6331  | 0.10166 | Biso | 1 | C | 0.069005  |
| C61 | 1 | 0.6183  | 0.6729  | 0.10067 | Biso | 1 | C | -0.147683 |
| H28 | 1 | 0.6355  | 0.6968  | 0.1145  | Biso | 1 | H | 0.134546  |
| C62 | 1 | 0.5902  | 0.6772  | 0.07922 | Biso | 1 | C | -0.011858 |
| C63 | 1 | 0.56467 | 0.6418  | 0.05877 | Biso | 1 | C | -0.117148 |
| H29 | 1 | 0.5457  | 0.6448  | 0.0443  | Biso | 1 | H | 0.141233  |
| C64 | 1 | 0.56729 | 0.6021  | 0.05976 | Biso | 1 | C | -0.002744 |
| C65 | 1 | 0.5954  | 0.5977  | 0.08121 | Biso | 1 | C | -0.150532 |
| H30 | 1 | 0.5972  | 0.5709  | 0.0819  | Biso | 1 | H | 0.13451   |
| C66 | 1 | 0.7886  | 0.6167  | 0.15244 | Biso | 1 | C | -0.173774 |
| H31 | 1 | 0.7722  | 0.617   | 0.135   | Biso | 1 | H | 0.142291  |
| C67 | 1 | 0.6844  | 0.6172  | 0.23437 | Biso | 1 | C | -0.186425 |
| H32 | 1 | 0.6625  | 0.6173  | 0.2212  | Biso | 1 | H | 0.144716  |
| C68 | 1 | 0.7257  | 0.617   | 0.2259  | Biso | 1 | C | 0.187395  |
| C69 | 1 | 0.5411  | 0.5645  | 0.0369  | Biso | 1 | C | 0.581403  |
| C70 | 1 | 0.5891  | 0.7175  | 0.0782  | Biso | 1 | C | 0.604683  |
| C71 | 1 | 0.7074  | 0.6212  | 0.16932 | Biso | 1 | C | 0.091619  |
| C72 | 1 | 0.6658  | 0.5836  | 0.16129 | Biso | 1 | C | -0.147327 |
| H33 | 1 | 0.6562  | 0.5551  | 0.1707  | Biso | 1 | H | 0.122754  |
| C73 | 1 | 0.6382  | 0.588   | 0.1394  | Biso | 1 | C | -0.147221 |
| H34 | 1 | 0.6101  | 0.5625  | 0.1339  | Biso | 1 | H | 0.123604  |
| C74 | 1 | 0.6524  | 0.63    | 0.12547 | Biso | 1 | C | 0.065268  |
| C75 | 1 | 0.6941  | 0.6677  | 0.13351 | Biso | 1 | C | -0.144354 |
| H35 | 1 | 0.7037  | 0.6961  | 0.1241  | Biso | 1 | H | 0.125446  |
| C76 | 1 | 0.72161 | 0.6633  | 0.15543 | Biso | 1 | C | -0.147501 |
| H36 | 1 | 0.7498  | 0.6888  | 0.1609  | Biso | 1 | H | 0.125057  |
| O17 | 1 | 0.46784 | 0.01747 | 0.0384  | Biso | 1 | O | -0.524819 |
| O18 | 1 | 0.4308  | 0.9443  | 0.02048 | Biso | 1 | O | -0.495412 |

|      |   |         |         |         |      |   |   |           |  |
|------|---|---------|---------|---------|------|---|---|-----------|--|
| O19  | 1 | 0.2773  | 0.8408  | 0.05961 | Biso | 1 | O | -0.537194 |  |
| O20  | 1 | 0.2498  | 0.8628  | 0.09758 | Biso | 1 | O | -0.57157  |  |
| C77  | 1 | 0.3826  | 0.1206  | 0.1951  | Biso | 1 | C | -0.098078 |  |
| C78  | 1 | 0.384   | 0.1594  | 0.185   | Biso | 1 | C | 0.177295  |  |
| C79  | 1 | 0.3669  | 0.98779 | 0.10166 | Biso | 1 | C | 0.069569  |  |
| C80  | 1 | 0.3271  | 0.9454  | 0.10067 | Biso | 1 | C | -0.148607 |  |
| H37  | 1 | 0.3032  | 0.9387  | 0.1145  | Biso | 1 | H | 0.135218  |  |
| C81  | 1 | 0.3228  | 0.913   | 0.07922 | Biso | 1 | C | -0.012461 |  |
| C82  | 1 | 0.3582  | 0.92287 | 0.05877 | Biso | 1 | C | -0.116872 |  |
| H38  | 1 | 0.3552  | 0.9009  | 0.0443  | Biso | 1 | H | 0.141514  |  |
| C83  | 1 | 0.3979  | 0.96519 | 0.05976 | Biso | 1 | C | -0.002587 |  |
| C84  | 1 | 0.4023  | 0.9977  | 0.08121 | Biso | 1 | C | -0.150335 |  |
| H39  | 1 | 0.4291  | 0.0263  | 0.0819  | Biso | 1 | H | 0.134429  |  |
| C85  | 1 | 0.3833  | 0.1719  | 0.15244 | Biso | 1 | C | -0.174103 |  |
| H40  | 1 | 0.383   | 0.1552  | 0.135   | Biso | 1 | H | 0.142022  |  |
| C86  | 1 | 0.3828  | 0.0672  | 0.23437 | Biso | 1 | C | -0.186716 |  |
| H41  | 1 | 0.3827  | 0.0452  | 0.2212  | Biso | 1 | H | 0.14446   |  |
| C87  | 1 | 0.383   | 0.1087  | 0.2259  | Biso | 1 | C | 0.187255  |  |
| C88  | 1 | 0.4355  | 0.9766  | 0.0369  | Biso | 1 | C | 0.581219  |  |
| C89  | 1 | 0.2825  | 0.8716  | 0.0782  | Biso | 1 | C | 0.605166  |  |
| C90  | 1 | 0.3788  | 0.0862  | 0.16932 | Biso | 1 | C | 0.091878  |  |
| C91  | 1 | 0.4164  | 0.0822  | 0.16129 | Biso | 1 | C | -0.147522 |  |
| H42  | 1 | 0.4449  | 0.1011  | 0.1707  | Biso | 1 | H | 0.122828  |  |
| C92  | 1 | 0.412   | 0.0502  | 0.1394  | Biso | 1 | C | -0.146559 |  |
| H43  | 1 | 0.4375  | 0.0476  | 0.1339  | Biso | 1 | H | 0.122741  |  |
| C93  | 1 | 0.37    | 0.0224  | 0.12547 | Biso | 1 | C | 0.064439  |  |
| C94  | 1 | 0.3323  | 0.0264  | 0.13351 | Biso | 1 | C | -0.144434 |  |
| H44  | 1 | 0.3039  | 0.0076  | 0.1241  | Biso | 1 | H | 0.125647  |  |
| C95  | 1 | 0.3367  | 0.05831 | 0.15543 | Biso | 1 | C | -0.146771 |  |
| H45  | 1 | 0.3112  | 0.061   | 0.1609  | Biso | 1 | H | 0.125229  |  |
| O21  | 1 | 0.98253 | 0.45037 | 0.0384  | Biso | 1 | O | -0.524506 |  |
| O22  | 1 | 0.0557  | 0.4865  | 0.02048 | Biso | 1 | O | -0.495994 |  |
| O23  | 1 | 0.1592  | 0.4365  | 0.05961 | Biso | 1 | O | -0.538037 |  |
| O24  | 1 | 0.1372  | 0.387   | 0.09758 | Biso | 1 | O | -0.571651 |  |
| C96  | 1 | 0.8794  | 0.262   | 0.1951  | Biso | 1 | C | -0.097833 |  |
| C97  | 1 | 0.8406  | 0.2246  | 0.185   | Biso | 1 | C | 0.177313  |  |
| C98  | 1 | 0.01221 | 0.37911 | 0.10166 | Biso | 1 | C | 0.069468  |  |
| C99  | 1 | 0.0546  | 0.3817  | 0.10067 | Biso | 1 | C | -0.14853  |  |
| H46  | 1 | 0.0613  | 0.3645  | 0.1145  | Biso | 1 | H | 0.135216  |  |
| C100 | 1 | 0.087   | 0.4098  | 0.07922 | Biso | 1 | C | -0.011913 |  |
| C101 | 1 | 0.07713 | 0.43533 | 0.05877 | Biso | 1 | C | -0.116779 |  |
| H47  | 1 | 0.0991  | 0.4543  | 0.0443  | Biso | 1 | H | 0.141106  |  |
| C102 | 1 | 0.03481 | 0.43271 | 0.05976 | Biso | 1 | C | -0.002814 |  |
| C103 | 1 | 0.0023  | 0.4046  | 0.08121 | Biso | 1 | C | -0.151925 |  |
| H48  | 1 | 0.9737  | 0.4028  | 0.0819  | Biso | 1 | H | 0.134767  |  |
| C104 | 1 | 0.8281  | 0.2114  | 0.15244 | Biso | 1 | C | -0.174228 |  |
| H49  | 1 | 0.8448  | 0.2278  | 0.135   | Biso | 1 | H | 0.142201  |  |
| C105 | 1 | 0.9328  | 0.3156  | 0.23437 | Biso | 1 | C | -0.18651  |  |
| H50  | 1 | 0.9548  | 0.3375  | 0.2212  | Biso | 1 | H | 0.14454   |  |
| C106 | 1 | 0.8913  | 0.2743  | 0.2259  | Biso | 1 | C | 0.187211  |  |
| C107 | 1 | 0.0234  | 0.4589  | 0.0369  | Biso | 1 | C | 0.581301  |  |
| C108 | 1 | 0.1284  | 0.4109  | 0.0782  | Biso | 1 | C | 0.604729  |  |

|      |   |         |         |         |      |   |   |           |
|------|---|---------|---------|---------|------|---|---|-----------|
| C109 | 1 | 0.9138  | 0.2926  | 0.16932 | Biso | 1 | C | 0.091457  |
| C110 | 1 | 0.9178  | 0.3342  | 0.16129 | Biso | 1 | C | -0.147342 |
| H51  | 1 | 0.8989  | 0.3438  | 0.1707  | Biso | 1 | H | 0.122666  |
| C111 | 1 | 0.9498  | 0.3618  | 0.1394  | Biso | 1 | C | -0.14688  |
| H52  | 1 | 0.9524  | 0.3899  | 0.1339  | Biso | 1 | H | 0.123025  |
| C112 | 1 | 0.9776  | 0.3476  | 0.12547 | Biso | 1 | C | 0.065016  |
| C113 | 1 | 0.9736  | 0.3059  | 0.13351 | Biso | 1 | C | -0.144304 |
| H53  | 1 | 0.9924  | 0.2963  | 0.1241  | Biso | 1 | H | 0.125442  |
| C114 | 1 | 0.94169 | 0.27839 | 0.15543 | Biso | 1 | C | -0.147001 |
| H54  | 1 | 0.939   | 0.2502  | 0.1609  | Biso | 1 | H | 0.125128  |
| O25  | 1 | 0.46784 | 0.45037 | 0.4616  | Biso | 1 | O | -0.524542 |
| O26  | 1 | 0.4308  | 0.4865  | 0.47952 | Biso | 1 | O | -0.495733 |
| O27  | 1 | 0.2773  | 0.4365  | 0.44039 | Biso | 1 | O | -0.537854 |
| O28  | 1 | 0.2498  | 0.387   | 0.40242 | Biso | 1 | O | -0.572046 |
| C115 | 1 | 0.3826  | 0.262   | 0.3049  | Biso | 1 | C | -0.097602 |
| C116 | 1 | 0.384   | 0.2246  | 0.315   | Biso | 1 | C | 0.177396  |
| C117 | 1 | 0.3669  | 0.37911 | 0.39834 | Biso | 1 | C | 0.068945  |
| C118 | 1 | 0.3271  | 0.3817  | 0.39933 | Biso | 1 | C | -0.147732 |
| H55  | 1 | 0.3032  | 0.3645  | 0.3855  | Biso | 1 | H | 0.134809  |
| C119 | 1 | 0.3228  | 0.4098  | 0.42078 | Biso | 1 | C | -0.011417 |
| C120 | 1 | 0.3582  | 0.43533 | 0.44123 | Biso | 1 | C | -0.11737  |
| H56  | 1 | 0.3552  | 0.4543  | 0.4557  | Biso | 1 | H | 0.141332  |
| C121 | 1 | 0.3979  | 0.43271 | 0.44024 | Biso | 1 | C | -0.002864 |
| C122 | 1 | 0.4023  | 0.4046  | 0.41879 | Biso | 1 | C | -0.151099 |
| H57  | 1 | 0.4291  | 0.4028  | 0.4181  | Biso | 1 | H | 0.134141  |
| C123 | 1 | 0.3833  | 0.2114  | 0.34756 | Biso | 1 | C | -0.173715 |
| H58  | 1 | 0.383   | 0.2278  | 0.365   | Biso | 1 | H | 0.142211  |
| C124 | 1 | 0.3828  | 0.3156  | 0.26563 | Biso | 1 | C | -0.186127 |
| H59  | 1 | 0.3827  | 0.3375  | 0.2788  | Biso | 1 | H | 0.144681  |
| C125 | 1 | 0.383   | 0.2743  | 0.2741  | Biso | 1 | C | 0.187372  |
| C126 | 1 | 0.4355  | 0.4589  | 0.4631  | Biso | 1 | C | 0.581456  |
| C127 | 1 | 0.2825  | 0.4109  | 0.4218  | Biso | 1 | C | 0.604166  |
| C128 | 1 | 0.3788  | 0.2926  | 0.33068 | Biso | 1 | C | 0.09139   |
| C129 | 1 | 0.4164  | 0.3342  | 0.33871 | Biso | 1 | C | -0.147794 |
| H60  | 1 | 0.4449  | 0.3438  | 0.3293  | Biso | 1 | H | 0.122489  |
| C130 | 1 | 0.412   | 0.3618  | 0.3606  | Biso | 1 | C | -0.146906 |
| H61  | 1 | 0.4375  | 0.3899  | 0.3661  | Biso | 1 | H | 0.123069  |
| C131 | 1 | 0.37    | 0.3476  | 0.37453 | Biso | 1 | C | 0.065172  |
| C132 | 1 | 0.3323  | 0.3059  | 0.36649 | Biso | 1 | C | -0.144213 |
| H62  | 1 | 0.3039  | 0.2963  | 0.3759  | Biso | 1 | H | 0.125863  |
| C133 | 1 | 0.3367  | 0.27839 | 0.34457 | Biso | 1 | C | -0.147411 |
| H63  | 1 | 0.3112  | 0.2502  | 0.3391  | Biso | 1 | H | 0.125386  |
| O29  | 1 | 0.98253 | 0.53216 | 0.4616  | Biso | 1 | O | -0.524357 |
| O30  | 1 | 0.0557  | 0.5692  | 0.47952 | Biso | 1 | O | -0.495554 |
| O31  | 1 | 0.1592  | 0.7227  | 0.44039 | Biso | 1 | O | -0.537675 |
| O32  | 1 | 0.1372  | 0.7502  | 0.40242 | Biso | 1 | O | -0.572813 |
| C134 | 1 | 0.8794  | 0.6174  | 0.3049  | Biso | 1 | C | -0.097797 |
| C135 | 1 | 0.8406  | 0.616   | 0.315   | Biso | 1 | C | 0.177346  |
| C136 | 1 | 0.01221 | 0.6331  | 0.39834 | Biso | 1 | C | 0.068913  |
| C137 | 1 | 0.0546  | 0.6729  | 0.39933 | Biso | 1 | C | -0.152002 |
| H64  | 1 | 0.0613  | 0.6968  | 0.3855  | Biso | 1 | H | 0.137095  |
| C138 | 1 | 0.087   | 0.6772  | 0.42078 | Biso | 1 | C | -0.011788 |

|      |   |         |         |         |      |   |   |           |
|------|---|---------|---------|---------|------|---|---|-----------|
| C139 | 1 | 0.07713 | 0.6418  | 0.44123 | Biso | 1 | C | -0.116762 |
| H65  | 1 | 0.0991  | 0.6448  | 0.4557  | Biso | 1 | H | 0.141452  |
| C140 | 1 | 0.03481 | 0.6021  | 0.44024 | Biso | 1 | C | -0.002767 |
| C141 | 1 | 0.0023  | 0.5977  | 0.41879 | Biso | 1 | C | -0.150897 |
| H66  | 1 | 0.9737  | 0.5709  | 0.4181  | Biso | 1 | H | 0.134835  |
| C142 | 1 | 0.8281  | 0.6167  | 0.34756 | Biso | 1 | C | -0.173984 |
| H67  | 1 | 0.8448  | 0.617   | 0.365   | Biso | 1 | H | 0.142331  |
| C143 | 1 | 0.9328  | 0.6172  | 0.26563 | Biso | 1 | C | -0.186234 |
| H68  | 1 | 0.9548  | 0.6173  | 0.2788  | Biso | 1 | H | 0.14454   |
| C144 | 1 | 0.8913  | 0.617   | 0.2741  | Biso | 1 | C | 0.187326  |
| C145 | 1 | 0.0234  | 0.5645  | 0.4631  | Biso | 1 | C | 0.581136  |
| C146 | 1 | 0.1284  | 0.7175  | 0.4218  | Biso | 1 | C | 0.605006  |
| C147 | 1 | 0.9138  | 0.6212  | 0.33068 | Biso | 1 | C | 0.091476  |
| C148 | 1 | 0.9178  | 0.5836  | 0.33871 | Biso | 1 | C | -0.1475   |
| H69  | 1 | 0.8989  | 0.5551  | 0.3293  | Biso | 1 | H | 0.122824  |
| C149 | 1 | 0.9498  | 0.588   | 0.3606  | Biso | 1 | C | -0.146691 |
| H70  | 1 | 0.9524  | 0.5625  | 0.3661  | Biso | 1 | H | 0.123144  |
| C150 | 1 | 0.9776  | 0.63    | 0.37453 | Biso | 1 | C | 0.065173  |
| C151 | 1 | 0.9736  | 0.6677  | 0.36649 | Biso | 1 | C | -0.144423 |
| H71  | 1 | 0.9924  | 0.6961  | 0.3759  | Biso | 1 | H | 0.125643  |
| C152 | 1 | 0.94169 | 0.6633  | 0.34457 | Biso | 1 | C | -0.147173 |
| H72  | 1 | 0.939   | 0.6888  | 0.3391  | Biso | 1 | H | 0.124969  |
| O33  | 1 | 0.54963 | 0.01747 | 0.4616  | Biso | 1 | O | -0.524638 |
| O34  | 1 | 0.5135  | 0.9443  | 0.47952 | Biso | 1 | O | -0.495043 |
| O35  | 1 | 0.5635  | 0.8408  | 0.44039 | Biso | 1 | O | -0.537458 |
| O36  | 1 | 0.613   | 0.8628  | 0.40242 | Biso | 1 | O | -0.57257  |
| C153 | 1 | 0.738   | 0.1206  | 0.3049  | Biso | 1 | C | -0.097908 |
| C154 | 1 | 0.7754  | 0.1594  | 0.315   | Biso | 1 | C | 0.17761   |
| C155 | 1 | 0.62089 | 0.98779 | 0.39834 | Biso | 1 | C | 0.069132  |
| C156 | 1 | 0.6183  | 0.9454  | 0.39933 | Biso | 1 | C | -0.151975 |
| H73  | 1 | 0.6355  | 0.9387  | 0.3855  | Biso | 1 | H | 0.13737   |
| C157 | 1 | 0.5902  | 0.913   | 0.42078 | Biso | 1 | C | -0.011788 |
| C158 | 1 | 0.56467 | 0.92287 | 0.44123 | Biso | 1 | C | -0.11662  |
| H74  | 1 | 0.5457  | 0.9009  | 0.4557  | Biso | 1 | H | 0.141629  |
| C159 | 1 | 0.56729 | 0.96519 | 0.44024 | Biso | 1 | C | -0.002857 |
| C160 | 1 | 0.5954  | 0.9977  | 0.41879 | Biso | 1 | C | -0.15059  |
| H75  | 1 | 0.5972  | 0.0263  | 0.4181  | Biso | 1 | H | 0.134     |
| C161 | 1 | 0.7886  | 0.1719  | 0.34756 | Biso | 1 | C | -0.173912 |
| H76  | 1 | 0.7722  | 0.1552  | 0.365   | Biso | 1 | H | 0.142485  |
| C162 | 1 | 0.6844  | 0.0672  | 0.26563 | Biso | 1 | C | -0.186292 |
| H77  | 1 | 0.6625  | 0.0452  | 0.2788  | Biso | 1 | H | 0.144949  |
| C163 | 1 | 0.7257  | 0.1087  | 0.2741  | Biso | 1 | C | 0.187317  |
| C164 | 1 | 0.5411  | 0.9766  | 0.4631  | Biso | 1 | C | 0.581219  |
| C165 | 1 | 0.5891  | 0.8716  | 0.4218  | Biso | 1 | C | 0.604742  |
| C166 | 1 | 0.7074  | 0.0862  | 0.33068 | Biso | 1 | C | 0.091562  |
| C167 | 1 | 0.6658  | 0.0822  | 0.33871 | Biso | 1 | C | -0.147439 |
| H78  | 1 | 0.6562  | 0.1011  | 0.3293  | Biso | 1 | H | 0.122578  |
| C168 | 1 | 0.6382  | 0.0502  | 0.3606  | Biso | 1 | C | -0.146973 |
| H79  | 1 | 0.6101  | 0.0476  | 0.3661  | Biso | 1 | H | 0.123341  |
| C169 | 1 | 0.6524  | 0.0224  | 0.37453 | Biso | 1 | C | 0.065249  |
| C170 | 1 | 0.6941  | 0.0264  | 0.36649 | Biso | 1 | C | -0.144189 |
| H80  | 1 | 0.7037  | 0.0076  | 0.3759  | Biso | 1 | H | 0.125504  |

|      |   |         |         |         |      |   |   |           |
|------|---|---------|---------|---------|------|---|---|-----------|
| C171 | 1 | 0.72161 | 0.05831 | 0.34457 | Biso | 1 | C | -0.147104 |
| H81  | 1 | 0.7498  | 0.061   | 0.3391  | Biso | 1 | H | 0.124948  |
| O37  | 1 | 0.53216 | 0.54963 | 0.9616  | Biso | 1 | O | -0.524818 |
| O38  | 1 | 0.5692  | 0.5135  | 0.97952 | Biso | 1 | O | -0.495678 |
| O39  | 1 | 0.7227  | 0.5635  | 0.94039 | Biso | 1 | O | -0.537636 |
| O40  | 1 | 0.7502  | 0.613   | 0.90242 | Biso | 1 | O | -0.572635 |
| C172 | 1 | 0.6174  | 0.738   | 0.8049  | Biso | 1 | C | -0.097894 |
| C173 | 1 | 0.616   | 0.7754  | 0.815   | Biso | 1 | C | 0.177656  |
| C174 | 1 | 0.6331  | 0.62089 | 0.89834 | Biso | 1 | C | 0.068799  |
| C175 | 1 | 0.6729  | 0.6183  | 0.89933 | Biso | 1 | C | -0.147682 |
| H82  | 1 | 0.6968  | 0.6355  | 0.8855  | Biso | 1 | H | 0.134403  |
| C176 | 1 | 0.6772  | 0.5902  | 0.92078 | Biso | 1 | C | -0.011359 |
| C177 | 1 | 0.6418  | 0.56467 | 0.94123 | Biso | 1 | C | -0.117429 |
| H83  | 1 | 0.6448  | 0.5457  | 0.9557  | Biso | 1 | H | 0.141581  |
| C178 | 1 | 0.6021  | 0.56729 | 0.94024 | Biso | 1 | C | -0.003072 |
| C179 | 1 | 0.5977  | 0.5954  | 0.91879 | Biso | 1 | C | -0.151277 |
| H84  | 1 | 0.5709  | 0.5972  | 0.9181  | Biso | 1 | H | 0.134277  |
| C180 | 1 | 0.6167  | 0.7886  | 0.84756 | Biso | 1 | C | -0.173709 |
| H85  | 1 | 0.617   | 0.7722  | 0.865   | Biso | 1 | H | 0.142611  |
| C181 | 1 | 0.6172  | 0.6844  | 0.76563 | Biso | 1 | C | -0.186021 |
| H86  | 1 | 0.6173  | 0.6625  | 0.7788  | Biso | 1 | H | 0.145005  |
| C182 | 1 | 0.617   | 0.7257  | 0.7741  | Biso | 1 | C | 0.187696  |
| C183 | 1 | 0.5645  | 0.5411  | 0.9631  | Biso | 1 | C | 0.58165   |
| C184 | 1 | 0.7175  | 0.5891  | 0.9218  | Biso | 1 | C | 0.604334  |
| C185 | 1 | 0.6212  | 0.7074  | 0.83068 | Biso | 1 | C | 0.091415  |
| C186 | 1 | 0.5836  | 0.6658  | 0.83871 | Biso | 1 | C | -0.147728 |
| H87  | 1 | 0.5551  | 0.6562  | 0.8293  | Biso | 1 | H | 0.122629  |
| C187 | 1 | 0.588   | 0.6382  | 0.8606  | Biso | 1 | C | -0.147185 |
| H88  | 1 | 0.5625  | 0.6101  | 0.8661  | Biso | 1 | H | 0.123639  |
| C188 | 1 | 0.63    | 0.6524  | 0.87453 | Biso | 1 | C | 0.065485  |
| C189 | 1 | 0.6677  | 0.6941  | 0.86649 | Biso | 1 | C | -0.144348 |
| H89  | 1 | 0.6961  | 0.7037  | 0.8759  | Biso | 1 | H | 0.125708  |
| C190 | 1 | 0.6633  | 0.72161 | 0.84457 | Biso | 1 | C | -0.147559 |
| H90  | 1 | 0.6888  | 0.7498  | 0.8391  | Biso | 1 | H | 0.124966  |
| O41  | 1 | 0.01747 | 0.46784 | 0.9616  | Biso | 1 | O | -0.524848 |
| O42  | 1 | 0.9443  | 0.4308  | 0.97952 | Biso | 1 | O | -0.495246 |
| O43  | 1 | 0.8408  | 0.2773  | 0.94039 | Biso | 1 | O | -0.537411 |
| O44  | 1 | 0.8628  | 0.2498  | 0.90242 | Biso | 1 | O | -0.572478 |
| C191 | 1 | 0.1206  | 0.3826  | 0.8049  | Biso | 1 | C | -0.097785 |
| C192 | 1 | 0.1594  | 0.384   | 0.815   | Biso | 1 | C | 0.177448  |
| C193 | 1 | 0.98779 | 0.3669  | 0.89834 | Biso | 1 | C | 0.069215  |
| C194 | 1 | 0.9454  | 0.3271  | 0.89933 | Biso | 1 | C | -0.148552 |
| H91  | 1 | 0.9387  | 0.3032  | 0.8855  | Biso | 1 | H | 0.134863  |
| C195 | 1 | 0.913   | 0.3228  | 0.92078 | Biso | 1 | C | -0.011876 |
| C196 | 1 | 0.92287 | 0.3582  | 0.94123 | Biso | 1 | C | -0.116897 |
| H92  | 1 | 0.9009  | 0.3552  | 0.9557  | Biso | 1 | H | 0.141604  |
| C197 | 1 | 0.96519 | 0.3979  | 0.94024 | Biso | 1 | C | -0.002838 |
| C198 | 1 | 0.9977  | 0.4023  | 0.91879 | Biso | 1 | C | -0.151048 |
| H93  | 1 | 0.0263  | 0.4291  | 0.9181  | Biso | 1 | H | 0.134232  |
| C199 | 1 | 0.1719  | 0.3833  | 0.84756 | Biso | 1 | C | -0.17395  |
| H94  | 1 | 0.1552  | 0.383   | 0.865   | Biso | 1 | H | 0.142454  |
| C200 | 1 | 0.0672  | 0.3828  | 0.76563 | Biso | 1 | C | -0.186013 |

|      |   |         |         |         |      |   |   |           |  |
|------|---|---------|---------|---------|------|---|---|-----------|--|
| H95  | 1 | 0.0452  | 0.3827  | 0.7788  | Biso | 1 | H | 0.144714  |  |
| C201 | 1 | 0.1087  | 0.383   | 0.7741  | Biso | 1 | C | 0.187251  |  |
| C202 | 1 | 0.9766  | 0.4355  | 0.9631  | Biso | 1 | C | 0.581358  |  |
| C203 | 1 | 0.8716  | 0.2825  | 0.9218  | Biso | 1 | C | 0.604625  |  |
| C204 | 1 | 0.0862  | 0.3788  | 0.83068 | Biso | 1 | C | 0.091509  |  |
| C205 | 1 | 0.0822  | 0.4164  | 0.83871 | Biso | 1 | C | -0.147787 |  |
| H96  | 1 | 0.1011  | 0.4449  | 0.8293  | Biso | 1 | H | 0.12257   |  |
| C206 | 1 | 0.0502  | 0.412   | 0.8606  | Biso | 1 | C | -0.146731 |  |
| H97  | 1 | 0.0476  | 0.4375  | 0.8661  | Biso | 1 | H | 0.12286   |  |
| C207 | 1 | 0.0224  | 0.37    | 0.87453 | Biso | 1 | C | 0.064981  |  |
| C208 | 1 | 0.0264  | 0.3323  | 0.86649 | Biso | 1 | C | -0.144314 |  |
| H98  | 1 | 0.0076  | 0.3039  | 0.8759  | Biso | 1 | H | 0.125955  |  |
| C209 | 1 | 0.05831 | 0.3367  | 0.84457 | Biso | 1 | C | -0.14703  |  |
| H99  | 1 | 0.061   | 0.3112  | 0.8391  | Biso | 1 | H | 0.125106  |  |
| O45  | 1 | 0.45037 | 0.98253 | 0.9616  | Biso | 1 | O | -0.524239 |  |
| O46  | 1 | 0.4865  | 0.0557  | 0.97952 | Biso | 1 | O | -0.495373 |  |
| O47  | 1 | 0.4365  | 0.1592  | 0.94039 | Biso | 1 | O | -0.537833 |  |
| O48  | 1 | 0.387   | 0.1372  | 0.90242 | Biso | 1 | O | -0.572157 |  |
| C210 | 1 | 0.262   | 0.8794  | 0.8049  | Biso | 1 | C | -0.098092 |  |
| C211 | 1 | 0.2246  | 0.8406  | 0.815   | Biso | 1 | C | 0.177556  |  |
| C212 | 1 | 0.37911 | 0.01221 | 0.89834 | Biso | 1 | C | 0.069199  |  |
| C213 | 1 | 0.3817  | 0.0546  | 0.89933 | Biso | 1 | C | -0.148369 |  |
| H100 | 1 | 0.3645  | 0.0613  | 0.8855  | Biso | 1 | H | 0.134972  |  |
| C214 | 1 | 0.4098  | 0.087   | 0.92078 | Biso | 1 | C | -0.011651 |  |
| C215 | 1 | 0.43533 | 0.07713 | 0.94123 | Biso | 1 | C | -0.117111 |  |
| H101 | 1 | 0.4543  | 0.0991  | 0.9557  | Biso | 1 | H | 0.141465  |  |
| C216 | 1 | 0.43271 | 0.03481 | 0.94024 | Biso | 1 | C | -0.002991 |  |
| C217 | 1 | 0.4046  | 0.0023  | 0.91879 | Biso | 1 | C | -0.15099  |  |
| H102 | 1 | 0.4028  | 0.9737  | 0.9181  | Biso | 1 | H | 0.134239  |  |
| C218 | 1 | 0.2114  | 0.8281  | 0.84756 | Biso | 1 | C | -0.174457 |  |
| H103 | 1 | 0.2278  | 0.8448  | 0.865   | Biso | 1 | H | 0.142341  |  |
| C219 | 1 | 0.3156  | 0.9328  | 0.76563 | Biso | 1 | C | -0.186421 |  |
| H104 | 1 | 0.3375  | 0.9548  | 0.7788  | Biso | 1 | H | 0.144632  |  |
| C220 | 1 | 0.2743  | 0.8913  | 0.7741  | Biso | 1 | C | 0.187281  |  |
| C221 | 1 | 0.4589  | 0.0234  | 0.9631  | Biso | 1 | C | 0.581101  |  |
| C222 | 1 | 0.4109  | 0.1284  | 0.9218  | Biso | 1 | C | 0.604777  |  |
| C223 | 1 | 0.2926  | 0.9138  | 0.83068 | Biso | 1 | C | 0.091636  |  |
| C224 | 1 | 0.3342  | 0.9178  | 0.83871 | Biso | 1 | C | -0.147254 |  |
| H105 | 1 | 0.3438  | 0.8989  | 0.8293  | Biso | 1 | H | 0.122624  |  |
| C225 | 1 | 0.3618  | 0.9498  | 0.8606  | Biso | 1 | C | -0.146952 |  |
| H106 | 1 | 0.3899  | 0.9524  | 0.8661  | Biso | 1 | H | 0.123069  |  |
| C226 | 1 | 0.3476  | 0.9776  | 0.87453 | Biso | 1 | C | 0.064892  |  |
| C227 | 1 | 0.3059  | 0.9736  | 0.86649 | Biso | 1 | C | -0.144253 |  |
| H107 | 1 | 0.2963  | 0.9924  | 0.8759  | Biso | 1 | H | 0.125459  |  |
| C228 | 1 | 0.27839 | 0.94169 | 0.84457 | Biso | 1 | C | -0.147174 |  |
| H108 | 1 | 0.2502  | 0.939   | 0.8391  | Biso | 1 | H | 0.125061  |  |
| O49  | 1 | 0.54963 | 0.53216 | 0.4616  | Biso | 1 | O | -0.524353 |  |
| O50  | 1 | 0.5135  | 0.5692  | 0.47952 | Biso | 1 | O | -0.495724 |  |
| O51  | 1 | 0.5635  | 0.7227  | 0.44039 | Biso | 1 | O | -0.53739  |  |
| O52  | 1 | 0.613   | 0.7502  | 0.40242 | Biso | 1 | O | -0.572129 |  |
| C229 | 1 | 0.738   | 0.6174  | 0.3049  | Biso | 1 | C | -0.097909 |  |
| C230 | 1 | 0.7754  | 0.616   | 0.315   | Biso | 1 | C | 0.177635  |  |

|      |   |         |         |         |      |   |   |           |
|------|---|---------|---------|---------|------|---|---|-----------|
| C231 | 1 | 0.62089 | 0.6331  | 0.39834 | Biso | 1 | C | 0.068884  |
| C232 | 1 | 0.6183  | 0.6729  | 0.39933 | Biso | 1 | C | -0.147544 |
| H109 | 1 | 0.6355  | 0.6968  | 0.3855  | Biso | 1 | H | 0.134423  |
| C233 | 1 | 0.5902  | 0.6772  | 0.42078 | Biso | 1 | C | -0.011659 |
| C234 | 1 | 0.56467 | 0.6418  | 0.44123 | Biso | 1 | C | -0.117234 |
| H110 | 1 | 0.5457  | 0.6448  | 0.4557  | Biso | 1 | H | 0.141446  |
| C235 | 1 | 0.56729 | 0.6021  | 0.44024 | Biso | 1 | C | -0.002855 |
| C236 | 1 | 0.5954  | 0.5977  | 0.41879 | Biso | 1 | C | -0.150876 |
| H111 | 1 | 0.5972  | 0.5709  | 0.4181  | Biso | 1 | H | 0.134488  |
| C237 | 1 | 0.7886  | 0.6167  | 0.34756 | Biso | 1 | C | -0.173812 |
| H112 | 1 | 0.7722  | 0.617   | 0.365   | Biso | 1 | H | 0.142506  |
| C238 | 1 | 0.6844  | 0.6172  | 0.26563 | Biso | 1 | C | -0.186132 |
| H113 | 1 | 0.6625  | 0.6173  | 0.2788  | Biso | 1 | H | 0.14481   |
| C239 | 1 | 0.7257  | 0.617   | 0.2741  | Biso | 1 | C | 0.187461  |
| C240 | 1 | 0.5411  | 0.5645  | 0.4631  | Biso | 1 | C | 0.58147   |
| C241 | 1 | 0.5891  | 0.7175  | 0.4218  | Biso | 1 | C | 0.60453   |
| C242 | 1 | 0.7074  | 0.6212  | 0.33068 | Biso | 1 | C | 0.091547  |
| C243 | 1 | 0.6658  | 0.5836  | 0.33871 | Biso | 1 | C | -0.147537 |
| H114 | 1 | 0.6562  | 0.5551  | 0.3293  | Biso | 1 | H | 0.122721  |
| C244 | 1 | 0.6382  | 0.588   | 0.3606  | Biso | 1 | C | -0.14715  |
| H115 | 1 | 0.6101  | 0.5625  | 0.3661  | Biso | 1 | H | 0.123615  |
| C245 | 1 | 0.6524  | 0.63    | 0.37453 | Biso | 1 | C | 0.065365  |
| C246 | 1 | 0.6941  | 0.6677  | 0.36649 | Biso | 1 | C | -0.144322 |
| H116 | 1 | 0.7037  | 0.6961  | 0.3759  | Biso | 1 | H | 0.125538  |
| C247 | 1 | 0.72161 | 0.6633  | 0.34457 | Biso | 1 | C | -0.147523 |
| H117 | 1 | 0.7498  | 0.6888  | 0.3391  | Biso | 1 | H | 0.12503   |
| O53  | 1 | 0.46784 | 0.01747 | 0.4616  | Biso | 1 | O | -0.524698 |
| O54  | 1 | 0.4308  | 0.9443  | 0.47952 | Biso | 1 | O | -0.49506  |
| O55  | 1 | 0.2773  | 0.8408  | 0.44039 | Biso | 1 | O | -0.537635 |
| O56  | 1 | 0.2498  | 0.8628  | 0.40242 | Biso | 1 | O | -0.572643 |
| C248 | 1 | 0.3826  | 0.1206  | 0.3049  | Biso | 1 | C | -0.097647 |
| C249 | 1 | 0.384   | 0.1594  | 0.315   | Biso | 1 | C | 0.17737   |
| C250 | 1 | 0.3669  | 0.98779 | 0.39834 | Biso | 1 | C | 0.069089  |
| C251 | 1 | 0.3271  | 0.9454  | 0.39933 | Biso | 1 | C | -0.152102 |
| H118 | 1 | 0.3032  | 0.9387  | 0.3855  | Biso | 1 | H | 0.137423  |
| C252 | 1 | 0.3228  | 0.913   | 0.42078 | Biso | 1 | C | -0.011793 |
| C253 | 1 | 0.3582  | 0.92287 | 0.44123 | Biso | 1 | C | -0.116572 |
| H119 | 1 | 0.3552  | 0.9009  | 0.4557  | Biso | 1 | H | 0.141567  |
| C254 | 1 | 0.3979  | 0.96519 | 0.44024 | Biso | 1 | C | -0.002816 |
| C255 | 1 | 0.4023  | 0.9977  | 0.41879 | Biso | 1 | C | -0.150892 |
| H120 | 1 | 0.4291  | 0.0263  | 0.4181  | Biso | 1 | H | 0.134233  |
| C256 | 1 | 0.3833  | 0.1719  | 0.34756 | Biso | 1 | C | -0.173896 |
| H121 | 1 | 0.383   | 0.1552  | 0.365   | Biso | 1 | H | 0.142271  |
| C257 | 1 | 0.3828  | 0.0672  | 0.26563 | Biso | 1 | C | -0.1863   |
| H122 | 1 | 0.3827  | 0.0452  | 0.2788  | Biso | 1 | H | 0.144681  |
| C258 | 1 | 0.383   | 0.1087  | 0.2741  | Biso | 1 | C | 0.187227  |
| C259 | 1 | 0.4355  | 0.9766  | 0.4631  | Biso | 1 | C | 0.581278  |
| C260 | 1 | 0.2825  | 0.8716  | 0.4218  | Biso | 1 | C | 0.604711  |
| C261 | 1 | 0.3788  | 0.0862  | 0.33068 | Biso | 1 | C | 0.091445  |
| C262 | 1 | 0.4164  | 0.0822  | 0.33871 | Biso | 1 | C | -0.147716 |
| H123 | 1 | 0.4449  | 0.1011  | 0.3293  | Biso | 1 | H | 0.122625  |
| C263 | 1 | 0.412   | 0.0502  | 0.3606  | Biso | 1 | C | -0.146682 |

|      |   |         |         |         |      |   |   |           |  |
|------|---|---------|---------|---------|------|---|---|-----------|--|
| H124 | 1 | 0.4375  | 0.0476  | 0.3661  | Biso | 1 | H | 0.122904  |  |
| C264 | 1 | 0.37    | 0.0224  | 0.37453 | Biso | 1 | C | 0.064995  |  |
| C265 | 1 | 0.3323  | 0.0264  | 0.36649 | Biso | 1 | C | -0.144425 |  |
| H125 | 1 | 0.3039  | 0.0076  | 0.3759  | Biso | 1 | H | 0.125913  |  |
| C266 | 1 | 0.3367  | 0.05831 | 0.34457 | Biso | 1 | C | -0.146899 |  |
| H126 | 1 | 0.3112  | 0.061   | 0.3391  | Biso | 1 | H | 0.125117  |  |
| O57  | 1 | 0.98253 | 0.45037 | 0.4616  | Biso | 1 | O | -0.524167 |  |
| O58  | 1 | 0.0557  | 0.4865  | 0.47952 | Biso | 1 | O | -0.49557  |  |
| O59  | 1 | 0.1592  | 0.4365  | 0.44039 | Biso | 1 | O | -0.537862 |  |
| O60  | 1 | 0.1372  | 0.387   | 0.40242 | Biso | 1 | O | -0.57236  |  |
| C267 | 1 | 0.8794  | 0.262   | 0.3049  | Biso | 1 | C | -0.097644 |  |
| C268 | 1 | 0.8406  | 0.2246  | 0.315   | Biso | 1 | C | 0.177476  |  |
| C269 | 1 | 0.01221 | 0.37911 | 0.39834 | Biso | 1 | C | 0.069041  |  |
| C270 | 1 | 0.0546  | 0.3817  | 0.39933 | Biso | 1 | C | -0.152062 |  |
| H127 | 1 | 0.0613  | 0.3645  | 0.3855  | Biso | 1 | H | 0.137436  |  |
| C271 | 1 | 0.087   | 0.4098  | 0.42078 | Biso | 1 | C | -0.011561 |  |
| C272 | 1 | 0.07713 | 0.43533 | 0.44123 | Biso | 1 | C | -0.116826 |  |
| H128 | 1 | 0.0991  | 0.4543  | 0.4557  | Biso | 1 | H | 0.141406  |  |
| C273 | 1 | 0.03481 | 0.43271 | 0.44024 | Biso | 1 | C | -0.002897 |  |
| C274 | 1 | 0.0023  | 0.4046  | 0.41879 | Biso | 1 | C | -0.150722 |  |
| H129 | 1 | 0.9737  | 0.4028  | 0.4181  | Biso | 1 | H | 0.134237  |  |
| C275 | 1 | 0.8281  | 0.2114  | 0.34756 | Biso | 1 | C | -0.174161 |  |
| H130 | 1 | 0.8448  | 0.2278  | 0.365   | Biso | 1 | H | 0.142413  |  |
| C276 | 1 | 0.9328  | 0.3156  | 0.26563 | Biso | 1 | C | -0.186296 |  |
| H131 | 1 | 0.9548  | 0.3375  | 0.2788  | Biso | 1 | H | 0.144696  |  |
| C277 | 1 | 0.8913  | 0.2743  | 0.2741  | Biso | 1 | C | 0.187274  |  |
| C278 | 1 | 0.0234  | 0.4589  | 0.4631  | Biso | 1 | C | 0.58115   |  |
| C279 | 1 | 0.1284  | 0.4109  | 0.4218  | Biso | 1 | C | 0.604644  |  |
| C280 | 1 | 0.9138  | 0.2926  | 0.33068 | Biso | 1 | C | 0.091372  |  |
| C281 | 1 | 0.9178  | 0.3342  | 0.33871 | Biso | 1 | C | -0.147421 |  |
| H132 | 1 | 0.8989  | 0.3438  | 0.3293  | Biso | 1 | H | 0.122546  |  |
| C282 | 1 | 0.9498  | 0.3618  | 0.3606  | Biso | 1 | C | -0.146753 |  |
| H133 | 1 | 0.9524  | 0.3899  | 0.3661  | Biso | 1 | H | 0.123067  |  |
| C283 | 1 | 0.9776  | 0.3476  | 0.37453 | Biso | 1 | C | 0.065215  |  |
| C284 | 1 | 0.9736  | 0.3059  | 0.36649 | Biso | 1 | C | -0.144195 |  |
| H134 | 1 | 0.9924  | 0.2963  | 0.3759  | Biso | 1 | H | 0.125563  |  |
| C285 | 1 | 0.94169 | 0.27839 | 0.34457 | Biso | 1 | C | -0.147155 |  |
| H135 | 1 | 0.939   | 0.2502  | 0.3391  | Biso | 1 | H | 0.125071  |  |
| O61  | 1 | 0.45037 | 0.46784 | 0.9616  | Biso | 1 | O | -0.524627 |  |
| O62  | 1 | 0.4865  | 0.4308  | 0.97952 | Biso | 1 | O | -0.495752 |  |
| O63  | 1 | 0.4365  | 0.2773  | 0.94039 | Biso | 1 | O | -0.537516 |  |
| O64  | 1 | 0.387   | 0.2498  | 0.90242 | Biso | 1 | O | -0.572068 |  |
| C286 | 1 | 0.262   | 0.3826  | 0.8049  | Biso | 1 | C | -0.097801 |  |
| C287 | 1 | 0.2246  | 0.384   | 0.815   | Biso | 1 | C | 0.177454  |  |
| C288 | 1 | 0.37911 | 0.3669  | 0.89834 | Biso | 1 | C | 0.069017  |  |
| C289 | 1 | 0.3817  | 0.3271  | 0.89933 | Biso | 1 | C | -0.147687 |  |
| H136 | 1 | 0.3645  | 0.3032  | 0.8855  | Biso | 1 | H | 0.13463   |  |
| C290 | 1 | 0.4098  | 0.3228  | 0.92078 | Biso | 1 | C | -0.011669 |  |
| C291 | 1 | 0.43533 | 0.3582  | 0.94123 | Biso | 1 | C | -0.117325 |  |
| H137 | 1 | 0.4543  | 0.3552  | 0.9557  | Biso | 1 | H | 0.141428  |  |
| C292 | 1 | 0.43271 | 0.3979  | 0.94024 | Biso | 1 | C | -0.002652 |  |
| C293 | 1 | 0.4046  | 0.4023  | 0.91879 | Biso | 1 | C | -0.150906 |  |

|      |   |         |         |         |      |   |   |           |
|------|---|---------|---------|---------|------|---|---|-----------|
| H138 | 1 | 0.4028  | 0.4291  | 0.9181  | Biso | 1 | H | 0.134183  |
| C294 | 1 | 0.2114  | 0.3833  | 0.84756 | Biso | 1 | C | -0.173911 |
| H139 | 1 | 0.2278  | 0.383   | 0.865   | Biso | 1 | H | 0.14246   |
| C295 | 1 | 0.3156  | 0.3828  | 0.76563 | Biso | 1 | C | -0.185981 |
| H140 | 1 | 0.3375  | 0.3827  | 0.7788  | Biso | 1 | H | 0.144714  |
| C296 | 1 | 0.2743  | 0.383   | 0.7741  | Biso | 1 | C | 0.187274  |
| C297 | 1 | 0.4589  | 0.4355  | 0.9631  | Biso | 1 | C | 0.581426  |
| C298 | 1 | 0.4109  | 0.2825  | 0.9218  | Biso | 1 | C | 0.604567  |
| C299 | 1 | 0.2926  | 0.3788  | 0.83068 | Biso | 1 | C | 0.091504  |
| C300 | 1 | 0.3342  | 0.4164  | 0.83871 | Biso | 1 | C | -0.147686 |
| H141 | 1 | 0.3438  | 0.4449  | 0.8293  | Biso | 1 | H | 0.12247   |
| C301 | 1 | 0.3618  | 0.412   | 0.8606  | Biso | 1 | C | -0.147047 |
| H142 | 1 | 0.3899  | 0.4375  | 0.8661  | Biso | 1 | H | 0.123159  |
| C302 | 1 | 0.3476  | 0.37    | 0.87453 | Biso | 1 | C | 0.065186  |
| C303 | 1 | 0.3059  | 0.3323  | 0.86649 | Biso | 1 | C | -0.144259 |
| H143 | 1 | 0.2963  | 0.3039  | 0.8759  | Biso | 1 | H | 0.125864  |
| C304 | 1 | 0.27839 | 0.3367  | 0.84457 | Biso | 1 | C | -0.147384 |
| H144 | 1 | 0.2502  | 0.3112  | 0.8391  | Biso | 1 | H | 0.125369  |
| O65  | 1 | 0.53216 | 0.98253 | 0.9616  | Biso | 1 | O | -0.524165 |
| O66  | 1 | 0.5692  | 0.0557  | 0.97952 | Biso | 1 | O | -0.495201 |
| O67  | 1 | 0.7227  | 0.1592  | 0.94039 | Biso | 1 | O | -0.537722 |
| O68  | 1 | 0.7502  | 0.1372  | 0.90242 | Biso | 1 | O | -0.572461 |
| C305 | 1 | 0.6174  | 0.8794  | 0.8049  | Biso | 1 | C | -0.098092 |
| C306 | 1 | 0.616   | 0.8406  | 0.815   | Biso | 1 | C | 0.177502  |
| C307 | 1 | 0.6331  | 0.01221 | 0.89834 | Biso | 1 | C | 0.069198  |
| C308 | 1 | 0.6729  | 0.0546  | 0.89933 | Biso | 1 | C | -0.148459 |
| H145 | 1 | 0.6968  | 0.0613  | 0.8855  | Biso | 1 | H | 0.134825  |
| C309 | 1 | 0.6772  | 0.087   | 0.92078 | Biso | 1 | C | -0.011635 |
| C310 | 1 | 0.6418  | 0.07713 | 0.94123 | Biso | 1 | C | -0.117041 |
| H146 | 1 | 0.6448  | 0.0991  | 0.9557  | Biso | 1 | H | 0.141518  |
| C311 | 1 | 0.6021  | 0.03481 | 0.94024 | Biso | 1 | C | -0.003034 |
| C312 | 1 | 0.5977  | 0.0023  | 0.91879 | Biso | 1 | C | -0.151232 |
| H147 | 1 | 0.5709  | 0.9737  | 0.9181  | Biso | 1 | H | 0.134706  |
| C313 | 1 | 0.6167  | 0.8281  | 0.84756 | Biso | 1 | C | -0.174179 |
| H148 | 1 | 0.617   | 0.8448  | 0.865   | Biso | 1 | H | 0.142324  |
| C314 | 1 | 0.6172  | 0.9328  | 0.76563 | Biso | 1 | C | -0.186232 |
| H149 | 1 | 0.6173  | 0.9548  | 0.7788  | Biso | 1 | H | 0.144498  |
| C315 | 1 | 0.617   | 0.8913  | 0.7741  | Biso | 1 | C | 0.187397  |
| C316 | 1 | 0.5645  | 0.0234  | 0.9631  | Biso | 1 | C | 0.58118   |
| C317 | 1 | 0.7175  | 0.1284  | 0.9218  | Biso | 1 | C | 0.60475   |
| C318 | 1 | 0.6212  | 0.9138  | 0.83068 | Biso | 1 | C | 0.091639  |
| C319 | 1 | 0.5836  | 0.9178  | 0.83871 | Biso | 1 | C | -0.14748  |
| H150 | 1 | 0.5551  | 0.8989  | 0.8293  | Biso | 1 | H | 0.122821  |
| C320 | 1 | 0.588   | 0.9498  | 0.8606  | Biso | 1 | C | -0.146837 |
| H151 | 1 | 0.5625  | 0.9524  | 0.8661  | Biso | 1 | H | 0.123016  |
| C321 | 1 | 0.63    | 0.9776  | 0.87453 | Biso | 1 | C | 0.064812  |
| C322 | 1 | 0.6677  | 0.9736  | 0.86649 | Biso | 1 | C | -0.144327 |
| H152 | 1 | 0.6961  | 0.9924  | 0.8759  | Biso | 1 | H | 0.125652  |
| C323 | 1 | 0.6633  | 0.94169 | 0.84457 | Biso | 1 | C | -0.147129 |
| H153 | 1 | 0.6888  | 0.939   | 0.8391  | Biso | 1 | H | 0.125011  |
| O69  | 1 | 0.01747 | 0.54963 | 0.9616  | Biso | 1 | O | -0.52498  |
| O70  | 1 | 0.9443  | 0.5135  | 0.97952 | Biso | 1 | O | -0.495256 |

|      |   |         |         |         |         |      |   |           |           |
|------|---|---------|---------|---------|---------|------|---|-----------|-----------|
| O71  | 1 | 0.8408  | 0.5635  | 0.94039 | Biso    | 1    | O | -0.537749 |           |
| O72  | 1 | 0.8628  | 0.613   | 0.90242 | Biso    | 1    | O | -0.572437 |           |
| C324 | 1 | 0.1206  | 0.738   | 0.8049  | Biso    | 1    | C | -0.097921 |           |
| C325 | 1 | 0.1594  | 0.7754  | 0.815   | Biso    | 1    | C | 0.177715  |           |
| C326 | 1 | 0.98779 |         | 0.62089 | 0.89834 | Biso | 1 | C         | 0.069072  |
| C327 | 1 | 0.9454  | 0.6183  | 0.89933 | Biso    | 1    | C | -0.148542 |           |
| H154 | 1 | 0.9387  | 0.6355  | 0.8855  | Biso    | 1    | H | 0.1348    |           |
| C328 | 1 | 0.913   | 0.5902  | 0.92078 | Biso    | 1    | C | -0.011537 |           |
| C329 | 1 | 0.92287 |         | 0.56467 | 0.94123 | Biso | 1 | C         | -0.116967 |
| H155 | 1 | 0.9009  | 0.5457  | 0.9557  | Biso    | 1    | H | 0.141659  |           |
| C330 | 1 | 0.96519 |         | 0.56729 | 0.94024 | Biso | 1 | C         | -0.003102 |
| C331 | 1 | 0.9977  | 0.5954  | 0.91879 | Biso    | 1    | C | -0.151258 |           |
| H156 | 1 | 0.0263  | 0.5972  | 0.9181  | Biso    | 1    | H | 0.133884  |           |
| C332 | 1 | 0.1719  | 0.7886  | 0.84756 | Biso    | 1    | C | -0.174055 |           |
| H157 | 1 | 0.1552  | 0.7722  | 0.865   | Biso    | 1    | H | 0.142607  |           |
| C333 | 1 | 0.0672  | 0.6844  | 0.76563 | Biso    | 1    | C | -0.186243 |           |
| H158 | 1 | 0.0452  | 0.6625  | 0.7788  | Biso    | 1    | H | 0.145135  |           |
| C334 | 1 | 0.1087  | 0.7257  | 0.7741  | Biso    | 1    | C | 0.187581  |           |
| C335 | 1 | 0.9766  | 0.5411  | 0.9631  | Biso    | 1    | C | 0.581415  |           |
| C336 | 1 | 0.8716  | 0.5891  | 0.9218  | Biso    | 1    | C | 0.604394  |           |
| C337 | 1 | 0.0862  | 0.7074  | 0.83068 | Biso    | 1    | C | 0.091444  |           |
| C338 | 1 | 0.0822  | 0.6658  | 0.83871 | Biso    | 1    | C | -0.147589 |           |
| H159 | 1 | 0.1011  | 0.6562  | 0.8293  | Biso    | 1    | H | 0.122535  |           |
| C339 | 1 | 0.0502  | 0.6382  | 0.8606  | Biso    | 1    | C | -0.14698  |           |
| H160 | 1 | 0.0476  | 0.6101  | 0.8661  | Biso    | 1    | H | 0.123396  |           |
| C340 | 1 | 0.0224  | 0.6524  | 0.87453 | Biso    | 1    | C | 0.065383  |           |
| C341 | 1 | 0.0264  | 0.6941  | 0.86649 | Biso    | 1    | C | -0.144343 |           |
| H161 | 1 | 0.0076  | 0.7037  | 0.8759  | Biso    | 1    | H | 0.125609  |           |
| C342 | 1 | 0.05831 |         | 0.72161 | 0.84457 | Biso | 1 | C         | -0.147247 |
| H162 | 1 | 0.061   | 0.7498  | 0.8391  | Biso    | 1    | H | 0.124763  |           |
| O73  | 1 | 0.53216 |         | 0.54963 | 0.5384  | Biso | 1 | O         | -0.524542 |
| O74  | 1 | 0.5692  | 0.5135  | 0.52048 | Biso    | 1    | O | -0.495925 |           |
| O75  | 1 | 0.7227  | 0.5635  | 0.55961 | Biso    | 1    | O | -0.538021 |           |
| O76  | 1 | 0.7502  | 0.613   | 0.59758 | Biso    | 1    | O | -0.571915 |           |
| C343 | 1 | 0.6174  | 0.738   | 0.6951  | Biso    | 1    | C | -0.097681 |           |
| C344 | 1 | 0.616   | 0.7754  | 0.685   | Biso    | 1    | C | 0.177363  |           |
| C345 | 1 | 0.6331  | 0.62089 |         | 0.60166 | Biso | 1 | C         | 0.068921  |
| C346 | 1 | 0.6729  | 0.6183  | 0.60067 | Biso    | 1    | C | -0.147285 |           |
| H163 | 1 | 0.6968  | 0.6355  | 0.6145  | Biso    | 1    | H | 0.134565  |           |
| C347 | 1 | 0.6772  | 0.5902  | 0.57922 | Biso    | 1    | C | -0.011897 |           |
| C348 | 1 | 0.6418  | 0.56467 |         | 0.55877 | Biso | 1 | C         | -0.116981 |
| H164 | 1 | 0.6448  | 0.5457  | 0.5443  | Biso    | 1    | H | 0.141128  |           |
| C349 | 1 | 0.6021  | 0.56729 |         | 0.55976 | Biso | 1 | C         | -0.002912 |
| C350 | 1 | 0.5977  | 0.5954  | 0.58121 | Biso    | 1    | C | -0.151128 |           |
| H165 | 1 | 0.5709  | 0.5972  | 0.5819  | Biso    | 1    | H | 0.134394  |           |
| C351 | 1 | 0.6167  | 0.7886  | 0.65244 | Biso    | 1    | C | -0.173616 |           |
| H166 | 1 | 0.617   | 0.7722  | 0.635   | Biso    | 1    | H | 0.142202  |           |
| C352 | 1 | 0.6172  | 0.6844  | 0.73437 | Biso    | 1    | C | -0.186074 |           |
| H167 | 1 | 0.6173  | 0.6625  | 0.7212  | Biso    | 1    | H | 0.144704  |           |
| C353 | 1 | 0.617   | 0.7257  | 0.7259  | Biso    | 1    | C | 0.187284  |           |
| C354 | 1 | 0.5645  | 0.5411  | 0.5369  | Biso    | 1    | C | 0.581504  |           |
| C355 | 1 | 0.7175  | 0.5891  | 0.5782  | Biso    | 1    | C | 0.60458   |           |

|      |   |         |         |         |      |   |   |           |  |
|------|---|---------|---------|---------|------|---|---|-----------|--|
| C356 | 1 | 0.6212  | 0.7074  | 0.66932 | Biso | 1 | C | 0.091434  |  |
| C357 | 1 | 0.5836  | 0.6658  | 0.66129 | Biso | 1 | C | -0.147404 |  |
| H168 | 1 | 0.5551  | 0.6562  | 0.6707  | Biso | 1 | H | 0.122678  |  |
| C358 | 1 | 0.588   | 0.6382  | 0.6394  | Biso | 1 | C | -0.147201 |  |
| H169 | 1 | 0.5625  | 0.6101  | 0.6339  | Biso | 1 | H | 0.123542  |  |
| C359 | 1 | 0.63    | 0.6524  | 0.62547 | Biso | 1 | C | 0.06542   |  |
| C360 | 1 | 0.6677  | 0.6941  | 0.63351 | Biso | 1 | C | -0.144328 |  |
| H170 | 1 | 0.6961  | 0.7037  | 0.6241  | Biso | 1 | H | 0.125445  |  |
| C361 | 1 | 0.6633  | 0.72161 | 0.65543 | Biso | 1 | C | -0.147486 |  |
| H171 | 1 | 0.6888  | 0.7498  | 0.6609  | Biso | 1 | H | 0.125084  |  |
| O77  | 1 | 0.01747 | 0.46784 | 0.5384  | Biso | 1 | O | -0.524717 |  |
| O78  | 1 | 0.9443  | 0.4308  | 0.52048 | Biso | 1 | O | -0.495532 |  |
| O79  | 1 | 0.8408  | 0.2773  | 0.55961 | Biso | 1 | O | -0.537776 |  |
| O80  | 1 | 0.8628  | 0.2498  | 0.59758 | Biso | 1 | O | -0.572445 |  |
| C362 | 1 | 0.1206  | 0.3826  | 0.6951  | Biso | 1 | C | -0.097575 |  |
| C363 | 1 | 0.1594  | 0.384   | 0.685   | Biso | 1 | C | 0.177201  |  |
| C364 | 1 | 0.98779 | 0.3669  | 0.60166 | Biso | 1 | C | 0.069066  |  |
| C365 | 1 | 0.9454  | 0.3271  | 0.60067 | Biso | 1 | C | -0.152135 |  |
| H172 | 1 | 0.9387  | 0.3032  | 0.6145  | Biso | 1 | H | 0.137657  |  |
| C366 | 1 | 0.913   | 0.3228  | 0.57922 | Biso | 1 | C | -0.011794 |  |
| C367 | 1 | 0.92287 | 0.3582  | 0.55877 | Biso | 1 | C | -0.116696 |  |
| H173 | 1 | 0.9009  | 0.3552  | 0.5443  | Biso | 1 | H | 0.141346  |  |
| C368 | 1 | 0.96519 | 0.3979  | 0.55976 | Biso | 1 | C | -0.002791 |  |
| C369 | 1 | 0.9977  | 0.4023  | 0.58121 | Biso | 1 | C | -0.15085  |  |
| H174 | 1 | 0.0263  | 0.4291  | 0.5819  | Biso | 1 | H | 0.134386  |  |
| C370 | 1 | 0.1719  | 0.3833  | 0.65244 | Biso | 1 | C | -0.173775 |  |
| H175 | 1 | 0.1552  | 0.383   | 0.635   | Biso | 1 | H | 0.142121  |  |
| C371 | 1 | 0.0672  | 0.3828  | 0.73437 | Biso | 1 | C | -0.186346 |  |
| H176 | 1 | 0.0452  | 0.3827  | 0.7212  | Biso | 1 | H | 0.144575  |  |
| C372 | 1 | 0.1087  | 0.383   | 0.7259  | Biso | 1 | C | 0.187195  |  |
| C373 | 1 | 0.9766  | 0.4355  | 0.5369  | Biso | 1 | C | 0.581483  |  |
| C374 | 1 | 0.8716  | 0.2825  | 0.5782  | Biso | 1 | C | 0.604712  |  |
| C375 | 1 | 0.0862  | 0.3788  | 0.66932 | Biso | 1 | C | 0.091311  |  |
| C376 | 1 | 0.0822  | 0.4164  | 0.66129 | Biso | 1 | C | -0.147774 |  |
| H177 | 1 | 0.1011  | 0.4449  | 0.6707  | Biso | 1 | H | 0.12273   |  |
| C377 | 1 | 0.0502  | 0.412   | 0.6394  | Biso | 1 | C | -0.146433 |  |
| H178 | 1 | 0.0476  | 0.4375  | 0.6339  | Biso | 1 | H | 0.122727  |  |
| C378 | 1 | 0.0224  | 0.37    | 0.62547 | Biso | 1 | C | 0.065107  |  |
| C379 | 1 | 0.0264  | 0.3323  | 0.63351 | Biso | 1 | C | -0.144376 |  |
| H179 | 1 | 0.0076  | 0.3039  | 0.6241  | Biso | 1 | H | 0.125758  |  |
| C380 | 1 | 0.05831 | 0.3367  | 0.65543 | Biso | 1 | C | -0.146753 |  |
| H180 | 1 | 0.061   | 0.3112  | 0.6609  | Biso | 1 | H | 0.125148  |  |
| O81  | 1 | 0.45037 | 0.98253 | 0.5384  | Biso | 1 | O | -0.523941 |  |
| O82  | 1 | 0.4865  | 0.0557  | 0.52048 | Biso | 1 | O | -0.495531 |  |
| O83  | 1 | 0.4365  | 0.1592  | 0.55961 | Biso | 1 | O | -0.537978 |  |
| O84  | 1 | 0.387   | 0.1372  | 0.59758 | Biso | 1 | O | -0.571542 |  |
| C381 | 1 | 0.262   | 0.8794  | 0.6951  | Biso | 1 | C | -0.097858 |  |
| C382 | 1 | 0.2246  | 0.8406  | 0.685   | Biso | 1 | C | 0.177362  |  |
| C383 | 1 | 0.37911 | 0.01221 | 0.60166 | Biso | 1 | C | 0.069434  |  |
| C384 | 1 | 0.3817  | 0.0546  | 0.60067 | Biso | 1 | C | -0.151913 |  |
| H181 | 1 | 0.3645  | 0.0613  | 0.6145  | Biso | 1 | H | 0.137707  |  |
| C385 | 1 | 0.4098  | 0.087   | 0.57922 | Biso | 1 | C | -0.011752 |  |

|      |   |         |         |         |      |   |   |           |
|------|---|---------|---------|---------|------|---|---|-----------|
| C386 | 1 | 0.43533 | 0.07713 | 0.55877 | Biso | 1 | C | -0.116415 |
| H182 | 1 | 0.4543  | 0.0991  | 0.5443  | Biso | 1 | H | 0.141085  |
| C387 | 1 | 0.43271 | 0.03481 | 0.55976 | Biso | 1 | C | -0.002719 |
| C388 | 1 | 0.4046  | 0.0023  | 0.58121 | Biso | 1 | C | -0.151597 |
| H183 | 1 | 0.4028  | 0.9737  | 0.5819  | Biso | 1 | H | 0.134898  |
| C389 | 1 | 0.2114  | 0.8281  | 0.65244 | Biso | 1 | C | -0.174398 |
| H184 | 1 | 0.2278  | 0.8448  | 0.635   | Biso | 1 | H | 0.142159  |
| C390 | 1 | 0.3156  | 0.9328  | 0.73437 | Biso | 1 | C | -0.186475 |
| H185 | 1 | 0.3375  | 0.9548  | 0.7212  | Biso | 1 | H | 0.144314  |
| C391 | 1 | 0.2743  | 0.8913  | 0.7259  | Biso | 1 | C | 0.18697   |
| C392 | 1 | 0.4589  | 0.0234  | 0.5369  | Biso | 1 | C | 0.581216  |
| C393 | 1 | 0.4109  | 0.1284  | 0.5782  | Biso | 1 | C | 0.604821  |
| C394 | 1 | 0.2926  | 0.9138  | 0.66932 | Biso | 1 | C | 0.091799  |
| C395 | 1 | 0.3342  | 0.9178  | 0.66129 | Biso | 1 | C | -0.147239 |
| H186 | 1 | 0.3438  | 0.8989  | 0.6707  | Biso | 1 | H | 0.122741  |
| C396 | 1 | 0.3618  | 0.9498  | 0.6394  | Biso | 1 | C | -0.146729 |
| H187 | 1 | 0.3899  | 0.9524  | 0.6339  | Biso | 1 | H | 0.123007  |
| C397 | 1 | 0.3476  | 0.9776  | 0.62547 | Biso | 1 | C | 0.065035  |
| C398 | 1 | 0.3059  | 0.9736  | 0.63351 | Biso | 1 | C | -0.144283 |
| H188 | 1 | 0.2963  | 0.9924  | 0.6241  | Biso | 1 | H | 0.125332  |
| C399 | 1 | 0.27839 | 0.94169 | 0.65543 | Biso | 1 | C | -0.147204 |
| H189 | 1 | 0.2502  | 0.939   | 0.6609  | Biso | 1 | H | 0.125228  |
| O85  | 1 | 0.46784 | 0.45037 | 0.0384  | Biso | 1 | O | -0.52474  |
| O86  | 1 | 0.4308  | 0.4865  | 0.02048 | Biso | 1 | O | -0.496086 |
| O87  | 1 | 0.2773  | 0.4365  | 0.05961 | Biso | 1 | O | -0.537801 |
| O88  | 1 | 0.2498  | 0.387   | 0.09758 | Biso | 1 | O | -0.571639 |
| C400 | 1 | 0.3826  | 0.262   | 0.1951  | Biso | 1 | C | -0.097689 |
| C401 | 1 | 0.384   | 0.2246  | 0.185   | Biso | 1 | C | 0.177252  |
| C402 | 1 | 0.3669  | 0.37911 | 0.10166 | Biso | 1 | C | 0.069131  |
| C403 | 1 | 0.3271  | 0.3817  | 0.10067 | Biso | 1 | C | -0.147843 |
| H190 | 1 | 0.3032  | 0.3645  | 0.1145  | Biso | 1 | H | 0.134947  |
| C404 | 1 | 0.3228  | 0.4098  | 0.07922 | Biso | 1 | C | -0.011794 |
| C405 | 1 | 0.3582  | 0.43533 | 0.05877 | Biso | 1 | C | -0.117143 |
| H191 | 1 | 0.3552  | 0.4543  | 0.0443  | Biso | 1 | H | 0.141075  |
| C406 | 1 | 0.3979  | 0.43271 | 0.05976 | Biso | 1 | C | -0.002782 |
| C407 | 1 | 0.4023  | 0.4046  | 0.08121 | Biso | 1 | C | -0.15086  |
| H192 | 1 | 0.4291  | 0.4028  | 0.0819  | Biso | 1 | H | 0.134315  |
| C408 | 1 | 0.3833  | 0.2114  | 0.15244 | Biso | 1 | C | -0.173794 |
| H193 | 1 | 0.383   | 0.2278  | 0.135   | Biso | 1 | H | 0.142093  |
| C409 | 1 | 0.3828  | 0.3156  | 0.23437 | Biso | 1 | C | -0.186358 |
| H194 | 1 | 0.3827  | 0.3375  | 0.2212  | Biso | 1 | H | 0.144548  |
| C410 | 1 | 0.383   | 0.2743  | 0.2259  | Biso | 1 | C | 0.187331  |
| C411 | 1 | 0.4355  | 0.4589  | 0.0369  | Biso | 1 | C | 0.581519  |
| C412 | 1 | 0.2825  | 0.4109  | 0.0782  | Biso | 1 | C | 0.604451  |
| C413 | 1 | 0.3788  | 0.2926  | 0.16932 | Biso | 1 | C | 0.091432  |
| C414 | 1 | 0.4164  | 0.3342  | 0.16129 | Biso | 1 | C | -0.147626 |
| H195 | 1 | 0.4449  | 0.3438  | 0.1707  | Biso | 1 | H | 0.122578  |
| C415 | 1 | 0.412   | 0.3618  | 0.1394  | Biso | 1 | C | -0.146852 |
| H196 | 1 | 0.4375  | 0.3899  | 0.1339  | Biso | 1 | H | 0.12301   |
| C416 | 1 | 0.37    | 0.3476  | 0.12547 | Biso | 1 | C | 0.064986  |
| C417 | 1 | 0.3323  | 0.3059  | 0.13351 | Biso | 1 | C | -0.144219 |
| H197 | 1 | 0.3039  | 0.2963  | 0.1241  | Biso | 1 | H | 0.12567   |

|      |   |         |         |         |      |   |   |           |
|------|---|---------|---------|---------|------|---|---|-----------|
| C418 | 1 | 0.3367  | 0.27839 | 0.15543 | Biso | 1 | C | -0.147274 |
| H198 | 1 | 0.3112  | 0.2502  | 0.1609  | Biso | 1 | H | 0.125408  |
| O89  | 1 | 0.98253 | 0.53216 | 0.0384  | Biso | 1 | O | -0.524404 |
| O90  | 1 | 0.0557  | 0.5692  | 0.02048 | Biso | 1 | O | -0.496028 |
| O91  | 1 | 0.1592  | 0.7227  | 0.05961 | Biso | 1 | O | -0.537257 |
| O92  | 1 | 0.1372  | 0.7502  | 0.09758 | Biso | 1 | O | -0.571491 |
| C419 | 1 | 0.8794  | 0.6174  | 0.1951  | Biso | 1 | C | -0.098063 |
| C420 | 1 | 0.8406  | 0.616   | 0.185   | Biso | 1 | C | 0.177234  |
| C421 | 1 | 0.01221 | 0.6331  | 0.10166 | Biso | 1 | C | 0.069392  |
| C422 | 1 | 0.0546  | 0.6729  | 0.10067 | Biso | 1 | C | -0.14858  |
| H199 | 1 | 0.0613  | 0.6968  | 0.1145  | Biso | 1 | H | 0.134867  |
| C423 | 1 | 0.087   | 0.6772  | 0.07922 | Biso | 1 | C | -0.012516 |
| C424 | 1 | 0.07713 | 0.6418  | 0.05877 | Biso | 1 | C | -0.116681 |
| H200 | 1 | 0.0991  | 0.6448  | 0.0443  | Biso | 1 | H | 0.141217  |
| C425 | 1 | 0.03481 | 0.6021  | 0.05976 | Biso | 1 | C | -0.002685 |
| C426 | 1 | 0.0023  | 0.5977  | 0.08121 | Biso | 1 | C | -0.150151 |
| H201 | 1 | 0.9737  | 0.5709  | 0.0819  | Biso | 1 | H | 0.135002  |
| C427 | 1 | 0.8281  | 0.6167  | 0.15244 | Biso | 1 | C | -0.17421  |
| H202 | 1 | 0.8448  | 0.617   | 0.135   | Biso | 1 | H | 0.142127  |
| C428 | 1 | 0.9328  | 0.6172  | 0.23437 | Biso | 1 | C | -0.18659  |
| H203 | 1 | 0.9548  | 0.6173  | 0.2212  | Biso | 1 | H | 0.144339  |
| C429 | 1 | 0.8913  | 0.617   | 0.2259  | Biso | 1 | C | 0.187273  |
| C430 | 1 | 0.0234  | 0.5645  | 0.0369  | Biso | 1 | C | 0.581042  |
| C431 | 1 | 0.1284  | 0.7175  | 0.0782  | Biso | 1 | C | 0.605318  |
| C432 | 1 | 0.9138  | 0.6212  | 0.16932 | Biso | 1 | C | 0.091758  |
| C433 | 1 | 0.9178  | 0.5836  | 0.16129 | Biso | 1 | C | -0.147212 |
| H204 | 1 | 0.8989  | 0.5551  | 0.1707  | Biso | 1 | H | 0.122982  |
| C434 | 1 | 0.9498  | 0.588   | 0.1394  | Biso | 1 | C | -0.146703 |
| H205 | 1 | 0.9524  | 0.5625  | 0.1339  | Biso | 1 | H | 0.123108  |
| C435 | 1 | 0.9776  | 0.63    | 0.12547 | Biso | 1 | C | 0.064587  |
| C436 | 1 | 0.9736  | 0.6677  | 0.13351 | Biso | 1 | C | -0.144543 |
| H206 | 1 | 0.9924  | 0.6961  | 0.1241  | Biso | 1 | H | 0.125433  |
| C437 | 1 | 0.94169 | 0.6633  | 0.15543 | Biso | 1 | C | -0.147055 |
| H207 | 1 | 0.939   | 0.6888  | 0.1609  | Biso | 1 | H | 0.125087  |
| O93  | 1 | 0.54963 | 0.01747 | 0.0384  | Biso | 1 | O | -0.52466  |
| O94  | 1 | 0.5135  | 0.9443  | 0.02048 | Biso | 1 | O | -0.495286 |
| O95  | 1 | 0.5635  | 0.8408  | 0.05961 | Biso | 1 | O | -0.537664 |
| O96  | 1 | 0.613   | 0.8628  | 0.09758 | Biso | 1 | O | -0.571783 |
| C438 | 1 | 0.738   | 0.1206  | 0.1951  | Biso | 1 | C | -0.098062 |
| C439 | 1 | 0.7754  | 0.1594  | 0.185   | Biso | 1 | C | 0.177481  |
| C440 | 1 | 0.62089 | 0.98779 | 0.10166 | Biso | 1 | C | 0.069523  |
| C441 | 1 | 0.6183  | 0.9454  | 0.10067 | Biso | 1 | C | -0.1484   |
| H208 | 1 | 0.6355  | 0.9387  | 0.1145  | Biso | 1 | H | 0.135167  |
| C442 | 1 | 0.5902  | 0.913   | 0.07922 | Biso | 1 | C | -0.011958 |
| C443 | 1 | 0.56467 | 0.92287 | 0.05877 | Biso | 1 | C | -0.116897 |
| H209 | 1 | 0.5457  | 0.9009  | 0.0443  | Biso | 1 | H | 0.14155   |
| C444 | 1 | 0.56729 | 0.96519 | 0.05976 | Biso | 1 | C | -0.002794 |
| C445 | 1 | 0.5954  | 0.9977  | 0.08121 | Biso | 1 | C | -0.151709 |
| H210 | 1 | 0.5972  | 0.0263  | 0.0819  | Biso | 1 | H | 0.134408  |
| C446 | 1 | 0.7886  | 0.1719  | 0.15244 | Biso | 1 | C | -0.174088 |
| H211 | 1 | 0.7722  | 0.1552  | 0.135   | Biso | 1 | H | 0.14231   |
| C447 | 1 | 0.6844  | 0.0672  | 0.23437 | Biso | 1 | C | -0.186711 |

|      |   |         |         |         |      |   |    |           |  |  |
|------|---|---------|---------|---------|------|---|----|-----------|--|--|
| H212 | 1 | 0.6625  | 0.0452  | 0.2212  | Biso | 1 | H  | 0.144811  |  |  |
| C448 | 1 | 0.7257  | 0.1087  | 0.2259  | Biso | 1 | C  | 0.187303  |  |  |
| C449 | 1 | 0.5411  | 0.9766  | 0.0369  | Biso | 1 | C  | 0.581416  |  |  |
| C450 | 1 | 0.5891  | 0.8716  | 0.0782  | Biso | 1 | C  | 0.604803  |  |  |
| C451 | 1 | 0.7074  | 0.0862  | 0.16932 | Biso | 1 | C  | 0.091759  |  |  |
| C452 | 1 | 0.6658  | 0.0822  | 0.16129 | Biso | 1 | C  | -0.147274 |  |  |
| H213 | 1 | 0.6562  | 0.1011  | 0.1707  | Biso | 1 | H  | 0.122644  |  |  |
| C453 | 1 | 0.6382  | 0.0502  | 0.1394  | Biso | 1 | C  | -0.147029 |  |  |
| H214 | 1 | 0.6101  | 0.0476  | 0.1339  | Biso | 1 | H  | 0.123236  |  |  |
| C454 | 1 | 0.6524  | 0.0224  | 0.12547 | Biso | 1 | C  | 0.06506   |  |  |
| C455 | 1 | 0.6941  | 0.0264  | 0.13351 | Biso | 1 | C  | -0.144211 |  |  |
| H215 | 1 | 0.7037  | 0.0076  | 0.1241  | Biso | 1 | H  | 0.125414  |  |  |
| C456 | 1 | 0.72161 | 0.05831 | 0.15543 | Biso | 1 | C  | -0.147158 |  |  |
| H216 | 1 | 0.7498  | 0.061   | 0.1609  | Biso | 1 | H  | 0.125012  |  |  |
| Cu1  | 1 | 0.47876 | 0.52124 | 0.51088 | Biso | 1 | Cu | 0.80084   |  |  |
| Cu2  | 1 | 0.47876 | 0.95752 | 0.51088 | Biso | 1 | Cu | 0.801961  |  |  |
| Cu3  | 1 | 0.04248 | 0.52124 | 0.51088 | Biso | 1 | Cu | 0.801398  |  |  |
| Cu4  | 1 | 0.52124 | 0.47876 | 0.01088 | Biso | 1 | Cu | 0.800982  |  |  |
| Cu5  | 1 | 0.52124 | 0.04248 | 0.01088 | Biso | 1 | Cu | 0.802025  |  |  |
| Cu6  | 1 | 0.95752 | 0.47876 | 0.01088 | Biso | 1 | Cu | 0.801436  |  |  |
| Cu7  | 1 | 0.52124 | 0.47876 | 0.48912 | Biso | 1 | Cu | 0.800934  |  |  |
| Cu8  | 1 | 0.95752 | 0.47876 | 0.48912 | Biso | 1 | Cu | 0.801429  |  |  |
| Cu9  | 1 | 0.52124 | 0.04248 | 0.48912 | Biso | 1 | Cu | 0.801643  |  |  |
| Cu10 | 1 | 0.47876 | 0.52124 | 0.98912 | Biso | 1 | Cu | 0.800791  |  |  |
| Cu11 | 1 | 0.04248 | 0.52124 | 0.98912 | Biso | 1 | Cu | 0.801109  |  |  |
| Cu12 | 1 | 0.47876 | 0.95752 | 0.98912 | Biso | 1 | Cu | 0.801921  |  |  |
| Cu13 | 1 | 0.38211 | 0.19105 | 0.59988 | Biso | 1 | Cu | 0.904639  |  |  |
| Cu14 | 1 | 0.4431  | 0.22155 | 0.55586 | Biso | 1 | Cu | 0.835082  |  |  |
| O97  | 1 | 0.4374  | 0.2187  | 0.6264  | Biso | 1 | O  | -0.529728 |  |  |
| O98  | 1 | 0.3905  | 0.19525 | 0.5273  | Biso | 1 | O  | -0.490962 |  |  |
| C457 | 1 | 0.3509  | 0.17545 | 0.5366  | Biso | 1 | C  | 0.502579  |  |  |
| H217 | 1 | 0.3271  | 0.16355 | 0.522   | Biso | 1 | H  | 0.070494  |  |  |
| C458 | 1 | 0.4789  | 0.23945 | 0.6184  | Biso | 1 | C  | 0.504341  |  |  |
| H218 | 1 | 0.5023  | 0.25115 | 0.6333  | Biso | 1 | H  | 0.077239  |  |  |
| O99  | 1 | 0.341   | 0.1705  | 0.564   | Biso | 1 | O  | -0.513741 |  |  |
| O100 | 1 | 0.4879  | 0.24395 | 0.5911  | Biso | 1 | O  | -0.495352 |  |  |
| Cu15 | 1 | 0.80895 | 0.19105 | 0.59988 | Biso | 1 | Cu | 0.904197  |  |  |
| Cu16 | 1 | 0.77845 | 0.22155 | 0.55586 | Biso | 1 | Cu | 0.834552  |  |  |
| O101 | 1 | 0.7813  | 0.2187  | 0.6264  | Biso | 1 | O  | -0.530186 |  |  |
| O102 | 1 | 0.80475 | 0.19525 | 0.5273  | Biso | 1 | O  | -0.490868 |  |  |
| C459 | 1 | 0.82455 | 0.17545 | 0.5366  | Biso | 1 | C  | 0.502582  |  |  |
| H219 | 1 | 0.83645 | 0.16355 | 0.522   | Biso | 1 | H  | 0.069767  |  |  |
| C460 | 1 | 0.76055 | 0.23945 | 0.6184  | Biso | 1 | C  | 0.504744  |  |  |
| H220 | 1 | 0.74885 | 0.25115 | 0.6333  | Biso | 1 | H  | 0.076942  |  |  |
| O103 | 1 | 0.8295  | 0.1705  | 0.564   | Biso | 1 | O  | -0.514324 |  |  |
| O104 | 1 | 0.75605 | 0.24395 | 0.5911  | Biso | 1 | O  | -0.495797 |  |  |
| Cu17 | 1 | 0.80895 | 0.61789 | 0.59988 | Biso | 1 | Cu | 0.903725  |  |  |
| Cu18 | 1 | 0.77845 | 0.5569  | 0.55586 | Biso | 1 | Cu | 0.83391   |  |  |
| O105 | 1 | 0.7813  | 0.5626  | 0.6264  | Biso | 1 | O  | -0.530438 |  |  |
| O106 | 1 | 0.80475 | 0.6095  | 0.5273  | Biso | 1 | O  | -0.491083 |  |  |
| C461 | 1 | 0.82455 | 0.6491  | 0.5366  | Biso | 1 | C  | 0.502058  |  |  |
| H221 | 1 | 0.83645 | 0.6729  | 0.522   | Biso | 1 | H  | 0.069681  |  |  |

|      |   |         |         |         |      |   |    |           |  |
|------|---|---------|---------|---------|------|---|----|-----------|--|
| C462 | 1 | 0.76055 | 0.5211  | 0.6184  | Biso | 1 | C  | 0.504155  |  |
| H222 | 1 | 0.74885 | 0.4977  | 0.6333  | Biso | 1 | H  | 0.077054  |  |
| O107 | 1 | 0.8295  | 0.659   | 0.564   | Biso | 1 | O  | -0.514413 |  |
| O108 | 1 | 0.75605 | 0.5121  | 0.5911  | Biso | 1 | O  | -0.495693 |  |
| Cu19 | 1 | 0.61789 | 0.80895 | 0.09988 | Biso | 1 | Cu | 0.904736  |  |
| Cu20 | 1 | 0.5569  | 0.77845 | 0.05586 | Biso | 1 | Cu | 0.835071  |  |
| O109 | 1 | 0.5626  | 0.7813  | 0.1264  | Biso | 1 | O  | -0.529958 |  |
| O110 | 1 | 0.6095  | 0.80475 | 0.0273  | Biso | 1 | O  | -0.490242 |  |
| C463 | 1 | 0.6491  | 0.82455 | 0.0366  | Biso | 1 | C  | 0.502311  |  |
| H223 | 1 | 0.6729  | 0.83645 | 0.022   | Biso | 1 | H  | 0.070374  |  |
| C464 | 1 | 0.5211  | 0.76055 | 0.1184  | Biso | 1 | C  | 0.504293  |  |
| H224 | 1 | 0.4977  | 0.74885 | 0.1333  | Biso | 1 | H  | 0.077345  |  |
| O111 | 1 | 0.659   | 0.8295  | 0.064   | Biso | 1 | O  | -0.513914 |  |
| O112 | 1 | 0.5121  | 0.75605 | 0.0911  | Biso | 1 | O  | -0.495054 |  |
| Cu21 | 1 | 0.19105 | 0.80894 | 0.09988 | Biso | 1 | Cu | 0.906793  |  |
| Cu22 | 1 | 0.22155 | 0.77845 | 0.05586 | Biso | 1 | Cu | 0.837595  |  |
| O113 | 1 | 0.2187  | 0.7813  | 0.1264  | Biso | 1 | O  | -0.528939 |  |
| O114 | 1 | 0.19525 | 0.80475 | 0.0273  | Biso | 1 | O  | -0.488956 |  |
| C465 | 1 | 0.17545 | 0.82455 | 0.0366  | Biso | 1 | C  | 0.50301   |  |
| H225 | 1 | 0.16355 | 0.83645 | 0.022   | Biso | 1 | H  | 0.071222  |  |
| C466 | 1 | 0.23945 | 0.76055 | 0.1184  | Biso | 1 | C  | 0.505135  |  |
| H226 | 1 | 0.25115 | 0.74885 | 0.1333  | Biso | 1 | H  | 0.078209  |  |
| O115 | 1 | 0.1705  | 0.8295  | 0.064   | Biso | 1 | O  | -0.513122 |  |
| O116 | 1 | 0.24395 | 0.75605 | 0.0911  | Biso | 1 | O  | -0.494037 |  |
| Cu23 | 1 | 0.19106 | 0.38211 | 0.09988 | Biso | 1 | Cu | 0.904181  |  |
| Cu24 | 1 | 0.22155 | 0.4431  | 0.05586 | Biso | 1 | Cu | 0.834765  |  |
| O117 | 1 | 0.2187  | 0.4374  | 0.1264  | Biso | 1 | O  | -0.529923 |  |
| O118 | 1 | 0.19525 | 0.3905  | 0.0273  | Biso | 1 | O  | -0.490963 |  |
| C467 | 1 | 0.17545 | 0.3509  | 0.0366  | Biso | 1 | C  | 0.502586  |  |
| H227 | 1 | 0.16355 | 0.3271  | 0.022   | Biso | 1 | H  | 0.070449  |  |
| C468 | 1 | 0.23945 | 0.4789  | 0.1184  | Biso | 1 | C  | 0.504015  |  |
| H228 | 1 | 0.25115 | 0.5023  | 0.1333  | Biso | 1 | H  | 0.076964  |  |
| O119 | 1 | 0.1705  | 0.341   | 0.064   | Biso | 1 | O  | -0.514061 |  |
| O120 | 1 | 0.24395 | 0.4879  | 0.0911  | Biso | 1 | O  | -0.495353 |  |
| Cu25 | 1 | 0.19105 | 0.38211 | 0.40012 | Biso | 1 | Cu | 0.903132  |  |
| Cu26 | 1 | 0.22155 | 0.4431  | 0.44414 | Biso | 1 | Cu | 0.833811  |  |
| O121 | 1 | 0.2187  | 0.4374  | 0.3736  | Biso | 1 | O  | -0.530786 |  |
| O122 | 1 | 0.19525 | 0.3905  | 0.4727  | Biso | 1 | O  | -0.491561 |  |
| C469 | 1 | 0.17545 | 0.3509  | 0.4634  | Biso | 1 | C  | 0.502498  |  |
| H229 | 1 | 0.16355 | 0.3271  | 0.478   | Biso | 1 | H  | 0.069944  |  |
| C470 | 1 | 0.23945 | 0.4789  | 0.3816  | Biso | 1 | C  | 0.503888  |  |
| H230 | 1 | 0.25115 | 0.5023  | 0.3667  | Biso | 1 | H  | 0.076437  |  |
| O123 | 1 | 0.1705  | 0.341   | 0.436   | Biso | 1 | O  | -0.514696 |  |
| O124 | 1 | 0.24395 | 0.4879  | 0.4089  | Biso | 1 | O  | -0.495667 |  |
| Cu27 | 1 | 0.19106 | 0.80895 | 0.40012 | Biso | 1 | Cu | 0.904024  |  |
| Cu28 | 1 | 0.22155 | 0.77845 | 0.44414 | Biso | 1 | Cu | 0.834603  |  |
| O125 | 1 | 0.2187  | 0.7813  | 0.3736  | Biso | 1 | O  | -0.530506 |  |
| O126 | 1 | 0.19525 | 0.80475 | 0.4727  | Biso | 1 | O  | -0.490466 |  |
| C471 | 1 | 0.17545 | 0.82455 | 0.4634  | Biso | 1 | C  | 0.502621  |  |
| H231 | 1 | 0.16355 | 0.83645 | 0.478   | Biso | 1 | H  | 0.06989   |  |
| C472 | 1 | 0.23945 | 0.76055 | 0.3816  | Biso | 1 | C  | 0.504631  |  |
| H232 | 1 | 0.25115 | 0.74885 | 0.3667  | Biso | 1 | H  | 0.076671  |  |

|      |   |         |         |         |         |         |      |           |           |           |          |
|------|---|---------|---------|---------|---------|---------|------|-----------|-----------|-----------|----------|
| O127 | 1 | 0.1705  | 0.8295  | 0.436   | Biso    | 1       | O    | -0.514723 |           |           |          |
| O128 | 1 | 0.24395 |         | 0.75605 |         | 0.4089  | Biso | 1         | O         | -0.495352 |          |
| Cu29 | 1 | 0.61789 |         | 0.80894 |         | 0.40012 |      | Biso      | 1         | Cu        | 0.903868 |
| Cu30 | 1 | 0.5569  | 0.77845 |         | 0.44414 |         | Biso | 1         | Cu        | 0.834571  |          |
| O129 | 1 | 0.5626  | 0.7813  | 0.3736  | Biso    | 1       | O    | -0.530529 |           |           |          |
| O130 | 1 | 0.6095  | 0.80475 |         | 0.4727  | Biso    | 1    | O         | -0.490486 |           |          |
| C473 | 1 | 0.6491  | 0.82455 |         | 0.4634  | Biso    | 1    | C         | 0.502151  |           |          |
| H233 | 1 | 0.6729  | 0.83645 |         | 0.478   | Biso    | 1    | H         | 0.070105  |           |          |
| C474 | 1 | 0.5211  | 0.76055 |         | 0.3816  | Biso    | 1    | C         | 0.504162  |           |          |
| H234 | 1 | 0.4977  | 0.74885 |         | 0.3667  | Biso    | 1    | H         | 0.076889  |           |          |
| O131 | 1 | 0.659   | 0.8295  | 0.436   | Biso    | 1       | O    | -0.514506 |           |           |          |
| O132 | 1 | 0.5121  | 0.75605 |         | 0.4089  | Biso    | 1    | O         | -0.495095 |           |          |
| Cu31 | 1 | 0.80895 |         | 0.61789 |         | 0.90012 |      | Biso      | 1         | Cu        | 0.902618 |
| Cu32 | 1 | 0.77845 |         | 0.5569  | 0.94414 |         | Biso | 1         | Cu        | 0.833201  |          |
| O133 | 1 | 0.7813  | 0.5626  | 0.8736  | Biso    | 1       | O    | -0.531196 |           |           |          |
| O134 | 1 | 0.80475 |         | 0.6095  | 0.9727  | Biso    | 1    | O         | -0.491033 |           |          |
| C475 | 1 | 0.82455 |         | 0.6491  | 0.9634  | Biso    | 1    | C         | 0.501996  |           |          |
| H235 | 1 | 0.83645 |         | 0.6729  | 0.978   | Biso    | 1    | H         | 0.069441  |           |          |
| C476 | 1 | 0.76055 |         | 0.5211  | 0.8816  | Biso    | 1    | C         | 0.503914  |           |          |
| H236 | 1 | 0.74885 |         | 0.4977  | 0.8667  | Biso    | 1    | H         | 0.076385  |           |          |
| O135 | 1 | 0.8295  | 0.659   | 0.936   | Biso    | 1       | O    | -0.515412 |           |           |          |
| O136 | 1 | 0.75605 |         | 0.5121  | 0.9089  | Biso    | 1    | O         | -0.495608 |           |          |
| Cu33 | 1 | 0.80895 |         | 0.19105 |         | 0.90012 |      | Biso      | 1         | Cu        | 0.903899 |
| Cu34 | 1 | 0.77845 |         | 0.22155 |         | 0.94414 |      | Biso      | 1         | Cu        | 0.834859 |
| O137 | 1 | 0.7813  | 0.2187  | 0.8736  | Biso    | 1       | O    | -0.530679 |           |           |          |
| O138 | 1 | 0.80475 |         | 0.19525 |         | 0.9727  | Biso | 1         | O         | -0.490483 |          |
| C477 | 1 | 0.82455 |         | 0.17545 |         | 0.9634  | Biso | 1         | C         | 0.502752  |          |
| H237 | 1 | 0.83645 |         | 0.16355 |         | 0.978   | Biso | 1         | H         | 0.070035  |          |
| C478 | 1 | 0.76055 |         | 0.23945 |         | 0.8816  | Biso | 1         | C         | 0.504615  |          |
| H238 | 1 | 0.74885 |         | 0.25115 |         | 0.8667  | Biso | 1         | H         | 0.076849  |          |
| O139 | 1 | 0.8295  | 0.1705  | 0.936   | Biso    | 1       | O    | -0.51473  |           |           |          |
| O140 | 1 | 0.75605 |         | 0.24395 |         | 0.9089  | Biso | 1         | O         | -0.495068 |          |
| Cu35 | 1 | 0.38211 |         | 0.19105 |         | 0.90012 |      | Biso      | 1         | Cu        | 0.903937 |
| Cu36 | 1 | 0.4431  | 0.22155 |         | 0.94414 |         | Biso | 1         | Cu        | 0.834663  |          |
| O141 | 1 | 0.4374  | 0.2187  | 0.8736  | Biso    | 1       | O    | -0.53012  |           |           |          |
| O142 | 1 | 0.3905  | 0.19525 |         | 0.9727  | Biso    | 1    | O         | -0.49091  |           |          |
| C479 | 1 | 0.3509  | 0.17545 |         | 0.9634  | Biso    | 1    | C         | 0.50261   |           |          |
| H239 | 1 | 0.3271  | 0.16355 |         | 0.978   | Biso    | 1    | H         | 0.070253  |           |          |
| C480 | 1 | 0.4789  | 0.23945 |         | 0.8816  | Biso    | 1    | C         | 0.503841  |           |          |
| H240 | 1 | 0.5023  | 0.25115 |         | 0.8667  | Biso    | 1    | H         | 0.076872  |           |          |
| O143 | 1 | 0.341   | 0.1705  | 0.936   | Biso    | 1       | O    | -0.514511 |           |           |          |
| O144 | 1 | 0.4879  | 0.24395 |         | 0.9089  | Biso    | 1    | O         | -0.49528  |           |          |
| N1   | 1 | 0.1923  | 0.3846  | 0.704   | Biso    | 1       | N    | -0.355283 |           |           |          |
| N2   | 1 | 0.6154  | 0.8077  | 0.704   | Biso    | 1       | N    | -0.355318 |           |           |          |
| N3   | 1 | 0.1923  | 0.8077  | 0.704   | Biso    | 1       | N    | -0.355574 |           |           |          |
| N4   | 1 | 0.8077  | 0.6154  | 0.204   | Biso    | 1       | N    | -0.355494 |           |           |          |
| N5   | 1 | 0.3846  | 0.1923  | 0.204   | Biso    | 1       | N    | -0.355551 |           |           |          |
| N6   | 1 | 0.8077  | 0.1923  | 0.204   | Biso    | 1       | N    | -0.355806 |           |           |          |
| N7   | 1 | 0.3846  | 0.1923  | 0.296   | Biso    | 1       | N    | -0.355746 |           |           |          |
| N8   | 1 | 0.8077  | 0.6154  | 0.296   | Biso    | 1       | N    | -0.355791 |           |           |          |
| N9   | 1 | 0.8077  | 0.1923  | 0.296   | Biso    | 1       | N    | -0.356013 |           |           |          |
| N10  | 1 | 0.6154  | 0.8077  | 0.796   | Biso    | 1       | N    | -0.356008 |           |           |          |

|      |   |         |        |         |      |      |      |           |    |                    |
|------|---|---------|--------|---------|------|------|------|-----------|----|--------------------|
| N11  | 1 | 0.1923  | 0.3846 | 0.796   | Biso | 1    | N    | -0.355983 |    |                    |
| N12  | 1 | 0.1923  | 0.8077 | 0.796   | Biso | 1    | N    | -0.35628  |    |                    |
| N13  | 1 | 0.2508  | 0.3853 | 0.75    | Biso | 1    | N    | -0.341176 |    |                    |
| N14  | 1 | 0.6147  | 0.8655 | 0.75    | Biso | 1    | N    | -0.340701 |    |                    |
| N15  | 1 | 0.1345  | 0.7492 | 0.75    | Biso | 1    | N    | -0.341677 |    |                    |
| N16  | 1 | 0.7492  | 0.6147 | 0.25    | Biso | 1    | N    | -0.341308 |    |                    |
| N17  | 1 | 0.3853  | 0.1345 | 0.25    | Biso | 1    | N    | -0.341059 |    |                    |
| N18  | 1 | 0.8655  | 0.2508 | 0.25    | Biso | 1    | N    | -0.341085 |    |                    |
| N19  | 1 | 0.3853  | 0.2508 | 0.25    | Biso | 1    | N    | -0.341152 |    |                    |
| N20  | 1 | 0.8655  | 0.6147 | 0.25    | Biso | 1    | N    | -0.340898 |    |                    |
| N21  | 1 | 0.7492  | 0.1345 | 0.25    | Biso | 1    | N    | -0.341389 |    |                    |
| N22  | 1 | 0.6147  | 0.7492 | 0.75    | Biso | 1    | N    | -0.34162  |    |                    |
| N23  | 1 | 0.1345  | 0.3853 | 0.75    | Biso | 1    | N    | -0.341137 |    |                    |
| N24  | 1 | 0.2508  | 0.8655 | 0.75    | Biso | 1    | N    | -0.34083  |    |                    |
| Cu37 | 1 | 0.19193 |        | 0.38385 |      | 0.75 | Biso | 1         | Cu | 0.604083           |
| Cu38 | 1 | 0.61615 |        | 0.80807 |      | 0.75 | Biso | 1         | Cu | 0.60409            |
| Cu39 | 1 | 0.19193 |        | 0.80807 |      | 0.75 | Biso | 1         | Cu | 0.6041779999999994 |
| Cu40 | 1 | 0.80808 |        | 0.61615 |      | 0.25 | Biso | 1         | Cu | 0.60357            |
| Cu41 | 1 | 0.38385 |        | 0.19193 |      | 0.25 | Biso | 1         | Cu | 0.603589           |
| Cu42 | 1 | 0.80808 |        | 0.19192 |      | 0.25 | Biso | 1         | Cu | 0.604045           |

```

data_BEPMIU_clean
_audit_creation_date 2014-07-02
_audit_creation_method 'Materials Studio'
_symmetry_space_group_name_H-M 'P1'
_symmetry_Int_Tables_number 1
_symmetry_cell_setting triclinic
loop_
_symmetry_equiv_pos_as_xyz
  x y z
_cell_length_a 10.2652
_cell_length_b 17.5285
_cell_length_c 17.5285
_cell_angle_alpha 120
_cell_angle_beta 90
_cell_angle_gamma 90
loop_
_atom_site_label
_atom_site_type_symbol
_atom_site_fract_x
_atom_site_fract_y
_atom_site_fract_z
_atom_site_U_iso_or_equiv
_atom_site_adp_type
_atom_site_occupancy
_atom_site_charge
Zn1 Zn 0.00685 0.46439 0.92459 0.01267 Uiso 1 0.71023
Zn2 Zn 0.67352 0.4602 0.53561 0.01267 Uiso 1 0.709985
Zn3 Zn 0.34018 0.07541 0.5398 0.01267 Uiso 1 0.709836
Zn4 Zn 0.50685 0.53561 0.07541 0.01267 Uiso 1 0.710118
Zn5 Zn 0.17352 0.5398 0.46439 0.01267 Uiso 1 0.709986
Zn6 Zn 0.84018 0.92459 0.4602 0.01267 Uiso 1 0.709894
H1 H 0.9749 0.4269 0.3219 0.01267 Uiso 1 0.099646
H2 H 0.9305 0.3836 0.1787 0.01267 Uiso 1 0.141503
H3 H 0.2264 0.535 0.1819 0.01267 Uiso 1 0.135822
H4 H 0.2722 0.567 0.3222 0.01267 Uiso 1 0.108996
H5 H 0.1109 0.3909 0.0305 0.01267 Uiso 1 0.13497
H6 H 0.9614 0.3991 0.0513 0.01267 Uiso 1 0.115725
H7 H 0.9252 0.5697 0.1653 0.01267 Uiso 1 0.075823
H8 H 0.0427 0.6823 0.1622 0.01267 Uiso 1 0.159209
H9 H 0.8945 0.6994 0.155 0.01267 Uiso 1 0.180368
H10 H 0.9826 0.6582 0.0707 0.01267 Uiso 1 0.162198
H11 H 0.1142 0.5357 0.0729 0.01267 Uiso 1 0.262469
H12 H 0.64157 0.895 0.5731 0.01267 Uiso 1 0.09992
H13 H 0.59717 0.7951 0.6164 0.01267 Uiso 1 0.141665
H14 H 0.89307 0.6469 0.465 0.01267 Uiso 1 0.13598
H15 H 0.93887 0.7552 0.433 0.01267 Uiso 1 0.108531
H16 H 0.77757 0.6396 0.6091 0.01267 Uiso 1 0.134697
H17 H 0.62807 0.6522 0.6009 0.01267 Uiso 1 0.114891
H18 H 0.59187 0.5956 0.4303 0.01267 Uiso 1 0.07585
H19 H 0.70937 0.4799 0.3177 0.01267 Uiso 1 0.158428
H20 H 0.56117 0.4556 0.3006 0.01267 Uiso 1 0.181094
H21 H 0.64927 0.4125 0.3418 0.01267 Uiso 1 0.162413

```

|     |   |         |        |        |         |      |   |           |
|-----|---|---------|--------|--------|---------|------|---|-----------|
| H22 | H | 0.78087 | 0.5372 | 0.4643 | 0.01267 | Uiso | 1 | 0.262626  |
| H23 | H | 0.30823 | 0.6781 | 0.105  | 0.01267 | Uiso | 1 | 0.099196  |
| H24 | H | 0.26383 | 0.8213 | 0.2049 | 0.01267 | Uiso | 1 | 0.140974  |
| H25 | H | 0.55973 | 0.8181 | 0.3531 | 0.01267 | Uiso | 1 | 0.13577   |
| H26 | H | 0.60553 | 0.6778 | 0.2448 | 0.01267 | Uiso | 1 | 0.107843  |
| H27 | H | 0.44423 | 0.9695 | 0.3604 | 0.01267 | Uiso | 1 | 0.134427  |
| H28 | H | 0.29473 | 0.9487 | 0.3478 | 0.01267 | Uiso | 1 | 0.115109  |
| H29 | H | 0.25853 | 0.8347 | 0.4044 | 0.01267 | Uiso | 1 | 0.075643  |
| H30 | H | 0.37603 | 0.8378 | 0.5201 | 0.01267 | Uiso | 1 | 0.158723  |
| H31 | H | 0.22783 | 0.845  | 0.5444 | 0.01267 | Uiso | 1 | 0.181036  |
| H32 | H | 0.31593 | 0.9293 | 0.5875 | 0.01267 | Uiso | 1 | 0.1624    |
| H33 | H | 0.44753 | 0.9271 | 0.4628 | 0.01267 | Uiso | 1 | 0.263034  |
| H34 | H | 0.4749  | 0.5731 | 0.6781 | 0.01267 | Uiso | 1 | 0.099545  |
| H35 | H | 0.4305  | 0.6164 | 0.8213 | 0.01267 | Uiso | 1 | 0.141512  |
| H36 | H | 0.7264  | 0.465  | 0.8181 | 0.01267 | Uiso | 1 | 0.135906  |
| H37 | H | 0.7722  | 0.433  | 0.6778 | 0.01267 | Uiso | 1 | 0.109007  |
| H38 | H | 0.6109  | 0.6091 | 0.9695 | 0.01267 | Uiso | 1 | 0.135102  |
| H39 | H | 0.4614  | 0.6009 | 0.9487 | 0.01267 | Uiso | 1 | 0.115746  |
| H40 | H | 0.4252  | 0.4303 | 0.8347 | 0.01267 | Uiso | 1 | 0.075475  |
| H41 | H | 0.5427  | 0.3177 | 0.8378 | 0.01267 | Uiso | 1 | 0.159162  |
| H42 | H | 0.3945  | 0.3006 | 0.845  | 0.01267 | Uiso | 1 | 0.180379  |
| H43 | H | 0.4826  | 0.3418 | 0.9293 | 0.01267 | Uiso | 1 | 0.162443  |
| H44 | H | 0.6142  | 0.4643 | 0.9271 | 0.01267 | Uiso | 1 | 0.262495  |
| H45 | H | 0.14157 | 0.105  | 0.4269 | 0.01267 | Uiso | 1 | 0.099917  |
| H46 | H | 0.09717 | 0.2049 | 0.3836 | 0.01267 | Uiso | 1 | 0.14156   |
| H47 | H | 0.39307 | 0.3531 | 0.535  | 0.01267 | Uiso | 1 | 0.136054  |
| H48 | H | 0.43887 | 0.2448 | 0.567  | 0.01267 | Uiso | 1 | 0.108665  |
| H49 | H | 0.27757 | 0.3604 | 0.3909 | 0.01267 | Uiso | 1 | 0.134574  |
| H50 | H | 0.12807 | 0.3478 | 0.3991 | 0.01267 | Uiso | 1 | 0.114844  |
| H51 | H | 0.09187 | 0.4044 | 0.5697 | 0.01267 | Uiso | 1 | 0.075886  |
| H52 | H | 0.20937 | 0.5201 | 0.6823 | 0.01267 | Uiso | 1 | 0.158672  |
| H53 | H | 0.06117 | 0.5444 | 0.6994 | 0.01267 | Uiso | 1 | 0.181302  |
| H54 | H | 0.14927 | 0.5875 | 0.6582 | 0.01267 | Uiso | 1 | 0.162453  |
| H55 | H | 0.28087 | 0.4628 | 0.5357 | 0.01267 | Uiso | 1 | 0.262761  |
| H56 | H | 0.80823 | 0.3219 | 0.895  | 0.01267 | Uiso | 1 | 0.099344  |
| H57 | H | 0.76383 | 0.1787 | 0.7951 | 0.01267 | Uiso | 1 | 0.141005  |
| H58 | H | 0.05973 | 0.1819 | 0.6469 | 0.01267 | Uiso | 1 | 0.135642  |
| H59 | H | 0.10553 | 0.3222 | 0.7552 | 0.01267 | Uiso | 1 | 0.10777   |
| H60 | H | 0.94423 | 0.0305 | 0.6396 | 0.01267 | Uiso | 1 | 0.134461  |
| H61 | H | 0.79473 | 0.0513 | 0.6522 | 0.01267 | Uiso | 1 | 0.115114  |
| H62 | H | 0.75853 | 0.1653 | 0.5956 | 0.01267 | Uiso | 1 | 0.075796  |
| H63 | H | 0.87603 | 0.1622 | 0.4799 | 0.01267 | Uiso | 1 | 0.158844  |
| H64 | H | 0.72783 | 0.155  | 0.4556 | 0.01267 | Uiso | 1 | 0.180967  |
| H65 | H | 0.81593 | 0.0707 | 0.4125 | 0.01267 | Uiso | 1 | 0.162246  |
| H66 | H | 0.94753 | 0.0729 | 0.5372 | 0.01267 | Uiso | 1 | 0.262922  |
| C1  | C | 0.0274  | 0.4474 | 0.2927 | 0.01267 | Uiso | 1 | 0.073104  |
| C2  | C | 0.9991  | 0.4222 | 0.2073 | 0.01267 | Uiso | 1 | -0.206273 |
| C3  | C | 0.0734  | 0.4543 | 0.163  | 0.01267 | Uiso | 1 | 0.161409  |
| C4  | C | 0.1758  | 0.5109 | 0.2087 | 0.01267 | Uiso | 1 | -0.184564 |
| C5  | C | 0.2014  | 0.5309 | 0.2932 | 0.01267 | Uiso | 1 | 0.098488  |
| C6  | C | 0.0438  | 0.4304 | 0.0688 | 0.01267 | Uiso | 1 | -0.141498 |
| C7  | C | 0.9341  | 0.5685 | 0.109  | 0.01267 | Uiso | 1 | 0.035975  |

|     |   |         |        |        |         |         |      |           |           |
|-----|---|---------|--------|--------|---------|---------|------|-----------|-----------|
| C8  | C | 0.8051  | 0.5385 | 0.0576 | 0.01267 | Uiso    | 1    | 0.588469  |           |
| C9  | C | 0.9664  | 0.6607 | 0.1258 | 0.01267 | Uiso    | 1    | -0.508026 |           |
| C10 | C | 0.69407 |        | 0.8453 | 0.5526  | 0.01267 | Uiso | 1         | 0.074626  |
| C11 | C | 0.66577 |        | 0.7851 | 0.5778  | 0.01267 | Uiso | 1         | -0.207529 |
| C12 | C | 0.74007 |        | 0.7087 | 0.5457  | 0.01267 | Uiso | 1         | 0.162277  |
| C13 | C | 0.84247 |        | 0.6978 | 0.4891  | 0.01267 | Uiso | 1         | -0.185437 |
| C14 | C | 0.86807 |        | 0.7623 | 0.4691  | 0.01267 | Uiso | 1         | 0.100565  |
| C15 | C | 0.71047 |        | 0.6384 | 0.5696  | 0.01267 | Uiso | 1         | -0.139731 |
| C16 | C | 0.60077 |        | 0.5405 | 0.4315  | 0.01267 | Uiso | 1         | 0.035564  |
| C17 | C | 0.47177 |        | 0.5191 | 0.4615  | 0.01267 | Uiso | 1         | 0.587686  |
| C18 | C | 0.63307 |        | 0.4651 | 0.3393  | 0.01267 | Uiso | 1         | -0.507893 |
| C19 | C | 0.36073 |        | 0.7073 | 0.1547  | 0.01267 | Uiso | 1         | 0.074376  |
| C20 | C | 0.33243 |        | 0.7927 | 0.2149  | 0.01267 | Uiso | 1         | -0.207392 |
| C21 | C | 0.40673 |        | 0.837  | 0.2913  | 0.01267 | Uiso | 1         | 0.162416  |
| C22 | C | 0.50913 |        | 0.7913 | 0.3022  | 0.01267 | Uiso | 1         | -0.185297 |
| C23 | C | 0.53473 |        | 0.7068 | 0.2377  | 0.01267 | Uiso | 1         | 0.101106  |
| C24 | C | 0.37713 |        | 0.9312 | 0.3616  | 0.01267 | Uiso | 1         | -0.140478 |
| C25 | C | 0.26743 |        | 0.891  | 0.4595  | 0.01267 | Uiso | 1         | 0.037417  |
| C26 | C | 0.13843 |        | 0.9424 | 0.4809  | 0.01267 | Uiso | 1         | 0.586436  |
| C27 | C | 0.29973 |        | 0.8742 | 0.5349  | 0.01267 | Uiso | 1         | -0.508322 |
| C28 | C | 0.5274  | 0.5526 | 0.7073 | 0.01267 | Uiso    | 1    | 0.072934  |           |
| C29 | C | 0.4991  | 0.5778 | 0.7927 | 0.01267 | Uiso    | 1    | -0.206157 |           |
| C30 | C | 0.5734  | 0.5457 | 0.837  | 0.01267 | Uiso    | 1    | 0.1615    |           |
| C31 | C | 0.6758  | 0.4891 | 0.7913 | 0.01267 | Uiso    | 1    | -0.184422 |           |
| C32 | C | 0.7014  | 0.4691 | 0.7068 | 0.01267 | Uiso    | 1    | 0.098282  |           |
| C33 | C | 0.5438  | 0.5696 | 0.9312 | 0.01267 | Uiso    | 1    | -0.14168  |           |
| C34 | C | 0.4341  | 0.4315 | 0.891  | 0.01267 | Uiso    | 1    | 0.036261  |           |
| C35 | C | 0.3051  | 0.4615 | 0.9424 | 0.01267 | Uiso    | 1    | 0.588242  |           |
| C36 | C | 0.4664  | 0.3393 | 0.8742 | 0.01267 | Uiso    | 1    | -0.50826  |           |
| C37 | C | 0.19407 |        | 0.1547 | 0.4474  | 0.01267 | Uiso | 1         | 0.074351  |
| C38 | C | 0.16577 |        | 0.2149 | 0.4222  | 0.01267 | Uiso | 1         | -0.207454 |
| C39 | C | 0.24007 |        | 0.2913 | 0.4543  | 0.01267 | Uiso | 1         | 0.162215  |
| C40 | C | 0.34247 |        | 0.3022 | 0.5109  | 0.01267 | Uiso | 1         | -0.185543 |
| C41 | C | 0.36807 |        | 0.2377 | 0.5309  | 0.01267 | Uiso | 1         | 0.100601  |
| C42 | C | 0.21047 |        | 0.3616 | 0.4304  | 0.01267 | Uiso | 1         | -0.13975  |
| C43 | C | 0.10077 |        | 0.4595 | 0.5685  | 0.01267 | Uiso | 1         | 0.035628  |
| C44 | C | 0.97177 |        | 0.4809 | 0.5385  | 0.01267 | Uiso | 1         | 0.587696  |
| C45 | C | 0.13307 |        | 0.5349 | 0.6607  | 0.01267 | Uiso | 1         | -0.508242 |
| C46 | C | 0.86073 |        | 0.2927 | 0.8453  | 0.01267 | Uiso | 1         | 0.074532  |
| C47 | C | 0.83243 |        | 0.2073 | 0.7851  | 0.01267 | Uiso | 1         | -0.207343 |
| C48 | C | 0.90673 |        | 0.163  | 0.7087  | 0.01267 | Uiso | 1         | 0.162395  |
| C49 | C | 0.00913 |        | 0.2087 | 0.6978  | 0.01267 | Uiso | 1         | -0.185505 |
| C50 | C | 0.03473 |        | 0.2932 | 0.7623  | 0.01267 | Uiso | 1         | 0.101298  |
| C51 | C | 0.87713 |        | 0.0688 | 0.6384  | 0.01267 | Uiso | 1         | -0.140341 |
| C52 | C | 0.76743 |        | 0.109  | 0.5405  | 0.01267 | Uiso | 1         | 0.037337  |
| C53 | C | 0.63843 |        | 0.0576 | 0.5191  | 0.01267 | Uiso | 1         | 0.586437  |
| C54 | C | 0.79973 |        | 0.1258 | 0.4651  | 0.01267 | Uiso | 1         | -0.508366 |
| N1  | N | 0.0365  | 0.5069 | 0.0566 | 0.01267 | Uiso    | 1    | -0.32951  |           |
| N2  | N | 0.1276  | 0.5003 | 0.3364 | 0.01267 | Uiso    | 1    | -0.197741 |           |
| N3  | N | 0.70317 |        | 0.5497 | 0.4931  | 0.01267 | Uiso | 1         | -0.330395 |
| N4  | N | 0.79427 |        | 0.8361 | 0.4997  | 0.01267 | Uiso | 1         | -0.200059 |
| N5  | N | 0.36983 |        | 0.9434 | 0.4503  | 0.01267 | Uiso | 1         | -0.330546 |

|     |    |         |         |         |         |      |   |           |
|-----|----|---------|---------|---------|---------|------|---|-----------|
| N6  | N  | 0.46093 | 0.6636  | 0.1639  | 0.01267 | Uiso | 1 | -0.198533 |
| N7  | N  | 0.5365  | 0.4931  | 0.9434  | 0.01267 | Uiso | 1 | -0.329446 |
| N8  | N  | 0.6276  | 0.4997  | 0.6636  | 0.01267 | Uiso | 1 | -0.19772  |
| N9  | N  | 0.20317 | 0.4503  | 0.5069  | 0.01267 | Uiso | 1 | -0.330568 |
| N10 | N  | 0.29427 | 0.1639  | 0.5003  | 0.01267 | Uiso | 1 | -0.199785 |
| N11 | N  | 0.86983 | 0.0566  | 0.5497  | 0.01267 | Uiso | 1 | -0.330578 |
| N12 | N  | 0.96093 | 0.3364  | 0.8361  | 0.01267 | Uiso | 1 | -0.19865  |
| Cl1 | Cl | 0.997   | 0.55565 | 0.87054 | 0.01267 | Uiso | 1 | -0.563455 |
| Cl2 | Cl | 0.66367 | 0.31489 | 0.44435 | 0.01267 | Uiso | 1 | -0.563627 |
| Cl3 | Cl | 0.33033 | 0.12946 | 0.68511 | 0.01267 | Uiso | 1 | -0.563485 |
| Cl4 | Cl | 0.497   | 0.44435 | 0.12946 | 0.01267 | Uiso | 1 | -0.563367 |
| Cl5 | Cl | 0.16367 | 0.68511 | 0.55565 | 0.01267 | Uiso | 1 | -0.563546 |
| Cl6 | Cl | 0.83033 | 0.87054 | 0.31489 | 0.01267 | Uiso | 1 | -0.563617 |
| O1  | O  | 0.704   | 0.5699  | 0.1039  | 0.01267 | Uiso | 1 | -0.566858 |
| O2  | O  | 0.8094  | 0.4874  | 0.9771  | 0.01267 | Uiso | 1 | -0.546388 |
| O3  | O  | 0.37067 | 0.534   | 0.4301  | 0.01267 | Uiso | 1 | -0.567168 |
| O4  | O  | 0.47607 | 0.4897  | 0.5126  | 0.01267 | Uiso | 1 | -0.544972 |
| O5  | O  | 0.03733 | 0.8961  | 0.466   | 0.01267 | Uiso | 1 | -0.566292 |
| O6  | O  | 0.14273 | 0.0229  | 0.5103  | 0.01267 | Uiso | 1 | -0.545482 |
| O7  | O  | 0.204   | 0.4301  | 0.8961  | 0.01267 | Uiso | 1 | -0.567008 |
| O8  | O  | 0.3094  | 0.5126  | 0.0229  | 0.01267 | Uiso | 1 | -0.545997 |
| O9  | O  | 0.87067 | 0.466   | 0.5699  | 0.01267 | Uiso | 1 | -0.566966 |
| O10 | O  | 0.97607 | 0.5103  | 0.4874  | 0.01267 | Uiso | 1 | -0.545155 |
| O11 | O  | 0.53733 | 0.1039  | 0.534   | 0.01267 | Uiso | 1 | -0.566294 |
| O12 | O  | 0.64273 | 0.9771  | 0.4897  | 0.01267 | Uiso | 1 | -0.545516 |

```

data_BEPMAM_clean
_audit_creation_date      2014-07-02
_audit_creation_method    'Materials Studio'
_symmetry_space_group_name_H-M  'P1'
_symmetry_Int_Tables_number  1
_symmetry_cell_setting    triclinic
loop_
_symmetry_equiv_pos_as_xyz
  x,y,z
_cell_length_a            10.1716
_cell_length_b            17.5911
_cell_length_c            17.5911
_cell_angle_alpha        120.0000
_cell_angle_beta         90.0000
_cell_angle_gamma        90.0000
loop_
_atom_site_label
_atom_site_type_symbol
_atom_site_fract_x
_atom_site_fract_y
_atom_site_fract_z
_atom_site_U_iso_or_equiv
_atom_site_adp_type
_atom_site_occupancy
_atom_site_charge
Zn1  Zn   0.86909 0.54333 0.46797 0.01267 Uiso  1   0.400995
Zn2  Zn   0.53576 0.92464 0.45667 0.01267 Uiso  1   0.403537
Zn3  Zn   0.20242 0.53203 0.07536 0.01267 Uiso  1   0.408386
Zn4  Zn   0.36909 0.45667 0.53203 0.01267 Uiso  1   0.400164
Zn5  Zn   0.03576 0.07536 0.54333 0.01267 Uiso  1   0.404784
Zn6  Zn   0.70242 0.46797 0.92464 0.01267 Uiso  1   0.406939
H1   H    0.5852  0.4772  0.7789  0.01267 Uiso  1   0.099963
H2   H    0.6317  0.5229  0.6782  0.01267 Uiso  1   0.111331
H3   H    0.9799  0.6101  0.7948  0.01267 Uiso  1   0.126024
H4   H    0.9277  0.5625  0.8901  0.01267 Uiso  1   0.082929
H5   H    0.7914  0.6338  0.653   0.01267 Uiso  1   0.123601
H6   H    0.9395  0.6148  0.6629  0.01267 Uiso  1   0.114074
H7   H    0.9654  0.4519  0.6134  0.01267 Uiso  1   0.079415
H8   H    0.8028  0.3492  0.508   0.01267 Uiso  1   0.16482
H9   H    0.9421  0.3118  0.5093  0.01267 Uiso  1   0.168719
H10  H    0.9073  0.3353  0.4367  0.01267 Uiso  1   0.156648
H11  H    0.7655  0.4855  0.5584  0.01267 Uiso  1   0.258986
H12  H    0.25187 0.3017  0.5228  0.01267 Uiso  1   0.100067
H13  H    0.29837 0.1553  0.4771  0.01267 Uiso  1   0.109227
H14  H    0.64657 0.1847  0.3899  0.01267 Uiso  1   0.126428
H15  H    0.59437 0.3276  0.4375  0.01267 Uiso  1   0.083518
H16  H    0.45807 0.0192  0.3662  0.01267 Uiso  1   0.123761
H17  H    0.60617 0.0481  0.3852  0.01267 Uiso  1   0.114417
H18  H    0.63207 0.1615  0.5481  0.01267 Uiso  1   0.078378
H19  H    0.46947 0.1588  0.6508  0.01267 Uiso  1   0.164619
H20  H    0.60877 0.1975  0.6882  0.01267 Uiso  1   0.170161

```

|     |   |         |        |        |         |      |   |           |
|-----|---|---------|--------|--------|---------|------|---|-----------|
| H21 | H | 0.57397 | 0.1014 | 0.6647 | 0.01267 | Uiso | 1 | 0.156633  |
| H22 | H | 0.43217 | 0.0729 | 0.5145 | 0.01267 | Uiso | 1 | 0.259259  |
| H23 | H | 0.91853 | 0.2211 | 0.6983 | 0.01267 | Uiso | 1 | 0.099712  |
| H24 | H | 0.96503 | 0.3218 | 0.8447 | 0.01267 | Uiso | 1 | 0.109028  |
| H25 | H | 0.31323 | 0.2052 | 0.8153 | 0.01267 | Uiso | 1 | 0.125999  |
| H26 | H | 0.26103 | 0.1099 | 0.6724 | 0.01267 | Uiso | 1 | 0.082964  |
| H27 | H | 0.12473 | 0.347  | 0.9808 | 0.01267 | Uiso | 1 | 0.123215  |
| H28 | H | 0.27283 | 0.3371 | 0.9519 | 0.01267 | Uiso | 1 | 0.114086  |
| H29 | H | 0.29873 | 0.3866 | 0.8385 | 0.01267 | Uiso | 1 | 0.079286  |
| H30 | H | 0.13613 | 0.492  | 0.8412 | 0.01267 | Uiso | 1 | 0.16468   |
| H31 | H | 0.27543 | 0.4907 | 0.8025 | 0.01267 | Uiso | 1 | 0.169882  |
| H32 | H | 0.24063 | 0.5633 | 0.8986 | 0.01267 | Uiso | 1 | 0.156585  |
| H33 | H | 0.09883 | 0.4416 | 0.9271 | 0.01267 | Uiso | 1 | 0.259232  |
| H34 | H | 0.0852  | 0.5228 | 0.2211 | 0.01267 | Uiso | 1 | 0.099878  |
| H35 | H | 0.1317  | 0.4771 | 0.3218 | 0.01267 | Uiso | 1 | 0.111322  |
| H36 | H | 0.4799  | 0.3899 | 0.2052 | 0.01267 | Uiso | 1 | 0.126073  |
| H37 | H | 0.4277  | 0.4375 | 0.1099 | 0.01267 | Uiso | 1 | 0.083002  |
| H38 | H | 0.2914  | 0.3662 | 0.347  | 0.01267 | Uiso | 1 | 0.123612  |
| H39 | H | 0.4395  | 0.3852 | 0.3371 | 0.01267 | Uiso | 1 | 0.114156  |
| H40 | H | 0.4654  | 0.5481 | 0.3866 | 0.01267 | Uiso | 1 | 0.079446  |
| H41 | H | 0.3028  | 0.6508 | 0.492  | 0.01267 | Uiso | 1 | 0.164794  |
| H42 | H | 0.4421  | 0.6882 | 0.4907 | 0.01267 | Uiso | 1 | 0.168692  |
| H43 | H | 0.4073  | 0.6647 | 0.5633 | 0.01267 | Uiso | 1 | 0.156616  |
| H44 | H | 0.2655  | 0.5145 | 0.4416 | 0.01267 | Uiso | 1 | 0.258884  |
| H45 | H | 0.75187 | 0.6983 | 0.4772 | 0.01267 | Uiso | 1 | 0.100106  |
| H46 | H | 0.79837 | 0.8447 | 0.5229 | 0.01267 | Uiso | 1 | 0.109117  |
| H47 | H | 0.14657 | 0.8153 | 0.6101 | 0.01267 | Uiso | 1 | 0.126587  |
| H48 | H | 0.09437 | 0.6724 | 0.5625 | 0.01267 | Uiso | 1 | 0.083552  |
| H49 | H | 0.95807 | 0.9808 | 0.6338 | 0.01267 | Uiso | 1 | 0.123647  |
| H50 | H | 0.10617 | 0.9519 | 0.6148 | 0.01267 | Uiso | 1 | 0.114449  |
| H51 | H | 0.13207 | 0.8385 | 0.4519 | 0.01267 | Uiso | 1 | 0.078397  |
| H52 | H | 0.96947 | 0.8412 | 0.3492 | 0.01267 | Uiso | 1 | 0.164619  |
| H53 | H | 0.10877 | 0.8025 | 0.3118 | 0.01267 | Uiso | 1 | 0.17028   |
| H54 | H | 0.07397 | 0.8986 | 0.3353 | 0.01267 | Uiso | 1 | 0.156646  |
| H55 | H | 0.93217 | 0.9271 | 0.4855 | 0.01267 | Uiso | 1 | 0.259311  |
| H56 | H | 0.41853 | 0.7789 | 0.3017 | 0.01267 | Uiso | 1 | 0.099633  |
| H57 | H | 0.46503 | 0.6782 | 0.1553 | 0.01267 | Uiso | 1 | 0.109265  |
| H58 | H | 0.81323 | 0.7948 | 0.1847 | 0.01267 | Uiso | 1 | 0.125959  |
| H59 | H | 0.76103 | 0.8901 | 0.3276 | 0.01267 | Uiso | 1 | 0.082899  |
| H60 | H | 0.62473 | 0.653  | 0.0192 | 0.01267 | Uiso | 1 | 0.123286  |
| H61 | H | 0.77283 | 0.6629 | 0.0481 | 0.01267 | Uiso | 1 | 0.113997  |
| H62 | H | 0.79873 | 0.6134 | 0.1615 | 0.01267 | Uiso | 1 | 0.079205  |
| H63 | H | 0.63613 | 0.508  | 0.1588 | 0.01267 | Uiso | 1 | 0.164767  |
| H64 | H | 0.77543 | 0.5093 | 0.1975 | 0.01267 | Uiso | 1 | 0.16984   |
| H65 | H | 0.74063 | 0.4367 | 0.1014 | 0.01267 | Uiso | 1 | 0.15665   |
| H66 | H | 0.59883 | 0.5584 | 0.0729 | 0.01267 | Uiso | 1 | 0.259264  |
| C1  | C | 0.6656  | 0.5037 | 0.7818 | 0.01267 | Uiso | 1 | 0.052422  |
| C2  | C | 0.6939  | 0.5309 | 0.7203 | 0.01267 | Uiso | 1 | -0.228244 |
| C3  | C | 0.8138  | 0.5696 | 0.7225 | 0.01267 | Uiso | 1 | 0.099198  |
| C4  | C | 0.8998  | 0.5823 | 0.7892 | 0.01267 | Uiso | 1 | -0.219294 |
| C5  | C | 0.8673  | 0.5543 | 0.8469 | 0.01267 | Uiso | 1 | 0.01649   |
| C6  | C | 0.8515  | 0.5904 | 0.6519 | 0.01267 | Uiso | 1 | -0.13059  |

|     |   |         |        |        |         |      |   |           |
|-----|---|---------|--------|--------|---------|------|---|-----------|
| C7  | C | 0.9448  | 0.4437 | 0.5554 | 0.01267 | Uiso | 1 | 0.048034  |
| C8  | C | 0.0694  | 0.46   | 0.5159 | 0.01267 | Uiso | 1 | 0.549139  |
| C9  | C | 0.8947  | 0.3517 | 0.4971 | 0.01267 | Uiso | 1 | -0.508085 |
| C10 | C | 0.33227 | 0.2781 | 0.4963 | 0.01267 | Uiso | 1 | 0.056481  |
| C11 | C | 0.36057 | 0.1894 | 0.4691 | 0.01267 | Uiso | 1 | -0.229099 |
| C12 | C | 0.48047 | 0.1529 | 0.4304 | 0.01267 | Uiso | 1 | 0.102368  |
| C13 | C | 0.56647 | 0.2069 | 0.4177 | 0.01267 | Uiso | 1 | -0.218556 |
| C14 | C | 0.53397 | 0.2926 | 0.4457 | 0.01267 | Uiso | 1 | 0.015357  |
| C15 | C | 0.51817 | 0.0615 | 0.4096 | 0.01267 | Uiso | 1 | -0.1293   |
| C16 | C | 0.61147 | 0.1117 | 0.5563 | 0.01267 | Uiso | 1 | 0.04954   |
| C17 | C | 0.73607 | 0.0559 | 0.54   | 0.01267 | Uiso | 1 | 0.547046  |
| C18 | C | 0.56137 | 0.1454 | 0.6483 | 0.01267 | Uiso | 1 | -0.507775 |
| C19 | C | 0.99893 | 0.2182 | 0.7219 | 0.01267 | Uiso | 1 | 0.05587   |
| C20 | C | 0.02723 | 0.2797 | 0.8106 | 0.01267 | Uiso | 1 | -0.230755 |
| C21 | C | 0.14713 | 0.2775 | 0.8471 | 0.01267 | Uiso | 1 | 0.099997  |
| C22 | C | 0.23313 | 0.2108 | 0.7931 | 0.01267 | Uiso | 1 | -0.218351 |
| C23 | C | 0.20063 | 0.1531 | 0.7074 | 0.01267 | Uiso | 1 | 0.012025  |
| C24 | C | 0.18483 | 0.3481 | 0.9385 | 0.01267 | Uiso | 1 | -0.129545 |
| C25 | C | 0.27813 | 0.4446 | 0.8883 | 0.01267 | Uiso | 1 | 0.048907  |
| C26 | C | 0.40273 | 0.4841 | 0.9441 | 0.01267 | Uiso | 1 | 0.548341  |
| C27 | C | 0.22803 | 0.5029 | 0.8546 | 0.01267 | Uiso | 1 | -0.507996 |
| C28 | C | 0.1656  | 0.4963 | 0.2182 | 0.01267 | Uiso | 1 | 0.052369  |
| C29 | C | 0.1939  | 0.4691 | 0.2797 | 0.01267 | Uiso | 1 | -0.228289 |
| C30 | C | 0.3138  | 0.4304 | 0.2775 | 0.01267 | Uiso | 1 | 0.099289  |
| C31 | C | 0.3998  | 0.4177 | 0.2108 | 0.01267 | Uiso | 1 | -0.219343 |
| C32 | C | 0.3673  | 0.4457 | 0.1531 | 0.01267 | Uiso | 1 | 0.016882  |
| C33 | C | 0.3515  | 0.4096 | 0.3481 | 0.01267 | Uiso | 1 | -0.130704 |
| C34 | C | 0.4448  | 0.5563 | 0.4446 | 0.01267 | Uiso | 1 | 0.047974  |
| C35 | C | 0.5694  | 0.54   | 0.4841 | 0.01267 | Uiso | 1 | 0.549276  |
| C36 | C | 0.3947  | 0.6483 | 0.5029 | 0.01267 | Uiso | 1 | -0.5081   |
| C37 | C | 0.83227 | 0.7219 | 0.5037 | 0.01267 | Uiso | 1 | 0.05664   |
| C38 | C | 0.86057 | 0.8106 | 0.5309 | 0.01267 | Uiso | 1 | -0.229175 |
| C39 | C | 0.98047 | 0.8471 | 0.5696 | 0.01267 | Uiso | 1 | 0.102345  |
| C40 | C | 0.06647 | 0.7931 | 0.5823 | 0.01267 | Uiso | 1 | -0.21867  |
| C41 | C | 0.03397 | 0.7074 | 0.5543 | 0.01267 | Uiso | 1 | 0.015213  |
| C42 | C | 0.01817 | 0.9385 | 0.5904 | 0.01267 | Uiso | 1 | -0.129239 |
| C43 | C | 0.11147 | 0.8883 | 0.4437 | 0.01267 | Uiso | 1 | 0.049557  |
| C44 | C | 0.23607 | 0.9441 | 0.46   | 0.01267 | Uiso | 1 | 0.546816  |
| C45 | C | 0.06137 | 0.8546 | 0.3517 | 0.01267 | Uiso | 1 | -0.507914 |
| C46 | C | 0.49893 | 0.7818 | 0.2781 | 0.01267 | Uiso | 1 | 0.055855  |
| C47 | C | 0.52723 | 0.7203 | 0.1894 | 0.01267 | Uiso | 1 | -0.230786 |
| C48 | C | 0.64713 | 0.7225 | 0.1529 | 0.01267 | Uiso | 1 | 0.100057  |
| C49 | C | 0.73313 | 0.7892 | 0.2069 | 0.01267 | Uiso | 1 | -0.218547 |
| C50 | C | 0.70063 | 0.8469 | 0.2926 | 0.01267 | Uiso | 1 | 0.012191  |
| C51 | C | 0.68483 | 0.6519 | 0.0615 | 0.01267 | Uiso | 1 | -0.129513 |
| C52 | C | 0.77813 | 0.5554 | 0.1117 | 0.01267 | Uiso | 1 | 0.049006  |
| C53 | C | 0.90273 | 0.5159 | 0.0559 | 0.01267 | Uiso | 1 | 0.548264  |
| C54 | C | 0.72803 | 0.4971 | 0.1454 | 0.01267 | Uiso | 1 | -0.508141 |
| N1  | N | 0.8467  | 0.5098 | 0.5648 | 0.01267 | Uiso | 1 | -0.308847 |
| N2  | N | 0.7517  | 0.5152 | 0.8437 | 0.01267 | Uiso | 1 | -0.206906 |
| N3  | N | 0.51337 | 0.055  | 0.4902 | 0.01267 | Uiso | 1 | -0.308626 |
| N4  | N | 0.41837 | 0.3285 | 0.4848 | 0.01267 | Uiso | 1 | -0.203461 |

|     |   |         |        |        |         |      |   |           |
|-----|---|---------|--------|--------|---------|------|---|-----------|
| N5  | N | 0.18003 | 0.4352 | 0.945  | 0.01267 | Uiso | 1 | -0.309828 |
| N6  | N | 0.08503 | 0.1563 | 0.6715 | 0.01267 | Uiso | 1 | -0.205647 |
| N7  | N | 0.3467  | 0.4902 | 0.4352 | 0.01267 | Uiso | 1 | -0.308685 |
| N8  | N | 0.2517  | 0.4848 | 0.1563 | 0.01267 | Uiso | 1 | -0.207297 |
| N9  | N | 0.01337 | 0.945  | 0.5098 | 0.01267 | Uiso | 1 | -0.308854 |
| N10 | N | 0.91837 | 0.6715 | 0.5152 | 0.01267 | Uiso | 1 | -0.203749 |
| N11 | N | 0.68003 | 0.5648 | 0.055  | 0.01267 | Uiso | 1 | -0.30965  |
| N12 | N | 0.58503 | 0.8437 | 0.3285 | 0.01267 | Uiso | 1 | -0.205347 |
| O1  | O | 0.1727  | 0.4234 | 0.5254 | 0.01267 | Uiso | 1 | -0.552625 |
| O2  | O | 0.0633  | 0.5032 | 0.4778 | 0.01267 | Uiso | 1 | -0.504388 |
| O3  | O | 0.83937 | 0.102  | 0.5766 | 0.01267 | Uiso | 1 | -0.553407 |
| O4  | O | 0.72997 | 0.9746 | 0.4968 | 0.01267 | Uiso | 1 | -0.504175 |
| O5  | O | 0.50603 | 0.4746 | 0.898  | 0.01267 | Uiso | 1 | -0.551516 |
| O6  | O | 0.39663 | 0.5222 | 0.0254 | 0.01267 | Uiso | 1 | -0.504176 |
| O7  | O | 0.6727  | 0.5766 | 0.4746 | 0.01267 | Uiso | 1 | -0.552724 |
| O8  | O | 0.5633  | 0.4968 | 0.5222 | 0.01267 | Uiso | 1 | -0.504375 |
| O9  | O | 0.33937 | 0.898  | 0.4234 | 0.01267 | Uiso | 1 | -0.553155 |
| O10 | O | 0.22997 | 0.0254 | 0.5032 | 0.01267 | Uiso | 1 | -0.504337 |
| O11 | O | 0.00603 | 0.5254 | 0.102  | 0.01267 | Uiso | 1 | -0.551705 |
| O12 | O | 0.89663 | 0.4778 | 0.9746 | 0.01267 | Uiso | 1 | -0.503862 |

```

data_BEPNOB_clean
_audit_creation_date      2014-07-02
_audit_creation_method    'Materials Studio'
_symmetry_space_group_name_H-M  'P1'
_symmetry_Int_Tables_number  1
_symmetry_cell_setting    triclinic
loop_
_symmetry_equiv_pos_as_xyz
  x,y,z
_cell_length_a            10.1716
_cell_length_b            17.5911
_cell_length_c            17.5911
_cell_angle_alpha         120.0000
_cell_angle_beta          90.0000
_cell_angle_gamma         90.0000
loop_
_atom_site_label
_atom_site_type_symbol
_atom_site_fract_x
_atom_site_fract_y
_atom_site_fract_z
_atom_site_U_iso_or_equiv
_atom_site_adp_type
_atom_site_occupancy
_atom_site_charge
Zn1  Zn   0.86646   0.45663   0.53194   0.01267   Uiso  1   0.749
Zn2  Zn   0.53313   0.07531   0.54337   0.01267   Uiso  1   0.749
Zn3  Zn   0.19979   0.46806   0.92469   0.01267   Uiso  1   0.749
Zn4  Zn   0.36646   0.54337   0.46806   0.01267   Uiso  1   0.749
Zn5  Zn   0.03313   0.92469   0.45663   0.01267   Uiso  1   0.749
Zn6  Zn   0.69979   0.53194   0.07531   0.01267   Uiso  1   0.749
H1   H    0.5832 0.5253 0.2235 0.01267   Uiso  1   0.106
H2   H    0.9267 0.4382 0.1107 0.01267   Uiso  1   0.102
H3   H    0.7883 0.3657 0.3463 0.01267   Uiso  1   0.118
H4   H    0.9366 0.3844 0.3365 0.01267   Uiso  1   0.081
H5   H    0.9625 0.5485 0.3872 0.01267   Uiso  1   0.071
H6   H    0.9762 0.3897 0.2056 0.01267   Uiso  1   0.130
H7   H    0.6284 0.4723 0.3192 0.01267   Uiso  1   0.134
H8   H    0.8003 0.6504 0.4906 0.01267   Uiso  1   0.161
H9   H    0.9404 0.6881 0.4918 0.01267   Uiso  1   0.150
H10  H    0.9018 0.6639 0.5633 0.01267   Uiso  1   0.147
H11  H    0.24987   0.6982 0.4747 0.01267   Uiso  1   0.106
H12  H    0.59337   0.6725 0.5618 0.01267   Uiso  1   0.102
H13  H    0.45497   0.9806 0.6343 0.01267   Uiso  1   0.118
H14  H    0.60327   0.9521 0.6156 0.01267   Uiso  1   0.081
H15  H    0.62917   0.8387 0.4515 0.01267   Uiso  1   0.071
H16  H    0.64287   0.8159 0.6103 0.01267   Uiso  1   0.130
H17  H    0.29507   0.8469 0.5277 0.01267   Uiso  1   0.134
H18  H    0.46697   0.8402 0.3496 0.01267   Uiso  1   0.161
H19  H    0.60707   0.8037 0.3119 0.01267   Uiso  1   0.150
H20  H    0.56847   0.8994 0.3361 0.01267   Uiso  1   0.147
H21  H    0.91653   0.7765 0.3018 0.01267   Uiso  1   0.106

```

|     |   |         |        |        |         |      |   |        |
|-----|---|---------|--------|--------|---------|------|---|--------|
| H22 | H | 0.26003 | 0.8893 | 0.3275 | 0.01267 | Uiso | 1 | 0.103  |
| H23 | H | 0.12163 | 0.6537 | 0.0194 | 0.01267 | Uiso | 1 | 0.118  |
| H24 | H | 0.26993 | 0.6635 | 0.0479 | 0.01267 | Uiso | 1 | 0.081  |
| H25 | H | 0.29583 | 0.6128 | 0.1613 | 0.01267 | Uiso | 1 | 0.071  |
| H26 | H | 0.30953 | 0.7944 | 0.1841 | 0.01267 | Uiso | 1 | 0.130  |
| H27 | H | 0.96173 | 0.6808 | 0.1531 | 0.01267 | Uiso | 1 | 0.134  |
| H28 | H | 0.13363 | 0.5094 | 0.1598 | 0.01267 | Uiso | 1 | 0.161  |
| H29 | H | 0.27373 | 0.5082 | 0.1963 | 0.01267 | Uiso | 1 | 0.150  |
| H30 | H | 0.23513 | 0.4367 | 0.1006 | 0.01267 | Uiso | 1 | 0.147  |
| H31 | H | 0.0832  | 0.4747 | 0.7765 | 0.01267 | Uiso | 1 | 0.106  |
| H32 | H | 0.4267  | 0.5618 | 0.8893 | 0.01267 | Uiso | 1 | 0.102  |
| H33 | H | 0.2883  | 0.6343 | 0.6537 | 0.01267 | Uiso | 1 | 0.118  |
| H34 | H | 0.4366  | 0.6156 | 0.6635 | 0.01267 | Uiso | 1 | 0.081  |
| H35 | H | 0.4625  | 0.4515 | 0.6128 | 0.01267 | Uiso | 1 | 0.071  |
| H36 | H | 0.4762  | 0.6103 | 0.7944 | 0.01267 | Uiso | 1 | 0.130  |
| H37 | H | 0.1284  | 0.5277 | 0.6808 | 0.01267 | Uiso | 1 | 0.134  |
| H38 | H | 0.3003  | 0.3496 | 0.5094 | 0.01267 | Uiso | 1 | 0.161  |
| H39 | H | 0.4404  | 0.3119 | 0.5082 | 0.01267 | Uiso | 1 | 0.150  |
| H40 | H | 0.4018  | 0.3361 | 0.4367 | 0.01267 | Uiso | 1 | 0.147  |
| H41 | H | 0.74987 | 0.3018 | 0.5253 | 0.01267 | Uiso | 1 | 0.106  |
| H42 | H | 0.09337 | 0.3275 | 0.4382 | 0.01267 | Uiso | 1 | 0.102  |
| H43 | H | 0.95497 | 0.0194 | 0.3657 | 0.01267 | Uiso | 1 | 0.118  |
| H44 | H | 0.10327 | 0.0479 | 0.3844 | 0.01267 | Uiso | 1 | 0.081  |
| H45 | H | 0.12917 | 0.1613 | 0.5485 | 0.01267 | Uiso | 1 | 0.071  |
| H46 | H | 0.14287 | 0.1841 | 0.3897 | 0.01267 | Uiso | 1 | 0.130  |
| H47 | H | 0.79507 | 0.1531 | 0.4723 | 0.01267 | Uiso | 1 | 0.134  |
| H48 | H | 0.96697 | 0.1598 | 0.6504 | 0.01267 | Uiso | 1 | 0.161  |
| H49 | H | 0.10707 | 0.1963 | 0.6881 | 0.01267 | Uiso | 1 | 0.150  |
| H50 | H | 0.06847 | 0.1006 | 0.6639 | 0.01267 | Uiso | 1 | 0.147  |
| H51 | H | 0.41653 | 0.2235 | 0.6982 | 0.01267 | Uiso | 1 | 0.106  |
| H52 | H | 0.76003 | 0.1107 | 0.6725 | 0.01267 | Uiso | 1 | 0.103  |
| H53 | H | 0.62163 | 0.3463 | 0.9806 | 0.01267 | Uiso | 1 | 0.118  |
| H54 | H | 0.76993 | 0.3365 | 0.9521 | 0.01267 | Uiso | 1 | 0.081  |
| H55 | H | 0.79583 | 0.3872 | 0.8387 | 0.01267 | Uiso | 1 | 0.071  |
| H56 | H | 0.80953 | 0.2056 | 0.8159 | 0.01267 | Uiso | 1 | 0.130  |
| H57 | H | 0.46173 | 0.3192 | 0.8469 | 0.01267 | Uiso | 1 | 0.134  |
| H58 | H | 0.63363 | 0.4906 | 0.8402 | 0.01267 | Uiso | 1 | 0.161  |
| H59 | H | 0.77373 | 0.4918 | 0.8037 | 0.01267 | Uiso | 1 | 0.150  |
| H60 | H | 0.73513 | 0.5633 | 0.8994 | 0.01267 | Uiso | 1 | 0.147  |
| C1  | C | 0.6626  | 0.497  | 0.2188 | 0.01267 | Uiso | 1 | 0.056  |
| C2  | C | 0.8655  | 0.446  | 0.1533 | 0.01267 | Uiso | 1 | 0.066  |
| C3  | C | 0.8487  | 0.409  | 0.3475 | 0.01267 | Uiso | 1 | -0.159 |
| C4  | C | 0.9421  | 0.5567 | 0.4453 | 0.01267 | Uiso | 1 | 0.033  |
| C5  | C | 0.8964  | 0.4179 | 0.2112 | 0.01267 | Uiso | 1 | -0.218 |
| C6  | C | 0.067   | 0.5401 | 0.484  | 0.01267 | Uiso | 1 | 0.592  |
| C7  | C | 0.6916  | 0.467  | 0.2786 | 0.01267 | Uiso | 1 | -0.186 |
| C8  | C | 0.8114  | 0.4306 | 0.2773 | 0.01267 | Uiso | 1 | 0.194  |
| C9  | C | 0.8916  | 0.6479 | 0.5029 | 0.01267 | Uiso | 1 | -0.506 |
| C10 | C | 0.32927 | 0.7218 | 0.503  | 0.01267 | Uiso | 1 | 0.056  |
| C11 | C | 0.53217 | 0.7073 | 0.554  | 0.01267 | Uiso | 1 | 0.066  |
| C12 | C | 0.51537 | 0.9385 | 0.591  | 0.01267 | Uiso | 1 | -0.159 |
| C13 | C | 0.60877 | 0.8886 | 0.4433 | 0.01267 | Uiso | 1 | 0.033  |

|     |   |         |        |        |         |      |   |        |
|-----|---|---------|--------|--------|---------|------|---|--------|
| C14 | C | 0.56307 | 0.7933 | 0.5821 | 0.01267 | Uiso | 1 | -0.218 |
| C15 | C | 0.73367 | 0.9439 | 0.4599 | 0.01267 | Uiso | 1 | 0.591  |
| C16 | C | 0.35827 | 0.8116 | 0.533  | 0.01267 | Uiso | 1 | -0.185 |
| C17 | C | 0.47807 | 0.8467 | 0.5694 | 0.01267 | Uiso | 1 | 0.194  |
| C18 | C | 0.55827 | 0.855  | 0.3521 | 0.01267 | Uiso | 1 | -0.506 |
| C19 | C | 0.99593 | 0.7812 | 0.2782 | 0.01267 | Uiso | 1 | 0.056  |
| C20 | C | 0.19883 | 0.8467 | 0.2927 | 0.01267 | Uiso | 1 | 0.066  |
| C21 | C | 0.18203 | 0.6525 | 0.0615 | 0.01267 | Uiso | 1 | -0.159 |
| C22 | C | 0.27543 | 0.5547 | 0.1114 | 0.01267 | Uiso | 1 | 0.033  |
| C23 | C | 0.22973 | 0.7888 | 0.2067 | 0.01267 | Uiso | 1 | -0.218 |
| C24 | C | 0.40033 | 0.516  | 0.0561 | 0.01267 | Uiso | 1 | 0.592  |
| C25 | C | 0.02493 | 0.7214 | 0.1884 | 0.01267 | Uiso | 1 | -0.185 |
| C26 | C | 0.14473 | 0.7227 | 0.1533 | 0.01267 | Uiso | 1 | 0.194  |
| C27 | C | 0.22493 | 0.4971 | 0.145  | 0.01267 | Uiso | 1 | -0.506 |
| C28 | C | 0.1626  | 0.503  | 0.7812 | 0.01267 | Uiso | 1 | 0.056  |
| C29 | C | 0.3655  | 0.554  | 0.8467 | 0.01267 | Uiso | 1 | 0.066  |
| C30 | C | 0.3487  | 0.591  | 0.6525 | 0.01267 | Uiso | 1 | -0.159 |
| C31 | C | 0.4421  | 0.4433 | 0.5547 | 0.01267 | Uiso | 1 | 0.033  |
| C32 | C | 0.3964  | 0.5821 | 0.7888 | 0.01267 | Uiso | 1 | -0.218 |
| C33 | C | 0.567   | 0.4599 | 0.516  | 0.01267 | Uiso | 1 | 0.592  |
| C34 | C | 0.1916  | 0.533  | 0.7214 | 0.01267 | Uiso | 1 | -0.186 |
| C35 | C | 0.3114  | 0.5694 | 0.7227 | 0.01267 | Uiso | 1 | 0.194  |
| C36 | C | 0.3916  | 0.3521 | 0.4971 | 0.01267 | Uiso | 1 | -0.506 |
| C37 | C | 0.82927 | 0.2782 | 0.497  | 0.01267 | Uiso | 1 | 0.056  |
| C38 | C | 0.03217 | 0.2927 | 0.446  | 0.01267 | Uiso | 1 | 0.066  |
| C39 | C | 0.01537 | 0.0615 | 0.409  | 0.01267 | Uiso | 1 | -0.159 |
| C40 | C | 0.10877 | 0.1114 | 0.5567 | 0.01267 | Uiso | 1 | 0.033  |
| C41 | C | 0.06307 | 0.2067 | 0.4179 | 0.01267 | Uiso | 1 | -0.219 |
| C42 | C | 0.23367 | 0.0561 | 0.5401 | 0.01267 | Uiso | 1 | 0.591  |
| C43 | C | 0.85827 | 0.1884 | 0.467  | 0.01267 | Uiso | 1 | -0.185 |
| C44 | C | 0.97807 | 0.1533 | 0.4306 | 0.01267 | Uiso | 1 | 0.194  |
| C45 | C | 0.05827 | 0.145  | 0.6479 | 0.01267 | Uiso | 1 | -0.506 |
| C46 | C | 0.49593 | 0.2188 | 0.7218 | 0.01267 | Uiso | 1 | 0.056  |
| C47 | C | 0.69883 | 0.1533 | 0.7073 | 0.01267 | Uiso | 1 | 0.066  |
| C48 | C | 0.68203 | 0.3475 | 0.9385 | 0.01267 | Uiso | 1 | -0.159 |
| C49 | C | 0.77543 | 0.4453 | 0.8886 | 0.01267 | Uiso | 1 | 0.033  |
| C50 | C | 0.72973 | 0.2112 | 0.7933 | 0.01267 | Uiso | 1 | -0.218 |
| C51 | C | 0.90033 | 0.484  | 0.9439 | 0.01267 | Uiso | 1 | 0.591  |
| C52 | C | 0.52493 | 0.2786 | 0.8116 | 0.01267 | Uiso | 1 | -0.185 |
| C53 | C | 0.64473 | 0.2773 | 0.8467 | 0.01267 | Uiso | 1 | 0.194  |
| C54 | C | 0.72493 | 0.5029 | 0.855  | 0.01267 | Uiso | 1 | -0.506 |
| N1  | N | 0.844   | 0.4902 | 0.4356 | 0.01267 | Uiso | 1 | -0.514 |
| N2  | N | 0.7481  | 0.485  | 0.1561 | 0.01267 | Uiso | 1 | -0.211 |
| N3  | N | 0.51067 | 0.9454 | 0.5098 | 0.01267 | Uiso | 1 | -0.514 |
| N4  | N | 0.41477 | 0.6711 | 0.515  | 0.01267 | Uiso | 1 | -0.212 |
| N5  | N | 0.17733 | 0.5644 | 0.0546 | 0.01267 | Uiso | 1 | -0.514 |
| N6  | N | 0.08143 | 0.8439 | 0.3289 | 0.01267 | Uiso | 1 | -0.212 |
| N7  | N | 0.344   | 0.5098 | 0.5644 | 0.01267 | Uiso | 1 | -0.514 |
| N8  | N | 0.2481  | 0.515  | 0.8439 | 0.01267 | Uiso | 1 | -0.211 |
| N9  | N | 0.01067 | 0.0546 | 0.4902 | 0.01267 | Uiso | 1 | -0.514 |
| N10 | N | 0.91477 | 0.3289 | 0.485  | 0.01267 | Uiso | 1 | -0.212 |
| N11 | N | 0.67733 | 0.4356 | 0.9454 | 0.01267 | Uiso | 1 | -0.514 |

|     |   |         |        |        |         |      |   |        |
|-----|---|---------|--------|--------|---------|------|---|--------|
| N12 | N | 0.58143 | 0.1561 | 0.6711 | 0.01267 | Uiso | 1 | -0.212 |
| O1  | O | 0.0608  | 0.4969 | 0.5224 | 0.01267 | Uiso | 1 | -0.521 |
| O2  | O | 0.1702  | 0.5765 | 0.4746 | 0.01267 | Uiso | 1 | -0.575 |
| O3  | O | 0.72747 | 0.0255 | 0.5031 | 0.01267 | Uiso | 1 | -0.521 |
| O4  | O | 0.83687 | 0.8981 | 0.4235 | 0.01267 | Uiso | 1 | -0.575 |
| O5  | O | 0.39413 | 0.4776 | 0.9745 | 0.01267 | Uiso | 1 | -0.521 |
| O6  | O | 0.50353 | 0.5254 | 0.1019 | 0.01267 | Uiso | 1 | -0.575 |
| O7  | O | 0.5608  | 0.5031 | 0.4776 | 0.01267 | Uiso | 1 | -0.521 |
| O8  | O | 0.6702  | 0.4235 | 0.5254 | 0.01267 | Uiso | 1 | -0.575 |
| O9  | O | 0.22747 | 0.9745 | 0.4969 | 0.01267 | Uiso | 1 | -0.521 |
| O10 | O | 0.33687 | 0.1019 | 0.5765 | 0.01267 | Uiso | 1 | -0.575 |
| O11 | O | 0.89413 | 0.5224 | 0.0255 | 0.01267 | Uiso | 1 | -0.521 |
| O12 | O | 0.00353 | 0.4746 | 0.8981 | 0.01267 | Uiso | 1 | -0.575 |

```

data_BEPNUH_clean
_audit_creation_date      2014-07-02
_audit_creation_method    'Materials Studio'
_symmetry_space_group_name_H-M  'P1'
_symmetry_Int_Tables_number  1
_symmetry_cell_setting    triclinic
loop_
_symmetry_equiv_pos_as_xyz
  x,y,z
_cell_length_a            10.1716
_cell_length_b            17.7440
_cell_length_c            17.7440
_cell_angle_alpha         120.0000
_cell_angle_beta          90.0000
_cell_angle_gamma         90.0000
loop_
_atom_site_label
_atom_site_type_symbol
_atom_site_fract_x
_atom_site_fract_y
_atom_site_fract_z
_atom_site_U_iso_or_equiv
_atom_site_adp_type
_atom_site_occupancy
_atom_site_charge
Zn1  Zn  0.86811  0.53163  0.4561 0.01267  Uiso  1  0.689
Zn2  Zn  0.53478  0.92447  0.46837  0.01267  Uiso  1  0.689
Zn3  Zn  0.20144  0.5439 0.07553  0.01267  Uiso  1  0.690
Zn4  Zn  0.36811  0.46837  0.5439 0.01267  Uiso  1  0.689
Zn5  Zn  0.03478  0.07553  0.53163  0.01267  Uiso  1  0.689
Zn6  Zn  0.70144  0.4561 0.92447  0.01267  Uiso  1  0.689
H1   H   0.9694 0.4495 0.5223 0.01267  Uiso  1  0.261
H2   H   0.9441 0.3507 0.379 0.01267  Uiso  1  0.131
H3   H   0.7956 0.3437 0.3983 0.01267  Uiso  1  0.115
H4   H   0.7714 0.4044 0.5644 0.01267  Uiso  1  0.080
H5   H   0.8137 0.1105 0.4398 0.01267  Uiso  1  0.098
H6   H   0.092 0.3332 0.4958 0.01267  Uiso  1  0.133
H7   H   0.753 0.2103 0.399 0.01267  Uiso  1  0.141
H8   H   0.1442 0.2301 0.5349 0.01267  Uiso  1  0.105
H9   H   0.9219 0.5056 0.6666 0.01267  Uiso  1  0.158
H10  H   0.7773 0.5353 0.6979 0.01267  Uiso  1  0.178
H11  H   0.858 0.5801 0.6558 0.01267  Uiso  1  0.161
H12  H   0.63607  0.0728 0.5505 0.01267  Uiso  1  0.261
H13  H   0.61077  0.0283 0.6493 0.01267  Uiso  1  0.131
H14  H   0.46227  0.0546 0.6563 0.01267  Uiso  1  0.115
H15  H   0.43807  0.16 0.5956 0.01267  Uiso  1  0.080
H16  H   0.48037  0.3293 0.8895 0.01267  Uiso  1  0.098
H17  H   0.75867  0.1626 0.6668 0.01267  Uiso  1  0.133
H18  H   0.41967  0.1887 0.7897 0.01267  Uiso  1  0.141
H19  H   0.81087  0.3048 0.7699 0.01267  Uiso  1  0.105
H20  H   0.58857  0.161 0.4944 0.01267  Uiso  1  0.158
H21  H   0.44397  0.1626 0.4647 0.01267  Uiso  1  0.178

```

|     |   |         |        |        |         |      |   |        |
|-----|---|---------|--------|--------|---------|------|---|--------|
| H22 | H | 0.52467 | 0.0757 | 0.4199 | 0.01267 | Uiso | 1 | 0.161  |
| H23 | H | 0.30273 | 0.4777 | 0.9272 | 0.01267 | Uiso | 1 | 0.261  |
| H24 | H | 0.27743 | 0.621  | 0.9717 | 0.01267 | Uiso | 1 | 0.131  |
| H25 | H | 0.12893 | 0.6017 | 0.9454 | 0.01267 | Uiso | 1 | 0.115  |
| H26 | H | 0.10473 | 0.4356 | 0.84   | 0.01267 | Uiso | 1 | 0.080  |
| H27 | H | 0.14703 | 0.5602 | 0.6707 | 0.01267 | Uiso | 1 | 0.098  |
| H28 | H | 0.42533 | 0.5042 | 0.8374 | 0.01267 | Uiso | 1 | 0.133  |
| H29 | H | 0.08633 | 0.601  | 0.8113 | 0.01267 | Uiso | 1 | 0.141  |
| H30 | H | 0.47753 | 0.4651 | 0.6952 | 0.01267 | Uiso | 1 | 0.105  |
| H31 | H | 0.25523 | 0.3334 | 0.839  | 0.01267 | Uiso | 1 | 0.158  |
| H32 | H | 0.11063 | 0.3021 | 0.8374 | 0.01267 | Uiso | 1 | 0.178  |
| H33 | H | 0.19133 | 0.3442 | 0.9243 | 0.01267 | Uiso | 1 | 0.161  |
| H34 | H | 0.4694  | 0.5505 | 0.4777 | 0.01267 | Uiso | 1 | 0.261  |
| H35 | H | 0.4441  | 0.6493 | 0.621  | 0.01267 | Uiso | 1 | 0.131  |
| H36 | H | 0.2956  | 0.6563 | 0.6017 | 0.01267 | Uiso | 1 | 0.115  |
| H37 | H | 0.2714  | 0.5956 | 0.4356 | 0.01267 | Uiso | 1 | 0.080  |
| H38 | H | 0.3137  | 0.8895 | 0.5602 | 0.01267 | Uiso | 1 | 0.098  |
| H39 | H | 0.592   | 0.6668 | 0.5042 | 0.01267 | Uiso | 1 | 0.133  |
| H40 | H | 0.253   | 0.7897 | 0.601  | 0.01267 | Uiso | 1 | 0.141  |
| H41 | H | 0.6442  | 0.7699 | 0.4651 | 0.01267 | Uiso | 1 | 0.105  |
| H42 | H | 0.4219  | 0.4944 | 0.3334 | 0.01267 | Uiso | 1 | 0.158  |
| H43 | H | 0.2773  | 0.4647 | 0.3021 | 0.01267 | Uiso | 1 | 0.178  |
| H44 | H | 0.358   | 0.4199 | 0.3442 | 0.01267 | Uiso | 1 | 0.161  |
| H45 | H | 0.13607 | 0.9272 | 0.4495 | 0.01267 | Uiso | 1 | 0.261  |
| H46 | H | 0.11077 | 0.9717 | 0.3507 | 0.01267 | Uiso | 1 | 0.131  |
| H47 | H | 0.96227 | 0.9454 | 0.3437 | 0.01267 | Uiso | 1 | 0.115  |
| H48 | H | 0.93807 | 0.84   | 0.4044 | 0.01267 | Uiso | 1 | 0.081  |
| H49 | H | 0.98037 | 0.6707 | 0.1105 | 0.01267 | Uiso | 1 | 0.098  |
| H50 | H | 0.25867 | 0.8374 | 0.3332 | 0.01267 | Uiso | 1 | 0.133  |
| H51 | H | 0.91967 | 0.8113 | 0.2103 | 0.01267 | Uiso | 1 | 0.141  |
| H52 | H | 0.31087 | 0.6952 | 0.2301 | 0.01267 | Uiso | 1 | 0.105  |
| H53 | H | 0.08857 | 0.839  | 0.5056 | 0.01267 | Uiso | 1 | 0.158  |
| H54 | H | 0.94397 | 0.8374 | 0.5353 | 0.01267 | Uiso | 1 | 0.178  |
| H55 | H | 0.02467 | 0.9243 | 0.5801 | 0.01267 | Uiso | 1 | 0.161  |
| H56 | H | 0.80273 | 0.5223 | 0.0728 | 0.01267 | Uiso | 1 | 0.261  |
| H57 | H | 0.77743 | 0.379  | 0.0283 | 0.01267 | Uiso | 1 | 0.131  |
| H58 | H | 0.62893 | 0.3983 | 0.0546 | 0.01267 | Uiso | 1 | 0.115  |
| H59 | H | 0.60473 | 0.5644 | 0.16   | 0.01267 | Uiso | 1 | 0.080  |
| H60 | H | 0.64703 | 0.4398 | 0.3293 | 0.01267 | Uiso | 1 | 0.098  |
| H61 | H | 0.92533 | 0.4958 | 0.1626 | 0.01267 | Uiso | 1 | 0.133  |
| H62 | H | 0.58633 | 0.399  | 0.1887 | 0.01267 | Uiso | 1 | 0.141  |
| H63 | H | 0.97753 | 0.5349 | 0.3048 | 0.01267 | Uiso | 1 | 0.105  |
| H64 | H | 0.75523 | 0.6666 | 0.161  | 0.01267 | Uiso | 1 | 0.158  |
| H65 | H | 0.61063 | 0.6979 | 0.1626 | 0.01267 | Uiso | 1 | 0.178  |
| H66 | H | 0.69133 | 0.6558 | 0.0757 | 0.01267 | Uiso | 1 | 0.161  |
| C1  | C | 0.9174  | 0.285  | 0.445  | 0.01267 | Uiso | 1 | 0.159  |
| C2  | C | 0.6641  | 0.4923 | 0.5446 | 0.01267 | Uiso | 1 | 0.582  |
| C3  | C | 0.8834  | 0.3545 | 0.423  | 0.01267 | Uiso | 1 | -0.136 |
| C4  | C | 0.7904  | 0.4587 | 0.5648 | 0.01267 | Uiso | 1 | 0.038  |
| C5  | C | 0.8701  | 0.1564 | 0.4519 | 0.01267 | Uiso | 1 | 0.071  |
| C6  | C | 0.0328  | 0.2888 | 0.4843 | 0.01267 | Uiso | 1 | -0.193 |
| C7  | C | 0.8328  | 0.2161 | 0.427  | 0.01267 | Uiso | 1 | -0.203 |

|     |    |         |         |         |         |         |      |        |        |
|-----|----|---------|---------|---------|---------|---------|------|--------|--------|
| C8  | C  | 0.0643  | 0.2264  | 0.5077  | 0.01267 | Uiso    | 1    | 0.101  |        |
| C9  | C  | 0.8417  | 0.5262  | 0.6546  | 0.01267 | Uiso    | 1    | -0.507 |        |
| C10 | C  | 0.58407 |         | 0.16    | 0.715   | 0.01267 | Uiso | 1      | 0.160  |
| C11 | C  | 0.33077 |         | 0.0523  | 0.5077  | 0.01267 | Uiso | 1      | 0.582  |
| C12 | C  | 0.55007 |         | 0.0685  | 0.6455  | 0.01267 | Uiso | 1      | -0.136 |
| C13 | C  | 0.45707 |         | 0.1061  | 0.5413  | 0.01267 | Uiso | 1      | 0.038  |
| C14 | C  | 0.53677 |         | 0.2955  | 0.8436  | 0.01267 | Uiso | 1      | 0.071  |
| C15 | C  | 0.69947 |         | 0.1955  | 0.7112  | 0.01267 | Uiso | 1      | -0.193 |
| C16 | C  | 0.49947 |         | 0.2109  | 0.7839  | 0.01267 | Uiso | 1      | -0.204 |
| C17 | C  | 0.73097 |         | 0.2813  | 0.7736  | 0.01267 | Uiso | 1      | 0.101  |
| C18 | C  | 0.50837 |         | 0.1284  | 0.4738  | 0.01267 | Uiso | 1      | -0.508 |
| C19 | C  | 0.25073 |         | 0.555   | 0.84    | 0.01267 | Uiso | 1      | 0.160  |
| C20 | C  | 0.99743 |         | 0.4554  | 0.9477  | 0.01267 | Uiso | 1      | 0.582  |
| C21 | C  | 0.21673 |         | 0.577   | 0.9315  | 0.01267 | Uiso | 1      | -0.136 |
| C22 | C  | 0.12373 |         | 0.4352  | 0.8939  | 0.01267 | Uiso | 1      | 0.038  |
| C23 | C  | 0.20343 |         | 0.5481  | 0.7045  | 0.01267 | Uiso | 1      | 0.071  |
| C24 | C  | 0.36613 |         | 0.5157  | 0.8045  | 0.01267 | Uiso | 1      | -0.193 |
| C25 | C  | 0.16613 |         | 0.573   | 0.7891  | 0.01267 | Uiso | 1      | -0.203 |
| C26 | C  | 0.39763 |         | 0.4923  | 0.7187  | 0.01267 | Uiso | 1      | 0.101  |
| C27 | C  | 0.17503 |         | 0.3454  | 0.8716  | 0.01267 | Uiso | 1      | -0.508 |
| C28 | C  | 0.4174  | 0.715   | 0.555   | 0.01267 | Uiso    | 1    | 0.160  |        |
| C29 | C  | 0.1641  | 0.5077  | 0.4554  | 0.01267 | Uiso    | 1    | 0.582  |        |
| C30 | C  | 0.3834  | 0.6455  | 0.577   | 0.01267 | Uiso    | 1    | -0.136 |        |
| C31 | C  | 0.2904  | 0.5413  | 0.4352  | 0.01267 | Uiso    | 1    | 0.038  |        |
| C32 | C  | 0.3701  | 0.8436  | 0.5481  | 0.01267 | Uiso    | 1    | 0.071  |        |
| C33 | C  | 0.5328  | 0.7112  | 0.5157  | 0.01267 | Uiso    | 1    | -0.193 |        |
| C34 | C  | 0.3328  | 0.7839  | 0.573   | 0.01267 | Uiso    | 1    | -0.204 |        |
| C35 | C  | 0.5643  | 0.7736  | 0.4923  | 0.01267 | Uiso    | 1    | 0.101  |        |
| C36 | C  | 0.3417  | 0.4738  | 0.3454  | 0.01267 | Uiso    | 1    | -0.508 |        |
| C37 | C  | 0.08407 |         | 0.84    | 0.285   | 0.01267 | Uiso | 1      | 0.159  |
| C38 | C  | 0.83077 |         | 0.9477  | 0.4923  | 0.01267 | Uiso | 1      | 0.582  |
| C39 | C  | 0.05007 |         | 0.9315  | 0.3545  | 0.01267 | Uiso | 1      | -0.136 |
| C40 | C  | 0.95707 |         | 0.8939  | 0.4587  | 0.01267 | Uiso | 1      | 0.038  |
| C41 | C  | 0.03677 |         | 0.7045  | 0.1564  | 0.01267 | Uiso | 1      | 0.071  |
| C42 | C  | 0.19947 |         | 0.8045  | 0.2888  | 0.01267 | Uiso | 1      | -0.193 |
| C43 | C  | 0.99947 |         | 0.7891  | 0.2161  | 0.01267 | Uiso | 1      | -0.204 |
| C44 | C  | 0.23097 |         | 0.7187  | 0.2264  | 0.01267 | Uiso | 1      | 0.101  |
| C45 | C  | 0.00837 |         | 0.8716  | 0.5262  | 0.01267 | Uiso | 1      | -0.508 |
| C46 | C  | 0.75073 |         | 0.445   | 0.16    | 0.01267 | Uiso | 1      | 0.160  |
| C47 | C  | 0.49743 |         | 0.5446  | 0.0523  | 0.01267 | Uiso | 1      | 0.582  |
| C48 | C  | 0.71673 |         | 0.423   | 0.0685  | 0.01267 | Uiso | 1      | -0.136 |
| C49 | C  | 0.62373 |         | 0.5648  | 0.1061  | 0.01267 | Uiso | 1      | 0.039  |
| C50 | C  | 0.70343 |         | 0.4519  | 0.2955  | 0.01267 | Uiso | 1      | 0.071  |
| C51 | C  | 0.86613 |         | 0.4843  | 0.1955  | 0.01267 | Uiso | 1      | -0.193 |
| C52 | C  | 0.66613 |         | 0.427   | 0.2109  | 0.01267 | Uiso | 1      | -0.204 |
| C53 | C  | 0.89763 |         | 0.5077  | 0.2813  | 0.01267 | Uiso | 1      | 0.101  |
| C54 | C  | 0.67503 |         | 0.6546  | 0.1284  | 0.01267 | Uiso | 1      | -0.508 |
| Br1 | Br | 0.89847 |         | 0.68141 | 0.55141 | 0.01267 | Uiso | 1      | -0.540 |
| Br2 | Br | 0.56514 |         | 0.87    | 0.31859 | 0.01267 | Uiso | 1      | -0.540 |
| Br3 | Br | 0.2318  | 0.44859 | 0.13    | 0.01267 | Uiso    | 1    | -0.540 |        |
| Br4 | Br | 0.39847 |         | 0.31859 | 0.44859 | 0.01267 | Uiso | 1      | -0.540 |
| Br5 | Br | 0.06514 |         | 0.13    | 0.68141 | 0.01267 | Uiso | 1      | -0.540 |

|     |    |         |         |         |         |      |   |        |
|-----|----|---------|---------|---------|---------|------|---|--------|
| Br6 | Br | 0.7318  | 0.55141 | 0.87    | 0.01267 | Uiso | 1 | -0.540 |
| N1  | N  | 0.8884  | 0.4419  | 0.4977  | 0.01267 | Uiso | 1 | -0.329 |
| N2  | N  | 0.982   | 0.162   | 0.4919  | 0.01267 | Uiso | 1 | -0.186 |
| N3  | N  | 0.55507 | 0.0558  | 0.5581  | 0.01267 | Uiso | 1 | -0.329 |
| N4  | N  | 0.64867 | 0.3299  | 0.838   | 0.01267 | Uiso | 1 | -0.186 |
| N5  | N  | 0.22173 | 0.5023  | 0.9442  | 0.01267 | Uiso | 1 | -0.329 |
| N6  | N  | 0.31533 | 0.5081  | 0.6701  | 0.01267 | Uiso | 1 | -0.186 |
| N7  | N  | 0.3884  | 0.5581  | 0.5023  | 0.01267 | Uiso | 1 | -0.329 |
| N8  | N  | 0.482   | 0.838   | 0.5081  | 0.01267 | Uiso | 1 | -0.186 |
| N9  | N  | 0.05507 | 0.9442  | 0.4419  | 0.01267 | Uiso | 1 | -0.329 |
| N10 | N  | 0.14867 | 0.6701  | 0.162   | 0.01267 | Uiso | 1 | -0.186 |
| N11 | N  | 0.72173 | 0.4977  | 0.0558  | 0.01267 | Uiso | 1 | -0.329 |
| N12 | N  | 0.81533 | 0.4919  | 0.3299  | 0.01267 | Uiso | 1 | -0.186 |
| O1  | O  | 0.6682  | 0.5169  | 0.48957 | 0.01267 | Uiso | 1 | -0.548 |
| O2  | O  | 0.5643  | 0.4945  | 0.5878  | 0.01267 | Uiso | 1 | -0.560 |
| O3  | O  | 0.33487 | 0.97267 | 0.4831  | 0.01267 | Uiso | 1 | -0.548 |
| O4  | O  | 0.23097 | 0.0933  | 0.5055  | 0.01267 | Uiso | 1 | -0.560 |
| O5  | O  | 0.00153 | 0.51043 | 0.02733 | 0.01267 | Uiso | 1 | -0.548 |
| O6  | O  | 0.89763 | 0.4122  | 0.9067  | 0.01267 | Uiso | 1 | -0.560 |
| O7  | O  | 0.1682  | 0.4831  | 0.51043 | 0.01267 | Uiso | 1 | -0.548 |
| O8  | O  | 0.0643  | 0.5055  | 0.4122  | 0.01267 | Uiso | 1 | -0.560 |
| O9  | O  | 0.83487 | 0.02733 | 0.5169  | 0.01267 | Uiso | 1 | -0.548 |
| O10 | O  | 0.73097 | 0.9067  | 0.4945  | 0.01267 | Uiso | 1 | -0.560 |
| O11 | O  | 0.50153 | 0.48957 | 0.97267 | 0.01267 | Uiso | 1 | -0.548 |
| O12 | O  | 0.39763 | 0.5878  | 0.0933  | 0.01267 | Uiso | 1 | -0.560 |

data\_BEPLUF\_clean

\_audit\_creation\_date 2014-07-02

\_audit\_creation\_method 'Materials Studio'

\_symmetry\_space\_group\_name\_H-M 'P1'

\_symmetry\_Int\_Tables\_number 1

\_symmetry\_cell\_setting triclinic

loop\_

\_symmetry\_equiv\_pos\_as\_xyz

x y z

\_cell\_length\_a 10.1964

\_cell\_length\_b 17.686

\_cell\_length\_c 17.686

\_cell\_angle\_alpha 120

\_cell\_angle\_beta 90

\_cell\_angle\_gamma 90

loop\_

\_atom\_site\_label

\_atom\_site\_type\_symbol

\_atom\_site\_fract\_x

\_atom\_site\_fract\_y

\_atom\_site\_fract\_z

\_atom\_site\_U\_iso\_or\_equiv

\_atom\_site\_adp\_type

\_atom\_site\_occupancy

\_atom\_site\_charge

|     |    |         |         |         |         |      |   |          |
|-----|----|---------|---------|---------|---------|------|---|----------|
| Zn1 | Zn | 0.98621 | 0.45883 | 0.53331 | 0.01267 | Uiso | 1 | 0.291142 |
| Zn2 | Zn | 0.65288 | 0.07448 | 0.54117 | 0.01267 | Uiso | 1 | 0.291451 |
| Zn3 | Zn | 0.31954 | 0.46669 | 0.92552 | 0.01267 | Uiso | 1 | 0.289991 |
| Zn4 | Zn | 0.48621 | 0.54117 | 0.46669 | 0.01267 | Uiso | 1 | 0.291058 |
| Zn5 | Zn | 0.15288 | 0.92552 | 0.45883 | 0.01267 | Uiso | 1 | 0.291719 |
| Zn6 | Zn | 0.81954 | 0.53331 | 0.07448 | 0.01267 | Uiso | 1 | 0.289893 |
| H1  | H  | 0.2046  | 0.328   | 0.436   | 0.01267 | Uiso | 1 | 0.084371 |
| H2  | H  | 0.2586  | 0.1853  | 0.3919  | 0.01267 | Uiso | 1 | 0.127997 |
| H3  | H  | 0.9217  | 0.1627  | 0.4909  | 0.01267 | Uiso | 1 | 0.117034 |
| H4  | H  | 0.8745  | 0.3064  | 0.5324  | 0.01267 | Uiso | 1 | 0.100779 |
| H5  | H  | 0.0717  | 0.0243  | 0.3726  | 0.01267 | Uiso | 1 | 0.124933 |
| H6  | H  | 0.2204  | 0.0511  | 0.3901  | 0.01267 | Uiso | 1 | 0.114522 |
| H7  | H  | 0.2542  | 0.1593  | 0.5496  | 0.01267 | Uiso | 1 | 0.078141 |
| H8  | H  | 0.1191  | 0.1897  | 0.6647  | 0.01267 | Uiso | 1 | 0.163355 |
| H9  | H  | 0.2549  | 0.168   | 0.6909  | 0.01267 | Uiso | 1 | 0.171084 |
| H10 | H  | 0.1429  | 0.0979  | 0.6555  | 0.01267 | Uiso | 1 | 0.151151 |
| H11 | H  | 0.0502  | 0.0744  | 0.5196  | 0.01267 | Uiso | 1 | 0.263415 |
| H12 | H  | 0.87127 | 0.108   | 0.672   | 0.01267 | Uiso | 1 | 0.084733 |
| H13 | H  | 0.92527 | 0.2066  | 0.8147  | 0.01267 | Uiso | 1 | 0.128773 |
| H14 | H  | 0.58837 | 0.3282  | 0.8373  | 0.01267 | Uiso | 1 | 0.117354 |
| H15 | H  | 0.54117 | 0.226   | 0.6936  | 0.01267 | Uiso | 1 | 0.101162 |
| H16 | H  | 0.73837 | 0.3483  | 0.9757  | 0.01267 | Uiso | 1 | 0.125409 |
| H17 | H  | 0.88707 | 0.339   | 0.9489  | 0.01267 | Uiso | 1 | 0.1143   |
| H18 | H  | 0.92087 | 0.3903  | 0.8407  | 0.01267 | Uiso | 1 | 0.077812 |
| H19 | H  | 0.78577 | 0.475   | 0.8103  | 0.01267 | Uiso | 1 | 0.162775 |
| H20 | H  | 0.92157 | 0.5229  | 0.832   | 0.01267 | Uiso | 1 | 0.170612 |
| H21 | H  | 0.80957 | 0.5576  | 0.9021  | 0.01267 | Uiso | 1 | 0.151249 |

|     |   |         |        |        |         |      |   |           |
|-----|---|---------|--------|--------|---------|------|---|-----------|
| H22 | H | 0.71687 | 0.4452 | 0.9256 | 0.01267 | Uiso | 1 | 0.262891  |
| H23 | H | 0.53793 | 0.564  | 0.892  | 0.01267 | Uiso | 1 | 0.083717  |
| H24 | H | 0.59193 | 0.6081 | 0.7934 | 0.01267 | Uiso | 1 | 0.127854  |
| H25 | H | 0.25503 | 0.5091 | 0.6718 | 0.01267 | Uiso | 1 | 0.117289  |
| H26 | H | 0.20783 | 0.4676 | 0.774  | 0.01267 | Uiso | 1 | 0.100286  |
| H27 | H | 0.40503 | 0.6274 | 0.6517 | 0.01267 | Uiso | 1 | 0.125085  |
| H28 | H | 0.55373 | 0.6099 | 0.661  | 0.01267 | Uiso | 1 | 0.113463  |
| H29 | H | 0.58753 | 0.4504 | 0.6097 | 0.01267 | Uiso | 1 | 0.078376  |
| H30 | H | 0.45243 | 0.3353 | 0.525  | 0.01267 | Uiso | 1 | 0.162457  |
| H31 | H | 0.58823 | 0.3091 | 0.4771 | 0.01267 | Uiso | 1 | 0.170678  |
| H32 | H | 0.47623 | 0.3445 | 0.4424 | 0.01267 | Uiso | 1 | 0.150499  |
| H33 | H | 0.38353 | 0.4804 | 0.5548 | 0.01267 | Uiso | 1 | 0.263034  |
| H34 | H | 0.7046  | 0.672  | 0.564  | 0.01267 | Uiso | 1 | 0.084372  |
| H35 | H | 0.7586  | 0.8147 | 0.6081 | 0.01267 | Uiso | 1 | 0.127927  |
| H36 | H | 0.4217  | 0.8373 | 0.5091 | 0.01267 | Uiso | 1 | 0.11703   |
| H37 | H | 0.3745  | 0.6936 | 0.4676 | 0.01267 | Uiso | 1 | 0.100728  |
| H38 | H | 0.5717  | 0.9757 | 0.6274 | 0.01267 | Uiso | 1 | 0.125003  |
| H39 | H | 0.7204  | 0.9489 | 0.6099 | 0.01267 | Uiso | 1 | 0.114442  |
| H40 | H | 0.7542  | 0.8407 | 0.4504 | 0.01267 | Uiso | 1 | 0.078121  |
| H41 | H | 0.6191  | 0.8103 | 0.3353 | 0.01267 | Uiso | 1 | 0.163409  |
| H42 | H | 0.7549  | 0.832  | 0.3091 | 0.01267 | Uiso | 1 | 0.171037  |
| H43 | H | 0.6429  | 0.9021 | 0.3445 | 0.01267 | Uiso | 1 | 0.151159  |
| H44 | H | 0.5502  | 0.9256 | 0.4804 | 0.01267 | Uiso | 1 | 0.263499  |
| H45 | H | 0.37127 | 0.892  | 0.328  | 0.01267 | Uiso | 1 | 0.084839  |
| H46 | H | 0.42527 | 0.7934 | 0.1853 | 0.01267 | Uiso | 1 | 0.12883   |
| H47 | H | 0.08837 | 0.6718 | 0.1627 | 0.01267 | Uiso | 1 | 0.117212  |
| H48 | H | 0.04117 | 0.774  | 0.3064 | 0.01267 | Uiso | 1 | 0.101072  |
| H49 | H | 0.23837 | 0.6517 | 0.0243 | 0.01267 | Uiso | 1 | 0.12532   |
| H50 | H | 0.38707 | 0.661  | 0.0511 | 0.01267 | Uiso | 1 | 0.114304  |
| H51 | H | 0.42087 | 0.6097 | 0.1593 | 0.01267 | Uiso | 1 | 0.077962  |
| H52 | H | 0.28577 | 0.525  | 0.1897 | 0.01267 | Uiso | 1 | 0.162787  |
| H53 | H | 0.42157 | 0.4771 | 0.168  | 0.01267 | Uiso | 1 | 0.170647  |
| H54 | H | 0.30957 | 0.4424 | 0.0979 | 0.01267 | Uiso | 1 | 0.151136  |
| H55 | H | 0.21687 | 0.5548 | 0.0744 | 0.01267 | Uiso | 1 | 0.262865  |
| H56 | H | 0.03793 | 0.436  | 0.108  | 0.01267 | Uiso | 1 | 0.083709  |
| H57 | H | 0.09193 | 0.3919 | 0.2066 | 0.01267 | Uiso | 1 | 0.127906  |
| H58 | H | 0.75503 | 0.4909 | 0.3282 | 0.01267 | Uiso | 1 | 0.117435  |
| H59 | H | 0.70783 | 0.5324 | 0.226  | 0.01267 | Uiso | 1 | 0.10044   |
| H60 | H | 0.90503 | 0.3726 | 0.3483 | 0.01267 | Uiso | 1 | 0.125082  |
| H61 | H | 0.05373 | 0.3901 | 0.339  | 0.01267 | Uiso | 1 | 0.113367  |
| H62 | H | 0.08753 | 0.5496 | 0.3903 | 0.01267 | Uiso | 1 | 0.078335  |
| H63 | H | 0.95243 | 0.6647 | 0.475  | 0.01267 | Uiso | 1 | 0.162403  |
| H64 | H | 0.08823 | 0.6909 | 0.5229 | 0.01267 | Uiso | 1 | 0.17081   |
| H65 | H | 0.97623 | 0.6555 | 0.5576 | 0.01267 | Uiso | 1 | 0.15053   |
| H66 | H | 0.88353 | 0.5196 | 0.4452 | 0.01267 | Uiso | 1 | 0.26306   |
| C1  | C | 0.1467  | 0.295  | 0.4484 | 0.01267 | Uiso | 1 | 0.051883  |
| C2  | C | 0.1806  | 0.2088 | 0.4218 | 0.01267 | Uiso | 1 | -0.228864 |
| C3  | C | 0.0969  | 0.1587 | 0.4404 | 0.01267 | Uiso | 1 | 0.116879  |
| C4  | C | 0.9823  | 0.1954 | 0.48   | 0.01267 | Uiso | 1 | -0.211308 |
| C5  | C | 0.9537  | 0.2822 | 0.5048 | 0.01267 | Uiso | 1 | 0.051252  |
| C6  | C | 0.1333  | 0.0649 | 0.4157 | 0.01267 | Uiso | 1 | -0.12664  |
| C7  | C | 0.2324  | 0.1099 | 0.5577 | 0.01267 | Uiso | 1 | 0.035541  |

|     |   |         |        |        |         |         |      |           |           |
|-----|---|---------|--------|--------|---------|---------|------|-----------|-----------|
| C8  | C | 0.3566  | 0.0549 | 0.5436 | 0.01267 | Uiso    | 1    | 0.562543  |           |
| C9  | C | 0.1827  | 0.1446 | 0.6508 | 0.01267 | Uiso    | 1    | -0.512567 |           |
| C10 | C | 0.81337 |        | 0.1534 | 0.705   | 0.01267 | Uiso | 1         | 0.052741  |
| C11 | C | 0.84727 |        | 0.213  | 0.7912  | 0.01267 | Uiso | 1         | -0.228577 |
| C12 | C | 0.76357 |        | 0.2817 | 0.8413  | 0.01267 | Uiso | 1         | 0.118269  |
| C13 | C | 0.64897 |        | 0.2846 | 0.8046  | 0.01267 | Uiso | 1         | -0.210769 |
| C14 | C | 0.62037 |        | 0.2226 | 0.7178  | 0.01267 | Uiso | 1         | 0.052462  |
| C15 | C | 0.79997 |        | 0.3508 | 0.9351  | 0.01267 | Uiso | 1         | -0.126393 |
| C16 | C | 0.89907 |        | 0.4478 | 0.8901  | 0.01267 | Uiso | 1         | 0.03574   |
| C17 | C | 0.02327 |        | 0.4887 | 0.9451  | 0.01267 | Uiso | 1         | 0.562945  |
| C18 | C | 0.84937 |        | 0.5062 | 0.8554  | 0.01267 | Uiso | 1         | -0.511311 |
| C19 | C | 0.48003 |        | 0.5516 | 0.8466  | 0.01267 | Uiso | 1         | 0.053559  |
| C20 | C | 0.51393 |        | 0.5782 | 0.787   | 0.01267 | Uiso | 1         | -0.229668 |
| C21 | C | 0.43023 |        | 0.5596 | 0.7183  | 0.01267 | Uiso | 1         | 0.118214  |
| C22 | C | 0.31563 |        | 0.52   | 0.7154  | 0.01267 | Uiso | 1         | -0.211251 |
| C23 | C | 0.28703 |        | 0.4952 | 0.7774  | 0.01267 | Uiso | 1         | 0.051472  |
| C24 | C | 0.46663 |        | 0.5843 | 0.6492  | 0.01267 | Uiso | 1         | -0.12585  |
| C25 | C | 0.56573 |        | 0.4423 | 0.5522  | 0.01267 | Uiso | 1         | 0.033964  |
| C26 | C | 0.68993 |        | 0.4564 | 0.5113  | 0.01267 | Uiso | 1         | 0.562625  |
| C27 | C | 0.51603 |        | 0.3492 | 0.4938  | 0.01267 | Uiso | 1         | -0.51003  |
| C28 | C | 0.6467  | 0.705  | 0.5516 | 0.01267 | Uiso    | 1    | 0.051752  |           |
| C29 | C | 0.6806  | 0.7912 | 0.5782 | 0.01267 | Uiso    | 1    | -0.228813 |           |
| C30 | C | 0.5969  | 0.8413 | 0.5596 | 0.01267 | Uiso    | 1    | 0.116916  |           |
| C31 | C | 0.4823  | 0.8046 | 0.52   | 0.01267 | Uiso    | 1    | -0.211347 |           |
| C32 | C | 0.4537  | 0.7178 | 0.4952 | 0.01267 | Uiso    | 1    | 0.051226  |           |
| C33 | C | 0.6333  | 0.9351 | 0.5843 | 0.01267 | Uiso    | 1    | -0.126598 |           |
| C34 | C | 0.7324  | 0.8901 | 0.4423 | 0.01267 | Uiso    | 1    | 0.035564  |           |
| C35 | C | 0.8566  | 0.9451 | 0.4564 | 0.01267 | Uiso    | 1    | 0.562513  |           |
| C36 | C | 0.6827  | 0.8554 | 0.3492 | 0.01267 | Uiso    | 1    | -0.512647 |           |
| C37 | C | 0.31337 |        | 0.8466 | 0.295   | 0.01267 | Uiso | 1         | 0.052654  |
| C38 | C | 0.34727 |        | 0.787  | 0.2088  | 0.01267 | Uiso | 1         | -0.228625 |
| C39 | C | 0.26357 |        | 0.7183 | 0.1587  | 0.01267 | Uiso | 1         | 0.11807   |
| C40 | C | 0.14897 |        | 0.7154 | 0.1954  | 0.01267 | Uiso | 1         | -0.21066  |
| C41 | C | 0.12037 |        | 0.7774 | 0.2822  | 0.01267 | Uiso | 1         | 0.052422  |
| C42 | C | 0.29997 |        | 0.6492 | 0.0649  | 0.01267 | Uiso | 1         | -0.126309 |
| C43 | C | 0.39907 |        | 0.5522 | 0.1099  | 0.01267 | Uiso | 1         | 0.0356    |
| C44 | C | 0.52327 |        | 0.5113 | 0.0549  | 0.01267 | Uiso | 1         | 0.563121  |
| C45 | C | 0.34937 |        | 0.4938 | 0.1446  | 0.01267 | Uiso | 1         | -0.511233 |
| C46 | C | 0.98003 |        | 0.4484 | 0.1534  | 0.01267 | Uiso | 1         | 0.053411  |
| C47 | C | 0.01393 |        | 0.4218 | 0.213   | 0.01267 | Uiso | 1         | -0.229742 |
| C48 | C | 0.93023 |        | 0.4404 | 0.2817  | 0.01267 | Uiso | 1         | 0.118211  |
| C49 | C | 0.81563 |        | 0.48   | 0.2846  | 0.01267 | Uiso | 1         | -0.211423 |
| C50 | C | 0.78703 |        | 0.5048 | 0.2226  | 0.01267 | Uiso | 1         | 0.051483  |
| C51 | C | 0.96663 |        | 0.4157 | 0.3508  | 0.01267 | Uiso | 1         | -0.125834 |
| C52 | C | 0.06573 |        | 0.5577 | 0.4478  | 0.01267 | Uiso | 1         | 0.033957  |
| C53 | C | 0.18993 |        | 0.5436 | 0.4887  | 0.01267 | Uiso | 1         | 0.562558  |
| C54 | C | 0.01603 |        | 0.6508 | 0.5062  | 0.01267 | Uiso | 1         | -0.510127 |
| N1  | N | 0.13    | 0.056  | 0.4938 | 0.01267 | Uiso    | 1    | -0.292102 |           |
| N2  | N | 0.0393  | 0.3315 | 0.4893 | 0.01267 | Uiso    | 1    | -0.173982 |           |
| N3  | N | 0.79667 |        | 0.4378 | 0.944   | 0.01267 | Uiso | 1         | -0.291531 |
| N4  | N | 0.70597 |        | 0.1578 | 0.6685  | 0.01267 | Uiso | 1         | -0.174247 |
| N5  | N | 0.46333 |        | 0.5062 | 0.5622  | 0.01267 | Uiso | 1         | -0.290467 |

|     |   |         |        |        |         |      |   |           |
|-----|---|---------|--------|--------|---------|------|---|-----------|
| N6  | N | 0.37263 | 0.5107 | 0.8422 | 0.01267 | Uiso | 1 | -0.174334 |
| N7  | N | 0.63    | 0.944  | 0.5062 | 0.01267 | Uiso | 1 | -0.292054 |
| N8  | N | 0.5393  | 0.6685 | 0.5107 | 0.01267 | Uiso | 1 | -0.173901 |
| N9  | N | 0.29667 | 0.5622 | 0.056  | 0.01267 | Uiso | 1 | -0.291486 |
| N10 | N | 0.20597 | 0.8422 | 0.3315 | 0.01267 | Uiso | 1 | -0.174264 |
| N11 | N | 0.96333 | 0.4938 | 0.4378 | 0.01267 | Uiso | 1 | -0.290465 |
| N12 | N | 0.87263 | 0.4893 | 0.1578 | 0.01267 | Uiso | 1 | -0.174309 |
| O1  | O | 0.3501  | 0.9737 | 0.4971 | 0.01267 | Uiso | 1 | -0.525113 |
| O2  | O | 0.456   | 0.0983 | 0.5799 | 0.01267 | Uiso | 1 | -0.537905 |
| O3  | O | 0.01677 | 0.5234 | 0.0263 | 0.01267 | Uiso | 1 | -0.524994 |
| O4  | O | 0.12267 | 0.4816 | 0.9017 | 0.01267 | Uiso | 1 | -0.538297 |
| O5  | O | 0.68343 | 0.5029 | 0.4766 | 0.01267 | Uiso | 1 | -0.524894 |
| O6  | O | 0.78933 | 0.4201 | 0.5184 | 0.01267 | Uiso | 1 | -0.538008 |
| O7  | O | 0.8501  | 0.0263 | 0.5029 | 0.01267 | Uiso | 1 | -0.524987 |
| O8  | O | 0.956   | 0.9017 | 0.4201 | 0.01267 | Uiso | 1 | -0.537976 |
| O9  | O | 0.51677 | 0.4766 | 0.9737 | 0.01267 | Uiso | 1 | -0.525136 |
| O10 | O | 0.62267 | 0.5184 | 0.0983 | 0.01267 | Uiso | 1 | -0.538301 |
| O11 | O | 0.18343 | 0.4971 | 0.5234 | 0.01267 | Uiso | 1 | -0.524913 |
| O12 | O | 0.28933 | 0.5799 | 0.4816 | 0.01267 | Uiso | 1 | -0.537917 |

```

data_BEPNIV_clean
_audit_creation_date      2014-07-02
_audit_creation_method    'Materials Studio'
_symmetry_space_group_name_H-M  'P1'
_symmetry_Int_Tables_number  1
_symmetry_cell_setting    triclinic
loop_
_symmetry_equiv_pos_as_xyz
  x,y,z
_cell_length_a            10.1486
_cell_length_b            17.5806
_cell_length_c            17.5806
_cell_angle_alpha        120.0000
_cell_angle_beta         90.0000
_cell_angle_gamma        90.0000
loop_
_atom_site_label
_atom_site_type_symbol
_atom_site_fract_x
_atom_site_fract_y
_atom_site_fract_z
_atom_site_U_iso_or_equiv
_atom_site_adp_type
_atom_site_occupancy
_atom_site_charge
Zn1  Zn   0.96018 0.46685 0.92633 0.01267 Uiso  1   0.753288
Zn2  Zn   0.62685 0.45948 0.53315 0.01267 Uiso  1   0.753225
Zn3  Zn   0.29351 0.07367 0.54052 0.01267 Uiso  1   0.753442
Zn4  Zn   0.46018 0.53315 0.07367 0.01267 Uiso  1   0.753336
Zn5  Zn   0.12685 0.54052 0.46685 0.01267 Uiso  1   0.753107
Zn6  Zn   0.79351 0.92633 0.45948 0.01267 Uiso  1   0.753388
H1   H    0.0167 0.8919 0.3265 0.01267 Uiso  1   0.099354
H2   H    0.673 0.78 0.3045 0.01267 Uiso  1   0.104161
H3   H    0.0667 0.7966 0.1862 0.01267 Uiso  1   0.131051
H4   H    0.7228 0.6758 0.1607 0.01267 Uiso  1   0.135261
H5   H    0.952 0.5374 0.2061 0.01267 Uiso  1   0.159453
H6   H    0.0606 0.4682 0.1508 0.01267 Uiso  1   0.147709
H7   H    0.9209 0.4623 0.1102 0.01267 Uiso  1   0.155729
H8   H    0.8709 0.6555 0.021 0.01267 Uiso  1   0.120185
H9   H    0.0211 0.6669 0.0463 0.01267 Uiso  1   0.081754
H10  H    0.0547 0.6197 0.1611 0.01267 Uiso  1   0.073148
H11  H    0.68337 0.4346 0.1081 0.01267 Uiso  1   0.099148
H12  H    0.33967 0.5245 0.22 0.01267 Uiso  1   0.104265
H13  H    0.73337 0.3896 0.2034 0.01267 Uiso  1   0.130927
H14  H    0.38947 0.4849 0.3242 0.01267 Uiso  1   0.135226
H15  H    0.61867 0.6687 0.4626 0.01267 Uiso  1   0.159265
H16  H    0.72727 0.6826 0.5318 0.01267 Uiso  1   0.147822
H17  H    0.58757 0.6479 0.5377 0.01267 Uiso  1   0.155674
H18  H    0.53757 0.3655 0.3445 0.01267 Uiso  1   0.12022
H19  H    0.68777 0.3794 0.3331 0.01267 Uiso  1   0.081855
H20  H    0.72137 0.5414 0.3803 0.01267 Uiso  1   0.07285
H21  H    0.35003 0.6735 0.5654 0.01267 Uiso  1   0.099027

```

|     |   |         |        |        |         |      |   |           |
|-----|---|---------|--------|--------|---------|------|---|-----------|
| H22 | H | 0.00633 | 0.6955 | 0.4755 | 0.01267 | Uiso | 1 | 0.104197  |
| H23 | H | 0.40003 | 0.8138 | 0.6104 | 0.01267 | Uiso | 1 | 0.131107  |
| H24 | H | 0.05613 | 0.8393 | 0.5151 | 0.01267 | Uiso | 1 | 0.135219  |
| H25 | H | 0.28533 | 0.7939 | 0.3313 | 0.01267 | Uiso | 1 | 0.159279  |
| H26 | H | 0.39393 | 0.8492 | 0.3174 | 0.01267 | Uiso | 1 | 0.147813  |
| H27 | H | 0.25423 | 0.8898 | 0.3521 | 0.01267 | Uiso | 1 | 0.155685  |
| H28 | H | 0.20423 | 0.979  | 0.6345 | 0.01267 | Uiso | 1 | 0.120326  |
| H29 | H | 0.35443 | 0.9537 | 0.6206 | 0.01267 | Uiso | 1 | 0.081861  |
| H30 | H | 0.38803 | 0.8389 | 0.4586 | 0.01267 | Uiso | 1 | 0.072686  |
| H31 | H | 0.5167  | 0.1081 | 0.6735 | 0.01267 | Uiso | 1 | 0.099248  |
| H32 | H | 0.173   | 0.22   | 0.6955 | 0.01267 | Uiso | 1 | 0.104176  |
| H33 | H | 0.5667  | 0.2034 | 0.8138 | 0.01267 | Uiso | 1 | 0.131038  |
| H34 | H | 0.2228  | 0.3242 | 0.8393 | 0.01267 | Uiso | 1 | 0.135336  |
| H35 | H | 0.452   | 0.4626 | 0.7939 | 0.01267 | Uiso | 1 | 0.159329  |
| H36 | H | 0.5606  | 0.5318 | 0.8492 | 0.01267 | Uiso | 1 | 0.147736  |
| H37 | H | 0.4209  | 0.5377 | 0.8898 | 0.01267 | Uiso | 1 | 0.155765  |
| H38 | H | 0.3709  | 0.3445 | 0.979  | 0.01267 | Uiso | 1 | 0.120235  |
| H39 | H | 0.5211  | 0.3331 | 0.9537 | 0.01267 | Uiso | 1 | 0.081779  |
| H40 | H | 0.5547  | 0.3803 | 0.8389 | 0.01267 | Uiso | 1 | 0.072901  |
| H41 | H | 0.18337 | 0.5654 | 0.8919 | 0.01267 | Uiso | 1 | 0.099249  |
| H42 | H | 0.83967 | 0.4755 | 0.78   | 0.01267 | Uiso | 1 | 0.104272  |
| H43 | H | 0.23337 | 0.6104 | 0.7966 | 0.01267 | Uiso | 1 | 0.131054  |
| H44 | H | 0.88947 | 0.5151 | 0.6758 | 0.01267 | Uiso | 1 | 0.135193  |
| H45 | H | 0.11867 | 0.3313 | 0.5374 | 0.01267 | Uiso | 1 | 0.159326  |
| H46 | H | 0.22727 | 0.3174 | 0.4682 | 0.01267 | Uiso | 1 | 0.147808  |
| H47 | H | 0.08757 | 0.3521 | 0.4623 | 0.01267 | Uiso | 1 | 0.155664  |
| H48 | H | 0.03757 | 0.6345 | 0.6555 | 0.01267 | Uiso | 1 | 0.12021   |
| H49 | H | 0.18777 | 0.6206 | 0.6669 | 0.01267 | Uiso | 1 | 0.081868  |
| H50 | H | 0.22137 | 0.4586 | 0.6197 | 0.01267 | Uiso | 1 | 0.072961  |
| H51 | H | 0.85003 | 0.3265 | 0.4346 | 0.01267 | Uiso | 1 | 0.099047  |
| H52 | H | 0.50633 | 0.3045 | 0.5245 | 0.01267 | Uiso | 1 | 0.104272  |
| H53 | H | 0.90003 | 0.1862 | 0.3896 | 0.01267 | Uiso | 1 | 0.131035  |
| H54 | H | 0.55613 | 0.1607 | 0.4849 | 0.01267 | Uiso | 1 | 0.135201  |
| H55 | H | 0.78533 | 0.2061 | 0.6687 | 0.01267 | Uiso | 1 | 0.159348  |
| H56 | H | 0.89393 | 0.1508 | 0.6826 | 0.01267 | Uiso | 1 | 0.147819  |
| H57 | H | 0.75423 | 0.1102 | 0.6479 | 0.01267 | Uiso | 1 | 0.155646  |
| H58 | H | 0.70423 | 0.021  | 0.3655 | 0.01267 | Uiso | 1 | 0.120288  |
| H59 | H | 0.85443 | 0.0463 | 0.3794 | 0.01267 | Uiso | 1 | 0.081868  |
| H60 | H | 0.88803 | 0.1611 | 0.5414 | 0.01267 | Uiso | 1 | 0.072813  |
| C1  | C | 0.9563  | 0.8481 | 0.2928 | 0.01267 | Uiso | 1 | 0.072855  |
| C2  | C | 0.754   | 0.7825 | 0.2812 | 0.01267 | Uiso | 1 | 0.060545  |
| C3  | C | 0.9865  | 0.7913 | 0.2087 | 0.01267 | Uiso | 1 | -0.220333 |
| C4  | C | 0.9003  | 0.7249 | 0.1548 | 0.01267 | Uiso | 1 | 0.194288  |
| C5  | C | 0.7828  | 0.7204 | 0.1934 | 0.01267 | Uiso | 1 | -0.192184 |
| C6  | C | 0.9877  | 0.5016 | 0.1482 | 0.01267 | Uiso | 1 | -0.513702 |
| C7  | C | 0.1598  | 0.5209 | 0.0586 | 0.01267 | Uiso | 1 | 0.593109  |
| C8  | C | 0.9349  | 0.655  | 0.0618 | 0.01267 | Uiso | 1 | -0.162404 |
| C9  | C | 0.0353  | 0.5609 | 0.1122 | 0.01267 | Uiso | 1 | 0.026856  |
| C10 | C | 0.62297 | 0.4447 | 0.1519 | 0.01267 | Uiso | 1 | 0.072989  |
| C11 | C | 0.42067 | 0.4987 | 0.2175 | 0.01267 | Uiso | 1 | 0.06044   |
| C12 | C | 0.65317 | 0.4174 | 0.2087 | 0.01267 | Uiso | 1 | -0.220123 |
| C13 | C | 0.56697 | 0.4299 | 0.2751 | 0.01267 | Uiso | 1 | 0.194235  |

|     |   |         |        |        |         |      |   |           |
|-----|---|---------|--------|--------|---------|------|---|-----------|
| C14 | C | 0.44947 | 0.473  | 0.2796 | 0.01267 | Uiso | 1 | -0.191935 |
| C15 | C | 0.65437 | 0.6466 | 0.4984 | 0.01267 | Uiso | 1 | -0.513259 |
| C16 | C | 0.82647 | 0.5377 | 0.4791 | 0.01267 | Uiso | 1 | 0.593132  |
| C17 | C | 0.60157 | 0.4068 | 0.345  | 0.01267 | Uiso | 1 | -0.16268  |
| C18 | C | 0.70197 | 0.5513 | 0.4391 | 0.01267 | Uiso | 1 | 0.026852  |
| C19 | C | 0.28963 | 0.7072 | 0.5553 | 0.01267 | Uiso | 1 | 0.072945  |
| C20 | C | 0.08733 | 0.7188 | 0.5013 | 0.01267 | Uiso | 1 | 0.060402  |
| C21 | C | 0.31983 | 0.7913 | 0.5826 | 0.01267 | Uiso | 1 | -0.220307 |
| C22 | C | 0.23363 | 0.8452 | 0.5701 | 0.01267 | Uiso | 1 | 0.194384  |
| C23 | C | 0.11613 | 0.8066 | 0.527  | 0.01267 | Uiso | 1 | -0.192064 |
| C24 | C | 0.32103 | 0.8518 | 0.3534 | 0.01267 | Uiso | 1 | -0.513519 |
| C25 | C | 0.49313 | 0.9414 | 0.4623 | 0.01267 | Uiso | 1 | 0.59306   |
| C26 | C | 0.26823 | 0.9382 | 0.5932 | 0.01267 | Uiso | 1 | -0.162559 |
| C27 | C | 0.36863 | 0.8878 | 0.4487 | 0.01267 | Uiso | 1 | 0.027174  |
| C28 | C | 0.4563  | 0.1519 | 0.7072 | 0.01267 | Uiso | 1 | 0.072827  |
| C29 | C | 0.254   | 0.2175 | 0.7188 | 0.01267 | Uiso | 1 | 0.060492  |
| C30 | C | 0.4865  | 0.2087 | 0.7913 | 0.01267 | Uiso | 1 | -0.220265 |
| C31 | C | 0.4003  | 0.2751 | 0.8452 | 0.01267 | Uiso | 1 | 0.194326  |
| C32 | C | 0.2828  | 0.2796 | 0.8066 | 0.01267 | Uiso | 1 | -0.192113 |
| C33 | C | 0.4877  | 0.4984 | 0.8518 | 0.01267 | Uiso | 1 | -0.513674 |
| C34 | C | 0.6598  | 0.4791 | 0.9414 | 0.01267 | Uiso | 1 | 0.592895  |
| C35 | C | 0.4349  | 0.345  | 0.9382 | 0.01267 | Uiso | 1 | -0.162515 |
| C36 | C | 0.5353  | 0.4391 | 0.8878 | 0.01267 | Uiso | 1 | 0.027083  |
| C37 | C | 0.12297 | 0.5553 | 0.8481 | 0.01267 | Uiso | 1 | 0.073099  |
| C38 | C | 0.92067 | 0.5013 | 0.7825 | 0.01267 | Uiso | 1 | 0.06041   |
| C39 | C | 0.15317 | 0.5826 | 0.7913 | 0.01267 | Uiso | 1 | -0.220231 |
| C40 | C | 0.06697 | 0.5701 | 0.7249 | 0.01267 | Uiso | 1 | 0.194161  |
| C41 | C | 0.94947 | 0.527  | 0.7204 | 0.01267 | Uiso | 1 | -0.191953 |
| C42 | C | 0.15437 | 0.3534 | 0.5016 | 0.01267 | Uiso | 1 | -0.513519 |
| C43 | C | 0.32647 | 0.4623 | 0.5209 | 0.01267 | Uiso | 1 | 0.593255  |
| C44 | C | 0.10157 | 0.5932 | 0.655  | 0.01267 | Uiso | 1 | -0.162354 |
| C45 | C | 0.20197 | 0.4487 | 0.5609 | 0.01267 | Uiso | 1 | 0.02682   |
| C46 | C | 0.78963 | 0.2928 | 0.4447 | 0.01267 | Uiso | 1 | 0.072952  |
| C47 | C | 0.58733 | 0.2812 | 0.4987 | 0.01267 | Uiso | 1 | 0.060415  |
| C48 | C | 0.81983 | 0.2087 | 0.4174 | 0.01267 | Uiso | 1 | -0.220294 |
| C49 | C | 0.73363 | 0.1548 | 0.4299 | 0.01267 | Uiso | 1 | 0.19431   |
| C50 | C | 0.61613 | 0.1934 | 0.473  | 0.01267 | Uiso | 1 | -0.192036 |
| C51 | C | 0.82103 | 0.1482 | 0.6466 | 0.01267 | Uiso | 1 | -0.513399 |
| C52 | C | 0.99313 | 0.0586 | 0.5377 | 0.01267 | Uiso | 1 | 0.593082  |
| C53 | C | 0.76823 | 0.0618 | 0.4068 | 0.01267 | Uiso | 1 | -0.16276  |
| C54 | C | 0.86863 | 0.1122 | 0.5513 | 0.01267 | Uiso | 1 | 0.027148  |
| N1  | N | 0.935   | 0.5668 | 0.0558 | 0.01267 | Uiso | 1 | -0.507781 |
| N2  | N | 0.84    | 0.8448 | 0.3319 | 0.01267 | Uiso | 1 | -0.216843 |
| N3  | N | 0.60167 | 0.489  | 0.4332 | 0.01267 | Uiso | 1 | -0.50758  |
| N4  | N | 0.50667 | 0.4871 | 0.1552 | 0.01267 | Uiso | 1 | -0.216877 |
| N5  | N | 0.26833 | 0.9442 | 0.511  | 0.01267 | Uiso | 1 | -0.507679 |
| N6  | N | 0.17333 | 0.6681 | 0.5129 | 0.01267 | Uiso | 1 | -0.216829 |
| N7  | N | 0.435   | 0.4332 | 0.9442 | 0.01267 | Uiso | 1 | -0.507742 |
| N8  | N | 0.34    | 0.1552 | 0.6681 | 0.01267 | Uiso | 1 | -0.217014 |
| N9  | N | 0.10167 | 0.511  | 0.5668 | 0.01267 | Uiso | 1 | -0.507828 |
| N10 | N | 0.00667 | 0.5129 | 0.8448 | 0.01267 | Uiso | 1 | -0.216896 |
| N11 | N | 0.76833 | 0.0558 | 0.489  | 0.01267 | Uiso | 1 | -0.507611 |

|     |   |         |        |        |         |      |   |           |
|-----|---|---------|--------|--------|---------|------|---|-----------|
| N12 | N | 0.67333 | 0.3319 | 0.4871 | 0.01267 | Uiso | 1 | -0.21672  |
| O1  | O | 0.1546  | 0.4799 | 0.9767 | 0.01267 | Uiso | 1 | -0.520331 |
| O2  | O | 0.2636  | 0.5318 | 0.1043 | 0.01267 | Uiso | 1 | -0.575343 |
| O3  | O | 0.82127 | 0.4968 | 0.5201 | 0.01267 | Uiso | 1 | -0.520096 |
| O4  | O | 0.93027 | 0.5725 | 0.4682 | 0.01267 | Uiso | 1 | -0.575373 |
| O5  | O | 0.48793 | 0.0233 | 0.5032 | 0.01267 | Uiso | 1 | -0.520109 |
| O6  | O | 0.59693 | 0.8957 | 0.4275 | 0.01267 | Uiso | 1 | -0.575553 |
| O7  | O | 0.6546  | 0.5201 | 0.0233 | 0.01267 | Uiso | 1 | -0.520046 |
| O8  | O | 0.7636  | 0.4682 | 0.8957 | 0.01267 | Uiso | 1 | -0.575344 |
| O9  | O | 0.32127 | 0.5032 | 0.4799 | 0.01267 | Uiso | 1 | -0.520103 |
| O10 | O | 0.43027 | 0.4275 | 0.5318 | 0.01267 | Uiso | 1 | -0.575434 |
| O11 | O | 0.98793 | 0.9767 | 0.4968 | 0.01267 | Uiso | 1 | -0.520303 |
| O12 | O | 0.09693 | 0.1043 | 0.5725 | 0.01267 | Uiso | 1 | -0.575453 |

```

_FIQCEN_clean
_audit_creation_date      2014-07-02
_audit_creation_method    'Materials Studio'
_symmetry_space_group_name_H-M  'P1'
_symmetry_Int_Tables_number  1
_symmetry_cell_setting    triclinic
loop_
_symmetry_equiv_pos_as_xyz
  x,y,z
_cell_length_a            18.6273
_cell_length_b            18.6273
_cell_length_c            18.6273
_cell_angle_alpha        60.0000
_cell_angle_beta         60.0000
_cell_angle_gamma        60.0000
loop_
_atom_site_label
_atom_site_type_symbol
_atom_site_fract_x
_atom_site_fract_y
_atom_site_fract_z
_atom_site_U_iso_or_equiv
_atom_site_adp_type
_atom_site_occupancy
_atom_site_charge
Cu1  Cu  0.57057 0  0.42943 0.01267 Uiso  1  0.857982
Cu2  Cu  0  0.57057 0  0.01267 Uiso  1  0.857599
Cu3  Cu  0.42943 0  0.57057 0.01267 Uiso  1  0.857902
Cu4  Cu  0  0.42943 0  0.01267 Uiso  1  0.85725
Cu5  Cu  0.57057 0.42943 0  0.01267 Uiso  1  0.858038
Cu6  Cu  0  1  0.42943 0.01267 Uiso  1  0.857239
Cu7  Cu  0.42943 0.57057 0  0.01267 Uiso  1  0.858066
Cu8  Cu  0  0  0.57057 0.01267 Uiso  1  0.857553
Cu9  Cu  0.57057 1  0  0.01267 Uiso  1  0.857572
Cu10 Cu  0  0.42943 0.57057 0.01267 Uiso  1  0.857975
Cu11 Cu  0.42943 1  0  0.01267 Uiso  1  0.85724
Cu12 Cu  0  0.57057 0.42943 0.01267 Uiso  1  0.857926
H1   H   0.728 0.728 0.5116 0.01267 Uiso  1  0.143037
H2   H   0.728 0.728 0.0324 0.01267 Uiso  1  0.142764
H3   H   0.5116 0.0324 0.728 0.01267 Uiso  1  0.143174
H4   H   0.0324 0.5116 0.728 0.01267 Uiso  1  0.143157
H5   H   0.728 0.5116 0.0324 0.01267 Uiso  1  0.143044
H6   H   0.728 0.0324 0.5116 0.01267 Uiso  1  0.142885
H7   H   0.5116 0.728 0.728 0.01267 Uiso  1  0.143322
H8   H   0.0324 0.728 0.728 0.01267 Uiso  1  0.142888
H9   H   0.728 0.0324 0.728 0.01267 Uiso  1  0.142879
H10  H   0.728 0.5116 0.728 0.01267 Uiso  1  0.143294
H11  H   0.5116 0.728 0.0324 0.01267 Uiso  1  0.143074
H12  H   0.0324 0.728 0.5116 0.01267 Uiso  1  0.142867
H13  H   0.272 0.272 0.4884 0.01267 Uiso  1  0.143389
H14  H   0.272 0.272 0.9676 0.01267 Uiso  1  0.142756
H15  H   0.9676 0.4884 0.272 0.01267 Uiso  1  0.143036

```

|     |   |        |        |        |         |      |   |           |
|-----|---|--------|--------|--------|---------|------|---|-----------|
| H16 | H | 0.4884 | 0.9676 | 0.272  | 0.01267 | Uiso | 1 | 0.142988  |
| H17 | H | 0.4884 | 0.272  | 0.9676 | 0.01267 | Uiso | 1 | 0.143009  |
| H18 | H | 0.9676 | 0.272  | 0.4884 | 0.01267 | Uiso | 1 | 0.143172  |
| H19 | H | 0.272  | 0.4884 | 0.272  | 0.01267 | Uiso | 1 | 0.1432    |
| H20 | H | 0.272  | 0.9676 | 0.272  | 0.01267 | Uiso | 1 | 0.142789  |
| H21 | H | 0.9676 | 0.272  | 0.272  | 0.01267 | Uiso | 1 | 0.142783  |
| H22 | H | 0.4884 | 0.272  | 0.272  | 0.01267 | Uiso | 1 | 0.14314   |
| H23 | H | 0.272  | 0.4884 | 0.9676 | 0.01267 | Uiso | 1 | 0.143019  |
| H24 | H | 0.272  | 0.9676 | 0.4884 | 0.01267 | Uiso | 1 | 0.143189  |
| C1  | C | 0.257  | 0.969  | 0.387  | 0.01267 | Uiso | 1 | -0.008835 |
| C2  | C | 0.969  | 0.257  | 0.387  | 0.01267 | Uiso | 1 | -0.008817 |
| C3  | C | 0.387  | 0.387  | 0.257  | 0.01267 | Uiso | 1 | -0.008861 |
| C4  | C | 0.387  | 0.387  | 0.969  | 0.01267 | Uiso | 1 | -0.008943 |
| C5  | C | 0.257  | 0.387  | 0.387  | 0.01267 | Uiso | 1 | -0.008872 |
| C6  | C | 0.969  | 0.387  | 0.387  | 0.01267 | Uiso | 1 | -0.0089   |
| C7  | C | 0.387  | 0.257  | 0.969  | 0.01267 | Uiso | 1 | -0.008871 |
| C8  | C | 0.387  | 0.969  | 0.257  | 0.01267 | Uiso | 1 | -0.008826 |
| C9  | C | 0.257  | 0.387  | 0.969  | 0.01267 | Uiso | 1 | -0.008949 |
| C10 | C | 0.969  | 0.387  | 0.257  | 0.01267 | Uiso | 1 | -0.008884 |
| C11 | C | 0.387  | 0.969  | 0.387  | 0.01267 | Uiso | 1 | -0.008927 |
| C12 | C | 0.387  | 0.257  | 0.387  | 0.01267 | Uiso | 1 | -0.008888 |
| C13 | C | 0.031  | 0.743  | 0.613  | 0.01267 | Uiso | 1 | -0.008883 |
| C14 | C | 0.743  | 0.031  | 0.613  | 0.01267 | Uiso | 1 | -0.00887  |
| C15 | C | 0.613  | 0.613  | 0.743  | 0.01267 | Uiso | 1 | -0.00892  |
| C16 | C | 0.613  | 0.613  | 0.031  | 0.01267 | Uiso | 1 | -0.00886  |
| C17 | C | 0.613  | 0.743  | 0.613  | 0.01267 | Uiso | 1 | -0.008928 |
| C18 | C | 0.613  | 0.031  | 0.613  | 0.01267 | Uiso | 1 | -0.008954 |
| C19 | C | 0.743  | 0.613  | 0.031  | 0.01267 | Uiso | 1 | -0.008782 |
| C20 | C | 0.031  | 0.613  | 0.743  | 0.01267 | Uiso | 1 | -0.008857 |
| C21 | C | 0.613  | 0.743  | 0.031  | 0.01267 | Uiso | 1 | -0.008798 |
| C22 | C | 0.613  | 0.031  | 0.743  | 0.01267 | Uiso | 1 | -0.008876 |
| C23 | C | 0.031  | 0.613  | 0.613  | 0.01267 | Uiso | 1 | -0.008949 |
| C24 | C | 0.743  | 0.613  | 0.613  | 0.01267 | Uiso | 1 | -0.008942 |
| C25 | C | 0.5687 | 0.5687 | 0.8377 | 0.01267 | Uiso | 1 | 0.592766  |
| C26 | C | 0.5687 | 0.5687 | 0.0249 | 0.01267 | Uiso | 1 | 0.593173  |
| C27 | C | 0.8377 | 0.0249 | 0.5687 | 0.01267 | Uiso | 1 | 0.593005  |
| C28 | C | 0.0249 | 0.8377 | 0.5687 | 0.01267 | Uiso | 1 | 0.592969  |
| C29 | C | 0.5687 | 0.8377 | 0.0249 | 0.01267 | Uiso | 1 | 0.59294   |
| C30 | C | 0.5687 | 0.0249 | 0.8377 | 0.01267 | Uiso | 1 | 0.592927  |
| C31 | C | 0.8377 | 0.5687 | 0.5687 | 0.01267 | Uiso | 1 | 0.592896  |
| C32 | C | 0.0249 | 0.5687 | 0.5687 | 0.01267 | Uiso | 1 | 0.593165  |
| C33 | C | 0.5687 | 0.0249 | 0.5687 | 0.01267 | Uiso | 1 | 0.593196  |
| C34 | C | 0.5687 | 0.8377 | 0.5687 | 0.01267 | Uiso | 1 | 0.592872  |
| C35 | C | 0.8377 | 0.5687 | 0.0249 | 0.01267 | Uiso | 1 | 0.593017  |
| C36 | C | 0.0249 | 0.5687 | 0.8377 | 0.01267 | Uiso | 1 | 0.592959  |
| C37 | C | 0.4313 | 0.4313 | 0.1623 | 0.01267 | Uiso | 1 | 0.592899  |
| C38 | C | 0.4313 | 0.4313 | 0.9751 | 0.01267 | Uiso | 1 | 0.593275  |
| C39 | C | 0.9751 | 0.1623 | 0.4313 | 0.01267 | Uiso | 1 | 0.592934  |
| C40 | C | 0.1623 | 0.9751 | 0.4313 | 0.01267 | Uiso | 1 | 0.592913  |
| C41 | C | 0.1623 | 0.4313 | 0.9751 | 0.01267 | Uiso | 1 | 0.593132  |
| C42 | C | 0.9751 | 0.4313 | 0.1623 | 0.01267 | Uiso | 1 | 0.593003  |
| C43 | C | 0.4313 | 0.1623 | 0.4313 | 0.01267 | Uiso | 1 | 0.592861  |

|     |   |         |         |         |         |      |   |           |
|-----|---|---------|---------|---------|---------|------|---|-----------|
| C44 | C | 0.4313  | 0.9751  | 0.4313  | 0.01267 | Uiso | 1 | 0.593161  |
| C45 | C | 0.9751  | 0.4313  | 0.4313  | 0.01267 | Uiso | 1 | 0.593158  |
| C46 | C | 0.1623  | 0.4313  | 0.4313  | 0.01267 | Uiso | 1 | 0.592791  |
| C47 | C | 0.4313  | 0.1623  | 0.9751  | 0.01267 | Uiso | 1 | 0.59305   |
| C48 | C | 0.4313  | 0.9751  | 0.1623  | 0.01267 | Uiso | 1 | 0.593018  |
| C49 | C | 0.3006  | 0.9684  | 0.4304  | 0.01267 | Uiso | 1 | -0.109469 |
| C50 | C | 0.9684  | 0.3006  | 0.3006  | 0.01267 | Uiso | 1 | -0.109143 |
| C51 | C | 0.4304  | 0.3006  | 0.3006  | 0.01267 | Uiso | 1 | -0.10967  |
| C52 | C | 0.3006  | 0.4304  | 0.9684  | 0.01267 | Uiso | 1 | -0.10934  |
| C53 | C | 0.3006  | 0.4304  | 0.3006  | 0.01267 | Uiso | 1 | -0.109727 |
| C54 | C | 0.9684  | 0.3006  | 0.4304  | 0.01267 | Uiso | 1 | -0.109514 |
| C55 | C | 0.4304  | 0.3006  | 0.9684  | 0.01267 | Uiso | 1 | -0.109338 |
| C56 | C | 0.3006  | 0.9684  | 0.3006  | 0.01267 | Uiso | 1 | -0.109198 |
| C57 | C | 0.3006  | 0.3006  | 0.9684  | 0.01267 | Uiso | 1 | -0.109083 |
| C58 | C | 0.9684  | 0.4304  | 0.3006  | 0.01267 | Uiso | 1 | -0.109414 |
| C59 | C | 0.4304  | 0.9684  | 0.3006  | 0.01267 | Uiso | 1 | -0.109395 |
| C60 | C | 0.3006  | 0.3006  | 0.4304  | 0.01267 | Uiso | 1 | -0.1098   |
| C61 | C | 0.0316  | 0.6994  | 0.5696  | 0.01267 | Uiso | 1 | -0.109221 |
| C62 | C | 0.6994  | 0.0316  | 0.6994  | 0.01267 | Uiso | 1 | -0.109305 |
| C63 | C | 0.6994  | 0.5696  | 0.6994  | 0.01267 | Uiso | 1 | -0.109758 |
| C64 | C | 0.5696  | 0.6994  | 0.0316  | 0.01267 | Uiso | 1 | -0.109428 |
| C65 | C | 0.5696  | 0.6994  | 0.6994  | 0.01267 | Uiso | 1 | -0.109755 |
| C66 | C | 0.6994  | 0.0316  | 0.5696  | 0.01267 | Uiso | 1 | -0.109241 |
| C67 | C | 0.6994  | 0.5696  | 0.0316  | 0.01267 | Uiso | 1 | -0.109418 |
| C68 | C | 0.0316  | 0.6994  | 0.6994  | 0.01267 | Uiso | 1 | -0.10929  |
| C69 | C | 0.6994  | 0.6994  | 0.0316  | 0.01267 | Uiso | 1 | -0.109204 |
| C70 | C | 0.5696  | 0.0316  | 0.6994  | 0.01267 | Uiso | 1 | -0.109487 |
| C71 | C | 0.0316  | 0.5696  | 0.6994  | 0.01267 | Uiso | 1 | -0.109497 |
| C72 | C | 0.6994  | 0.6994  | 0.5696  | 0.01267 | Uiso | 1 | -0.109536 |
| O1  | O | 0.61201 | 0.49247 | 0.87425 | 0.01267 | Uiso | 1 | -0.52348  |
| O2  | O | 0.49247 | 0.61201 | 0.02127 | 0.01267 | Uiso | 1 | -0.523173 |
| O3  | O | 0.87425 | 0.02127 | 0.61201 | 0.01267 | Uiso | 1 | -0.523068 |
| O4  | O | 0.02127 | 0.87425 | 0.49247 | 0.01267 | Uiso | 1 | -0.523339 |
| O5  | O | 0.61201 | 0.87425 | 0.02127 | 0.01267 | Uiso | 1 | -0.523282 |
| O6  | O | 0.49247 | 0.02127 | 0.87425 | 0.01267 | Uiso | 1 | -0.523135 |
| O7  | O | 0.87425 | 0.61201 | 0.49247 | 0.01267 | Uiso | 1 | -0.523668 |
| O8  | O | 0.02127 | 0.49247 | 0.61201 | 0.01267 | Uiso | 1 | -0.523034 |
| O9  | O | 0.61201 | 0.02127 | 0.49247 | 0.01267 | Uiso | 1 | -0.523292 |
| O10 | O | 0.49247 | 0.87425 | 0.61201 | 0.01267 | Uiso | 1 | -0.523294 |
| O11 | O | 0.87425 | 0.49247 | 0.02127 | 0.01267 | Uiso | 1 | -0.523256 |
| O12 | O | 0.02127 | 0.61201 | 0.87425 | 0.01267 | Uiso | 1 | -0.523121 |
| O13 | O | 0.50753 | 0.38799 | 0.12575 | 0.01267 | Uiso | 1 | -0.523581 |
| O14 | O | 0.38799 | 0.50753 | 0.97873 | 0.01267 | Uiso | 1 | -0.523184 |
| O15 | O | 0.97873 | 0.12575 | 0.38799 | 0.01267 | Uiso | 1 | -0.523399 |
| O16 | O | 0.12575 | 0.97873 | 0.50753 | 0.01267 | Uiso | 1 | -0.523165 |
| O17 | O | 0.12575 | 0.38799 | 0.97873 | 0.01267 | Uiso | 1 | -0.523298 |
| O18 | O | 0.97873 | 0.50753 | 0.12575 | 0.01267 | Uiso | 1 | -0.523237 |
| O19 | O | 0.38799 | 0.12575 | 0.50753 | 0.01267 | Uiso | 1 | -0.523384 |
| O20 | O | 0.50753 | 0.97873 | 0.38799 | 0.01267 | Uiso | 1 | -0.523313 |
| O21 | O | 0.97873 | 0.38799 | 0.50753 | 0.01267 | Uiso | 1 | -0.523084 |
| O22 | O | 0.12575 | 0.50753 | 0.38799 | 0.01267 | Uiso | 1 | -0.523582 |
| O23 | O | 0.50753 | 0.12575 | 0.97873 | 0.01267 | Uiso | 1 | -0.523311 |

|     |   |         |         |         |         |      |   |           |
|-----|---|---------|---------|---------|---------|------|---|-----------|
| O24 | O | 0.38799 | 0.97873 | 0.12575 | 0.01267 | Uiso | 1 | -0.523205 |
| O25 | O | 0.38799 | 0.50753 | 0.12575 | 0.01267 | Uiso | 1 | -0.523551 |
| O26 | O | 0.50753 | 0.38799 | 0.97873 | 0.01267 | Uiso | 1 | -0.523255 |
| O27 | O | 0.12575 | 0.97873 | 0.38799 | 0.01267 | Uiso | 1 | -0.523269 |
| O28 | O | 0.97873 | 0.12575 | 0.50753 | 0.01267 | Uiso | 1 | -0.523079 |
| O29 | O | 0.38799 | 0.12575 | 0.97873 | 0.01267 | Uiso | 1 | -0.523218 |
| O30 | O | 0.50753 | 0.97873 | 0.12575 | 0.01267 | Uiso | 1 | -0.523298 |
| O31 | O | 0.12575 | 0.38799 | 0.50753 | 0.01267 | Uiso | 1 | -0.523439 |
| O32 | O | 0.97873 | 0.50753 | 0.38799 | 0.01267 | Uiso | 1 | -0.523296 |
| O33 | O | 0.38799 | 0.97873 | 0.50753 | 0.01267 | Uiso | 1 | -0.523023 |
| O34 | O | 0.50753 | 0.12575 | 0.38799 | 0.01267 | Uiso | 1 | -0.523667 |
| O35 | O | 0.12575 | 0.50753 | 0.97873 | 0.01267 | Uiso | 1 | -0.523284 |
| O36 | O | 0.97873 | 0.38799 | 0.12575 | 0.01267 | Uiso | 1 | -0.523224 |
| O37 | O | 0.49247 | 0.61201 | 0.87425 | 0.01267 | Uiso | 1 | -0.523365 |
| O38 | O | 0.61201 | 0.49247 | 0.02127 | 0.01267 | Uiso | 1 | -0.523245 |
| O39 | O | 0.02127 | 0.87425 | 0.61201 | 0.01267 | Uiso | 1 | -0.523124 |
| O40 | O | 0.87425 | 0.02127 | 0.49247 | 0.01267 | Uiso | 1 | -0.523451 |
| O41 | O | 0.87425 | 0.61201 | 0.02127 | 0.01267 | Uiso | 1 | -0.523246 |
| O42 | O | 0.02127 | 0.49247 | 0.87425 | 0.01267 | Uiso | 1 | -0.523215 |
| O43 | O | 0.61201 | 0.87425 | 0.49247 | 0.01267 | Uiso | 1 | -0.52372  |
| O44 | O | 0.49247 | 0.02127 | 0.61201 | 0.01267 | Uiso | 1 | -0.523034 |
| O45 | O | 0.02127 | 0.61201 | 0.49247 | 0.01267 | Uiso | 1 | -0.523252 |
| O46 | O | 0.87425 | 0.49247 | 0.61201 | 0.01267 | Uiso | 1 | -0.523385 |
| O47 | O | 0.49247 | 0.87425 | 0.02127 | 0.01267 | Uiso | 1 | -0.523164 |
| O48 | O | 0.61201 | 0.02127 | 0.87425 | 0.01267 | Uiso | 1 | -0.523168 |

```

data_BEYSEF_clean
_audit_creation_date      2014-07-02
_audit_creation_method    'Materials Studio'
_symmetry_space_group_name_H-M  'P1'
_symmetry_Int_Tables_number  1
_symmetry_cell_setting    triclinic
loop_
_symmetry_equiv_pos_as_xyz
  x,y,z
_cell_length_a            15.8189
_cell_length_b            15.8189
_cell_length_c            15.8189
_cell_angle_alpha        100.8450
_cell_angle_beta         113.9490
_cell_angle_gamma        113.9490
loop_
_atom_site_label
_atom_site_type_symbol
_atom_site_fract_x
_atom_site_fract_y
_atom_site_fract_z
_atom_site_U_iso_or_equiv
_atom_site_adp_type
_atom_site_occupancy
_atom_site_charge
Co1  Co   0.49315    0.59117    0.0228 0.01267    Uiso  1    0.503691
Co2  Co   0.00685    0.02965    0.09802 0.01267    Uiso  1    0.50342
Co3  Co   0.43163    0.0228 0.02965    0.01267    Uiso  1    0.504092
Co4  Co   0.06837    0.09802    0.59117 0.01267    Uiso  1    0.503988
Co5  Co   0.50685    0.40883    0.9772 0.01267    Uiso  1    0.503708
Co6  Co   0.99315    0.97035    0.90198 0.01267    Uiso  1    0.503489
Co7  Co   0.56837    0.9772 0.97035    0.01267    Uiso  1    0.504369
Co8  Co   0.93163    0.90198    0.40883 0.01267    Uiso  1    0.503913
H1   H    0.5852 0.7858 0.9972 0.01267    Uiso  1    0.093666
H2   H    0.5245 0.5213 0.7318 0.01267    Uiso  1    0.143294
H3   H    0.6449 0.554 0.8075 0.01267    Uiso  1    0.122978
H4   H    0.6452 0.6835 0.7597 0.01267    Uiso  1    0.150456
H5   H    0.6933 0.7221 0.8772 0.01267    Uiso  1    0.15165
H6   H    0.5725 0.6894 0.8017 0.01267    Uiso  1    0.155692
H7   H    0.3019 0.8888 0.1079 0.01267    Uiso  1    0.073008
H8   H    0.2922 0.6229 0.1485 0.01267    Uiso  1    0.354964
H9   H    0.3648 0.6057 0.1203 0.01267    Uiso  1    0.351444
H10  H    0.9148 0.912 0.2006 0.01267    Uiso  1    0.093928
H11  H    0.9755 0.7073 0.9968 0.01267    Uiso  1    0.142738
H12  H    0.8551 0.6626 0.9091 0.01267    Uiso  1    0.123279
H13  H    0.8548 0.6145 0.0383 0.01267    Uiso  1    0.150417
H14  H    0.8067 0.6839 0.0288 0.01267    Uiso  1    0.151711
H15  H    0.9275 0.7292 0.1169 0.01267    Uiso  1    0.155826
H16  H    0.1981 0.306 0.5869 0.01267    Uiso  1    0.073143
H17  H    0.2078 0.3563 0.3307 0.01267    Uiso  1    0.355256

```

|     |   |        |        |        |         |      |   |          |
|-----|---|--------|--------|--------|---------|------|---|----------|
| H18 | H | 0.1352 | 0.2555 | 0.2409 | 0.01267 | Uiso | 1 | 0.351821 |
| H19 | H | 0.2114 | 0.9972 | 0.912  | 0.01267 | Uiso | 1 | 0.093881 |
| H20 | H | 0.2105 | 0.7318 | 0.7073 | 0.01267 | Uiso | 1 | 0.14282  |
| H21 | H | 0.2535 | 0.8075 | 0.6626 | 0.01267 | Uiso | 1 | 0.123009 |
| H22 | H | 0.0762 | 0.7597 | 0.6145 | 0.01267 | Uiso | 1 | 0.150708 |
| H23 | H | 0.1551 | 0.8772 | 0.6839 | 0.01267 | Uiso | 1 | 0.151776 |
| H24 | H | 0.1123 | 0.8017 | 0.7292 | 0.01267 | Uiso | 1 | 0.155561 |
| H25 | H | 0.2191 | 0.1079 | 0.306  | 0.01267 | Uiso | 1 | 0.072911 |
| H26 | H | 0.5256 | 0.1485 | 0.3563 | 0.01267 | Uiso | 1 | 0.355057 |
| H27 | H | 0.5146 | 0.1203 | 0.2555 | 0.01267 | Uiso | 1 | 0.364889 |
| H28 | H | 0.2886 | 0.2006 | 0.7858 | 0.01267 | Uiso | 1 | 0.09373  |
| H29 | H | 0.2895 | 0.9968 | 0.5213 | 0.01267 | Uiso | 1 | 0.142942 |
| H30 | H | 0.2465 | 0.9091 | 0.554  | 0.01267 | Uiso | 1 | 0.123058 |
| H31 | H | 0.4238 | 0.0383 | 0.6835 | 0.01267 | Uiso | 1 | 0.150344 |
| H32 | H | 0.3449 | 0.0288 | 0.7221 | 0.01267 | Uiso | 1 | 0.151656 |
| H33 | H | 0.3877 | 0.1169 | 0.6894 | 0.01267 | Uiso | 1 | 0.155691 |
| H34 | H | 0.2809 | 0.5869 | 0.8888 | 0.01267 | Uiso | 1 | 0.073076 |
| H35 | H | 0.9744 | 0.3307 | 0.6229 | 0.01267 | Uiso | 1 | 0.354919 |
| H36 | H | 0.9854 | 0.2409 | 0.6057 | 0.01267 | Uiso | 1 | 0.365146 |
| H37 | H | 0.4148 | 0.2142 | 0.0028 | 0.01267 | Uiso | 1 | 0.093805 |
| H38 | H | 0.4755 | 0.4787 | 0.2682 | 0.01267 | Uiso | 1 | 0.143076 |
| H39 | H | 0.3551 | 0.446  | 0.1925 | 0.01267 | Uiso | 1 | 0.123008 |
| H40 | H | 0.3548 | 0.3165 | 0.2403 | 0.01267 | Uiso | 1 | 0.150398 |
| H41 | H | 0.3067 | 0.2779 | 0.1228 | 0.01267 | Uiso | 1 | 0.151904 |
| H42 | H | 0.4275 | 0.3106 | 0.1983 | 0.01267 | Uiso | 1 | 0.155578 |
| H43 | H | 0.6981 | 0.1112 | 0.8921 | 0.01267 | Uiso | 1 | 0.072895 |
| H44 | H | 0.7078 | 0.3771 | 0.8515 | 0.01267 | Uiso | 1 | 0.35478  |
| H45 | H | 0.6352 | 0.3943 | 0.8797 | 0.01267 | Uiso | 1 | 0.364886 |
| H46 | H | 0.0852 | 0.088  | 0.7994 | 0.01267 | Uiso | 1 | 0.093948 |
| H47 | H | 0.0245 | 0.2927 | 0.0032 | 0.01267 | Uiso | 1 | 0.142947 |
| H48 | H | 0.1449 | 0.3374 | 0.0909 | 0.01267 | Uiso | 1 | 0.123189 |
| H49 | H | 0.1452 | 0.3855 | 0.9617 | 0.01267 | Uiso | 1 | 0.150487 |
| H50 | H | 0.1933 | 0.3161 | 0.9712 | 0.01267 | Uiso | 1 | 0.15145  |
| H51 | H | 0.0725 | 0.2708 | 0.8831 | 0.01267 | Uiso | 1 | 0.155846 |
| H52 | H | 0.8019 | 0.694  | 0.4131 | 0.01267 | Uiso | 1 | 0.073163 |
| H53 | H | 0.7922 | 0.6437 | 0.6693 | 0.01267 | Uiso | 1 | 0.355166 |
| H54 | H | 0.8648 | 0.7445 | 0.7591 | 0.01267 | Uiso | 1 | 0.351797 |
| H55 | H | 0.7886 | 0.0028 | 0.088  | 0.01267 | Uiso | 1 | 0.093884 |
| H56 | H | 0.7895 | 0.2682 | 0.2927 | 0.01267 | Uiso | 1 | 0.142938 |
| H57 | H | 0.7465 | 0.1925 | 0.3374 | 0.01267 | Uiso | 1 | 0.123057 |
| H58 | H | 0.9238 | 0.2403 | 0.3855 | 0.01267 | Uiso | 1 | 0.150655 |
| H59 | H | 0.8449 | 0.1228 | 0.3161 | 0.01267 | Uiso | 1 | 0.151702 |
| H60 | H | 0.8877 | 0.1983 | 0.2708 | 0.01267 | Uiso | 1 | 0.15561  |
| H61 | H | 0.7809 | 0.8921 | 0.694  | 0.01267 | Uiso | 1 | 0.072918 |
| H62 | H | 0.4744 | 0.8515 | 0.6437 | 0.01267 | Uiso | 1 | 0.355247 |
| H63 | H | 0.4854 | 0.8797 | 0.7445 | 0.01267 | Uiso | 1 | 0.351563 |
| H64 | H | 0.7114 | 0.7994 | 0.2142 | 0.01267 | Uiso | 1 | 0.093914 |
| H65 | H | 0.7105 | 0.0032 | 0.4787 | 0.01267 | Uiso | 1 | 0.142914 |
| H66 | H | 0.7535 | 0.0909 | 0.446  | 0.01267 | Uiso | 1 | 0.123131 |
| H67 | H | 0.5762 | 0.9617 | 0.3165 | 0.01267 | Uiso | 1 | 0.150593 |
| H68 | H | 0.6551 | 0.9712 | 0.2779 | 0.01267 | Uiso | 1 | 0.151697 |
| H69 | H | 0.6123 | 0.8831 | 0.3106 | 0.01267 | Uiso | 1 | 0.15554  |

|     |   |         |         |         |         |      |   |           |  |
|-----|---|---------|---------|---------|---------|------|---|-----------|--|
| H70 | H | 0.7191  | 0.4131  | 0.1112  | 0.01267 | Uiso | 1 | 0.073004  |  |
| H71 | H | 0.0256  | 0.6693  | 0.3771  | 0.01267 | Uiso | 1 | 0.354753  |  |
| H72 | H | 0.0146  | 0.7591  | 0.3943  | 0.01267 | Uiso | 1 | 0.365185  |  |
| C1  | C | 0.53945 | 0.79004 | 0.01827 | 0.01267 | Uiso | 1 | 0.174482  |  |
| C2  | C | 0.43175 | 0.75727 | 0.07202 | 0.01267 | Uiso | 1 | -0.063439 |  |
| C3  | C | 0.36086 | 0.72226 | 0.1066  | 0.01267 | Uiso | 1 | 0.42314   |  |
| C4  | C | 0.55848 | 0.54337 | 0.87497 | 0.01267 | Uiso | 1 | 0.649119  |  |
| C5  | C | 0.58829 | 0.56751 | 0.80022 | 0.01267 | Uiso | 1 | -0.284193 |  |
| C6  | C | 0.6284  | 0.6754  | 0.8106  | 0.01267 | Uiso | 1 | -0.449278 |  |
| C7  | C | 0.44964 | 0.84354 | 0.0544  | 0.01267 | Uiso | 1 | 0.266658  |  |
| C8  | C | 0.33712 | 0.85621 | 0.09907 | 0.01267 | Uiso | 1 | 0.221029  |  |
| C9  | C | 0.96055 | 0.97882 | 0.25059 | 0.01267 | Uiso | 1 | 0.174079  |  |
| C10 | C | 0.06825 | 0.14027 | 0.32552 | 0.01267 | Uiso | 1 | -0.063443 |  |
| C11 | C | 0.13914 | 0.24574 | 0.3614  | 0.01267 | Uiso | 1 | 0.423221  |  |
| C12 | C | 0.94152 | 0.81649 | 0.98489 | 0.01267 | Uiso | 1 | 0.64867   |  |
| C13 | C | 0.91171 | 0.71193 | 0.97922 | 0.01267 | Uiso | 1 | -0.28402  |  |
| C14 | C | 0.8716  | 0.6822  | 0.047   | 0.01267 | Uiso | 1 | -0.449435 |  |
| C15 | C | 0.05036 | 0.10476 | 0.3939  | 0.01267 | Uiso | 1 | 0.266544  |  |
| C16 | C | 0.16288 | 0.26195 | 0.51909 | 0.01267 | Uiso | 1 | 0.220456  |  |
| C17 | C | 0.22823 | 0.01827 | 0.97882 | 0.01267 | Uiso | 1 | 0.174311  |  |
| C18 | C | 0.31475 | 0.07202 | 0.14027 | 0.01267 | Uiso | 1 | -0.063299 |  |
| C19 | C | 0.38434 | 0.1066  | 0.24574 | 0.01267 | Uiso | 1 | 0.422833  |  |
| C20 | C | 0.3316  | 0.87497 | 0.81649 | 0.01267 | Uiso | 1 | 0.649024  |  |
| C21 | C | 0.23271 | 0.80022 | 0.71193 | 0.01267 | Uiso | 1 | -0.283895 |  |
| C22 | C | 0.1352  | 0.8106  | 0.6822  | 0.01267 | Uiso | 1 | -0.449429 |  |
| C23 | C | 0.21086 | 0.0544  | 0.10476 | 0.01267 | Uiso | 1 | 0.2664    |  |
| C24 | C | 0.24286 | 0.09907 | 0.26195 | 0.01267 | Uiso | 1 | 0.22072   |  |
| C25 | C | 0.27177 | 0.25059 | 0.79004 | 0.01267 | Uiso | 1 | 0.174143  |  |
| C26 | C | 0.18525 | 0.32552 | 0.75727 | 0.01267 | Uiso | 1 | -0.063586 |  |
| C27 | C | 0.11566 | 0.3614  | 0.72226 | 0.01267 | Uiso | 1 | 0.422877  |  |
| C28 | C | 0.1684  | 0.98489 | 0.54337 | 0.01267 | Uiso | 1 | 0.648946  |  |
| C29 | C | 0.26729 | 0.97922 | 0.56751 | 0.01267 | Uiso | 1 | -0.283897 |  |
| C30 | C | 0.3648  | 0.047   | 0.6754  | 0.01267 | Uiso | 1 | -0.449324 |  |
| C31 | C | 0.28914 | 0.3939  | 0.84354 | 0.01267 | Uiso | 1 | 0.266593  |  |
| C32 | C | 0.25714 | 0.51909 | 0.85621 | 0.01267 | Uiso | 1 | 0.220728  |  |
| C33 | C | 0.46055 | 0.20996 | 0.98173 | 0.01267 | Uiso | 1 | 0.174486  |  |
| C34 | C | 0.56825 | 0.24273 | 0.92798 | 0.01267 | Uiso | 1 | -0.063534 |  |
| C35 | C | 0.63914 | 0.27774 | 0.8934  | 0.01267 | Uiso | 1 | 0.422884  |  |
| C36 | C | 0.44152 | 0.45663 | 0.12503 | 0.01267 | Uiso | 1 | 0.649005  |  |
| C37 | C | 0.41171 | 0.43249 | 0.19978 | 0.01267 | Uiso | 1 | -0.284012 |  |
| C38 | C | 0.3716  | 0.3246  | 0.1894  | 0.01267 | Uiso | 1 | -0.4495   |  |
| C39 | C | 0.55036 | 0.15646 | 0.9456  | 0.01267 | Uiso | 1 | 0.266636  |  |
| C40 | C | 0.66288 | 0.14379 | 0.90093 | 0.01267 | Uiso | 1 | 0.220823  |  |
| C41 | C | 0.03945 | 0.02118 | 0.74941 | 0.01267 | Uiso | 1 | 0.174152  |  |
| C42 | C | 0.93175 | 0.85973 | 0.67448 | 0.01267 | Uiso | 1 | -0.06334  |  |
| C43 | C | 0.86086 | 0.75426 | 0.6386  | 0.01267 | Uiso | 1 | 0.423235  |  |
| C44 | C | 0.05848 | 0.18351 | 0.01511 | 0.01267 | Uiso | 1 | 0.648664  |  |
| C45 | C | 0.08829 | 0.28807 | 0.02078 | 0.01267 | Uiso | 1 | -0.284111 |  |
| C46 | C | 0.1284  | 0.3178  | 0.953   | 0.01267 | Uiso | 1 | -0.449323 |  |
| C47 | C | 0.94964 | 0.89524 | 0.6061  | 0.01267 | Uiso | 1 | 0.266576  |  |
| C48 | C | 0.83712 | 0.73805 | 0.48091 | 0.01267 | Uiso | 1 | 0.220536  |  |
| C49 | C | 0.77177 | 0.98173 | 0.02118 | 0.01267 | Uiso | 1 | 0.174245  |  |

|     |   |         |         |         |         |      |   |           |
|-----|---|---------|---------|---------|---------|------|---|-----------|
| C50 | C | 0.68525 | 0.92798 | 0.85973 | 0.01267 | Uiso | 1 | -0.063189 |
| C51 | C | 0.61566 | 0.8934  | 0.75426 | 0.01267 | Uiso | 1 | 0.423133  |
| C52 | C | 0.6684  | 0.12503 | 0.18351 | 0.01267 | Uiso | 1 | 0.648666  |
| C53 | C | 0.76729 | 0.19978 | 0.28807 | 0.01267 | Uiso | 1 | -0.283652 |
| C54 | C | 0.8648  | 0.1894  | 0.3178  | 0.01267 | Uiso | 1 | -0.449601 |
| C55 | C | 0.78914 | 0.9456  | 0.89524 | 0.01267 | Uiso | 1 | 0.266592  |
| C56 | C | 0.75714 | 0.90093 | 0.73805 | 0.01267 | Uiso | 1 | 0.22071   |
| C57 | C | 0.72823 | 0.74941 | 0.20996 | 0.01267 | Uiso | 1 | 0.174284  |
| C58 | C | 0.81475 | 0.67448 | 0.24273 | 0.01267 | Uiso | 1 | -0.063648 |
| C59 | C | 0.88434 | 0.6386  | 0.27774 | 0.01267 | Uiso | 1 | 0.422861  |
| C60 | C | 0.8316  | 0.01511 | 0.45663 | 0.01267 | Uiso | 1 | 0.649274  |
| C61 | C | 0.73271 | 0.02078 | 0.43249 | 0.01267 | Uiso | 1 | -0.283983 |
| C62 | C | 0.6352  | 0.953   | 0.3246  | 0.01267 | Uiso | 1 | -0.449201 |
| C63 | C | 0.71086 | 0.6061  | 0.15646 | 0.01267 | Uiso | 1 | 0.26649   |
| C64 | C | 0.74286 | 0.48091 | 0.14379 | 0.01267 | Uiso | 1 | 0.220792  |
| N1  | N | 0.49048 | 0.7223  | 0.0479  | 0.01267 | Uiso | 1 | -0.284754 |
| N2  | N | 0.33635 | 0.64055 | 0.12762 | 0.01267 | Uiso | 1 | -0.681794 |
| N3  | N | 0.31418 | 0.77498 | 0.11926 | 0.01267 | Uiso | 1 | -0.436083 |
| N4  | N | 0.51901 | 0.86503 | 0.02044 | 0.01267 | Uiso | 1 | -0.324864 |
| N5  | N | 0.4038  | 0.89723 | 0.06783 | 0.01267 | Uiso | 1 | -0.292362 |
| N6  | N | 0.00952 | 0.05742 | 0.23182 | 0.01267 | Uiso | 1 | -0.28434  |
| N7  | N | 0.16365 | 0.29127 | 0.3042  | 0.01267 | Uiso | 1 | -0.682355 |
| N8  | N | 0.18582 | 0.30508 | 0.4608  | 0.01267 | Uiso | 1 | -0.435934 |
| N9  | N | 0.98099 | 0.00143 | 0.34602 | 0.01267 | Uiso | 1 | -0.324958 |
| N10 | N | 0.0962  | 0.16403 | 0.49343 | 0.01267 | Uiso | 1 | -0.292531 |
| N11 | N | 0.3256  | 0.0479  | 0.05742 | 0.01267 | Uiso | 1 | -0.284747 |
| N12 | N | 0.48707 | 0.12762 | 0.29127 | 0.01267 | Uiso | 1 | -0.692093 |
| N13 | N | 0.34428 | 0.11926 | 0.30508 | 0.01267 | Uiso | 1 | -0.435995 |
| N14 | N | 0.15541 | 0.02044 | 0.00143 | 0.01267 | Uiso | 1 | -0.324981 |
| N15 | N | 0.1706  | 0.06783 | 0.16403 | 0.01267 | Uiso | 1 | -0.292446 |
| N16 | N | 0.1744  | 0.23182 | 0.7223  | 0.01267 | Uiso | 1 | -0.284202 |
| N17 | N | 0.01293 | 0.3042  | 0.64055 | 0.01267 | Uiso | 1 | -0.692026 |
| N18 | N | 0.15572 | 0.4608  | 0.77498 | 0.01267 | Uiso | 1 | -0.43606  |
| N19 | N | 0.34459 | 0.34602 | 0.86503 | 0.01267 | Uiso | 1 | -0.325387 |
| N20 | N | 0.3294  | 0.49343 | 0.89723 | 0.01267 | Uiso | 1 | -0.292795 |
| N21 | N | 0.50952 | 0.2777  | 0.9521  | 0.01267 | Uiso | 1 | -0.284415 |
| N22 | N | 0.66365 | 0.35945 | 0.87238 | 0.01267 | Uiso | 1 | -0.691689 |
| N23 | N | 0.68582 | 0.22502 | 0.88074 | 0.01267 | Uiso | 1 | -0.436129 |
| N24 | N | 0.48099 | 0.13497 | 0.97956 | 0.01267 | Uiso | 1 | -0.324959 |
| N25 | N | 0.5962  | 0.10277 | 0.93217 | 0.01267 | Uiso | 1 | -0.29254  |
| N26 | N | 0.99048 | 0.94258 | 0.76818 | 0.01267 | Uiso | 1 | -0.284637 |
| N27 | N | 0.83635 | 0.70873 | 0.6958  | 0.01267 | Uiso | 1 | -0.682349 |
| N28 | N | 0.81418 | 0.69492 | 0.5392  | 0.01267 | Uiso | 1 | -0.436072 |
| N29 | N | 0.01901 | 0.99857 | 0.65398 | 0.01267 | Uiso | 1 | -0.324935 |
| N30 | N | 0.9038  | 0.83597 | 0.50657 | 0.01267 | Uiso | 1 | -0.292489 |
| N31 | N | 0.6744  | 0.9521  | 0.94258 | 0.01267 | Uiso | 1 | -0.28464  |
| N32 | N | 0.51293 | 0.87238 | 0.70873 | 0.01267 | Uiso | 1 | -0.681912 |
| N33 | N | 0.65572 | 0.88074 | 0.69492 | 0.01267 | Uiso | 1 | -0.435865 |
| N34 | N | 0.84459 | 0.97956 | 0.99857 | 0.01267 | Uiso | 1 | -0.325214 |
| N35 | N | 0.8294  | 0.93217 | 0.83597 | 0.01267 | Uiso | 1 | -0.292776 |
| N36 | N | 0.8256  | 0.76818 | 0.2777  | 0.01267 | Uiso | 1 | -0.284331 |
| N37 | N | 0.98707 | 0.6958  | 0.35945 | 0.01267 | Uiso | 1 | -0.692071 |

|     |   |         |         |         |         |      |   |           |
|-----|---|---------|---------|---------|---------|------|---|-----------|
| N38 | N | 0.84428 | 0.5392  | 0.22502 | 0.01267 | Uiso | 1 | -0.436317 |
| N39 | N | 0.65541 | 0.65398 | 0.13497 | 0.01267 | Uiso | 1 | -0.325292 |
| N40 | N | 0.6706  | 0.50657 | 0.10277 | 0.01267 | Uiso | 1 | -0.292585 |
| O1  | O | 0.53633 | 0.59896 | 0.91719 | 0.01267 | Uiso | 1 | -0.488677 |
| O2  | O | 0.55528 | 0.46655 | 0.88933 | 0.01267 | Uiso | 1 | -0.532084 |
| O3  | O | 0.96367 | 0.88086 | 0.06263 | 0.01267 | Uiso | 1 | -0.488713 |
| O4  | O | 0.94472 | 0.83405 | 0.91127 | 0.01267 | Uiso | 1 | -0.528636 |
| O5  | O | 0.31823 | 0.91719 | 0.88086 | 0.01267 | Uiso | 1 | -0.489191 |
| O6  | O | 0.42278 | 0.88933 | 0.83405 | 0.01267 | Uiso | 1 | -0.529265 |
| O7  | O | 0.18177 | 0.06263 | 0.59896 | 0.01267 | Uiso | 1 | -0.488713 |
| O8  | O | 0.07722 | 0.91127 | 0.46655 | 0.01267 | Uiso | 1 | -0.532504 |
| O9  | O | 0.46367 | 0.40104 | 0.08281 | 0.01267 | Uiso | 1 | -0.488851 |
| O10 | O | 0.44472 | 0.53345 | 0.11067 | 0.01267 | Uiso | 1 | -0.528392 |
| O11 | O | 0.03633 | 0.11914 | 0.93737 | 0.01267 | Uiso | 1 | -0.488657 |
| O12 | O | 0.05528 | 0.16595 | 0.08873 | 0.01267 | Uiso | 1 | -0.528646 |
| O13 | O | 0.68177 | 0.08281 | 0.11914 | 0.01267 | Uiso | 1 | -0.489222 |
| O14 | O | 0.57722 | 0.11067 | 0.16595 | 0.01267 | Uiso | 1 | -0.532304 |
| O15 | O | 0.81823 | 0.93737 | 0.40104 | 0.01267 | Uiso | 1 | -0.48892  |
| O16 | O | 0.92278 | 0.08873 | 0.53345 | 0.01267 | Uiso | 1 | -0.532723 |

```

data_DUPVER_clean
_cell_length_a 14.4022
_cell_length_b 25.92
_cell_length_c 17.4395
_cell_angle_alpha 90
_cell_angle_beta 107.384
_cell_angle_gamma 90

_symmetry_space_group_name_H-M P 1
_symmetry_int_tables_number 1

```

```

loop_
_symmetry_equiv_pos_as_xyz
'x,y,z'

```

```

loop_
_atom_site_label
_atom_site_occupancy
_atom_site_fract_x
_atom_site_fract_y
_atom_site_fract_z
_atom_site_thermal_displace_type
_atom_site_B_iso_or_equiv
_atom_site_type_symbol
_atom_site_charge
Zn1 1 0.83466 0.00072 0.1257 Biso 1.00 Zn 0.878223
Zn2 1 0.89769 0.06598 0.31073 Biso 1.00 Zn 0.871029
Zn3 1 0.04064 0.31969 0.77347 Biso 1.00 Zn 0.904714
O1 1 0.9379 0.0707 0.427 Biso 1.00 O -0.498626
O2 1 0.0464 0.24519 0.757 Biso 1.00 O -0.549066
O3 1 0.7624 0.4351 0.4838 Biso 1.00 O -0.479157
O4 1 0.9232 0.3584 0.7441 Biso 1.00 O -0.576494
O5 1 0.5127 0.4171 0.7793 Biso 1.00 O -0.515085
C1 1 0.9442 0.1176 0.4499 Biso 1.00 C 0.555184
C2 1 0.9791 0.1754 0.5685 Biso 1.00 C -0.116104
H1 1 0.9536 0.2026 0.5337 Biso 1.00 H 0.133095
O6 1 0.9725 0.2729 0.6334 Biso 1.00 O -0.537546
O7 1 0.9194 0.1541 0.4027 Biso 1.00 O -0.448847
O8 1 0.4363 0.445 0.6569 Biso 1.00 O -0.573469
C3 1 0.6055 0.4379 0.6109 Biso 1.00 C -0.113422
H2 1 0.5534 0.4562 0.5776 Biso 1.00 H 0.138596
C4 1 0.5995 0.4183 0.6836 Biso 1.00 C -0.02065
O9 1 0.6372 0.4842 0.4744 Biso 1.00 O -0.497268
C5 1 0.0103 0.2377 0.6811 Biso 1.00 C 0.575311
C6 1 0.0208 0.0859 0.59 Biso 1.00 C -0.105345
H3 1 0.0219 0.0527 0.57 Biso 1.00 H 0.136349
C7 1 0.9824 0.1256 0.5377 Biso 1.00 C -0.023803
C8 1 0.0536 0.144 0.7039 Biso 1.00 C -0.108596
H4 1 0.0767 0.1497 0.7589 Biso 1.00 H 0.141978
C9 1 0.7642 0.4033 0.6385 Biso 1.00 C -0.12623

```

|     |   |         |         |         |      |      |    |           |
|-----|---|---------|---------|---------|------|------|----|-----------|
| H5  | 1 | 0.8195  | 0.3974  | 0.6227  | Biso | 1.00 | H  | 0.111331  |
| C10 | 1 | 0.0139  | 0.1843  | 0.6511  | Biso | 1.00 | C  | -0.019363 |
| C11 | 1 | 0.0578  | 0.0945  | 0.6719  | Biso | 1.00 | C  | -0.026866 |
| C12 | 1 | 0.6782  | 0.3916  | 0.7334  | Biso | 1.00 | C  | -0.114982 |
| H6  | 1 | 0.6742  | 0.3783  | 0.7818  | Biso | 1.00 | H  | 0.136397  |
| C13 | 1 | 0.6885  | 0.4303  | 0.5881  | Biso | 1.00 | C  | -0.015201 |
| C14 | 1 | 0.5103  | 0.4276  | 0.7088  | Biso | 1.00 | C  | 0.60772   |
| C15 | 1 | 0.7613  | 0.3846  | 0.7122  | Biso | 1.00 | C  | -0.013142 |
| O10 | 1 | 0.8395  | 0.3289  | 0.8195  | Biso | 1.00 | O  | -0.433867 |
| C16 | 1 | 0.6971  | 0.4507  | 0.5094  | Biso | 1.00 | C  | 0.568585  |
| C17 | 1 | 0.8476  | 0.3541  | 0.7654  | Biso | 1.00 | C  | 0.598954  |
| N1  | 1 | 0.7679  | 0.0905  | 0.2469  | Biso | 1.00 | N  | -0.375469 |
| N2  | 1 | 0.714   | 0.0393  | 0.1244  | Biso | 1.00 | N  | -0.351169 |
| N3  | 1 | 0.6313  | 0.1386  | 0.2291  | Biso | 1.00 | N  | -0.316724 |
| N4  | 1 | 0.4634  | 0.1261  | 0.0708  | Biso | 1.00 | N  | -0.591975 |
| H7  | 1 | 0.4183  | 0.1192  | 0.0271  | Biso | 1.00 | H  | 0.370353  |
| H8  | 1 | 0.4564  | 0.1514  | 0.1006  | Biso | 1.00 | H  | 0.35749   |
| C18 | 1 | 0.6201  | 0.1057  | 0.1641  | Biso | 1.00 | C  | -0.039891 |
| C19 | 1 | 0.7038  | 0.0759  | 0.1754  | Biso | 1.00 | C  | 0.306594  |
| N5  | 1 | 0.5509  | 0.0591  | 0.0436  | Biso | 1.00 | N  | -0.377262 |
| C20 | 1 | 0.6331  | 0.0332  | 0.0611  | Biso | 1.00 | C  | 0.244534  |
| H9  | 1 | 0.6361  | 0.0073  | 0.0251  | Biso | 1.00 | H  | 0.079615  |
| C21 | 1 | 0.7202  | 0.1272  | 0.2763  | Biso | 1.00 | C  | 0.18447   |
| H10 | 1 | 0.7476  | 0.1431  | 0.3257  | Biso | 1.00 | H  | 0.101783  |
| C22 | 1 | 0.5427  | 0.0982  | 0.0919  | Biso | 1.00 | C  | 0.432716  |
| C23 | 1 | 0.0995  | 0.0502  | 0.727   | Biso | 1.00 | C  | 0.611875  |
| O11 | 1 | 0.1177  | 0.0566  | 0.8011  | Biso | 1.00 | O  | -0.528647 |
| O12 | 1 | 0.1158  | 0.01    | 0.6951  | Biso | 1.00 | O  | -0.555074 |
| Zn4 | 1 | 0.66534 | 0.50072 | 0.3743  | Biso | 1.00 | Zn | 0.878399  |
| Zn5 | 1 | 0.60231 | 0.56598 | 0.18927 | Biso | 1.00 | Zn | 0.870618  |
| Zn6 | 1 | 0.45936 | 0.81969 | 0.72653 | Biso | 1.00 | Zn | 0.904766  |
| O13 | 1 | 0.5621  | 0.5707  | 0.073   | Biso | 1.00 | O  | -0.501545 |
| O14 | 1 | 0.4536  | 0.74519 | 0.743   | Biso | 1.00 | O  | -0.54941  |
| O15 | 1 | 0.7376  | 0.9351  | 0.0162  | Biso | 1.00 | O  | -0.496567 |
| O16 | 1 | 0.5768  | 0.8584  | 0.7559  | Biso | 1.00 | O  | -0.57231  |
| O17 | 1 | 0.9873  | 0.9171  | 0.7207  | Biso | 1.00 | O  | -0.515829 |
| C24 | 1 | 0.5558  | 0.6176  | 0.0501  | Biso | 1.00 | C  | 0.555925  |
| C25 | 1 | 0.5209  | 0.6754  | 0.9315  | Biso | 1.00 | C  | -0.116462 |
| H11 | 1 | 0.5464  | 0.7026  | 0.9663  | Biso | 1.00 | H  | 0.132976  |
| O18 | 1 | 0.5275  | 0.7729  | 0.8666  | Biso | 1.00 | O  | -0.534775 |
| O19 | 1 | 0.5806  | 0.6541  | 0.0973  | Biso | 1.00 | O  | -0.45301  |
| O20 | 1 | 0.0637  | 0.945   | 0.8431  | Biso | 1.00 | O  | -0.571246 |
| C26 | 1 | 0.8945  | 0.9379  | 0.8891  | Biso | 1.00 | C  | -0.112571 |
| H12 | 1 | 0.9466  | 0.9562  | 0.9224  | Biso | 1.00 | H  | 0.138824  |
| C27 | 1 | 0.9005  | 0.9183  | 0.8164  | Biso | 1.00 | C  | -0.019901 |
| O21 | 1 | 0.8628  | 0.9842  | 0.0256  | Biso | 1.00 | O  | -0.498817 |
| C28 | 1 | 0.4897  | 0.7377  | 0.8189  | Biso | 1.00 | C  | 0.574912  |
| C29 | 1 | 0.4792  | 0.5859  | 0.91    | Biso | 1.00 | C  | -0.10511  |
| H13 | 1 | 0.4781  | 0.5527  | 0.93    | Biso | 1.00 | H  | 0.136301  |
| C30 | 1 | 0.5176  | 0.6256  | 0.9623  | Biso | 1.00 | C  | -0.023235 |
| C31 | 1 | 0.4464  | 0.644   | 0.7961  | Biso | 1.00 | C  | -0.108571 |
| H14 | 1 | 0.4233  | 0.6497  | 0.7411  | Biso | 1.00 | H  | 0.141948  |

|     |   |         |         |         |         |      |      |           |           |
|-----|---|---------|---------|---------|---------|------|------|-----------|-----------|
| C32 | 1 | 0.7358  | 0.9033  | 0.8615  | Biso    | 1.00 | C    | -0.124194 |           |
| H15 | 1 | 0.6805  | 0.8974  | 0.8773  | Biso    | 1.00 | H    | 0.111965  |           |
| C33 | 1 | 0.4861  | 0.6843  | 0.8489  | Biso    | 1.00 | C    | -0.019284 |           |
| C34 | 1 | 0.4422  | 0.5945  | 0.8281  | Biso    | 1.00 | C    | -0.028421 |           |
| C35 | 1 | 0.8218  | 0.8916  | 0.7666  | Biso    | 1.00 | C    | -0.115942 |           |
| H16 | 1 | 0.8258  | 0.8783  | 0.7182  | Biso    | 1.00 | H    | 0.13654   |           |
| C36 | 1 | 0.8115  | 0.9303  | 0.9119  | Biso    | 1.00 | C    | -0.01361  |           |
| C37 | 1 | 0.9897  | 0.9276  | 0.7912  | Biso    | 1.00 | C    | 0.607286  |           |
| C38 | 1 | 0.7387  | 0.8846  | 0.7878  | Biso    | 1.00 | C    | -0.01339  |           |
| O22 | 1 | 0.6605  | 0.8289  | 0.6805  | Biso    | 1.00 | O    | -0.419729 |           |
| C39 | 1 | 0.8029  | 0.9507  | 0.9906  | Biso    | 1.00 | C    | 0.569965  |           |
| C40 | 1 | 0.6524  | 0.8541  | 0.7346  | Biso    | 1.00 | C    | 0.597532  |           |
| N6  | 1 | 0.7321  | 0.5905  | 0.2531  | Biso    | 1.00 | N    | -0.375592 |           |
| N7  | 1 | 0.786   | 0.5393  | 0.3756  | Biso    | 1.00 | N    | -0.352905 |           |
| N8  | 1 | 0.8687  | 0.6386  | 0.2709  | Biso    | 1.00 | N    | -0.317048 |           |
| N9  | 1 | 0.0366  | 0.6261  | 0.4292  | Biso    | 1.00 | N    | -0.593158 |           |
| H17 | 1 | 0.0817  | 0.6192  | 0.4729  | Biso    | 1.00 | H    | 0.370281  |           |
| H18 | 1 | 0.0436  | 0.6514  | 0.3994  | Biso    | 1.00 | H    | 0.357549  |           |
| C41 | 1 | 0.8799  | 0.6057  | 0.3359  | Biso    | 1.00 | C    | -0.040617 |           |
| C42 | 1 | 0.7962  | 0.5759  | 0.3246  | Biso    | 1.00 | C    | 0.306421  |           |
| N10 | 1 | 0.9491  | 0.5591  | 0.4564  | Biso    | 1.00 | N    | -0.377032 |           |
| C43 | 1 | 0.8669  | 0.5332  | 0.4389  | Biso    | 1.00 | C    | 0.243504  |           |
| H19 | 1 | 0.8639  | 0.5073  | 0.4749  | Biso    | 1.00 | H    | 0.07883   |           |
| C44 | 1 | 0.7798  | 0.6272  | 0.2237  | Biso    | 1.00 | C    | 0.184844  |           |
| H20 | 1 | 0.7524  | 0.6431  | 0.1743  | Biso    | 1.00 | H    | 0.10204   |           |
| C45 | 1 | 0.9573  | 0.5982  | 0.4081  | Biso    | 1.00 | C    | 0.433081  |           |
| C46 | 1 | 0.4005  | 0.5502  | 0.773   | Biso    | 1.00 | C    | 0.611114  |           |
| O23 | 1 | 0.3823  | 0.5566  | 0.6989  | Biso    | 1.00 | O    | -0.52712  |           |
| O24 | 1 | 0.3842  | 0.51    | 0.8049  | Biso    | 1.00 | O    | -0.55396  |           |
| Zn7 | 1 | 0.16534 |         | 0.99928 | 0.8743  | Biso | 1.00 | Zn        | 0.87776   |
| Zn8 | 1 | 0.10231 |         | 0.93402 | 0.68927 | Biso | 1.00 | Zn        | 0.870574  |
| Zn9 | 1 | 0.95936 |         | 0.68031 | 0.22653 | Biso | 1.00 | Zn        | 0.905304  |
| O25 | 1 | 0.0621  | 0.9293  | 0.573   | Biso    | 1.00 | O    | -0.501015 |           |
| O26 | 1 | 0.9536  | 0.75481 |         | 0.243   | Biso | 1.00 | O         | -0.551583 |
| O27 | 1 | 0.2376  | 0.5649  | 0.5162  | Biso    | 1.00 | O    | -0.484254 |           |
| O28 | 1 | 0.0768  | 0.6416  | 0.2559  | Biso    | 1.00 | O    | -0.572894 |           |
| O29 | 1 | 0.4873  | 0.5829  | 0.2207  | Biso    | 1.00 | O    | -0.513715 |           |
| C47 | 1 | 0.0558  | 0.8824  | 0.5501  | Biso    | 1.00 | C    | 0.55544   |           |
| C48 | 1 | 0.0209  | 0.8246  | 0.4315  | Biso    | 1.00 | C    | -0.116686 |           |
| H21 | 1 | 0.0464  | 0.7974  | 0.4663  | Biso    | 1.00 | H    | 0.133054  |           |
| O30 | 1 | 0.0275  | 0.7271  | 0.3666  | Biso    | 1.00 | O    | -0.543368 |           |
| O31 | 1 | 0.0806  | 0.8459  | 0.5973  | Biso    | 1.00 | O    | -0.446109 |           |
| O32 | 1 | 0.5637  | 0.555   | 0.3431  | Biso    | 1.00 | O    | -0.567413 |           |
| C49 | 1 | 0.3945  | 0.5621  | 0.3891  | Biso    | 1.00 | C    | -0.110173 |           |
| H22 | 1 | 0.4466  | 0.5438  | 0.4224  | Biso    | 1.00 | H    | 0.139185  |           |
| C50 | 1 | 0.4005  | 0.5817  | 0.3164  | Biso    | 1.00 | C    | -0.020413 |           |
| O33 | 1 | 0.3628  | 0.5158  | 0.5256  | Biso    | 1.00 | O    | -0.496658 |           |
| C51 | 1 | 0.9897  | 0.7623  | 0.3189  | Biso    | 1.00 | C    | 0.575637  |           |
| C52 | 1 | 0.9792  | 0.9141  | 0.41    | Biso    | 1.00 | C    | -0.105414 |           |
| H23 | 1 | 0.9781  | 0.9473  | 0.43    | Biso    | 1.00 | H    | 0.13589   |           |
| C53 | 1 | 0.0176  | 0.8744  | 0.4623  | Biso    | 1.00 | C    | -0.024075 |           |
| C54 | 1 | 0.9464  | 0.856   | 0.2961  | Biso    | 1.00 | C    | -0.108845 |           |

|      |   |         |         |         |      |      |    |           |
|------|---|---------|---------|---------|------|------|----|-----------|
| H24  | 1 | 0.9233  | 0.8503  | 0.2411  | Biso | 1.00 | H  | 0.142324  |
| C55  | 1 | 0.2358  | 0.5967  | 0.3615  | Biso | 1.00 | C  | -0.125458 |
| H25  | 1 | 0.1805  | 0.6026  | 0.3773  | Biso | 1.00 | H  | 0.111923  |
| C56  | 1 | 0.9861  | 0.8157  | 0.3489  | Biso | 1.00 | C  | -0.01867  |
| C57  | 1 | 0.9422  | 0.9055  | 0.3281  | Biso | 1.00 | C  | -0.027126 |
| C58  | 1 | 0.3218  | 0.6084  | 0.2666  | Biso | 1.00 | C  | -0.114639 |
| H26  | 1 | 0.3258  | 0.6217  | 0.2182  | Biso | 1.00 | H  | 0.13676   |
| C59  | 1 | 0.3115  | 0.5697  | 0.4119  | Biso | 1.00 | C  | -0.013208 |
| C60  | 1 | 0.4897  | 0.5724  | 0.2912  | Biso | 1.00 | C  | 0.60629   |
| C61  | 1 | 0.2387  | 0.6154  | 0.2878  | Biso | 1.00 | C  | -0.01169  |
| O34  | 1 | 0.1605  | 0.6711  | 0.1805  | Biso | 1.00 | O  | -0.419808 |
| C62  | 1 | 0.3029  | 0.5493  | 0.4906  | Biso | 1.00 | C  | 0.568712  |
| C63  | 1 | 0.1524  | 0.6459  | 0.2346  | Biso | 1.00 | C  | 0.598112  |
| N11  | 1 | 0.2321  | 0.9095  | 0.7531  | Biso | 1.00 | N  | -0.375842 |
| N12  | 1 | 0.286   | 0.9607  | 0.8756  | Biso | 1.00 | N  | -0.354236 |
| N13  | 1 | 0.3687  | 0.8614  | 0.7709  | Biso | 1.00 | N  | -0.317296 |
| N14  | 1 | 0.5366  | 0.8739  | 0.9292  | Biso | 1.00 | N  | -0.596923 |
| H27  | 1 | 0.5817  | 0.8808  | 0.9729  | Biso | 1.00 | H  | 0.370712  |
| H28  | 1 | 0.5436  | 0.8486  | 0.8994  | Biso | 1.00 | H  | 0.357265  |
| C64  | 1 | 0.3799  | 0.8943  | 0.8359  | Biso | 1.00 | C  | -0.041794 |
| C65  | 1 | 0.2962  | 0.9241  | 0.8246  | Biso | 1.00 | C  | 0.306327  |
| N15  | 1 | 0.4491  | 0.9409  | 0.9564  | Biso | 1.00 | N  | -0.377955 |
| C66  | 1 | 0.3669  | 0.9668  | 0.9389  | Biso | 1.00 | C  | 0.242717  |
| H29  | 1 | 0.3639  | 0.9927  | 0.9749  | Biso | 1.00 | H  | 0.078366  |
| C67  | 1 | 0.2798  | 0.8728  | 0.7237  | Biso | 1.00 | C  | 0.183025  |
| H30  | 1 | 0.2524  | 0.8569  | 0.6743  | Biso | 1.00 | H  | 0.101589  |
| C68  | 1 | 0.4573  | 0.9018  | 0.9081  | Biso | 1.00 | C  | 0.433587  |
| C69  | 1 | 0.9005  | 0.9498  | 0.273   | Biso | 1.00 | C  | 0.611838  |
| O35  | 1 | 0.8823  | 0.9434  | 0.1989  | Biso | 1.00 | O  | -0.527168 |
| O36  | 1 | 0.8842  | 0.99    | 0.3049  | Biso | 1.00 | O  | -0.557403 |
| Zn10 | 1 | 0.33466 | 0.49928 | 0.6257  | Biso | 1.00 | Zn | 0.878284  |
| Zn11 | 1 | 0.39769 | 0.43402 | 0.81073 | Biso | 1.00 | Zn | 0.870013  |
| Zn12 | 1 | 0.54064 | 0.18031 | 0.27347 | Biso | 1.00 | Zn | 0.904623  |
| O37  | 1 | 0.4379  | 0.4293  | 0.927   | Biso | 1.00 | O  | -0.500365 |
| O38  | 1 | 0.5464  | 0.25481 | 0.257   | Biso | 1.00 | O  | -0.550689 |
| O39  | 1 | 0.2624  | 0.0649  | 0.9838  | Biso | 1.00 | O  | -0.481101 |
| O40  | 1 | 0.4232  | 0.1416  | 0.2441  | Biso | 1.00 | O  | -0.573891 |
| O41  | 1 | 0.0127  | 0.0829  | 0.2793  | Biso | 1.00 | O  | -0.51604  |
| C70  | 1 | 0.4442  | 0.3824  | 0.9499  | Biso | 1.00 | C  | 0.554885  |
| C71  | 1 | 0.4791  | 0.3246  | 0.0685  | Biso | 1.00 | C  | -0.117226 |
| H31  | 1 | 0.4536  | 0.2974  | 0.0337  | Biso | 1.00 | H  | 0.133218  |
| O42  | 1 | 0.4725  | 0.2271  | 0.1334  | Biso | 1.00 | O  | -0.541702 |
| O43  | 1 | 0.4194  | 0.3459  | 0.9027  | Biso | 1.00 | O  | -0.438943 |
| O44  | 1 | 0.9363  | 0.055   | 0.1569  | Biso | 1.00 | O  | -0.572213 |
| C72  | 1 | 0.1055  | 0.0621  | 0.1109  | Biso | 1.00 | C  | -0.110648 |
| H32  | 1 | 0.0534  | 0.0438  | 0.0776  | Biso | 1.00 | H  | 0.13921   |
| C73  | 1 | 0.0995  | 0.0817  | 0.1836  | Biso | 1.00 | C  | -0.021001 |
| O45  | 1 | 0.1372  | 0.0158  | 0.9744  | Biso | 1.00 | O  | -0.497651 |
| C74  | 1 | 0.5103  | 0.2623  | 0.1811  | Biso | 1.00 | C  | 0.575449  |
| C75  | 1 | 0.5208  | 0.4141  | 0.09    | Biso | 1.00 | C  | -0.104692 |
| H33  | 1 | 0.5219  | 0.4473  | 0.07    | Biso | 1.00 | H  | 0.13637   |
| C76  | 1 | 0.4824  | 0.3744  | 0.0377  | Biso | 1.00 | C  | -0.024159 |

|     |   |        |        |        |      |      |   |           |
|-----|---|--------|--------|--------|------|------|---|-----------|
| C77 | 1 | 0.5536 | 0.356  | 0.2039 | Biso | 1.00 | C | -0.108841 |
| H34 | 1 | 0.5767 | 0.3503 | 0.2589 | Biso | 1.00 | H | 0.142205  |
| C78 | 1 | 0.2642 | 0.0967 | 0.1385 | Biso | 1.00 | C | -0.127971 |
| H35 | 1 | 0.3195 | 0.1026 | 0.1227 | Biso | 1.00 | H | 0.11159   |
| C79 | 1 | 0.5139 | 0.3157 | 0.1511 | Biso | 1.00 | C | -0.018273 |
| C80 | 1 | 0.5578 | 0.4055 | 0.1719 | Biso | 1.00 | C | -0.027465 |
| C81 | 1 | 0.1782 | 0.1084 | 0.2334 | Biso | 1.00 | C | -0.1136   |
| H36 | 1 | 0.1742 | 0.1217 | 0.2818 | Biso | 1.00 | H | 0.136426  |
| C82 | 1 | 0.1885 | 0.0697 | 0.0881 | Biso | 1.00 | C | -0.012757 |
| C83 | 1 | 0.0103 | 0.0724 | 0.2088 | Biso | 1.00 | C | 0.607216  |
| C84 | 1 | 0.2613 | 0.1154 | 0.2122 | Biso | 1.00 | C | -0.012457 |
| O46 | 1 | 0.3395 | 0.1711 | 0.3195 | Biso | 1.00 | O | -0.42477  |
| C85 | 1 | 0.1971 | 0.0493 | 0.0094 | Biso | 1.00 | C | 0.568599  |
| C86 | 1 | 0.3476 | 0.1459 | 0.2654 | Biso | 1.00 | C | 0.598045  |
| N16 | 1 | 0.2679 | 0.4095 | 0.7469 | Biso | 1.00 | N | -0.376633 |
| N17 | 1 | 0.214  | 0.4607 | 0.6244 | Biso | 1.00 | N | -0.353323 |
| N18 | 1 | 0.1313 | 0.3614 | 0.7291 | Biso | 1.00 | N | -0.31679  |
| N19 | 1 | 0.9634 | 0.3739 | 0.5708 | Biso | 1.00 | N | -0.593304 |
| H37 | 1 | 0.9183 | 0.3808 | 0.5271 | Biso | 1.00 | H | 0.370278  |
| H38 | 1 | 0.9564 | 0.3486 | 0.6006 | Biso | 1.00 | H | 0.35782   |
| C87 | 1 | 0.1201 | 0.3943 | 0.6641 | Biso | 1.00 | C | -0.037453 |
| C88 | 1 | 0.2038 | 0.4241 | 0.6754 | Biso | 1.00 | C | 0.307014  |
| N20 | 1 | 0.0509 | 0.4409 | 0.5436 | Biso | 1.00 | N | -0.37774  |
| C89 | 1 | 0.1331 | 0.4668 | 0.5611 | Biso | 1.00 | C | 0.243789  |
| H39 | 1 | 0.1361 | 0.4927 | 0.5251 | Biso | 1.00 | H | 0.07908   |
| C90 | 1 | 0.2202 | 0.3728 | 0.7763 | Biso | 1.00 | C | 0.184449  |
| H40 | 1 | 0.2476 | 0.3569 | 0.8257 | Biso | 1.00 | H | 0.101524  |
| C91 | 1 | 0.0427 | 0.4018 | 0.5919 | Biso | 1.00 | C | 0.433011  |
| C92 | 1 | 0.5995 | 0.4498 | 0.227  | Biso | 1.00 | C | 0.612074  |
| O47 | 1 | 0.6177 | 0.4434 | 0.3011 | Biso | 1.00 | O | -0.527272 |
| O48 | 1 | 0.6158 | 0.49   | 0.1951 | Biso | 1.00 | O | -0.558578 |

data\_IVILEG\_clean

\_cell\_length\_a 32.1446  
\_cell\_length\_b 32.1446  
\_cell\_length\_c 10.9808  
\_cell\_angle\_alpha 90  
\_cell\_angle\_beta 90  
\_cell\_angle\_gamma 90

\_symmetry\_space\_group\_name\_H-M P 1  
\_symmetry\_int\_tables\_number 1

loop\_

\_symmetry\_equiv\_pos\_as\_xyz  
'x,y,z'

loop\_

\_atom\_site\_label  
\_atom\_site\_occupancy  
\_atom\_site\_fract\_x  
\_atom\_site\_fract\_y  
\_atom\_site\_fract\_z  
\_atom\_site\_thermal\_displace\_type  
\_atom\_site\_B\_iso\_or\_equiv  
\_atom\_site\_type\_symbol  
\_atom\_site\_charge

|     |   |         |         |         |      |   |    |        |
|-----|---|---------|---------|---------|------|---|----|--------|
| Zn1 | 1 | 0.28384 | 0.71609 | 0.60755 | Biso | 1 | Zn | 0.766  |
| N1  | 1 | 0.27538 | 0.85586 | 0.8801  | Biso | 1 | N  | -0.265 |
| O1  | 1 | 0.4185  | 0.79995 | 0.0881  | Biso | 1 | O  | -0.567 |
| N2  | 1 | 0.25632 | 0.81067 | 0.7214  | Biso | 1 | N  | -0.327 |
| N3  | 1 | 0.34388 | 0.8437  | 0.0176  | Biso | 1 | N  | -0.704 |
| H1  | 1 | 0.3275  | 0.8647  | 0.0232  | Biso | 1 | H  | 0.345  |
| H2  | 1 | 0.365   | 0.8417  | 0.0651  | Biso | 1 | H  | 0.361  |
| O2  | 1 | 0.65682 | 0.1572  | 0.6791  | Biso | 1 | O  | -0.568 |
| C1  | 1 | 0.2452  | 0.8479  | 0.7826  | Biso | 1 | C  | 0.145  |
| H3  | 1 | 0.2225  | 0.8646  | 0.7639  | Biso | 1 | H  | 0.116  |
| O3  | 1 | 0.6812  | 0.1816  | 0.5045  | Biso | 1 | O  | -0.573 |
| C2  | 1 | 0.6588  | 0.1556  | 0.5675  | Biso | 1 | C  | 0.580  |
| C3  | 1 | 0.33529 | 0.80943 | 0.9221  | Biso | 1 | C  | 0.374  |
| C4  | 1 | 0.29962 | 0.82003 | 0.8576  | Biso | 1 | C  | -0.047 |
| C5  | 1 | 0.28648 | 0.79541 | 0.7609  | Biso | 1 | C  | 0.344  |
| N4  | 1 | 0.30901 | 0.76018 | 0.7287  | Biso | 1 | N  | -0.349 |
| C6  | 1 | 0.34468 | 0.74957 | 0.7932  | Biso | 1 | C  | 0.244  |
| H4  | 1 | 0.3598  | 0.726   | 0.7716  | Biso | 1 | H  | 0.123  |
| N5  | 1 | 0.35782 | 0.7742  | 0.8898  | Biso | 1 | N  | -0.337 |
| C7  | 1 | 0.5996  | 0.1111  | 0.5401  | Biso | 1 | C  | -0.112 |
| H5  | 1 | 0.5888  | 0.1241  | 0.6089  | Biso | 1 | H  | 0.115  |
| C8  | 1 | 0.5759  | 0.082   | 0.4773  | Biso | 1 | C  | -0.161 |
| H6  | 1 | 0.5492  | 0.0755  | 0.5041  | Biso | 1 | H  | 0.114  |
| C9  | 1 | 0.592   | 0.0627  | 0.3744  | Biso | 1 | C  | 0.100  |
| C10 | 1 | 0.6318  | 0.0724  | 0.3343  | Biso | 1 | C  | -0.158 |

|     |   |         |         |         |      |   |    |        |  |  |
|-----|---|---------|---------|---------|------|---|----|--------|--|--|
| H7  | 1 | 0.6426  | 0.0595  | 0.2654  | Biso | 1 | H  | 0.116  |  |  |
| C11 | 1 | 0.6555  | 0.1015  | 0.397   | Biso | 1 | C  | -0.115 |  |  |
| H8  | 1 | 0.6822  | 0.1081  | 0.3702  | Biso | 1 | H  | 0.107  |  |  |
| C12 | 1 | 0.6394  | 0.1209  | 0.5     | Biso | 1 | C  | -0.036 |  |  |
| O4  | 1 | 0.4587  | 0.7959  | 0.9286  | Biso | 1 | O  | -0.540 |  |  |
| C13 | 1 | 0.45    | 0.8142  | 0.029   | Biso | 1 | C  | 0.551  |  |  |
| C14 | 1 | 0.4741  | 0.8472  | 0.082   | Biso | 1 | C  | -0.024 |  |  |
| C15 | 1 | 0.4641  | 0.8633  | 0.1957  | Biso | 1 | C  | -0.108 |  |  |
| H9  | 1 | 0.443   | 0.8513  | 0.2416  | Biso | 1 | H  | 0.119  |  |  |
| C16 | 1 | 0.4856  | 0.8975  | 0.241   | Biso | 1 | C  | -0.162 |  |  |
| H10 | 1 | 0.4789  | 0.9083  | 0.317   | Biso | 1 | H  | 0.120  |  |  |
| C17 | 1 | 0.5172  | 0.9155  | 0.1724  | Biso | 1 | C  | 0.110  |  |  |
| C18 | 1 | 0.5272  | 0.8994  | 0.0587  | Biso | 1 | C  | -0.160 |  |  |
| H11 | 1 | 0.5483  | 0.9115  | 0.0128  | Biso | 1 | H  | 0.125  |  |  |
| C19 | 1 | 0.5057  | 0.8653  | 0.0135  | Biso | 1 | C  | -0.094 |  |  |
| H12 | 1 | 0.5124  | 0.8545  | 0.9374  | Biso | 1 | H  | 0.128  |  |  |
| C20 | 1 | 0.5684  | 0.0292  | 0.3142  | Biso | 1 | C  | 0.003  |  |  |
| C21 | 1 | 0.5413  | 0.951   | 0.214   | Biso | 1 | C  | -0.017 |  |  |
| C22 | 1 | 0.5496  | 0.9618  | 0.334   | Biso | 1 | C  | 0.192  |  |  |
| C23 | 1 | 0.5625  | 0.0288  | 0.187   | Biso | 1 | C  | 0.110  |  |  |
| C24 | 1 | 0.5607  | 0.9976  | 0.4     | Biso | 1 | C  | -0.249 |  |  |
| H13 | 1 | 0.5626  | 0       | 0.4844  | Biso | 1 | H  | 0.157  |  |  |
| C25 | 1 | 0.5428  | 0.9909  | 0.157   | Biso | 1 | C  | -0.210 |  |  |
| H14 | 1 | 0.5278  | 0.9922  | 0.0844  | Biso | 1 | H  | 0.090  |  |  |
| C26 | 1 | 0.5736  | 0.0638  | 0.099   | Biso | 1 | C  | -0.514 |  |  |
| H15 | 1 | 0.6034  | 0.0642  | 0.0925  | Biso | 1 | H  | 0.161  |  |  |
| H16 | 1 | 0.5618  | 0.0566  | 0.0214  | Biso | 1 | H  | 0.168  |  |  |
| H17 | 1 | 0.5638  | 0.0908  | 0.1229  | Biso | 1 | H  | 0.175  |  |  |
| C27 | 1 | 0.5531  | 0.9262  | 0.402   | Biso | 1 | C  | -0.577 |  |  |
| H18 | 1 | 0.5363  | 0.9318  | 0.4726  | Biso | 1 | H  | 0.160  |  |  |
| H19 | 1 | 0.5812  | 0.9209  | 0.4272  | Biso | 1 | H  | 0.181  |  |  |
| H20 | 1 | 0.5424  | 0.9023  | 0.3603  | Biso | 1 | H  | 0.158  |  |  |
| Zn2 | 1 | 0.21616 | 0.78391 | 0.60755 | Biso | 1 | Zn | 0.766  |  |  |
| N6  | 1 | 0.22462 | 0.64414 | 0.8801  | Biso | 1 | N  | -0.265 |  |  |
| O5  | 1 | 0.0815  | 0.70005 | 0.0881  | Biso | 1 | O  | -0.571 |  |  |
| N7  | 1 | 0.24368 | 0.68933 | 0.7214  | Biso | 1 | N  | -0.327 |  |  |
| N8  | 1 | 0.15612 | 0.6563  | 0.0176  | Biso | 1 | N  | -0.704 |  |  |
| H21 | 1 | 0.1725  | 0.6353  | 0.0232  | Biso | 1 | H  | 0.345  |  |  |
| H22 | 1 | 0.135   | 0.6583  | 0.0651  | Biso | 1 | H  | 0.361  |  |  |
| O6  | 1 | 0.84318 | 0.3428  | 0.6791  | Biso | 1 | O  | -0.568 |  |  |
| C28 | 1 | 0.2548  | 0.6521  | 0.7826  | Biso | 1 | C  | 0.145  |  |  |
| H23 | 1 | 0.2775  | 0.6354  | 0.7639  | Biso | 1 | H  | 0.116  |  |  |
| O7  | 1 | 0.8188  | 0.3184  | 0.5045  | Biso | 1 | O  | -0.573 |  |  |
| C29 | 1 | 0.8412  | 0.3444  | 0.5675  | Biso | 1 | C  | 0.580  |  |  |
| C30 | 1 | 0.16471 | 0.69057 | 0.9221  | Biso | 1 | C  | 0.374  |  |  |
| C31 | 1 | 0.20038 | 0.67997 | 0.8576  | Biso | 1 | C  | -0.047 |  |  |
| C32 | 1 | 0.21352 | 0.70459 | 0.7609  | Biso | 1 | C  | 0.344  |  |  |
| N9  | 1 | 0.19099 | 0.73982 | 0.7287  | Biso | 1 | N  | -0.349 |  |  |
| C33 | 1 | 0.15532 | 0.75043 | 0.7932  | Biso | 1 | C  | 0.244  |  |  |
| H24 | 1 | 0.1402  | 0.774   | 0.7716  | Biso | 1 | H  | 0.123  |  |  |
| N10 | 1 | 0.14218 | 0.7258  | 0.8898  | Biso | 1 | N  | -0.336 |  |  |
| C34 | 1 | 0.9004  | 0.3889  | 0.5401  | Biso | 1 | C  | -0.112 |  |  |

|     |   |         |         |         |      |   |    |        |  |  |
|-----|---|---------|---------|---------|------|---|----|--------|--|--|
| H25 | 1 | 0.9112  | 0.3759  | 0.6089  | Biso | 1 | H  | 0.115  |  |  |
| C35 | 1 | 0.9241  | 0.418   | 0.4773  | Biso | 1 | C  | -0.161 |  |  |
| H26 | 1 | 0.9508  | 0.4245  | 0.5041  | Biso | 1 | H  | 0.114  |  |  |
| C36 | 1 | 0.908   | 0.4373  | 0.3744  | Biso | 1 | C  | 0.100  |  |  |
| C37 | 1 | 0.8682  | 0.4276  | 0.3343  | Biso | 1 | C  | -0.158 |  |  |
| H27 | 1 | 0.8574  | 0.4405  | 0.2654  | Biso | 1 | H  | 0.116  |  |  |
| C38 | 1 | 0.8445  | 0.3985  | 0.397   | Biso | 1 | C  | -0.115 |  |  |
| H28 | 1 | 0.8178  | 0.3919  | 0.3702  | Biso | 1 | H  | 0.107  |  |  |
| C39 | 1 | 0.8606  | 0.3791  | 0.5     | Biso | 1 | C  | -0.036 |  |  |
| O8  | 1 | 0.0413  | 0.7041  | 0.9286  | Biso | 1 | O  | -0.537 |  |  |
| C40 | 1 | 0.05    | 0.6858  | 0.029   | Biso | 1 | C  | 0.552  |  |  |
| C41 | 1 | 0.0259  | 0.6528  | 0.082   | Biso | 1 | C  | -0.023 |  |  |
| C42 | 1 | 0.0359  | 0.6367  | 0.1957  | Biso | 1 | C  | -0.107 |  |  |
| H29 | 1 | 0.057   | 0.6487  | 0.2416  | Biso | 1 | H  | 0.119  |  |  |
| C43 | 1 | 0.0144  | 0.6025  | 0.241   | Biso | 1 | C  | -0.162 |  |  |
| H30 | 1 | 0.0211  | 0.5917  | 0.317   | Biso | 1 | H  | 0.120  |  |  |
| C44 | 1 | 0.9828  | 0.5845  | 0.1724  | Biso | 1 | C  | 0.110  |  |  |
| C45 | 1 | 0.9728  | 0.6006  | 0.0587  | Biso | 1 | C  | -0.160 |  |  |
| H31 | 1 | 0.9517  | 0.5885  | 0.0128  | Biso | 1 | H  | 0.125  |  |  |
| C46 | 1 | 0.9943  | 0.6347  | 0.0135  | Biso | 1 | C  | -0.094 |  |  |
| H32 | 1 | 0.9876  | 0.6455  | 0.9374  | Biso | 1 | H  | 0.128  |  |  |
| C47 | 1 | 0.9316  | 0.4708  | 0.3142  | Biso | 1 | C  | 0.003  |  |  |
| C48 | 1 | 0.9587  | 0.549   | 0.214   | Biso | 1 | C  | -0.017 |  |  |
| C49 | 1 | 0.9504  | 0.5382  | 0.334   | Biso | 1 | C  | 0.193  |  |  |
| C50 | 1 | 0.9375  | 0.4712  | 0.187   | Biso | 1 | C  | 0.110  |  |  |
| C51 | 1 | 0.9393  | 0.5024  | 0.4     | Biso | 1 | C  | -0.249 |  |  |
| H33 | 1 | 0.9374  | 0.5     | 0.4844  | Biso | 1 | H  | 0.157  |  |  |
| C52 | 1 | 0.9572  | 0.5091  | 0.157   | Biso | 1 | C  | -0.210 |  |  |
| H34 | 1 | 0.9722  | 0.5078  | 0.0844  | Biso | 1 | H  | 0.090  |  |  |
| C53 | 1 | 0.9264  | 0.4362  | 0.099   | Biso | 1 | C  | -0.514 |  |  |
| H35 | 1 | 0.8966  | 0.4358  | 0.0925  | Biso | 1 | H  | 0.161  |  |  |
| H36 | 1 | 0.9382  | 0.4434  | 0.0214  | Biso | 1 | H  | 0.168  |  |  |
| H37 | 1 | 0.9362  | 0.4092  | 0.1229  | Biso | 1 | H  | 0.175  |  |  |
| C54 | 1 | 0.9469  | 0.5738  | 0.402   | Biso | 1 | C  | -0.577 |  |  |
| H38 | 1 | 0.9637  | 0.5682  | 0.4726  | Biso | 1 | H  | 0.160  |  |  |
| H39 | 1 | 0.9188  | 0.5791  | 0.4272  | Biso | 1 | H  | 0.181  |  |  |
| H40 | 1 | 0.9576  | 0.5977  | 0.3603  | Biso | 1 | H  | 0.159  |  |  |
| Zn3 | 1 | 0.21616 | 0.71609 | 0.39245 | Biso | 1 | Zn | 0.766  |  |  |
| N11 | 1 | 0.22462 | 0.85586 | 0.1199  | Biso | 1 | N  | -0.265 |  |  |
| O9  | 1 | 0.0815  | 0.79995 | 0.9119  | Biso | 1 | O  | -0.574 |  |  |
| N12 | 1 | 0.24368 | 0.81067 | 0.2786  | Biso | 1 | N  | -0.327 |  |  |
| N13 | 1 | 0.15612 | 0.8437  | 0.9824  | Biso | 1 | N  | -0.704 |  |  |
| H41 | 1 | 0.1725  | 0.8647  | 0.9768  | Biso | 1 | H  | 0.345  |  |  |
| H42 | 1 | 0.135   | 0.8417  | 0.9349  | Biso | 1 | H  | 0.362  |  |  |
| O10 | 1 | 0.84318 | 0.1572  | 0.3209  | Biso | 1 | O  | -0.568 |  |  |
| C55 | 1 | 0.2548  | 0.8479  | 0.2174  | Biso | 1 | C  | 0.145  |  |  |
| H43 | 1 | 0.2775  | 0.8646  | 0.2361  | Biso | 1 | H  | 0.116  |  |  |
| O11 | 1 | 0.8188  | 0.1816  | 0.4955  | Biso | 1 | O  | -0.574 |  |  |
| C56 | 1 | 0.8412  | 0.1556  | 0.4325  | Biso | 1 | C  | 0.580  |  |  |
| C57 | 1 | 0.16471 | 0.80943 | 0.0779  | Biso | 1 | C  | 0.374  |  |  |
| C58 | 1 | 0.20038 | 0.82003 | 0.1424  | Biso | 1 | C  | -0.047 |  |  |
| C59 | 1 | 0.21352 | 0.79541 | 0.2391  | Biso | 1 | C  | 0.344  |  |  |

|     |   |         |         |         |      |   |    |        |
|-----|---|---------|---------|---------|------|---|----|--------|
| N14 | 1 | 0.19099 | 0.76018 | 0.2713  | Biso | 1 | N  | -0.349 |
| C60 | 1 | 0.15532 | 0.74957 | 0.2068  | Biso | 1 | C  | 0.244  |
| H44 | 1 | 0.1402  | 0.726   | 0.2284  | Biso | 1 | H  | 0.123  |
| N15 | 1 | 0.14218 | 0.7742  | 0.1102  | Biso | 1 | N  | -0.336 |
| C61 | 1 | 0.9004  | 0.1111  | 0.4599  | Biso | 1 | C  | -0.112 |
| H45 | 1 | 0.9112  | 0.1241  | 0.3911  | Biso | 1 | H  | 0.115  |
| C62 | 1 | 0.9241  | 0.082   | 0.5227  | Biso | 1 | C  | -0.161 |
| H46 | 1 | 0.9508  | 0.0755  | 0.4959  | Biso | 1 | H  | 0.115  |
| C63 | 1 | 0.908   | 0.0627  | 0.6256  | Biso | 1 | C  | 0.100  |
| C64 | 1 | 0.8682  | 0.0724  | 0.6657  | Biso | 1 | C  | -0.158 |
| H47 | 1 | 0.8574  | 0.0595  | 0.7346  | Biso | 1 | H  | 0.116  |
| C65 | 1 | 0.8445  | 0.1015  | 0.603   | Biso | 1 | C  | -0.115 |
| H48 | 1 | 0.8178  | 0.1081  | 0.6298  | Biso | 1 | H  | 0.107  |
| C66 | 1 | 0.8606  | 0.1209  | 0.5     | Biso | 1 | C  | -0.036 |
| O12 | 1 | 0.0413  | 0.7959  | 0.0714  | Biso | 1 | O  | -0.542 |
| C67 | 1 | 0.05    | 0.8142  | 0.971   | Biso | 1 | C  | 0.552  |
| C68 | 1 | 0.0259  | 0.8472  | 0.918   | Biso | 1 | C  | -0.023 |
| C69 | 1 | 0.0359  | 0.8633  | 0.8043  | Biso | 1 | C  | -0.108 |
| H49 | 1 | 0.057   | 0.8513  | 0.7584  | Biso | 1 | H  | 0.119  |
| C70 | 1 | 0.0144  | 0.8975  | 0.759   | Biso | 1 | C  | -0.162 |
| H50 | 1 | 0.0211  | 0.9083  | 0.683   | Biso | 1 | H  | 0.120  |
| C71 | 1 | 0.9828  | 0.9155  | 0.8276  | Biso | 1 | C  | 0.109  |
| C72 | 1 | 0.9728  | 0.8994  | 0.9413  | Biso | 1 | C  | -0.161 |
| H51 | 1 | 0.9517  | 0.9115  | 0.9872  | Biso | 1 | H  | 0.124  |
| C73 | 1 | 0.9943  | 0.8653  | 0.9865  | Biso | 1 | C  | -0.095 |
| H52 | 1 | 0.9876  | 0.8545  | 0.0626  | Biso | 1 | H  | 0.128  |
| C74 | 1 | 0.9316  | 0.0292  | 0.6858  | Biso | 1 | C  | 0.003  |
| C75 | 1 | 0.9587  | 0.951   | 0.786   | Biso | 1 | C  | -0.017 |
| C76 | 1 | 0.9504  | 0.9618  | 0.666   | Biso | 1 | C  | 0.192  |
| C77 | 1 | 0.9375  | 0.0288  | 0.813   | Biso | 1 | C  | 0.110  |
| C78 | 1 | 0.9393  | 0.9976  | 0.6     | Biso | 1 | C  | -0.249 |
| H53 | 1 | 0.9374  | 0       | 0.5156  | Biso | 1 | H  | 0.157  |
| C79 | 1 | 0.9572  | 0.9909  | 0.843   | Biso | 1 | C  | -0.210 |
| H54 | 1 | 0.9722  | 0.9922  | 0.9156  | Biso | 1 | H  | 0.090  |
| C80 | 1 | 0.9264  | 0.0638  | 0.901   | Biso | 1 | C  | -0.515 |
| H55 | 1 | 0.8966  | 0.0642  | 0.9075  | Biso | 1 | H  | 0.161  |
| H56 | 1 | 0.9382  | 0.0566  | 0.9786  | Biso | 1 | H  | 0.168  |
| H57 | 1 | 0.9362  | 0.0908  | 0.8771  | Biso | 1 | H  | 0.175  |
| C81 | 1 | 0.9469  | 0.9262  | 0.598   | Biso | 1 | C  | -0.577 |
| H58 | 1 | 0.9637  | 0.9318  | 0.5274  | Biso | 1 | H  | 0.160  |
| H59 | 1 | 0.9188  | 0.9209  | 0.5728  | Biso | 1 | H  | 0.181  |
| H60 | 1 | 0.9576  | 0.9023  | 0.6397  | Biso | 1 | H  | 0.159  |
| Zn4 | 1 | 0.28384 | 0.78391 | 0.39245 | Biso | 1 | Zn | 0.766  |
| N16 | 1 | 0.27538 | 0.64414 | 0.1199  | Biso | 1 | N  | -0.265 |
| O13 | 1 | 0.4185  | 0.70005 | 0.9119  | Biso | 1 | O  | -0.567 |
| N17 | 1 | 0.25632 | 0.68933 | 0.2786  | Biso | 1 | N  | -0.327 |
| N18 | 1 | 0.34388 | 0.6563  | 0.9824  | Biso | 1 | N  | -0.704 |
| H61 | 1 | 0.3275  | 0.6353  | 0.9768  | Biso | 1 | H  | 0.345  |
| H62 | 1 | 0.365   | 0.6583  | 0.9349  | Biso | 1 | H  | 0.361  |
| O14 | 1 | 0.65682 | 0.3428  | 0.3209  | Biso | 1 | O  | -0.568 |
| C82 | 1 | 0.2452  | 0.6521  | 0.2174  | Biso | 1 | C  | 0.146  |
| H63 | 1 | 0.2225  | 0.6354  | 0.2361  | Biso | 1 | H  | 0.116  |

|      |   |         |         |         |        |         |      |        |        |        |
|------|---|---------|---------|---------|--------|---------|------|--------|--------|--------|
| O15  | 1 | 0.6812  | 0.3184  | 0.4955  | Biso   | 1       | O    | -0.573 |        |        |
| C83  | 1 | 0.6588  | 0.3444  | 0.4325  | Biso   | 1       | C    | 0.580  |        |        |
| C84  | 1 | 0.33529 |         | 0.69057 |        | 0.0779  | Biso | 1      | C      | 0.374  |
| C85  | 1 | 0.29962 |         | 0.67997 |        | 0.1424  | Biso | 1      | C      | -0.047 |
| C86  | 1 | 0.28648 |         | 0.70459 |        | 0.2391  | Biso | 1      | C      | 0.345  |
| N19  | 1 | 0.30901 |         | 0.73982 |        | 0.2713  | Biso | 1      | N      | -0.349 |
| C87  | 1 | 0.34468 |         | 0.75043 |        | 0.2068  | Biso | 1      | C      | 0.244  |
| H64  | 1 | 0.3598  | 0.774   | 0.2284  | Biso   | 1       | H    | 0.123  |        |        |
| N20  | 1 | 0.35782 |         | 0.7258  | 0.1102 | Biso    | 1    | N      | -0.337 |        |
| C88  | 1 | 0.5996  | 0.3889  | 0.4599  | Biso   | 1       | C    | -0.112 |        |        |
| H65  | 1 | 0.5888  | 0.3759  | 0.3911  | Biso   | 1       | H    | 0.115  |        |        |
| C89  | 1 | 0.5759  | 0.418   | 0.5227  | Biso   | 1       | C    | -0.161 |        |        |
| H66  | 1 | 0.5492  | 0.4245  | 0.4959  | Biso   | 1       | H    | 0.115  |        |        |
| C90  | 1 | 0.592   | 0.4373  | 0.6256  | Biso   | 1       | C    | 0.100  |        |        |
| C91  | 1 | 0.6318  | 0.4276  | 0.6657  | Biso   | 1       | C    | -0.158 |        |        |
| H67  | 1 | 0.6426  | 0.4405  | 0.7346  | Biso   | 1       | H    | 0.116  |        |        |
| C92  | 1 | 0.6555  | 0.3985  | 0.603   | Biso   | 1       | C    | -0.115 |        |        |
| H68  | 1 | 0.6822  | 0.3919  | 0.6298  | Biso   | 1       | H    | 0.107  |        |        |
| C93  | 1 | 0.6394  | 0.3791  | 0.5     | Biso   | 1       | C    | -0.036 |        |        |
| O16  | 1 | 0.4587  | 0.7041  | 0.0714  | Biso   | 1       | O    | -0.541 |        |        |
| C94  | 1 | 0.45    | 0.6858  | 0.971   | Biso   | 1       | C    | 0.552  |        |        |
| C95  | 1 | 0.4741  | 0.6528  | 0.918   | Biso   | 1       | C    | -0.024 |        |        |
| C96  | 1 | 0.4641  | 0.6367  | 0.8043  | Biso   | 1       | C    | -0.108 |        |        |
| H69  | 1 | 0.443   | 0.6487  | 0.7584  | Biso   | 1       | H    | 0.119  |        |        |
| C97  | 1 | 0.4856  | 0.6025  | 0.759   | Biso   | 1       | C    | -0.162 |        |        |
| H70  | 1 | 0.4789  | 0.5917  | 0.683   | Biso   | 1       | H    | 0.120  |        |        |
| C98  | 1 | 0.5172  | 0.5845  | 0.8276  | Biso   | 1       | C    | 0.110  |        |        |
| C99  | 1 | 0.5272  | 0.6006  | 0.9413  | Biso   | 1       | C    | -0.160 |        |        |
| H71  | 1 | 0.5483  | 0.5885  | 0.9872  | Biso   | 1       | H    | 0.125  |        |        |
| C100 | 1 | 0.5057  | 0.6347  | 0.9865  | Biso   | 1       | C    | -0.094 |        |        |
| H72  | 1 | 0.5124  | 0.6455  | 0.0626  | Biso   | 1       | H    | 0.128  |        |        |
| C101 | 1 | 0.5684  | 0.4708  | 0.6858  | Biso   | 1       | C    | 0.003  |        |        |
| C102 | 1 | 0.5413  | 0.549   | 0.786   | Biso   | 1       | C    | -0.017 |        |        |
| C103 | 1 | 0.5496  | 0.5382  | 0.666   | Biso   | 1       | C    | 0.192  |        |        |
| C104 | 1 | 0.5625  | 0.4712  | 0.813   | Biso   | 1       | C    | 0.110  |        |        |
| C105 | 1 | 0.5607  | 0.5024  | 0.6     | Biso   | 1       | C    | -0.249 |        |        |
| H73  | 1 | 0.5626  | 0.5     | 0.5156  | Biso   | 1       | H    | 0.157  |        |        |
| C106 | 1 | 0.5428  | 0.5091  | 0.843   | Biso   | 1       | C    | -0.210 |        |        |
| H74  | 1 | 0.5278  | 0.5078  | 0.9156  | Biso   | 1       | H    | 0.090  |        |        |
| C107 | 1 | 0.5736  | 0.4362  | 0.901   | Biso   | 1       | C    | -0.515 |        |        |
| H75  | 1 | 0.6034  | 0.4358  | 0.9075  | Biso   | 1       | H    | 0.161  |        |        |
| H76  | 1 | 0.5618  | 0.4434  | 0.9786  | Biso   | 1       | H    | 0.168  |        |        |
| H77  | 1 | 0.5638  | 0.4092  | 0.8771  | Biso   | 1       | H    | 0.175  |        |        |
| C108 | 1 | 0.5531  | 0.5738  | 0.598   | Biso   | 1       | C    | -0.577 |        |        |
| H78  | 1 | 0.5363  | 0.5682  | 0.5274  | Biso   | 1       | H    | 0.160  |        |        |
| H79  | 1 | 0.5812  | 0.5791  | 0.5728  | Biso   | 1       | H    | 0.181  |        |        |
| H80  | 1 | 0.5424  | 0.5977  | 0.6397  | Biso   | 1       | H    | 0.158  |        |        |
| Zn5  | 1 | 0.71616 |         | 0.28391 |        | 0.39245 | Biso | 1      | Zn     | 0.766  |
| N21  | 1 | 0.72462 |         | 0.14414 |        | 0.1199  | Biso | 1      | N      | -0.264 |
| O17  | 1 | 0.5815  | 0.20005 |         | 0.9119 | Biso    | 1    | O      | -0.567 |        |
| N22  | 1 | 0.74368 |         | 0.18933 |        | 0.2786  | Biso | 1      | N      | -0.327 |
| N23  | 1 | 0.65612 |         | 0.1563  | 0.9824 | Biso    | 1    | N      | -0.704 |        |

|      |   |         |        |         |        |        |      |        |        |        |
|------|---|---------|--------|---------|--------|--------|------|--------|--------|--------|
| H81  | 1 | 0.6725  | 0.1353 | 0.9768  | Biso   | 1      | H    | 0.345  |        |        |
| H82  | 1 | 0.635   | 0.1583 | 0.9349  | Biso   | 1      | H    | 0.361  |        |        |
| O18  | 1 | 0.34318 |        | 0.8428  | 0.3209 | Biso   | 1    | O      | -0.568 |        |
| C109 | 1 | 0.7548  | 0.1521 | 0.2174  | Biso   | 1      | C    | 0.146  |        |        |
| H83  | 1 | 0.7775  | 0.1354 | 0.2361  | Biso   | 1      | H    | 0.116  |        |        |
| O19  | 1 | 0.3188  | 0.8184 | 0.4955  | Biso   | 1      | O    | -0.574 |        |        |
| C110 | 1 | 0.3412  | 0.8444 | 0.4325  | Biso   | 1      | C    | 0.580  |        |        |
| C111 | 1 | 0.66471 |        | 0.19057 |        | 0.0779 | Biso | 1      | C      | 0.374  |
| C112 | 1 | 0.70038 |        | 0.17997 |        | 0.1424 | Biso | 1      | C      | -0.047 |
| C113 | 1 | 0.71352 |        | 0.20459 |        | 0.2391 | Biso | 1      | C      | 0.345  |
| N24  | 1 | 0.69099 |        | 0.23982 |        | 0.2713 | Biso | 1      | N      | -0.349 |
| C114 | 1 | 0.65532 |        | 0.25043 |        | 0.2068 | Biso | 1      | C      | 0.244  |
| H84  | 1 | 0.6402  | 0.274  | 0.2284  | Biso   | 1      | H    | 0.123  |        |        |
| N25  | 1 | 0.64218 |        | 0.2258  | 0.1102 | Biso   | 1    | N      | -0.337 |        |
| C115 | 1 | 0.4004  | 0.8889 | 0.4599  | Biso   | 1      | C    | -0.112 |        |        |
| H85  | 1 | 0.4112  | 0.8759 | 0.3911  | Biso   | 1      | H    | 0.115  |        |        |
| C116 | 1 | 0.4241  | 0.918  | 0.5227  | Biso   | 1      | C    | -0.161 |        |        |
| H86  | 1 | 0.4508  | 0.9245 | 0.4959  | Biso   | 1      | H    | 0.114  |        |        |
| C117 | 1 | 0.408   | 0.9373 | 0.6256  | Biso   | 1      | C    | 0.100  |        |        |
| C118 | 1 | 0.3682  | 0.9276 | 0.6657  | Biso   | 1      | C    | -0.158 |        |        |
| H87  | 1 | 0.3574  | 0.9405 | 0.7346  | Biso   | 1      | H    | 0.116  |        |        |
| C119 | 1 | 0.3445  | 0.8985 | 0.603   | Biso   | 1      | C    | -0.115 |        |        |
| H88  | 1 | 0.3178  | 0.8919 | 0.6298  | Biso   | 1      | H    | 0.107  |        |        |
| C120 | 1 | 0.3606  | 0.8791 | 0.5     | Biso   | 1      | C    | -0.036 |        |        |
| O20  | 1 | 0.5413  | 0.2041 | 0.0714  | Biso   | 1      | O    | -0.540 |        |        |
| C121 | 1 | 0.55    | 0.1858 | 0.971   | Biso   | 1      | C    | 0.552  |        |        |
| C122 | 1 | 0.5259  | 0.1528 | 0.918   | Biso   | 1      | C    | -0.024 |        |        |
| C123 | 1 | 0.5359  | 0.1367 | 0.8043  | Biso   | 1      | C    | -0.108 |        |        |
| H89  | 1 | 0.557   | 0.1487 | 0.7584  | Biso   | 1      | H    | 0.119  |        |        |
| C124 | 1 | 0.5144  | 0.1025 | 0.759   | Biso   | 1      | C    | -0.162 |        |        |
| H90  | 1 | 0.5211  | 0.0917 | 0.683   | Biso   | 1      | H    | 0.120  |        |        |
| C125 | 1 | 0.4828  | 0.0845 | 0.8276  | Biso   | 1      | C    | 0.110  |        |        |
| C126 | 1 | 0.4728  | 0.1006 | 0.9413  | Biso   | 1      | C    | -0.160 |        |        |
| H91  | 1 | 0.4517  | 0.0885 | 0.9872  | Biso   | 1      | H    | 0.125  |        |        |
| C127 | 1 | 0.4943  | 0.1347 | 0.9865  | Biso   | 1      | C    | -0.094 |        |        |
| H92  | 1 | 0.4876  | 0.1455 | 0.0626  | Biso   | 1      | H    | 0.128  |        |        |
| C128 | 1 | 0.4316  | 0.9708 | 0.6858  | Biso   | 1      | C    | 0.003  |        |        |
| C129 | 1 | 0.4587  | 0.049  | 0.786   | Biso   | 1      | C    | -0.017 |        |        |
| C130 | 1 | 0.4504  | 0.0382 | 0.666   | Biso   | 1      | C    | 0.192  |        |        |
| C131 | 1 | 0.4375  | 0.9712 | 0.813   | Biso   | 1      | C    | 0.110  |        |        |
| C132 | 1 | 0.4393  | 0.0024 | 0.6     | Biso   | 1      | C    | -0.249 |        |        |
| H93  | 1 | 0.4374  | 0      | 0.5156  | Biso   | 1      | H    | 0.157  |        |        |
| C133 | 1 | 0.4572  | 0.0091 | 0.843   | Biso   | 1      | C    | -0.210 |        |        |
| H94  | 1 | 0.4722  | 0.0078 | 0.9156  | Biso   | 1      | H    | 0.090  |        |        |
| C134 | 1 | 0.4264  | 0.9362 | 0.901   | Biso   | 1      | C    | -0.515 |        |        |
| H95  | 1 | 0.3966  | 0.9358 | 0.9075  | Biso   | 1      | H    | 0.161  |        |        |
| H96  | 1 | 0.4382  | 0.9434 | 0.9786  | Biso   | 1      | H    | 0.168  |        |        |
| H97  | 1 | 0.4362  | 0.9092 | 0.8771  | Biso   | 1      | H    | 0.175  |        |        |
| C135 | 1 | 0.4469  | 0.0738 | 0.598   | Biso   | 1      | C    | -0.577 |        |        |
| H98  | 1 | 0.4637  | 0.0682 | 0.5274  | Biso   | 1      | H    | 0.160  |        |        |
| H99  | 1 | 0.4188  | 0.0791 | 0.5728  | Biso   | 1      | H    | 0.181  |        |        |
| H100 | 1 | 0.4576  | 0.0977 | 0.6397  | Biso   | 1      | H    | 0.158  |        |        |

|      |   |         |         |         |      |   |    |        |
|------|---|---------|---------|---------|------|---|----|--------|
| Zn6  | 1 | 0.78384 | 0.21609 | 0.39245 | Biso | 1 | Zn | 0.766  |
| N26  | 1 | 0.77538 | 0.35586 | 0.1199  | Biso | 1 | N  | -0.265 |
| O21  | 1 | 0.9185  | 0.29995 | 0.9119  | Biso | 1 | O  | -0.568 |
| N27  | 1 | 0.75632 | 0.31067 | 0.2786  | Biso | 1 | N  | -0.327 |
| N28  | 1 | 0.84388 | 0.3437  | 0.9824  | Biso | 1 | N  | -0.704 |
| H101 | 1 | 0.8275  | 0.3647  | 0.9768  | Biso | 1 | H  | 0.345  |
| H102 | 1 | 0.865   | 0.3417  | 0.9349  | Biso | 1 | H  | 0.361  |
| O22  | 1 | 0.15682 | 0.6572  | 0.3209  | Biso | 1 | O  | -0.568 |
| C136 | 1 | 0.7452  | 0.3479  | 0.2174  | Biso | 1 | C  | 0.145  |
| H103 | 1 | 0.7225  | 0.3646  | 0.2361  | Biso | 1 | H  | 0.116  |
| O23  | 1 | 0.1812  | 0.6816  | 0.4955  | Biso | 1 | O  | -0.574 |
| C137 | 1 | 0.1588  | 0.6556  | 0.4325  | Biso | 1 | C  | 0.580  |
| C138 | 1 | 0.83529 | 0.30943 | 0.0779  | Biso | 1 | C  | 0.374  |
| C139 | 1 | 0.79962 | 0.32003 | 0.1424  | Biso | 1 | C  | -0.047 |
| C140 | 1 | 0.78648 | 0.29541 | 0.2391  | Biso | 1 | C  | 0.345  |
| N29  | 1 | 0.80901 | 0.26018 | 0.2713  | Biso | 1 | N  | -0.349 |
| C141 | 1 | 0.84468 | 0.24957 | 0.2068  | Biso | 1 | C  | 0.244  |
| H104 | 1 | 0.8598  | 0.226   | 0.2284  | Biso | 1 | H  | 0.123  |
| N30  | 1 | 0.85782 | 0.2742  | 0.1102  | Biso | 1 | N  | -0.336 |
| C142 | 1 | 0.0996  | 0.6111  | 0.4599  | Biso | 1 | C  | -0.112 |
| H105 | 1 | 0.0888  | 0.6241  | 0.3911  | Biso | 1 | H  | 0.115  |
| C143 | 1 | 0.0759  | 0.582   | 0.5227  | Biso | 1 | C  | -0.161 |
| H106 | 1 | 0.0492  | 0.5755  | 0.4959  | Biso | 1 | H  | 0.115  |
| C144 | 1 | 0.092   | 0.5627  | 0.6256  | Biso | 1 | C  | 0.100  |
| C145 | 1 | 0.1318  | 0.5724  | 0.6657  | Biso | 1 | C  | -0.158 |
| H107 | 1 | 0.1426  | 0.5595  | 0.7346  | Biso | 1 | H  | 0.116  |
| C146 | 1 | 0.1555  | 0.6015  | 0.603   | Biso | 1 | C  | -0.115 |
| H108 | 1 | 0.1822  | 0.6081  | 0.6298  | Biso | 1 | H  | 0.107  |
| C147 | 1 | 0.1394  | 0.6209  | 0.5     | Biso | 1 | C  | -0.036 |
| O24  | 1 | 0.9587  | 0.2959  | 0.0714  | Biso | 1 | O  | -0.541 |
| C148 | 1 | 0.95    | 0.3142  | 0.971   | Biso | 1 | C  | 0.552  |
| C149 | 1 | 0.9741  | 0.3472  | 0.918   | Biso | 1 | C  | -0.023 |
| C150 | 1 | 0.9641  | 0.3633  | 0.8043  | Biso | 1 | C  | -0.108 |
| H109 | 1 | 0.943   | 0.3513  | 0.7584  | Biso | 1 | H  | 0.119  |
| C151 | 1 | 0.9856  | 0.3975  | 0.759   | Biso | 1 | C  | -0.162 |
| H110 | 1 | 0.9789  | 0.4083  | 0.683   | Biso | 1 | H  | 0.120  |
| C152 | 1 | 0.0172  | 0.4155  | 0.8276  | Biso | 1 | C  | 0.110  |
| C153 | 1 | 0.0272  | 0.3994  | 0.9413  | Biso | 1 | C  | -0.160 |
| H111 | 1 | 0.0483  | 0.4115  | 0.9872  | Biso | 1 | H  | 0.125  |
| C154 | 1 | 0.0057  | 0.3653  | 0.9865  | Biso | 1 | C  | -0.094 |
| H112 | 1 | 0.0124  | 0.3545  | 0.0626  | Biso | 1 | H  | 0.128  |
| C155 | 1 | 0.0684  | 0.5292  | 0.6858  | Biso | 1 | C  | 0.003  |
| C156 | 1 | 0.0413  | 0.451   | 0.786   | Biso | 1 | C  | -0.017 |
| C157 | 1 | 0.0496  | 0.4618  | 0.666   | Biso | 1 | C  | 0.192  |
| C158 | 1 | 0.0625  | 0.5288  | 0.813   | Biso | 1 | C  | 0.110  |
| C159 | 1 | 0.0607  | 0.4976  | 0.6     | Biso | 1 | C  | -0.249 |
| H113 | 1 | 0.0626  | 0.5     | 0.5156  | Biso | 1 | H  | 0.157  |
| C160 | 1 | 0.0428  | 0.4909  | 0.843   | Biso | 1 | C  | -0.210 |
| H114 | 1 | 0.0278  | 0.4922  | 0.9156  | Biso | 1 | H  | 0.090  |
| C161 | 1 | 0.0736  | 0.5638  | 0.901   | Biso | 1 | C  | -0.514 |
| H115 | 1 | 0.1034  | 0.5642  | 0.9075  | Biso | 1 | H  | 0.161  |
| H116 | 1 | 0.0618  | 0.5566  | 0.9786  | Biso | 1 | H  | 0.168  |

|      |   |         |         |         |        |         |      |        |        |        |
|------|---|---------|---------|---------|--------|---------|------|--------|--------|--------|
| H117 | 1 | 0.0638  | 0.5908  | 0.8771  | Biso   | 1       | H    | 0.175  |        |        |
| C162 | 1 | 0.0531  | 0.4262  | 0.598   | Biso   | 1       | C    | -0.577 |        |        |
| H118 | 1 | 0.0363  | 0.4318  | 0.5274  | Biso   | 1       | H    | 0.160  |        |        |
| H119 | 1 | 0.0812  | 0.4209  | 0.5728  | Biso   | 1       | H    | 0.181  |        |        |
| H120 | 1 | 0.0424  | 0.4023  | 0.6397  | Biso   | 1       | H    | 0.158  |        |        |
| Zn7  | 1 | 0.78384 |         | 0.28391 |        | 0.60755 | Biso | 1      | Zn     | 0.766  |
| N31  | 1 | 0.77538 |         | 0.14414 |        | 0.8801  | Biso | 1      | N      | -0.265 |
| O25  | 1 | 0.9185  | 0.20005 |         | 0.0881 | Biso    | 1    | O      | -0.567 |        |
| N32  | 1 | 0.75632 |         | 0.18933 |        | 0.7214  | Biso | 1      | N      | -0.327 |
| N33  | 1 | 0.84388 |         | 0.1563  | 0.0176 | Biso    | 1    | N      | -0.704 |        |
| H121 | 1 | 0.8275  | 0.1353  | 0.0232  | Biso   | 1       | H    | 0.345  |        |        |
| H122 | 1 | 0.865   | 0.1583  | 0.0651  | Biso   | 1       | H    | 0.361  |        |        |
| O26  | 1 | 0.15682 |         | 0.8428  | 0.6791 | Biso    | 1    | O      | -0.568 |        |
| C163 | 1 | 0.7452  | 0.1521  | 0.7826  | Biso   | 1       | C    | 0.145  |        |        |
| H123 | 1 | 0.7225  | 0.1354  | 0.7639  | Biso   | 1       | H    | 0.116  |        |        |
| O27  | 1 | 0.1812  | 0.8184  | 0.5045  | Biso   | 1       | O    | -0.574 |        |        |
| C164 | 1 | 0.1588  | 0.8444  | 0.5675  | Biso   | 1       | C    | 0.580  |        |        |
| C165 | 1 | 0.83529 |         | 0.19057 |        | 0.9221  | Biso | 1      | C      | 0.374  |
| C166 | 1 | 0.79962 |         | 0.17997 |        | 0.8576  | Biso | 1      | C      | -0.047 |
| C167 | 1 | 0.78648 |         | 0.20459 |        | 0.7609  | Biso | 1      | C      | 0.345  |
| N34  | 1 | 0.80901 |         | 0.23982 |        | 0.7287  | Biso | 1      | N      | -0.349 |
| C168 | 1 | 0.84468 |         | 0.25043 |        | 0.7932  | Biso | 1      | C      | 0.244  |
| H124 | 1 | 0.8598  | 0.274   | 0.7716  | Biso   | 1       | H    | 0.123  |        |        |
| N35  | 1 | 0.85782 |         | 0.2258  | 0.8898 | Biso    | 1    | N      | -0.337 |        |
| C169 | 1 | 0.0996  | 0.8889  | 0.5401  | Biso   | 1       | C    | -0.112 |        |        |
| H125 | 1 | 0.0888  | 0.8759  | 0.6089  | Biso   | 1       | H    | 0.115  |        |        |
| C170 | 1 | 0.0759  | 0.918   | 0.4773  | Biso   | 1       | C    | -0.161 |        |        |
| H126 | 1 | 0.0492  | 0.9245  | 0.5041  | Biso   | 1       | H    | 0.114  |        |        |
| C171 | 1 | 0.092   | 0.9373  | 0.3744  | Biso   | 1       | C    | 0.100  |        |        |
| C172 | 1 | 0.1318  | 0.9276  | 0.3343  | Biso   | 1       | C    | -0.158 |        |        |
| H127 | 1 | 0.1426  | 0.9405  | 0.2654  | Biso   | 1       | H    | 0.116  |        |        |
| C173 | 1 | 0.1555  | 0.8985  | 0.397   | Biso   | 1       | C    | -0.115 |        |        |
| H128 | 1 | 0.1822  | 0.8919  | 0.3702  | Biso   | 1       | H    | 0.107  |        |        |
| C174 | 1 | 0.1394  | 0.8791  | 0.5     | Biso   | 1       | C    | -0.035 |        |        |
| O28  | 1 | 0.9587  | 0.2041  | 0.9286  | Biso   | 1       | O    | -0.540 |        |        |
| C175 | 1 | 0.95    | 0.1858  | 0.029   | Biso   | 1       | C    | 0.551  |        |        |
| C176 | 1 | 0.9741  | 0.1528  | 0.082   | Biso   | 1       | C    | -0.024 |        |        |
| C177 | 1 | 0.9641  | 0.1367  | 0.1957  | Biso   | 1       | C    | -0.108 |        |        |
| H129 | 1 | 0.943   | 0.1487  | 0.2416  | Biso   | 1       | H    | 0.119  |        |        |
| C178 | 1 | 0.9856  | 0.1025  | 0.241   | Biso   | 1       | C    | -0.162 |        |        |
| H130 | 1 | 0.9789  | 0.0917  | 0.317   | Biso   | 1       | H    | 0.120  |        |        |
| C179 | 1 | 0.0172  | 0.0845  | 0.1724  | Biso   | 1       | C    | 0.110  |        |        |
| C180 | 1 | 0.0272  | 0.1006  | 0.0587  | Biso   | 1       | C    | -0.160 |        |        |
| H131 | 1 | 0.0483  | 0.0885  | 0.0128  | Biso   | 1       | H    | 0.125  |        |        |
| C181 | 1 | 0.0057  | 0.1347  | 0.0135  | Biso   | 1       | C    | -0.094 |        |        |
| H132 | 1 | 0.0124  | 0.1455  | 0.9374  | Biso   | 1       | H    | 0.128  |        |        |
| C182 | 1 | 0.0684  | 0.9708  | 0.3142  | Biso   | 1       | C    | 0.003  |        |        |
| C183 | 1 | 0.0413  | 0.049   | 0.214   | Biso   | 1       | C    | -0.017 |        |        |
| C184 | 1 | 0.0496  | 0.0382  | 0.334   | Biso   | 1       | C    | 0.192  |        |        |
| C185 | 1 | 0.0625  | 0.9712  | 0.187   | Biso   | 1       | C    | 0.110  |        |        |
| C186 | 1 | 0.0607  | 0.0024  | 0.4     | Biso   | 1       | C    | -0.249 |        |        |
| H133 | 1 | 0.0626  | 0       | 0.4844  | Biso   | 1       | H    | 0.158  |        |        |

|      |   |         |         |         |        |         |      |        |        |        |
|------|---|---------|---------|---------|--------|---------|------|--------|--------|--------|
| C187 | 1 | 0.0428  | 0.0091  | 0.157   | Biso   | 1       | C    | -0.210 |        |        |
| H134 | 1 | 0.0278  | 0.0078  | 0.0844  | Biso   | 1       | H    | 0.090  |        |        |
| C188 | 1 | 0.0736  | 0.9362  | 0.099   | Biso   | 1       | C    | -0.514 |        |        |
| H135 | 1 | 0.1034  | 0.9358  | 0.0925  | Biso   | 1       | H    | 0.161  |        |        |
| H136 | 1 | 0.0618  | 0.9434  | 0.0214  | Biso   | 1       | H    | 0.168  |        |        |
| H137 | 1 | 0.0638  | 0.9092  | 0.1229  | Biso   | 1       | H    | 0.175  |        |        |
| C189 | 1 | 0.0531  | 0.0738  | 0.402   | Biso   | 1       | C    | -0.577 |        |        |
| H138 | 1 | 0.0363  | 0.0682  | 0.4726  | Biso   | 1       | H    | 0.160  |        |        |
| H139 | 1 | 0.0812  | 0.0791  | 0.4272  | Biso   | 1       | H    | 0.181  |        |        |
| H140 | 1 | 0.0424  | 0.0977  | 0.3603  | Biso   | 1       | H    | 0.158  |        |        |
| Zn8  | 1 | 0.71616 |         | 0.21609 |        | 0.60755 | Biso | 1      | Zn     | 0.766  |
| N36  | 1 | 0.72462 |         | 0.35586 |        | 0.8801  | Biso | 1      | N      | -0.265 |
| O29  | 1 | 0.5815  | 0.29995 |         | 0.0881 | Biso    | 1    | O      | -0.567 |        |
| N37  | 1 | 0.74368 |         | 0.31067 |        | 0.7214  | Biso | 1      | N      | -0.327 |
| N38  | 1 | 0.65612 |         | 0.3437  | 0.0176 | Biso    | 1    | N      | -0.704 |        |
| H141 | 1 | 0.6725  | 0.3647  | 0.0232  | Biso   | 1       | H    | 0.345  |        |        |
| H142 | 1 | 0.635   | 0.3417  | 0.0651  | Biso   | 1       | H    | 0.361  |        |        |
| O30  | 1 | 0.34318 |         | 0.6572  | 0.6791 | Biso    | 1    | O      | -0.568 |        |
| C190 | 1 | 0.7548  | 0.3479  | 0.7826  | Biso   | 1       | C    | 0.146  |        |        |
| H143 | 1 | 0.7775  | 0.3646  | 0.7639  | Biso   | 1       | H    | 0.116  |        |        |
| O31  | 1 | 0.3188  | 0.6816  | 0.5045  | Biso   | 1       | O    | -0.574 |        |        |
| C191 | 1 | 0.3412  | 0.6556  | 0.5675  | Biso   | 1       | C    | 0.580  |        |        |
| C192 | 1 | 0.66471 |         | 0.30943 |        | 0.9221  | Biso | 1      | C      | 0.374  |
| C193 | 1 | 0.70038 |         | 0.32003 |        | 0.8576  | Biso | 1      | C      | -0.047 |
| C194 | 1 | 0.71352 |         | 0.29541 |        | 0.7609  | Biso | 1      | C      | 0.344  |
| N39  | 1 | 0.69099 |         | 0.26018 |        | 0.7287  | Biso | 1      | N      | -0.349 |
| C195 | 1 | 0.65532 |         | 0.24957 |        | 0.7932  | Biso | 1      | C      | 0.244  |
| H144 | 1 | 0.6402  | 0.226   | 0.7716  | Biso   | 1       | H    | 0.123  |        |        |
| N40  | 1 | 0.64218 |         | 0.2742  | 0.8898 | Biso    | 1    | N      | -0.336 |        |
| C196 | 1 | 0.4004  | 0.6111  | 0.5401  | Biso   | 1       | C    | -0.112 |        |        |
| H145 | 1 | 0.4112  | 0.6241  | 0.6089  | Biso   | 1       | H    | 0.115  |        |        |
| C197 | 1 | 0.4241  | 0.582   | 0.4773  | Biso   | 1       | C    | -0.161 |        |        |
| H146 | 1 | 0.4508  | 0.5755  | 0.5041  | Biso   | 1       | H    | 0.114  |        |        |
| C198 | 1 | 0.408   | 0.5627  | 0.3744  | Biso   | 1       | C    | 0.100  |        |        |
| C199 | 1 | 0.3682  | 0.5724  | 0.3343  | Biso   | 1       | C    | -0.158 |        |        |
| H147 | 1 | 0.3574  | 0.5595  | 0.2654  | Biso   | 1       | H    | 0.116  |        |        |
| C200 | 1 | 0.3445  | 0.6015  | 0.397   | Biso   | 1       | C    | -0.115 |        |        |
| H148 | 1 | 0.3178  | 0.6081  | 0.3702  | Biso   | 1       | H    | 0.107  |        |        |
| C201 | 1 | 0.3606  | 0.6209  | 0.5     | Biso   | 1       | C    | -0.035 |        |        |
| O32  | 1 | 0.5413  | 0.2959  | 0.9286  | Biso   | 1       | O    | -0.540 |        |        |
| C202 | 1 | 0.55    | 0.3142  | 0.029   | Biso   | 1       | C    | 0.551  |        |        |
| C203 | 1 | 0.5259  | 0.3472  | 0.082   | Biso   | 1       | C    | -0.024 |        |        |
| C204 | 1 | 0.5359  | 0.3633  | 0.1957  | Biso   | 1       | C    | -0.108 |        |        |
| H149 | 1 | 0.557   | 0.3513  | 0.2416  | Biso   | 1       | H    | 0.119  |        |        |
| C205 | 1 | 0.5144  | 0.3975  | 0.241   | Biso   | 1       | C    | -0.162 |        |        |
| H150 | 1 | 0.5211  | 0.4083  | 0.317   | Biso   | 1       | H    | 0.120  |        |        |
| C206 | 1 | 0.4828  | 0.4155  | 0.1724  | Biso   | 1       | C    | 0.110  |        |        |
| C207 | 1 | 0.4728  | 0.3994  | 0.0587  | Biso   | 1       | C    | -0.160 |        |        |
| H151 | 1 | 0.4517  | 0.4115  | 0.0128  | Biso   | 1       | H    | 0.125  |        |        |
| C208 | 1 | 0.4943  | 0.3653  | 0.0135  | Biso   | 1       | C    | -0.094 |        |        |
| H152 | 1 | 0.4876  | 0.3545  | 0.9374  | Biso   | 1       | H    | 0.128  |        |        |
| C209 | 1 | 0.4316  | 0.5292  | 0.3142  | Biso   | 1       | C    | 0.003  |        |        |

|      |   |        |         |        |      |   |    |        |
|------|---|--------|---------|--------|------|---|----|--------|
| C210 | 1 | 0.4587 | 0.451   | 0.214  | Biso | 1 | C  | -0.017 |
| C211 | 1 | 0.4504 | 0.4618  | 0.334  | Biso | 1 | C  | 0.192  |
| C212 | 1 | 0.4375 | 0.5288  | 0.187  | Biso | 1 | C  | 0.110  |
| C213 | 1 | 0.4393 | 0.4976  | 0.4    | Biso | 1 | C  | -0.249 |
| H153 | 1 | 0.4374 | 0.5     | 0.4844 | Biso | 1 | H  | 0.157  |
| C214 | 1 | 0.4572 | 0.4909  | 0.157  | Biso | 1 | C  | -0.210 |
| H154 | 1 | 0.4722 | 0.4922  | 0.0844 | Biso | 1 | H  | 0.090  |
| C215 | 1 | 0.4264 | 0.5638  | 0.099  | Biso | 1 | C  | -0.514 |
| H155 | 1 | 0.3966 | 0.5642  | 0.0925 | Biso | 1 | H  | 0.161  |
| H156 | 1 | 0.4382 | 0.5566  | 0.0214 | Biso | 1 | H  | 0.168  |
| H157 | 1 | 0.4362 | 0.5908  | 0.1229 | Biso | 1 | H  | 0.175  |
| C216 | 1 | 0.4469 | 0.4262  | 0.402  | Biso | 1 | C  | -0.577 |
| H158 | 1 | 0.4637 | 0.4318  | 0.4726 | Biso | 1 | H  | 0.160  |
| H159 | 1 | 0.4188 | 0.4209  | 0.4272 | Biso | 1 | H  | 0.181  |
| H160 | 1 | 0.4576 | 0.4023  | 0.3603 | Biso | 1 | H  | 0.158  |
| Zn9  | 1 | 0.25   | 0.89931 | 0      | Biso | 1 | Zn | 0.260  |
| Zn10 | 1 | 0.25   | 0.60069 | 0      | Biso | 1 | Zn | 0.258  |
| Zn11 | 1 | 0.75   | 0.10069 | 0      | Biso | 1 | Zn | 0.258  |
| Zn12 | 1 | 0.75   | 0.39931 | 0      | Biso | 1 | Zn | 0.258  |
| Zn13 | 1 | 0.3993 | 0.75    | 0      | Biso | 1 | Zn | 0.798  |
| Zn14 | 1 | 0.1007 | 0.75    | 0      | Biso | 1 | Zn | 0.797  |
| Zn15 | 1 | 0.6007 | 0.25    | 0      | Biso | 1 | Zn | 0.798  |
| Zn16 | 1 | 0.8993 | 0.25    | 0      | Biso | 1 | Zn | 0.798  |
| O33  | 1 | 0.25   | 0.75    | 0.5    | Biso | 1 | O  | -0.851 |
| O34  | 1 | 0.75   | 0.25    | 0.5    | Biso | 1 | O  | -0.851 |

```

data_IZUMUM_clean
_audit_creation_date      2014-07-02
_audit_creation_method    'Materials Studio'
_symmetry_space_group_name_H-M  'P1'
_symmetry_Int_Tables_number  1
_symmetry_cell_setting    triclinic
loop_
_symmetry_equiv_pos_as_xyz
  x,y,z
_cell_length_a            15.2980
_cell_length_b            15.2980
_cell_length_c            15.6131
_cell_angle_alpha         119.3350
_cell_angle_beta          119.3350
_cell_angle_gamma         90.0000
loop_
_atom_site_label
_atom_site_type_symbol
_atom_site_fract_x
_atom_site_fract_y
_atom_site_fract_z
_atom_site_U_iso_or_equiv
_atom_site_adp_type
_atom_site_occupancy
_atom_site_charge
Cu1  Cu   0.42563    0.48407    0.88834    0.01267    Uiso  1    0.652368
Cu2  Cu   0.96271    0.40427    0.88834    0.01267    Uiso  1    0.652499
Cu3  Cu   0.98407    0.46271    0.38834    0.01267    Uiso  1    0.651703
Cu4  Cu   0.90427    0.92563    0.38834    0.01267    Uiso  1    0.652757
Cu5  Cu   0.57437    0.51593    0.11166    0.01267    Uiso  1    0.652385
Cu6  Cu   0.03729    0.59573    0.11166    0.01267    Uiso  1    0.65243
Cu7  Cu   0.01593    0.53729    0.61166    0.01267    Uiso  1    0.651897
Cu8  Cu   0.09573    0.07437    0.61166    0.01267    Uiso  1    0.652636
H1   H    0.457 0.6319 0.8154 0.01267    Uiso  1    0.080586
H2   H    0.7948 0.9342 0.172 0.01267    Uiso  1    0.347505
H3   H    0.7286 0.921 0.0554 0.01267    Uiso  1    0.35264
H4   H    0.7735 0.7174 0.301 0.01267    Uiso  1    0.090442
H5   H    0.6052 0.2858 0.7684 0.01267    Uiso  1    0.17908
H6   H    0.711 0.3474 0.895 0.01267    Uiso  1    0.191295
H7   H    0.6311 0.2486 0.8532 0.01267    Uiso  1    0.199069
H8   H    0.8584 0.1835 0.8154 0.01267    Uiso  1    0.080109
H9   H    0.8772 0.2378 0.172 0.01267    Uiso  1    0.351187
H10  H    0.8268 0.1344 0.0554 0.01267    Uiso  1    0.353667
H11  H    0.0275 0.5836 0.301 0.01267    Uiso  1    0.090925
H12  H    0.6632 0.4826 0.7684 0.01267    Uiso  1    0.179022
H13  H    0.684 0.5476 0.895 0.01267    Uiso  1    0.191589
H14  H    0.7221 0.6046 0.8532 0.01267    Uiso  1    0.199708
H15  H    0.1319 0.3584 0.3154 0.01267    Uiso  1    0.080212
H16  H    0.4342 0.3772 0.672 0.01267    Uiso  1    0.350047
H17  H    0.421 0.3268 0.5554 0.01267    Uiso  1    0.353858

```

|     |   |        |        |        |         |      |   |           |
|-----|---|--------|--------|--------|---------|------|---|-----------|
| H18 | H | 0.2174 | 0.5275 | 0.801  | 0.01267 | Uiso | 1 | 0.090479  |
| H19 | H | 0.7858 | 0.1632 | 0.2684 | 0.01267 | Uiso | 1 | 0.179575  |
| H20 | H | 0.8474 | 0.184  | 0.395  | 0.01267 | Uiso | 1 | 0.191584  |
| H21 | H | 0.7486 | 0.2221 | 0.3532 | 0.01267 | Uiso | 1 | 0.199742  |
| H22 | H | 0.6835 | 0.957  | 0.3154 | 0.01267 | Uiso | 1 | 0.080576  |
| H23 | H | 0.7378 | 0.2948 | 0.672  | 0.01267 | Uiso | 1 | 0.346623  |
| H24 | H | 0.6344 | 0.2286 | 0.5554 | 0.01267 | Uiso | 1 | 0.35339   |
| H25 | H | 0.0836 | 0.2735 | 0.801  | 0.01267 | Uiso | 1 | 0.090855  |
| H26 | H | 0.9826 | 0.1052 | 0.2684 | 0.01267 | Uiso | 1 | 0.179291  |
| H27 | H | 0.0476 | 0.211  | 0.395  | 0.01267 | Uiso | 1 | 0.19201   |
| H28 | H | 0.1046 | 0.1311 | 0.3532 | 0.01267 | Uiso | 1 | 0.199457  |
| H29 | H | 0.543  | 0.3681 | 0.1846 | 0.01267 | Uiso | 1 | 0.080582  |
| H30 | H | 0.2052 | 0.0658 | 0.828  | 0.01267 | Uiso | 1 | 0.347476  |
| H31 | H | 0.2714 | 0.079  | 0.9446 | 0.01267 | Uiso | 1 | 0.35268   |
| H32 | H | 0.2265 | 0.2826 | 0.699  | 0.01267 | Uiso | 1 | 0.090417  |
| H33 | H | 0.3948 | 0.7142 | 0.2316 | 0.01267 | Uiso | 1 | 0.179139  |
| H34 | H | 0.289  | 0.6526 | 0.105  | 0.01267 | Uiso | 1 | 0.191365  |
| H35 | H | 0.3689 | 0.7514 | 0.1468 | 0.01267 | Uiso | 1 | 0.198994  |
| H36 | H | 0.1416 | 0.8165 | 0.1846 | 0.01267 | Uiso | 1 | 0.080149  |
| H37 | H | 0.1228 | 0.7622 | 0.828  | 0.01267 | Uiso | 1 | 0.351049  |
| H38 | H | 0.1732 | 0.8656 | 0.9446 | 0.01267 | Uiso | 1 | 0.353649  |
| H39 | H | 0.9725 | 0.4164 | 0.699  | 0.01267 | Uiso | 1 | 0.090974  |
| H40 | H | 0.3368 | 0.5174 | 0.2316 | 0.01267 | Uiso | 1 | 0.178976  |
| H41 | H | 0.316  | 0.4524 | 0.105  | 0.01267 | Uiso | 1 | 0.191435  |
| H42 | H | 0.2779 | 0.3954 | 0.1468 | 0.01267 | Uiso | 1 | 0.199837  |
| H43 | H | 0.8681 | 0.6416 | 0.6846 | 0.01267 | Uiso | 1 | 0.080268  |
| H44 | H | 0.5658 | 0.6228 | 0.328  | 0.01267 | Uiso | 1 | 0.350022  |
| H45 | H | 0.579  | 0.6732 | 0.4446 | 0.01267 | Uiso | 1 | 0.353995  |
| H46 | H | 0.7826 | 0.4725 | 0.199  | 0.01267 | Uiso | 1 | 0.090356  |
| H47 | H | 0.2142 | 0.8368 | 0.7316 | 0.01267 | Uiso | 1 | 0.179588  |
| H48 | H | 0.1526 | 0.816  | 0.605  | 0.01267 | Uiso | 1 | 0.191507  |
| H49 | H | 0.2514 | 0.7779 | 0.6468 | 0.01267 | Uiso | 1 | 0.199628  |
| H50 | H | 0.3165 | 0.043  | 0.6846 | 0.01267 | Uiso | 1 | 0.080536  |
| H51 | H | 0.2622 | 0.7052 | 0.328  | 0.01267 | Uiso | 1 | 0.346641  |
| H52 | H | 0.3656 | 0.7714 | 0.4446 | 0.01267 | Uiso | 1 | 0.353349  |
| H53 | H | 0.9164 | 0.7265 | 0.199  | 0.01267 | Uiso | 1 | 0.090832  |
| H54 | H | 0.0174 | 0.8948 | 0.7316 | 0.01267 | Uiso | 1 | 0.179306  |
| H55 | H | 0.9524 | 0.789  | 0.605  | 0.01267 | Uiso | 1 | 0.192016  |
| H56 | H | 0.8954 | 0.8689 | 0.6468 | 0.01267 | Uiso | 1 | 0.19952   |
| C1  | C | 0.5175 | 0.6626 | 0.8914 | 0.01267 | Uiso | 1 | 0.227469  |
| C2  | C | 0.6156 | 0.6662 | 0.0562 | 0.01267 | Uiso | 1 | 0.277035  |
| C3  | C | 0.6899 | 0.7642 | 0.116  | 0.01267 | Uiso | 1 | -0.042025 |
| C4  | C | 0.676  | 0.8046 | 0.0542 | 0.01267 | Uiso | 1 | 0.397211  |
| C5  | C | 0.7359 | 0.7171 | 0.2326 | 0.01267 | Uiso | 1 | 0.18813   |
| C6  | C | 0.583  | 0.3801 | 0.9002 | 0.01267 | Uiso | 1 | 0.717775  |
| C7  | C | 0.6376 | 0.309  | 0.8496 | 0.01267 | Uiso | 1 | -0.611188 |
| C8  | C | 0.8739 | 0.2288 | 0.8914 | 0.01267 | Uiso | 1 | 0.228265  |
| C9  | C | 0.9406 | 0.39   | 0.0562 | 0.01267 | Uiso | 1 | 0.275626  |
| C10 | C | 0.9261 | 0.3518 | 0.116  | 0.01267 | Uiso | 1 | -0.040752 |
| C11 | C | 0.8782 | 0.2496 | 0.0542 | 0.01267 | Uiso | 1 | 0.398224  |
| C12 | C | 0.9967 | 0.5155 | 0.2326 | 0.01267 | Uiso | 1 | 0.18826   |
| C13 | C | 0.8172 | 0.5201 | 0.9002 | 0.01267 | Uiso | 1 | 0.717013  |

|     |   |        |        |        |         |      |   |           |
|-----|---|--------|--------|--------|---------|------|---|-----------|
| C14 | C | 0.712  | 0.5406 | 0.8496 | 0.01267 | Uiso | 1 | -0.612868 |
| C15 | C | 0.1626 | 0.3739 | 0.3914 | 0.01267 | Uiso | 1 | 0.228777  |
| C16 | C | 0.1662 | 0.4406 | 0.5562 | 0.01267 | Uiso | 1 | 0.276343  |
| C17 | C | 0.2642 | 0.4261 | 0.616  | 0.01267 | Uiso | 1 | -0.042293 |
| C18 | C | 0.3046 | 0.3782 | 0.5542 | 0.01267 | Uiso | 1 | 0.398902  |
| C19 | C | 0.2171 | 0.4967 | 0.7326 | 0.01267 | Uiso | 1 | 0.188052  |
| C20 | C | 0.8801 | 0.3172 | 0.4002 | 0.01267 | Uiso | 1 | 0.718198  |
| C21 | C | 0.809  | 0.212  | 0.3496 | 0.01267 | Uiso | 1 | -0.613209 |
| C22 | C | 0.7288 | 0.0175 | 0.3914 | 0.01267 | Uiso | 1 | 0.227062  |
| C23 | C | 0.89   | 0.1156 | 0.5562 | 0.01267 | Uiso | 1 | 0.276907  |
| C24 | C | 0.8518 | 0.1899 | 0.616  | 0.01267 | Uiso | 1 | -0.041358 |
| C25 | C | 0.7496 | 0.176  | 0.5542 | 0.01267 | Uiso | 1 | 0.39768   |
| C26 | C | 0.0155 | 0.2359 | 0.7326 | 0.01267 | Uiso | 1 | 0.188246  |
| C27 | C | 0.0201 | 0.083  | 0.4002 | 0.01267 | Uiso | 1 | 0.717124  |
| C28 | C | 0.0406 | 0.1376 | 0.3496 | 0.01267 | Uiso | 1 | -0.61334  |
| C29 | C | 0.4825 | 0.3374 | 0.1086 | 0.01267 | Uiso | 1 | 0.227419  |
| C30 | C | 0.3844 | 0.3338 | 0.9438 | 0.01267 | Uiso | 1 | 0.276894  |
| C31 | C | 0.3101 | 0.2358 | 0.884  | 0.01267 | Uiso | 1 | -0.0418   |
| C32 | C | 0.324  | 0.1954 | 0.9458 | 0.01267 | Uiso | 1 | 0.397182  |
| C33 | C | 0.2641 | 0.2829 | 0.7674 | 0.01267 | Uiso | 1 | 0.18813   |
| C34 | C | 0.417  | 0.6199 | 0.0998 | 0.01267 | Uiso | 1 | 0.717709  |
| C35 | C | 0.3624 | 0.691  | 0.1504 | 0.01267 | Uiso | 1 | -0.6112   |
| C36 | C | 0.1261 | 0.7712 | 0.1086 | 0.01267 | Uiso | 1 | 0.228157  |
| C37 | C | 0.0594 | 0.61   | 0.9438 | 0.01267 | Uiso | 1 | 0.275594  |
| C38 | C | 0.0739 | 0.6482 | 0.884  | 0.01267 | Uiso | 1 | -0.040859 |
| C39 | C | 0.1218 | 0.7504 | 0.9458 | 0.01267 | Uiso | 1 | 0.398249  |
| C40 | C | 0.0033 | 0.4845 | 0.7674 | 0.01267 | Uiso | 1 | 0.188177  |
| C41 | C | 0.1828 | 0.4799 | 0.0998 | 0.01267 | Uiso | 1 | 0.71712   |
| C42 | C | 0.288  | 0.4594 | 0.1504 | 0.01267 | Uiso | 1 | -0.612854 |
| C43 | C | 0.8374 | 0.6261 | 0.6086 | 0.01267 | Uiso | 1 | 0.22887   |
| C44 | C | 0.8338 | 0.5594 | 0.4438 | 0.01267 | Uiso | 1 | 0.276214  |
| C45 | C | 0.7358 | 0.5739 | 0.384  | 0.01267 | Uiso | 1 | -0.042205 |
| C46 | C | 0.6954 | 0.6218 | 0.4458 | 0.01267 | Uiso | 1 | 0.398881  |
| C47 | C | 0.7829 | 0.5033 | 0.2674 | 0.01267 | Uiso | 1 | 0.188154  |
| C48 | C | 0.1199 | 0.6828 | 0.5998 | 0.01267 | Uiso | 1 | 0.718034  |
| C49 | C | 0.191  | 0.788  | 0.6504 | 0.01267 | Uiso | 1 | -0.613103 |
| C50 | C | 0.2712 | 0.9825 | 0.6086 | 0.01267 | Uiso | 1 | 0.22712   |
| C51 | C | 0.11   | 0.8844 | 0.4438 | 0.01267 | Uiso | 1 | 0.276804  |
| C52 | C | 0.1482 | 0.8101 | 0.384  | 0.01267 | Uiso | 1 | -0.04133  |
| C53 | C | 0.2504 | 0.824  | 0.4458 | 0.01267 | Uiso | 1 | 0.397677  |
| C54 | C | 0.9845 | 0.7641 | 0.2674 | 0.01267 | Uiso | 1 | 0.188261  |
| C55 | C | 0.9799 | 0.917  | 0.5998 | 0.01267 | Uiso | 1 | 0.717092  |
| C56 | C | 0.9594 | 0.8624 | 0.6504 | 0.01267 | Uiso | 1 | -0.613295 |
| N1  | N | 0.584  | 0.7493 | 0.9342 | 0.01267 | Uiso | 1 | -0.434086 |
| N2  | N | 0.5268 | 0.6133 | 0.9444 | 0.01267 | Uiso | 1 | -0.34568  |
| N3  | N | 0.7411 | 0.8981 | 0.0994 | 0.01267 | Uiso | 1 | -0.678818 |
| N4  | N | 0.7664 | 0.7946 | 0.2268 | 0.01267 | Uiso | 1 | -0.331745 |
| N5  | N | 0.6474 | 0.6387 | 0.1332 | 0.01267 | Uiso | 1 | -0.36112  |
| N6  | N | 0.8502 | 0.1849 | 0.9342 | 0.01267 | Uiso | 1 | -0.434192 |
| N7  | N | 0.9176 | 0.3311 | 0.9444 | 0.01267 | Uiso | 1 | -0.34482  |
| N8  | N | 0.8583 | 0.2013 | 0.0994 | 0.01267 | Uiso | 1 | -0.684896 |
| N9  | N | 0.9604 | 0.4322 | 0.2268 | 0.01267 | Uiso | 1 | -0.332454 |

|     |   |        |        |        |         |      |   |           |
|-----|---|--------|--------|--------|---------|------|---|-----------|
| N10 | N | 0.9858 | 0.4945 | 0.1332 | 0.01267 | Uiso | 1 | -0.36137  |
| N11 | N | 0.2493 | 0.3502 | 0.4342 | 0.01267 | Uiso | 1 | -0.435427 |
| N12 | N | 0.1133 | 0.4176 | 0.4444 | 0.01267 | Uiso | 1 | -0.344763 |
| N13 | N | 0.3981 | 0.3583 | 0.5994 | 0.01267 | Uiso | 1 | -0.683807 |
| N14 | N | 0.2946 | 0.4604 | 0.7268 | 0.01267 | Uiso | 1 | -0.330986 |
| N15 | N | 0.1387 | 0.4858 | 0.6332 | 0.01267 | Uiso | 1 | -0.361371 |
| N16 | N | 0.6849 | 0.084  | 0.4342 | 0.01267 | Uiso | 1 | -0.434372 |
| N17 | N | 0.8311 | 0.0268 | 0.4444 | 0.01267 | Uiso | 1 | -0.345537 |
| N18 | N | 0.7013 | 0.2411 | 0.5994 | 0.01267 | Uiso | 1 | -0.678175 |
| N19 | N | 0.9322 | 0.2664 | 0.7268 | 0.01267 | Uiso | 1 | -0.332753 |
| N20 | N | 0.9945 | 0.1474 | 0.6332 | 0.01267 | Uiso | 1 | -0.362541 |
| N21 | N | 0.416  | 0.2507 | 0.0658 | 0.01267 | Uiso | 1 | -0.433905 |
| N22 | N | 0.4732 | 0.3867 | 0.0556 | 0.01267 | Uiso | 1 | -0.345623 |
| N23 | N | 0.2589 | 0.1019 | 0.9006 | 0.01267 | Uiso | 1 | -0.67866  |
| N24 | N | 0.2336 | 0.2054 | 0.7732 | 0.01267 | Uiso | 1 | -0.331861 |
| N25 | N | 0.3526 | 0.3613 | 0.8668 | 0.01267 | Uiso | 1 | -0.361342 |
| N26 | N | 0.1498 | 0.8151 | 0.0658 | 0.01267 | Uiso | 1 | -0.434146 |
| N27 | N | 0.0824 | 0.6689 | 0.0556 | 0.01267 | Uiso | 1 | -0.344686 |
| N28 | N | 0.1417 | 0.7987 | 0.9006 | 0.01267 | Uiso | 1 | -0.684898 |
| N29 | N | 0.0396 | 0.5678 | 0.7732 | 0.01267 | Uiso | 1 | -0.332372 |
| N30 | N | 0.0142 | 0.5055 | 0.8668 | 0.01267 | Uiso | 1 | -0.360959 |
| N31 | N | 0.7507 | 0.6498 | 0.5658 | 0.01267 | Uiso | 1 | -0.435388 |
| N32 | N | 0.8867 | 0.5824 | 0.5556 | 0.01267 | Uiso | 1 | -0.344573 |
| N33 | N | 0.6019 | 0.6417 | 0.4006 | 0.01267 | Uiso | 1 | -0.683875 |
| N34 | N | 0.7054 | 0.5396 | 0.2732 | 0.01267 | Uiso | 1 | -0.331012 |
| N35 | N | 0.8613 | 0.5142 | 0.3668 | 0.01267 | Uiso | 1 | -0.361742 |
| N36 | N | 0.3151 | 0.916  | 0.5658 | 0.01267 | Uiso | 1 | -0.434537 |
| N37 | N | 0.1689 | 0.9732 | 0.5556 | 0.01267 | Uiso | 1 | -0.345582 |
| N38 | N | 0.2987 | 0.7589 | 0.4006 | 0.01267 | Uiso | 1 | -0.678222 |
| N39 | N | 0.0678 | 0.7336 | 0.2732 | 0.01267 | Uiso | 1 | -0.332802 |
| N40 | N | 0.0055 | 0.8526 | 0.3668 | 0.01267 | Uiso | 1 | -0.362339 |
| O1  | O | 0.5096 | 0.3997 | 0.8362 | 0.01267 | Uiso | 1 | -0.551547 |
| O2  | O | 0.6207 | 0.418  | 0.0068 | 0.01267 | Uiso | 1 | -0.544534 |
| O3  | O | 0.8266 | 0.4365 | 0.8362 | 0.01267 | Uiso | 1 | -0.54951  |
| O4  | O | 0.8861 | 0.5888 | 0.0068 | 0.01267 | Uiso | 1 | -0.545113 |
| O5  | O | 0.8997 | 0.3266 | 0.3362 | 0.01267 | Uiso | 1 | -0.551351 |
| O6  | O | 0.918  | 0.3861 | 0.5068 | 0.01267 | Uiso | 1 | -0.54451  |
| O7  | O | 0.9365 | 0.0096 | 0.3362 | 0.01267 | Uiso | 1 | -0.549684 |
| O8  | O | 0.0888 | 0.1207 | 0.5068 | 0.01267 | Uiso | 1 | -0.544019 |
| O9  | O | 0.4904 | 0.6003 | 0.1638 | 0.01267 | Uiso | 1 | -0.551448 |
| O10 | O | 0.3793 | 0.582  | 0.9932 | 0.01267 | Uiso | 1 | -0.544529 |
| O11 | O | 0.1734 | 0.5635 | 0.1638 | 0.01267 | Uiso | 1 | -0.549543 |
| O12 | O | 0.1139 | 0.4112 | 0.9932 | 0.01267 | Uiso | 1 | -0.545264 |
| O13 | O | 0.1003 | 0.6734 | 0.6638 | 0.01267 | Uiso | 1 | -0.55129  |
| O14 | O | 0.082  | 0.6139 | 0.4932 | 0.01267 | Uiso | 1 | -0.544416 |
| O15 | O | 0.0635 | 0.9904 | 0.6638 | 0.01267 | Uiso | 1 | -0.549613 |
| O16 | O | 0.9112 | 0.8793 | 0.4932 | 0.01267 | Uiso | 1 | -0.544039 |

```

data_NUDLAA_clean
_audit_creation_date      2014-07-02
_audit_creation_method    'Materials Studio'
_symmetry_space_group_name_H-M  'P1'
_symmetry_Int_Tables_number  1
_symmetry_cell_setting    triclinic
loop_
_symmetry_equiv_pos_as_xyz
  x,y,z
_cell_length_a11.1753
_cell_length_b      27.609
_cell_length_c27.609
_cell_angle_alpha   87.6526
_cell_angle_beta    78.3236
_cell_angle_gamma   78.3237
loop_
_atom_site_label
_atom_site_type_symbol
_atom_site_fract_x
_atom_site_fract_y
_atom_site_fract_z
_atom_site_U_iso_or_equiv
_atom_site_adp_type
_atom_site_occupancy
_atom_site_charge
Zn1  Zn   0.39435   0.45855   0.45975   0.01267   Uiso  1.00  0.775036
Zn2  Zn   0.31265   0.54145   0.54025   0.01267   Uiso  1.00  0.774536
Zn3  Zn   0.1041 0.04025   0.95855   0.01267   Uiso  1.00  0.775488
Zn4  Zn   0.1029 0.95975   0.04145   0.01267   Uiso  1.00  0.775100
Zn5  Zn   0.93735   0.95975   0.95855   0.01267   Uiso  1.00  0.774393
Zn6  Zn   0.85565   0.04025   0.04145   0.01267   Uiso  1.00  0.775036
Zn7  Zn   0.1471 0.45855   0.54025   0.01267   Uiso  1.00  0.775296
Zn8  Zn   0.1459 0.54145   0.45975   0.01267   Uiso  1.00  0.775359
Zn9  Zn   0.41168   0.17664   0         0.01267   Uiso  1.00  0.827327
Zn10 Zn   0.58832   0.82336   0         0.01267   Uiso  1.00  0.826218
Zn11 Zn   0.66168   0.5       0.67664   0.01267   Uiso  1.00  0.824549
Zn12 Zn   0.83832   0.5       0.32336   0.01267   Uiso  1.00  0.827563
Zn13 Zn   0.41324   0         0.17352   0.01267   Uiso  1.00  0.776046
Zn14 Zn   0.58676   0         0.82648   0.01267   Uiso  1.00  0.774532
Zn15 Zn   0.83676   0.32648   0.5       0.01267   Uiso  1.00  0.775585
Zn16 Zn   0.66324   0.67352   0.5       0.01267   Uiso  1.00  0.776638
H1   H    0.4138 0.1347 0.0913 0.01267   Uiso  1.00  0.347803
H2   H    0.447  0.1017 0.1327 0.01267   Uiso  1.00  0.347121
H3   H    0.2257 0.1289 0.9655 0.01267   Uiso  1.00  0.098384
H4   H    0.218  0.9733 0.1295 0.01267   Uiso  1.00  0.103732
H5   H    0.5737 0.3268 0.3294 0.01267   Uiso  1.00  0.113822
H6   H    0.5505 0.2891 0.2591 0.01267   Uiso  1.00  0.106693
H7   H    0.2083 0.3735 0.2693 0.01267   Uiso  1.00  0.122722
H8   H    0.2315 0.4111 0.3395 0.01267   Uiso  1.00  0.119295
H9   H    0.4741 0.2388 0.2232 0.01267   Uiso  1.00  0.113252

```

|     |   |        |        |        |         |      |      |          |
|-----|---|--------|--------|--------|---------|------|------|----------|
| H10 | H | 0.4696 | 0.202  | 0.1498 | 0.01267 | Uiso | 1.00 | 0.120969 |
| H11 | H | 0.2447 | 0.3248 | 0.1132 | 0.01267 | Uiso | 1.00 | 0.126220 |
| H12 | H | 0.2492 | 0.3617 | 0.1865 | 0.01267 | Uiso | 1.00 | 0.126476 |
| H13 | H | 0.0377 | 0.9743 | 0.2939 | 0.01267 | Uiso | 1.00 | 0.126291 |
| H14 | H | 0.9346 | 0.9199 | 0.3439 | 0.01267 | Uiso | 1.00 | 0.128226 |
| H15 | H | 0.2143 | 0.8069 | 0.2921 | 0.01267 | Uiso | 1.00 | 0.116045 |
| H16 | H | 0.3175 | 0.8614 | 0.242  | 0.01267 | Uiso | 1.00 | 0.121330 |
| H17 | H | 0.6398 | 0.8653 | 0.9087 | 0.01267 | Uiso | 1.00 | 0.347416 |
| H18 | H | 0.6814 | 0.8983 | 0.8673 | 0.01267 | Uiso | 1.00 | 0.348902 |
| H19 | H | 0.3201 | 0.8711 | 0.0345 | 0.01267 | Uiso | 1.00 | 0.098034 |
| H20 | H | 0.3208 | 0.0267 | 0.8705 | 0.01267 | Uiso | 1.00 | 0.103442 |
| H21 | H | 0.2299 | 0.6732 | 0.6706 | 0.01267 | Uiso | 1.00 | 0.114118 |
| H22 | H | 0.0987 | 0.7109 | 0.7409 | 0.01267 | Uiso | 1.00 | 0.106340 |
| H23 | H | 0.8511 | 0.6265 | 0.7307 | 0.01267 | Uiso | 1.00 | 0.122012 |
| H24 | H | 0.9821 | 0.5889 | 0.6605 | 0.01267 | Uiso | 1.00 | 0.120583 |
| H25 | H | 0.9361 | 0.7612 | 0.7768 | 0.01267 | Uiso | 1.00 | 0.113522 |
| H26 | H | 0.8214 | 0.798  | 0.8502 | 0.01267 | Uiso | 1.00 | 0.120758 |
| H27 | H | 0.6827 | 0.6752 | 0.8868 | 0.01267 | Uiso | 1.00 | 0.127919 |
| H28 | H | 0.7974 | 0.6383 | 0.8135 | 0.01267 | Uiso | 1.00 | 0.126419 |
| H29 | H | 0.3059 | 0.0257 | 0.7061 | 0.01267 | Uiso | 1.00 | 0.126212 |
| H30 | H | 0.1984 | 0.0801 | 0.6561 | 0.01267 | Uiso | 1.00 | 0.127653 |
| H31 | H | 0.3133 | 0.1931 | 0.7079 | 0.01267 | Uiso | 1.00 | 0.115840 |
| H32 | H | 0.4209 | 0.1386 | 0.758  | 0.01267 | Uiso | 1.00 | 0.119814 |
| H33 | H | 0.7551 | 0.4087 | 0.6347 | 0.01267 | Uiso | 1.00 | 0.348136 |
| H34 | H | 0.8297 | 0.3673 | 0.6017 | 0.01267 | Uiso | 1.00 | 0.348169 |
| H35 | H | 0.4412 | 0.5345 | 0.6289 | 0.01267 | Uiso | 1.00 | 0.098225 |
| H36 | H | 0.5975 | 0.3705 | 0.4733 | 0.01267 | Uiso | 1.00 | 0.103926 |
| H37 | H | 0.1531 | 0.1706 | 0.8268 | 0.01267 | Uiso | 1.00 | 0.113435 |
| H38 | H | 0.0596 | 0.2409 | 0.7891 | 0.01267 | Uiso | 1.00 | 0.106521 |
| H39 | H | 0.7276 | 0.2307 | 0.8735 | 0.01267 | Uiso | 1.00 | 0.122905 |
| H40 | H | 0.821  | 0.1605 | 0.9111 | 0.01267 | Uiso | 1.00 | 0.118868 |
| H41 | H | 0.9473 | 0.2768 | 0.7388 | 0.01267 | Uiso | 1.00 | 0.112197 |
| H42 | H | 0.8694 | 0.3502 | 0.702  | 0.01267 | Uiso | 1.00 | 0.121472 |
| H43 | H | 0.6079 | 0.3868 | 0.8248 | 0.01267 | Uiso | 1.00 | 0.127314 |
| H44 | H | 0.6857 | 0.3135 | 0.8617 | 0.01267 | Uiso | 1.00 | 0.125987 |
| H45 | H | 0.5816 | 0.2061 | 0.4743 | 0.01267 | Uiso | 1.00 | 0.126485 |
| H46 | H | 0.5285 | 0.1561 | 0.4199 | 0.01267 | Uiso | 1.00 | 0.127117 |
| H47 | H | 0.7564 | 0.2079 | 0.3069 | 0.01267 | Uiso | 1.00 | 0.116542 |
| H48 | H | 0.8095 | 0.258  | 0.3614 | 0.01267 | Uiso | 1.00 | 0.120354 |
| H49 | H | 0.7985 | 0.5913 | 0.3653 | 0.01267 | Uiso | 1.00 | 0.348306 |
| H50 | H | 0.7987 | 0.6327 | 0.3983 | 0.01267 | Uiso | 1.00 | 0.349961 |
| H51 | H | 0.6046 | 0.4655 | 0.3711 | 0.01267 | Uiso | 1.00 | 0.097464 |
| H52 | H | 0.4413 | 0.6295 | 0.5267 | 0.01267 | Uiso | 1.00 | 0.103572 |
| H53 | H | 0.1505 | 0.8294 | 0.1732 | 0.01267 | Uiso | 1.00 | 0.113322 |
| H54 | H | 0.0896 | 0.7591 | 0.2109 | 0.01267 | Uiso | 1.00 | 0.106928 |
| H55 | H | 0.8318 | 0.7693 | 0.1265 | 0.01267 | Uiso | 1.00 | 0.121771 |
| H56 | H | 0.8926 | 0.8395 | 0.0889 | 0.01267 | Uiso | 1.00 | 0.118610 |
| H57 | H | 0.9629 | 0.7232 | 0.2612 | 0.01267 | Uiso | 1.00 | 0.112331 |
| H58 | H | 0.9216 | 0.6498 | 0.298  | 0.01267 | Uiso | 1.00 | 0.121445 |
| H59 | H | 0.8195 | 0.6132 | 0.1752 | 0.01267 | Uiso | 1.00 | 0.126802 |
| H60 | H | 0.8609 | 0.6865 | 0.1383 | 0.01267 | Uiso | 1.00 | 0.126208 |
| H61 | H | 0.262  | 0.7939 | 0.5257 | 0.01267 | Uiso | 1.00 | 0.126484 |

|      |   |        |        |        |         |      |      |          |
|------|---|--------|--------|--------|---------|------|------|----------|
| H62  | H | 0.1045 | 0.8439 | 0.5801 | 0.01267 | Uiso | 1.00 | 0.128226 |
| H63  | H | 0.2712 | 0.7921 | 0.6931 | 0.01267 | Uiso | 1.00 | 0.116043 |
| H64  | H | 0.4289 | 0.742  | 0.6386 | 0.01267 | Uiso | 1.00 | 0.120942 |
| H65  | H | 0.6102 | 0.5913 | 0.6347 | 0.01267 | Uiso | 1.00 | 0.347254 |
| H66  | H | 0.5686 | 0.6327 | 0.6017 | 0.01267 | Uiso | 1.00 | 0.355073 |
| H67  | H | 0.9299 | 0.4655 | 0.6289 | 0.01267 | Uiso | 1.00 | 0.098117 |
| H68  | H | 0.9292 | 0.6295 | 0.4733 | 0.01267 | Uiso | 1.00 | 0.104038 |
| H69  | H | 0.0201 | 0.8294 | 0.8268 | 0.01267 | Uiso | 1.00 | 0.113637 |
| H70  | H | 0.1513 | 0.7591 | 0.7891 | 0.01267 | Uiso | 1.00 | 0.106402 |
| H71  | H | 0.3989 | 0.7693 | 0.8735 | 0.01267 | Uiso | 1.00 | 0.122446 |
| H72  | H | 0.2679 | 0.8395 | 0.9111 | 0.01267 | Uiso | 1.00 | 0.120333 |
| H73  | H | 0.3139 | 0.7232 | 0.7388 | 0.01267 | Uiso | 1.00 | 0.113267 |
| H74  | H | 0.4286 | 0.6498 | 0.702  | 0.01267 | Uiso | 1.00 | 0.121270 |
| H75  | H | 0.5673 | 0.6132 | 0.8248 | 0.01267 | Uiso | 1.00 | 0.128086 |
| H76  | H | 0.4526 | 0.6865 | 0.8617 | 0.01267 | Uiso | 1.00 | 0.126129 |
| H77  | H | 0.9441 | 0.7939 | 0.4743 | 0.01267 | Uiso | 1.00 | 0.125849 |
| H78  | H | 0.0516 | 0.8439 | 0.4199 | 0.01267 | Uiso | 1.00 | 0.127332 |
| H79  | H | 0.9367 | 0.7921 | 0.3069 | 0.01267 | Uiso | 1.00 | 0.116129 |
| H80  | H | 0.8291 | 0.742  | 0.3614 | 0.01267 | Uiso | 1.00 | 0.120060 |
| H81  | H | 0.8362 | 0.4087 | 0.3653 | 0.01267 | Uiso | 1.00 | 0.347792 |
| H82  | H | 0.803  | 0.3673 | 0.3983 | 0.01267 | Uiso | 1.00 | 0.347079 |
| H83  | H | 0.0243 | 0.5345 | 0.3711 | 0.01267 | Uiso | 1.00 | 0.098300 |
| H84  | H | 0.032  | 0.3705 | 0.5267 | 0.01267 | Uiso | 1.00 | 0.103610 |
| H85  | H | 0.6763 | 0.1706 | 0.1732 | 0.01267 | Uiso | 1.00 | 0.114064 |
| H86  | H | 0.6995 | 0.2409 | 0.2109 | 0.01267 | Uiso | 1.00 | 0.106795 |
| H87  | H | 0.0417 | 0.2307 | 0.1265 | 0.01267 | Uiso | 1.00 | 0.122819 |
| H88  | H | 0.0185 | 0.1605 | 0.0889 | 0.01267 | Uiso | 1.00 | 0.119654 |
| H89  | H | 0.7759 | 0.2768 | 0.2612 | 0.01267 | Uiso | 1.00 | 0.113507 |
| H90  | H | 0.7804 | 0.3502 | 0.298  | 0.01267 | Uiso | 1.00 | 0.121063 |
| H91  | H | 0.0053 | 0.3868 | 0.1752 | 0.01267 | Uiso | 1.00 | 0.126435 |
| H92  | H | 0.0008 | 0.3135 | 0.1383 | 0.01267 | Uiso | 1.00 | 0.126727 |
| H93  | H | 0.2123 | 0.2061 | 0.5257 | 0.01267 | Uiso | 1.00 | 0.126976 |
| H94  | H | 0.3154 | 0.1561 | 0.5801 | 0.01267 | Uiso | 1.00 | 0.128739 |
| H95  | H | 0.0357 | 0.2079 | 0.6931 | 0.01267 | Uiso | 1.00 | 0.115920 |
| H96  | H | 0.9325 | 0.258  | 0.6386 | 0.01267 | Uiso | 1.00 | 0.121181 |
| H97  | H | 0.4515 | 0.1347 | 0.9087 | 0.01267 | Uiso | 1.00 | 0.347922 |
| H98  | H | 0.4513 | 0.1017 | 0.8673 | 0.01267 | Uiso | 1.00 | 0.349750 |
| H99  | H | 0.6454 | 0.1289 | 0.0345 | 0.01267 | Uiso | 1.00 | 0.097149 |
| H100 | H | 0.8087 | 0.9733 | 0.8705 | 0.01267 | Uiso | 1.00 | 0.103475 |
| H101 | H | 0.0995 | 0.3268 | 0.6706 | 0.01267 | Uiso | 1.00 | 0.113237 |
| H102 | H | 0.1604 | 0.2891 | 0.7409 | 0.01267 | Uiso | 1.00 | 0.106640 |
| H103 | H | 0.4182 | 0.3735 | 0.7307 | 0.01267 | Uiso | 1.00 | 0.121893 |
| H104 | H | 0.3574 | 0.4111 | 0.6605 | 0.01267 | Uiso | 1.00 | 0.118775 |
| H105 | H | 0.2871 | 0.2388 | 0.7768 | 0.01267 | Uiso | 1.00 | 0.112558 |
| H106 | H | 0.3284 | 0.202  | 0.8502 | 0.01267 | Uiso | 1.00 | 0.121492 |
| H107 | H | 0.4305 | 0.3248 | 0.8868 | 0.01267 | Uiso | 1.00 | 0.126626 |
| H108 | H | 0.3891 | 0.3617 | 0.8135 | 0.01267 | Uiso | 1.00 | 0.126240 |
| H109 | H | 0.988  | 0.9743 | 0.7061 | 0.01267 | Uiso | 1.00 | 0.126263 |
| H110 | H | 0.1455 | 0.9199 | 0.6561 | 0.01267 | Uiso | 1.00 | 0.128471 |
| H111 | H | 0.9788 | 0.8069 | 0.7079 | 0.01267 | Uiso | 1.00 | 0.116182 |
| H112 | H | 0.8211 | 0.8614 | 0.758  | 0.01267 | Uiso | 1.00 | 0.120432 |
| H113 | H | 0.4949 | 0.8653 | 0.0913 | 0.01267 | Uiso | 1.00 | 0.348216 |

|      |   |        |        |        |         |      |      |           |
|------|---|--------|--------|--------|---------|------|------|-----------|
| H114 | H | 0.4203 | 0.8983 | 0.1327 | 0.01267 | Uiso | 1.00 | 0.348074  |
| H115 | H | 0.8088 | 0.8711 | 0.9655 | 0.01267 | Uiso | 1.00 | 0.098754  |
| H116 | H | 0.6525 | 0.0267 | 0.1295 | 0.01267 | Uiso | 1.00 | 0.103877  |
| H117 | H | 0.0969 | 0.6732 | 0.3294 | 0.01267 | Uiso | 1.00 | 0.113075  |
| H118 | H | 0.1904 | 0.7109 | 0.2591 | 0.01267 | Uiso | 1.00 | 0.106344  |
| H119 | H | 0.5224 | 0.6265 | 0.2693 | 0.01267 | Uiso | 1.00 | 0.123095  |
| H120 | H | 0.429  | 0.5889 | 0.3395 | 0.01267 | Uiso | 1.00 | 0.118909  |
| H121 | H | 0.3027 | 0.7612 | 0.2232 | 0.01267 | Uiso | 1.00 | 0.111973  |
| H122 | H | 0.3806 | 0.798  | 0.1498 | 0.01267 | Uiso | 1.00 | 0.121008  |
| H123 | H | 0.6421 | 0.6752 | 0.1132 | 0.01267 | Uiso | 1.00 | 0.127575  |
| H124 | H | 0.5643 | 0.6383 | 0.1865 | 0.01267 | Uiso | 1.00 | 0.126197  |
| H125 | H | 0.6684 | 0.0257 | 0.2939 | 0.01267 | Uiso | 1.00 | 0.126718  |
| H126 | H | 0.7215 | 0.0801 | 0.3439 | 0.01267 | Uiso | 1.00 | 0.127048  |
| H127 | H | 0.4936 | 0.1931 | 0.2921 | 0.01267 | Uiso | 1.00 | 0.116468  |
| H128 | H | 0.4405 | 0.1386 | 0.242  | 0.01267 | Uiso | 1.00 | 0.120441  |
| C1   | C | 0.2348 | 0.1112 | 0.9944 | 0.01267 | Uiso | 1.00 | 0.198289  |
| C2   | C | 0.2148 | 0.0541 | 0.0455 | 0.01267 | Uiso | 1.00 | 0.334744  |
| C3   | C | 0.2346 | 0.0007 | 0.1105 | 0.01267 | Uiso | 1.00 | 0.244714  |
| C4   | C | 0.338  | 0.0733 | 0.0953 | 0.01267 | Uiso | 1.00 | 0.373931  |
| C5   | C | 0.2855 | 0.0851 | 0.0589 | 0.01267 | Uiso | 1.00 | -0.049856 |
| C6   | C | 0.4285 | 0.3983 | 0.3853 | 0.01267 | Uiso | 1.00 | 0.578534  |
| C7   | C | 0.5005 | 0.3361 | 0.3173 | 0.01267 | Uiso | 1.00 | -0.109285 |
| C8   | C | 0.4866 | 0.3136 | 0.2752 | 0.01267 | Uiso | 1.00 | -0.152477 |
| C9   | C | 0.3771 | 0.3276 | 0.2572 | 0.01267 | Uiso | 1.00 | 0.081091  |
| C10  | C | 0.2816 | 0.3641 | 0.2813 | 0.01267 | Uiso | 1.00 | -0.134889 |
| C11  | C | 0.2954 | 0.3867 | 0.3235 | 0.01267 | Uiso | 1.00 | -0.099905 |
| C12  | C | 0.4049 | 0.3726 | 0.3414 | 0.01267 | Uiso | 1.00 | -0.017685 |
| C13  | C | 0.4281 | 0.2561 | 0.2011 | 0.01267 | Uiso | 1.00 | -0.150679 |
| C14  | C | 0.4255 | 0.2339 | 0.1571 | 0.01267 | Uiso | 1.00 | -0.107775 |
| C15  | C | 0.3568 | 0.2596 | 0.1242 | 0.01267 | Uiso | 1.00 | -0.014220 |
| C16  | C | 0.2907 | 0.3076 | 0.1352 | 0.01267 | Uiso | 1.00 | -0.103890 |
| C17  | C | 0.2934 | 0.3297 | 0.1791 | 0.01267 | Uiso | 1.00 | -0.135842 |
| C18  | C | 0.362  | 0.304  | 0.2122 | 0.01267 | Uiso | 1.00 | 0.084251  |
| C19  | C | 0.3542 | 0.2364 | 0.0754 | 0.01267 | Uiso | 1.00 | 0.573090  |
| C20  | C | 0.2636 | 0.9539 | 0.2305 | 0.01267 | Uiso | 1.00 | 0.581725  |
| C21  | C | 0.0728 | 0.9408 | 0.2936 | 0.01267 | Uiso | 1.00 | -0.090775 |
| C22  | C | 0.0113 | 0.9081 | 0.3235 | 0.01267 | Uiso | 1.00 | -0.155284 |
| C23  | C | 0.0645 | 0.858  | 0.323  | 0.01267 | Uiso | 1.00 | 0.088127  |
| C24  | C | 0.1785 | 0.8405 | 0.2925 | 0.01267 | Uiso | 1.00 | -0.156287 |
| C25  | C | 0.2407 | 0.8731 | 0.2625 | 0.01267 | Uiso | 1.00 | -0.109924 |
| C26  | C | 0.1878 | 0.9232 | 0.263  | 0.01267 | Uiso | 1.00 | -0.026972 |
| C27  | C | 0.3404 | 0.8888 | 0.0056 | 0.01267 | Uiso | 1.00 | 0.197473  |
| C28  | C | 0.3144 | 0.9459 | 0.9545 | 0.01267 | Uiso | 1.00 | 0.338370  |
| C29  | C | 0.3458 | 0.9993 | 0.8895 | 0.01267 | Uiso | 1.00 | 0.243336  |
| C30  | C | 0.5066 | 0.9267 | 0.9047 | 0.01267 | Uiso | 1.00 | 0.372588  |
| C31  | C | 0.4295 | 0.9149 | 0.9411 | 0.01267 | Uiso | 1.00 | -0.051195 |
| C32  | C | 0.2121 | 0.6017 | 0.6147 | 0.01267 | Uiso | 1.00 | 0.577460  |
| C33  | C | 0.1539 | 0.6639 | 0.6827 | 0.01267 | Uiso | 1.00 | -0.107879 |
| C34  | C | 0.0754 | 0.6864 | 0.7248 | 0.01267 | Uiso | 1.00 | -0.153227 |
| C35  | C | 0.9619 | 0.6724 | 0.7428 | 0.01267 | Uiso | 1.00 | 0.080688  |
| C36  | C | 0.927  | 0.6359 | 0.7187 | 0.01267 | Uiso | 1.00 | -0.133515 |
| C37  | C | 0.0056 | 0.6133 | 0.6765 | 0.01267 | Uiso | 1.00 | -0.100904 |

|     |   |        |        |        |         |      |      |           |
|-----|---|--------|--------|--------|---------|------|------|-----------|
| C38 | C | 0.1189 | 0.6274 | 0.6586 | 0.01267 | Uiso | 1.00 | -0.018631 |
| C39 | C | 0.8853 | 0.7439 | 0.7989 | 0.01267 | Uiso | 1.00 | -0.149238 |
| C40 | C | 0.8165 | 0.7661 | 0.8429 | 0.01267 | Uiso | 1.00 | -0.107979 |
| C41 | C | 0.7406 | 0.7404 | 0.8758 | 0.01267 | Uiso | 1.00 | -0.013951 |
| C42 | C | 0.7335 | 0.6924 | 0.8648 | 0.01267 | Uiso | 1.00 | -0.105272 |
| C43 | C | 0.8022 | 0.6703 | 0.8209 | 0.01267 | Uiso | 1.00 | -0.135833 |
| C44 | C | 0.8782 | 0.696  | 0.7878 | 0.01267 | Uiso | 1.00 | 0.084537  |
| C45 | C | 0.666  | 0.7636 | 0.9246 | 0.01267 | Uiso | 1.00 | 0.572560  |
| C46 | C | 0.448  | 0.0461 | 0.7695 | 0.01267 | Uiso | 1.00 | 0.578405  |
| C47 | C | 0.3072 | 0.0592 | 0.7064 | 0.01267 | Uiso | 1.00 | -0.087325 |
| C48 | C | 0.2429 | 0.0919 | 0.6765 | 0.01267 | Uiso | 1.00 | -0.154857 |
| C49 | C | 0.2455 | 0.142  | 0.677  | 0.01267 | Uiso | 1.00 | 0.088379  |
| C50 | C | 0.3115 | 0.1595 | 0.7075 | 0.01267 | Uiso | 1.00 | -0.156375 |
| C51 | C | 0.3763 | 0.1269 | 0.7375 | 0.01267 | Uiso | 1.00 | -0.109369 |
| C52 | C | 0.374  | 0.0768 | 0.737  | 0.01267 | Uiso | 1.00 | -0.025469 |
| C53 | C | 0.4792 | 0.5056 | 0.6112 | 0.01267 | Uiso | 1.00 | 0.197431  |
| C54 | C | 0.5103 | 0.4545 | 0.5541 | 0.01267 | Uiso | 1.00 | 0.335139  |
| C55 | C | 0.5951 | 0.3895 | 0.5007 | 0.01267 | Uiso | 1.00 | 0.246368  |
| C56 | C | 0.6833 | 0.4047 | 0.5733 | 0.01267 | Uiso | 1.00 | 0.374722  |
| C57 | C | 0.5944 | 0.4411 | 0.5851 | 0.01267 | Uiso | 1.00 | -0.050665 |
| C58 | C | 0.0638 | 0.1147 | 0.8983 | 0.01267 | Uiso | 1.00 | 0.576986  |
| C59 | C | 0.0678 | 0.1827 | 0.8361 | 0.01267 | Uiso | 1.00 | -0.106835 |
| C60 | C | 0.0118 | 0.2248 | 0.8136 | 0.01267 | Uiso | 1.00 | -0.154010 |
| C61 | C | 0.8843 | 0.2428 | 0.8276 | 0.01267 | Uiso | 1.00 | 0.080989  |
| C62 | C | 0.8129 | 0.2187 | 0.8641 | 0.01267 | Uiso | 1.00 | -0.134877 |
| C63 | C | 0.8689 | 0.1765 | 0.8867 | 0.01267 | Uiso | 1.00 | -0.098616 |
| C64 | C | 0.9963 | 0.1586 | 0.8726 | 0.01267 | Uiso | 1.00 | -0.018007 |
| C65 | C | 0.8792 | 0.2989 | 0.7561 | 0.01267 | Uiso | 1.00 | -0.147128 |
| C66 | C | 0.8326 | 0.3429 | 0.7339 | 0.01267 | Uiso | 1.00 | -0.109429 |
| C67 | C | 0.731  | 0.3758 | 0.7596 | 0.01267 | Uiso | 1.00 | -0.011313 |
| C68 | C | 0.6759 | 0.3648 | 0.8076 | 0.01267 | Uiso | 1.00 | -0.105298 |
| C69 | C | 0.7225 | 0.3209 | 0.8297 | 0.01267 | Uiso | 1.00 | -0.136177 |
| C70 | C | 0.8242 | 0.2878 | 0.804  | 0.01267 | Uiso | 1.00 | 0.085180  |
| C71 | C | 0.6796 | 0.4246 | 0.7364 | 0.01267 | Uiso | 1.00 | 0.571940  |
| C72 | C | 0.7441 | 0.2695 | 0.4539 | 0.01267 | Uiso | 1.00 | 0.579115  |
| C73 | C | 0.6164 | 0.2064 | 0.4408 | 0.01267 | Uiso | 1.00 | -0.090801 |
| C74 | C | 0.5848 | 0.1765 | 0.4081 | 0.01267 | Uiso | 1.00 | -0.153377 |
| C75 | C | 0.6375 | 0.177  | 0.358  | 0.01267 | Uiso | 1.00 | 0.089099  |
| C76 | C | 0.721  | 0.2075 | 0.3405 | 0.01267 | Uiso | 1.00 | -0.159064 |
| C77 | C | 0.7532 | 0.2375 | 0.3731 | 0.01267 | Uiso | 1.00 | -0.108407 |
| C78 | C | 0.7008 | 0.237  | 0.4232 | 0.01267 | Uiso | 1.00 | -0.026564 |
| C79 | C | 0.596  | 0.4944 | 0.3888 | 0.01267 | Uiso | 1.00 | 0.199610  |
| C80 | C | 0.5189 | 0.5455 | 0.4459 | 0.01267 | Uiso | 1.00 | 0.336130  |
| C81 | C | 0.4853 | 0.6105 | 0.4993 | 0.01267 | Uiso | 1.00 | 0.245967  |
| C82 | C | 0.6613 | 0.5953 | 0.4267 | 0.01267 | Uiso | 1.00 | 0.374052  |
| C83 | C | 0.6206 | 0.5589 | 0.4149 | 0.01267 | Uiso | 1.00 | -0.050491 |
| C84 | C | 0.0768 | 0.8853 | 0.1017 | 0.01267 | Uiso | 1.00 | 0.576763  |
| C85 | C | 0.0866 | 0.8173 | 0.1639 | 0.01267 | Uiso | 1.00 | -0.106020 |
| C86 | C | 0.0502 | 0.7752 | 0.1864 | 0.01267 | Uiso | 1.00 | -0.154972 |
| C87 | C | 0.9547 | 0.7572 | 0.1724 | 0.01267 | Uiso | 1.00 | 0.081164  |
| C88 | C | 0.8957 | 0.7813 | 0.1359 | 0.01267 | Uiso | 1.00 | -0.134483 |
| C89 | C | 0.9321 | 0.8235 | 0.1133 | 0.01267 | Uiso | 1.00 | -0.097606 |

|      |   |        |        |        |         |      |      |           |
|------|---|--------|--------|--------|---------|------|------|-----------|
| C90  | C | 0.0275 | 0.8414 | 0.1274 | 0.01267 | Uiso | 1.00 | -0.018493 |
| C91  | C | 0.9342 | 0.7011 | 0.2439 | 0.01267 | Uiso | 1.00 | -0.148575 |
| C92  | C | 0.9094 | 0.6571 | 0.2661 | 0.01267 | Uiso | 1.00 | -0.108691 |
| C93  | C | 0.8664 | 0.6242 | 0.2404 | 0.01267 | Uiso | 1.00 | -0.013620 |
| C94  | C | 0.8483 | 0.6352 | 0.1924 | 0.01267 | Uiso | 1.00 | -0.103529 |
| C95  | C | 0.8731 | 0.6791 | 0.1703 | 0.01267 | Uiso | 1.00 | -0.136879 |
| C96  | C | 0.916  | 0.7122 | 0.196  | 0.01267 | Uiso | 1.00 | 0.085581  |
| C97  | C | 0.8406 | 0.5754 | 0.2636 | 0.01267 | Uiso | 1.00 | 0.573089  |
| C98  | C | 0.4675 | 0.7305 | 0.5461 | 0.01267 | Uiso | 1.00 | 0.578800  |
| C99  | C | 0.2636 | 0.7936 | 0.5592 | 0.01267 | Uiso | 1.00 | -0.089321 |
| C100 | C | 0.1694 | 0.8235 | 0.5919 | 0.01267 | Uiso | 1.00 | -0.154045 |
| C101 | C | 0.1725 | 0.823  | 0.642  | 0.01267 | Uiso | 1.00 | 0.087713  |
| C102 | C | 0.269  | 0.7925 | 0.6595 | 0.01267 | Uiso | 1.00 | -0.157123 |
| C103 | C | 0.3638 | 0.7625 | 0.6269 | 0.01267 | Uiso | 1.00 | -0.108570 |
| C104 | C | 0.361  | 0.763  | 0.5768 | 0.01267 | Uiso | 1.00 | -0.027419 |
| C105 | C | 0.9096 | 0.4944 | 0.6112 | 0.01267 | Uiso | 1.00 | 0.197831  |
| C106 | C | 0.9356 | 0.5455 | 0.5541 | 0.01267 | Uiso | 1.00 | 0.338388  |
| C107 | C | 0.9042 | 0.6105 | 0.5007 | 0.01267 | Uiso | 1.00 | 0.243156  |
| C108 | C | 0.7434 | 0.5953 | 0.5733 | 0.01267 | Uiso | 1.00 | 0.372265  |
| C109 | C | 0.8205 | 0.5589 | 0.5851 | 0.01267 | Uiso | 1.00 | -0.051483 |
| C110 | C | 0.0379 | 0.8853 | 0.8983 | 0.01267 | Uiso | 1.00 | 0.577856  |
| C111 | C | 0.0961 | 0.8173 | 0.8361 | 0.01267 | Uiso | 1.00 | -0.108053 |
| C112 | C | 0.1746 | 0.7752 | 0.8136 | 0.01267 | Uiso | 1.00 | -0.153050 |
| C113 | C | 0.2881 | 0.7572 | 0.8276 | 0.01267 | Uiso | 1.00 | 0.080983  |
| C114 | C | 0.323  | 0.7813 | 0.8641 | 0.01267 | Uiso | 1.00 | -0.133758 |
| C115 | C | 0.2444 | 0.8235 | 0.8867 | 0.01267 | Uiso | 1.00 | -0.100715 |
| C116 | C | 0.1311 | 0.8414 | 0.8726 | 0.01267 | Uiso | 1.00 | -0.018729 |
| C117 | C | 0.3647 | 0.7011 | 0.7561 | 0.01267 | Uiso | 1.00 | -0.148760 |
| C118 | C | 0.4335 | 0.6571 | 0.7339 | 0.01267 | Uiso | 1.00 | -0.108018 |
| C119 | C | 0.5094 | 0.6242 | 0.7596 | 0.01267 | Uiso | 1.00 | -0.013150 |
| C120 | C | 0.5165 | 0.6352 | 0.8076 | 0.01267 | Uiso | 1.00 | -0.105477 |
| C121 | C | 0.4478 | 0.6791 | 0.8297 | 0.01267 | Uiso | 1.00 | -0.136078 |
| C122 | C | 0.3718 | 0.7122 | 0.804  | 0.01267 | Uiso | 1.00 | 0.084254  |
| C123 | C | 0.584  | 0.5754 | 0.7364 | 0.01267 | Uiso | 1.00 | 0.572039  |
| C124 | C | 0.802  | 0.7305 | 0.4539 | 0.01267 | Uiso | 1.00 | 0.580879  |
| C125 | C | 0.9428 | 0.7936 | 0.4408 | 0.01267 | Uiso | 1.00 | -0.089491 |
| C126 | C | 0.0071 | 0.8235 | 0.4081 | 0.01267 | Uiso | 1.00 | -0.154763 |
| C127 | C | 0.0045 | 0.823  | 0.358  | 0.01267 | Uiso | 1.00 | 0.087373  |
| C128 | C | 0.9385 | 0.7925 | 0.3405 | 0.01267 | Uiso | 1.00 | -0.156494 |
| C129 | C | 0.8737 | 0.7625 | 0.3731 | 0.01267 | Uiso | 1.00 | -0.108417 |
| C130 | C | 0.876  | 0.763  | 0.4232 | 0.01267 | Uiso | 1.00 | -0.026916 |
| C131 | C | 0.0152 | 0.5056 | 0.3888 | 0.01267 | Uiso | 1.00 | 0.198234  |
| C132 | C | 0.0352 | 0.4545 | 0.4459 | 0.01267 | Uiso | 1.00 | 0.334816  |
| C133 | C | 0.0154 | 0.3895 | 0.4993 | 0.01267 | Uiso | 1.00 | 0.244642  |
| C134 | C | 0.912  | 0.4047 | 0.4267 | 0.01267 | Uiso | 1.00 | 0.373956  |
| C135 | C | 0.9645 | 0.4411 | 0.4149 | 0.01267 | Uiso | 1.00 | -0.049901 |
| C136 | C | 0.8215 | 0.1147 | 0.1017 | 0.01267 | Uiso | 1.00 | 0.578398  |
| C137 | C | 0.7495 | 0.1827 | 0.1639 | 0.01267 | Uiso | 1.00 | -0.108680 |
| C138 | C | 0.7634 | 0.2248 | 0.1864 | 0.01267 | Uiso | 1.00 | -0.152180 |
| C139 | C | 0.8729 | 0.2428 | 0.1724 | 0.01267 | Uiso | 1.00 | 0.080980  |
| C140 | C | 0.9684 | 0.2187 | 0.1359 | 0.01267 | Uiso | 1.00 | -0.134219 |
| C141 | C | 0.9546 | 0.1765 | 0.1133 | 0.01267 | Uiso | 1.00 | -0.100094 |

|      |   |        |        |        |         |      |      |           |
|------|---|--------|--------|--------|---------|------|------|-----------|
| C142 | C | 0.8451 | 0.1586 | 0.1274 | 0.01267 | Uiso | 1.00 | -0.016751 |
| C143 | C | 0.8219 | 0.2989 | 0.2439 | 0.01267 | Uiso | 1.00 | -0.150463 |
| C144 | C | 0.8245 | 0.3429 | 0.2661 | 0.01267 | Uiso | 1.00 | -0.107516 |
| C145 | C | 0.8932 | 0.3758 | 0.2404 | 0.01267 | Uiso | 1.00 | -0.013669 |
| C146 | C | 0.9593 | 0.3648 | 0.1924 | 0.01267 | Uiso | 1.00 | -0.103540 |
| C147 | C | 0.9566 | 0.3209 | 0.1703 | 0.01267 | Uiso | 1.00 | -0.135587 |
| C148 | C | 0.888  | 0.2878 | 0.196  | 0.01267 | Uiso | 1.00 | 0.084663  |
| C149 | C | 0.8958 | 0.4246 | 0.2636 | 0.01267 | Uiso | 1.00 | 0.573485  |
| C150 | C | 0.9864 | 0.2695 | 0.5461 | 0.01267 | Uiso | 1.00 | 0.581056  |
| C151 | C | 0.1772 | 0.2064 | 0.5592 | 0.01267 | Uiso | 1.00 | -0.090231 |
| C152 | C | 0.2387 | 0.1765 | 0.5919 | 0.01267 | Uiso | 1.00 | -0.154472 |
| C153 | C | 0.1855 | 0.177  | 0.642  | 0.01267 | Uiso | 1.00 | 0.088733  |
| C154 | C | 0.0715 | 0.2075 | 0.6595 | 0.01267 | Uiso | 1.00 | -0.155777 |
| C155 | C | 0.0093 | 0.2375 | 0.6269 | 0.01267 | Uiso | 1.00 | -0.109757 |
| C156 | C | 0.0622 | 0.237  | 0.5768 | 0.01267 | Uiso | 1.00 | -0.025932 |
| C157 | C | 0.654  | 0.1112 | 0.0056 | 0.01267 | Uiso | 1.00 | 0.198990  |
| C158 | C | 0.7311 | 0.0541 | 0.9545 | 0.01267 | Uiso | 1.00 | 0.336501  |
| C159 | C | 0.7647 | 0.0007 | 0.8895 | 0.01267 | Uiso | 1.00 | 0.246489  |
| C160 | C | 0.5887 | 0.0733 | 0.9047 | 0.01267 | Uiso | 1.00 | 0.374623  |
| C161 | C | 0.6294 | 0.0851 | 0.9411 | 0.01267 | Uiso | 1.00 | -0.050773 |
| C162 | C | 0.1732 | 0.3983 | 0.6147 | 0.01267 | Uiso | 1.00 | 0.576844  |
| C163 | C | 0.1634 | 0.3361 | 0.6827 | 0.01267 | Uiso | 1.00 | -0.106638 |
| C164 | C | 0.1998 | 0.3136 | 0.7248 | 0.01267 | Uiso | 1.00 | -0.154556 |
| C165 | C | 0.2953 | 0.3276 | 0.7428 | 0.01267 | Uiso | 1.00 | 0.081207  |
| C166 | C | 0.3543 | 0.3641 | 0.7187 | 0.01267 | Uiso | 1.00 | -0.134992 |
| C167 | C | 0.3179 | 0.3867 | 0.6765 | 0.01267 | Uiso | 1.00 | -0.097149 |
| C168 | C | 0.2225 | 0.3726 | 0.6586 | 0.01267 | Uiso | 1.00 | -0.018015 |
| C169 | C | 0.3158 | 0.2561 | 0.7989 | 0.01267 | Uiso | 1.00 | -0.148380 |
| C170 | C | 0.3406 | 0.2339 | 0.8429 | 0.01267 | Uiso | 1.00 | -0.108881 |
| C171 | C | 0.3836 | 0.2596 | 0.8758 | 0.01267 | Uiso | 1.00 | -0.013277 |
| C172 | C | 0.4017 | 0.3076 | 0.8648 | 0.01267 | Uiso | 1.00 | -0.103332 |
| C173 | C | 0.3769 | 0.3297 | 0.8209 | 0.01267 | Uiso | 1.00 | -0.136900 |
| C174 | C | 0.334  | 0.304  | 0.7878 | 0.01267 | Uiso | 1.00 | 0.085728  |
| C175 | C | 0.4094 | 0.2364 | 0.9246 | 0.01267 | Uiso | 1.00 | 0.573018  |
| C176 | C | 0.7825 | 0.9539 | 0.7695 | 0.01267 | Uiso | 1.00 | 0.577242  |
| C177 | C | 0.9864 | 0.9408 | 0.7064 | 0.01267 | Uiso | 1.00 | -0.087842 |
| C178 | C | 0.0806 | 0.9081 | 0.6765 | 0.01267 | Uiso | 1.00 | -0.154154 |
| C179 | C | 0.0775 | 0.858  | 0.677  | 0.01267 | Uiso | 1.00 | 0.089018  |
| C180 | C | 0.981  | 0.8405 | 0.7075 | 0.01267 | Uiso | 1.00 | -0.157870 |
| C181 | C | 0.8862 | 0.8731 | 0.7375 | 0.01267 | Uiso | 1.00 | -0.109421 |
| C182 | C | 0.889  | 0.9232 | 0.737  | 0.01267 | Uiso | 1.00 | -0.026657 |
| C183 | C | 0.7708 | 0.8888 | 0.9944 | 0.01267 | Uiso | 1.00 | 0.197386  |
| C184 | C | 0.7397 | 0.9459 | 0.0455 | 0.01267 | Uiso | 1.00 | 0.335086  |
| C185 | C | 0.6549 | 0.9993 | 0.1105 | 0.01267 | Uiso | 1.00 | 0.246127  |
| C186 | C | 0.5667 | 0.9267 | 0.0953 | 0.01267 | Uiso | 1.00 | 0.374290  |
| C187 | C | 0.6556 | 0.9149 | 0.0589 | 0.01267 | Uiso | 1.00 | -0.050274 |
| C188 | C | 0.1862 | 0.6017 | 0.3853 | 0.01267 | Uiso | 1.00 | 0.577424  |
| C189 | C | 0.1822 | 0.6639 | 0.3173 | 0.01267 | Uiso | 1.00 | -0.106673 |
| C190 | C | 0.2382 | 0.6864 | 0.2752 | 0.01267 | Uiso | 1.00 | -0.153852 |
| C191 | C | 0.3657 | 0.6724 | 0.2572 | 0.01267 | Uiso | 1.00 | 0.081230  |
| C192 | C | 0.4371 | 0.6359 | 0.2813 | 0.01267 | Uiso | 1.00 | -0.135079 |
| C193 | C | 0.3811 | 0.6133 | 0.3235 | 0.01267 | Uiso | 1.00 | -0.098754 |

|      |   |         |         |         |         |         |      |           |           |
|------|---|---------|---------|---------|---------|---------|------|-----------|-----------|
| C194 | C | 0.2537  | 0.6274  | 0.3414  | 0.01267 | Uiso    | 1.00 | -0.018170 |           |
| C195 | C | 0.3708  | 0.7439  | 0.2011  | 0.01267 | Uiso    | 1.00 | -0.147201 |           |
| C196 | C | 0.4174  | 0.7661  | 0.1571  | 0.01267 | Uiso    | 1.00 | -0.109377 |           |
| C197 | C | 0.519   | 0.7404  | 0.1242  | 0.01267 | Uiso    | 1.00 | -0.012284 |           |
| C198 | C | 0.5741  | 0.6924  | 0.1352  | 0.01267 | Uiso    | 1.00 | -0.105440 |           |
| C199 | C | 0.5275  | 0.6703  | 0.1791  | 0.01267 | Uiso    | 1.00 | -0.135326 |           |
| C200 | C | 0.4258  | 0.696   | 0.2122  | 0.01267 | Uiso    | 1.00 | 0.084605  |           |
| C201 | C | 0.5704  | 0.7636  | 0.0754  | 0.01267 | Uiso    | 1.00 | 0.572262  |           |
| C202 | C | 0.5059  | 0.0461  | 0.2305  | 0.01267 | Uiso    | 1.00 | 0.579502  |           |
| C203 | C | 0.6336  | 0.0592  | 0.2936  | 0.01267 | Uiso    | 1.00 | -0.090978 |           |
| C204 | C | 0.6652  | 0.0919  | 0.3235  | 0.01267 | Uiso    | 1.00 | -0.153577 |           |
| C205 | C | 0.6125  | 0.142   | 0.323   | 0.01267 | Uiso    | 1.00 | 0.088315  |           |
| C206 | C | 0.529   | 0.1595  | 0.2925  | 0.01267 | Uiso    | 1.00 | -0.158939 |           |
| C207 | C | 0.4968  | 0.1269  | 0.2625  | 0.01267 | Uiso    | 1.00 | -0.108598 |           |
| C208 | C | 0.5492  | 0.0768  | 0.263   | 0.01267 | Uiso    | 1.00 | -0.027301 |           |
| N1   | N | 0.1832  | 0.0718  | 0.0058  | 0.01267 | Uiso    | 1.00 | -0.334058 |           |
| N2   | N | 0.1834  | 0.0129  | 0.0699  | 0.01267 | Uiso    | 1.00 | -0.369607 |           |
| N3   | N | 0.306   | 0.0273  | 0.1227  | 0.01267 | Uiso    | 1.00 | -0.368065 |           |
| N4   | N | 0.3041  | 0.1256  | 0.0272  | 0.01267 | Uiso    | 1.00 | -0.325870 |           |
| N5   | N | 0.40941 |         | 0.10799 | 0.10819 | 0.01267 | Uiso | 1.00      | -0.669926 |
| N6   | N | 0.2608  | 0.9282  | 0.9942  | 0.01267 | Uiso    | 1.00 | -0.335591 |           |
| N7   | N | 0.2662  | 0.9871  | 0.9301  | 0.01267 | Uiso    | 1.00 | -0.371439 |           |
| N8   | N | 0.456   | 0.9727  | 0.8773  | 0.01267 | Uiso    | 1.00 | -0.368543 |           |
| N9   | N | 0.4569  | 0.8744  | 0.9728  | 0.01267 | Uiso    | 1.00 | -0.325341 |           |
| N10  | N | 0.62559 |         | 0.89201 | 0.89181 | 0.01267 | Uiso | 1.00      | -0.671282 |
| N11  | N | 0.439   | 0.4942  | 0.5718  | 0.01267 | Uiso    | 1.00 | -0.333212 |           |
| N12  | N | 0.5033  | 0.4301  | 0.5129  | 0.01267 | Uiso    | 1.00 | -0.371283 |           |
| N13  | N | 0.6787  | 0.3773  | 0.5273  | 0.01267 | Uiso    | 1.00 | -0.370359 |           |
| N14  | N | 0.5813  | 0.4728  | 0.6256  | 0.01267 | Uiso    | 1.00 | -0.325522 |           |
| N15  | N | 0.7676  | 0.39181 |         | 0.60799 | 0.01267 | Uiso | 1.00      | -0.671558 |
| N16  | N | 0.505   | 0.5058  | 0.4282  | 0.01267 | Uiso    | 1.00 | -0.334488 |           |
| N17  | N | 0.4463  | 0.5699  | 0.4871  | 0.01267 | Uiso    | 1.00 | -0.370446 |           |
| N18  | N | 0.5833  | 0.6227  | 0.4727  | 0.01267 | Uiso    | 1.00 | -0.369444 |           |
| N19  | N | 0.6797  | 0.5272  | 0.3744  | 0.01267 | Uiso    | 1.00 | -0.326070 |           |
| N20  | N | 0.7674  | 0.60819 |         | 0.39201 | 0.01267 | Uiso | 1.00      | -0.673054 |
| N21  | N | 0.9892  | 0.5058  | 0.5718  | 0.01267 | Uiso    | 1.00 | -0.335178 |           |
| N22  | N | 0.9838  | 0.5699  | 0.5129  | 0.01267 | Uiso    | 1.00 | -0.370719 |           |
| N23  | N | 0.794   | 0.6227  | 0.5273  | 0.01267 | Uiso    | 1.00 | -0.366947 |           |
| N24  | N | 0.7931  | 0.5272  | 0.6256  | 0.01267 | Uiso    | 1.00 | -0.325313 |           |
| N25  | N | 0.62441 |         | 0.60819 | 0.60799 | 0.01267 | Uiso | 1.00      | -0.674896 |
| N26  | N | 0.0668  | 0.4942  | 0.4282  | 0.01267 | Uiso    | 1.00 | -0.333957 |           |
| N27  | N | 0.0666  | 0.4301  | 0.4871  | 0.01267 | Uiso    | 1.00 | -0.369985 |           |
| N28  | N | 0.944   | 0.3773  | 0.4727  | 0.01267 | Uiso    | 1.00 | -0.368917 |           |
| N29  | N | 0.9459  | 0.4728  | 0.3744  | 0.01267 | Uiso    | 1.00 | -0.325944 |           |
| N30  | N | 0.84059 |         | 0.39181 | 0.39201 | 0.01267 | Uiso | 1.00      | -0.670024 |
| N31  | N | 0.745   | 0.0718  | 0.9942  | 0.01267 | Uiso    | 1.00 | -0.334906 |           |
| N32  | N | 0.8037  | 0.0129  | 0.9301  | 0.01267 | Uiso    | 1.00 | -0.371272 |           |
| N33  | N | 0.6667  | 0.0273  | 0.8773  | 0.01267 | Uiso    | 1.00 | -0.371960 |           |
| N34  | N | 0.5703  | 0.1256  | 0.9728  | 0.01267 | Uiso    | 1.00 | -0.326564 |           |
| N35  | N | 0.4826  | 0.10799 |         | 0.89181 | 0.01267 | Uiso | 1.00      | -0.674253 |
| N36  | N | 0.811   | 0.9282  | 0.0058  | 0.01267 | Uiso    | 1.00 | -0.332850 |           |
| N37  | N | 0.7467  | 0.9871  | 0.0699  | 0.01267 | Uiso    | 1.00 | -0.371303 |           |

|     |   |        |         |        |         |         |      |           |           |
|-----|---|--------|---------|--------|---------|---------|------|-----------|-----------|
| N38 | N | 0.5713 | 0.9727  | 0.1227 | 0.01267 | Uiso    | 1.00 | -0.369718 |           |
| N39 | N | 0.6687 | 0.8744  | 0.0272 | 0.01267 | Uiso    | 1.00 | -0.325875 |           |
| N40 | N | 0.4824 | 0.89201 |        | 0.10819 | 0.01267 | Uiso | 1.00      | -0.671074 |
| O1  | O | 0.5315 | 0.3902  | 0.3934 | 0.01267 | Uiso    | 1.00 | -0.545306 |           |
| O2  | O | 0.3373 | 0.4302  | 0.4064 | 0.01267 | Uiso    | 1.00 | -0.548547 |           |
| O3  | O | 0.4413 | 0.1999  | 0.0597 | 0.01267 | Uiso    | 1.00 | -0.554134 |           |
| O4  | O | 0.2715 | 0.25    | 0.0532 | 0.01267 | Uiso    | 1.00 | -0.497440 |           |
| O5  | O | 0.3473 | 0.9397  | 0.1977 | 0.01267 | Uiso    | 1.00 | -0.502198 |           |
| O6  | O | 0.2367 | 0.9994  | 0.242  | 0.01267 | Uiso    | 1.00 | -0.509520 |           |
| O7  | O | 0.3151 | 0.6098  | 0.6066 | 0.01267 | Uiso    | 1.00 | -0.544738 |           |
| O8  | O | 0.1739 | 0.5698  | 0.5936 | 0.01267 | Uiso    | 1.00 | -0.547687 |           |
| O9  | O | 0.7009 | 0.8001  | 0.9403 | 0.01267 | Uiso    | 1.00 | -0.555067 |           |
| O10 | O | 0.5747 | 0.75    | 0.9468 | 0.01267 | Uiso    | 1.00 | -0.495953 |           |
| O11 | O | 0.4847 | 0.0603  | 0.8023 | 0.01267 | Uiso    | 1.00 | -0.489464 |           |
| O12 | O | 0.4781 | 0.0006  | 0.758  | 0.01267 | Uiso    | 1.00 | -0.521177 |           |
| O13 | O | 0.1749 | 0.1066  | 0.8902 | 0.01267 | Uiso    | 1.00 | -0.544312 |           |
| O14 | O | 0.9937 | 0.0936  | 0.9302 | 0.01267 | Uiso    | 1.00 | -0.548096 |           |
| O15 | O | 0.751  | 0.4403  | 0.6999 | 0.01267 | Uiso    | 1.00 | -0.557192 |           |
| O16 | O | 0.5747 | 0.4468  | 0.75   | 0.01267 | Uiso    | 1.00 | -0.493161 |           |
| O17 | O | 0.795  | 0.3023  | 0.4397 | 0.01267 | Uiso    | 1.00 | -0.499342 |           |
| O18 | O | 0.7287 | 0.258   | 0.4994 | 0.01267 | Uiso    | 1.00 | -0.512329 |           |
| O19 | O | 0.1717 | 0.8934  | 0.1098 | 0.01267 | Uiso    | 1.00 | -0.544490 |           |
| O20 | O | 0.0175 | 0.9064  | 0.0698 | 0.01267 | Uiso    | 1.00 | -0.547888 |           |
| O21 | O | 0.8912 | 0.5597  | 0.3001 | 0.01267 | Uiso    | 1.00 | -0.554369 |           |
| O22 | O | 0.7715 | 0.5532  | 0.25   | 0.01267 | Uiso    | 1.00 | -0.497137 |           |
| O23 | O | 0.537  | 0.6977  | 0.5603 | 0.01267 | Uiso    | 1.00 | -0.504972 |           |
| O24 | O | 0.4861 | 0.742   | 0.5006 | 0.01267 | Uiso    | 1.00 | -0.506836 |           |
| O25 | O | 0.9349 | 0.8934  | 0.8902 | 0.01267 | Uiso    | 1.00 | -0.545573 |           |
| O26 | O | 0.0761 | 0.9064  | 0.9302 | 0.01267 | Uiso    | 1.00 | -0.547718 |           |
| O27 | O | 0.5491 | 0.5597  | 0.6999 | 0.01267 | Uiso    | 1.00 | -0.558601 |           |
| O28 | O | 0.6753 | 0.5532  | 0.75   | 0.01267 | Uiso    | 1.00 | -0.492797 |           |
| O29 | O | 0.7653 | 0.6977  | 0.4397 | 0.01267 | Uiso    | 1.00 | -0.504270 |           |
| O30 | O | 0.7719 | 0.742   | 0.4994 | 0.01267 | Uiso    | 1.00 | -0.508182 |           |
| O31 | O | 0.7185 | 0.1066  | 0.1098 | 0.01267 | Uiso    | 1.00 | -0.545050 |           |
| O32 | O | 0.9127 | 0.0936  | 0.0698 | 0.01267 | Uiso    | 1.00 | -0.548340 |           |
| O33 | O | 0.8087 | 0.4403  | 0.3001 | 0.01267 | Uiso    | 1.00 | -0.554385 |           |
| O34 | O | 0.9785 | 0.4468  | 0.25   | 0.01267 | Uiso    | 1.00 | -0.497551 |           |
| O35 | O | 0.9027 | 0.3023  | 0.5603 | 0.01267 | Uiso    | 1.00 | -0.499298 |           |
| O36 | O | 0.0133 | 0.258   | 0.5006 | 0.01267 | Uiso    | 1.00 | -0.509606 |           |
| O37 | O | 0.0783 | 0.3902  | 0.6066 | 0.01267 | Uiso    | 1.00 | -0.545145 |           |
| O38 | O | 0.2325 | 0.4302  | 0.5936 | 0.01267 | Uiso    | 1.00 | -0.547817 |           |
| O39 | O | 0.3588 | 0.1999  | 0.9403 | 0.01267 | Uiso    | 1.00 | -0.554461 |           |
| O40 | O | 0.4785 | 0.25    | 0.9468 | 0.01267 | Uiso    | 1.00 | -0.496667 |           |
| O41 | O | 0.713  | 0.9397  | 0.8023 | 0.01267 | Uiso    | 1.00 | -0.488822 |           |
| O42 | O | 0.7639 | 0.9994  | 0.758  | 0.01267 | Uiso    | 1.00 | -0.519944 |           |
| O43 | O | 0.0751 | 0.6098  | 0.3934 | 0.01267 | Uiso    | 1.00 | -0.545489 |           |
| O44 | O | 0.2563 | 0.5698  | 0.4064 | 0.01267 | Uiso    | 1.00 | -0.548159 |           |
| O45 | O | 0.499  | 0.8001  | 0.0597 | 0.01267 | Uiso    | 1.00 | -0.554394 |           |
| O46 | O | 0.6753 | 0.75    | 0.0532 | 0.01267 | Uiso    | 1.00 | -0.494634 |           |
| O47 | O | 0.455  | 0.0603  | 0.1977 | 0.01267 | Uiso    | 1.00 | -0.501626 |           |
| O48 | O | 0.5213 | 0.0006  | 0.242  | 0.01267 | Uiso    | 1.00 | -0.509686 |           |
| O49 | O | 0.25   | 0.5     | 0.5    | 0.01267 | Uiso    | 1.00 | -0.857336 |           |

O50 O 0 0 0 0.01267 Uiso 1.00 -0.857430

data\_RUGKOV\_clean

\_cell\_length\_a 20.1049

\_cell\_length\_b 12.7575

\_cell\_length\_c 14.427

\_cell\_angle\_alpha 90

\_cell\_angle\_beta 90

\_cell\_angle\_gamma 90

\_symmetry\_space\_group\_name\_H-M P 1

\_symmetry\_int\_tables\_number 1

loop\_

\_symmetry\_equiv\_pos\_as\_xyz

'x,y,z'

loop\_

\_atom\_site\_label

\_atom\_site\_occupancy

\_atom\_site\_fract\_x

\_atom\_site\_fract\_y

\_atom\_site\_fract\_z

\_atom\_site\_thermal\_displace\_type

\_atom\_site\_B\_iso\_or\_equiv

\_atom\_site\_type\_symbol

\_atom\_site\_charge

|     |   |         |         |         |      |   |    |           |
|-----|---|---------|---------|---------|------|---|----|-----------|
| Zn1 | 1 | 0.23262 | 0.70643 | 0.33937 | Biso | 1 | Zn | 0.663012  |
| Zn2 | 1 | 0.26797 | 0.53213 | 0.17437 | Biso | 1 | Zn | 0.782005  |
| N1  | 1 | 0.171   | 0.5686  | 0.1569  | Biso | 1 | N  | -0.382626 |
| N2  | 1 | 0.2751  | 0.4886  | 0.3075  | Biso | 1 | N  | -0.219549 |
| N3  | 1 | 0.1837  | 0.169   | 0.8262  | Biso | 1 | N  | -0.215776 |
| N4  | 1 | 0.0699  | 0.5655  | 0.0834  | Biso | 1 | N  | -0.299450 |
| O1  | 1 | 0.0474  | 0.3692  | 0.9619  | Biso | 1 | O  | -0.612502 |
| C1  | 1 | 0.0702  | 0.6404  | 0.1545  | Biso | 1 | C  | -0.050721 |
| N5  | 1 | 0.2554  | 0.5594  | 0.3739  | Biso | 1 | N  | -0.171481 |
| N6  | 1 | 0.1989  | 0.2377  | 0.7579  | Biso | 1 | N  | -0.150793 |
| O2  | 1 | 0.266   | 0.3455  | 0.5932  | Biso | 1 | O  | -0.554506 |
| O3  | 1 | 0.305   | 0.2335  | 0.4929  | Biso | 1 | O  | -0.585528 |
| C2  | 1 | 0.1397  | 0.2137  | 0.8826  | Biso | 1 | C  | -0.064341 |
| H1  | 1 | 0.1213  | 0.1823  | 0.9348  | Biso | 1 | H  | 0.118704  |
| C3  | 1 | 0.257   | 0.5086  | 0.4559  | Biso | 1 | C  | 0.004385  |
| H2  | 1 | 0.2461  | 0.5383  | 0.5128  | Biso | 1 | H  | 0.138752  |
| C4  | 1 | 0.2772  | 0.4069  | 0.4433  | Biso | 1 | C  | -0.120153 |
| C5  | 1 | 0.1298  | 0.6395  | 0.1979  | Biso | 1 | C  | 0.288941  |
| C6  | 1 | 0.1649  | 0.3234  | 0.7741  | Biso | 1 | C  | -0.004848 |
| H3  | 1 | 0.1674  | 0.3832  | 0.7374  | Biso | 1 | H  | 0.133786  |
| C7  | 1 | 0.0812  | 0.3966  | 0.8917  | Biso | 1 | C  | 0.615862  |
| N7  | 1 | 0.1443  | 0.7007  | 0.2723  | Biso | 1 | N  | -0.329122 |
| C8  | 1 | 0.1329  | 0.5248  | 0.0902  | Biso | 1 | C  | 0.144693  |
| H4  | 1 | 0.1482  | 0.4714  | 0.0519  | Biso | 1 | H  | 0.094000  |
| N8  | 1 | 0.9621  | 0.7258  | 0.1388  | Biso | 1 | N  | -0.686666 |

|     |   |         |        |         |      |         |      |           |    |          |  |
|-----|---|---------|--------|---------|------|---------|------|-----------|----|----------|--|
| H5  | 1 | 0.935   | 0.7741 | 0.1561  | Biso | 1       | H    | 0.360614  |    |          |  |
| H6  | 1 | 0.9522  | 0.6862 | 0.0925  | Biso | 1       | H    | 0.348400  |    |          |  |
| C9  | 1 | 0.1253  | 0.3151 | 0.8513  | Biso | 1       | C    | -0.145401 |    |          |  |
| C10 | 1 | 0.0944  | 0.763  | 0.2962  | Biso | 1       | C    | 0.247821  |    |          |  |
| H7  | 1 | 0.1015  | 0.8048 | 0.3481  | Biso | 1       | H    | 0.089841  |    |          |  |
| O4  | 1 | 0.0796  | 0.4816 | 0.8626  | Biso | 1       | O    | -0.523694 |    |          |  |
| C11 | 1 | 0.2866  | 0.3997 | 0.3508  | Biso | 1       | C    | -0.030026 |    |          |  |
| H8  | 1 | 0.2997  | 0.3385 | 0.3209  | Biso | 1       | H    | 0.120806  |    |          |  |
| C12 | 1 | 0.021   | 0.712  | 0.1847  | Biso | 1       | C    | 0.433950  |    |          |  |
| N9  | 1 | 0.035   | 0.7733 | 0.255   | Biso | 1       | N    | -0.407055 |    |          |  |
| C13 | 1 | 0.2836  | 0.3251 | 0.5107  | Biso | 1       | C    | 0.582678  |    |          |  |
| Zn3 | 1 | 0.76738 |        | 0.29357 |      | 0.33937 | Biso | 1         | Zn | 0.662915 |  |
| Zn4 | 1 | 0.73203 |        | 0.46787 |      | 0.17437 | Biso | 1         | Zn | 0.782115 |  |
| N10 | 1 | 0.829   | 0.4314 | 0.1569  | Biso | 1       | N    | -0.382481 |    |          |  |
| N11 | 1 | 0.7249  | 0.5114 | 0.3075  | Biso | 1       | N    | -0.219421 |    |          |  |
| N12 | 1 | 0.8163  | 0.831  | 0.8262  | Biso | 1       | N    | -0.215545 |    |          |  |
| N13 | 1 | 0.9301  | 0.4345 | 0.0834  | Biso | 1       | N    | -0.299538 |    |          |  |
| O5  | 1 | 0.9526  | 0.6308 | 0.9619  | Biso | 1       | O    | -0.612667 |    |          |  |
| C14 | 1 | 0.9298  | 0.3596 | 0.1545  | Biso | 1       | C    | -0.051049 |    |          |  |
| N14 | 1 | 0.7446  | 0.4406 | 0.3739  | Biso | 1       | N    | -0.171668 |    |          |  |
| N15 | 1 | 0.8011  | 0.7623 | 0.7579  | Biso | 1       | N    | -0.150529 |    |          |  |
| O6  | 1 | 0.734   | 0.6545 | 0.5932  | Biso | 1       | O    | -0.554761 |    |          |  |
| O7  | 1 | 0.695   | 0.7665 | 0.4929  | Biso | 1       | O    | -0.585321 |    |          |  |
| C15 | 1 | 0.8603  | 0.7863 | 0.8826  | Biso | 1       | C    | -0.064489 |    |          |  |
| H9  | 1 | 0.8787  | 0.8177 | 0.9348  | Biso | 1       | H    | 0.118724  |    |          |  |
| C16 | 1 | 0.743   | 0.4914 | 0.4559  | Biso | 1       | C    | 0.004314  |    |          |  |
| H10 | 1 | 0.7539  | 0.4617 | 0.5128  | Biso | 1       | H    | 0.138667  |    |          |  |
| C17 | 1 | 0.7228  | 0.5931 | 0.4433  | Biso | 1       | C    | -0.120103 |    |          |  |
| C18 | 1 | 0.8702  | 0.3605 | 0.1979  | Biso | 1       | C    | 0.288912  |    |          |  |
| C19 | 1 | 0.8351  | 0.6766 | 0.7741  | Biso | 1       | C    | -0.005152 |    |          |  |
| H11 | 1 | 0.8326  | 0.6168 | 0.7374  | Biso | 1       | H    | 0.133788  |    |          |  |
| C20 | 1 | 0.9188  | 0.6034 | 0.8917  | Biso | 1       | C    | 0.616183  |    |          |  |
| N16 | 1 | 0.8557  | 0.2993 | 0.2723  | Biso | 1       | N    | -0.328758 |    |          |  |
| C21 | 1 | 0.8671  | 0.4752 | 0.0902  | Biso | 1       | C    | 0.144924  |    |          |  |
| H12 | 1 | 0.8518  | 0.5286 | 0.0519  | Biso | 1       | H    | 0.094060  |    |          |  |
| N17 | 1 | 0.0379  | 0.2742 | 0.1388  | Biso | 1       | N    | -0.686753 |    |          |  |
| H13 | 1 | 0.065   | 0.2259 | 0.1561  | Biso | 1       | H    | 0.360381  |    |          |  |
| H14 | 1 | 0.0478  | 0.3138 | 0.0925  | Biso | 1       | H    | 0.348366  |    |          |  |
| C22 | 1 | 0.8747  | 0.6849 | 0.8513  | Biso | 1       | C    | -0.145484 |    |          |  |
| C23 | 1 | 0.9056  | 0.237  | 0.2962  | Biso | 1       | C    | 0.247652  |    |          |  |
| H15 | 1 | 0.8985  | 0.1952 | 0.3481  | Biso | 1       | H    | 0.089812  |    |          |  |
| O8  | 1 | 0.9204  | 0.5184 | 0.8626  | Biso | 1       | O    | -0.523923 |    |          |  |
| C24 | 1 | 0.7134  | 0.6003 | 0.3508  | Biso | 1       | C    | -0.029863 |    |          |  |
| H16 | 1 | 0.7003  | 0.6615 | 0.3209  | Biso | 1       | H    | 0.120905  |    |          |  |
| C25 | 1 | 0.979   | 0.288  | 0.1847  | Biso | 1       | C    | 0.434220  |    |          |  |
| N18 | 1 | 0.965   | 0.2267 | 0.255   | Biso | 1       | N    | -0.407367 |    |          |  |
| C26 | 1 | 0.7164  | 0.6749 | 0.5107  | Biso | 1       | C    | 0.582729  |    |          |  |
| Zn5 | 1 | 0.26738 |        | 0.20643 |      | 0.66063 | Biso | 1         | Zn | 0.662931 |  |
| Zn6 | 1 | 0.23203 |        | 0.03213 |      | 0.82563 | Biso | 1         | Zn | 0.782098 |  |
| N19 | 1 | 0.329   | 0.0686 | 0.8431  | Biso | 1       | N    | -0.382550 |    |          |  |
| N20 | 1 | 0.2249  | 0.9886 | 0.6925  | Biso | 1       | N    | -0.219556 |    |          |  |
| N21 | 1 | 0.3163  | 0.669  | 0.1738  | Biso | 1       | N    | -0.215764 |    |          |  |

|     |   |         |        |         |      |         |      |           |    |          |
|-----|---|---------|--------|---------|------|---------|------|-----------|----|----------|
| N22 | 1 | 0.4301  | 0.0655 | 0.9166  | Biso | 1       | N    | -0.299434 |    |          |
| O9  | 1 | 0.4526  | 0.8692 | 0.0381  | Biso | 1       | O    | -0.612686 |    |          |
| C27 | 1 | 0.4298  | 0.1404 | 0.8455  | Biso | 1       | C    | -0.050944 |    |          |
| N23 | 1 | 0.2446  | 0.0594 | 0.6261  | Biso | 1       | N    | -0.171348 |    |          |
| N24 | 1 | 0.3011  | 0.7377 | 0.2421  | Biso | 1       | N    | -0.150769 |    |          |
| O10 | 1 | 0.234   | 0.8455 | 0.4068  | Biso | 1       | O    | -0.554493 |    |          |
| O11 | 1 | 0.195   | 0.7335 | 0.5071  | Biso | 1       | O    | -0.585584 |    |          |
| C28 | 1 | 0.3603  | 0.7137 | 0.1174  | Biso | 1       | C    | -0.064438 |    |          |
| H17 | 1 | 0.3787  | 0.6823 | 0.0652  | Biso | 1       | H    | 0.118712  |    |          |
| C29 | 1 | 0.243   | 0.0086 | 0.5441  | Biso | 1       | C    | 0.004498  |    |          |
| H18 | 1 | 0.2539  | 0.0383 | 0.4872  | Biso | 1       | H    | 0.138652  |    |          |
| C30 | 1 | 0.2228  | 0.9069 | 0.5567  | Biso | 1       | C    | -0.120142 |    |          |
| C31 | 1 | 0.3702  | 0.1395 | 0.8021  | Biso | 1       | C    | 0.289022  |    |          |
| C32 | 1 | 0.3351  | 0.8234 | 0.2259  | Biso | 1       | C    | -0.004767 |    |          |
| H19 | 1 | 0.3326  | 0.8832 | 0.2626  | Biso | 1       | H    | 0.133792  |    |          |
| C33 | 1 | 0.4188  | 0.8966 | 0.1083  | Biso | 1       | C    | 0.616094  |    |          |
| N25 | 1 | 0.3557  | 0.2007 | 0.7277  | Biso | 1       | N    | -0.329055 |    |          |
| C34 | 1 | 0.3671  | 0.0248 | 0.9098  | Biso | 1       | C    | 0.144758  |    |          |
| H20 | 1 | 0.3518  | 0.9714 | 0.9481  | Biso | 1       | H    | 0.094029  |    |          |
| N26 | 1 | 0.5379  | 0.2258 | 0.8612  | Biso | 1       | N    | -0.686645 |    |          |
| H21 | 1 | 0.565   | 0.2741 | 0.8439  | Biso | 1       | H    | 0.360398  |    |          |
| H22 | 1 | 0.5478  | 0.1862 | 0.9075  | Biso | 1       | H    | 0.348253  |    |          |
| C35 | 1 | 0.3747  | 0.8151 | 0.1487  | Biso | 1       | C    | -0.145523 |    |          |
| C36 | 1 | 0.4056  | 0.263  | 0.7038  | Biso | 1       | C    | 0.247780  |    |          |
| H23 | 1 | 0.3985  | 0.3048 | 0.6519  | Biso | 1       | H    | 0.089836  |    |          |
| O12 | 1 | 0.4204  | 0.9816 | 0.1374  | Biso | 1       | O    | -0.523707 |    |          |
| C37 | 1 | 0.2134  | 0.8997 | 0.6492  | Biso | 1       | C    | -0.030075 |    |          |
| H24 | 1 | 0.2003  | 0.8385 | 0.6791  | Biso | 1       | H    | 0.120819  |    |          |
| C38 | 1 | 0.479   | 0.212  | 0.8153  | Biso | 1       | C    | 0.434234  |    |          |
| N27 | 1 | 0.465   | 0.2733 | 0.745   | Biso | 1       | N    | -0.407162 |    |          |
| C39 | 1 | 0.2164  | 0.8251 | 0.4893  | Biso | 1       | C    | 0.582730  |    |          |
| Zn7 | 1 | 0.73262 |        | 0.79357 |      | 0.66063 | Biso | 1         | Zn | 0.662853 |
| Zn8 | 1 | 0.76797 |        | 0.96787 |      | 0.82563 | Biso | 1         | Zn | 0.782078 |
| N28 | 1 | 0.671   | 0.9314 | 0.8431  | Biso | 1       | N    | -0.382689 |    |          |
| N29 | 1 | 0.7751  | 0.0114 | 0.6925  | Biso | 1       | N    | -0.219484 |    |          |
| N30 | 1 | 0.6837  | 0.331  | 0.1738  | Biso | 1       | N    | -0.215704 |    |          |
| N31 | 1 | 0.5699  | 0.9345 | 0.9166  | Biso | 1       | N    | -0.299296 |    |          |
| O13 | 1 | 0.5474  | 0.1308 | 0.0381  | Biso | 1       | O    | -0.612371 |    |          |
| C40 | 1 | 0.5702  | 0.8596 | 0.8455  | Biso | 1       | C    | -0.050698 |    |          |
| N32 | 1 | 0.7554  | 0.9406 | 0.6261  | Biso | 1       | N    | -0.171523 |    |          |
| N33 | 1 | 0.6989  | 0.2623 | 0.2421  | Biso | 1       | N    | -0.150878 |    |          |
| O14 | 1 | 0.766   | 0.1545 | 0.4068  | Biso | 1       | O    | -0.554546 |    |          |
| O15 | 1 | 0.805   | 0.2665 | 0.5071  | Biso | 1       | O    | -0.585530 |    |          |
| C41 | 1 | 0.6397  | 0.2863 | 0.1174  | Biso | 1       | C    | -0.064234 |    |          |
| H25 | 1 | 0.6213  | 0.3177 | 0.0652  | Biso | 1       | H    | 0.118723  |    |          |
| C42 | 1 | 0.757   | 0.9914 | 0.5441  | Biso | 1       | C    | 0.004407  |    |          |
| H26 | 1 | 0.7461  | 0.9617 | 0.4872  | Biso | 1       | H    | 0.138762  |    |          |
| C43 | 1 | 0.7772  | 0.0931 | 0.5567  | Biso | 1       | C    | -0.120069 |    |          |
| C44 | 1 | 0.6298  | 0.8605 | 0.8021  | Biso | 1       | C    | 0.288852  |    |          |
| C45 | 1 | 0.6649  | 0.1766 | 0.2259  | Biso | 1       | C    | -0.005021 |    |          |
| H27 | 1 | 0.6674  | 0.1168 | 0.2626  | Biso | 1       | H    | 0.133784  |    |          |
| C46 | 1 | 0.5812  | 0.1034 | 0.1083  | Biso | 1       | C    | 0.615860  |    |          |

|      |   |        |        |         |      |   |    |           |
|------|---|--------|--------|---------|------|---|----|-----------|
| N34  | 1 | 0.6443 | 0.7993 | 0.7277  | Biso | 1 | N  | -0.329114 |
| C47  | 1 | 0.6329 | 0.9752 | 0.9098  | Biso | 1 | C  | 0.144753  |
| H28  | 1 | 0.6482 | 0.0286 | 0.9481  | Biso | 1 | H  | 0.094034  |
| N35  | 1 | 0.4621 | 0.7742 | 0.8612  | Biso | 1 | N  | -0.686546 |
| H29  | 1 | 0.435  | 0.7259 | 0.8439  | Biso | 1 | H  | 0.360447  |
| H30  | 1 | 0.4522 | 0.8138 | 0.9075  | Biso | 1 | H  | 0.348434  |
| C48  | 1 | 0.6253 | 0.1849 | 0.1487  | Biso | 1 | C  | -0.145235 |
| C49  | 1 | 0.5944 | 0.737  | 0.7038  | Biso | 1 | C  | 0.247649  |
| H31  | 1 | 0.6015 | 0.6952 | 0.6519  | Biso | 1 | H  | 0.089818  |
| O16  | 1 | 0.5796 | 0.0184 | 0.1374  | Biso | 1 | O  | -0.523868 |
| C50  | 1 | 0.7866 | 0.1003 | 0.6492  | Biso | 1 | C  | -0.030071 |
| H32  | 1 | 0.7997 | 0.1615 | 0.6791  | Biso | 1 | H  | 0.120851  |
| C51  | 1 | 0.521  | 0.788  | 0.8153  | Biso | 1 | C  | 0.434003  |
| N36  | 1 | 0.535  | 0.7267 | 0.745   | Biso | 1 | N  | -0.407026 |
| C52  | 1 | 0.7836 | 0.1749 | 0.4893  | Biso | 1 | C  | 0.582767  |
| Zn9  | 1 | 0      | 0.5    | 0.99806 | Biso | 1 | Zn | 0.771934  |
| Zn10 | 1 | 0.5    | 0      | 0.00194 | Biso | 1 | Zn | 0.772093  |

data\_XACZEH\_clean

\_audit\_creation\_date 2014-07-02

\_audit\_creation\_method 'Materials Studio'

\_symmetry\_space\_group\_name\_H-M 'P1'

\_symmetry\_Int\_Tables\_number 1

\_symmetry\_cell\_setting triclinic

loop\_

\_symmetry\_equiv\_pos\_as\_xyz

x,y,z

\_cell\_length\_a 14.285

\_cell\_length\_b 18.7158

\_cell\_length\_c 18.7158

\_cell\_angle\_alpha 66.24

\_cell\_angle\_beta 75.2608

\_cell\_angle\_gamma 104.739

loop\_

\_atom\_site\_label

\_atom\_site\_type\_symbol

\_atom\_site\_fract\_x

\_atom\_site\_fract\_y

\_atom\_site\_fract\_z

\_atom\_site\_U\_iso\_or\_equiv

\_atom\_site\_adp\_type

\_atom\_site\_occupancy

\_atom\_site\_charge

|      |    |         |         |         |         |      |   |          |
|------|----|---------|---------|---------|---------|------|---|----------|
| Cu1  | Cu | 0.40337 | 0.44059 | 0.00743 | 0.01267 | Uiso | 1 | 0.696445 |
| Cu2  | Cu | 0.46757 | 0.52714 | 0.33119 | 0.01267 | Uiso | 1 | 0.707501 |
| Cu3  | Cu | 0.4108  | 0.00743 | 0.55198 | 0.01267 | Uiso | 1 | 0.696786 |
| Cu4  | Cu | 0.79876 | 0.33119 | 0.14167 | 0.01267 | Uiso | 1 | 0.708917 |
| Cu5  | Cu | 0.96278 | 0.55198 | 0.44059 | 0.01267 | Uiso | 1 | 0.69813  |
| Cu6  | Cu | 0.94043 | 0.14167 | 0.52714 | 0.01267 | Uiso | 1 | 0.706165 |
| Cu7  | Cu | 0.59663 | 0.55941 | 0.99257 | 0.01267 | Uiso | 1 | 0.695742 |
| Cu8  | Cu | 0.53243 | 0.47286 | 0.66881 | 0.01267 | Uiso | 1 | 0.707578 |
| Cu9  | Cu | 0.5892  | 0.99257 | 0.44802 | 0.01267 | Uiso | 1 | 0.696974 |
| Cu10 | Cu | 0.20124 | 0.66881 | 0.85833 | 0.01267 | Uiso | 1 | 0.708948 |
| Cu11 | Cu | 0.03722 | 0.44802 | 0.55941 | 0.01267 | Uiso | 1 | 0.698302 |
| Cu12 | Cu | 0.05957 | 0.85833 | 0.47286 | 0.01267 | Uiso | 1 | 0.706006 |
| H1   | H  | 0.199   | 0.3153  | 0.1711  | 0.01267 | Uiso | 1 | 0.090685 |
| H2   | H  | 0.5928  | 0.5785  | 0.1514  | 0.01267 | Uiso | 1 | 0.104174 |
| H3   | H  | 0.2684  | 0.3704  | 0.405   | 0.01267 | Uiso | 1 | 0.354931 |
| H4   | H  | 0.1706  | 0.3054  | 0.418   | 0.01267 | Uiso | 1 | 0.357043 |
| H5   | H  | 0.3451  | 0.2552  | 0.0876  | 0.01267 | Uiso | 1 | 0.084132 |
| H6   | H  | 0.7586  | 0.4977  | 0.0511  | 0.01267 | Uiso | 1 | 0.106603 |
| H7   | H  | 0.5272  | 0.1157  | 0.1824  | 0.01267 | Uiso | 1 | 0.36591  |
| H8   | H  | 0.6288  | 0.1783  | 0.1673  | 0.01267 | Uiso | 1 | 0.343398 |
| H9   | H  | 0.3701  | 0.1711  | 0.5136  | 0.01267 | Uiso | 1 | 0.091247 |
| H10  | H  | 0.7442  | 0.1514  | 0.2701  | 0.01267 | Uiso | 1 | 0.103328 |
| H11  | H  | 0.6734  | 0.405   | 0.2246  | 0.01267 | Uiso | 1 | 0.354399 |
| H12  | H  | 0.5886  | 0.418   | 0.2766  | 0.01267 | Uiso | 1 | 0.354674 |
| H13  | H  | 0.4327  | 0.0876  | 0.6572  | 0.01267 | Uiso | 1 | 0.084905 |

|     |   |        |        |        |         |      |   |           |
|-----|---|--------|--------|--------|---------|------|---|-----------|
| H14 | H | 0.8097 | 0.0511 | 0.4512 | 0.01267 | Uiso | 1 | 0.106877  |
| H15 | H | 0.7096 | 0.1824 | 0.7019 | 0.01267 | Uiso | 1 | 0.364234  |
| H16 | H | 0.7961 | 0.1673 | 0.6544 | 0.01267 | Uiso | 1 | 0.340107  |
| H17 | H | 0.8837 | 0.5136 | 0.3153 | 0.01267 | Uiso | 1 | 0.090734  |
| H18 | H | 0.0143 | 0.2701 | 0.5785 | 0.01267 | Uiso | 1 | 0.104404  |
| H19 | H | 0.898  | 0.2246 | 0.3704 | 0.01267 | Uiso | 1 | 0.356378  |
| H20 | H | 0.8652 | 0.2766 | 0.3054 | 0.01267 | Uiso | 1 | 0.356602  |
| H21 | H | 0.0899 | 0.6572 | 0.2552 | 0.01267 | Uiso | 1 | 0.085716  |
| H22 | H | 0.2609 | 0.4512 | 0.4977 | 0.01267 | Uiso | 1 | 0.107254  |
| H23 | H | 0.4115 | 0.7019 | 0.1157 | 0.01267 | Uiso | 1 | 0.365318  |
| H24 | H | 0.4505 | 0.6544 | 0.1783 | 0.01267 | Uiso | 1 | 0.342229  |
| H25 | H | 0.801  | 0.6847 | 0.8289 | 0.01267 | Uiso | 1 | 0.090601  |
| H26 | H | 0.4072 | 0.4215 | 0.8486 | 0.01267 | Uiso | 1 | 0.10432   |
| H27 | H | 0.7316 | 0.6296 | 0.595  | 0.01267 | Uiso | 1 | 0.354996  |
| H28 | H | 0.8294 | 0.6946 | 0.582  | 0.01267 | Uiso | 1 | 0.356794  |
| H29 | H | 0.6549 | 0.7448 | 0.9124 | 0.01267 | Uiso | 1 | 0.08413   |
| H30 | H | 0.2414 | 0.5023 | 0.9489 | 0.01267 | Uiso | 1 | 0.106717  |
| H31 | H | 0.4728 | 0.8843 | 0.8176 | 0.01267 | Uiso | 1 | 0.365716  |
| H32 | H | 0.3712 | 0.8217 | 0.8327 | 0.01267 | Uiso | 1 | 0.343411  |
| H33 | H | 0.6299 | 0.8289 | 0.4864 | 0.01267 | Uiso | 1 | 0.091289  |
| H34 | H | 0.2558 | 0.8486 | 0.7299 | 0.01267 | Uiso | 1 | 0.103271  |
| H35 | H | 0.3266 | 0.595  | 0.7754 | 0.01267 | Uiso | 1 | 0.354427  |
| H36 | H | 0.4114 | 0.582  | 0.7234 | 0.01267 | Uiso | 1 | 0.35483   |
| H37 | H | 0.5673 | 0.9124 | 0.3428 | 0.01267 | Uiso | 1 | 0.084936  |
| H38 | H | 0.1903 | 0.9489 | 0.5488 | 0.01267 | Uiso | 1 | 0.106759  |
| H39 | H | 0.2904 | 0.8176 | 0.2981 | 0.01267 | Uiso | 1 | 0.364376  |
| H40 | H | 0.2039 | 0.8327 | 0.3456 | 0.01267 | Uiso | 1 | 0.340101  |
| H41 | H | 0.1163 | 0.4864 | 0.6847 | 0.01267 | Uiso | 1 | 0.09089   |
| H42 | H | 0.9857 | 0.7299 | 0.4215 | 0.01267 | Uiso | 1 | 0.104303  |
| H43 | H | 0.102  | 0.7754 | 0.6296 | 0.01267 | Uiso | 1 | 0.356233  |
| H44 | H | 0.1348 | 0.7234 | 0.6946 | 0.01267 | Uiso | 1 | 0.356637  |
| H45 | H | 0.9101 | 0.3428 | 0.7448 | 0.01267 | Uiso | 1 | 0.085903  |
| H46 | H | 0.7391 | 0.5488 | 0.5023 | 0.01267 | Uiso | 1 | 0.107163  |
| H47 | H | 0.5885 | 0.2981 | 0.8843 | 0.01267 | Uiso | 1 | 0.365494  |
| H48 | H | 0.5495 | 0.3456 | 0.8217 | 0.01267 | Uiso | 1 | 0.342148  |
| C1  | C | 0.6694 | 0.5683 | 0.32   | 0.01267 | Uiso | 1 | 0.470639  |
| C2  | C | 0.6124 | 0.5928 | 0.3835 | 0.01267 | Uiso | 1 | 0.461035  |
| C3  | C | 0.2418 | 0.3555 | 0.1921 | 0.01267 | Uiso | 1 | 0.257584  |
| C4  | C | 0.3971 | 0.4573 | 0.1559 | 0.01267 | Uiso | 1 | 0.296356  |
| C5  | C | 0.3644 | 0.4405 | 0.2408 | 0.01267 | Uiso | 1 | -0.060487 |
| C6  | C | 0.2675 | 0.3739 | 0.3017 | 0.01267 | Uiso | 1 | 0.434385  |
| C7  | C | 0.521  | 0.5361 | 0.1678 | 0.01267 | Uiso | 1 | 0.161549  |
| C8  | C | 0.4129 | 0.2728 | 0.0872 | 0.01267 | Uiso | 1 | 0.22715   |
| C9  | C | 0.5561 | 0.3758 | 0.0618 | 0.01267 | Uiso | 1 | 0.286218  |
| C10 | C | 0.5998 | 0.3166 | 0.098  | 0.01267 | Uiso | 1 | -0.053175 |
| C11 | C | 0.537  | 0.2305 | 0.1301 | 0.01267 | Uiso | 1 | 0.414463  |
| C12 | C | 0.7043 | 0.4405 | 0.0569 | 0.01267 | Uiso | 1 | 0.19945   |
| C13 | C | 0.9894 | 0.32   | 0.1117 | 0.01267 | Uiso | 1 | 0.469805  |
| C14 | C | 0.9959 | 0.3835 | 0.0237 | 0.01267 | Uiso | 1 | 0.462354  |
| C15 | C | 0.4339 | 0.1921 | 0.4524 | 0.01267 | Uiso | 1 | 0.257122  |
| C16 | C | 0.553  | 0.1559 | 0.3868 | 0.01267 | Uiso | 1 | 0.296704  |
| C17 | C | 0.6052 | 0.2408 | 0.3187 | 0.01267 | Uiso | 1 | -0.05835  |

|     |   |        |        |        |         |      |   |           |
|-----|---|--------|--------|--------|---------|------|---|-----------|
| C18 | C | 0.5692 | 0.3017 | 0.3244 | 0.01267 | Uiso | 1 | 0.431499  |
| C19 | C | 0.6888 | 0.1678 | 0.2961 | 0.01267 | Uiso | 1 | 0.163219  |
| C20 | C | 0.5001 | 0.0872 | 0.64   | 0.01267 | Uiso | 1 | 0.226304  |
| C21 | C | 0.6179 | 0.0618 | 0.5624 | 0.01267 | Uiso | 1 | 0.28827   |
| C22 | C | 0.6978 | 0.098  | 0.5854 | 0.01267 | Uiso | 1 | -0.055956 |
| C23 | C | 0.6671 | 0.1301 | 0.6394 | 0.01267 | Uiso | 1 | 0.414827  |
| C24 | C | 0.7612 | 0.0569 | 0.5026 | 0.01267 | Uiso | 1 | 0.198461  |
| C25 | C | 0.1011 | 0.1117 | 0.5683 | 0.01267 | Uiso | 1 | 0.470805  |
| C26 | C | 0.0196 | 0.0237 | 0.5928 | 0.01267 | Uiso | 1 | 0.462276  |
| C27 | C | 0.8863 | 0.4524 | 0.3555 | 0.01267 | Uiso | 1 | 0.25798   |
| C28 | C | 0.9398 | 0.3868 | 0.4573 | 0.01267 | Uiso | 1 | 0.298343  |
| C29 | C | 0.9239 | 0.3187 | 0.4405 | 0.01267 | Uiso | 1 | -0.061301 |
| C30 | C | 0.8936 | 0.3244 | 0.3739 | 0.01267 | Uiso | 1 | 0.435168  |
| C31 | C | 0.9849 | 0.2961 | 0.5361 | 0.01267 | Uiso | 1 | 0.162008  |
| C32 | C | 0.1401 | 0.64   | 0.2728 | 0.01267 | Uiso | 1 | 0.223406  |
| C33 | C | 0.1803 | 0.5624 | 0.3758 | 0.01267 | Uiso | 1 | 0.287627  |
| C34 | C | 0.2832 | 0.5854 | 0.3166 | 0.01267 | Uiso | 1 | -0.053979 |
| C35 | C | 0.3065 | 0.6394 | 0.2305 | 0.01267 | Uiso | 1 | 0.414952  |
| C36 | C | 0.2638 | 0.5026 | 0.4405 | 0.01267 | Uiso | 1 | 0.199233  |
| C37 | C | 0.3306 | 0.4317 | 0.68   | 0.01267 | Uiso | 1 | 0.47093   |
| C38 | C | 0.3876 | 0.4072 | 0.6165 | 0.01267 | Uiso | 1 | 0.461148  |
| C39 | C | 0.7582 | 0.6445 | 0.8079 | 0.01267 | Uiso | 1 | 0.257469  |
| C40 | C | 0.6029 | 0.5427 | 0.8441 | 0.01267 | Uiso | 1 | 0.296425  |
| C41 | C | 0.6356 | 0.5595 | 0.7592 | 0.01267 | Uiso | 1 | -0.060645 |
| C42 | C | 0.7325 | 0.6261 | 0.6983 | 0.01267 | Uiso | 1 | 0.434631  |
| C43 | C | 0.479  | 0.4639 | 0.8322 | 0.01267 | Uiso | 1 | 0.161584  |
| C44 | C | 0.5871 | 0.7272 | 0.9128 | 0.01267 | Uiso | 1 | 0.227025  |
| C45 | C | 0.4439 | 0.6242 | 0.9382 | 0.01267 | Uiso | 1 | 0.286088  |
| C46 | C | 0.4002 | 0.6834 | 0.902  | 0.01267 | Uiso | 1 | -0.053277 |
| C47 | C | 0.463  | 0.7695 | 0.8699 | 0.01267 | Uiso | 1 | 0.414647  |
| C48 | C | 0.2957 | 0.5595 | 0.9431 | 0.01267 | Uiso | 1 | 0.199812  |
| C49 | C | 0.0106 | 0.68   | 0.8883 | 0.01267 | Uiso | 1 | 0.470065  |
| C50 | C | 0.0041 | 0.6165 | 0.9763 | 0.01267 | Uiso | 1 | 0.46196   |
| C51 | C | 0.5661 | 0.8079 | 0.5476 | 0.01267 | Uiso | 1 | 0.256998  |
| C52 | C | 0.447  | 0.8441 | 0.6132 | 0.01267 | Uiso | 1 | 0.296655  |
| C53 | C | 0.3948 | 0.7592 | 0.6813 | 0.01267 | Uiso | 1 | -0.058216 |
| C54 | C | 0.4308 | 0.6983 | 0.6756 | 0.01267 | Uiso | 1 | 0.431377  |
| C55 | C | 0.3112 | 0.8322 | 0.7039 | 0.01267 | Uiso | 1 | 0.163137  |
| C56 | C | 0.4999 | 0.9128 | 0.36   | 0.01267 | Uiso | 1 | 0.226339  |
| C57 | C | 0.3821 | 0.9382 | 0.4376 | 0.01267 | Uiso | 1 | 0.288129  |
| C58 | C | 0.3022 | 0.902  | 0.4146 | 0.01267 | Uiso | 1 | -0.055673 |
| C59 | C | 0.3329 | 0.8699 | 0.3606 | 0.01267 | Uiso | 1 | 0.41468   |
| C60 | C | 0.2388 | 0.9431 | 0.4974 | 0.01267 | Uiso | 1 | 0.198225  |
| C61 | C | 0.8989 | 0.8883 | 0.4317 | 0.01267 | Uiso | 1 | 0.470552  |
| C62 | C | 0.9804 | 0.9763 | 0.4072 | 0.01267 | Uiso | 1 | 0.462937  |
| C63 | C | 0.1137 | 0.5476 | 0.6445 | 0.01267 | Uiso | 1 | 0.258196  |
| C64 | C | 0.0602 | 0.6132 | 0.5427 | 0.01267 | Uiso | 1 | 0.298483  |
| C65 | C | 0.0761 | 0.6813 | 0.5595 | 0.01267 | Uiso | 1 | -0.061216 |
| C66 | C | 0.1064 | 0.6756 | 0.6261 | 0.01267 | Uiso | 1 | 0.434977  |
| C67 | C | 0.0151 | 0.7039 | 0.4639 | 0.01267 | Uiso | 1 | 0.16204   |
| C68 | C | 0.8599 | 0.36   | 0.7272 | 0.01267 | Uiso | 1 | 0.223373  |
| C69 | C | 0.8197 | 0.4376 | 0.6242 | 0.01267 | Uiso | 1 | 0.28748   |

|     |   |        |        |        |         |      |   |           |
|-----|---|--------|--------|--------|---------|------|---|-----------|
| C70 | C | 0.7168 | 0.4146 | 0.6834 | 0.01267 | Uiso | 1 | -0.053585 |
| C71 | C | 0.6935 | 0.3606 | 0.7695 | 0.01267 | Uiso | 1 | 0.414759  |
| C72 | C | 0.7362 | 0.4974 | 0.5595 | 0.01267 | Uiso | 1 | 0.199041  |
| N1  | N | 0.2067 | 0.3338 | 0.2715 | 0.01267 | Uiso | 1 | -0.386427 |
| N2  | N | 0.3369 | 0.4155 | 0.1273 | 0.01267 | Uiso | 1 | -0.394002 |
| N3  | N | 0.4444 | 0.4943 | 0.2466 | 0.01267 | Uiso | 1 | -0.338657 |
| N4  | N | 0.4948 | 0.5176 | 0.1115 | 0.01267 | Uiso | 1 | -0.392753 |
| N5  | N | 0.2326 | 0.3478 | 0.3842 | 0.01267 | Uiso | 1 | -0.634623 |
| N6  | N | 0.4396 | 0.2075 | 0.1284 | 0.01267 | Uiso | 1 | -0.411895 |
| N7  | N | 0.4625 | 0.3533 | 0.0531 | 0.01267 | Uiso | 1 | -0.347075 |
| N8  | N | 0.6955 | 0.3612 | 0.0937 | 0.01267 | Uiso | 1 | -0.300056 |
| N9  | N | 0.6229 | 0.4528 | 0.0362 | 0.01267 | Uiso | 1 | -0.392599 |
| N10 | N | 0.5685 | 0.1672 | 0.1631 | 0.01267 | Uiso | 1 | -0.675227 |
| N11 | N | 0.4782 | 0.2715 | 0.3947 | 0.01267 | Uiso | 1 | -0.384749 |
| N12 | N | 0.4642 | 0.1273 | 0.4572 | 0.01267 | Uiso | 1 | -0.392896 |
| N13 | N | 0.691  | 0.2466 | 0.2591 | 0.01267 | Uiso | 1 | -0.340092 |
| N14 | N | 0.6063 | 0.1115 | 0.3709 | 0.01267 | Uiso | 1 | -0.394216 |
| N15 | N | 0.6168 | 0.3842 | 0.268  | 0.01267 | Uiso | 1 | -0.630366 |
| N16 | N | 0.568  | 0.1284 | 0.6641 | 0.01267 | Uiso | 1 | -0.411307 |
| N17 | N | 0.5156 | 0.0531 | 0.5936 | 0.01267 | Uiso | 1 | -0.346867 |
| N18 | N | 0.7892 | 0.0937 | 0.5451 | 0.01267 | Uiso | 1 | -0.297468 |
| N19 | N | 0.6591 | 0.0362 | 0.511  | 0.01267 | Uiso | 1 | -0.391546 |
| N20 | N | 0.7316 | 0.1631 | 0.6697 | 0.01267 | Uiso | 1 | -0.668465 |
| N21 | N | 0.8729 | 0.3947 | 0.3338 | 0.01267 | Uiso | 1 | -0.386391 |
| N22 | N | 0.9214 | 0.4572 | 0.4155 | 0.01267 | Uiso | 1 | -0.394592 |
| N23 | N | 0.9501 | 0.2591 | 0.4943 | 0.01267 | Uiso | 1 | -0.33748  |
| N24 | N | 0.9772 | 0.3709 | 0.5176 | 0.01267 | Uiso | 1 | -0.395637 |
| N25 | N | 0.8848 | 0.268  | 0.3478 | 0.01267 | Uiso | 1 | -0.635327 |
| N26 | N | 0.2321 | 0.6641 | 0.2075 | 0.01267 | Uiso | 1 | -0.410674 |
| N27 | N | 0.1092 | 0.5936 | 0.3533 | 0.01267 | Uiso | 1 | -0.345766 |
| N28 | N | 0.3343 | 0.5451 | 0.3612 | 0.01267 | Uiso | 1 | -0.300567 |
| N29 | N | 0.1701 | 0.511  | 0.4528 | 0.01267 | Uiso | 1 | -0.392903 |
| N30 | N | 0.4013 | 0.6697 | 0.1672 | 0.01267 | Uiso | 1 | -0.671604 |
| N31 | N | 0.7933 | 0.6662 | 0.7285 | 0.01267 | Uiso | 1 | -0.386754 |
| N32 | N | 0.6631 | 0.5845 | 0.8727 | 0.01267 | Uiso | 1 | -0.393803 |
| N33 | N | 0.5556 | 0.5057 | 0.7534 | 0.01267 | Uiso | 1 | -0.33872  |
| N34 | N | 0.5052 | 0.4824 | 0.8885 | 0.01267 | Uiso | 1 | -0.392727 |
| N35 | N | 0.7674 | 0.6522 | 0.6158 | 0.01267 | Uiso | 1 | -0.634505 |
| N36 | N | 0.5604 | 0.7925 | 0.8716 | 0.01267 | Uiso | 1 | -0.41225  |
| N37 | N | 0.5375 | 0.6467 | 0.9469 | 0.01267 | Uiso | 1 | -0.346754 |
| N38 | N | 0.3045 | 0.6388 | 0.9063 | 0.01267 | Uiso | 1 | -0.300585 |
| N39 | N | 0.3771 | 0.5472 | 0.9638 | 0.01267 | Uiso | 1 | -0.392248 |
| N40 | N | 0.4315 | 0.8328 | 0.8369 | 0.01267 | Uiso | 1 | -0.675427 |
| N41 | N | 0.5218 | 0.7285 | 0.6053 | 0.01267 | Uiso | 1 | -0.384306 |
| N42 | N | 0.5358 | 0.8727 | 0.5428 | 0.01267 | Uiso | 1 | -0.39301  |
| N43 | N | 0.309  | 0.7534 | 0.7409 | 0.01267 | Uiso | 1 | -0.339695 |
| N44 | N | 0.3937 | 0.8885 | 0.6291 | 0.01267 | Uiso | 1 | -0.394562 |
| N45 | N | 0.3832 | 0.6158 | 0.732  | 0.01267 | Uiso | 1 | -0.630231 |
| N46 | N | 0.432  | 0.8716 | 0.3359 | 0.01267 | Uiso | 1 | -0.411148 |
| N47 | N | 0.4844 | 0.9469 | 0.4064 | 0.01267 | Uiso | 1 | -0.347067 |
| N48 | N | 0.2108 | 0.9063 | 0.4549 | 0.01267 | Uiso | 1 | -0.297401 |
| N49 | N | 0.3409 | 0.9638 | 0.489  | 0.01267 | Uiso | 1 | -0.391599 |

|     |   |        |        |        |         |      |   |           |
|-----|---|--------|--------|--------|---------|------|---|-----------|
| N50 | N | 0.2684 | 0.8369 | 0.3303 | 0.01267 | Uiso | 1 | -0.668544 |
| N51 | N | 0.1271 | 0.6053 | 0.6662 | 0.01267 | Uiso | 1 | -0.386303 |
| N52 | N | 0.0786 | 0.5428 | 0.5845 | 0.01267 | Uiso | 1 | -0.394634 |
| N53 | N | 0.0499 | 0.7409 | 0.5057 | 0.01267 | Uiso | 1 | -0.337812 |
| N54 | N | 0.0228 | 0.6291 | 0.4824 | 0.01267 | Uiso | 1 | -0.395688 |
| N55 | N | 0.1152 | 0.732  | 0.6522 | 0.01267 | Uiso | 1 | -0.635426 |
| N56 | N | 0.7679 | 0.3359 | 0.7925 | 0.01267 | Uiso | 1 | -0.410344 |
| N57 | N | 0.8908 | 0.4064 | 0.6467 | 0.01267 | Uiso | 1 | -0.345795 |
| N58 | N | 0.6657 | 0.4549 | 0.6388 | 0.01267 | Uiso | 1 | -0.300712 |
| N59 | N | 0.8299 | 0.489  | 0.5472 | 0.01267 | Uiso | 1 | -0.392802 |
| N60 | N | 0.5987 | 0.3303 | 0.8328 | 0.01267 | Uiso | 1 | -0.671578 |
| O1  | O | 0.612  | 0.5347 | 0.2915 | 0.01267 | Uiso | 1 | -0.542652 |
| O2  | O | 0.5131 | 0.5733 | 0.3979 | 0.01267 | Uiso | 1 | -0.529242 |
| O3  | O | 0.7634 | 0.583  | 0.3008 | 0.01267 | Uiso | 1 | -0.489849 |
| O4  | O | 0.6634 | 0.6283 | 0.4118 | 0.01267 | Uiso | 1 | -0.474114 |
| O5  | O | 0.9035 | 0.2915 | 0.1738 | 0.01267 | Uiso | 1 | -0.542406 |
| O6  | O | 0.911  | 0.3979 | 0.0288 | 0.01267 | Uiso | 1 | -0.530373 |
| O7  | O | 0.0642 | 0.3008 | 0.1162 | 0.01267 | Uiso | 1 | -0.489284 |
| O8  | O | 0.0752 | 0.4118 | 0.9599 | 0.01267 | Uiso | 1 | -0.475095 |
| O9  | O | 0.0773 | 0.1738 | 0.5347 | 0.01267 | Uiso | 1 | -0.543034 |
| O10 | O | 0.9398 | 0.0288 | 0.5733 | 0.01267 | Uiso | 1 | -0.529996 |
| O11 | O | 0.1804 | 0.1162 | 0.583  | 0.01267 | Uiso | 1 | -0.491434 |
| O12 | O | 0.0351 | 0.9599 | 0.6283 | 0.01267 | Uiso | 1 | -0.474507 |
| O13 | O | 0.388  | 0.4653 | 0.7085 | 0.01267 | Uiso | 1 | -0.542892 |
| O14 | O | 0.4869 | 0.4267 | 0.6021 | 0.01267 | Uiso | 1 | -0.529207 |
| O15 | O | 0.2366 | 0.417  | 0.6992 | 0.01267 | Uiso | 1 | -0.489827 |
| O16 | O | 0.3366 | 0.3717 | 0.5882 | 0.01267 | Uiso | 1 | -0.473962 |
| O17 | O | 0.0965 | 0.7085 | 0.8262 | 0.01267 | Uiso | 1 | -0.542665 |
| O18 | O | 0.089  | 0.6021 | 0.9712 | 0.01267 | Uiso | 1 | -0.530011 |
| O19 | O | 0.9358 | 0.6992 | 0.8838 | 0.01267 | Uiso | 1 | -0.489465 |
| O20 | O | 0.9248 | 0.5882 | 0.0401 | 0.01267 | Uiso | 1 | -0.47495  |
| O21 | O | 0.9227 | 0.8262 | 0.4653 | 0.01267 | Uiso | 1 | -0.542926 |
| O22 | O | 0.0602 | 0.9712 | 0.4267 | 0.01267 | Uiso | 1 | -0.530691 |
| O23 | O | 0.8196 | 0.8838 | 0.417  | 0.01267 | Uiso | 1 | -0.491824 |
| O24 | O | 0.9649 | 0.0401 | 0.3717 | 0.01267 | Uiso | 1 | -0.475653 |

data\_ZUGDEM\_clean  
\_cell\_length\_a 14.2079  
\_cell\_length\_b 17.2295  
\_cell\_length\_c 26.1584  
\_cell\_angle\_alpha 88.764  
\_cell\_angle\_beta 74.47  
\_cell\_angle\_gamma 70.377

\_symmetry\_space\_group\_name\_H-M P 1  
\_symmetry\_int\_tables\_number 1

loop\_  
\_symmetry\_equiv\_pos\_as\_xyz  
'x,y,z'

loop\_  
\_atom\_site\_label  
\_atom\_site\_occupancy  
\_atom\_site\_fract\_x  
\_atom\_site\_fract\_y  
\_atom\_site\_fract\_z  
\_atom\_site\_thermal\_displace\_type  
\_atom\_site\_B\_iso\_or\_equiv  
\_atom\_site\_type\_symbol  
\_atom\_site\_charge

|     |   |         |         |         |      |   |    |           |
|-----|---|---------|---------|---------|------|---|----|-----------|
| Zn1 | 1 | 0.11005 | 0.79977 | 0.42005 | Biso | 1 | Zn | 0.874119  |
| Zn2 | 1 | 0.17306 | 0.61911 | 0.47782 | Biso | 1 | Zn | 0.876684  |
| Zn3 | 1 | 0.46896 | 0.21843 | 0.70865 | Biso | 1 | Zn | 0.881063  |
| Zn4 | 1 | 0.6662  | 0.11612 | 0.00883 | Biso | 1 | Zn | 0.874653  |
| Zn5 | 1 | 0.85584 | 0.27887 | 0.19851 | Biso | 1 | Zn | 0.901765  |
| Zn6 | 1 | 0.57025 | 0.31381 | 0.07135 | Biso | 1 | Zn | 0.866932  |
| C1  | 1 | 0.3264  | 0.671   | 0.3953  | Biso | 1 | C  | 0.307431  |
| C2  | 1 | 0.3238  | 0.7872  | 0.3632  | Biso | 1 | C  | 0.189455  |
| H1  | 1 | 0.299   | 0.8425  | 0.3563  | Biso | 1 | H  | 0.104780  |
| C3  | 1 | 0.4255  | 0.6612  | 0.3633  | Biso | 1 | C  | -0.054038 |
| C4  | 1 | 0.5024  | 0.5844  | 0.3533  | Biso | 1 | C  | 0.438995  |
| C5  | 1 | 0.3841  | 0.536   | 0.409   | Biso | 1 | C  | 0.250338  |
| H2  | 1 | 0.3729  | 0.491   | 0.4265  | Biso | 1 | H  | 0.082413  |
| C6  | 1 | 0.0575  | 0.8294  | 0.5882  | Biso | 1 | C  | -0.019519 |
| C7  | 1 | 0.0842  | 0.794   | 0.6323  | Biso | 1 | C  | -0.094075 |
| H3  | 1 | 0.1226  | 0.738   | 0.6304  | Biso | 1 | H  | 0.142199  |
| C8  | 1 | 0.0541  | 0.8416  | 0.679   | Biso | 1 | C  | -0.021444 |
| C9  | 1 | 0.0056  | 0.9271  | 0.6798  | Biso | 1 | C  | -0.114078 |
| H4  | 1 | 0.9849  | 0.9597  | 0.7115  | Biso | 1 | H  | 0.132211  |
| C10 | 1 | 0.9882  | 0.9638  | 0.6342  | Biso | 1 | C  | -0.015718 |
| C11 | 1 | 0.0137  | 0.9152  | 0.5888  | Biso | 1 | C  | -0.108239 |
| H5  | 1 | 0.0019  | 0.9393  | 0.5579  | Biso | 1 | H  | 0.136279  |
| C12 | 1 | 0.0869  | 0.7798  | 0.5372  | Biso | 1 | C  | 0.592810  |
| C13 | 1 | 0.0829  | 0.8095  | 0.7275  | Biso | 1 | C  | 0.605582  |
| C14 | 1 | 0.9375  | 0.0557  | 0.6347  | Biso | 1 | C  | 0.550072  |

|     |   |        |        |         |      |   |   |           |
|-----|---|--------|--------|---------|------|---|---|-----------|
| C15 | 1 | 0.1899 | 0.4207 | 0.5731  | Biso | 1 | C | -0.009027 |
| C16 | 1 | 0.245  | 0.376  | 0.6073  | Biso | 1 | C | -0.125562 |
| H6  | 1 | 0.2987 | 0.3902 | 0.6136  | Biso | 1 | H | 0.119741  |
| C17 | 1 | 0.2202 | 0.31   | 0.6319  | Biso | 1 | C | -0.012422 |
| C18 | 1 | 0.1379 | 0.2917 | 0.624   | Biso | 1 | C | -0.111721 |
| H7  | 1 | 0.1192 | 0.2489 | 0.6408  | Biso | 1 | H | 0.143996  |
| C19 | 1 | 0.0834 | 0.3377 | 0.5907  | Biso | 1 | C | -0.013308 |
| C20 | 1 | 0.1085 | 0.4033 | 0.566   | Biso | 1 | C | -0.109440 |
| H8  | 1 | 0.0693 | 0.4349 | 0.5447  | Biso | 1 | H | 0.138571  |
| C21 | 1 | 0.2141 | 0.4928 | 0.5452  | Biso | 1 | C | 0.549785  |
| C22 | 1 | 0.2792 | 0.2616 | 0.6689  | Biso | 1 | C | 0.569659  |
| C23 | 1 | 0.9952 | 0.3161 | 0.581   | Biso | 1 | C | 0.593745  |
| C24 | 1 | 0.5274 | 0.3165 | 0.8297  | Biso | 1 | C | -0.000814 |
| C25 | 1 | 0.5716 | 0.2699 | 0.8675  | Biso | 1 | C | -0.099096 |
| H9  | 1 | 0.5962 | 0.2125 | 0.8629  | Biso | 1 | H | 0.137995  |
| C26 | 1 | 0.5786 | 0.3078 | 0.9106  | Biso | 1 | C | -0.018187 |
| C27 | 1 | 0.5531 | 0.3923 | 0.9149  | Biso | 1 | C | -0.103410 |
| H10 | 1 | 0.558  | 0.4179 | 0.9446  | Biso | 1 | H | 0.136521  |
| C28 | 1 | 0.5195 | 0.4405 | 0.8741  | Biso | 1 | C | -0.008630 |
| C29 | 1 | 0.5048 | 0.4017 | 0.8336  | Biso | 1 | C | -0.123623 |
| H11 | 1 | 0.479  | 0.433  | 0.8078  | Biso | 1 | H | 0.128231  |
| C30 | 1 | 0.5113 | 0.2756 | 0.7859  | Biso | 1 | C | 0.566369  |
| C31 | 1 | 0.6156 | 0.2602 | 0.9547  | Biso | 1 | C | 0.599923  |
| C32 | 1 | 0.4896 | 0.5338 | 0.8799  | Biso | 1 | C | 0.545028  |
| C33 | 1 | 0.1653 | 0.2317 | 0.1224  | Biso | 1 | C | -0.025753 |
| C34 | 1 | 0.1754 | 0.1531 | 0.098   | Biso | 1 | C | -0.107833 |
| H12 | 1 | 0.1177 | 0.1373 | 0.1014  | Biso | 1 | H | 0.121550  |
| C35 | 1 | 0.2783 | 0.1003 | 0.0682  | Biso | 1 | C | -0.011634 |
| C36 | 1 | 0.3609 | 0.1211 | 0.0639  | Biso | 1 | C | -0.105259 |
| H13 | 1 | 0.426  | 0.0852 | 0.045   | Biso | 1 | H | 0.139055  |
| C37 | 1 | 0.3525 | 0.197  | 0.0875  | Biso | 1 | C | -0.014040 |
| C38 | 1 | 0.2562 | 0.2504 | 0.1169  | Biso | 1 | C | -0.106825 |
| H14 | 1 | 0.2519 | 0.2994 | 0.1332  | Biso | 1 | H | 0.141659  |
| C39 | 1 | 0.0651 | 0.2828 | 0.1534  | Biso | 1 | C | 0.566758  |
| C40 | 1 | 0.2833 | 0.0216 | 0.0433  | Biso | 1 | C | 0.558285  |
| C41 | 1 | 0.8272 | 0.1591 | 0.1168  | Biso | 1 | C | -0.038521 |
| C42 | 1 | 0.4492 | 0.2177 | 0.0803  | Biso | 1 | C | 0.596077  |
| C43 | 1 | 0.7077 | 0.2757 | 0.1412  | Biso | 1 | C | 0.181487  |
| H15 | 1 | 0.666  | 0.3261 | 0.16    | Biso | 1 | H | 0.094867  |
| C44 | 1 | 0.7613 | 0.171  | 0.086   | Biso | 1 | C | 0.295321  |
| C45 | 1 | 0.8557 | 0.0496 | 0.041   | Biso | 1 | C | 0.242379  |
| H16 | 1 | 0.868  | 0.0115 | 0.0132  | Biso | 1 | H | 0.074651  |
| C46 | 1 | 0.9101 | 0.0854 | 0.1076  | Biso | 1 | C | 0.421345  |
| N1  | 1 | 0.9262 | 0.0296 | 0.0676  | Biso | 1 | N | -0.372357 |
| N2  | 1 | 0.9796 | 0.0666 | 0.1368  | Biso | 1 | N | -0.639743 |
| H17 | 1 | 0.0313 | 0.0208 | 0.1295  | Biso | 1 | H | 0.370550  |
| H18 | 1 | 0.9721 | 0.1004 | 0.1625  | Biso | 1 | H | 0.354436  |
| N3  | 1 | 0.7939 | 0.2284 | 0.15268 | Biso | 1 | N | -0.329468 |
| N4  | 1 | 0.6846 | 0.2467 | 0.1015  | Biso | 1 | N | -0.366062 |
| N5  | 1 | 0.7696 | 0.1154 | 0.0474  | Biso | 1 | N | -0.356945 |
| N6  | 1 | 0.3013 | 0.6072 | 0.4206  | Biso | 1 | N | -0.383656 |
| N7  | 1 | 0.2621 | 0.7486 | 0.3951  | Biso | 1 | N | -0.393084 |

|      |   |         |         |         |         |         |      |           |    |          |
|------|---|---------|---------|---------|---------|---------|------|-----------|----|----------|
| N8   | 1 | 0.4218  | 0.739   | 0.3431  | Biso    | 1       | N    | -0.316733 |    |          |
| N9   | 1 | 0.6002  | 0.5652  | 0.3227  | Biso    | 1       | N    | -0.627709 |    |          |
| H19  | 1 | 0.6423  | 0.515   | 0.3191  | Biso    | 1       | H    | 0.369473  |    |          |
| H20  | 1 | 0.621   | 0.603   | 0.3066  | Biso    | 1       | H    | 0.359840  |    |          |
| N10  | 1 | 0.4757  | 0.5209  | 0.3774  | Biso    | 1       | N    | -0.385366 |    |          |
| O1   | 1 | 0.0595  | 0.8139  | 0.49839 | Biso    | 1       | O    | -0.530812 |    |          |
| O2   | 1 | 0.1382  | 0.7016  | 0.53611 | Biso    | 1       | O    | -0.553559 |    |          |
| O3   | 1 | 0.1311  | 0.7303  | 0.7275  | Biso    | 1       | O    | -0.584810 |    |          |
| O4   | 1 | 0.0613  | 0.8493  | 0.7676  | Biso    | 1       | O    | -0.539143 |    |          |
| O5   | 1 | 0.8902  | 0.1028  | 0.6755  | Biso    | 1       | O    | -0.405065 |    |          |
| O6   | 1 | 0.9427  | 0.084   | 0.58846 | Biso    | 1       | O    | -0.502862 |    |          |
| O7   | 1 | 0.2731  | 0.5236  | 0.5594  | Biso    | 1       | O    | -0.397797 |    |          |
| O8   | 1 | 0.1755  | 0.5145  | 0.50765 | Biso    | 1       | O    | -0.489008 |    |          |
| O9   | 1 | 0.9443  | 0.3613  | 0.55147 | Biso    | 1       | O    | -0.554482 |    |          |
| O10  | 1 | 0.9744  | 0.253   | 0.60208 | Biso    | 1       | O    | -0.539041 |    |          |
| O11  | 1 | 0.2498  | 0.2083  | 0.6938  | Biso    | 1       | O    | -0.449216 |    |          |
| O12  | 1 | 0.3583  | 0.2767  | 0.67165 | Biso    | 1       | O    | -0.544668 |    |          |
| O13  | 1 | 0.4902  | 0.5715  | 0.8362  | Biso    | 1       | O    | -0.449018 |    |          |
| O14  | 1 | 0.469   | 0.5672  | 0.924   | Biso    | 1       | O    | -0.454885 |    |          |
| O15  | 1 | 0.4346  | 0.3177  | 0.7671  | Biso    | 1       | O    | -0.568678 |    |          |
| O16  | 1 | 0.5593  | 0.2011  | 0.77018 | Biso    | 1       | O    | -0.514669 |    |          |
| O17  | 1 | 0.622   | 0.3     | 0.99361 | Biso    | 1       | O    | -0.574228 |    |          |
| O18  | 1 | 0.6346  | 0.1849  | 0.9503  | Biso    | 1       | O    | -0.502145 |    |          |
| O19  | 1 | 0.0595  | 0.3377  | 0.187   | Biso    | 1       | O    | -0.381381 |    |          |
| O20  | 1 | 0.9864  | 0.2708  | 0.1465  | Biso    | 1       | O    | -0.541377 |    |          |
| O21  | 1 | 0.2131  | 0.9914  | 0.0574  | Biso    | 1       | O    | -0.509734 |    |          |
| O22  | 1 | 0.3642  | 0.9855  | 0.0059  | Biso    | 1       | O    | -0.501066 |    |          |
| O23  | 1 | 0.5336  | 0.1637  | 0.0684  | Biso    | 1       | O    | -0.543179 |    |          |
| O24  | 1 | 0.4356  | 0.2959  | 0.0884  | Biso    | 1       | O    | -0.547574 |    |          |
| Zn7  | 1 | 0.88995 |         | 0.20023 |         | 0.57995 | Biso | 1         | Zn | 0.874438 |
| Zn8  | 1 | 0.82694 |         | 0.38089 |         | 0.52218 | Biso | 1         | Zn | 0.877906 |
| Zn9  | 1 | 0.53104 |         | 0.78157 |         | 0.29135 | Biso | 1         | Zn | 0.880251 |
| Zn10 | 1 | 0.3338  | 0.88388 |         | 0.99117 |         | Biso | 1         | Zn | 0.874259 |
| Zn11 | 1 | 0.14416 |         | 0.72113 |         | 0.80149 | Biso | 1         | Zn | 0.900864 |
| Zn12 | 1 | 0.42975 |         | 0.68619 |         | 0.92865 | Biso | 1         | Zn | 0.867030 |
| C47  | 1 | 0.6736  | 0.329   | 0.6047  | Biso    | 1       | C    | 0.307267  |    |          |
| C48  | 1 | 0.6762  | 0.2128  | 0.6368  | Biso    | 1       | C    | 0.189241  |    |          |
| H21  | 1 | 0.701   | 0.1575  | 0.6437  | Biso    | 1       | H    | 0.104467  |    |          |
| C49  | 1 | 0.5745  | 0.3388  | 0.6367  | Biso    | 1       | C    | -0.054393 |    |          |
| C50  | 1 | 0.4976  | 0.4156  | 0.6467  | Biso    | 1       | C    | 0.438500  |    |          |
| C51  | 1 | 0.6159  | 0.464   | 0.591   | Biso    | 1       | C    | 0.250607  |    |          |
| H22  | 1 | 0.6271  | 0.509   | 0.5735  | Biso    | 1       | H    | 0.082745  |    |          |
| C52  | 1 | 0.9425  | 0.1706  | 0.4118  | Biso    | 1       | C    | -0.019019 |    |          |
| C53  | 1 | 0.9158  | 0.206   | 0.3677  | Biso    | 1       | C    | -0.093790 |    |          |
| H23  | 1 | 0.8774  | 0.262   | 0.3696  | Biso    | 1       | H    | 0.142513  |    |          |
| C54  | 1 | 0.9459  | 0.1584  | 0.321   | Biso    | 1       | C    | -0.021027 |    |          |
| C55  | 1 | 0.9944  | 0.0729  | 0.3202  | Biso    | 1       | C    | -0.114456 |    |          |
| H24  | 1 | 0.0151  | 0.0403  | 0.2885  | Biso    | 1       | H    | 0.132543  |    |          |
| C56  | 1 | 0.0118  | 0.0362  | 0.3658  | Biso    | 1       | C    | -0.015910 |    |          |
| C57  | 1 | 0.9863  | 0.0848  | 0.4112  | Biso    | 1       | C    | -0.108474 |    |          |
| H25  | 1 | 0.9981  | 0.0607  | 0.4421  | Biso    | 1       | H    | 0.135918  |    |          |
| C58  | 1 | 0.9131  | 0.2202  | 0.4628  | Biso    | 1       | C    | 0.592616  |    |          |

|     |   |        |        |         |      |   |   |           |
|-----|---|--------|--------|---------|------|---|---|-----------|
| C59 | 1 | 0.9171 | 0.1905 | 0.2725  | Biso | 1 | C | 0.604418  |
| C60 | 1 | 0.0625 | 0.9443 | 0.3653  | Biso | 1 | C | 0.549899  |
| C61 | 1 | 0.8101 | 0.5793 | 0.4269  | Biso | 1 | C | -0.006911 |
| C62 | 1 | 0.755  | 0.624  | 0.3927  | Biso | 1 | C | -0.126420 |
| H26 | 1 | 0.7013 | 0.6098 | 0.3864  | Biso | 1 | H | 0.119958  |
| C63 | 1 | 0.7798 | 0.69   | 0.3681  | Biso | 1 | C | -0.012884 |
| C64 | 1 | 0.8621 | 0.7083 | 0.376   | Biso | 1 | C | -0.112176 |
| H27 | 1 | 0.8808 | 0.7511 | 0.3592  | Biso | 1 | H | 0.144151  |
| C65 | 1 | 0.9166 | 0.6623 | 0.4093  | Biso | 1 | C | -0.014120 |
| C66 | 1 | 0.8915 | 0.5967 | 0.434   | Biso | 1 | C | -0.109068 |
| H28 | 1 | 0.9307 | 0.5651 | 0.4553  | Biso | 1 | H | 0.138442  |
| C67 | 1 | 0.7859 | 0.5072 | 0.4548  | Biso | 1 | C | 0.552618  |
| C68 | 1 | 0.7208 | 0.7384 | 0.3311  | Biso | 1 | C | 0.569048  |
| C69 | 1 | 0.0048 | 0.6839 | 0.419   | Biso | 1 | C | 0.593911  |
| C70 | 1 | 0.4726 | 0.6835 | 0.1703  | Biso | 1 | C | -0.002082 |
| C71 | 1 | 0.4284 | 0.7301 | 0.1325  | Biso | 1 | C | -0.101438 |
| H29 | 1 | 0.4038 | 0.7875 | 0.1371  | Biso | 1 | H | 0.137832  |
| C72 | 1 | 0.4214 | 0.6922 | 0.0894  | Biso | 1 | C | -0.018750 |
| C73 | 1 | 0.4469 | 0.6077 | 0.0851  | Biso | 1 | C | -0.105974 |
| H30 | 1 | 0.442  | 0.5821 | 0.0554  | Biso | 1 | H | 0.136037  |
| C74 | 1 | 0.4805 | 0.5595 | 0.1259  | Biso | 1 | C | -0.009389 |
| C75 | 1 | 0.4952 | 0.5983 | 0.1664  | Biso | 1 | C | -0.122678 |
| H31 | 1 | 0.521  | 0.567  | 0.1922  | Biso | 1 | H | 0.127588  |
| C76 | 1 | 0.4887 | 0.7244 | 0.2141  | Biso | 1 | C | 0.567311  |
| C77 | 1 | 0.3844 | 0.7398 | 0.0453  | Biso | 1 | C | 0.600216  |
| C78 | 1 | 0.5104 | 0.4662 | 0.1201  | Biso | 1 | C | 0.546225  |
| C79 | 1 | 0.8347 | 0.7683 | 0.8776  | Biso | 1 | C | -0.025759 |
| C80 | 1 | 0.8246 | 0.8469 | 0.902   | Biso | 1 | C | -0.110979 |
| H32 | 1 | 0.8823 | 0.8627 | 0.8986  | Biso | 1 | H | 0.121662  |
| C81 | 1 | 0.7217 | 0.8997 | 0.9318  | Biso | 1 | C | -0.010001 |
| C82 | 1 | 0.6391 | 0.8789 | 0.9361  | Biso | 1 | C | -0.102336 |
| H33 | 1 | 0.574  | 0.9148 | 0.955   | Biso | 1 | H | 0.139318  |
| C83 | 1 | 0.6475 | 0.803  | 0.9125  | Biso | 1 | C | -0.014858 |
| C84 | 1 | 0.7438 | 0.7496 | 0.8831  | Biso | 1 | C | -0.106237 |
| H34 | 1 | 0.7481 | 0.7006 | 0.8668  | Biso | 1 | H | 0.141491  |
| C85 | 1 | 0.9349 | 0.7172 | 0.8466  | Biso | 1 | C | 0.566247  |
| C86 | 1 | 0.7167 | 0.9784 | 0.9567  | Biso | 1 | C | 0.559151  |
| C87 | 1 | 0.1728 | 0.8409 | 0.8832  | Biso | 1 | C | -0.038274 |
| C88 | 1 | 0.5508 | 0.7823 | 0.9197  | Biso | 1 | C | 0.596710  |
| C89 | 1 | 0.2923 | 0.7243 | 0.8588  | Biso | 1 | C | 0.181410  |
| H35 | 1 | 0.334  | 0.6739 | 0.84    | Biso | 1 | H | 0.094674  |
| C90 | 1 | 0.2387 | 0.829  | 0.914   | Biso | 1 | C | 0.295795  |
| C91 | 1 | 0.1443 | 0.9504 | 0.959   | Biso | 1 | C | 0.243292  |
| H36 | 1 | 0.132  | 0.9885 | 0.9868  | Biso | 1 | H | 0.075176  |
| C92 | 1 | 0.0899 | 0.9146 | 0.8924  | Biso | 1 | C | 0.420946  |
| N11 | 1 | 0.0738 | 0.9704 | 0.9324  | Biso | 1 | N | -0.370768 |
| N12 | 1 | 0.0204 | 0.9334 | 0.8632  | Biso | 1 | N | -0.636461 |
| H37 | 1 | 0.9687 | 0.9792 | 0.8705  | Biso | 1 | H | 0.370830  |
| H38 | 1 | 0.0279 | 0.8996 | 0.8375  | Biso | 1 | H | 0.354559  |
| N13 | 1 | 0.2061 | 0.7716 | 0.84732 | Biso | 1 | N | -0.328071 |
| N14 | 1 | 0.3154 | 0.7533 | 0.8985  | Biso | 1 | N | -0.366003 |
| N15 | 1 | 0.2304 | 0.8846 | 0.9526  | Biso | 1 | N | -0.355627 |

|     |   |        |        |         |      |   |   |           |
|-----|---|--------|--------|---------|------|---|---|-----------|
| N16 | 1 | 0.6987 | 0.3928 | 0.5794  | Biso | 1 | N | -0.383400 |
| N17 | 1 | 0.7379 | 0.2514 | 0.6049  | Biso | 1 | N | -0.392713 |
| N18 | 1 | 0.5782 | 0.261  | 0.6569  | Biso | 1 | N | -0.317398 |
| N19 | 1 | 0.3998 | 0.4348 | 0.6773  | Biso | 1 | N | -0.629654 |
| H39 | 1 | 0.3577 | 0.485  | 0.6809  | Biso | 1 | H | 0.369233  |
| H40 | 1 | 0.379  | 0.397  | 0.6934  | Biso | 1 | H | 0.359568  |
| N20 | 1 | 0.5243 | 0.4791 | 0.6226  | Biso | 1 | N | -0.385924 |
| O25 | 1 | 0.9405 | 0.1861 | 0.50161 | Biso | 1 | O | -0.532439 |
| O26 | 1 | 0.8618 | 0.2984 | 0.46389 | Biso | 1 | O | -0.552989 |
| O27 | 1 | 0.8689 | 0.2697 | 0.2725  | Biso | 1 | O | -0.582415 |
| O28 | 1 | 0.9387 | 0.1507 | 0.2324  | Biso | 1 | O | -0.535860 |
| O29 | 1 | 0.1098 | 0.8972 | 0.3245  | Biso | 1 | O | -0.402968 |
| O30 | 1 | 0.0573 | 0.916  | 0.41154 | Biso | 1 | O | -0.501552 |
| O31 | 1 | 0.7269 | 0.4764 | 0.4406  | Biso | 1 | O | -0.406334 |
| O32 | 1 | 0.8245 | 0.4855 | 0.49235 | Biso | 1 | O | -0.496772 |
| O33 | 1 | 0.0557 | 0.6387 | 0.44853 | Biso | 1 | O | -0.555044 |
| O34 | 1 | 0.0256 | 0.747  | 0.39792 | Biso | 1 | O | -0.539081 |
| O35 | 1 | 0.7502 | 0.7917 | 0.3062  | Biso | 1 | O | -0.441745 |
| O36 | 1 | 0.6417 | 0.7233 | 0.32835 | Biso | 1 | O | -0.543041 |
| O37 | 1 | 0.5098 | 0.4285 | 0.1638  | Biso | 1 | O | -0.457695 |
| O38 | 1 | 0.531  | 0.4328 | 0.076   | Biso | 1 | O | -0.457701 |
| O39 | 1 | 0.5654 | 0.6823 | 0.2329  | Biso | 1 | O | -0.571726 |
| O40 | 1 | 0.4407 | 0.7989 | 0.22982 | Biso | 1 | O | -0.516030 |
| O41 | 1 | 0.378  | 0.7    | 0.00639 | Biso | 1 | O | -0.574348 |
| O42 | 1 | 0.3654 | 0.8151 | 0.0497  | Biso | 1 | O | -0.502492 |
| O43 | 1 | 0.9405 | 0.6623 | 0.813   | Biso | 1 | O | -0.372649 |
| O44 | 1 | 0.0136 | 0.7292 | 0.8535  | Biso | 1 | O | -0.539682 |
| O45 | 1 | 0.7869 | 0.0086 | 0.9426  | Biso | 1 | O | -0.506847 |
| O46 | 1 | 0.6358 | 0.0145 | 0.9941  | Biso | 1 | O | -0.506056 |
| O47 | 1 | 0.4664 | 0.8363 | 0.9316  | Biso | 1 | O | -0.545188 |
| O48 | 1 | 0.5644 | 0.7041 | 0.9116  | Biso | 1 | O | -0.548147 |

```

data_BEPIX_clean
_audit_creation_date      2014-07-02
_audit_creation_method    'Materials Studio'
_symmetry_space_group_name_H-M  'P1'
_symmetry_Int_Tables_number  1
_symmetry_cell_setting    triclinic
loop_
_symmetry_equiv_pos_as_xyz
  x,y,z
_cell_length_a           10.3953
_cell_length_b           17.4542
_cell_length_c           17.4542
_cell_angle_alpha        120.0000
_cell_angle_beta         90.0000
_cell_angle_gamma        90.0000
loop_
_atom_site_label
_atom_site_type_symbol
_atom_site_fract_x
_atom_site_fract_y
_atom_site_fract_z
_atom_site_U_iso_or_equiv
_atom_site_adp_type
_atom_site_occupancy
_atom_site_charge
Zn1  Zn   0.88459   0.46662   0.92866   0.01267   Uiso  1   0.408194
Zn2  Zn   0.55126   0.46204   0.53338   0.01267   Uiso  1   0.406511
Zn3  Zn   0.21792   0.07134   0.53796   0.01267   Uiso  1   0.406895
Zn4  Zn   0.38459   0.53338   0.07134   0.01267   Uiso  1   0.408278
Zn5  Zn   0.05126   0.53796   0.46662   0.01267   Uiso  1   0.407774
Zn6  Zn   0.71792   0.92866   0.46204   0.01267   Uiso  1   0.407553
H1   H    0.789 0.5534 0.081 0.01267   Uiso  1   0.262831
H2   H    0.9707 0.7988 0.1793 0.01267   Uiso  1   0.124902
H3   H    0.9925 0.6286 0.1577 0.01267   Uiso  1   0.089935
H4   H    0.9232 0.8964 0.3262 0.01267   Uiso  1   0.086784
H5   H    0.7789 0.6445 0.0214 0.01267   Uiso  1   0.121979
H6   H    0.9256 0.665 0.0435 0.01267   Uiso  1   0.111797
H7   H    0.6355 0.6778 0.1595 0.01267   Uiso  1   0.109288
H8   H    0.5973 0.7768 0.3063 0.01267   Uiso  1   0.09467
H9   H    0.8363 0.4234 0.0707 0.01267   Uiso  1   0.136782
H10  H    0.8665 0.4043 0.1476 0.01267   Uiso  1   0.161639
H11  H    0.974 0.3919 0.0794 0.01267   Uiso  1   0.159268
H12  H    0.0223 0.5207 0.1984 0.01267   Uiso  1   0.065869
H13  H    0.8774 0.6333 0.2815 0.01267   Uiso  1   0.16067
H14  H    0.8352 0.5458 0.2789 0.01267   Uiso  1   0.15554
H15  H    0.7645 0.5765 0.2196 0.01267   Uiso  1   0.151465
H16  H    0.45567   0.5276 0.4466 0.01267   Uiso  1   0.262681
H17  H    0.63737   0.3805 0.2012 0.01267   Uiso  1   0.124603
H18  H    0.65917   0.5291 0.3714 0.01267   Uiso  1   0.089343
H19  H    0.58987   0.4298 0.1036 0.01267   Uiso  1   0.087263

```

|     |   |         |        |        |         |      |   |          |
|-----|---|---------|--------|--------|---------|------|---|----------|
| H20 | H | 0.44557 | 0.3769 | 0.3555 | 0.01267 | Uiso | 1 | 0.12159  |
| H21 | H | 0.59227 | 0.3785 | 0.335  | 0.01267 | Uiso | 1 | 0.11224  |
| H22 | H | 0.30217 | 0.4817 | 0.3222 | 0.01267 | Uiso | 1 | 0.108156 |
| H23 | H | 0.26397 | 0.5295 | 0.2232 | 0.01267 | Uiso | 1 | 0.094186 |
| H24 | H | 0.50297 | 0.6473 | 0.5766 | 0.01267 | Uiso | 1 | 0.136635 |
| H25 | H | 0.53317 | 0.7433 | 0.5957 | 0.01267 | Uiso | 1 | 0.161598 |
| H26 | H | 0.64067 | 0.6875 | 0.6081 | 0.01267 | Uiso | 1 | 0.158346 |
| H27 | H | 0.68897 | 0.6777 | 0.4793 | 0.01267 | Uiso | 1 | 0.065382 |
| H28 | H | 0.54407 | 0.6482 | 0.3667 | 0.01267 | Uiso | 1 | 0.160836 |
| H29 | H | 0.50187 | 0.7331 | 0.4542 | 0.01267 | Uiso | 1 | 0.155102 |
| H30 | H | 0.43117 | 0.6431 | 0.4235 | 0.01267 | Uiso | 1 | 0.151775 |
| H31 | H | 0.12233 | 0.919  | 0.4724 | 0.01267 | Uiso | 1 | 0.262057 |
| H32 | H | 0.30403 | 0.8207 | 0.6195 | 0.01267 | Uiso | 1 | 0.125702 |
| H33 | H | 0.32583 | 0.8423 | 0.4709 | 0.01267 | Uiso | 1 | 0.089525 |
| H34 | H | 0.25653 | 0.6738 | 0.5702 | 0.01267 | Uiso | 1 | 0.087047 |
| H35 | H | 0.11223 | 0.9786 | 0.6231 | 0.01267 | Uiso | 1 | 0.122334 |
| H36 | H | 0.25893 | 0.9565 | 0.6215 | 0.01267 | Uiso | 1 | 0.112238 |
| H37 | H | 0.96883 | 0.8405 | 0.5183 | 0.01267 | Uiso | 1 | 0.108051 |
| H38 | H | 0.93063 | 0.6937 | 0.4705 | 0.01267 | Uiso | 1 | 0.0947   |
| H39 | H | 0.16963 | 0.9293 | 0.3527 | 0.01267 | Uiso | 1 | 0.137324 |
| H40 | H | 0.19983 | 0.8524 | 0.2567 | 0.01267 | Uiso | 1 | 0.162004 |
| H41 | H | 0.30733 | 0.9206 | 0.3125 | 0.01267 | Uiso | 1 | 0.158948 |
| H42 | H | 0.35563 | 0.8016 | 0.3223 | 0.01267 | Uiso | 1 | 0.06527  |
| H43 | H | 0.21073 | 0.7185 | 0.3518 | 0.01267 | Uiso | 1 | 0.160818 |
| H44 | H | 0.16853 | 0.7211 | 0.2669 | 0.01267 | Uiso | 1 | 0.156499 |
| H45 | H | 0.09783 | 0.7804 | 0.3569 | 0.01267 | Uiso | 1 | 0.151806 |
| H46 | H | 0.289   | 0.4466 | 0.919  | 0.01267 | Uiso | 1 | 0.262658 |
| H47 | H | 0.4707  | 0.2012 | 0.8207 | 0.01267 | Uiso | 1 | 0.12502  |
| H48 | H | 0.4925  | 0.3714 | 0.8423 | 0.01267 | Uiso | 1 | 0.089895 |
| H49 | H | 0.4232  | 0.1036 | 0.6738 | 0.01267 | Uiso | 1 | 0.086854 |
| H50 | H | 0.2789  | 0.3555 | 0.9786 | 0.01267 | Uiso | 1 | 0.122067 |
| H51 | H | 0.4256  | 0.335  | 0.9565 | 0.01267 | Uiso | 1 | 0.111926 |
| H52 | H | 0.1355  | 0.3222 | 0.8405 | 0.01267 | Uiso | 1 | 0.109199 |
| H53 | H | 0.0973  | 0.2232 | 0.6937 | 0.01267 | Uiso | 1 | 0.094609 |
| H54 | H | 0.3363  | 0.5766 | 0.9293 | 0.01267 | Uiso | 1 | 0.13677  |
| H55 | H | 0.3665  | 0.5957 | 0.8524 | 0.01267 | Uiso | 1 | 0.161535 |
| H56 | H | 0.474   | 0.6081 | 0.9206 | 0.01267 | Uiso | 1 | 0.159339 |
| H57 | H | 0.5223  | 0.4793 | 0.8016 | 0.01267 | Uiso | 1 | 0.065746 |
| H58 | H | 0.3774  | 0.3667 | 0.7185 | 0.01267 | Uiso | 1 | 0.16071  |
| H59 | H | 0.3352  | 0.4542 | 0.7211 | 0.01267 | Uiso | 1 | 0.155463 |
| H60 | H | 0.2645  | 0.4235 | 0.7804 | 0.01267 | Uiso | 1 | 0.151424 |
| H61 | H | 0.95567 | 0.4724 | 0.5534 | 0.01267 | Uiso | 1 | 0.262688 |
| H62 | H | 0.13737 | 0.6195 | 0.7988 | 0.01267 | Uiso | 1 | 0.124722 |
| H63 | H | 0.15917 | 0.4709 | 0.6286 | 0.01267 | Uiso | 1 | 0.089368 |
| H64 | H | 0.08987 | 0.5702 | 0.8964 | 0.01267 | Uiso | 1 | 0.087415 |
| H65 | H | 0.94557 | 0.6231 | 0.6445 | 0.01267 | Uiso | 1 | 0.121702 |
| H66 | H | 0.09227 | 0.6215 | 0.665  | 0.01267 | Uiso | 1 | 0.11232  |
| H67 | H | 0.80217 | 0.5183 | 0.6778 | 0.01267 | Uiso | 1 | 0.108113 |
| H68 | H | 0.76397 | 0.4705 | 0.7768 | 0.01267 | Uiso | 1 | 0.0943   |
| H69 | H | 0.00297 | 0.3527 | 0.4234 | 0.01267 | Uiso | 1 | 0.136579 |
| H70 | H | 0.03317 | 0.2567 | 0.4043 | 0.01267 | Uiso | 1 | 0.161648 |
| H71 | H | 0.14067 | 0.3125 | 0.3919 | 0.01267 | Uiso | 1 | 0.158369 |

|     |   |         |        |        |         |      |   |           |
|-----|---|---------|--------|--------|---------|------|---|-----------|
| H72 | H | 0.18897 | 0.3223 | 0.5207 | 0.01267 | Uiso | 1 | 0.065405  |
| H73 | H | 0.04407 | 0.3518 | 0.6333 | 0.01267 | Uiso | 1 | 0.160898  |
| H74 | H | 0.00187 | 0.2669 | 0.5458 | 0.01267 | Uiso | 1 | 0.155135  |
| H75 | H | 0.93117 | 0.3569 | 0.5765 | 0.01267 | Uiso | 1 | 0.151763  |
| H76 | H | 0.62233 | 0.081  | 0.5276 | 0.01267 | Uiso | 1 | 0.262103  |
| H77 | H | 0.80403 | 0.1793 | 0.3805 | 0.01267 | Uiso | 1 | 0.12569   |
| H78 | H | 0.82583 | 0.1577 | 0.5291 | 0.01267 | Uiso | 1 | 0.089377  |
| H79 | H | 0.75653 | 0.3262 | 0.4298 | 0.01267 | Uiso | 1 | 0.086795  |
| H80 | H | 0.61223 | 0.0214 | 0.3769 | 0.01267 | Uiso | 1 | 0.122387  |
| H81 | H | 0.75893 | 0.0435 | 0.3785 | 0.01267 | Uiso | 1 | 0.112177  |
| H82 | H | 0.46883 | 0.1595 | 0.4817 | 0.01267 | Uiso | 1 | 0.108049  |
| H83 | H | 0.43063 | 0.3063 | 0.5295 | 0.01267 | Uiso | 1 | 0.094703  |
| H84 | H | 0.66963 | 0.0707 | 0.6473 | 0.01267 | Uiso | 1 | 0.137361  |
| H85 | H | 0.69983 | 0.1476 | 0.7433 | 0.01267 | Uiso | 1 | 0.162079  |
| H86 | H | 0.80733 | 0.0794 | 0.6875 | 0.01267 | Uiso | 1 | 0.158964  |
| H87 | H | 0.85563 | 0.1984 | 0.6777 | 0.01267 | Uiso | 1 | 0.065225  |
| H88 | H | 0.71073 | 0.2815 | 0.6482 | 0.01267 | Uiso | 1 | 0.160793  |
| H89 | H | 0.66853 | 0.2789 | 0.7331 | 0.01267 | Uiso | 1 | 0.156537  |
| H90 | H | 0.59783 | 0.2196 | 0.6431 | 0.01267 | Uiso | 1 | 0.151863  |
| C1  | C | 0.0907  | 0.5249 | 0.0576 | 0.01267 | Uiso | 1 | 0.565546  |
| C2  | C | 0.8956  | 0.792  | 0.2042 | 0.01267 | Uiso | 1 | -0.221882 |
| C3  | C | 0.9723  | 0.5665 | 0.1161 | 0.01267 | Uiso | 1 | -0.072111 |
| C4  | C | 0.8658  | 0.8511 | 0.2924 | 0.01267 | Uiso | 1 | 0.031031  |
| C5  | C | 0.812   | 0.7232 | 0.1543 | 0.01267 | Uiso | 1 | 0.100234  |
| C6  | C | 0.8463  | 0.65   | 0.0623 | 0.01267 | Uiso | 1 | -0.132888 |
| C7  | C | 0.6969  | 0.7203 | 0.1928 | 0.01267 | Uiso | 1 | -0.217681 |
| C8  | C | 0.6736  | 0.7807 | 0.2806 | 0.01267 | Uiso | 1 | 0.051128  |
| C9  | C | 0.9009  | 0.4267 | 0.1116 | 0.01267 | Uiso | 1 | -0.532361 |
| C10 | C | 0.9417  | 0.5221 | 0.17   | 0.01267 | Uiso | 1 | 0.118462  |
| C11 | C | 0.8458  | 0.5742 | 0.2443 | 0.01267 | Uiso | 1 | -0.523969 |
| C12 | C | 0.75737 | 0.5327 | 0.4751 | 0.01267 | Uiso | 1 | 0.564603  |
| C13 | C | 0.56227 | 0.4122 | 0.208  | 0.01267 | Uiso | 1 | -0.221995 |
| C14 | C | 0.63897 | 0.5496 | 0.4335 | 0.01267 | Uiso | 1 | -0.07263  |
| C15 | C | 0.53247 | 0.4413 | 0.1489 | 0.01267 | Uiso | 1 | 0.030514  |
| C16 | C | 0.47867 | 0.4311 | 0.2768 | 0.01267 | Uiso | 1 | 0.101068  |
| C17 | C | 0.51297 | 0.4123 | 0.35   | 0.01267 | Uiso | 1 | -0.133426 |
| C18 | C | 0.36357 | 0.4725 | 0.2797 | 0.01267 | Uiso | 1 | -0.216133 |
| C19 | C | 0.34027 | 0.4999 | 0.2193 | 0.01267 | Uiso | 1 | 0.051624  |
| C20 | C | 0.56757 | 0.6849 | 0.5733 | 0.01267 | Uiso | 1 | -0.530992 |
| C21 | C | 0.60837 | 0.6479 | 0.4779 | 0.01267 | Uiso | 1 | 0.119571  |
| C22 | C | 0.51247 | 0.6701 | 0.4258 | 0.01267 | Uiso | 1 | -0.524495 |
| C23 | C | 0.42403 | 0.9424 | 0.4673 | 0.01267 | Uiso | 1 | 0.565404  |
| C24 | C | 0.22893 | 0.7958 | 0.5878 | 0.01267 | Uiso | 1 | -0.223838 |
| C25 | C | 0.30563 | 0.8839 | 0.4504 | 0.01267 | Uiso | 1 | -0.073016 |
| C26 | C | 0.19913 | 0.7076 | 0.5587 | 0.01267 | Uiso | 1 | 0.031931  |
| C27 | C | 0.14533 | 0.8457 | 0.5689 | 0.01267 | Uiso | 1 | 0.10199   |
| C28 | C | 0.17963 | 0.9377 | 0.5877 | 0.01267 | Uiso | 1 | -0.134193 |
| C29 | C | 0.03023 | 0.8072 | 0.5275 | 0.01267 | Uiso | 1 | -0.216273 |
| C30 | C | 0.00693 | 0.7194 | 0.5001 | 0.01267 | Uiso | 1 | 0.051014  |
| C31 | C | 0.23423 | 0.8884 | 0.3151 | 0.01267 | Uiso | 1 | -0.533006 |
| C32 | C | 0.27503 | 0.83   | 0.3521 | 0.01267 | Uiso | 1 | 0.120376  |
| C33 | C | 0.17913 | 0.7557 | 0.3299 | 0.01267 | Uiso | 1 | -0.526042 |

|     |   |         |        |        |         |         |      |           |           |
|-----|---|---------|--------|--------|---------|---------|------|-----------|-----------|
| C34 | C | 0.5907  | 0.4751 | 0.9424 | 0.01267 | Uiso    | 1    | 0.565613  |           |
| C35 | C | 0.3956  | 0.208  | 0.7958 | 0.01267 | Uiso    | 1    | -0.221747 |           |
| C36 | C | 0.4723  | 0.4335 | 0.8839 | 0.01267 | Uiso    | 1    | -0.072053 |           |
| C37 | C | 0.3658  | 0.1489 | 0.7076 | 0.01267 | Uiso    | 1    | 0.031124  |           |
| C38 | C | 0.312   | 0.2768 | 0.8457 | 0.01267 | Uiso    | 1    | 0.100433  |           |
| C39 | C | 0.3463  | 0.35   | 0.9377 | 0.01267 | Uiso    | 1    | -0.132818 |           |
| C40 | C | 0.1969  | 0.2797 | 0.8072 | 0.01267 | Uiso    | 1    | -0.21768  |           |
| C41 | C | 0.1736  | 0.2193 | 0.7194 | 0.01267 | Uiso    | 1    | 0.051311  |           |
| C42 | C | 0.4009  | 0.5733 | 0.8884 | 0.01267 | Uiso    | 1    | -0.532361 |           |
| C43 | C | 0.4417  | 0.4779 | 0.83   | 0.01267 | Uiso    | 1    | 0.118351  |           |
| C44 | C | 0.3458  | 0.4258 | 0.7557 | 0.01267 | Uiso    | 1    | -0.523993 |           |
| C45 | C | 0.25737 |        | 0.4673 | 0.5249  | 0.01267 | Uiso | 1         | 0.564644  |
| C46 | C | 0.06227 |        | 0.5878 | 0.792   | 0.01267 | Uiso | 1         | -0.221912 |
| C47 | C | 0.13897 |        | 0.4504 | 0.5665  | 0.01267 | Uiso | 1         | -0.072724 |
| C48 | C | 0.03247 |        | 0.5587 | 0.8511  | 0.01267 | Uiso | 1         | 0.030966  |
| C49 | C | 0.97867 |        | 0.5689 | 0.7232  | 0.01267 | Uiso | 1         | 0.101455  |
| C50 | C | 0.01297 |        | 0.5877 | 0.65    | 0.01267 | Uiso | 1         | -0.133457 |
| C51 | C | 0.86357 |        | 0.5275 | 0.7203  | 0.01267 | Uiso | 1         | -0.215874 |
| C52 | C | 0.84027 |        | 0.5001 | 0.7807  | 0.01267 | Uiso | 1         | 0.052056  |
| C53 | C | 0.06757 |        | 0.3151 | 0.4267  | 0.01267 | Uiso | 1         | -0.530992 |
| C54 | C | 0.10837 |        | 0.3521 | 0.5221  | 0.01267 | Uiso | 1         | 0.11956   |
| C55 | C | 0.01247 |        | 0.3299 | 0.5742  | 0.01267 | Uiso | 1         | -0.524613 |
| C56 | C | 0.92403 |        | 0.0576 | 0.5327  | 0.01267 | Uiso | 1         | 0.565214  |
| C57 | C | 0.72893 |        | 0.2042 | 0.4122  | 0.01267 | Uiso | 1         | -0.223866 |
| C58 | C | 0.80563 |        | 0.1161 | 0.5496  | 0.01267 | Uiso | 1         | -0.072833 |
| C59 | C | 0.69913 |        | 0.2924 | 0.4413  | 0.01267 | Uiso | 1         | 0.032305  |
| C60 | C | 0.64533 |        | 0.1543 | 0.4311  | 0.01267 | Uiso | 1         | 0.102165  |
| C61 | C | 0.67963 |        | 0.0623 | 0.4123  | 0.01267 | Uiso | 1         | -0.134068 |
| C62 | C | 0.53023 |        | 0.1928 | 0.4725  | 0.01267 | Uiso | 1         | -0.216236 |
| C63 | C | 0.50693 |        | 0.2806 | 0.4999  | 0.01267 | Uiso | 1         | 0.051267  |
| C64 | C | 0.73423 |        | 0.1116 | 0.6849  | 0.01267 | Uiso | 1         | -0.532958 |
| C65 | C | 0.77503 |        | 0.17   | 0.6479  | 0.01267 | Uiso | 1         | 0.120161  |
| C66 | C | 0.67913 |        | 0.2443 | 0.6701  | 0.01267 | Uiso | 1         | -0.526156 |
| N1  | N | 0.7578  | 0.8444 | 0.3297 | 0.01267 | Uiso    | 1    | -0.20862  |           |
| N2  | N | 0.8623  | 0.5647 | 0.06   | 0.01267 | Uiso    | 1    | -0.294578 |           |
| N3  | N | 0.42447 |        | 0.4853 | 0.1556  | 0.01267 | Uiso | 1         | -0.208965 |
| N4  | N | 0.52897 |        | 0.4953 | 0.4353  | 0.01267 | Uiso | 1         | -0.293173 |
| N5  | N | 0.09113 |        | 0.6703 | 0.5147  | 0.01267 | Uiso | 1         | -0.209486 |
| N6  | N | 0.19563 |        | 0.94   | 0.5047  | 0.01267 | Uiso | 1         | -0.292962 |
| N7  | N | 0.2578  | 0.1556 | 0.6703 | 0.01267 | Uiso    | 1    | -0.208405 |           |
| N8  | N | 0.3623  | 0.4353 | 0.94   | 0.01267 | Uiso    | 1    | -0.294393 |           |
| N9  | N | 0.92447 |        | 0.5147 | 0.8444  | 0.01267 | Uiso | 1         | -0.208555 |
| N10 | N | 0.02897 |        | 0.5047 | 0.5647  | 0.01267 | Uiso | 1         | -0.293267 |
| N11 | N | 0.59113 |        | 0.3297 | 0.4853  | 0.01267 | Uiso | 1         | -0.209205 |
| N12 | N | 0.69563 |        | 0.06   | 0.4953  | 0.01267 | Uiso | 1         | -0.29305  |
| O1  | O | 0.1927  | 0.5339 | 0.0993 | 0.01267 | Uiso    | 1    | -0.539634 |           |
| O2  | O | 0.081   | 0.486  | 0.9745 | 0.01267 | Uiso    | 1    | -0.524859 |           |
| O3  | O | 0.85937 |        | 0.5654 | 0.4661  | 0.01267 | Uiso | 1         | -0.53936  |
| O4  | O | 0.74767 |        | 0.4885 | 0.514   | 0.01267 | Uiso | 1         | -0.524231 |
| O5  | O | 0.52603 |        | 0.9007 | 0.4346  | 0.01267 | Uiso | 1         | -0.539586 |
| O6  | O | 0.41433 |        | 0.0255 | 0.5115  | 0.01267 | Uiso | 1         | -0.524235 |
| O7  | O | 0.6927  | 0.4661 | 0.9007 | 0.01267 | Uiso    | 1    | -0.539931 |           |

|     |   |         |       |        |         |         |      |           |           |
|-----|---|---------|-------|--------|---------|---------|------|-----------|-----------|
| O8  | O | 0.581   | 0.514 | 0.0255 | 0.01267 | Uiso    | 1    | -0.524611 |           |
| O9  | O | 0.35937 |       | 0.4346 | 0.5339  | 0.01267 | Uiso | 1         | -0.539122 |
| O10 | O | 0.24767 |       | 0.5115 | 0.486   | 0.01267 | Uiso | 1         | -0.524266 |
| O11 | O | 0.02603 |       | 0.0993 | 0.5654  | 0.01267 | Uiso | 1         | -0.539567 |
| O12 | O | 0.91433 |       | 0.9745 | 0.4885  | 0.01267 | Uiso | 1         | -0.524215 |

```

data_BEPPOD_clean
_audit_creation_date      2014-07-02
_audit_creation_method    'Materials Studio'
_symmetry_space_group_name_H-M  'P1'
_symmetry_Int_Tables_number  1
_symmetry_cell_setting    triclinic
loop_
_symmetry_equiv_pos_as_xyz
  x,y,z
_cell_length_a           10.3433
_cell_length_b           17.7336
_cell_length_c           17.7336
_cell_angle_alpha        120.0000
_cell_angle_beta         90.0000
_cell_angle_gamma        90.0000
loop_
_atom_site_label
_atom_site_type_symbol
_atom_site_fract_x
_atom_site_fract_y
_atom_site_fract_z
_atom_site_U_iso_or_equiv
_atom_site_adp_type
_atom_site_occupancy
_atom_site_charge
Zn1  Zn   0.8442 0.45553   0.92874   0.01267   Uiso  1   0.778612
Zn2  Zn   0.51087  0.47321   0.54447   0.01267   Uiso  1   0.778349
Zn3  Zn   0.17753  0.07126   0.52679   0.01267   Uiso  1   0.778463
Zn4  Zn   0.3442 0.54447   0.07126   0.01267   Uiso  1   0.778465
Zn5  Zn   0.01087  0.52679   0.45553   0.01267   Uiso  1   0.778447
Zn6  Zn   0.67753  0.92874   0.47321   0.01267   Uiso  1   0.778723
H1   H    0.3035 0.5714 0.6766 0.01267   Uiso  1   0.095825
H2   H    0.6318 0.476 0.6966 0.01267   Uiso  1   0.101478
H3   H    0.2516 0.618 0.8193 0.01267   Uiso  1   0.130594
H4   H    0.2343 0.4733 0.8458 0.01267   Uiso  1   0.084601
H5   H    0.2108 0.3263 0.8061 0.01267   Uiso  1   0.047051
H6   H    0.4462 0.6274 0.9799 0.01267   Uiso  1   0.115977
H7   H    0.2988 0.6236 0.9571 0.01267   Uiso  1   0.082201
H8   H    0.5934 0.5212 0.8411 0.01267   Uiso  1   0.13402
H9   H    0.4008 0.3599 0.9312 0.01267   Uiso  1   0.148898
H10  H    0.3695 0.2649 0.8569 0.01267   Uiso  1   0.150751
H11  H    0.2632 0.3203 0.9254 0.01267   Uiso  1   0.1473
H12  H    0.3527 0.3509 0.7215 0.01267   Uiso  1   0.148257
H13  H    0.41 0.276 0.734 0.01267   Uiso  1   0.144994
H14  H    0.4656 0.3707 0.7879 0.01267   Uiso  1   0.152995
H15  H    0.97017  0.1052 0.4286 0.01267   Uiso  1   0.096072
H16  H    0.29847  0.2206 0.524 0.01267   Uiso  1   0.10083
H17  H    0.91827  0.2013 0.382 0.01267   Uiso  1   0.131996
H18  H    0.90097  0.3725 0.5267 0.01267   Uiso  1   0.084743
H19  H    0.87747  0.4798 0.6737 0.01267   Uiso  1   0.047204

```

|     |   |         |        |        |         |      |   |          |
|-----|---|---------|--------|--------|---------|------|---|----------|
| H20 | H | 0.11287 | 0.3525 | 0.3726 | 0.01267 | Uiso | 1 | 0.116564 |
| H21 | H | 0.96547 | 0.3335 | 0.3764 | 0.01267 | Uiso | 1 | 0.08206  |
| H22 | H | 0.26007 | 0.3199 | 0.4788 | 0.01267 | Uiso | 1 | 0.134189 |
| H23 | H | 0.06747 | 0.5713 | 0.6401 | 0.01267 | Uiso | 1 | 0.14905  |
| H24 | H | 0.03617 | 0.592  | 0.7351 | 0.01267 | Uiso | 1 | 0.150907 |
| H25 | H | 0.92987 | 0.6051 | 0.6797 | 0.01267 | Uiso | 1 | 0.147685 |
| H26 | H | 0.01937 | 0.3706 | 0.6491 | 0.01267 | Uiso | 1 | 0.148603 |
| H27 | H | 0.07667 | 0.458  | 0.724  | 0.01267 | Uiso | 1 | 0.144827 |
| H28 | H | 0.13227 | 0.4172 | 0.6293 | 0.01267 | Uiso | 1 | 0.153494 |
| H29 | H | 0.63683 | 0.3234 | 0.8948 | 0.01267 | Uiso | 1 | 0.095647 |
| H30 | H | 0.96513 | 0.3034 | 0.7794 | 0.01267 | Uiso | 1 | 0.101674 |
| H31 | H | 0.58493 | 0.1807 | 0.7987 | 0.01267 | Uiso | 1 | 0.130824 |
| H32 | H | 0.56763 | 0.1542 | 0.6275 | 0.01267 | Uiso | 1 | 0.084603 |
| H33 | H | 0.54413 | 0.1939 | 0.5202 | 0.01267 | Uiso | 1 | 0.047231 |
| H34 | H | 0.77953 | 0.0201 | 0.6475 | 0.01267 | Uiso | 1 | 0.116333 |
| H35 | H | 0.63213 | 0.0429 | 0.6665 | 0.01267 | Uiso | 1 | 0.082291 |
| H36 | H | 0.92673 | 0.1589 | 0.6801 | 0.01267 | Uiso | 1 | 0.134465 |
| H37 | H | 0.73413 | 0.0688 | 0.4287 | 0.01267 | Uiso | 1 | 0.148648 |
| H38 | H | 0.70283 | 0.1431 | 0.408  | 0.01267 | Uiso | 1 | 0.150924 |
| H39 | H | 0.59653 | 0.0746 | 0.3949 | 0.01267 | Uiso | 1 | 0.147917 |
| H40 | H | 0.68603 | 0.2785 | 0.6294 | 0.01267 | Uiso | 1 | 0.148628 |
| H41 | H | 0.74333 | 0.266  | 0.542  | 0.01267 | Uiso | 1 | 0.144829 |
| H42 | H | 0.79893 | 0.2121 | 0.5828 | 0.01267 | Uiso | 1 | 0.153071 |
| H43 | H | 0.8035  | 0.4286 | 0.3234 | 0.01267 | Uiso | 1 | 0.095699 |
| H44 | H | 0.1318  | 0.524  | 0.3034 | 0.01267 | Uiso | 1 | 0.101544 |
| H45 | H | 0.7516  | 0.382  | 0.1807 | 0.01267 | Uiso | 1 | 0.130628 |
| H46 | H | 0.7343  | 0.5267 | 0.1542 | 0.01267 | Uiso | 1 | 0.084258 |
| H47 | H | 0.7108  | 0.6737 | 0.1939 | 0.01267 | Uiso | 1 | 0.047119 |
| H48 | H | 0.9462  | 0.3726 | 0.0201 | 0.01267 | Uiso | 1 | 0.11604  |
| H49 | H | 0.7988  | 0.3764 | 0.0429 | 0.01267 | Uiso | 1 | 0.082176 |
| H50 | H | 0.0934  | 0.4788 | 0.1589 | 0.01267 | Uiso | 1 | 0.134219 |
| H51 | H | 0.9008  | 0.6401 | 0.0688 | 0.01267 | Uiso | 1 | 0.148803 |
| H52 | H | 0.8695  | 0.7351 | 0.1431 | 0.01267 | Uiso | 1 | 0.15081  |
| H53 | H | 0.7632  | 0.6797 | 0.0746 | 0.01267 | Uiso | 1 | 0.147435 |
| H54 | H | 0.8527  | 0.6491 | 0.2785 | 0.01267 | Uiso | 1 | 0.148058 |
| H55 | H | 0.91    | 0.724  | 0.266  | 0.01267 | Uiso | 1 | 0.145056 |
| H56 | H | 0.9656  | 0.6293 | 0.2121 | 0.01267 | Uiso | 1 | 0.152881 |
| H57 | H | 0.47017 | 0.8948 | 0.5714 | 0.01267 | Uiso | 1 | 0.096251 |
| H58 | H | 0.79847 | 0.7794 | 0.476  | 0.01267 | Uiso | 1 | 0.100834 |
| H59 | H | 0.41827 | 0.7987 | 0.618  | 0.01267 | Uiso | 1 | 0.131639 |
| H60 | H | 0.40097 | 0.6275 | 0.4733 | 0.01267 | Uiso | 1 | 0.08498  |
| H61 | H | 0.37747 | 0.5202 | 0.3263 | 0.01267 | Uiso | 1 | 0.047379 |
| H62 | H | 0.61287 | 0.6475 | 0.6274 | 0.01267 | Uiso | 1 | 0.116336 |
| H63 | H | 0.46547 | 0.6665 | 0.6236 | 0.01267 | Uiso | 1 | 0.081979 |
| H64 | H | 0.76007 | 0.6801 | 0.5212 | 0.01267 | Uiso | 1 | 0.134036 |
| H65 | H | 0.56747 | 0.4287 | 0.3599 | 0.01267 | Uiso | 1 | 0.148934 |
| H66 | H | 0.53617 | 0.408  | 0.2649 | 0.01267 | Uiso | 1 | 0.15111  |
| H67 | H | 0.42987 | 0.3949 | 0.3203 | 0.01267 | Uiso | 1 | 0.147656 |
| H68 | H | 0.51937 | 0.6294 | 0.3509 | 0.01267 | Uiso | 1 | 0.148816 |
| H69 | H | 0.57667 | 0.542  | 0.276  | 0.01267 | Uiso | 1 | 0.145022 |
| H70 | H | 0.63227 | 0.5828 | 0.3707 | 0.01267 | Uiso | 1 | 0.15335  |
| H71 | H | 0.13683 | 0.6766 | 0.1052 | 0.01267 | Uiso | 1 | 0.095584 |

|     |   |         |        |        |         |      |   |           |
|-----|---|---------|--------|--------|---------|------|---|-----------|
| H72 | H | 0.46513 | 0.6966 | 0.2206 | 0.01267 | Uiso | 1 | 0.101607  |
| H73 | H | 0.08493 | 0.8193 | 0.2013 | 0.01267 | Uiso | 1 | 0.130908  |
| H74 | H | 0.06763 | 0.8458 | 0.3725 | 0.01267 | Uiso | 1 | 0.084756  |
| H75 | H | 0.04413 | 0.8061 | 0.4798 | 0.01267 | Uiso | 1 | 0.047081  |
| H76 | H | 0.27953 | 0.9799 | 0.3525 | 0.01267 | Uiso | 1 | 0.116577  |
| H77 | H | 0.13213 | 0.9571 | 0.3335 | 0.01267 | Uiso | 1 | 0.082379  |
| H78 | H | 0.42673 | 0.8411 | 0.3199 | 0.01267 | Uiso | 1 | 0.134425  |
| H79 | H | 0.23413 | 0.9312 | 0.5713 | 0.01267 | Uiso | 1 | 0.148817  |
| H80 | H | 0.20283 | 0.8569 | 0.592  | 0.01267 | Uiso | 1 | 0.15071   |
| H81 | H | 0.09653 | 0.9254 | 0.6051 | 0.01267 | Uiso | 1 | 0.147922  |
| H82 | H | 0.18603 | 0.7215 | 0.3706 | 0.01267 | Uiso | 1 | 0.148675  |
| H83 | H | 0.24333 | 0.734  | 0.458  | 0.01267 | Uiso | 1 | 0.144526  |
| H84 | H | 0.29893 | 0.7879 | 0.4172 | 0.01267 | Uiso | 1 | 0.153267  |
| C1  | C | 0.1389  | 0.4673 | 0.9447 | 0.01267 | Uiso | 1 | 0.605305  |
| C2  | C | 0.3623  | 0.5617 | 0.7105 | 0.01267 | Uiso | 1 | 0.096518  |
| C3  | C | 0.5559  | 0.5058 | 0.7225 | 0.01267 | Uiso | 1 | 0.046012  |
| C4  | C | 0.3294  | 0.5893 | 0.7965 | 0.01267 | Uiso | 1 | -0.22827  |
| C5  | C | 0.2571  | 0.4537 | 0.8869 | 0.01267 | Uiso | 1 | -0.087912 |
| C6  | C | 0.2905  | 0.3573 | 0.8346 | 0.01267 | Uiso | 1 | 0.133505  |
| C7  | C | 0.3795  | 0.5915 | 0.9391 | 0.01267 | Uiso | 1 | -0.162895 |
| C8  | C | 0.4145  | 0.5735 | 0.8483 | 0.01267 | Uiso | 1 | 0.188939  |
| C9  | C | 0.5321  | 0.5315 | 0.809  | 0.01267 | Uiso | 1 | -0.18105  |
| C10 | C | 0.335   | 0.3224 | 0.8922 | 0.01267 | Uiso | 1 | -0.528512 |
| C11 | C | 0.3888  | 0.3368 | 0.7628 | 0.01267 | Uiso | 1 | -0.52423  |
| C12 | C | 0.80557 | 0.4774 | 0.5327 | 0.01267 | Uiso | 1 | 0.604862  |
| C13 | C | 0.02897 | 0.1488 | 0.4383 | 0.01267 | Uiso | 1 | 0.095635  |
| C14 | C | 0.22257 | 0.2167 | 0.4942 | 0.01267 | Uiso | 1 | 0.04671   |
| C15 | C | 0.99607 | 0.2072 | 0.4107 | 0.01267 | Uiso | 1 | -0.229903 |
| C16 | C | 0.92377 | 0.4332 | 0.5463 | 0.01267 | Uiso | 1 | -0.087197 |
| C17 | C | 0.95717 | 0.4773 | 0.6427 | 0.01267 | Uiso | 1 | 0.133265  |
| C18 | C | 0.04617 | 0.3476 | 0.4085 | 0.01267 | Uiso | 1 | -0.163822 |
| C19 | C | 0.08117 | 0.2748 | 0.4265 | 0.01267 | Uiso | 1 | 0.19009   |
| C20 | C | 0.19877 | 0.2775 | 0.4685 | 0.01267 | Uiso | 1 | -0.180986 |
| C21 | C | 0.00167 | 0.5698 | 0.6776 | 0.01267 | Uiso | 1 | -0.52897  |
| C22 | C | 0.05547 | 0.426  | 0.6632 | 0.01267 | Uiso | 1 | -0.525568 |
| C23 | C | 0.47223 | 0.0553 | 0.5226 | 0.01267 | Uiso | 1 | 0.604701  |
| C24 | C | 0.69563 | 0.2895 | 0.8512 | 0.01267 | Uiso | 1 | 0.096729  |
| C25 | C | 0.88923 | 0.2775 | 0.7833 | 0.01267 | Uiso | 1 | 0.046115  |
| C26 | C | 0.66273 | 0.2035 | 0.7928 | 0.01267 | Uiso | 1 | -0.229147 |
| C27 | C | 0.59043 | 0.1131 | 0.5668 | 0.01267 | Uiso | 1 | -0.086583 |
| C28 | C | 0.62383 | 0.1654 | 0.5227 | 0.01267 | Uiso | 1 | 0.132806  |
| C29 | C | 0.71283 | 0.0609 | 0.6524 | 0.01267 | Uiso | 1 | -0.163908 |
| C30 | C | 0.74783 | 0.1517 | 0.7252 | 0.01267 | Uiso | 1 | 0.190204  |
| C31 | C | 0.86543 | 0.191  | 0.7225 | 0.01267 | Uiso | 1 | -0.181767 |
| C32 | C | 0.66833 | 0.1078 | 0.4302 | 0.01267 | Uiso | 1 | -0.528822 |
| C33 | C | 0.72213 | 0.2372 | 0.574  | 0.01267 | Uiso | 1 | -0.52455  |
| C34 | C | 0.6389  | 0.5327 | 0.0553 | 0.01267 | Uiso | 1 | 0.60505   |
| C35 | C | 0.8623  | 0.4383 | 0.2895 | 0.01267 | Uiso | 1 | 0.096572  |
| C36 | C | 0.0559  | 0.4942 | 0.2775 | 0.01267 | Uiso | 1 | 0.046196  |
| C37 | C | 0.8294  | 0.4107 | 0.2035 | 0.01267 | Uiso | 1 | -0.228225 |
| C38 | C | 0.7571  | 0.5463 | 0.1131 | 0.01267 | Uiso | 1 | -0.08756  |
| C39 | C | 0.7905  | 0.6427 | 0.1654 | 0.01267 | Uiso | 1 | 0.133205  |

|     |   |         |        |        |         |         |      |           |           |
|-----|---|---------|--------|--------|---------|---------|------|-----------|-----------|
| C40 | C | 0.8795  | 0.4085 | 0.0609 | 0.01267 | Uiso    | 1    | -0.163201 |           |
| C41 | C | 0.9145  | 0.4265 | 0.1517 | 0.01267 | Uiso    | 1    | 0.18886   |           |
| C42 | C | 0.0321  | 0.4685 | 0.191  | 0.01267 | Uiso    | 1    | -0.181055 |           |
| C43 | C | 0.835   | 0.6776 | 0.1078 | 0.01267 | Uiso    | 1    | -0.52816  |           |
| C44 | C | 0.8888  | 0.6632 | 0.2372 | 0.01267 | Uiso    | 1    | -0.524137 |           |
| C45 | C | 0.30557 |        | 0.5226 | 0.4673  | 0.01267 | Uiso | 1         | 0.604907  |
| C46 | C | 0.52897 |        | 0.8512 | 0.5617  | 0.01267 | Uiso | 1         | 0.095454  |
| C47 | C | 0.72257 |        | 0.7833 | 0.5058  | 0.01267 | Uiso | 1         | 0.046862  |
| C48 | C | 0.49607 |        | 0.7928 | 0.5893  | 0.01267 | Uiso | 1         | -0.229473 |
| C49 | C | 0.42377 |        | 0.5668 | 0.4537  | 0.01267 | Uiso | 1         | -0.087302 |
| C50 | C | 0.45717 |        | 0.5227 | 0.3573  | 0.01267 | Uiso | 1         | 0.133295  |
| C51 | C | 0.54617 |        | 0.6524 | 0.5915  | 0.01267 | Uiso | 1         | -0.163682 |
| C52 | C | 0.58117 |        | 0.7252 | 0.5735  | 0.01267 | Uiso | 1         | 0.190005  |
| C53 | C | 0.69877 |        | 0.7225 | 0.5315  | 0.01267 | Uiso | 1         | -0.181123 |
| C54 | C | 0.50167 |        | 0.4302 | 0.3224  | 0.01267 | Uiso | 1         | -0.529273 |
| C55 | C | 0.55547 |        | 0.574  | 0.3368  | 0.01267 | Uiso | 1         | -0.525564 |
| C56 | C | 0.97223 |        | 0.9447 | 0.4774  | 0.01267 | Uiso | 1         | 0.604456  |
| C57 | C | 0.19563 |        | 0.7105 | 0.1488  | 0.01267 | Uiso | 1         | 0.097019  |
| C58 | C | 0.38923 |        | 0.7225 | 0.2167  | 0.01267 | Uiso | 1         | 0.046074  |
| C59 | C | 0.16273 |        | 0.7965 | 0.2072  | 0.01267 | Uiso | 1         | -0.229288 |
| C60 | C | 0.09043 |        | 0.8869 | 0.4332  | 0.01267 | Uiso | 1         | -0.086878 |
| C61 | C | 0.12383 |        | 0.8346 | 0.4773  | 0.01267 | Uiso | 1         | 0.132928  |
| C62 | C | 0.21283 |        | 0.9391 | 0.3476  | 0.01267 | Uiso | 1         | -0.163878 |
| C63 | C | 0.24783 |        | 0.8483 | 0.2748  | 0.01267 | Uiso | 1         | 0.190298  |
| C64 | C | 0.36543 |        | 0.809  | 0.2775  | 0.01267 | Uiso | 1         | -0.181692 |
| C65 | C | 0.16833 |        | 0.8922 | 0.5698  | 0.01267 | Uiso | 1         | -0.528951 |
| C66 | C | 0.22213 |        | 0.7628 | 0.426   | 0.01267 | Uiso | 1         | -0.524577 |
| N1  | N | 0.4707  | 0.523  | 0.6746 | 0.01267 | Uiso    | 1    | -0.213162 |           |
| N2  | N | 0.3659  | 0.5086 | 0.942  | 0.01267 | Uiso    | 1    | -0.505273 |           |
| N3  | N | 0.13737 |        | 0.1516 | 0.477   | 0.01267 | Uiso | 1         | -0.213256 |
| N4  | N | 0.03257 |        | 0.4334 | 0.4914  | 0.01267 | Uiso | 1         | -0.505922 |
| N5  | N | 0.80403 |        | 0.3254 | 0.8484  | 0.01267 | Uiso | 1         | -0.213562 |
| N6  | N | 0.69923 |        | 0.058  | 0.5666  | 0.01267 | Uiso | 1         | -0.506526 |
| N7  | N | 0.9707  | 0.477  | 0.3254 | 0.01267 | Uiso    | 1    | -0.213516 |           |
| N8  | N | 0.8659  | 0.4914 | 0.058  | 0.01267 | Uiso    | 1    | -0.505143 |           |
| N9  | N | 0.63737 |        | 0.8484 | 0.523   | 0.01267 | Uiso | 1         | -0.213111 |
| N10 | N | 0.53257 |        | 0.5666 | 0.5086  | 0.01267 | Uiso | 1         | -0.505942 |
| N11 | N | 0.30403 |        | 0.6746 | 0.1516  | 0.01267 | Uiso | 1         | -0.21366  |
| N12 | N | 0.19923 |        | 0.942  | 0.4334  | 0.01267 | Uiso | 1         | -0.506577 |
| O1  | O | 0.0381  | 0.4288 | 0.9026 | 0.01267 | Uiso    | 1    | -0.571053 |           |
| O2  | O | 0.1479  | 0.5147 | 0.0253 | 0.01267 | Uiso    | 1    | -0.531321 |           |
| O3  | O | 0.70477 |        | 0.4738 | 0.5712  | 0.01267 | Uiso | 1         | -0.570884 |
| O4  | O | 0.81457 |        | 0.5106 | 0.4853  | 0.01267 | Uiso | 1         | -0.530653 |
| O5  | O | 0.37143 |        | 0.0974 | 0.5262  | 0.01267 | Uiso | 1         | -0.570454 |
| O6  | O | 0.48123 |        | 0.9747 | 0.4894  | 0.01267 | Uiso | 1         | -0.531074 |
| O7  | O | 0.5381  | 0.5712 | 0.0974 | 0.01267 | Uiso    | 1    | -0.570917 |           |
| O8  | O | 0.6479  | 0.4853 | 0.9747 | 0.01267 | Uiso    | 1    | -0.531049 |           |
| O9  | O | 0.20477 |        | 0.5262 | 0.4288  | 0.01267 | Uiso | 1         | -0.570734 |
| O10 | O | 0.31457 |        | 0.4894 | 0.5147  | 0.01267 | Uiso | 1         | -0.530984 |
| O11 | O | 0.87143 |        | 0.9026 | 0.4738  | 0.01267 | Uiso | 1         | -0.570539 |
| O12 | O | 0.98123 |        | 0.0253 | 0.5106  | 0.01267 | Uiso | 1         | -0.530746 |

```

data_BEPPAP_clean
_audit_creation_date      2014-07-02
_audit_creation_method    'Materials Studio'
_symmetry_space_group_name_H-M  'P1'
_symmetry_Int_Tables_number  1
_symmetry_cell_setting    triclinic
loop_
_symmetry_equiv_pos_as_xyz
  x,y,z
_cell_length_a           10.2448
_cell_length_b           17.4587
_cell_length_c           17.4587
_cell_angle_alpha        120.0000
_cell_angle_beta         90.0000
_cell_angle_gamma        90.0000
loop_
_atom_site_label
_atom_site_type_symbol
_atom_site_fract_x
_atom_site_fract_y
_atom_site_fract_z
_atom_site_U_iso_or_equiv
_atom_site_adp_type
_atom_site_occupancy
_atom_site_charge
Zn1  Zn   0.84569   0.4581 0.53313   0.01267   Uiso  1   0.709949
Zn2  Zn   0.51236   0.07503  0.5419 0.01267   Uiso  1   0.710563
Zn3  Zn   0.17902   0.46687  0.92497 0.01267   Uiso  1   0.710386
Zn4  Zn   0.34569   0.5419 0.46687   0.01267   Uiso  1   0.709876
Zn5  Zn   0.01236   0.92497  0.4581 0.01267   Uiso  1   0.710732
Zn6  Zn   0.67902   0.53313  0.07503 0.01267   Uiso  1   0.710378
H1   H    0.9542 0.5355 0.4614 0.01267   Uiso  1   0.263527
H2   H    0.8797 0.4786 0.3152 0.01267   Uiso  1   0.160138
H3   H    0.7301 0.4578 0.2988 0.01267   Uiso  1   0.180401
H4   H    0.8153 0.4113 0.3384 0.01267   Uiso  1   0.163697
H5   H    0.766  0.5959 0.4293 0.01267   Uiso  1   0.072623
H6   H    0.7761 0.7957 0.619  0.01267   Uiso  1   0.142319
H7   H    0.8192 0.8969 0.5753 0.01267   Uiso  1   0.1007
H8   H    0.068  0.6452 0.4606 0.01267   Uiso  1   0.135535
H9   H    0.1065 0.7529 0.4249 0.01267   Uiso  1   0.106436
H10  H    0.9571 0.6376 0.607  0.01267   Uiso  1   0.136815
H11  H    0.8069 0.652  0.6023 0.01267   Uiso  1   0.115726
H12  H    0.62087  0.9259 0.4645 0.01267   Uiso  1   0.262934
H13  H    0.54637  0.8366 0.5214 0.01267   Uiso  1   0.160202
H14  H    0.39677  0.841  0.5422 0.01267   Uiso  1   0.179877
H15  H    0.48197  0.9271 0.5887 0.01267   Uiso  1   0.163405
H16  H    0.43267  0.8334 0.4041 0.01267   Uiso  1   0.072286
H17  H    0.44277  0.8233 0.2043 0.01267   Uiso  1   0.143196
H18  H    0.48587  0.6784 0.1031 0.01267   Uiso  1   0.099848
H19  H    0.73467  0.8154 0.3548 0.01267   Uiso  1   0.135477

```

|     |   |         |        |        |         |      |   |           |
|-----|---|---------|--------|--------|---------|------|---|-----------|
| H20 | H | 0.77317 | 0.672  | 0.2471 | 0.01267 | Uiso | 1 | 0.107362  |
| H21 | H | 0.62377 | 0.9694 | 0.3624 | 0.01267 | Uiso | 1 | 0.136036  |
| H22 | H | 0.47357 | 0.9503 | 0.348  | 0.01267 | Uiso | 1 | 0.115398  |
| H23 | H | 0.28753 | 0.5386 | 0.0741 | 0.01267 | Uiso | 1 | 0.263157  |
| H24 | H | 0.21303 | 0.6848 | 0.1634 | 0.01267 | Uiso | 1 | 0.160325  |
| H25 | H | 0.06343 | 0.7012 | 0.159  | 0.01267 | Uiso | 1 | 0.180709  |
| H26 | H | 0.14863 | 0.6616 | 0.0729 | 0.01267 | Uiso | 1 | 0.163666  |
| H27 | H | 0.09933 | 0.5707 | 0.1666 | 0.01267 | Uiso | 1 | 0.072629  |
| H28 | H | 0.10943 | 0.381  | 0.1767 | 0.01267 | Uiso | 1 | 0.142906  |
| H29 | H | 0.15253 | 0.4247 | 0.3216 | 0.01267 | Uiso | 1 | 0.100583  |
| H30 | H | 0.40133 | 0.5394 | 0.1846 | 0.01267 | Uiso | 1 | 0.136123  |
| H31 | H | 0.43983 | 0.5751 | 0.328  | 0.01267 | Uiso | 1 | 0.106543  |
| H32 | H | 0.29043 | 0.393  | 0.0306 | 0.01267 | Uiso | 1 | 0.136852  |
| H33 | H | 0.14023 | 0.3977 | 0.0497 | 0.01267 | Uiso | 1 | 0.114554  |
| H34 | H | 0.4542  | 0.4645 | 0.5386 | 0.01267 | Uiso | 1 | 0.263664  |
| H35 | H | 0.3797  | 0.5214 | 0.6848 | 0.01267 | Uiso | 1 | 0.160137  |
| H36 | H | 0.2301  | 0.5422 | 0.7012 | 0.01267 | Uiso | 1 | 0.180451  |
| H37 | H | 0.3153  | 0.5887 | 0.6616 | 0.01267 | Uiso | 1 | 0.163899  |
| H38 | H | 0.266   | 0.4041 | 0.5707 | 0.01267 | Uiso | 1 | 0.0724    |
| H39 | H | 0.2761  | 0.2043 | 0.381  | 0.01267 | Uiso | 1 | 0.14223   |
| H40 | H | 0.3192  | 0.1031 | 0.4247 | 0.01267 | Uiso | 1 | 0.100407  |
| H41 | H | 0.568   | 0.3548 | 0.5394 | 0.01267 | Uiso | 1 | 0.135656  |
| H42 | H | 0.6065  | 0.2471 | 0.5751 | 0.01267 | Uiso | 1 | 0.106481  |
| H43 | H | 0.4571  | 0.3624 | 0.393  | 0.01267 | Uiso | 1 | 0.136774  |
| H44 | H | 0.3069  | 0.348  | 0.3977 | 0.01267 | Uiso | 1 | 0.115682  |
| H45 | H | 0.12087 | 0.0741 | 0.5355 | 0.01267 | Uiso | 1 | 0.263039  |
| H46 | H | 0.04637 | 0.1634 | 0.4786 | 0.01267 | Uiso | 1 | 0.160296  |
| H47 | H | 0.89677 | 0.159  | 0.4578 | 0.01267 | Uiso | 1 | 0.180008  |
| H48 | H | 0.98197 | 0.0729 | 0.4113 | 0.01267 | Uiso | 1 | 0.163145  |
| H49 | H | 0.93267 | 0.1666 | 0.5959 | 0.01267 | Uiso | 1 | 0.072578  |
| H50 | H | 0.94277 | 0.1767 | 0.7957 | 0.01267 | Uiso | 1 | 0.143037  |
| H51 | H | 0.98587 | 0.3216 | 0.8969 | 0.01267 | Uiso | 1 | 0.099991  |
| H52 | H | 0.23467 | 0.1846 | 0.6452 | 0.01267 | Uiso | 1 | 0.135371  |
| H53 | H | 0.27317 | 0.328  | 0.7529 | 0.01267 | Uiso | 1 | 0.107503  |
| H54 | H | 0.12377 | 0.0306 | 0.6376 | 0.01267 | Uiso | 1 | 0.135858  |
| H55 | H | 0.97357 | 0.0497 | 0.652  | 0.01267 | Uiso | 1 | 0.115396  |
| H56 | H | 0.78753 | 0.4614 | 0.9259 | 0.01267 | Uiso | 1 | 0.263013  |
| H57 | H | 0.71303 | 0.3152 | 0.8366 | 0.01267 | Uiso | 1 | 0.160234  |
| H58 | H | 0.56343 | 0.2988 | 0.841  | 0.01267 | Uiso | 1 | 0.180608  |
| H59 | H | 0.64863 | 0.3384 | 0.9271 | 0.01267 | Uiso | 1 | 0.163744  |
| H60 | H | 0.59933 | 0.4293 | 0.8334 | 0.01267 | Uiso | 1 | 0.072673  |
| H61 | H | 0.60943 | 0.619  | 0.8233 | 0.01267 | Uiso | 1 | 0.143055  |
| H62 | H | 0.65253 | 0.5753 | 0.6784 | 0.01267 | Uiso | 1 | 0.100665  |
| H63 | H | 0.90133 | 0.4606 | 0.8154 | 0.01267 | Uiso | 1 | 0.136054  |
| H64 | H | 0.93983 | 0.4249 | 0.672  | 0.01267 | Uiso | 1 | 0.106336  |
| H65 | H | 0.79043 | 0.607  | 0.9694 | 0.01267 | Uiso | 1 | 0.137115  |
| H66 | H | 0.64023 | 0.6023 | 0.9503 | 0.01267 | Uiso | 1 | 0.114708  |
| C1  | C | 0.8022  | 0.4651 | 0.3371 | 0.01267 | Uiso | 1 | -0.50738  |
| C2  | C | 0.773   | 0.5405 | 0.4304 | 0.01267 | Uiso | 1 | 0.039486  |
| C3  | C | 0.843   | 0.7853 | 0.579  | 0.01267 | Uiso | 1 | -0.207175 |
| C4  | C | 0.8702  | 0.8462 | 0.5531 | 0.01267 | Uiso | 1 | 0.071966  |
| C5  | C | 0.6442  | 0.523  | 0.4629 | 0.01267 | Uiso | 1 | 0.583885  |

|     |   |         |         |         |         |         |      |           |           |
|-----|---|---------|---------|---------|---------|---------|------|-----------|-----------|
| C6  | C | 0.9163  | 0.708   | 0.5448  | 0.01267 | Uiso    | 1    | 0.160424  |           |
| C7  | C | 0.0171  | 0.6961  | 0.4852  | 0.01267 | Uiso    | 1    | -0.183033 |           |
| C8  | C | 0.0391  | 0.7609  | 0.4639  | 0.01267 | Uiso    | 1    | 0.09817   |           |
| C9  | C | 0.8878  | 0.6376  | 0.5691  | 0.01267 | Uiso    | 1    | -0.140122 |           |
| C10 | C | 0.46887 |         | 0.872   | 0.5349  | 0.01267 | Uiso | 1         | -0.507052 |
| C11 | C | 0.43967 |         | 0.8899  | 0.4595  | 0.01267 | Uiso | 1         | 0.040778  |
| C12 | C | 0.50967 |         | 0.7937  | 0.2147  | 0.01267 | Uiso | 1         | -0.207996 |
| C13 | C | 0.53687 |         | 0.7069  | 0.1538  | 0.01267 | Uiso | 1         | 0.072564  |
| C14 | C | 0.31087 |         | 0.9399  | 0.477   | 0.01267 | Uiso | 1         | 0.58398   |
| C15 | C | 0.58297 |         | 0.8368  | 0.292   | 0.01267 | Uiso | 1         | 0.160281  |
| C16 | C | 0.68377 |         | 0.7891  | 0.3039  | 0.01267 | Uiso | 1         | -0.183091 |
| C17 | C | 0.70577 |         | 0.703   | 0.2391  | 0.01267 | Uiso | 1         | 0.098158  |
| C18 | C | 0.55447 |         | 0.9315  | 0.3624  | 0.01267 | Uiso | 1         | -0.138911 |
| C19 | C | 0.13553 |         | 0.6629  | 0.128   | 0.01267 | Uiso | 1         | -0.507588 |
| C20 | C | 0.10633 |         | 0.5696  | 0.1101  | 0.01267 | Uiso | 1         | 0.039098  |
| C21 | C | 0.17633 |         | 0.421   | 0.2063  | 0.01267 | Uiso | 1         | -0.207056 |
| C22 | C | 0.20353 |         | 0.4469  | 0.2931  | 0.01267 | Uiso | 1         | 0.070885  |
| C23 | C | 0.97753 |         | 0.5371  | 0.0601  | 0.01267 | Uiso | 1         | 0.584427  |
| C24 | C | 0.24963 |         | 0.4552  | 0.1632  | 0.01267 | Uiso | 1         | 0.161683  |
| C25 | C | 0.35043 |         | 0.5148  | 0.2109  | 0.01267 | Uiso | 1         | -0.18406  |
| C26 | C | 0.37243 |         | 0.5361  | 0.297   | 0.01267 | Uiso | 1         | 0.098158  |
| C27 | C | 0.22113 |         | 0.4309  | 0.0685  | 0.01267 | Uiso | 1         | -0.140185 |
| C28 | C | 0.3022  | 0.5349  | 0.6629  | 0.01267 | Uiso    | 1    | -0.507359 |           |
| C29 | C | 0.273   | 0.4595  | 0.5696  | 0.01267 | Uiso    | 1    | 0.039364  |           |
| C30 | C | 0.343   | 0.2147  | 0.421   | 0.01267 | Uiso    | 1    | -0.207208 |           |
| C31 | C | 0.3702  | 0.1538  | 0.4469  | 0.01267 | Uiso    | 1    | 0.072146  |           |
| C32 | C | 0.1442  | 0.477   | 0.5371  | 0.01267 | Uiso    | 1    | 0.584044  |           |
| C33 | C | 0.4163  | 0.292   | 0.4552  | 0.01267 | Uiso    | 1    | 0.160399  |           |
| C34 | C | 0.5171  | 0.3039  | 0.5148  | 0.01267 | Uiso    | 1    | -0.182848 |           |
| C35 | C | 0.5391  | 0.2391  | 0.5361  | 0.01267 | Uiso    | 1    | 0.098121  |           |
| C36 | C | 0.3878  | 0.3624  | 0.4309  | 0.01267 | Uiso    | 1    | -0.140106 |           |
| C37 | C | 0.96887 |         | 0.128   | 0.4651  | 0.01267 | Uiso | 1         | -0.506943 |
| C38 | C | 0.93967 |         | 0.1101  | 0.5405  | 0.01267 | Uiso | 1         | 0.040636  |
| C39 | C | 0.00967 |         | 0.2063  | 0.7853  | 0.01267 | Uiso | 1         | -0.207994 |
| C40 | C | 0.03687 |         | 0.2931  | 0.8462  | 0.01267 | Uiso | 1         | 0.072393  |
| C41 | C | 0.81087 |         | 0.0601  | 0.523   | 0.01267 | Uiso | 1         | 0.584458  |
| C42 | C | 0.08297 |         | 0.1632  | 0.708   | 0.01267 | Uiso | 1         | 0.160243  |
| C43 | C | 0.18377 |         | 0.2109  | 0.6961  | 0.01267 | Uiso | 1         | -0.183139 |
| C44 | C | 0.20577 |         | 0.297   | 0.7609  | 0.01267 | Uiso | 1         | 0.098099  |
| C45 | C | 0.05447 |         | 0.0685  | 0.6376  | 0.01267 | Uiso | 1         | -0.138973 |
| C46 | C | 0.63553 |         | 0.3371  | 0.872   | 0.01267 | Uiso | 1         | -0.507753 |
| C47 | C | 0.60633 |         | 0.4304  | 0.8899  | 0.01267 | Uiso | 1         | 0.038838  |
| C48 | C | 0.67633 |         | 0.579   | 0.7937  | 0.01267 | Uiso | 1         | -0.206964 |
| C49 | C | 0.70353 |         | 0.5531  | 0.7069  | 0.01267 | Uiso | 1         | 0.071038  |
| C50 | C | 0.47753 |         | 0.4629  | 0.9399  | 0.01267 | Uiso | 1         | 0.584569  |
| C51 | C | 0.74963 |         | 0.5448  | 0.8368  | 0.01267 | Uiso | 1         | 0.161625  |
| C52 | C | 0.85043 |         | 0.4852  | 0.7891  | 0.01267 | Uiso | 1         | -0.184057 |
| C53 | C | 0.87243 |         | 0.4639  | 0.703   | 0.01267 | Uiso | 1         | 0.098095  |
| C54 | C | 0.72113 |         | 0.5691  | 0.9315  | 0.01267 | Uiso | 1         | -0.1403   |
| N1  | N | 0.8771  | 0.5488  | 0.49117 | 0.01267 | Uiso    | 1    | -0.332946 |           |
| N2  | N | 0.9678  | 0.83531 | 0.4969  | 0.01267 | Uiso    | 1    | -0.195857 |           |
| N3  | N | 0.54377 | 0.94237 | 0.4512  | 0.01267 | Uiso    | 1    | -0.333564 |           |

|     |    |         |         |         |         |      |   |           |
|-----|----|---------|---------|---------|---------|------|---|-----------|
| N4  | N  | 0.63447 | 0.66159 | 0.16469 | 0.01267 | Uiso | 1 | -0.196448 |
| N5  | N  | 0.21043 | 0.50883 | 0.05763 | 0.01267 | Uiso | 1 | -0.332325 |
| N6  | N  | 0.30113 | 0.5031  | 0.33841 | 0.01267 | Uiso | 1 | -0.195739 |
| N7  | N  | 0.3771  | 0.4512  | 0.50883 | 0.01267 | Uiso | 1 | -0.332993 |
| N8  | N  | 0.4678  | 0.16469 | 0.5031  | 0.01267 | Uiso | 1 | -0.196024 |
| N9  | N  | 0.04377 | 0.05763 | 0.5488  | 0.01267 | Uiso | 1 | -0.333726 |
| N10 | N  | 0.13447 | 0.33841 | 0.83531 | 0.01267 | Uiso | 1 | -0.196024 |
| N11 | N  | 0.71043 | 0.49117 | 0.94237 | 0.01267 | Uiso | 1 | -0.33213  |
| N12 | N  | 0.80113 | 0.4969  | 0.66159 | 0.01267 | Uiso | 1 | -0.195854 |
| Cl1 | Cl | 0.82973 | 0.31249 | 0.43838 | 0.01267 | Uiso | 1 | -0.564048 |
| Cl2 | Cl | 0.4964  | 0.12589 | 0.68751 | 0.01267 | Uiso | 1 | -0.56403  |
| Cl3 | Cl | 0.16306 | 0.56162 | 0.87411 | 0.01267 | Uiso | 1 | -0.563828 |
| Cl4 | Cl | 0.32973 | 0.68751 | 0.56162 | 0.01267 | Uiso | 1 | -0.563828 |
| Cl5 | Cl | 0.9964  | 0.87411 | 0.31249 | 0.01267 | Uiso | 1 | -0.564133 |
| Cl6 | Cl | 0.66306 | 0.43838 | 0.12589 | 0.01267 | Uiso | 1 | -0.563969 |
| O1  | O  | 0.6488  | 0.49114 | 0.51354 | 0.01267 | Uiso | 1 | -0.554738 |
| O2  | O  | 0.542   | 0.5392  | 0.43371 | 0.01267 | Uiso | 1 | -0.556437 |
| O3  | O  | 0.31547 | 0.0224  | 0.50886 | 0.01267 | Uiso | 1 | -0.554627 |
| O4  | O  | 0.20867 | 0.89451 | 0.4608  | 0.01267 | Uiso | 1 | -0.556802 |
| O5  | O  | 0.98213 | 0.48646 | 0.9776  | 0.01267 | Uiso | 1 | -0.554684 |
| O6  | O  | 0.87533 | 0.56629 | 0.10549 | 0.01267 | Uiso | 1 | -0.55706  |
| O7  | O  | 0.1488  | 0.50886 | 0.48646 | 0.01267 | Uiso | 1 | -0.554631 |
| O8  | O  | 0.042   | 0.4608  | 0.56629 | 0.01267 | Uiso | 1 | -0.556578 |
| O9  | O  | 0.81547 | 0.9776  | 0.49114 | 0.01267 | Uiso | 1 | -0.555261 |
| O10 | O  | 0.70867 | 0.10549 | 0.5392  | 0.01267 | Uiso | 1 | -0.556681 |
| O11 | O  | 0.48213 | 0.51354 | 0.0224  | 0.01267 | Uiso | 1 | -0.554466 |
| O12 | O  | 0.37533 | 0.43371 | 0.89451 | 0.01267 | Uiso | 1 | -0.557365 |
